# Supplementary material for: The sea lamprey meiotic map improves resolution of ancient vertebrate genome duplications
Source: HighWire-hosted journal article supplement (doi:10.1101/gr.184135.114), 2015-06-05
Supplement: Supplemental_Table_S1.xlsx [file Supplemental_Table_S1.xlsx]

## Sheet: ST1
Table S1 - The lamprey linkage map and anchored scaffolds from the lamprey genome assembly.
					BLAST alignment to Lamprey Genome Assembly
Marker	Linkage	Position	Genotypes	Marker	Genomic	%	Alignment	#	#	Marker Alignment			Scaffold Alignment
Name	Group	(cM)		Sequence	Scaffold	Identity	Length	SNPs	gaps	Start	End		Start	End	E-value	Bitscore
scf2899	I	0	<lmxll>,(ll,lm),ll,lm,ll,ll,lm,LM,ll,lm,ll,lm,lm,ll,ll,ll,lm,ll,lm,lm,lm,lm,ll,--,ll,ll,lm,LM,ll,ll,ll,LM	TGCAGGGGAATCTTGAAAAATGTGGCGAAGGCGCATTTCTGCTTCAAGTTTAGTGTTCCGCTGTGAGGACCGCTATGTGTGTCAGTGGACTTGCA	scaffold_2899	100	95	0	0	1	95		26160	26066	1e-46	188
scf270.5	I	5.379	<lmxll>,(ll,lm),ll,lm,ll,lm,lm,lm,ll,lm,ll,lm,--,ll,ll,ll,lm,ll,lm,lm,lm,lm,ll,ll,ll,ll,lm,lm,ll,ll,ll,lm	TGCAGGGCTTATCCACAGGCCGCTGAGGGGGACGGAAAGAATCTGGAAAAAAAAACAAATGTTTGTTATTGTTTGCCGAGAGGGGCCGTTTCTTC	scaffold_270	100	95	0	0	1	95		1337688	1337782	1e-30	135
scf270	I	7.699	<abxcd>,(ac,ad,bc,bd),bc,ad,bd,--,ac,--,bc,ad,bd,ac,--,bc,bc,bd,ac,bd,ad,ad,ac,ac,bc,--,bd,bd,ad,ac,bd,bd,bd,ac	TGCAGGGAAGTGTCCCACAAAACTGCAGCCACGTGCCGCCACCGCGTATAGCCAGGAGGATGTTCTCATTGCAGTGAGCAGTGTGTTCTTTTTTA	scaffold_270	98.95	95	1	0	1	95		1636542	1636636	2e-44	180
scf270.12	I	7.699	<nnxnp>,(nn,np),nn,np,np,np,nn,nn,nn,np,np,nn,nn,nn,nn,np,nn,np,np,np,nn,nn,nn,nn,np,np,np,nn,np,np,np,nn	TGCAGGCTTGATTCTCACCTGGCGGAGATTTGGATCCACGTTTGGCGCTGAGTCCTCGCGCTCGGACGATCTCAACCTCCAGGTGACCTGTCCTG	scaffold_270	98.95	95	1	0	1	95		412080	411986	2e-44	180
scf270.16	I	7.699	<nnxnp>,(nn,np),np,nn,nn,nn,np,np,np,nn,nn,np,np,np,np,nn,np,nn,nn,nn,np,np,np,np,nn,nn,nn,np,nn,nn,nn,np	TGCAGGGTGCAGAATAGTTTTATTTCCATATATGAATAAAGCCCATTTTTACCTTCAACATTCTAAAATCACGTTATAAGTGTGCTTTCTTCCTT	scaffold_270	100	95	0	0	1	95		1846501	1846407	1e-46	188
scf270.18	I	7.699	<nnxnp>,(nn,np),np,nn,nn,nn,np,np,np,nn,nn,np,np,np,np,nn,np,nn,nn,nn,np,np,np,np,nn,nn,nn,np,nn,nn,nn,np	TGCAGGACGTTAGAAATGTACACTTGGCGTCGGGGCAGGCACTCCGCAGCATGCACTCCGCCCGGGAGACGCACTTCTGCGTGAAGGCACAGTGG	scaffold_270	100	95	0	0	1	95		1619918	1620012	1e-46	188
scf270.19	I	9.122	<nnxnp>,(nn,np),np,nn,nn,nn,np,np,np,nn,nn,np,np,np,np,nn,np,nn,nn,nn,np,np,np,np,nn,nn,nn,np,nn,nn,nn,np	TGCAGGATCACGAGAACCTGCAGCCCGGATACCAGTACTACGTGCCCATCTACCGCAGCCGGTATCAGCCAGCACACGCGCCGGGATGCACGGAA	scaffold_270	100	95	0	0	1	95		441257	441351	1e-46	188
scf270.2	I	9.122	<efxeg>,(ee,ef,eg,fg),fg,ee,ef,ef,eg,eg,fg,ee,ef,eg,fg,fg,fg,ef,eg,ef,ee,ee,eg,eg,fg,fg,ef,--,ee,eg,ef,ef,ef,eg	TGCAGGTTTTATAGTAACCTGGCGATGCTGGTATGCCACTTGAGTCGTTTGTGAGAAATATTACAAATGTAGCGATTTATTATTAAATCCAAATT	scaffold_270	100	95	0	0	1	95		689633	689727	1e-46	188
scf270.4	I	9.122	<hkxhk>,(hh,hk,kk),hk,hk,hh,hh,kk,kk,hk,HK,hh,kk,hk,hk,HK,hh,kk,hh,hk,HK,kk,kk,hk,hk,hh,hh,hk,kk,hh,hh,hh,kk	TGCAGGCTTCCCCACGCCGTGTCAGTTATTTGGCCATACTTCACCACACCGGTCATTCGTTCATTGCTATTTCAAACAAAACATATGTACAGTTT	scaffold_270	98.95	95	1	0	1	95		410439	410533	2e-44	180
scf270.11	I	9.984	<lmxll>,(ll,lm),ll,lm,ll,ll,lm,lm,ll,lm,ll,lm,ll,ll,ll,ll,lm,ll,lm,lm,lm,lm,ll,ll,ll,ll,lm,lm,ll,ll,ll,lm	TGCAGGACACAGCAGCAACAATGAATAATGATGAATAATTATTATGATTTACTAAACCGCAAATTTGCACCTCGAGTGAAGAAGGTTCGACGTCA	scaffold_270	100	95	0	0	1	95		727326	727232	1e-46	188
scf35	I	10.847	<efxeg>,(ee,ef,eg,fg),--,ef,ee,ee,fg,fg,eg,ef,ee,fg,eg,eg,eg,ee,fg,ee,ef,ef,fg,fg,eg,eg,ee,ee,ef,ef,ee,ee,ee,fg	TGCAGGTGTTGCAGGCTCTGGGCCGCGAGGTGGCAGTACAACAATGGATAAATACATCCATCTGTGCGGAGCTTTGAGTGATGATTCGATGTGTG	scaffold_35	98.95	95	1	0	1	95		600431	600337	2e-44	180
scf6075	I	10.847	<nnxnp>,(nn,np),np,nn,nn,nn,np,np,np,nn,nn,np,np,np,np,nn,np,nn,nn,nn,np,np,np,np,nn,nn,nn,nn,nn,nn,nn,np	TGCAGGAGATTTGCTGCTTTCATCGATCGCATCTGTATGTGCCGCTCGGTACGTTTGTGAGAGTGCCCCTATACTTTGTAAGCCTAGGGGCAATT	scaffold_6075	100	95	0	0	1	95		8429	8335	1e-46	188
scf1128	I	14.296	<lmxll>,(ll,lm),ll,lm,ll,ll,lm,ll,ll,lm,ll,lm,ll,ll,ll,ll,lm,ll,lm,lm,lm,lm,ll,ll,ll,ll,lm,lm,ll,ll,ll,lm	TGCAGGGGAGAGTCACGTGACGCTGGTCGCAATGAAAGAGACGCGCACCACGTGACCCTGGTGGGCACGCGCAGGTCGTCGAACGACTCTGAACG	scaffold_1128	98.95	95	1	0	1	95		643110	643204	2e-44	180
scf133.1	I	14.296	<nnxnp>,(nn,np),np,nn,--,nn,np,np,--,nn,nn,--,np,--,np,nn,--,nn,nn,nn,np,--,np,np,nn,np,nn,nn,--,nn,--,np	TGCAGGAGGTGCTCACGGATGCGACTTTGTCCAGATCTTTCAAGGATTTGTGAGTTCCTCACACAATCCAGCCTGGTTAAACCCAGGGTGGATCG	scaffold_133	98.95	95	1	0	1	95		251916	251822	2e-44	180
scf133.2	I	14.296	<nnxnp>,(nn,np),np,nn,nn,nn,np,np,np,nn,nn,np,np,np,np,--,np,nn,nn,nn,np,np,np,np,nn,np,nn,nn,nn,nn,nn,np	TGCAGGTCATGATCTGTCTGCTGGTACATAACCGTCTCGTCACCTATCCTTGCTGTATGTATGTTGAACTTATTTCGCATCGTACGTAGCCAACC	scaffold_133	98.95	95	1	0	1	95		357090	357184	2e-44	180
scf35.1	I	14.296	<hkxhk>,(hh,hk,kk),hk,hk,kk,kk,hh,hk,hk,--,kk,hh,hk,hk,hk,kk,hh,kk,hk,hk,hh,hh,hk,hk,kk,hk,hk,hk,kk,kk,kk,hh	TGCAGGCACTCAACTGGAATTGCAAACAGAGCGGTAACATTGCCCACGACTGCAGTACCCTCCGGAAATATTAGTGAGACTCAACGAGGCTATAA	scaffold_35	98.95	95	1	0	1	95		105431	105337	2e-44	180
scf35.2	I	14.296	<nnxnp>,(nn,np),np,nn,nn,nn,np,np,np,nn,nn,np,np,np,np,nn,np,nn,nn,nn,np,np,np,np,--,np,nn,--,--,nn,nn,np	TGCAGGTCGGCGCGAGACGCGGACGCTCCAGAGAGGCGCCGCCCAGAAGCAGCTCGTGAGGATGACGACGATGAAACGTCATTCAATCGAATGAA	scaffold_35	96.88	96	2	1	1	95		220485	220580	9e-38	159
scf5895.2	I	14.296	<lmxll>,(ll,lm),lm,ll,lm,lm,ll,lm,LM,ll,lm,ll,lm,lm,lm,lm,ll,lm,ll,ll,ll,ll,lm,LM,lm,LM,ll,ll,lm,lm,lm,ll	TGCAGGGAACCTGAAACACTTTCTCATGCTGACTGAAGCACGCAGCCTTGATCTCTCTCACAGCCACACACAAAGACAAAGGCCCCCGTATAGCC	scaffold_5895	98.95	95	0	1	1	95		162640	162547	6e-42	172
scf634.14	I	14.296	<nnxnp>,(nn,np),np,nn,nn,nn,np,np,np,nn,nn,np,np,np,np,nn,np,nn,nn,nn,np,np,np,np,nn,np,nn,nn,nn,nn,nn,np	TGCAGGGACCTGTTTGAGATCATATTACCAGGGCTTAACTTGGAACGCGAACGGTTTGGAATGCTGTATCGGGAATTCTTTTGGCACACCACGAC	scaffold_634	100	95	0	0	1	95		200289	200383	1e-46	188
scf737	I	14.296	<lmxll>,(ll,lm),lm,ll,lm,lm,ll,lm,lm,ll,lm,ll,lm,lm,lm,lm,ll,lm,ll,ll,ll,ll,lm,lm,lm,lm,ll,ll,lm,lm,lm,ll	TGCAGGTGCTGTCATTTGGCTCGTTGCCTATCGATTATGATTGTCGAATCAAAGTAACTAATTTGTTTCCTGGTGAGAAAGCTTCTCCCGAGTCT	scaffold_737	100	95	0	0	1	95		12275	12369	1e-46	188
scf8537	I	14.296	<hkxhk>,(hh,hk,kk),hh,kk,hk,hk,hk,hh,hh,kk,hk,hk,hh,hh,hh,HK,hk,hk,kk,kk,hk,hk,hh,hh,hk,hh,kk,kk,HK,hk,hk,hk	TGCAGGTGAGGCCAGACCGTCGTTCCGTTTTTTGGGAAATCCGGGATTGGGCGGGCTGGTGATCGATGCGGGAGAGGGATGAAGCTTTGCGCTTC	scaffold_8537	98.95	95	1	0	1	95		4228	4322	2e-44	180
scf133	I	16.021	<hkxhk>,(hh,hk,kk),hh,kk,hk,hk,hk,hh,hk,kk,hk,hk,hh,hh,hh,hk,hk,hk,kk,kk,hk,hk,hh,hh,hk,hh,kk,kk,hk,hk,hk,hk	TGCAGGAGGGGCCGTATAAAATCAGGGGTCAAAAATCATTTTTTTGAGCGCAGTCCCCAGTGAGGATCTGCTAGCTTCCTACAGGCCATGGAAAC	scaffold_133	100	95	0	0	1	95		135249	135155	3e-34	147
scf137	I	19.471	<efxeg>,(ee,ef,eg,fg),ef,ee,ef,ee,eg,fg,ef,ee,ef,eg,--,--,fg,ef,eg,ef,ee,ee,eg,eg,fg,fg,ef,--,ee,ee,ef,ef,ef,eg	TGCAGGTGCCAATGTGGCGGTGCTCCGTCTTGTTGAAAAATGAAGTCATCGGAATCTTCATCAAGTTGTGGAAAGAGCCATTTCTGCAGAATTTC	scaffold_137	98.95	95	1	0	1	95		28116	28022	2e-44	180
scf137.1	I	19.471	<lmxll>,(ll,lm),lm,ll,lm,--,ll,lm,lm,ll,lm,ll,lm,lm,lm,lm,ll,lm,ll,ll,ll,ll,lm,lm,lm,lm,ll,ll,lm,lm,lm,ll	TGCAGGGACCTGTTATTAATCATCATATCACAGATTGGGTTGGGTTAGTAAGTGCATTGTAACTAGGAGTCTTCTGTCGTGTACGAACGTGCATA	scaffold_137	100	95	0	0	1	95		132130	132224	1e-46	188
scf7583	I	19.471	<nnxnp>,(nn,np),np,np,np,np,nn,nn,np,np,np,nn,nn,nn,nn,np,nn,np,np,np,nn,nn,nn,nn,np,nn,--,np,np,np,np,--	TGCAGGAGTTGGATGCCTTCCCCAAGCTACCCGAAGGCCTCAGCGAGACATCTGCCCTGGGAGCAGCCGGTACAGCGCACACTCTCTCACGTTCA	scaffold_7583	98.95	95	1	0	1	95		8879	8973	2e-44	180
scf14247	I	22.921	<hkxhk>,(hh,hk,kk),hk,kk,hk,hk,hk,hh,hk,kk,hk,hk,hh,hh,hh,hk,hk,hk,kk,kk,hk,hk,hh,hh,hk,hh,hk,kk,hk,hk,hk,hk	TGCAGGCGGCCTGGCCGTCGTCGTCCCGTCACTGAGGAATACCCCAGCGAGATCGCCAGACACCCCTCACCTTGAGCTGTACGAGCATTCTCCCC	scaffold_14247	98.95	95	1	0	1	95		5800	5894	2e-44	180
scf10916.1	I	24.645	<hkxhk>,(hh,hk,kk),kk,hk,kk,kk,hh,hk,kk,hk,kk,hh,hk,hk,HK,kk,hh,kk,hk,hk,hh,hh,hk,hk,hk,hk,hh,hk,kk,kk,kk,hh	TGCAGGTCACGAACTATGAATCAACATCAAAACTTAATCTCTCACCTGCCCTTCATACCCACAAGAGGAGGTGTGCCATTGTTGTTGTTAGTCAC	scaffold_10916	100	95	0	0	1	95		8472	8566	1e-46	188
scf7307	I	26.37	<hkxhk>,(hh,hk,kk),hh,hk,hh,hh,kk,hk,hh,HK,hh,kk,hk,HK,hk,hh,kk,hh,hk,kk,kk,kk,hk,hk,hk,hk,kk,hk,hh,hh,hh,kk	TGCAGGGACCTGTTTAGGTATCGCCCTGTGAGCCATGCGGCTCTTAAGTCGGGTGCAACCGCAACAAACAAAATATGAATCTACATTGCAGAAAA	scaffold_7307	100	95	0	0	1	95		13632	13538	1e-46	188
scf5895.1	I	27.233	<lmxll>,(ll,lm),lm,ll,lm,lm,ll,lm,lm,ll,lm,ll,lm,lm,lm,lm,ll,lm,ll,ll,ll,ll,lm,lm,lm,lm,ll,ll,lm,lm,lm,ll	TGCAGGGTGACGGGTAGAGACAGAGGGCAGCTACTTTGGTCTCTTATCCACACTCCGTTGTGTACCTTCTCACGGTGGCGAGATATTAACTACCT	scaffold_5895	100	95	0	0	1	95		161788	161694	1e-46	188
scf10916	I	28.095	<hkxhk>,(hh,hk,kk),hh,hk,hh,hh,kk,hk,hh,hk,hh,kk,hk,hk,hk,hh,kk,hh,hk,hk,kk,kk,hk,hk,hk,--,kk,hk,hh,hh,hh,kk	TGCAGGTTCTGAGAAAAATACCAGTTTGTCAACACGCATGACGAAATAAAATGAACAAAAAATACAATTGCACGGCTTCTGGAAGAGCAAGACGA	scaffold_10916	100	95	0	0	1	95		8475	8381	1e-46	188
scf1128.1	I	28.095	<nnxnp>,(nn,np),nn,nn,nn,nn,np,np,nn,nn,nn,np,np,np,np,nn,np,nn,nn,nn,np,np,np,np,np,np,np,nn,nn,nn,nn,np	TGCAGGGCTGCCGCAAGGGAGCAGCCGAGTCGAGACGGCGCTGACGGACAGGTGGCAGCGAGCACGTGGGCGACGAGGGCGGGGAAGTATGGTCA	scaffold_1128	98.95	95	1	0	1	95		643113	643019	2e-44	180
scf5895	I	32.844	<lmxll>,(ll,lm),lm,ll,lm,lm,ll,lm,lm,ll,lm,ll,lm,lm,lm,ll,ll,lm,ll,ll,ll,ll,lm,--,lm,lm,ll,ll,ll,lm,lm,ll	TGCAGGTGCGGGCGATGACGCATTGCTCCGGGCCGCCCCAGAGGCGCGCCCCGAGGGCTGCGTTGGCGTTGCCCGGCTTCAGGTTGGTGCCAGGA	scaffold_5895	98.95	95	1	0	1	95		147932	147838	2e-44	180
scf9751	I	35.122	<hkxhk>,(hh,hk,kk),hk,hh,hk,hk,hk,kk,hk,hh,hk,hh,kk,kk,kk,hh,hk,hk,hh,hh,hk,hk,kk,kk,kk,kk,hk,hh,hk,hk,hk,hk	TGCAGGCTGACAACATGGGGGGCACACACCTGGGACAGGTAACTCGGGGACACGCCGGGACACTGACGGAGACACAGACACAAGGGAAGGGGGAC	scaffold_9751	100	95	0	0	1	95		6634	6728	1e-46	188
scf12530	I	40.443	<hkxhk>,(hh,hk,kk),hk,hh,hk,hk,hk,kk,hk,hh,hk,hh,kk,kk,hk,hk,hk,hk,hh,hk,hk,hk,kk,kk,kk,kk,hk,hh,hk,hk,hk,hk	TGCAGGATGTGTGATGGGCCCCAGGTGACGCTCGGGTCTCCGCCCAGGAGGCCTACTTGTTTACTCGCCTAAACATTTATTTTGTTACCAGGTAA	scaffold_12530	98.95	95	1	0	1	95		9693	9599	2e-44	180
scf1680	I	40.443	<hkxhk>,(hh,hk,kk),hk,hh,hk,hk,hk,kk,hk,hh,hk,hh,kk,kk,hk,hk,hk,hk,hh,hk,hk,hk,kk,kk,kk,kk,hk,hh,hk,hk,hk,hk	TGCAGGAATTGTGTTTGGGGAGCGGTCGTGTAGTGGTTAGCGCGCTGCGGTTACGAACACGACGGGCCCGAGTTCGATTTGCCGCTCACGGGCCA	scaffold_1680	98.95	95	1	0	1	95		24626	24532	2e-44	180
3955	I	42.168	<efxeg>,(ee,ef,eg,fg),eg,fg,eg,eg,ef,ee,eg,fg,eg,fg,ef,ee,eg,eg,ef,eg,fg,ef,ef,ef,ee,ee,ee,ee,--,fg,eg,eg,eg,ef	TGCAGGAGCGTCCGAACCTCTGACGTGCCAACAGATGTGCTCCCGGATTTCCGGATTTGCGATATGGCACGCGCACGCCAGTGTGTGTGCGTGCC
scf2288	I	42.168	<lmxll>,(ll,lm),ll,lm,ll,ll,lm,ll,ll,lm,ll,lm,lm,ll,ll,ll,lm,ll,lm,lm,lm,lm,ll,ll,ll,ll,lm,lm,ll,ll,ll,lm	TGCAGGTCCATGATCGCCTACGCACAGTTTGCACCGATTTATTTTGCTTTTGCCACAGGGATATAAACGTGAATGCATCTTCATGCTCAAACTCA	scaffold_2288	96.84	95	3	0	1	95		33217	33123	1e-39	165
scf2766	I	43.957	<lmxll>,(ll,lm),ll,lm,ll,ll,lm,ll,ll,lm,ll,lm,lm,ll,ll,--,lm,--,lm,lm,lm,lm,ll,--,ll,ll,lm,lm,ll,ll,ll,lm	TGCAGGTGCTGCCTCTCCTCGTCCGACGTGGCCGCGCTGAATGCACGCACGCGCACAGGCGAAAATGTGCAGGTATACGCGCGCACAGGAACGCG	scaffold_2766	97.89	95	2	0	1	95		21629	21535	6e-42	172
scf2919.1	I	43.957	<lmxll>,(ll,lm),ll,lm,ll,ll,lm,ll,ll,lm,ll,lm,lm,ll,ll,ll,lm,ll,lm,lm,lm,lm,ll,ll,ll,ll,lm,lm,ll,ll,ll,lm	TGCAGGCACAACATCGGCCCATTCGGATGCAAGAGCACAACAGCCGCCTTTCACCACGAAGCGACGTCACCACAGCACATGTGCAAGGCTAGGTG	scaffold_2919	100	95	0	0	1	95		13280	13186	1e-46	188
scf577	I	43.957	<lmxll>,(ll,lm),ll,lm,ll,ll,lm,ll,ll,lm,ll,lm,lm,ll,ll,ll,lm,ll,lm,lm,lm,lm,ll,ll,ll,ll,lm,lm,--,ll,ll,lm	TGCAGGAGATCCCGTGGCATCACCGACTCCTCCACCGCCTCCATCTCCACCAACGCCTCCCCTACCTCCTCTGCTCGCCTCCCTGGAGCTTGGCG	scaffold_577	98.95	95	1	0	1	95		24724	24818	2e-44	180
scf1142	I	45.745	<hkxhk>,(hh,hk,kk),HK,hk,hk,hk,hk,kk,hk,hh,hk,hh,HK,kk,hk,hk,hk,HK,hk,hk,hk,hk,kk,kk,kk,kk,HK,hh,HK,hk,hk,hk	TGCAGGCACCGCCGCAGCCTCGGAGTCCTCCCCTTGAAAATCCAGGCAGAACTCGATGAGCGGCTCCGAGCCTCGCCAGCGCAGGCGAACTCCCT	scaffold_1142	100	95	0	0	1	95		181261	181167	1e-46	188
scf1142.1	I	45.745	<hkxhk>,(hh,hk,kk),hk,hk,hk,hk,hk,kk,hk,hh,hk,hh,hk,kk,hk,hk,hk,hk,hk,hk,hk,hk,kk,kk,kk,kk,hk,hh,hk,hk,hk,hk	TGCAGGAGTCGAGGGAGCCCCCGGCGGCGGCCAGGAGGCCCGGGCGATCGAGGGAGCGGAAGAGTCGTGTGGAGCCCTCAATCCGGTCGTGCCAT	scaffold_1142	97.89	95	2	0	1	95		181258	181352	6e-42	172
scf1582	I	45.745	<lmxll>,(ll,lm),ll,lm,ll,ll,lm,ll,ll,lm,ll,LM,lm,ll,ll,ll,lm,ll,lm,lm,lm,lm,ll,ll,ll,ll,lm,lm,ll,ll,ll,lm	TGCAGGTGAGTGGTACAGGGATGACGTTGCAAATTATTTTCCATTTATATGTGTGTGCATTCCTGCATGTGTGTAATTTTGCGTGCACGTGTGAC	scaffold_1582	100	95	0	0	1	95		27048	27142	1e-46	188
scf2899.1	I	45.745	<lmxll>,(ll,lm),ll,lm,ll,ll,lm,ll,--,lm,ll,lm,lm,ll,ll,ll,lm,ll,lm,lm,lm,lm,ll,ll,ll,ll,lm,lm,ll,ll,ll,lm	TGCAGGGACGTTGCCTTTAACAACAAAGTTTGCAATTTTGTTGTTGCTGCGATTCCCCCGGTGGCCTGAGTGGGAACAGGCATCTCGCTTTCTAA	scaffold_2899	96.84	95	3	0	1	95		19563	19469	1e-39	165
scf2899.2	I	45.745	<lmxll>,(ll,lm),lm,ll,lm,lm,ll,lm,lm,ll,lm,ll,ll,lm,lm,lm,ll,lm,ll,ll,ll,ll,lm,lm,lm,lm,ll,ll,lm,lm,lm,ll	TGCAGGGCTGTGATAAATATATCGGGACCCAGGAGGCACACGTGTTTAGTGCCTGTACCACCACCCTTTTACACTCCCTGTACAAGACAGACATG	scaffold_2899	98.95	95	1	0	1	95		19560	19654	2e-44	180
scf2919	I	45.745	<lmxll>,(ll,lm),ll,lm,ll,ll,lm,ll,ll,lm,ll,lm,lm,ll,ll,ll,lm,ll,lm,lm,lm,--,ll,ll,ll,ll,lm,lm,ll,ll,ll,lm	TGCAGGAGACTAAAGATAACCCTTCACAATAAAACGTAAAATAACGTTTAAACAATAAAGTACACTTAAATACATGAGGGTGAAATGACGATGCG	scaffold_2919	97.89	95	2	0	1	95		17115	17209	6e-42	172
scf3546	I	45.745	<lmxll>,(ll,lm),lm,ll,lm,lm,ll,lm,lm,ll,lm,ll,ll,lm,lm,lm,ll,lm,ll,ll,ll,ll,lm,lm,lm,lm,ll,ll,lm,lm,lm,ll	TGCAGGAGGCCATGTACCACAGCGCCGAGCATGGACACCTGGACGTCACCATGGAGCTGCGCGGCAAGGGTAAGGATCATCCTCGTAGCTGTGGC	scaffold_3546	98.95	95	1	0	1	95		6023	6117	2e-44	180
scf4336	I	45.745	<lmxll>,(ll,lm),ll,lm,ll,ll,lm,ll,ll,lm,ll,lm,lm,ll,ll,ll,lm,ll,lm,lm,lm,lm,ll,ll,ll,ll,lm,lm,ll,ll,ll,lm	TGCAGGTACTGTATTCACTTATCTTAATACTAGCATCACAATCCTGAAACGCCCCACAAGTATAATCACATTGCCAGTAATTGATGATAAGTAAG	scaffold_4336	100	95	0	0	1	95		14101	14007	1e-46	188
scf7272	I	45.745	<lmxll>,(ll,lm),ll,lm,ll,ll,lm,ll,ll,lm,ll,lm,lm,ll,ll,ll,lm,ll,lm,lm,lm,lm,ll,ll,ll,ll,lm,lm,ll,ll,ll,lm	TGCAGGTGATTATACTAAAACACCTCAAAATATGCATAGGCATGGGATTATGTAACCCTTTTCAATATTCTTTTGTCTTCGGAAGTATAAAATTA	scaffold_7272	98.9	91	1	0	5	95		7542	7452	6e-42	172
scf1141	I	47.47	<hkxhk>,(hh,hk,kk),kk,hh,kk,kk,hh,hk,kk,hk,kk,hk,hh,hk,kk,kk,hh,kk,hh,hh,hh,hh,hk,kk,hk,hk,hh,hk,kk,kk,kk,hh	TGCAGGAAATAACACATTCCGCACTTAATTCCAAGTGCCTGAACGCTGCACGCGTGTGTTTTTTTCTTCGACGAAGCTACCCGCGTGTGGCAGCT	scaffold_1141	100	95	0	0	1	95		15656	15750	3e-34	147
scf7651.2	I	47.47	<nnxnp>,(nn,np),nn,np,nn,nn,np,np,nn,nn,nn,nn,np,NP,nn,nn,np,nn,np,np,np,np,np,nn,np,np,np,nn,nn,nn,nn,np	TGCAGGCCTTGCGATGAAGAACGCTGCTTTACAACTGCGGTTGTAAGTGTTGATCCACGAGCACCGTCCATCTGTGGTGCCACGACCGTGGAGCC	scaffold_7651	100	95	0	0	1	95		15866	15772	1e-46	188
scf989	I	48.937	<lmxll>,(ll,lm),ll,lm,ll,ll,lm,ll,ll,lm,ll,lm,lm,ll,ll,ll,lm,ll,lm,lm,lm,--,ll,ll,ll,ll,lm,lm,ll,ll,--,lm	TGCAGGTGCTGGAGGCGCGGGTGGAGGAGCGTAACCTGGAGCACTGGCTCAACCCGCACTGCCTGCCGCACTGCAACCGCAACTACGTACACCCG	scaffold_989	100	95	0	0	1	95		16347	16253	1e-46	188
scf498	I	50.891	<lmxll>,(ll,lm),--,lm,ll,ll,lm,ll,ll,lm,ll,lm,lm,ll,ll,ll,lm,ll,lm,lm,lm,lm,ll,ll,ll,ll,lm,lm,ll,ll,lm,lm	TGCAGGTGCTGCAGCTGTTCCTCCTCGCTGTCGTGCGACCCCCCTGGGGCTGCGCTCGAGCGGTCGATGGGAACGCCCGCGGTCGTGGGCAAGCT	scaffold_498	100	95	0	0	1	95		78311	78217	1e-46	188
scf7651	I	50.891	<efxeg>,(ee,ef,eg,fg),ee,fg,ee,ee,fg,eg,ee,EF,ee,ef,--,eg,ee,ee,fg,ee,fg,fg,--,fg,eg,ee,eg,--,fg,ef,ee,ee,fg,fg	TGCAGGCGATTATTTTAACGAGCGCTCGTCCTGCAGCTCTGCCCTCACTCTCGCCGCGCGTCCGCCCACGCAGCCGCTCCACACAAAGACTAACG	scaffold_7651	98.92	93	1	0	1	93		15270	15362	4e-43	176
scf7651.1	I	50.891	<lmxll>,(ll,lm),ll,lm,ll,ll,lm,ll,ll,lm,ll,lm,lm,ll,ll,ll,lm,ll,lm,lm,lm,lm,ll,ll,ll,ll,lm,lm,ll,ll,lm,lm	TGCAGGCCCACGTCTGAGTTCACGAGACGCCCATCGTCCAGGACCTGCGTGGCCAGTTACATGCAATGCCTCGAGTGGAAATCTCCCCTGGCTTG	scaffold_7651	96.88	96	2	1	1	95		18974	18879	9e-38	159
scf1579.2	I	53.51	<lmxll>,(ll,lm),lm,ll,lm,lm,ll,--,lm,ll,lm,ll,ll,--,lm,lm,ll,lm,ll,--,ll,ll,--,lm,--,--,ll,lm,lm,lm,ll,ll	TGCAGGACAGCTGATCTGCATGGATTGCACGACTGATGACAAATAACATGAACAGGTTTTCGTAGGGAGGTATAGAACACAGACAATTTGGACCA	scaffold_1579	98.95	95	1	0	1	95		115375	115281	2e-44	180
scf5289	I	53.51	<lmxll>,(ll,lm),ll,lm,ll,ll,lm,ll,ll,LM,ll,lm,lm,ll,ll,ll,LM,ll,lm,lm,LM,lm,ll,ll,ll,ll,lm,ll,ll,ll,lm,lm	TGCAGGTCGACCCTAGCACCGGCCGTTTTAATGGCCAGTACAAGACCTATGCCATCTGCGGACCCATCCGGAGGATGGTAAAAAGATCCCGTCCT	scaffold_5289	98.95	95	1	0	1	95		5592	5686	2e-44	180
scf5289.1	I	53.51	<lmxll>,(ll,lm),ll,lm,ll,ll,lm,ll,ll,lm,ll,lm,lm,ll,ll,ll,lm,ll,lm,lm,lm,lm,ll,ll,ll,ll,lm,ll,ll,--,lm,lm	TGCAGGTGTGGTGGCTCAACATAAACGTGGATGAGATGAAACCGTCAGTCTGGAATATCGAGTTATCAGCGTGGGTGGAGTTAATCAAGGAAGTG	scaffold_5289	100	95	0	0	1	95		6176	6270	1e-46	188
scf1579.1	I	56.129	<lmxll>,(ll,lm),ll,lm,ll,ll,lm,ll,ll,lm,ll,lm,lm,ll,ll,ll,lm,ll,lm,ll,lm,lm,ll,ll,ll,ll,lm,ll,ll,ll,lm,lm	TGCAGGGGCAATAACATTGCTTAAAAGCTAGTACATGAAGTAGGTCTCCCAAAGGCTATCTGTGCCGGATTGTGTGTGTTTTACCTTTGCGTACC	scaffold_1579	98.95	95	1	0	1	95		162297	162391	2e-44	180
scf1330.1	I	58.748	<lmxll>,(ll,lm),ll,lm,ll,ll,ll,ll,ll,lm,--,lm,lm,ll,ll,ll,--,ll,lm,ll,lm,lm,ll,ll,ll,ll,lm,ll,ll,ll,lm,lm	TGCAGGGCTACTAGGTCAGCTTAAGGTGGCAGGACAGCAAGTAGGTTGTGACCCACCTGCGCGGAATGTTCAAGTGTGGGGTTCTACCCTGGGCA	scaffold_1330	100	95	0	0	1	95		49146	49240	1e-46	188
scf1330	I	61.368	<lmxll>,(ll,lm),lm,--,lm,lm,ll,lm,lm,ll,lm,ll,ll,lm,lm,lm,--,lm,ll,lm,ll,--,lm,lm,lm,lm,ll,lm,lm,lm,ll,ll	TGCAGGTCGTTATCATCGCAGCGGACGACGCGGACATGTGTTCCTTGCGGGCAGCAAGGAACATACACGCACATCTGCTGTCACAATGCTGACCA	scaffold_1330	100	95	0	0	1	95		161109	161203	1e-46	188
scf1579	I	61.368	<efxeg>,(ee,ef,eg,fg),ee,fg,ee,ee,fg,eg,ee,ef,ee,ef,fg,eg,ee,ee,fg,ee,--,eg,fg,ef,eg,ee,eg,eg,fg,ee,ee,ee,ef,fg	TGCAGGGACCTGTTATCAGTTCTCTTTGCCTCCCGAGTCGTGCGAACGACGTGTGCCTCGTGACTTCTCATCCCAATAACGGAGCATTATTTGCC	scaffold_1579	100	95	0	0	1	95		125584	125678	1e-46	188
scf1579.3	I	63.092	<nnxnp>,(nn,np),nn,np,nn,nn,np,np,nn,nn,nn,nn,np,np,nn,nn,np,nn,np,NP,np,nn,np,nn,np,np,np,nn,nn,nn,nn,np	TGCAGGTTAAAAGCCTACGGCTCGCACACAGCCTGAGCGTAGCAATTGAGCACGTTGAGATTCATTTACACCTTCATTGCACTTGTCTCTGAATG	scaffold_1579	100	95	0	0	1	95		119307	119213	1e-46	188
scf2454	I	63.092	<hkxhk>,(hh,hk,kk),hk,hk,HK,hk,hk,hh,hk,kk,hk,kk,hk,hh,hk,hk,hk,hk,hk,hh,hk,kk,hh,kk,hh,hh,hk,hk,hk,hk,kk,hk	TGCAGGGATCTGTTCTACGTGACTTTACCGAATAAAACCATAGAGTATGAATCCTTGCAGTCACGAAAGCTTCAAATCTAGAATTCATGACCATA	scaffold_2454	98.95	95	1	0	1	95		660	754	2e-44	180
scf3097	I	63.092	<hkxhk>,(hh,hk,kk),hk,hk,hk,hk,hk,kk,hk,hh,hk,hh,hk,kk,hk,hk,hk,hk,hk,kk,hk,hh,kk,hh,kk,kk,hk,hk,hk,hk,hh,hk	TGCAGGACTTCTCGTTCCTTGTTATGTACCGCAAGGGTTCTCTCCATATGAACGCCGATGCTCTGTCGCGATTACCAACAACCGGAGGTTGTGCA	scaffold_3097	96.84	95	3	0	1	95		13509	13603	1e-39	165
scf3097.1	I	63.092	<lmxll>,(ll,lm),ll,LM,ll,ll,lm,ll,ll,lm,ll,lm,lm,ll,ll,ll,lm,ll,lm,ll,lm,lm,ll,lm,ll,ll,lm,ll,ll,ll,lm,lm	TGCAGGTATGCATGTGTGCACTTCACATGTACATTAGTGCATGCCAGGTGTGCAATCTTGCACGTGTGTACCATACGCGTGCGTGTACATCCGTA	scaffold_3097	98.95	95	1	0	1	95		20250	20156	2e-44	180
scf4255	I	63.092	<hkxhk>,(hh,hk,kk),hk,HK,hk,hk,hk,kk,hk,hh,hk,hh,hk,kk,hk,hk,hk,hk,--,kk,hk,hh,kk,hh,kk,kk,hk,hk,hk,--,hh,hk	TGCAGGGCCTCTGCAATCCCACACACCCGCGGCATGACACACACGCCTCGCTTTGCTGACGAAACAAGTGCACCTCACGACGGCAACCATGGGTG	scaffold_4255	100	95	0	0	1	95		24269	24175	1e-46	188
scf7653	I	63.092	<hkxhk>,(hh,hk,kk),hk,hk,hk,hk,hk,hh,hk,kk,hk,kk,hk,hh,hk,hk,hk,hk,hk,hh,hk,kk,hh,kk,hh,hh,hk,hk,hk,hk,kk,hk	TGCAGGCAACATCTGACTGTGGCAGGCTCTTAGAGTGGTCCATTGAGCTATTGCCCGCGGGGACATCGATACAGATTAGTGAAATGAAAGCGAGA	scaffold_7653	98.95	95	1	0	1	95		3095	3189	2e-44	180
scf963	I	64.817	<efxeg>,(ee,ef,eg,fg),fg,ee,fg,fg,ee,ef,eg,eg,fg,eg,ee,ef,fg,fg,ee,fg,ee,ef,ee,--,ef,eg,ef,ef,--,fg,fg,fg,eg,ee	TGCAGGATGAAGAAGACGTCCCCCACACGTGTGTATGTATGTTGAGCTTCTTTCACACCGTACATAGCCAACCATGCGAACCGGAGGTGCGGGGG	scaffold_963	98.95	95	1	0	1	95		659	565	2e-44	180
scf963.1	I	64.817	<lmxll>,(ll,lm),lm,ll,lm,lm,ll,lm,ll,ll,lm,ll,ll,lm,lm,lm,ll,lm,ll,lm,ll,ll,lm,ll,lm,lm,ll,lm,lm,lm,ll,ll	TGCAGGCGAATGCCTCGGACGCACGTCGCCGCGAGTTGAAGACGAGACGCGAGTCGACGTGTCGACGCGTCGTTTGAGCCCAGGTTTCAATTTCA	scaffold_963	98.95	95	1	0	1	95		170079	170173	2e-44	180
scf20143.1	I	68.433	<hkxhk>,(hh,hk,kk),--,kk,hh,hh,kk,kk,hk,hh,hh,HK,kk,hk,hh,hh,kk,hh,kk,HK,kk,hk,hk,hk,hk,--,kk,hh,hh,hh,hk,kk	TGCAGGAAACAGCTTCACCATCATCCTCATGATAATTGTGATTAGCAGTAACAGAATTGCCGCCATCATGATCAGTGGCATTATCATCATGATCA	scaffold_20143	98.95	95	1	0	1	95		3559	3465	2e-44	180
scf20143	I	74.053	<hkxhk>,(hh,hk,kk),hh,kk,hh,hh,kk,hk,hk,hk,hh,hk,kk,hk,hh,hh,kk,hh,kk,hk,kk,hk,hk,hk,hk,hk,HK,hh,hh,hh,HK,kk	TGCAGGTTATGACGCTACTACTACCGCTGATAATGATGATTATGATGATCATGACGATGGGTCTGCTGATGATTCTAATACCGCTGATCACGACG	scaffold_20143	97.89	95	2	0	1	95		3556	3650	6e-42	172
scf3052	I	74.053	<nnxnp>,(nn,np),nn,np,nn,nn,np,np,nn,nn,nn,nn,np,np,nn,nn,np,nn,np,np,np,nn,np,nn,np,np,np,nn,nn,nn,nn,np	TGCAGGGACCTGTTACCTACCACGCATCAGCCATGATACATTCACTGCTGGTGAAAGGCGTCCGCAAGCCATTGCTGTATGTTGAACTTCTTCCT	scaffold_3052	100	95	0	0	1	95		157308	157214	1e-46	188
scf13.3	I	76.94	<nnxnp>,(nn,np),np,nn,np,np,nn,nn,np,np,np,np,nn,nn,np,np,nn,np,nn,nn,nn,np,nn,np,np,nn,nn,np,np,np,np,nn	TGCAGGCTCAAACATCACTGTCGGATTTATGGACAAAAAAACTCGCCAGTTTTATTTTTAACTTGAGCACCTGTGCAGCAGCAAAGAAAAGCATG	scaffold_13	100	95	0	0	1	95		562173	562267	3e-34	147
scf536	I	76.94	<nnxnp>,(nn,np),np,nn,np,np,nn,nn,np,np,np,np,nn,nn,np,np,nn,np,nn,nn,nn,np,nn,np,np,nn,nn,np,np,np,np,nn	TGCAGGTGGAGCCCATAGCCACTTCTCGTTGCGCAAGGTGTGAGTGAGTCTGTGCCCAGATAAGGCGTTAAGAGGTGTGCAACGTTTATTGTGCG	scaffold_536	100	95	0	0	1	95		83825	83731	1e-46	188
scf13	I	82.943	<efxeg>,(ee,ef,eg,fg),fg,ee,fg,fg,ee,ef,ee,--,fg,ee,ee,ef,fg,fg,ef,fg,ee,ef,ee,eg,ef,eg,fg,ef,ee,fg,fg,fg,eg,ee	TGCAGGTCAATGAGGAATGATTGAGCACAGGTCAAATCACTTAGAAGTACACCTTCCCCCATGTAATCAGCGAGCTTCGTTGATGACTCAAGGGC	scaffold_13	97.89	95	2	0	1	95		562176	562082	6e-42	172
scf398	I	82.943	<lmxll>,(ll,lm),--,ll,--,--,ll,lm,ll,ll,--,ll,ll,lm,--,--,lm,--,ll,lm,ll,ll,lm,ll,lm,lm,ll,--,--,--,ll,ll	TGCAGGAATAGTAAATGTAAATTAGAAAACCAACCTCTGTCATATGTATTGACAAACAATTAAACAGTTCTCTTAGTTAATGTGGAAATATGGGA	scaffold_398	97.89	95	2	0	1	95		108963	108869	6e-42	172
scf13.1	I	85.053	<lmxll>,(ll,lm),lm,ll,lm,lm,ll,lm,ll,ll,lm,ll,ll,lm,lm,lm,lm,lm,ll,lm,ll,ll,lm,ll,lm,lm,ll,lm,LM,lm,ll,ll	TGCAGGATGCGTGTGTGCGAAACGTTGAACATGACGACGAACAATACGCAGTACAACTCGAAAAAAGCATTGGAGTACTGTACAGCACAACAGCA	scaffold_13	98.95	95	1	0	1	95		568447	568353	2e-44	180
scf536.1	I	86.53	<nnxnp>,(nn,np),np,nn,np,np,nn,nn,np,np,np,np,nn,nn,np,np,nn,np,nn,nn,nn,np,nn,np,np,nn,nn,np,np,np,np,nn	TGCAGGATTTATACTTCACTGGCTCCCCGTTGTCCTACAGGTGGTTGTCTCACACACAACTTATCTCAATCCCTTTTGTCATCCACCACTTTTGA	scaffold_536	97.89	95	2	0	1	95		35742	35648	6e-42	172
scf3562	I	87.163	<hkxhk>,(hh,hk,kk),kk,hh,kk,kk,hh,hk,hk,hk,kk,hk,hh,hk,kk,kk,hk,kk,--,hk,--,hk,hk,hk,kk,hk,hh,kk,kk,kk,hk,hh	TGCAGGGACCTGTTTTAATTAGACTTTCTCCCAGCAGGATAAATGAGAACCACCTCCTTGTTTGTAGACGTTGGCGGTTCGATCCAGTGGCCGCC	scaffold_3562	100	95	0	0	1	95		26440	26346	1e-46	188
scf97	I	87.163	<lmxll>,(ll,lm),lm,ll,lm,lm,ll,lm,ll,ll,lm,ll,ll,lm,lm,lm,lm,lm,ll,lm,ll,ll,lm,ll,lm,lm,ll,lm,lm,lm,ll,ll	TGCAGGAGCTGGCGATGCCCTGTTTGGTGGTTACTCATCCAAGCACTCAATCCTGCTGCCTAACTTCTGAGATGTGACGAGATCAGGTGCATTCT	scaffold_97	100	95	0	0	1	95		228245	228151	1e-46	188
scf233.1	I	107.281	<efxeg>,(ee,ef,eg,fg),fg,ef,fg,fg,ee,ef,eg,eg,eg,eg,ee,ef,eg,fg,ef,--,eg,ef,ef,eg,ef,eg,eg,ee,ef,fg,fg,fg,eg,--	TGCAGGTGGGAATCGTGTCTCATTTATTTGGATGATATAATTGTGTTCAGCCACACTTTTGACGAGCATCTCCAGCGGCTGCGATGTTTTTGTTC	scaffold_233	98.95	95	1	0	1	95		463662	463756	2e-44	180
39544	I	109.005	<efxeg>,(ee,ef,eg,fg),fg,ef,fg,fg,ee,ef,eg,eg,eg,eg,eg,ef,eg,fg,ef,eg,eg,ef,ef,eg,ef,eg,eg,ee,--,fg,fg,fg,eg,ee	TGCAGGCGTCACGCGGACGCTGAGGACGGCTGGCTTCGTTCCGCCGCTCCAGAAGGACTCTGCCGATTTTTGCTCCTGCTCCCCCCCTTTATGTT
scf115.1	I	109.005	<nnxnp>,(nn,np),np,nn,np,np,nn,nn,np,np,np,np,np,nn,np,np,nn,np,np,nn,nn,np,nn,np,np,nn,nn,np,np,np,np,nn	TGCAGGCAGCCTTAAAAGAGTCGCGTGTGTGTATGTGTGAATACACAGTGTATACCCATGCTGTATATGAAGCCGGTATGCCTTTGTGAAATTTG	scaffold_115	100	95	0	0	1	95		53033	53127	1e-46	188
scf115.2	I	109.005	<nnxnp>,(nn,np),np,nn,np,np,nn,nn,np,np,np,np,np,nn,np,np,nn,np,np,nn,nn,np,nn,np,np,nn,nn,np,np,np,np,nn	TGCAGGGACGGAGCACATTTTAGCTGCTCTTCAGGTCACTGCTCTTTCCAGTCAGATGCACACTTGTCTGCCGGTCTCGTCACCTGCCTTGGAGC	scaffold_115	100	95	0	0	1	95		53036	52942	1e-46	188
scf2162	I	109.005	<nnxnp>,(nn,np),NP,nn,np,np,nn,nn,np,np,--,np,np,nn,np,np,nn,np,np,nn,nn,np,nn,np,np,nn,nn,np,np,np,np,nn	TGCAGGAAAGTGGTCACATGCTTGGCCATGTTTGTTTGTTGTAGTATGGAGTTAGACTGATGGCCTTAATCTTGACTTGCATCCCACTGGGATTT	scaffold_2162	100	95	0	0	1	95		42549	42455	1e-46	188
scf233.5	I	109.005	<nnxnp>,(nn,np),nn,np,nn,nn,np,np,nn,nn,nn,nn,nn,np,nn,nn,np,nn,nn,np,np,nn,np,nn,nn,np,np,nn,nn,nn,nn,np	TGCAGGAATCACAATTCGTCTATGGGCGATTCCATGTAAAATTTACATTCACTTGAATATTGTTACAAGACTTCATCACCCTGAATGCAGTAGTC	scaffold_233	100	95	0	0	1	95		334343	334249	1e-46	188
scf233.6	I	109.005	<nnxnp>,(nn,np),nn,np,nn,nn,np,np,nn,nn,nn,nn,nn,np,nn,nn,np,nn,nn,np,np,nn,np,nn,nn,np,np,nn,nn,nn,nn,np	TGCAGGAATTGCCCAGTTCAAGTTATGCTAATGGAGTATAGCATTAAGTGCTGTTCTATGACTGTTAGTTATCTTGTGTGGGTGGAGCGGTGGTG	scaffold_233	100	95	0	0	1	95		334340	334434	1e-46	188
scf393	I	109.005	<efxeg>,(ee,ef,eg,fg),fg,ef,fg,fg,ee,ef,eg,eg,eg,eg,eg,ef,eg,fg,ef,eg,eg,ef,ef,eg,ef,eg,eg,ee,ef,fg,fg,fg,eg,ee	TGCAGGGGCGCGCGCATGCTCGCCACCGCGTTAGCCTCAGGGGTGGTGTTTACGAGTGAGTGAGGACTAACCCTGTACGGCGGTAAGCCAGTGGT	scaffold_393	98.95	95	1	0	1	95		24208	24114	2e-44	180
scf393.1	I	109.005	<lmxll>,(ll,lm),lm,lm,lm,lm,ll,lm,ll,ll,ll,ll,ll,lm,ll,lm,lm,ll,ll,lm,lm,ll,lm,ll,ll,ll,lm,lm,lm,lm,ll,ll	TGCAGGCTGTGGGGCTATGCGTTGGACAGTAGAGGGTGGTACAGCAAAATATTGCATTCTACTTTACCTTTATGCTGCCATGTCTGTGCTCCCCA	scaffold_393	100	95	0	0	1	95		73587	73681	1e-46	188
scf393.3	I	109.005	<nnxnp>,(nn,np),np,nn,np,np,nn,nn,np,np,np,np,np,nn,np,np,nn,np,np,nn,nn,np,nn,np,np,nn,nn,np,np,np,np,nn	TGCAGGCGGTTACGCCCTACCACGCGCACACACCATCGCTAATGCTAAAGTGGCCGCGCGAACGCGCGCGCTCTTTCTGGCGATTATATTCCAAT	scaffold_393	100	95	0	0	1	95		24205	24299	1e-46	188
scf8734	I	109.005	<abxcd>,(ac,ad,bc,bd),ad,ac,ad,ad,bc,ac,bd,bd,bd,bd,bd,ac,bd,ad,ac,bd,bd,ac,ac,bd,ac,bd,bd,bc,--,ad,ad,ad,bd,--	TGCAGGAGAGTGGACGTCGTGCCCTTGAGCAGCAACGCCTCTCACTGTCCCACCAGGAAGCTGAGAAGCTCATGCTCACTGTCTATCTCCAAAAC	scaffold_8734	97.89	95	2	0	1	95		38108	38014	6e-42	172
scf8734.2	I	109.005	<lmxll>,(ll,lm),lm,lm,lm,lm,ll,lm,ll,ll,ll,ll,ll,lm,ll,lm,lm,ll,ll,lm,lm,ll,lm,ll,ll,ll,lm,lm,lm,lm,ll,ll	TGCAGGCCGAGTTGGATCAACGAGATGCAACCATTGTGGTTAGTGCCGCAAGTTCTGTATGTAAGCTCCCATTCCTTGCGTGAGTACCCACACTG	scaffold_8734	98.95	95	1	0	1	95		38743	38649	2e-44	180
scf8734.4	I	109.005	<lmxll>,(ll,lm),lm,lm,lm,lm,ll,lm,ll,ll,ll,ll,ll,lm,ll,lm,lm,ll,ll,lm,lm,ll,lm,ll,ll,ll,lm,--,lm,lm,ll,ll	TGCAGGATCTCCACCACGTGTGTGCGCGCCGCCAGCACCTCCTCCTTCTCGTGCAGGTTCTGCTTCAGAGACTTCAGCAGCTGCGCCCCGACACA	scaffold_8734	98.95	95	1	0	1	95		38740	38834	2e-44	180
scf91	I	109.005	<hkxhk>,(hh,hk,kk),kk,hk,kk,kk,hh,hk,hk,hk,hk,hk,hk,hk,hk,kk,hk,hk,hk,hk,hk,hk,hk,hk,hk,hh,hk,kk,kk,kk,hk,hh	TGCAGGCAGGTAACACGAGGAGATGTATACGAGGGATATGAAACTGCTCCATATTTGATTGATTCTGAAGCTCTCAGATTTGGTGCTATATTTTC	scaffold_91	100	95	0	0	1	95		249158	249064	1e-46	188
scf91.1	I	109.005	<hkxhk>,(hh,hk,kk),kk,HK,kk,kk,hh,hk,hk,hk,hk,hk,hk,hk,hk,kk,hk,hk,hk,hk,hk,hk,hk,hk,hk,hh,hk,kk,kk,kk,hk,hh	TGCAGGGGGCGCCACATGGTTGCTGTTGACTTGCTGATATAAGTTTCCCCGCAAATAAATTCTGGCATAGAGAGCCGTGGTTTTTAGAGGCAGTA	scaffold_91	98.95	95	1	0	1	95		44846	44752	2e-44	180
scf8734.1	I	113.752	<efxeg>,(ee,ef,eg,fg),fg,ee,--,fg,ee,ef,eg,eg,eg,eg,eg,ee,eg,--,ef,eg,eg,ef,ef,eg,ef,eg,eg,ee,ef,fg,fg,fg,eg,ee	TGCAGGGCCTGCACCTGGTGCTGCAGCTCCTGCACTGCACCACTCGCCTTGCTGCCCAGCTCATCCTGACAGTCACCCGGACACGAAGCAGCAGT	scaffold_8734	98.95	95	1	0	1	95		40482	40576	2e-44	180
scf1086.1	I	117.704	<lmxll>,(ll,lm),lm,lm,lm,lm,ll,lm,ll,ll,ll,ll,ll,lm,ll,lm,lm,ll,ll,lm,lm,ll,LM,ll,ll,ll,lm,lm,lm,lm,ll,ll	TGCAGGGCCTCCAGTTTTGCCTTCTACATTTAAAAACATGCGTTTACATAATTGGTTACAATAACTTCCCATATATTATAAAAGCCACTTCGATG	scaffold_1086	98.95	95	1	0	1	95		196528	196622	2e-44	180
scf1086.2	I	119.603	<nnxnp>,(nn,np),nn,np,nn,nn,np,np,nn,nn,nn,nn,nn,np,nn,np,NP,nn,nn,np,np,nn,np,nn,nn,np,np,nn,nn,nn,nn,np	TGCAGGAACCACATCGGAGGAAGAACCAATGGGGAGACCCGGCATTCCACTTCCACGTATCTTATGTATTTTGAACTTCTTTCGTACTGTACATG	scaffold_1086	100	95	0	0	1	95		92511	92605	1e-46	188
scf1086.3	I	119.603	<nnxnp>,(nn,np),nn,np,nn,nn,np,np,nn,nn,nn,nn,nn,np,nn,np,np,nn,nn,np,np,nn,np,nn,nn,NP,np,nn,nn,nn,nn,np	TGCAGGAGGTGCTCGGAGCGCAATTCCACAAGGATTGACCGCAGTGGAGCCCCAGGTAGTGGACCCTGGTACACAACCCTGAATTACGACCTCAC	scaffold_1086	100	95	0	0	1	95		92514	92420	1e-46	188
scf1086.4	I	119.603	<nnxnp>,(nn,np),nn,np,nn,nn,NP,np,nn,nn,nn,nn,nn,np,nn,np,np,nn,nn,np,np,nn,np,nn,nn,np,np,nn,nn,nn,nn,np	TGCAGGAGATATTCCAAACAATGGGTTCACATTCAAATATTTGCAAAGACAAATTGAAAAAATCCATTTCTATAATGCTATCTCCTGGCCATTTC	scaffold_1086	100	95	0	0	1	95		74777	74871	1e-46	188
scf1086.8	I	119.603	<nnxnp>,(nn,np),nn,np,nn,nn,np,np,nn,nn,nn,nn,nn,--,nn,np,np,nn,nn,np,np,nn,np,nn,nn,np,np,nn,nn,nn,nn,np	TGCAGGAAATTATTGTGCCCACCCATACCCACTCATAAAGAGAACTGGCCAAACCTCTTAAAAACAAGTGTTGAATCTTAGAGTTGGTTACCTGG	scaffold_1086	100	95	0	0	1	95		74780	74686	1e-46	188
scf1957	I	119.603	<hkxhk>,(hh,hk,kk),hk,kk,hk,hk,hk,kk,hh,hh,hh,hh,hh,kk,hh,kk,hk,hh,hh,kk,kk,hh,kk,hh,hh,hk,kk,hk,hk,hk,hh,hk	TGCAGGCAAAAGAGCAATCATGTCATCTTACCAAGGAACAACCCCAAAAGTCAATAACACAATTCCTCAATGTGTCCCTTCCAATAGATTTTCTT	scaffold_1957	97.89	95	2	0	1	95		27218	27124	6e-42	172
scf1086	I	123.053	<hkxhk>,(hh,hk,kk),hk,hh,hk,hk,hk,hh,kk,kk,kk,kk,kk,hh,kk,hh,hk,kk,kk,hh,hh,kk,hh,kk,kk,hk,hh,hk,hk,hk,kk,hk	TGCAGGCCAACGCCTTCGTGCAGGTAAGGTGCCTCTTCTTCTTATTCTTCTTCCCCAAGGCAGCCCAGCGGTCCTGAGCAGTCACCAATAGTTCA	scaffold_1086	100	95	0	0	1	95		241976	242070	1e-46	188
scf1086.6	I	123.053	<nnxnp>,(nn,np),nn,np,nn,nn,np,np,nn,nn,nn,nn,nn,np,nn,np,nn,nn,nn,np,np,nn,np,nn,nn,np,np,nn,nn,nn,nn,np	TGCAGGGGTGGGGGACGGTGCATGCACGACCATGTGTCGTCGAAGGCGAAGTCACCATCAACGCATTCACGCGTTTGTGTTTGTGCATGGCTTTA	scaffold_1086	100	95	0	0	1	95		293677	293771	1e-46	188
scf1086.7	I	123.053	<nnxnp>,(nn,np),nn,np,nn,nn,np,np,nn,nn,--,--,nn,np,nn,np,nn,nn,nn,np,np,nn,np,nn,nn,np,np,nn,nn,nn,nn,np	TGCAGGTCATCAACCTCATCGTGTTTTTCTTCCTCGTCTTCTTCACGGTGCTGCCCACGTTTTGGCTGGCACTACCCATTATCCTGTGGGAGGGG	scaffold_1086	100	95	0	0	1	95		293680	293586	1e-46	188
scf1285	I	123.053	<lmxll>,(ll,lm),lm,lm,lm,lm,ll,lm,ll,ll,ll,ll,ll,lm,ll,lm,lm,ll,ll,lm,lm,ll,lm,ll,ll,ll,lm,lm,lm,lm,ll,ll	TGCAGGAGTGGAGAGGGAGGGCCAGGCGCCGACGCGGTTTGCGTGCGGGGTGCTGGCTGGAGTGGTAGCATCTCTCGTCACGCAACCAGCCGATA	scaffold_1285	98.95	95	1	0	1	95		3476	3570	2e-44	180
scf13900	I	123.053	<lmxll>,(ll,lm),ll,ll,ll,--,lm,ll,lm,lm,lm,lm,lm,ll,lm,ll,--,lm,lm,ll,ll,lm,ll,lm,lm,lm,--,ll,ll,ll,lm,lm	TGCAGGTGGAAACGAACACAGCCCTGTGTGTGATCTCGTTGGGCTCACACACAGGGCCACTTGGCTTGTTCCTGTCGACCACTTACCTGTGTTTT	scaffold_13900	98.95	95	1	0	1	95		3461	3367	2e-44	180
scf1829	I	123.053	<lmxll>,(ll,lm),lm,lm,lm,lm,ll,lm,ll,ll,ll,ll,ll,lm,ll,lm,lm,ll,ll,lm,lm,ll,lm,ll,ll,ll,lm,lm,lm,lm,ll,ll	TGCAGGCACACACAGGTTGCACTCGTGGGTCACACAACACAAAGAAAAAAGATCCCGTCGTATAGTCTTTAACAGACTCTGGGGCAAGGGACGTT	scaffold_1829	98.95	95	1	0	1	95		86488	86394	2e-44	180
scf1957.1	I	123.053	<lmxll>,(ll,lm),lm,lm,lm,lm,ll,lm,ll,ll,ll,ll,ll,lm,ll,lm,lm,ll,ll,lm,lm,ll,lm,ll,ll,ll,LM,lm,lm,lm,ll,ll	TGCAGGCTGCCACCTCGTGCTGCTGCCCTGCAGTCTGCTTGAGCGGCAGCCTTTAGAACTTATCGAAATTATTAGCCACATCAGCGGCTCCGACC	scaffold_1957	98.95	95	1	0	1	95		42841	42935	2e-44	180
scf233.3	I	123.053	<lmxll>,(ll,lm),lm,lm,lm,lm,ll,lm,ll,ll,ll,ll,ll,lm,ll,lm,lm,ll,ll,lm,lm,ll,lm,ll,ll,ll,lm,lm,lm,lm,ll,ll	TGCAGGAATTTGCTGAAGAGTCTTGAAACCTCTATGAGGTATCTGAGTTTAACATGAATAAAAACAGTGACATAACACGGTTGGCATTGGCCCTG	scaffold_233	100	95	0	0	1	95		372315	372221	1e-46	188
scf393.2	I	123.053	<lmxll>,(ll,lm),lm,lm,lm,lm,--,lm,ll,ll,ll,ll,ll,lm,ll,lm,lm,ll,ll,lm,lm,ll,lm,ll,ll,ll,lm,lm,lm,lm,ll,ll	TGCAGGATCAGTGATGCATAGCAGCACTAACCAGGCTTATGCCTGCTTCGCTTCTGAGATTTCATAAGATTGGGTGCATTCCAAGTGAATTGGTT	scaffold_393	97.89	95	2	0	1	95		73590	73496	6e-42	172
scf700	I	123.053	<nnxnp>,(nn,np),nn,np,nn,nn,np,np,nn,nn,nn,nn,nn,np,nn,np,nn,nn,nn,np,np,nn,np,nn,nn,np,NP,nn,nn,nn,nn,np	TGCAGGTAACAGAAAGAGCACACGACTACACACACTTTAATGGTGCCGCCGAGTTGGCAGTGGTGCACAAGCACAAACAATACGCAAGAAATTCG	scaffold_700	98.95	95	1	0	1	95		27053	27147	2e-44	180
26504	I	128.355	<abxcd>,(ac,ad,bc,bd),--,bc,bd,bd,bc,bc,ad,bd,ad,ad,ad,bc,ad,bc,bd,ad,ad,bc,--,--,bc,ac,--,ac,bc,bd,bd,bd,ad,ac	TGCAGGAGCAGAAGCATCTTCATCGGTAGTATTATCAACATGAGAAACAACAGCATAACATCATCAGAAATAGCAGTATGAACAATATCATTCTA
scf2221	I	128.355	<lmxll>,(ll,lm),ll,ll,ll,ll,ll,ll,lm,ll,lm,lm,lm,ll,lm,ll,ll,lm,lm,ll,ll,lm,ll,lm,lm,lm,ll,ll,ll,ll,lm,lm	TGCAGGGGACGCGAACTCGGCGGCCGCGTTCCCAACTCCTGGGGGAGGCTAAAGGCCACCTCTAAAAGTATCCCTGGACCGCGTTTCTAACACGA	scaffold_2221	97.89	95	2	0	1	95		137611	137705	6e-42	172
scf229	I	128.355	<nnxnp>,(nn,np),nn,np,nn,nn,np,np,nn,nn,nn,nn,nn,np,nn,np,nn,nn,nn,np,np,nn,np,np,nn,np,np,nn,nn,nn,nn,np	TGCAGGCGGGCCCACACCAGCATGGCGAACCACCACAGCGCCACGTGCACGGCCGCCATGGGGCCCACGGCCGCCACGTAGAAACCCAGCGTGAC	scaffold_229	98.95	95	1	0	1	95		337223	337317	2e-44	180
scf229.1	I	128.355	<nnxnp>,(nn,np),nn,np,nn,nn,NP,np,nn,nn,nn,nn,nn,np,nn,np,nn,nn,nn,np,np,nn,NP,np,nn,np,np,nn,nn,nn,nn,np	TGCAGGACACTGATTTCACCACTTCGAAGAAGAAGGAGTTCGTCTACAACAGCGTCGTGGCTGTCATATGGGTTCGTGATATTTATGAGGTCGCA	scaffold_229	98.95	95	1	0	1	95		337226	337132	2e-44	180
scf229.2	I	128.355	<nnxnp>,(nn,np),nn,np,nn,nn,np,np,nn,nn,nn,nn,nn,np,nn,np,nn,nn,--,np,np,nn,np,np,nn,np,np,--,--,--,nn,np	TGCAGGCTGACGGCCGACATCGTGGTGCAGTTCTTCAGCCTGGCGTGGCTTTACGATGACTGGAAAGAGCGACGCGTGAATCAAAACTTGGAATT	scaffold_229	100	95	0	0	1	95		338890	338796	1e-46	188
scf24853	I	128.355	<lmxll>,(ll,lm),ll,ll,ll,ll,ll,ll,lm,ll,lm,lm,lm,ll,lm,ll,--,lm,lm,ll,ll,lm,ll,lm,lm,lm,ll,ll,ll,ll,lm,lm	TGCAGGGCTGAGGTTATCTCTGCGATGGCCGGCATTGTTGTGAACATGCAGAGGTGAACGATGCGGGTTTGTGTTTAAGACAAAATAACGCCGGC	scaffold_24853	98.95	95	1	0	1	95		56784	56878	2e-44	180
scf24853.1	I	128.355	<lmxll>,(ll,lm),ll,ll,ll,ll,ll,ll,lm,ll,lm,lm,lm,ll,lm,ll,ll,lm,lm,ll,ll,lm,ll,lm,lm,lm,ll,ll,ll,ll,lm,lm	TGCAGGCAGTCGCTCCGGTTAACACAAATGCTGCTTTGACATTCATTTAGTGACAATGGCGTGGACATCGCCAGTAAACCTATTTAAACATGTTC	scaffold_24853	100	95	0	0	1	95		34269	34363	1e-46	188
scf24853.2	I	128.355	<lmxll>,(ll,lm),ll,ll,ll,--,ll,ll,lm,ll,lm,lm,lm,ll,lm,ll,ll,lm,lm,ll,ll,lm,ll,lm,lm,lm,ll,ll,ll,ll,lm,lm	TGCAGGCAAGGGCGTCCAATGATCCTTAACATCCACGGTTAACAAAAATCCCCGAAGCGTGCCGTCTCATTTCCAATTGACTTCCAATTGAACGC	scaffold_24853	100	95	0	0	1	95		56042	55948	1e-46	188
scf3474	I	128.355	<lmxll>,(ll,lm),ll,ll,ll,ll,ll,ll,lm,ll,lm,lm,lm,ll,lm,ll,ll,lm,lm,ll,ll,lm,ll,lm,lm,lm,ll,ll,ll,ll,lm,lm	TGCAGGATGCCAGGTACCCCAATCATGTTCAAGGCAGACCAGAAATAGAATCGATTCACAGAGTCATAATCCACATTAAAATCAATGTAAGCGAC	scaffold_3474	100	95	0	0	1	95		20441	20535	1e-46	188
scf9900	I	128.355	<lmxll>,(ll,lm),ll,ll,ll,ll,ll,ll,lm,ll,lm,lm,lm,ll,lm,ll,ll,lm,lm,ll,ll,lm,ll,lm,lm,lm,ll,ll,ll,ll,lm,lm	TGCAGGTCAATATCTTCCAAGAAATAACATTTCCCATTATGTACCGTTGCACAATTTACGATTGAAAAATGCTGCCTTTCAAGGTATGTTGGCGT	scaffold_9900	100	95	0	0	1	95		1509	1415	1e-46	188
scf5192	I	135.68	<hkxhk>,(hh,hk,kk),hk,hh,hk,hk,hh,hh,kk,hh,kk,hk,kk,hh,kk,hh,hk,kk,kk,hh,hh,kk,hh,hk,kk,kk,hh,hk,hk,hk,hk,--	TGCAGGCCGCCATGTTTGTGGACTACACCTGGAGGAGCATGCGGCTCTTGTCCGACTTCAAGTGAGCGCCCCTCCCCCACTCGCCGCACAAAACA	scaffold_5192	98.95	95	1	0	1	95		10466	10560	2e-44	180
scf6698	I	135.68	<lmxll>,(ll,lm),ll,ll,ll,ll,--,ll,lm,--,lm,ll,lm,ll,lm,ll,ll,lm,lm,ll,ll,lm,ll,lm,lm,lm,ll,ll,ll,ll,lm,lm	TGCAGGCCGTATCCACCCCATAGGGCGTGTCCACCCCAGCGGCCGTAGGTTCCCCTCGCCTGCTCTAGGGCGATGGTTGCCGAGTCCCTGCGACC	scaffold_6698	100	95	0	0	1	95		12104	12198	1e-46	188
scf1495	I	142.854	<hkxhk>,(hh,hk,kk),hk,hh,hk,hk,hk,hh,kk,hh,kk,hk,kk,hh,kk,hh,kk,kk,kk,hh,hh,kk,hh,hk,kk,hk,hh,hk,kk,hk,HK,hk	TGCAGGGCAAAGGCCGGGCAGGTGGTGAGGGGACAGGAGGTGGGGGGGAACAAGGGTGACTCACACATTATTGTCTAAGTCAGAATCTTAGTCAG	scaffold_1495	100	95	0	0	1	95		195160	195254	3e-34	147
scf1026.1	I	146.304	<hkxhk>,(hh,hk,kk),hk,kk,hk,hk,hk,kk,hk,kk,hh,hk,hh,kk,hh,kk,hh,hh,hh,kk,kk,hh,kk,hk,hh,hk,kk,hk,hk,hk,hk,hk	TGCAGGAGCAGCTCCGGGCTCATGTGGCCCGGCCTGCTTCAGCACGTCTGTGGCCCACAAAAAGCATGGTAGCCGTGAGAGGCCCATGGCTGGAA	scaffold_1026	100	95	0	0	1	95		47431	47525	1e-46	188
scf12410	I	146.304	<hkxhk>,(hh,hk,kk),HK,hh,hk,hk,hk,hh,hk,hh,kk,hk,kk,hh,kk,hh,kk,kk,kk,hh,hh,kk,hh,hk,kk,hk,hh,hk,hk,hk,hk,hk	TGCAGGAAAAATAAGGCACCACAACTGCTACTACTGCGTAGGTTCTCGTGGTAGTGCTGGATGTAGAACTTCTTTCGTACCATACATAGTGAACC	scaffold_12410	100	95	0	0	1	95		3850	3944	1e-46	188
scf12410.1	I	146.304	<hkxhk>,(hh,hk,kk),hk,kk,hk,hk,hk,kk,hk,kk,hh,hk,hh,kk,hh,kk,hh,hh,hh,kk,kk,hh,kk,hk,hh,hk,kk,hk,hk,hk,hk,hk	TGCAGGGCATGTACGGGATGTACCCCCAGTCACCTGGGCAGTATATGATGCAACCAGGCTACCATCAGCAGCCTCTACAGACGGAGGATCAGACT	scaffold_12410	98.95	95	1	0	1	95		3853	3759	2e-44	180
scf1026	I	148.028	<hkxhk>,(hh,hk,kk),hk,kk,hk,hk,hk,kk,hk,kk,hh,hk,hh,kk,hh,kk,hh,hh,hh,kk,kk,hh,kk,hk,hh,hk,kk,hk,hh,hk,hk,hk	TGCAGGTCCCGAGTGGGCATCGTACACCCTGGGCGTCTTTCTGTGCCTGGAATGCTCGAGCATCCACGCGAACCTGCGGGACACCAGCAAGGTCA	scaffold_1026	97.89	95	2	0	1	95		7935	8029	6e-42	172
scf2826.1	I	148.028	<hkxhk>,(hh,hk,kk),hk,hh,hk,hk,HK,--,hk,hh,kk,hk,kk,hh,kk,hh,kk,kk,kk,hh,hh,kk,hh,HK,kk,hk,hh,hk,kk,hk,hk,hk	TGCAGGTCGGTAAGTTGTTAACTACTCCGCTTGGTATACAGGGCAATGGGTTCAATCCCGACCCTAACGCCTAGATCTATTTGGAGTTTTCATGT	scaffold_2826	97.83	92	2	0	1	92		959569	959660	4e-40	167
scf2826.2	I	151.606	<hkxhk>,(hh,hk,kk),hk,kk,hk,hk,hk,kk,hk,kk,hh,hk,hh,kk,hh,kk,hh,hh,hh,kk,kk,hh,kk,hk,hh,hk,HK,hk,hh,hk,hk,kk	TGCAGGCACACGGGAACAGTGCACGTTCAAAGCTTGTGTGCAGGATGAGCAATGCACATTTTCATAATAAATTACTTTTGCACATTGCATCATGT	scaffold_2826	100	95	0	0	1	95		542294	542200	1e-46	188
scf24812	I	153.331	<hkxhk>,(hh,hk,kk),hh,hk,hh,hh,hh,hk,kk,hk,hk,hh,hk,hk,hk,hk,hk,hk,hk,hk,hk,hk,hk,kk,hk,kk,hk,hh,hk,hh,kk,hk	TGCAGGAACTTGGCTATTCCGATTCAACGTCACCGCTCCGAATTAATGACTCCTTGACGGAAGGTGGACTCTCCAAAGAGCCCGCGTTCACTCAA	scaffold_24812	98.95	95	1	0	1	95		9967	10061	2e-44	180
scf2826	I	153.331	<hkxhk>,(hh,hk,kk),hk,kk,hk,hk,hk,kk,hk,kk,hh,hk,hh,kk,hh,kk,hh,hh,hh,kk,kk,hh,kk,hk,hh,HK,kk,hk,hh,hk,hk,kk	TGCAGGATCATATTTGTCACATCTCCAGTTGACCCATCTTAAAATATGCTCCCCACATGCCACCTTTCCTCTCATCAGATTACTCAGTAATTCCT	scaffold_2826	98.95	95	1	0	1	95		679934	679840	2e-44	180
scf8885	I	153.331	<hkxhk>,(hh,hk,kk),kk,hk,kk,kk,kk,hk,hh,hk,hk,kk,hk,hk,hk,hk,hk,hk,hk,hk,hk,hk,hk,hh,hk,hh,hk,kk,hk,kk,hh,hk	TGCAGGGAACTGATGTTGGCTACTGCAACGATGCATTGGAGGATTGTTGCTAAAAGGTTTTGTAAATTTATCCCGTGAGTTAGATTCAAAATGTC	scaffold_8885	98.95	95	1	0	1	95		11024	10930	2e-44	180
21607	I	160.634	<efxeg>,(ee,ef,eg,fg),fg,fg,fg,fg,fg,fg,ee,ef,ef,fg,eg,ef,eg,ef,eg,eg,eg,ef,ef,eg,ef,ee,eg,ee,ef,fg,eg,fg,ee,ef	TGCAGGAAGACAACAGAGAGATCCGTTACTAACGCGTGGCCAATAGTTGTGTGACTAGATTACCTGGATCGTGCCGAACAGAGTTGAGTTTGGAT
scf1516.1	I	160.634	<lmxll>,(ll,lm),ll,ll,ll,ll,ll,ll,LM,ll,ll,ll,lm,ll,lm,ll,--,lm,lm,ll,ll,--,ll,lm,lm,LM,ll,ll,LM,ll,lm,ll	TGCAGGGTCACGGCAAAGGCCACAAGCATGGACAGGGCGCTTGTGGAGAGCACAAGAAGCACAAGGAGCACAAGGAGCACAAGGAGCACAAGGAA	scaffold_1516	98.94	94	1	0	1	94		44043	43950	1e-43	178
scf167	I	160.634	<lmxll>,(ll,lm),lm,lm,lm,lm,lm,lm,ll,lm,lm,lm,ll,lm,ll,lm,ll,ll,ll,lm,lm,ll,lm,ll,ll,ll,lm,lm,ll,lm,ll,lm	TGCAGGGGGTGCTTGCACCCCAGGTTAAGAACCACTGCCCTGTAGCCTTAACAGACTGTTGGGGCAAGTGCTGAGAGCAACCTGTAAAGGCCAAC	scaffold_167	100	95	0	0	1	95		294459	294365	1e-46	188
scf948.1	I	160.634	<hkxhk>,(hh,hk,kk),kk,kk,kk,kk,kk,kk,hh,hk,hk,kk,hk,hk,hk,hk,hk,hk,hk,hk,hk,hk,hk,hh,hk,hh,hk,kk,hk,kk,hh,hk	TGCAGGAGCGCGCATGTTTCGCGCCGCCGCTGTAGCGCTAGTCTTTGTGCGGACGCGGATTTGGGTATAACCGCCGGCATGCGCGCGTGTTCGCG	scaffold_948	100	95	0	0	1	95		8123	8217	1e-46	188
scf948	I	162.376	<efxeg>,(ee,ef,eg,fg),--,fg,fg,fg,--,fg,ee,ef,ef,fg,eg,ef,eg,ee,eg,eg,eg,ef,ef,eg,ef,ee,eg,ee,ef,--,eg,fg,ee,ef	TGCAGGAACCTGGGGGCCAGTAGCATAACACTCTTCGGTTACTTTCTTTGAGTTCACACGGACTTAACGTTCCAAACAACGGAAGAATATTTCCG	scaffold_948	98.95	95	1	0	1	95		22939	23033	2e-44	180
scf3139	I	166.476	<nnxnp>,(nn,np),nn,nn,nn,nn,nn,nn,np,np,np,nn,nn,np,np,np,nn,nn,nn,np,np,nn,np,np,nn,np,np,np,nn,nn,np,np	TGCAGGACATTTGTATCTTCGAGCGCGTCATCTCACTTGACAGGTGACGGCACGTTTCATATCCCTGGTACGTGCGAGTTCTGAAACTGGCCAGG	scaffold_3139	98.95	95	1	0	1	95		15173	15079	2e-44	180
scf1516	I	175.413	<efxeg>,(ee,ef,eg,fg),ee,ee,eg,eg,ee,ee,fg,eg,eg,ee,ef,eg,fg,eg,ef,ef,ef,eg,eg,ef,eg,fg,fg,fg,eg,eg,ef,eg,fg,eg	TGCAGGGTCAAGGCGCCAGACACGGGGAGAGACGGAGGCACCCGGGTCACCATTGGACATCGTCCCGCCCTTTAAAGATTTGGAAGGGTGAACCC	scaffold_1516	100	95	0	0	1	95		44040	44134	1e-46	188
scf517	I	180.707	<lmxll>,(ll,lm),ll,ll,ll,ll,ll,ll,lm,ll,ll,ll,lm,ll,lm,ll,lm,lm,lm,ll,ll,lm,ll,lm,lm,lm,ll,lm,lm,ll,lm,ll	TGCAGGTGTAATTGTTAACAATTTGTACATGAGGATTACTCTGAACGTGGGGCAATATATATTACAAAATTACATTTCGTGGTGTATTATCAAAA	scaffold_517	97.89	95	2	0	1	95		78486	78392	6e-42	172
scf1361	I	180.733	<hkxhk>,(hh,hk,kk),hk,hk,hh,hh,hk,hk,hk,hh,hh,hk,kk,hh,hk,hk,kk,kk,hk,hh,hh,kk,hh,hk,hk,hk,hh,hk,kk,hh,hk,hh	TGCAGGGATCATGGGCTGAGTCAGCCACCAACCAACGCTTGAGCTCGCAAGTTTACGATTGCGAGCCTCTCGCTCGACCGCTGAGCTCCGTGATT	scaffold_1361	100	95	0	0	1	95		268610	268704	1e-46	188
scf3808	I	184.272	<lmxll>,(ll,lm),LM,ll,ll,ll,ll,ll,lm,ll,ll,ll,lm,ll,lm,ll,lm,lm,lm,ll,ll,lm,ll,--,lm,lm,ll,lm,lm,ll,lm,ll	TGCAGGGGTTTCTCGTGATTTTTATAAAAGGCGTAACATTTTTAATTAGCAAAAAGTGTTCCAAGTATATGAGATTTTCTATTAAACCTTGCGGC	scaffold_3808	100	95	0	0	1	95		1484	1578	1e-46	188
scf34.4	I	206.246	<nnxnp>,(nn,np),np,np,np,np,np,np,np,np,np,np,nn,np,np,NP,nn,nn,np,np,np,nn,np,np,np,np,np,np,nn,np,np,np	TGCAGGGACCTGTTAATAAGAGCACTCTAGTGGTGAGGTCGTCTTATACAGCCCTTTTCATGCCACTGTTGTGCGATGGAATTTTCTGTATGATA	scaffold_34	100	95	0	0	1	95		648841	648747	1e-46	188
scf2090.1	II	0	<hkxhk>,(hh,hk,kk),kk,kk,hk,hk,hh,hh,hk,hh,hk,hh,hh,kk,hk,hk,kk,hk,hk,hk,hh,hk,hh,hk,hk,hh,hk,hk,kk,kk,kk,hh	TGCAGGCCACTGGCAGCCCCGGACGTGCGGCCCCCCCAACAACACACAAATGTGAAGACACCCCCTCTGCAGGCAGTGTGGCAGCCCTCGCACTG	scaffold_2090	100	95	0	0	1	95		54314	54220	3e-34	147
scf6132.3	II	1.725	<nnxnp>,(nn,np),nn,nn,nn,np,NP,np,np,np,np,np,np,nn,nn,nn,nn,np,np,np,np,nn,nn,np,nn,np,np,nn,nn,nn,nn,np	TGCAGGTTCGGCAAATGGCATGTTCACAAATATCACTTAATAACAATGTGGTGATGTATTATTATTATCAGACTGAAGACGGTCGCTCGTGTTGA	scaffold_6132	100	95	0	0	1	95		165978	166072	1e-46	188
scf2090	II	3.45	<hkxhk>,(hh,hk,kk),hh,hh,hk,hk,kk,kk,hk,kk,hk,kk,kk,hh,hk,hk,hh,hk,hk,hk,kk,hk,hk,hk,hk,kk,hk,hk,hk,hh,hh,kk	TGCAGGCACAGCACCGCCTCGTTCACAAAGCGGCTCACCAGCCGCAGCTGCACGTCCTGGTCCGTTGACCTGGAGGTCACAAAGACATACACATG	scaffold_2090	100	93	0	0	1	93		60585	60493	2e-45	184
scf8592	II	3.45	<hkxhk>,(hh,hk,kk),hh,hh,hk,hk,kk,kk,hk,kk,hk,kk,kk,hh,hk,hk,hh,hk,hk,hk,kk,hk,hk,hk,hk,kk,hk,hk,hk,hh,hh,--	TGCAGGAATTCATATTCTTAGGTGATTTATTTATTAGAAGAAAAAATAACAAATCTAGGCTGACAAAATTACGCGCAATGTGCCGGCATTGATTC	scaffold_8592	100	95	0	0	1	95		14028	14122	1e-46	188
scf1755	II	10.753	<hkxhk>,(hh,hk,kk),kk,kk,hk,hk,hh,hh,hh,hh,kk,hh,hh,kk,hk,hk,hk,hk,hk,hk,hk,hk,hk,hk,hk,hh,hk,hk,hk,kk,kk,hh	TGCAGGAAATGTGCCTTGACCTCGGAGCGCTTAGAAGAAGGCAATCCGAAGATCTCATGGACCGCTTTGGGTGGTCTAAAGATTGGATCATCTTC	scaffold_1755	100	95	0	0	1	95		15557	15651	1e-46	188
scf1755.1	II	10.753	<lmxll>,(ll,lm),lm,lm,--,lm,ll,ll,ll,ll,lm,ll,ll,lm,ll,ll,ll,lm,lm,lm,lm,ll,ll,lm,ll,ll,lm,ll,lm,lm,lm,ll	TGCAGGGTCATTAAAATGAGTACCACTTCACGGGGGAAGCCGGCAGTGGTTTTTCCCTGGACGGATTCAACAACAGCCATAGGAATGTGGAATTT	scaffold_1755	97.89	95	2	0	1	95		24490	24396	6e-42	172
scf2029	II	10.753	<hkxhk>,(hh,hk,kk),hh,hh,hk,hk,kk,kk,kk,kk,hh,kk,kk,hh,hk,hk,hk,hk,hk,hk,hk,hk,hk,hk,hk,kk,hk,hk,HK,hh,hh,kk	TGCAGGGGGACCCCGGGAAAAATGGAATCAAAGGAGAGGTAGGGACGATGATGACAGGTTGTGGTTGAGTCTGAGGACTGCTTGTATTGAACTAT	scaffold_2029	100	95	0	0	1	95		5920	6014	1e-46	188
scf3254	II	10.753	<nnxnp>,(nn,np),np,np,np,nn,nn,nn,nn,nn,np,nn,nn,np,np,np,np,nn,nn,nn,nn,np,np,nn,np,nn,nn,np,nn,np,np,nn	TGCAGGAATGGGCACGGACGTGCTGGGCGAGCTCTCACTCTTCCGGAAACAGCTGCAGAACGAACAGCGCCGTCTGGAGAGTCAGCTGCGGCAGC	scaffold_3254	98.95	95	1	0	1	95		8931	9025	2e-44	180
scf7202.1	II	10.753	<nnxnp>,(nn,np),np,np,np,nn,nn,nn,nn,nn,np,nn,nn,np,np,np,np,nn,nn,nn,nn,np,np,nn,np,nn,nn,np,nn,np,np,nn	TGCAGGGACGTCTTCTGAGCTGCTCGTGAGAATCGCACAAGATCACGTGTCCTCGATCCAACAAGTCCATGGGCACCGATGCTGAGATGCATTTT	scaffold_7202	98.95	95	1	0	1	95		6226	6320	2e-44	180
scf1447.1	II	12.478	<hkxhk>,(hh,hk,kk),--,hh,hk,hk,kk,kk,kk,kk,hh,kk,hk,hh,hk,hk,hk,hk,hk,hk,hk,hk,hk,hk,hk,kk,hk,hk,hk,hh,hh,kk	TGCAGGTTAACGATAACAGACCTAGTACTTGATAACAAAACAACGCCTATCGTACGGCAATTGTGATCTTGAGATAATATTGGTTATTGACACCA	scaffold_1447	98.95	95	1	0	1	95		61464	61558	2e-44	180
scf1447.4	II	12.478	<lmxll>,(ll,lm),lm,lm,ll,lm,ll,ll,ll,ll,lm,ll,lm,lm,ll,ll,ll,lm,LM,lm,LM,ll,ll,lm,ll,ll,lm,ll,lm,lm,lm,ll	TGCAGGCCAAGCCGATGGCGGAGGAGGCCTCGCTGGGCCAGGCGGTCATCAGCGTCATCCTGCCTCTGGCCGCGGGCGACACGCTCTGCATGGAG	scaffold_1447	98.95	95	1	0	1	95		12565	12659	2e-44	180
scf1447.5	II	12.478	<lmxll>,(ll,lm),lm,lm,ll,lm,ll,ll,ll,ll,lm,ll,lm,lm,ll,ll,ll,lm,lm,lm,lm,--,ll,lm,ll,ll,LM,ll,lm,lm,lm,ll	TGCAGGTCGTGTGTGACGAGAACGGTTCCCGGGGCTACGGCTTCGTTCACTTTGAGACACAGGAGGCGGCCGACCGTGCCATCGAGAAGATGAAC	scaffold_1447	100	95	0	0	1	95		30894	30800	1e-46	188
scf7747	II	14.212	<hkxhk>,(hh,hk,kk),kk,kk,HK,hk,--,hh,hh,hh,kk,hh,hk,kk,hk,hk,hk,hk,hk,hk,hk,hk,hk,hk,hk,hh,hk,kk,hk,kk,kk,hh	TGCAGGTACTTGGCAGCGACCCCCTGCACCGTGGCCCAGTACTGCCAGCCCAACGCGGCCAGAACCATTCCCATGGTGAGGCTCAGCGGGGACAT	scaffold_7747	100	95	0	0	1	95		29728	29822	1e-46	188
scf1447	II	15.945	<hkxhk>,(hh,hk,kk),kk,kk,hk,hk,hh,hh,hh,hh,kk,hh,hk,kk,HK,hk,hk,hk,hk,hk,hk,hk,hk,hk,hk,hh,hk,hk,hk,kk,kk,hh	TGCAGGTCACAACACTTATTTGGAGCTGATGTTTGTGTTGAGTTTGTTCATATTAGCGCCGTTGGCTACGTACGGTGCGAAGGAAGTTCAACATG	scaffold_1447	100	95	0	0	1	95		48468	48562	1e-46	188
scf1447.2	II	15.945	<hkxhk>,(hh,hk,kk),hh,hh,hk,hk,kk,kk,kk,kk,hh,kk,hk,hh,hk,hk,hk,hk,hk,hk,hk,hk,hk,hk,hk,kk,HK,hk,hk,hh,hh,kk	TGCAGGGTCTTCTCGATCTCCTCGGGCCGGGGGCCGGAGGAGTCGACGTAGAGCAGCGAGTTGTTGGAGCGGCTCAGGATGGCGAACACGTGGTT	scaffold_1447	100	95	0	0	1	95		12568	12474	1e-46	188
scf1447.3	II	15.945	<lmxll>,(ll,lm),lm,lm,ll,lm,ll,ll,ll,ll,lm,ll,lm,lm,ll,ll,ll,lm,lm,lm,lm,ll,ll,lm,ll,ll,lm,ll,lm,lm,lm,ll	TGCAGGATGCGTGCGGTAACACCCGCACCGACATTGAGGATCGCCTGAGGTCCCTCAACGACACCATCTTCCAGATCCTGCACGACCCTCAGGAT	scaffold_1447	98.95	95	1	0	1	95		9025	9119	2e-44	180
scf265	II	16.808	<nnxnp>,(nn,np),np,np,np,nn,nn,nn,nn,nn,np,nn,nn,np,np,np,np,nn,nn,nn,nn,np,NP,nn,np,nn,nn,np,nn,np,np,nn	TGCAGGGGGTGATCGAGATTTTGCCACTTTGCCTGCTCCCAAGCTTCGGAATGCTTTGCCTTTGCTAAGAAGACAATGAGAGTCGTTAGCGATAT	scaffold_265	98.95	95	1	0	1	95		20562	20468	2e-44	180
scf7202	II	17.67	<efxeg>,(ee,ef,eg,fg),fg,fg,eg,ef,ee,ef,ee,ee,fg,ee,ef,fg,eg,eg,eg,ef,ef,ef,ef,eg,eg,ef,eg,ee,ef,eg,ef,fg,fg,ee	TGCAGGACACTCTGGGTTCACGCGGAACGTTGCGCCAACGTTCCCTTTTACTGGCCCAAACACATGCCAACGTTGGCGCAACGTAACACGTTTCA	scaffold_7202	98.95	95	1	0	1	95		6229	6135	2e-44	180
scf2997	II	19.395	<lmxll>,(ll,lm),lm,lm,ll,lm,ll,lm,ll,ll,lm,ll,lm,lm,ll,ll,ll,lm,LM,lm,lm,ll,ll,lm,ll,ll,ll,ll,lm,lm,lm,ll	TGCAGGGATCTCAGAAATAGTTTATTTTTATGAAATCACCAGTTGTTAAACACGGCGTGGTGCACTCCCCACTGCAAGAGTTCACAATGGACATT	scaffold_2997	98.95	95	1	0	1	95		14750	14844	2e-44	180
scf3365	II	19.395	<lmxll>,(ll,lm),lm,lm,ll,lm,ll,lm,ll,ll,lm,ll,lm,lm,ll,ll,ll,lm,lm,lm,lm,ll,ll,lm,ll,ll,ll,ll,lm,lm,lm,ll	TGCAGGGACACAGGGCAGCCCGGCGCACAGCAGGCCAGAACGGTCTTCCCATGAATCGGCCGTTCTCGAACTTCAGCGCCGTCGATTGGTACCAA	scaffold_3365	100	95	0	0	1	95		2437	2531	1e-46	188
scf6944.1	II	21.12	<hkxhk>,(hh,hk,kk),hh,hh,hk,hk,kk,hk,kk,kk,hh,kk,hk,hh,hk,hk,hk,hk,hk,kk,hk,hk,hk,hk,hk,kk,kk,hk,hk,hh,hh,kk	TGCAGGTGGTAAAATTGTGAGATAAAATTAATCAGCGCCTTAAATGCGCTGGAGCTCATTGAATCTCGATAGATAACTGGGGTTGAGCCCGATTC	scaffold_6944	98.94	94	1	0	2	95		3357	3264	1e-43	178
scf1447.6	II	22.845	<nnxnp>,(nn,np),np,NP,np,nn,nn,nn,--,nn,np,nn,nn,np,np,np,np,nn,nn,NP,nn,np,np,nn,np,nn,nn,np,nn,np,np,nn	TGCAGGTATCGTACCTTTGTACGGCCACAGTACAAGATTGCCTACAAGACGGTGAATGAGATGGAGTGGCGCTGCTGCCCGGGATACAGCGGGAA	scaffold_1447	98.95	95	1	0	1	95		2680	2774	2e-44	180
scf2010	II	24.569	<nnxnp>,(nn,np),--,--,np,nn,nn,nn,nn,nn,--,nn,nn,--,np,np,np,nn,nn,nn,nn,np,np,nn,np,nn,nn,NP,nn,--,--,nn	TGCAGGCAGATACATTTATCAAATTATTTAAACGATCCAAAAACTAAAAACACGTAATATATCCAAAAGCTTTCTTACATATCCAGATATACGTA	scaffold_2010	100	95	0	0	1	95		4174	4080	1e-46	188
scf6944	II	24.569	<hkxhk>,(hh,hk,kk),hh,hh,hk,hk,kk,hk,kk,kk,hh,kk,hk,hh,hk,hk,hk,hk,hk,kk,hk,hk,hk,hk,hk,kk,kk,hk,hk,hh,hh,kk	TGCAGGATTCACCACTCTGATGCAGATTGCCATTTTAAAATTTCTATTCCCTCAAATAAGTTTCCAACTGGGTTCGCGTGACATTTTAGCAATGC	scaffold_6944	98.9	91	1	0	5	95		3359	3449	6e-42	172
scf4036	II	28.019	<hkxhk>,(hh,hk,kk),--,hh,hk,hk,kk,hk,kk,hk,hh,kk,hk,hh,hk,hk,hk,hk,hk,kk,hk,hk,hk,hk,hk,kk,kk,hk,hk,hh,hk,--	TGCAGGGACAGCGCCGCGGCTCATGAGGTTTGTGCCGACGGGACCGTTTCGTCAAGAGGCCTGGTCAGCCACCTACCAGCGCCGCCGCCGTCGTC	scaffold_4036	98.95	95	1	0	1	95		18639	18733	2e-44	180
scf5011	II	28.019	<hkxhk>,(hh,hk,kk),hk,hk,kk,hh,hk,hh,hk,hh,hk,hk,hh,hk,kk,kk,kk,hh,hh,hk,hh,kk,kk,hh,kk,hk,HK,kk,hh,hk,hh,hk	TGCAGGCCAAGTTTATTGGGGGCGAGTCTAAGATTAATATTGGGTCTTTTTTGTATGGCATTTGAAGCGTTCATTTGTTACGATAGCGGTCAACC	scaffold_5011	100	95	0	0	1	95		14502	14596	1e-46	188
scf5011.1	II	28.019	<hkxhk>,(hh,hk,kk),hk,hk,kk,hh,hk,--,hk,hh,hk,hk,hh,hk,kk,kk,kk,hh,hh,hk,hh,kk,kk,hh,kk,hk,hk,kk,hh,hk,hh,hk	TGCAGGCAATCTGCCCTGTGGATAAGCAGGGCTACACCCTGCCTGCTTGTGGTGATGTGTACGTATAAAATGTATTTATTGTATCTATTTATACT	scaffold_5011	100	95	0	0	1	95		14505	14411	1e-46	188
scf3142	II	29.744	<hkxhk>,(hh,hk,kk),hk,hk,hh,kk,hk,kk,hk,kk,hk,hk,kk,hk,hh,hh,hh,kk,kk,hk,kk,hh,hh,kk,hh,hk,hh,hh,kk,hk,kk,hk	TGCAGGGGCAGCACCCCGCCCAGCGCCTCGATGGTGCCATACTTCGAGGCGTAGTGGAGCGGTGTGCAGCCCTCCGTGTCCTTGTCCTCCAGCAG	scaffold_3142	100	95	0	0	1	95		5674	5768	1e-46	188
scf24897	II	33.74	<lmxll>,(ll,lm),lm,lm,lm,ll,lm,ll,lm,ll,ll,LM,ll,ll,lm,lm,lm,ll,ll,lm,ll,lm,lm,ll,lm,lm,lm,lm,ll,ll,ll,lm	TGCAGGAGGAACTCATCGATGGGACTTTGTCCAGATCTTTCAAGGATTCGTGAGCTCCTTACACAATCCAACCTGTTTAAACCCAAGAGGGATCG	scaffold_24897	100	95	0	0	1	95		20850	20944	1e-46	188
scf3274	II	37.757	<efxeg>,(ee,ef,eg,fg),ef,ef,ef,eg,fg,eg,fg,eg,ee,fg,--,ee,ee,ef,ef,eg,eg,fg,--,ef,ef,eg,ef,fg,ef,ee,eg,ee,eg,fg	TGCAGGGATAGGTGAGCTCGTACGGTTTTCCACGACCGTGGAGGCCGCATCAACCGAGCGTCCCTCGACCGCAGACACGAGAAGAAAACTGAAAA	scaffold_3274	98.95	95	1	0	1	95		1530	1436	2e-44	180
scf3454.1	II	39.126	<nnxnp>,(nn,np),nn,nn,nn,np,--,np,--,np,nn,np,np,nn,nn,nn,nn,--,np,np,nn,nn,nn,np,nn,NP,nn,nn,--,nn,np,np	TGCAGGGTAAACGGACAGAACTCGGAAGCAAAGGCCAGTTTTAAGAGGTGCGTTTTCAAGACAAACTGAAATATCTCAAACGACTCTGCTTGTCT	scaffold_3454	97.89	95	2	0	1	95		25953	25859	6e-42	172
scf5169.1	II	39.126	<nnxnp>,(nn,np),np,np,np,nn,nn,nn,nn,nn,np,nn,nn,np,np,np,np,nn,nn,nn,np,np,np,nn,np,nn,np,np,nn,np,nn,nn	TGCAGGTGTTGTGTTTGTACAATCCGCATGTAAATTCCTTGCTAATTTTTAGTATATATACGAGTCCCAAAAAGTTATTGTTGCGGAAGCTTTGA	scaffold_5169	100	95	0	0	1	95		15972	16066	1e-46	188
scf6442	II	39.126	<nnxnp>,(nn,np),np,np,np,nn,nn,nn,nn,nn,np,nn,nn,np,np,np,np,nn,nn,nn,np,np,np,nn,np,nn,np,np,nn,np,nn,nn	TGCAGGGTTAACGATGCCCGCGGTGGCGCGCGGTGGGCCTGACCGAGAAGACGCCACTTGGGTTACGGGGTGGAGGGTGTTGGGGCAGAGGCCGT	scaffold_6442	100	95	0	0	1	95		5557	5463	1e-46	188
scf5169	II	40.579	<nnxnp>,(nn,np),nn,nn,nn,--,np,--,np,--,nn,np,--,nn,nn,nn,nn,--,--,np,nn,nn,nn,--,nn,np,nn,nn,--,nn,--,np	TGCAGGTGGCTTGACAGAAAATATATCTCATGTAGAAAATGTTACTTTTTAGCTTCATTATATATTGTAAACACAGTTCCTGTCTGTTATCTATT	scaffold_5169	100	95	0	0	1	95		8909	8815	1e-46	188
scf1568	II	41.838	<nnxnp>,(nn,np),nn,nn,nn,np,NP,np,np,np,nn,np,nn,nn,nn,nn,nn,np,np,np,nn,nn,nn,np,nn,np,nn,nn,np,nn,np,np	TGCAGGGACCTGTTTTCACTCATGACTAATGTGTAAGAGATTCTCGCAACATTTTTCATACAGTGTATGATATATTTTTTCAATAACATTGAAAA	scaffold_1568	100	95	0	0	1	95		1588	1494	1e-46	188
scf3274.1	II	41.838	<nnxnp>,(nn,np),nn,nn,nn,np,np,np,np,np,nn,np,nn,--,nn,nn,nn,np,np,np,nn,nn,nn,np,nn,np,nn,nn,np,nn,np,np	TGCAGGTTCGCGTGGATTTTTTCCCCCCTCCGGTTTTGTTTGTTTGTTTGACACTTGGGAGCGACGCAGCGCCGACTGCTGTCCAGCAGCGGCAA	scaffold_3274	100	95	0	0	1	95		15340	15434	1e-46	188
scf3274.2	II	41.838	<nnxnp>,(nn,np),nn,nn,nn,np,np,np,np,np,nn,np,nn,nn,nn,nn,nn,np,np,np,nn,nn,nn,np,nn,np,nn,nn,np,nn,np,np	TGCAGGGAGAGAATTTGCAAACTCAAAATATACAGCAGCAGGCGTCAGGGGTCGGGATCGTAACCCACGCCGTCCTGTGTACCAGGCGAGGTAGT	scaffold_3274	100	95	0	0	1	95		15343	15249	1e-46	188
scf3791	II	44.596	<nnxnp>,(nn,np),nn,nn,nn,np,np,np,np,np,nn,nn,nn,nn,nn,nn,nn,np,np,np,nn,nn,nn,np,nn,np,nn,nn,np,nn,np,np	TGCAGGTGAGCGCATGGATTCATAGCAAGGCTGGCATTTGGTTAGAAGAGACGCCCTGCTTAATATGCCATCGCTCAGAACTGCAGCCAACATTA	scaffold_3791	100	95	0	0	1	95		20872	20778	1e-46	188
scf1795	II	47.355	<lmxll>,(ll,lm),lm,lm,--,ll,lm,ll,lm,ll,ll,lm,ll,ll,ll,lm,lm,ll,ll,lm,ll,ll,lm,ll,lm,lm,lm,lm,ll,ll,ll,lm	TGCAGGAATAACTGGCAAATCGGCTTTGACAAATTTAGTGTTATTATAAACTAAATGTGGAAATATGCCACGATTATTTTTAACACATAAAAGGT	scaffold_1795	100	95	0	0	1	95		26740	26646	1e-46	188
scf1906	II	47.355	<hkxhk>,(hh,hk,kk),kk,hk,kk,hh,hk,hh,hk,hh,hk,kk,hk,hk,hk,kk,kk,hh,hh,hk,hk,hk,kk,hh,kk,hk,kk,kk,hh,hk,hh,hk	TGCAGGGGGAAGCCCTCAGCGGCCCTTCTTCCTCCGCGTTTCACCCGATCTTCTACCTCTGGCCACGATCCCCACACCCTGGCCCTCAATACCGC	scaffold_1906	100	95	0	0	1	95		8245	8151	1e-46	188
scf24775	II	47.355	<lmxll>,(ll,lm),lm,lm,lm,ll,lm,ll,lm,ll,ll,lm,ll,ll,ll,lm,lm,ll,ll,lm,ll,ll,lm,ll,lm,lm,lm,LM,ll,ll,ll,lm	TGCAGGGCAATGTTTCTACAGGAGGGCGGCAACGATAGTTACGATCGGCTGTAGGAGGAATCGAATTGATTCCTGAATATTTATTTCGACCACTG	scaffold_24775	100	95	0	0	1	95		6056	6150	1e-46	188
scf24828	II	47.355	<nnxnp>,(nn,np),np,nn,np,nn,nn,nn,nn,nn,np,np,np,np,np,np,np,nn,nn,nn,np,np,np,nn,np,nn,np,np,nn,np,nn,nn	TGCAGGTCACGAAAGTTTTAAGTCAAAAAATGAGACAGCAGTTTTACTGAATAATTCAATTGCTTGGCGACGCGCTCATACGCATACGTATGTTT	scaffold_24828	100	95	0	0	1	95		51513	51419	1e-46	188
scf691	II	47.355	<lmxll>,(ll,lm),lm,lm,lm,ll,lm,ll,lm,ll,ll,lm,ll,ll,ll,lm,lm,ll,ll,lm,ll,ll,lm,ll,lm,lm,lm,lm,ll,ll,ll,lm	TGCAGGGTGCACGCACACAGGGGTCGCGCAGAGGTTACGCAGTGGCCACGCAGGGGTTATGCAGGGATCACGGTGAGCAGAGCAAAAACACAATT	scaffold_691	98.95	95	1	0	1	95		81866	81772	2e-44	180
scf691.1	II	47.355	<lmxll>,(ll,lm),lm,--,lm,ll,lm,ll,lm,ll,ll,--,ll,ll,ll,lm,lm,ll,ll,lm,ll,ll,lm,ll,--,lm,lm,lm,--,ll,ll,lm	TGCAGGATTTCTGCCGACGTTCGGCCCGGCGTGGGTCAACATGTACGGCTCGACGCGGAACTACACGCTCATGGACGAGCACCAGGAGCTGAATG	scaffold_691	98.95	95	1	0	1	95		16539	16633	2e-44	180
scf24828.1	II	49.089	<nnxnp>,(nn,np),NP,nn,--,nn,nn,nn,nn,nn,nn,np,np,np,NP,np,--,nn,nn,nn,np,--,np,nn,np,nn,--,np,nn,np,nn,nn	TGCAGGAATTCATATTCTTTGGTTCTTTCGGTAAAGTCACGTAGATAGAAAAAATAAGAATGAAAATAACAATATAAATATAGAAGTATATTTAT	scaffold_24828	100	95	0	0	1	95		51510	51604	1e-46	188
20622	II	50.822	<efxeg>,(ee,ef,eg,fg),ef,fg,ef,eg,fg,--,fg,--,ee,ef,ee,ee,ee,ef,ef,eg,--,fg,ee,ee,ef,eg,ef,fg,ef,ef,eg,ee,eg,fg	TGCAGGGGGATGTCATTGTCCCGTCGGCCTCCCAGCAGCATGCACCCCTGAAAGCGTTAAGGACAATGCGTGGCCGTGATGTACGATAGCGGTCA
scf24828.2	II	50.822	<nnxnp>,(nn,np),np,nn,np,nn,nn,nn,nn,nn,np,np,NP,np,np,np,np,nn,nn,nn,np,np,np,nn,np,nn,np,np,nn,np,nn,nn	TGCAGGGGTATCAGAGCTTAGGAAGACACCGGGGGTGTAGAGTTTATTAAAACATGCGTTTGGAGACAGGTAAACAAAGTCAAGTCAATCAGTGA	scaffold_24828	100	95	0	0	1	95		67745	67651	1e-46	188
scf840	II	50.822	<hkxhk>,(hh,hk,kk),--,hk,kk,hh,hk,hh,hk,hh,hk,kk,hk,hk,hk,kk,kk,hh,hh,hk,hk,hk,kk,hh,kk,hk,kk,kk,hh,hk,hh,hk	TGCAGGCTCTTGAGGCCCTCCTCCACATCCTTTGCCTCTTTGAAGAACTAAAAGTGCCAAGCGAGCCTCCGTGTTACAGCAGCACGAGAAAAGGG	scaffold_840	98.95	95	1	0	1	95		88811	88717	2e-44	180
scf4244	II	54.846	<nnxnp>,(nn,np),np,nn,np,nn,nn,nn,nn,nn,NP,np,np,np,np,np,np,nn,nn,nn,np,np,np,nn,np,NP,--,NP,nn,np,nn,nn	TGCAGGGCAGTACAACAAGTAGGTTTATTTTTATACTTAAAACTTTCCTGACTGCAGGAATTCATATTCTCTTTATTTCGGTAAAGTCACGTAGA	scaffold_4244	100	95	0	0	1	95		5039	4945	1e-46	188
scf1499	II	57.109	<lmxll>,(ll,lm),ll,ll,ll,lm,lm,lm,ll,LM,lm,ll,lm,lm,lm,ll,ll,lm,lm,ll,lm,lm,lm,lm,ll,ll,ll,ll,lm,lm,lm,ll	TGCAGGGCTCGTTAAAAGTTTCTCTTTCGCCTGTGTCCCCTTGCCCGCCCGCCCGCCGCAGCTCGTAATAACAAGAGTAGTTGTCGTGATGATAA	scaffold_1499	98.95	95	1	0	1	95		23127	23221	2e-44	180
scf475.2	II	60.14	<lmxll>,(ll,lm),ll,ll,ll,lm,lm,lm,ll,lm,lm,ll,lm,lm,lm,ll,LM,lm,lm,ll,lm,lm,lm,lm,ll,ll,ll,ll,lm,lm,lm,ll	TGCAGGGGGGAATATCACGAGTTTCTTCACTGCCCCCAGTCCAAAATACTGTAAGGAGTTGTGAGTGATAGTGGCCATGCATCTGCTGCACTGAA	scaffold_475	98.95	95	1	0	1	95		47553	47647	2e-44	180
scf1630	II	63.17	<lmxll>,(ll,lm),lm,LM,lm,ll,ll,ll,lm,ll,ll,lm,ll,ll,ll,lm,lm,ll,ll,lm,ll,ll,ll,ll,lm,lm,lm,lm,ll,ll,ll,lm	TGCAGGGCAGAGCTGAAAGAGCTCCCCAGTACAAGTAACCAGCTTGGACTGTGAAGAACTTGCAGGACTTCACGCGGCAGCTGAACAACCGTGGC	scaffold_1630	98.95	95	1	0	1	95		8980	8886	2e-44	180
scf2041	II	63.17	<hkxhk>,(hh,hk,kk),HK,hk,kk,hh,hh,hh,hk,hh,hk,hk,hk,hk,hk,kk,kk,hh,hh,hk,hk,hk,hk,hh,kk,kk,kk,kk,hh,hk,hh,hk	TGCAGGAGACTGGGTTTCAGGAGGAGGCTTGGGTTCAGCAGAGACTTATGACCAGTGCTTAGCTTAGCCAGAGCAGTCCGGAACACTGTTCCGGG	scaffold_2041	98.95	95	1	0	1	95		16401	16307	2e-44	180
scf3531	II	63.17	<lmxll>,(ll,lm),ll,ll,ll,lm,lm,lm,ll,lm,lm,ll,lm,lm,lm,ll,ll,lm,lm,ll,lm,lm,lm,lm,ll,ll,ll,ll,lm,lm,lm,ll	TGCAGGCTAGAGCCGTCCATAGCAATAATGTAAGACCCTTGAGCCCTATGGTCAAAACCCATATGACCTGGGAAGCATAAAACATTTAACACAGT	scaffold_3531	100	95	0	0	1	95		14267	14361	1e-46	188
scf475	II	63.17	<lmxll>,(ll,lm),ll,ll,ll,lm,lm,lm,ll,lm,LM,ll,lm,lm,lm,ll,ll,lm,lm,ll,lm,lm,lm,lm,ll,ll,ll,ll,lm,lm,lm,ll	TGCAGGAGGCCCAGGACCGGCTCAGATAATCCCCAACTGGTGTTAGCCGTGTGTGGGAATTGAACTAGGGTGGCCGAGTTCATAGCGCAGCGCTC	scaffold_475	100	95	0	0	1	95		104878	104972	1e-46	188
scf475.1	II	63.17	<lmxll>,(ll,lm),ll,ll,ll,lm,lm,lm,ll,lm,lm,ll,lm,lm,lm,ll,ll,lm,lm,ll,lm,lm,lm,lm,ll,ll,ll,ll,lm,lm,lm,ll	TGCAGGTCGATTCAGCCTCCAATGAGTACATGGCCCAGTGTGTACACATCGCAAATAAGGATACAAAGGTGACCGGGCGTGGTGTTGGCCACTCC	scaffold_475	98.95	95	1	0	1	95		104881	104787	2e-44	180
scf1309	II	71.816	<lmxll>,(ll,lm),lm,lm,lm,ll,ll,ll,LM,ll,ll,lm,ll,ll,ll,lm,lm,ll,ll,lm,ll,lm,ll,ll,lm,lm,lm,ll,ll,ll,ll,lm	TGCAGGTTTCCAAGGGTAATATTTTATACTACCTTTTAATTTATCAACAATTCAACCAGCACGTTTGTGACCAGTTAAAAAGCAATTATATTGGA	scaffold_1309	100	95	0	0	1	95		19697	19791	1e-46	188
scf1309.1	II	71.816	<lmxll>,(ll,lm),lm,lm,lm,ll,ll,ll,lm,ll,ll,lm,ll,ll,ll,lm,lm,ll,--,lm,ll,lm,ll,ll,lm,--,lm,ll,ll,ll,ll,lm	TGCAGGCTGATGAATTAAATGTTATTCCTTTTAGTAATTTAAACAAACCAGTTTCATTACAAACCAATATATAAAAAAATGCATCCCTGATCAAA	scaffold_1309	100	95	0	0	1	95		19700	19606	3e-34	147
scf1552	II	80.462	<nnxnp>,(nn,np),nn,np,nn,nn,nn,np,np,NP,nn,np,nn,nn,nn,np,nn,np,np,np,nn,nn,nn,np,nn,nn,nn,nn,nn,nn,np,np	TGCAGGAAGAGATGTGTCACCTGCGTACGGAAACGGGAGTTTCCACCACAAGCTCAATGTGGAAATGTAATATTCCCATGTCAGCCTCGGTATCT	scaffold_1552	98.95	95	1	0	1	95		55644	55550	2e-44	180
scf743	II	80.462	<efxeg>,(ee,ef,eg,fg),ee,eg,ef,ef,ef,fg,eg,fg,ef,eg,ef,ef,ef,eg,ee,eg,fg,eg,ef,ee,ef,fg,ee,ee,ee,ef,ef,ef,fg,eg	TGCAGGCTGTAGTCAGCTAATTGCAGATTATTTTTGGCCACCAGCGACTACGACAAAAAACATCGTGAAGTTTGTTTTAAAATATTTGATGTTCA	scaffold_743	98.91	92	1	0	1	92		35497	35588	1e-42	174
scf1229	II	81.325	<lmxll>,(ll,lm),lm,lm,ll,ll,ll,ll,lm,ll,ll,lm,ll,ll,ll,lm,lm,lm,ll,lm,ll,lm,ll,ll,lm,lm,lm,ll,ll,ll,ll,lm	TGCAGGACGGTGTTTGATTGTCCCCCCTTTCATGTCGCATGTCCAATCCAACTGCAGTTTCCTTCCACTGTTTGTCAAACGGTGGGTCACGTTCT	scaffold_1229	100	95	0	0	1	95		80980	81074	1e-46	188
scf29.3	II	81.325	<lmxll>,(ll,lm),lm,lm,ll,ll,ll,ll,lm,ll,ll,lm,ll,ll,ll,lm,lm,lm,ll,lm,ll,lm,ll,ll,lm,lm,lm,ll,ll,ll,ll,lm	TGCAGGGCTGCACCTTTTGCCTTATATTTACTGCCCCACGTGCAGTGTCTCCACAGCCTCACAGCAATCCTGCAGAACGATCTTATCCTATAACA	scaffold_29	98.95	95	1	0	1	95		376921	376827	2e-44	180
scf1024.1	II	82.187	<hkxhk>,(hh,hk,kk),hk,hk,hk,HK,hk,hh,hk,hh,hk,hk,hk,hk,hk,hk,kk,hk,hh,hk,hk,kk,hk,hh,kk,kk,kk,hk,hk,hk,hh,hk	TGCAGGTAAATCAGAGTCCTTTTCGTCCGGGCTTCGCATGCGGGTCGTTCTTTTTCTTGTTTACATTTTTTCAAGCACTTCTGACTCCAGTTGTA	scaffold_1024	97.89	95	2	0	1	95		87414	87320	6e-42	172
56305	II	85.646	<efxeg>,(ee,ef,eg,fg),ee,ee,fg,fg,fg,ef,ee,ef,fg,ee,FG,fg,--,ee,eg,ee,ef,ee,--,ee,fg,ef,eg,eg,eg,fg,fg,fg,ee,ee	TGCAGGGAGTAGTAGAAGAGCAGGCCGCTTGGCTGCATGGTGCGGAACGTGAGCCCCGTCTCCAGCACGGGGAAGGGCTCCTTGACGGCCAGCGA
scf4493	II	87.379	<hkxhk>,(hh,hk,kk),kk,kk,hh,hh,hh,hk,kk,hk,hh,kk,hh,hh,hh,kk,hk,kk,hk,kk,hh,kk,hh,hh,hk,hk,hk,hh,hh,hh,kk,kk	TGCAGGGGGTTATTGCATCATTAATGCATCATTGGTCGCTTCTAATCACACCGATCATGGTTTGAGTGTGTCCAGGCTCAAACAAGCAGGGTGGC	scaffold_4493	100	95	0	0	1	95		16656	16562	1e-46	188
scf14681	II	88.235	<hkxhk>,(hh,hk,kk),--,hh,kk,kk,kk,hk,hh,hk,kk,hh,kk,kk,kk,hh,hk,hh,hk,hh,kk,hh,kk,kk,hk,hk,hk,kk,kk,kk,hh,hh	TGCAGGCAGTCCTTAAAGATGTTTTAGTCTCGTGAACGATGCTTCTGAATCGCGGGTCCACGTCCGTGCGCGTGCAAAATAATGGAGCCGGTGGA	scaffold_14681	98.95	95	1	0	1	95		2528	2434	2e-44	180
scf1670.2	II	88.655	<lmxll>,(ll,lm),ll,ll,lm,lm,lm,lm,ll,lm,lm,ll,lm,lm,lm,ll,ll,ll,LM,ll,--,ll,lm,lm,ll,ll,ll,lm,lm,lm,ll,ll	TGCAGGTTGTGATGTTGCGAGCCGCAACATCACGCCGCGCGATGCGCGTCAAAATCCACTGCTGTGCTGTACTTCCGTGCTCCCCAACCTTCACC	scaffold_1670	97.89	95	2	0	1	95		184284	184378	6e-42	172
scf11924	II	89.074	<hkxhk>,(hh,hk,kk),hk,kk,hh,hh,hh,hk,kk,hk,hh,kk,hh,hh,hh,kk,hk,kk,hk,kk,hh,kk,hh,hh,hk,hk,hk,hh,hh,hh,kk,kk	TGCAGGTCACGAAAGCTTCAAATCTAGATTCAATAAAATTGGCCATGTCATTAAAGCTGAACTTGAAACTCATTCGGATCTCTCACGCAGAGAAG	scaffold_11924	97.89	95	2	0	1	95		6544	6450	6e-42	172
scf4493.1	II	89.074	<hkxhk>,(hh,hk,kk),HK,hh,kk,kk,kk,hk,hh,hk,kk,hh,kk,kk,kk,hh,hk,hh,hk,hh,kk,hh,kk,kk,hk,hk,hk,kk,kk,kk,hh,hh	TGCAGGCATTTCAACAGAAGCCTTTTTACGATCCACTTTCATCCGATGAGACTTGTTATTGAATCCCGTTGAGAGGTTTTGTTCTGACGAAGGTT	scaffold_4493	97.89	95	2	0	1	95		16653	16747	6e-42	172
scf10454	II	90.799	<nnxnp>,(nn,np),nn,nn,np,np,np,nn,nn,nn,np,nn,np,np,np,nn,np,nn,nn,nn,np,nn,np,np,np,np,np,np,np,np,nn,nn	TGCAGGTGGCTCGCAAACCGGCAGTAGAAATCCCATTTTCTTACCACCAAAAGAGTTATCATTCTATGGATCCCAGAGGAATGATGGGCTGAGTC	scaffold_10454	98.95	95	1	0	1	95		48366	48272	2e-44	180
scf1469	II	92.726	<lmxll>,(ll,lm),ll,--,lm,lm,lm,lm,ll,--,lm,ll,--,lm,lm,ll,ll,ll,--,ll,lm,ll,lm,lm,ll,ll,ll,lm,lm,lm,ll,ll	TGCAGGACCGTGGGCTCCCACTGAGGCACCTCGTGGCCAATCTGGCTGGCACCGAGCCGGTGGCCCCAAACGTCCACGGAGAGCGCCTCCTCTGT	scaffold_1469	100	95	0	0	1	95		47115	47209	1e-46	188
scf3166	II	96.378	<hkxhk>,(hh,hk,kk),kk,kk,hh,hh,hh,hk,hk,hk,hh,kk,hh,hk,hh,kk,hk,kk,hk,hk,hh,kk,hh,hh,hk,hk,hk,hh,hh,hh,kk,kk	TGCAGGTCAGTCGGTGTGTGTGAACAGTCACGGAACGCGACCATTACCGCTCGAATCTAATTTGGAAAGGGTGGGGGGCCGAGCCTTCAACAGGG	scaffold_3166	100	95	0	0	1	95		33460	33366	1e-46	188
scf3932.1	II	96.378	<nnxnp>,(nn,np),nn,nn,np,np,np,nn,NP,nn,np,nn,np,nn,np,nn,np,nn,nn,np,np,nn,np,np,np,np,np,--,NP,np,nn,nn	TGCAGGCACACGGGAGGCAGACTTCTGAGGCGCGTTCACATGTGACCACATCACAGGTTCGTCGGATACATTCAATACAGGCCGCTCTGGGATGG	scaffold_3932	100	95	0	0	1	95		19308	19214	1e-46	188
scf423	II	96.378	<lmxll>,(ll,lm),ll,ll,lm,lm,lm,lm,ll,lm,lm,ll,lm,lm,lm,ll,ll,ll,lm,ll,lm,ll,lm,lm,ll,ll,ll,lm,lm,lm,ll,ll	TGCAGGCCCTGATAAGGTATGTGGGCGATGAGGCCTTGCTGAATCATGCACAGTGCTCATGAGTTATGATCTTTGGAAAGGCCCACGTTTCCATC	scaffold_423	98.95	95	1	0	1	95		312017	312111	2e-44	180
scf423.1	II	96.378	<lmxll>,(ll,lm),ll,ll,lm,lm,lm,lm,ll,lm,lm,ll,lm,lm,lm,ll,ll,ll,lm,ll,lm,ll,lm,lm,ll,ll,ll,lm,lm,lm,ll,ll	TGCAGGTGGGTGTTAGTCTGCCTGTAAGGGGCGTGGTTAATAGGCGGCTATCATTTGTTAGTGATTTATTAAATCTCCAAAATGTGGACCATGAT	scaffold_423	100	95	0	0	1	95		270771	270677	1e-46	188
scf492.2	II	96.378	<nnxnp>,(nn,np),nn,--,np,np,np,nn,np,nn,np,nn,np,nn,np,nn,np,nn,nn,np,np,--,np,np,np,np,np,np,np,np,nn,nn	TGCAGGTGAGGGCAGTCGCACGTGACCCCGATGACGATGGGGGCGCGTGTTGCCAATTCAAATGGCGATGCAGCCAAAGGAAAGTCAGCGGGGCC	scaffold_492	98.95	95	1	0	1	95		717869	717775	2e-44	180
scf492.3	II	96.378	<nnxnp>,(nn,np),nn,nn,np,np,np,nn,np,nn,np,nn,np,--,np,nn,np,nn,nn,np,np,nn,np,np,np,np,np,np,np,np,nn,nn	TGCAGGATCGGTCCCCCGCTATGTGTGTTGAGCCCATCCCACCATCCTGACAATGCAAGATTTTGTGGGTCGACTCTCCTAAGTTGCAGCATCAT	scaffold_492	100	95	0	0	1	95		726835	726741	1e-46	188
scf6895	II	96.378	<nnxnp>,(nn,np),nn,nn,np,np,np,nn,np,nn,np,nn,np,--,np,nn,np,nn,nn,np,np,--,--,np,np,np,np,np,np,np,nn,nn	TGCAGGCAGGCTCCAATGTCGAAGCCGAGGTGGCGATGGTTGAGTCCCGGTGGAGCAGCAGATGAGCGTGGATGCTCCGAGCTGCTCGCAACGAG	scaffold_6895	100	95	0	0	1	95		8955	8861	1e-46	188
scf750	II	96.378	<hkxhk>,(hh,hk,kk),hh,hh,kk,kk,kk,hk,hk,hk,kk,hh,kk,hk,kk,hh,hk,hh,hk,hk,kk,hh,kk,kk,hk,hk,hk,kk,kk,kk,hh,hh	TGCAGGTGGCAGAGAACCACGCTACGCTGGTGCGCTATACTGGGCTGCTGCAGAACCTGACGGTGCGCGTGGAGCGAATGGAGCAGGGCCATGAC	scaffold_750	100	95	0	0	1	95		64269	64175	1e-46	188
scf750.1	II	96.378	<hkxhk>,(hh,hk,kk),kk,kk,hh,hh,hh,hk,hk,hk,hh,kk,hh,hk,hh,kk,hk,kk,hk,hk,hh,kk,hh,hh,hk,hk,hk,hh,hh,hh,kk,kk	TGCAGGGTCTCGAGTAGTTGGTGCAGGCGCTGAGGTGCCTCCGGAGGCTGTGGTGGCAGTTCCCCAAACAATAGGTTGCCGGGAAGTCAGGGCTC	scaffold_750	100	95	0	0	1	95		53864	53958	1e-46	188
scf7880	II	96.378	<nnxnp>,(nn,np),nn,--,np,np,np,nn,np,nn,--,nn,np,nn,np,nn,NP,--,nn,np,np,nn,np,np,np,np,np,NP,np,np,nn,nn	TGCAGGACACCACGTGTGAGCGCCCGCCTCGCCGCCCTCGCCGCGCTCACCCTCCTCACCATCCTCACCCACCTCACCATTCGCACCGCCTTTAT	scaffold_7880	100	95	0	0	1	95		13116	13022	1e-46	188
scf8345.3	II	96.378	<nnxnp>,(nn,np),nn,nn,np,np,np,nn,np,nn,np,nn,np,nn,np,nn,np,nn,nn,np,np,nn,np,np,np,np,np,np,np,np,nn,nn	TGCAGGCATGACTAAGCCCCGCCTCCGACCACGCCCTCTCGTGGAACTTTCCACCAGGTTCCCGGAGCATCTCGGCTAACCCCTCCTGTTACCTT	scaffold_8345	98.95	95	1	0	1	95		6937	6843	2e-44	180
scf300	II	123.075	<lmxll>,(ll,lm),lm,lm,ll,lm,ll,lm,lm,ll,ll,lm,ll,ll,ll,lm,lm,lm,lm,lm,ll,lm,lm,ll,lm,lm,lm,ll,ll,ll,lm,lm	TGCAGGTCACATCTGTAACCCGCTTTACATACACGGTGGCGCATTGGTATATAAGGATGAAATGCGCCTTTAAAATTTAAATGATTATTCCTAAC	scaffold_300	100	95	0	0	1	95		216950	216856	1e-46	188
scf300.1	II	123.075	<lmxll>,(ll,lm),lm,lm,ll,lm,ll,lm,lm,ll,ll,lm,ll,ll,ll,lm,lm,lm,lm,lm,ll,lm,lm,ll,lm,lm,lm,ll,ll,ll,lm,lm	TGCAGGGCACACGGCCAGGACTAGGGGGTGGTAAAGGCCACTTTAAAAAGGTGAGTTTTCAAGACAGACTTAAATAGCTCTCACGACTCTGATTG	scaffold_300	100	95	0	0	1	95		216947	217041	1e-46	188
scf17387	II	129.075	<hkxhk>,(hh,hk,kk),HK,hk,kk,hk,hk,hh,hh,hk,kk,hh,kk,kk,kk,hh,hk,hk,hh,hk,kk,hk,hh,kk,hk,hh,HK,kk,kk,kk,hh,hk	TGCAGGTTGACCTGCACTCCTAACTCCGCACCTTAAAGAGACCACGCGACTCCACAACAGCAAGATCCCAGGATAATTATGGTCGGGCTGTCCCC	scaffold_17387	98.95	95	1	0	1	95		2792	2698	2e-44	180
scf2070	II	134.494	<hkxhk>,(hh,hk,kk),hk,hk,kk,kk,hk,hh,hh,hk,kk,hh,kk,kk,kk,hh,hk,hk,hh,--,kk,hk,hh,kk,hk,hh,hk,kk,kk,hk,hk,hk	TGCAGGGTTTCCCAAACTCCAGTTGAGTACTATAGATAGTATGTAAATATATCTCATTGTTTGGGATTTTCTGATTTTATGTTGAACGTTAACGT	scaffold_2070	98.95	95	1	0	1	95		194741	194647	2e-44	180
scf4349	II	134.494	<lmxll>,(ll,lm),ll,lm,ll,ll,ll,lm,lm,ll,ll,lm,ll,ll,ll,lm,lm,lm,lm,lm,ll,lm,lm,ll,lm,LM,lm,ll,ll,ll,lm,lm	TGCAGGCGCTGCAGGATTTCAGTCCTTCACGGCAGAGTGTGGTACCACTGTAGAGGTGTTAACTACGCGCTGTTGCATAACCTGCATTGCCACCA	scaffold_4349	100	95	0	0	1	95		19009	19103	1e-46	188
scf5147	II	134.494	<hkxhk>,(hh,hk,kk),hk,hk,kk,kk,hk,hh,hh,hk,kk,hh,kk,kk,kk,hh,hk,hk,hh,hk,kk,hk,hh,kk,hk,hh,hk,kk,kk,hk,hk,hk	TGCAGGGTAACGGGGCTGTCCAGACGATCCTGTTCGGGGACTCCTAAGGTAGGGCCCCCATCCAGTAGCTCCTGGATAGCCTCGTTTGTATGGTT	scaffold_5147	100	95	0	0	1	95		19710	19616	1e-46	188
scf5147.1	II	134.494	<lmxll>,(ll,lm),ll,lm,ll,ll,ll,lm,--,ll,ll,lm,ll,ll,ll,lm,lm,lm,lm,lm,ll,lm,lm,ll,lm,lm,lm,ll,ll,ll,lm,lm	TGCAGGAGCTGCACACCGATGTGAAAGGGCTCGCAGCTGGTAAAGCCCCGGGGATTGACGGCCTGCCGGTTGAGTTTTATGTAGCCTTCTGGGAT	scaffold_5147	100	95	0	0	1	95		19707	19801	1e-46	188
13514	II	136.219	<efxeg>,(ee,ef,eg,fg),eg,ef,ee,ee,--,fg,fg,eg,ee,fg,ee,ee,ee,fg,ef,ef,fg,ef,ee,ef,fg,ee,ef,--,ef,ee,ee,eg,ef,ee	TGCAGGGAAAGTGGCCAGAACTAGGGCGTAAAGGCCAGTTTAAATAGGTGAGTTTTCATGACAGATTAAAATATATCGAAGCATTACCTCCTCAA
scf24957	II	136.219	<hkxhk>,(hh,hk,kk),hk,hk,hh,hh,hk,kk,kk,hk,hh,kk,hh,hh,hh,kk,hk,HK,kk,hk,hh,hk,kk,hh,HK,kk,hk,hh,hh,hk,hk,hh	TGCAGGCGAAATATGGAAGCAAAAACAGGCGAGTTGCCAACACGTGGACACGGAGGAGAGTGGAAAAGTGAAAATGGTTGGAGTAAAATCTTGAT	scaffold_24957	98.95	95	1	0	1	95		8572	8478	2e-44	180
scf10011	II	136.669	<nnxnp>,(nn,np),np,nn,nn,nn,np,np,np,np,nn,np,nn,nn,nn,np,nn,nn,np,nn,nn,nn,np,nn,nn,np,nn,nn,nn,np,nn,nn	TGCAGGCCATGCTGGGGCACGGAGGCAACGCTGAGATGCGCGGCCACGACGACGAGGATGAGGATGACGTCGACGACGATCTGGATGAGGACGAC	scaffold_10011	100	95	0	0	1	95		5311	5405	1e-46	188
scf1612	II	136.669	<nnxnp>,(nn,np),np,nn,nn,nn,np,np,NP,np,nn,np,nn,nn,nn,np,nn,nn,np,nn,nn,nn,np,nn,nn,np,nn,nn,nn,np,nn,nn	TGCAGGGTCGTCTTGATGCAGAGCGCCACGTCTTCAAGGCGCAGCTCCGGGACCTGCGGCAGAACCGACCCAAACCGCACGCTCAAGCTCAGCCA	scaffold_1612	98.95	95	1	0	1	95		14810	14716	2e-44	180
scf4543	II	136.669	<nnxnp>,(nn,np),np,nn,nn,nn,np,np,np,np,nn,np,nn,nn,nn,np,nn,nn,np,nn,nn,nn,np,nn,nn,np,nn,nn,nn,np,nn,nn	TGCAGGGCGCCGCTCGCCTGCTGCGCACGCAAACAGAGGCCAAGGTGTGGTCCTCCCGCTACCGCACGTGTAGCCTTGAACAGACTGTTGGGGCA	scaffold_4543	98.95	95	1	0	1	95		10589	10495	2e-44	180
scf578	II	137.119	<efxeg>,(ee,ef,eg,fg),eg,ef,ee,ee,eg,fg,fg,eg,ee,fg,ee,ee,ee,fg,ef,ef,fg,ef,ee,ef,fg,ee,ef,fg,ef,ee,ee,eg,--,ee	TGCAGGAGTCACATCGCAGTAGACCATTACAACACATACAAATAATAACATCCCTTCTTTAACACGTGGAATGCAATAATCAATATCGTTGAATA	scaffold_578	100	95	0	0	1	95		40298	40392	1e-46	188
scf2214	II	137.914	<efxeg>,(ee,ef,eg,fg),eg,ef,ee,ee,eg,fg,fg,eg,ee,fg,ee,ee,ee,fg,ef,ef,--,ef,ee,ef,fg,ee,ef,fg,ef,ee,ee,eg,ee,ee	TGCAGGAGGAGGAGGAGACGACATTAGGATGAGGGCCGCCGAGTTGAGGTGGCGTCAACAGTGGTGGCGGTGACACGGAGGCAAGAGGTTATACA	scaffold_2214	97.89	95	2	0	1	95		36505	36599	6e-42	172
scf459	II	140.063	<nnxnp>,(nn,np),np,nn,nn,nn,NP,np,np,--,nn,np,nn,nn,nn,np,nn,nn,np,nn,nn,nn,np,nn,np,np,nn,nn,nn,np,nn,nn	TGCAGGAAACGGCATGAAAGCGTGGCCTCGCAAAGTCCGGTCCTCATTTTTTTTACATTTGCTAATCTACCCACACCTCCAATTAACGTGCGCGA	scaffold_459	100	95	0	0	1	95		54361	54267	2e-32	141
scf459.1	II	140.063	<nnxnp>,(nn,np),np,nn,nn,nn,np,np,np,np,nn,np,nn,nn,nn,np,nn,nn,np,nn,nn,nn,np,nn,np,np,nn,nn,nn,np,nn,nn	TGCAGGGACCTGTTATAACGTATTGGCGGTACATCGGTGCGCGGTATAAAAACAAAGCAAACATTTCGCAATCATTGTTTATCTTGCGGGGTGGT	scaffold_459	97.89	95	2	0	1	95		3940	3846	6e-42	172
scf459.2	II	140.063	<nnxnp>,(nn,np),np,nn,nn,nn,np,np,np,np,nn,np,nn,nn,nn,np,nn,nn,np,nn,nn,nn,np,nn,np,np,nn,nn,nn,np,nn,nn	TGCAGGTGTGAAATGTTACTGTGCAAACCTGCTGCCCTTTGTCAATCCACTGCTGGAGGAAGGCCTCCGCACACTGTGTTGGTCATGGTGGTTGT	scaffold_459	100	95	0	0	1	95		54358	54452	1e-46	188
scf310.1	II	142.211	<nnxnp>,(nn,np),np,nn,nn,nn,np,np,np,np,nn,np,nn,nn,nn,np,nn,nn,np,nn,nn,nn,nn,nn,np,np,nn,nn,nn,NP,nn,nn	TGCAGGCGTAAACCTTACTCTTTAGCACCCAGATGTAAAAAAAAAAGTTAAAAGTGCAGCCCTACAATTGCTTGCTCATGTGACTGCTGGTAAAA	scaffold_310	100	95	0	0	1	95		209637	209731	8e-29	129
scf310.2	II	142.211	<nnxnp>,(nn,np),np,nn,nn,nn,np,np,np,np,nn,np,nn,nn,nn,np,nn,nn,np,nn,nn,nn,nn,nn,np,np,nn,nn,nn,np,nn,nn	TGCAGGGTAATGTCGTCTTTTAGCCGGGCGCGGGTTGAACTGGAGTTCCGATTCGAGAACGAAGTTCTTCGCTCACCAAGCAGAGACGCCGAGCT	scaffold_310	100	95	0	0	1	95		223419	223325	1e-46	188
57606	II	146.666	<efxeg>,(ee,ef,eg,fg),fg,ee,ef,ef,fg,eg,ee,fg,ef,eg,ef,ef,ef,eg,ee,ee,eg,ee,ef,ee,ee,ef,eg,eg,eg,ef,ef,fg,ee,ef	TGCAGGGAGCGGGTGAGCACAGCGAGGATTTACGCGTTTAAAACGCGTAAGGCTTTCACTGACCGACATTACGAATCGTGGTTTGATTTGTGTGT
scf1337.2	II	146.666	<nnxnp>,(nn,np),nn,np,np,np,nn,nn,np,nn,np,nn,--,np,np,nn,np,np,nn,np,np,np,np,np,nn,nn,nn,np,np,nn,np,np	TGCAGGTTATGTTTATTTCTATGCATGGCACATCGGGATCTATGAATGAAATGTACCACTTTACAAATCTAAATTATTATTCGTAATACTGGTAG	scaffold_1337	100	95	0	0	1	95		60490	60396	1e-46	188
scf1337.3	II	146.666	<nnxnp>,(nn,np),np,nn,nn,nn,np,np,nn,np,nn,np,nn,nn,nn,np,nn,nn,np,nn,nn,nn,nn,nn,np,np,np,nn,nn,np,nn,nn	TGCAGGGACCTGTTGATCTGGGATAAATGTTAAGGTAAAGGCTGTAGCCCTGCAAGTGCTTGCTCACGTTACTCATGGCGGAAGGGCTTCTACTA	scaffold_1337	98.95	95	1	0	1	95		78774	78680	2e-44	180
scf1337.4	II	146.666	<nnxnp>,(nn,np),nn,np,np,np,nn,nn,np,nn,np,nn,np,np,np,nn,np,np,nn,np,np,np,np,np,nn,nn,nn,np,np,nn,np,np	TGCAGGTGCAGAATTAAGCACAAGGTTTGCTCTCGCATTTGCCTGGCATTGAGCAGAGAGGGGCAGCCAACCGCTCCGCGCTCGGCGCGACTGTG	scaffold_1337	98.95	95	1	0	1	95		72605	72511	2e-44	180
scf260	II	146.666	<hkxhk>,(hh,hk,kk),hh,kk,hk,hk,hh,hk,kk,hh,hk,hk,hk,hk,hk,hk,kk,kk,hk,kk,hk,kk,kk,hk,hk,hk,hk,hk,hk,hh,kk,hk	TGCAGGGCATACATTAGTGAACACACTTTGTTGGCAAATTCAGCAGGAAGTTTGGAAATTGGAAGATTAGGTGCACCACTCAGCAGAAGTAATAA	scaffold_260	96.84	95	3	0	1	95		281865	281771	1e-39	165
scf260.1	II	146.666	<lmxll>,(ll,lm),lm,ll,lm,lm,lm,ll,ll,lm,lm,ll,lm,lm,lm,ll,ll,ll,ll,ll,lm,ll,ll,lm,ll,ll,ll,lm,lm,lm,ll,lm	TGCAGGTGGACCTTAGTTTGGTCAGTTAGTAGGGGGAGATGCTGCTCTTGGTTAATCCAATGAATCCTTTCCCGTTCCGAGGCATCTGCAAGTTG	scaffold_260	100	95	0	0	1	95		83001	82907	1e-46	188
scf260.2	II	146.666	<lmxll>,(ll,lm),lm,ll,lm,lm,lm,ll,ll,lm,lm,ll,lm,lm,lm,ll,ll,ll,ll,ll,lm,ll,ll,lm,ll,ll,ll,lm,lm,lm,ll,lm	TGCAGGCTGTGATAACCTCTTTGGTGCATGGTGGTAGCCCATCCAAGCATTGTGCAGGCTCGGTCTCTGCTTGGCTTTTGAGATCTGGCAAGATC	scaffold_260	100	95	0	0	1	95		242410	242504	1e-46	188
scf310	II	146.666	<lmxll>,(ll,lm),ll,lm,ll,ll,ll,lm,lm,ll,ll,lm,ll,ll,ll,lm,lm,lm,lm,lm,ll,lm,lm,ll,lm,lm,lm,ll,ll,ll,lm,ll	TGCAGGAGATGGAGACATACGTACATGCATGGATGAATGAATGGACATGGGAGTGGTGAACAAATCCACGAGAGCATCCGTACGTTTGTCAATCG	scaffold_310	100	95	0	0	1	95		78968	78874	1e-46	188
scf3472	II	146.666	<lmxll>,(ll,lm),lm,ll,lm,lm,lm,ll,ll,lm,lm,ll,lm,lm,lm,ll,ll,ll,ll,ll,lm,ll,ll,lm,ll,ll,ll,lm,lm,lm,ll,lm	TGCAGGCCAATGAAATAGTTGGAACCCCCCACGGAATCGCATTCTTTATGCATTGAGCCGGTCACGTATCGAGCTGGTTAATAAGCCATCGTAAA	scaffold_3472	98.95	95	1	0	1	95		10147	10241	2e-44	180
scf372	II	146.666	<nnxnp>,(nn,np),np,nn,nn,nn,np,np,nn,np,nn,np,nn,nn,nn,np,nn,nn,np,nn,nn,nn,nn,nn,np,np,np,nn,nn,np,nn,nn	TGCAGGCAAAACTTATTATGAATTTTGGTTATGTCACTTCACATTTCGTTTCACTCTCTGAGTCCTGCACACACAATGCAACACGAATATCTGGT	scaffold_372	98.95	95	1	0	1	95		217950	217856	2e-44	180
scf434.1	II	146.666	<nnxnp>,(nn,np),np,nn,nn,nn,np,np,nn,np,nn,np,nn,nn,nn,np,nn,nn,np,nn,nn,nn,nn,nn,np,np,np,nn,nn,np,nn,nn	TGCAGGTGCGCCTCCTGCTGGCCATACCGGCTCTCCTACCGCTAGCCCTTCTTCTTTCGTGTGGCTAATGTAGATGCAGAGCAACGACTACAATT	scaffold_434	98.95	95	1	0	1	95		230818	230912	2e-44	180
scf434.2	II	146.666	<nnxnp>,(nn,np),np,nn,nn,nn,np,np,nn,np,nn,np,nn,nn,nn,np,nn,nn,np,nn,nn,nn,nn,nn,np,np,np,nn,nn,np,nn,nn	TGCAGGTCATTCCTGATGGCGACCACGCCACAACGGCCCCTAAACCACGCCCCGCATGATAGAAAGACAGCTTTGTAAATCCAAATTGTATTGTA	scaffold_434	98.95	95	1	0	1	95		205291	205385	2e-44	180
scf7269	II	146.666	<nnxnp>,(nn,np),np,nn,nn,nn,np,np,nn,np,nn,np,nn,nn,nn,np,nn,nn,np,nn,nn,nn,nn,nn,np,np,np,nn,nn,np,nn,nn	TGCAGGTTCTATTTATTTCCTGCATTCCATACATGGCACATTAGCATCTACGGATGAAATGCGCCTTACAAATGTAAATTATTACGATTAAATAT	scaffold_7269	98.95	95	1	0	1	95		9988	9894	2e-44	180
scf7269.1	II	146.666	<nnxnp>,(nn,np),np,nn,nn,nn,np,np,nn,np,nn,np,nn,nn,nn,NP,nn,nn,np,nn,nn,nn,nn,nn,np,np,np,--,nn,np,nn,nn	TGCAGGGTTAATAGCCAGAACTAGTGGGAGGTTAAGGCCAGTTTAAAGAGGTGAGTTTTCAGTACACACTTAAATATACTCTTTGGTTCTTTCGG	scaffold_7269	98.95	95	1	0	1	95		9985	10079	2e-44	180
scf2201	II	151.36	<nnxnp>,(nn,np),NP,np,np,np,nn,nn,np,nn,np,nn,np,np,np,nn,np,np,nn,np,NP,np,np,np,nn,nn,nn,np,np,nn,np,np	TGCAGGTGTGCGTCCGCCATGGTGGACTCCTGCCTTGCTTTTTTTTTTAACCCTTTCCTATGCCCCTTCCCACGAGTTTTTCTTCCGATTCCTTT	scaffold_2201	100	95	0	0	1	95		20637	20543	8e-29	129
scf2201.1	II	156.053	<nnxnp>,(nn,np),nn,np,np,np,nn,nn,np,nn,np,nn,np,np,np,nn,np,np,nn,np,np,np,np,np,nn,nn,nn,np,np,nn,np,np	TGCAGGATCTCGGGGTAGCTGTACGCCTTGTCCTTGCGGCAGCGCGTGCGAGCGTGCGTGGAGTCCTGCGGCAGCGTGGCACAGCGCTCCAGCAG	scaffold_2201	100	95	0	0	1	95		20634	20728	1e-46	188
scf868	II	156.053	<nnxnp>,(nn,np),nn,np,np,np,nn,nn,np,nn,np,nn,np,np,np,nn,np,np,nn,np,np,np,np,np,nn,nn,nn,np,np,nn,np,np	TGCAGGTGCACCAGGTGCCTCGTCAGCCTGCGTGCCCTGACCTCGGCGTCCGGATTCCAGAACTCCTCCGAGGCCCCCGTCTTGTGGTCCTGGAT	scaffold_868	100	95	0	0	1	95		58118	58212	1e-46	188
scf195	II	160.747	<nnxnp>,(nn,np),np,nn,nn,nn,np,nn,nn,np,nn,np,nn,nn,nn,np,nn,nn,np,nn,nn,nn,nn,nn,np,np,np,nn,nn,np,nn,nn	TGCAGGACGATCCAACCCAATAATGAAGTATTGTCAAACTAATTGTTGGTCGTCAAAGCCTTATTATAATCTTTATTTTTCAATTACGCCAAAAT	scaffold_195	100	95	0	0	1	95		299590	299496	1e-46	188
scf195.2	II	160.747	<nnxnp>,(nn,np),np,nn,nn,nn,np,nn,nn,np,nn,np,nn,nn,nn,np,nn,nn,np,nn,nn,nn,nn,nn,np,np,np,nn,nn,np,nn,nn	TGCAGGGCTTTGACCTGGCTACACGGACAACATCGTGTGTACATCGCTAGCACTGAGTGGAGCCTCAGGGGACTTTCCACTGCTGGCAATAGAGC	scaffold_195	98.95	95	1	0	1	95		245076	244982	2e-44	180
scf195.3	II	160.747	<nnxnp>,(nn,np),np,nn,nn,nn,np,nn,nn,np,nn,np,nn,nn,nn,np,nn,nn,np,nn,nn,nn,nn,nn,np,np,np,nn,nn,np,nn,nn	TGCAGGCATGTGTCTTGCGCACACAATCTGCACATGATCCACTGACTCCCCCTCCCACCCCCTGTTTGACAGATTGCTGGCATGCACCAACACCA	scaffold_195	100	95	0	0	1	95		107685	107779	1e-46	188
scf1983	II	160.747	<nnxnp>,(nn,np),np,nn,nn,nn,np,nn,nn,np,nn,np,nn,nn,nn,np,nn,nn,np,nn,nn,nn,nn,nn,np,NP,np,nn,nn,np,nn,nn	TGCAGGAACATTATCAATTATCACCCTGCCCACTGGACGGATGTGCTGTCACCTCCCTTAAGGATGTAAAAGATCTCGAGGAAATGTTAAAATAG	scaffold_1983	100	92	0	0	1	92		1044	1135	6e-45	182
scf195.1	II	170.482	<nnxnp>,(nn,np),np,nn,nn,nn,np,nn,nn,np,nn,np,nn,nn,nn,nn,nn,nn,np,nn,nn,NP,nn,nn,np,np,np,nn,nn,np,nn,nn	TGCAGGCTAATACTACTTTGAACGTATGGATAAAGTACAGTATTTTAAGATAGACACTTCGACAGTATCAGGTAAAAGCCAACAAAAGCGATTGA	scaffold_195	98.95	95	1	0	1	95		588372	588466	2e-44	180
scf6143	II	170.482	<nnxnp>,(nn,np),np,nn,nn,nn,np,nn,nn,np,nn,np,nn,nn,nn,nn,nn,nn,np,nn,nn,np,nn,nn,np,np,np,nn,nn,np,nn,nn	TGCAGGTACCTTATTGATGGTAGATAGGCATCTCACAACTCCATTGTTCCATCTCTCCACCACTCCTACCTCAGTCGTTGGAATACATGCATCCA	scaffold_6143	97.89	95	2	0	1	95		152661	152567	6e-42	172
scf6143.2	II	170.482	<nnxnp>,(nn,np),np,nn,nn,nn,np,nn,nn,np,nn,np,nn,nn,nn,nn,nn,nn,np,nn,nn,NP,nn,nn,np,np,np,nn,nn,np,nn,nn	TGCAGGACCTTGAAGAGAGGGAGCGCAGTCTTGCAGATGATTTGCGAGTTGATTGAGAGCCAGTCCGAGAGATCTGGGGAATCGTTGTGATTGGT	scaffold_6143	98.95	95	1	0	1	95		403868	403962	2e-44	180
scf6143.3	II	170.482	<nnxnp>,(nn,np),np,nn,nn,nn,np,nn,nn,np,nn,np,nn,nn,nn,nn,nn,nn,np,nn,nn,np,nn,nn,np,np,np,nn,nn,np,nn,nn	TGCAGGGTTCGGGGGAGGTGTGGCGAGGTGCATGGGGTGTTAGTGCACCTGTGGTGCCACGACCGCGGAGCAACTCCGCAAGCGCCGCGATGCCC	scaffold_6143	98.95	95	1	0	1	95		470214	470308	2e-44	180
scf6143.4	II	170.482	<nnxnp>,(nn,np),np,nn,nn,nn,np,nn,nn,np,nn,np,nn,nn,nn,nn,nn,nn,np,nn,nn,np,nn,nn,np,NP,np,nn,nn,np,nn,nn	TGCAGGGTTGATGATCACGTGGCGTTGATCCCCAATCAGGGTTTGAATCTACAACCTTCCGCTCGTGAGCTAAGCACACCAACCACGGCAACCAC	scaffold_6143	100	95	0	0	1	95		530793	530887	1e-46	188
scf6143.6	II	170.482	<nnxnp>,(nn,np),np,nn,nn,nn,np,nn,nn,np,nn,np,nn,nn,nn,nn,nn,nn,np,nn,nn,np,nn,nn,np,np,np,nn,nn,np,nn,nn	TGCAGGATTTTACAACATTCAAATTAAATTTGTTTAATGCATTCCACTGATGTGTGGTACCAATGATAGAGCTGCCTGGCCAAGCAGCTTGGCAG	scaffold_6143	98.95	95	1	0	1	95		284264	284170	2e-44	180
scf6143.7	II	170.482	<nnxnp>,(nn,np),NP,nn,nn,nn,np,nn,nn,np,nn,np,nn,nn,nn,nn,nn,nn,np,nn,nn,NP,nn,nn,np,np,np,nn,nn,np,nn,nn	TGCAGGAGGTTAAACACTCGCAGCAAGTCTTATGAACAGTATTGGGAAGCATGACAGCATTGGTTCAACTGTACTGAGAAGGAATCTTTATTATA	scaffold_6143	100	95	0	0	1	95		628136	628230	1e-46	188
scf6143.8	II	170.482	<nnxnp>,(nn,np),--,nn,nn,nn,np,nn,nn,np,nn,np,nn,nn,nn,nn,nn,nn,np,nn,nn,np,nn,nn,np,np,np,nn,nn,np,nn,nn	TGCAGGATCGTACGGGATGTTGTGAAGTCCATAACCGTATTCTCCGGATTATAAGACGCTCTGGAATAAAGTTATCTCAATCTGGTTGGCTATGT	scaffold_6143	98.95	95	1	0	1	95		284261	284355	2e-44	180
scf6143.9	II	170.482	<nnxnp>,(nn,np),np,nn,nn,nn,np,nn,nn,np,nn,np,nn,nn,nn,nn,nn,nn,np,nn,nn,np,nn,nn,np,np,np,nn,nn,np,nn,nn	TGCAGGCCTTGCAATGAAGACCGCTGCGTGAAACCAAGACCTGCCGGCACATTTAGAGCCACCCTCAAGGCCTTCTTCCCATGGGCTTCTCGTTG	scaffold_6143	100	95	0	0	1	95		676262	676168	1e-46	188
scf6143.1	II	175.175	<nnxnp>,(nn,np),np,nn,nn,nn,np,nn,nn,np,nn,np,NP,nn,nn,nn,nn,nn,np,nn,nn,np,nn,nn,np,np,np,nn,nn,np,nn,nn	TGCAGGGACCTGTTAGTCGTCCATGGGCACATTGGCCCTGGAGGGCTTCATCATCCAGCATAGCGGAGCGGAGTGTTGGGAGATCAACCCCTTTT	scaffold_6143	100	95	0	0	1	95		249457	249363	1e-46	188
scf6143.5	II	184.91	<nnxnp>,(nn,np),np,nn,nn,nn,np,nn,nn,np,nn,np,nn,np,nn,nn,nn,nn,np,nn,nn,np,nn,nn,np,np,np,nn,nn,np,nn,nn	TGCAGGAAAACGACGGAAAGTGTGCAGCGTTCATCACAGATAAAGTTGTGCGCTTTTATAAGAGTATTATTGTAATAAATAAATAAAAAGTTCAT	scaffold_6143	97.89	95	0	1	1	95		64393	64301	4e-40	167
scf3541.2	II	189.603	<nnxnp>,(nn,np),np,nn,nn,nn,np,nn,nn,np,nn,np,nn,NP,nn,nn,nn,np,np,nn,nn,np,nn,nn,np,np,np,nn,nn,np,nn,nn	TGCAGGCGTCCCACGGACGCTGAGGGCGGCTGGTATTCTCTCTCCCACTCCAGAAGAACTCTGATCCAATTTGCCCTCCTGCCCCCCTTATGTTC	scaffold_3541	100	94	0	0	1	94		301534	301441	4e-46	186
scf1685	II	194.297	<nnxnp>,(nn,np),np,nn,nn,nn,np,nn,nn,np,nn,np,nn,np,nn,nn,nn,np,np,np,nn,np,nn,nn,np,np,NP,nn,nn,np,nn,nn	TGCAGGAGCACACCAACAGCGTCAGTCCCACCACCCCAACGATCAGCCCAACAAACACCTTGGAGGGCAGAGCAACCGCTCGGGCTCTGTGCGCG	scaffold_1685	100	95	0	0	1	95		51319	51413	1e-46	188
scf2977.4	II	194.297	<nnxnp>,(nn,np),nn,np,np,np,nn,np,np,nn,np,nn,np,nn,np,np,np,nn,nn,nn,np,nn,np,np,nn,nn,nn,np,np,nn,np,np	TGCAGGTACTAGCCAGTTAGGATAACTCGCAAAATGAACAATTTAACCTCATGGCCGTACCCCAGGGTCCCATAGTACCCCGTCTCTCGCATAAT	scaffold_2977	100	95	0	0	1	95		395462	395556	1e-46	188
scf3541.3	II	194.297	<nnxnp>,(nn,np),np,nn,nn,nn,np,nn,nn,np,nn,np,nn,np,nn,nn,nn,np,np,np,nn,np,nn,nn,np,np,np,nn,nn,np,nn,nn	TGCAGGGACCTGTTTACTTTATTGTTCGAATAAAACTCCACGGACGTGGATCCAGCGAGACATCTTCTCCCGGAGCTGCTCCTGCTTTGTCTCCC	scaffold_3541	100	95	0	0	1	95		60916	60822	1e-46	188
scf6780	II	194.297	<nnxnp>,(nn,np),np,nn,nn,nn,np,nn,nn,np,nn,np,nn,np,nn,nn,nn,np,np,np,nn,np,nn,nn,np,np,np,nn,nn,np,nn,nn	TGCAGGATCCCAGCGCCTGACACCCGTAGACCCACCGATGGCACCTTCTACAGGCGGATCGAGGGCGACGAAACGGCCGTCATTCTTTTTCTTCT	scaffold_6780	100	95	0	0	1	95		8482	8388	1e-46	188
scf6780.1	II	194.297	<nnxnp>,(nn,np),np,nn,nn,--,np,nn,nn,np,nn,np,nn,np,nn,nn,nn,np,np,np,--,np,nn,nn,np,np,np,nn,nn,np,nn,--	TGCAGGCGAAACAATGGAATCCTGCTGAGGCGTACCCTCCGTGACTGCTCGCCCTGGCTCGCTGGACACATCAGATACCCGGTACTCAGGTGGTG	scaffold_6780	100	95	0	0	1	95		8479	8573	1e-46	188
scf274	II	196.556	<nnxnp>,(nn,np),nn,np,NP,np,nn,np,np,nn,np,nn,np,nn,--,np,np,nn,nn,nn,np,nn,np,np,nn,nn,nn,np,np,nn,np,np	TGCAGGAACACCACATACCAGACGTAACATTTCAACAACAGGGAATAGGATAGTCTGTACGTATGGAAGTGTTTTTTACATTTTAAAGTACTGCA	scaffold_274	98.95	95	1	0	1	95		29631	29537	2e-44	180
scf14917	II	198.909	<hkxhk>,(hh,hk,kk),hk,hk,hk,hh,hk,hk,hk,kk,hk,hk,hh,kk,hk,hh,hk,kk,kk,kk,hh,kk,hh,hh,kk,hk,hk,hk,hh,hk,hh,hh	TGCAGGGATGCCCATCAAACCCACCGTTTAACCGGGCGATGGTGGCTTCGTAATCCAGCACTCTTGAGGCTCGGGATGGTTGAATCGCGCAAATA	scaffold_14917	96.7	91	2	1	6	95		6041	5951	8e-35	149
scf295	II	200.634	<lmxll>,(ll,lm),lm,ll,ll,lm,lm,ll,ll,ll,ll,LM,lm,ll,lm,lm,ll,lm,ll,ll,lm,ll,lm,lm,ll,lm,lm,ll,lm,--,lm,lm	TGCAGGCCCTCATCTCATAGGTCCTGCAGAGGGTTTGGGGTACTTATATGCAAGAGTAAATTCTAAGCTACTCTCATTAAGAGACTAATAGACAA	scaffold_295	100	95	0	0	1	95		163497	163403	1e-46	188
scf4184	II	200.634	<efxeg>,(ee,ef,eg,fg),ee,fg,fg,eg,ee,fg,fg,ef,fg,ee,eg,ef,ee,eg,fg,ee,ef,ef,eg,ef,eg,eg,ef,ee,ee,fg,eg,ee,eg,eg	TGCAGGGACCTGTTTAATATGGAGCCGAGGAAGACCCAGCCATCGAATTCACCATGGGAACCCCCGGCCCGACGTCCTTGTAAGGGCCGGGTCCG	scaffold_4184	98.95	95	1	0	1	95		17801	17707	2e-44	180
scf24780	II	201.528	<nnxnp>,(nn,np),nn,np,np,np,nn,np,np,nn,np,nn,np,nn,nn,np,np,nn,nn,nn,np,nn,np,np,nn,nn,nn,np,np,nn,np,np	TGCAGGAAAACATATTTCACAGAGGACTGCAGAGCTTGGGCAATTACTGGTGGCGCCGGCTCAAAAAGAAGTTCTGCTGCCTTCCTTTTTGTACG	scaffold_24780	97.89	95	2	0	1	95		18057	17963	6e-42	172
scf1091	II	202.422	<efxeg>,(ee,ef,eg,fg),ee,fg,fg,eg,ee,fg,fg,ef,fg,ee,eg,ef,ee,--,fg,ee,ef,ef,eg,ef,eg,eg,ee,ee,ee,fg,eg,ee,eg,eg	TGCAGGAAAGTGAATGTCAGGGGCAATTGGTCACGACATGTTACATTGTTAATAAATAATTATATTAATCGGAATATTCATAATATGATTAATAT	scaffold_1091	98.91	92	1	0	1	92		242369	242278	1e-42	174
scf1091.2	II	202.422	<nnxnp>,(nn,np),nn,NP,np,np,nn,np,np,nn,np,nn,np,nn,nn,np,NP,nn,nn,nn,np,nn,np,np,nn,nn,nn,np,NP,nn,np,np	TGCAGGATATCTAAACTCCATATACCCTTGTAAAAGTTTGTTATTACGATTAATCAAATCTGTAACCGGTGACAAAACCCCGTGAGAGAAACCCA	scaffold_1091	100	95	0	0	1	95		242366	242460	1e-46	188
scf1297.2	II	202.422	<nnxnp>,(nn,np),nn,np,np,np,nn,np,np,nn,np,nn,np,nn,nn,np,np,nn,nn,nn,NP,nn,np,np,nn,nn,nn,np,np,nn,np,np	TGCAGGTGCTTCGCAAGGCCACCATGAGGGCCTCCAGCTGCTCGGAGAAGCTGGGAGCCGTGAACCAGGTGAGCGCCACCTCCAGAGCCGTTCGC	scaffold_1297	98.95	95	1	0	1	95		973701	973795	2e-44	180
scf2872	II	205.871	<nnxnp>,(nn,np),nn,np,np,np,nn,np,np,nn,np,nn,np,nn,nn,np,np,nn,nn,nn,np,nn,np,np,nn,nn,nn,np,nn,nn,np,np	TGCAGGTTCTGTTTATTTCCTGCTTTCCAAACAAGCTGGCGCTTTGGGATCCACGAATGAAATGCGACTTACAAATGTGAATTATCAATACTGGC	scaffold_2872	100	95	0	0	1	95		22894	22800	1e-46	188
scf6196	XXXIII	0	<hkxhk>,(hh,hk,kk),hk,hk,hk,kk,kk,kk,hh,hk,hk,hk,hk,hk,kk,hk,hh,hh,hk,kk,hk,kk,hh,kk,kk,hk,hk,kk,hk,hk,hk,hk	TGCAGGATGAAGGCCTCCCCCACGCTGTCAGTCGTGGGGACTTGAATGGCCCCACTTAAGTCAGGATTGGTGGGCACTTTTCCAAAGTCAGGGCC	scaffold_6196	100	95	0	0	1	95		12303	12397	1e-46	188
scf87	XXXIII	10.087	<efxeg>,(ee,ef,eg,fg),fg,ee,fg,ef,ef,ee,eg,ee,eg,fg,fg,ee,ef,fg,eg,fg,eg,ef,fg,ef,eg,ef,ef,fg,fg,ef,fg,ef,fg,fg	TGCAGGGTCACATACAGACACCCACAAACACGTGTTTACAGTCCCACCAAATTCTATTCTCTGTATTATAAGACACTCCGCTAGATAAGCTGCAC	scaffold_87	98.95	95	1	0	1	95		403055	403149	2e-44	180
scf14665	XXXIII	11.812	<efxeg>,(ee,ef,eg,fg),fg,eg,fg,ef,ef,ee,eg,ee,eg,fg,fg,ee,ef,fg,eg,fg,eg,ef,fg,ef,eg,ef,ef,fg,fg,ef,fg,ef,fg,fg	TGCAGGTTTGTTCCCTACGTTAGCCGATATGTAACATTGGCGTAGCATCACTTCCTTTTAATGCGTGCATACAAAATAACAACAGCCCATATGAT	scaffold_14665	98.95	95	1	0	1	95		3573	3479	2e-44	180
scf76	XXXIII	11.812	<hkxhk>,(hh,hk,kk),hk,kk,hk,hh,hh,hk,kk,hk,--,hk,hk,hk,hh,hk,kk,hk,kk,hh,hk,hh,kk,hh,hh,hk,hk,hh,hk,--,hk,hk	TGCAGGGCGGAGCGCTTGATGGTGTCAAGCTGGAGTTGAGCGCTGGTGCTCACAGCGGGGCTCACGTCCTCCACGGCTGCCAGGTAGCAGCAAAA	scaffold_76	98.95	95	1	0	1	95		306110	306016	2e-44	180
scf76.1	XXXIII	13.537	<hkxhk>,(hh,hk,kk),hk,kk,hk,hh,hh,hk,kk,hk,kk,hk,hk,hk,hh,hk,kk,hk,kk,hh,hk,hh,kk,hh,HK,HK,hk,hh,hk,hh,hk,hk	TGCAGGTCACAACACCTACTCAAAATAATTTTTATGAACCCCATAGAGATTGGTAGGCTGCAAATCAACTCTGACACCACAGACAAAAATAACTC	scaffold_76	98.95	95	1	0	1	95		59630	59536	2e-44	180
6911	XXXIII	15.261	<efxeg>,(ee,ef,eg,fg),fg,eg,fg,ef,ef,ee,eg,ee,eg,fg,fg,ee,ef,fg,eg,fg,eg,ef,fg,ef,eg,ef,ef,fg,fg,ef,fg,ef,fg,fg	TGCAGGGTCGGACTCGGGCCGTGCGGTGTCACGAGCCGAGACCTCCAGTGGCAGCACCACGACTTTAGACAACTCACACCCCACATCGCGTCACC
scf142.1	XXXIII	15.261	<hkxhk>,(hh,hk,kk),kk,hk,kk,hk,hk,hh,hk,hh,hk,kk,kk,hh,hk,kk,hk,kk,hk,hk,kk,hk,hk,hk,hk,kk,kk,hk,kk,hk,kk,kk	TGCAGGTAGCGGGCGGCGTGACCTGAGACTCGGCCTGGCAATTCGCAACGGGGCACAGATCATCGCGCCGTGCCGCGAGCACAACTAAAGGCGTA	scaffold_142	98.92	93	1	0	1	93		1198840	1198932	4e-43	176
scf142.6	XXXIII	15.261	<nnxnp>,(nn,np),np,np,np,nn,nn,nn,np,nn,np,np,np,nn,nn,np,np,np,np,nn,np,nn,np,nn,nn,np,np,nn,np,nn,np,np	TGCAGGTGCAAAATTAATACAACACAATATGGATTTACAGTATGTCTCGATGCAACCGCATCTCGCGAAGCTGCACAAAACAATGGGACACGGCC	scaffold_142	98.95	95	1	0	1	95		826679	826773	2e-44	180
scf42.1	XXXIII	15.261	<lmxll>,(ll,lm),ll,lm,ll,ll,ll,lm,lm,lm,lm,ll,ll,lm,ll,ll,lm,ll,lm,ll,ll,ll,lm,ll,ll,--,ll,ll,ll,ll,ll,ll	TGCAGGGAACACGCAAGATGGAAAAGGCATTAAAAATCACTTTACCTCTGAAGTTTACTGGGGCCAGAAGTGACTGCCATTGCGGAGGCGTCTTC	scaffold_42	98.95	95	1	0	1	95		418976	419070	2e-44	180
scf5597	XXXIII	15.261	<lmxll>,(ll,lm),lm,ll,lm,lm,lm,ll,ll,ll,ll,lm,lm,ll,lm,lm,ll,lm,ll,lm,lm,lm,ll,lm,lm,lm,LM,lm,lm,lm,lm,lm	TGCAGGCGTCTCTGGTCGAATCGGCCGAAGTCCACCCGACCACCGAAACTCCGGTGACGCCCTCGCGGGCGCTGCGACGCGGCAGACGCTCAAAT	scaffold_5597	98.95	95	1	0	1	95		7867	7961	2e-44	180
scf5597.1	XXXIII	15.261	<lmxll>,(ll,lm),LM,ll,lm,lm,lm,ll,--,ll,ll,lm,lm,ll,lm,lm,ll,lm,--,lm,lm,lm,ll,lm,lm,lm,lm,lm,lm,lm,lm,lm	TGCAGGAGCCTCCGACTGCGACGCTTTCTGGGTACGTCGCTTGCAGCCAAATCGGGTACGGAATCTGTTTCGGAGGTTGTTGTCAACGTCAAAGC	scaffold_5597	100	95	0	0	1	95		7870	7776	1e-46	188
scf87.1	XXXIII	15.261	<hkxhk>,(hh,hk,kk),hh,hk,hh,hk,hk,kk,hk,kk,hk,hh,hh,kk,hk,hh,hk,hh,hk,hk,hh,hk,hk,hk,hk,hh,hh,hk,hh,hk,hh,hh	TGCAGGGCGATGCCGAGCGGGAGAGACTGTCAGTGGCTATGCCTCGCCACTGTTCAACGACGAAGTCACAGTTTATTACCACCGCCTGTCTCTGC	scaffold_87	98.95	95	1	0	1	95		632626	632720	2e-44	180
scf87.10	XXXIII	15.261	<nnxnp>,(nn,np),np,np,np,nn,nn,nn,np,nn,np,np,np,nn,nn,np,np,np,np,nn,np,nn,np,nn,nn,np,np,nn,np,nn,np,np	TGCAGGTACGGTAGTGAGATGTTGCCTCTGTTTGCTTATGTTGTACGGTAATTGTTGCGCGTGTGTTTTAATGCGGGCTGCATGTATGCGTGTGG	scaffold_87	98.95	95	1	0	1	95		527256	527162	2e-44	180
scf87.3	XXXIII	15.261	<hkxhk>,(hh,hk,kk),kk,hk,kk,hk,hk,hh,hk,hh,hk,kk,kk,hh,hk,kk,hk,kk,hk,hk,kk,hk,hk,hk,hk,kk,kk,hk,kk,hk,kk,kk	TGCAGGGTAGAGAAACGTGTCCTGCCACATCCCTTCATGCCCATCATGGAGTTCTGTCTCCGGTCAATAATTGCTGTGAATAACATTAACATGGG	scaffold_87	98.95	95	1	0	1	95		632629	632535	2e-44	180
scf87.6	XXXIII	15.261	<lmxll>,(ll,lm),lm,ll,lm,lm,lm,ll,ll,ll,ll,lm,lm,ll,lm,lm,ll,lm,ll,lm,lm,lm,ll,lm,lm,lm,lm,lm,lm,lm,lm,lm	TGCAGGCTTGCCACTTTTTGACGGCTCATGCAACGCACTGGACCACCAGCGCATGCAGGCACTGCACGGCTGCCAACTGGTGCTATTACGCCTGT	scaffold_87	98.95	95	1	0	1	95		402725	402631	2e-44	180
scf87.7	XXXIII	15.261	<lmxll>,(ll,lm),lm,ll,lm,lm,lm,ll,ll,ll,ll,lm,lm,ll,lm,LM,ll,lm,ll,lm,lm,lm,ll,lm,lm,lm,lm,lm,lm,lm,LM,lm	TGCAGGCACGAAAGTTAAGTCAAAATTTGGATGAAGACCTATCCACAAATCGAGTTGTTTGACCATACTTCACCACAATGGTCTATGCGGGTTGG	scaffold_87	100	95	0	0	1	95		417437	417343	1e-46	188
scf87.8	XXXIII	15.261	<lmxll>,(ll,lm),lm,ll,lm,lm,lm,ll,ll,ll,ll,lm,lm,ll,lm,lm,--,lm,ll,lm,lm,lm,ll,lm,lm,lm,lm,lm,lm,lm,lm,lm	TGCAGGTGAGCCCGGAGCGCAGTCGTTCATCGGCCACCTCCATCCAGTTGGCTGAACGGCGTCGTTATTGGGTGACGAACTGTGCGAGTCAATTC	scaffold_87	98.95	95	1	0	1	95		533417	533323	2e-44	180
scf7011.3	XXXIII	20.628	<lmxll>,(ll,lm),LM,lm,ll,ll,ll,lm,lm,lm,lm,ll,ll,lm,ll,ll,lm,ll,lm,ll,ll,ll,lm,ll,ll,ll,ll,ll,ll,ll,ll,lm	TGCAGGTTGCAGGGTGGGTGTCCCGTTCACCGCTTAATCTTGCAACGTGCAAGCGGATCAGTGATAATTATATTTACAGAGGCGTTGCGCCGTTA	scaffold_7011	98.95	95	1	0	1	95		8124	8218	2e-44	180
scf7011	XXXIII	25.994	<hkxhk>,(hh,hk,kk),hk,hk,hh,kk,hk,kk,hk,kk,hk,hh,hh,kk,hk,hh,hk,hh,hk,hk,hh,hk,hk,hk,hk,hk,hh,HK,hh,hk,hh,hk	TGCAGGAGAATGCGTGAGCACGCGGGGCATCAGGGCCTGCGCTGTGCAGCGGAAACAGCAGCGGTGGCGGCGGTCGTGGGCCGTGGGGAACGTGA	scaffold_7011	100	95	0	0	1	95		9659	9565	1e-46	188
scf4996	XXXIII	26.856	<nnxnp>,(nn,np),nn,np,np,--,nn,nn,np,--,np,np,np,nn,nn,--,np,np,np,nn,np,nn,np,nn,nn,nn,np,nn,np,nn,np,np	TGCAGGTGGCTCGTCGCCCCGGGGAAAATAATAAACCACCTCTAACCGTTCCGTGACCCCCAGCTCCAACCTGCGCGACGCGTTGTTCTTGCCCC	scaffold_4996	100	95	0	0	1	95		19768	19674	1e-46	188
scf4996.1	XXXIII	26.856	<nnxnp>,(nn,np),nn,np,np,nn,nn,nn,np,nn,np,np,np,nn,nn,np,np,np,np,nn,np,nn,np,nn,nn,nn,np,nn,np,nn,np,np	TGCAGGAGAGCAGTCGAGAGAGCAGGTTGCTGAATTGTCAATTTCGGCACTAACCCCCTCACGTGCATGTGGATTGTCTCCAGCCGCACCAGAGT	scaffold_4996	100	95	0	0	1	95		19765	19859	1e-46	188
scf17070	XXXIII	27.719	<hkxhk>,(hh,hk,kk),hh,kk,hk,hh,hh,hk,kk,hk,kk,hk,hk,hk,hh,hk,kk,hk,kk,hh,hk,hh,kk,hh,hh,hh,hk,hh,hk,hh,hk,kk	TGCAGGCAAAGATGAAATGAACCCAATGGGACGCGTGGAAAACAACGTCGCCTCGTGGTGTGGAAGGGCCACTCTTGCGGTTGCATTTAGACAAT	scaffold_17070	97.89	95	2	0	1	95		4129	4035	6e-42	172
scf1754	XXXIII	27.719	<lmxll>,(ll,lm),lm,ll,lm,lm,lm,ll,ll,ll,ll,lm,lm,ll,lm,lm,ll,lm,ll,lm,lm,lm,ll,lm,lm,lm,lm,lm,lm,lm,lm,ll	TGCAGGTTCTGTTTATTCGCTGCTTTCCATACACGGTGGCGCATTTGGATCTACGGATGCAATGTGCCTTGCAAATGTTAATTATTATTACGTCA	scaffold_1754	98.95	95	1	0	1	95		33014	33108	2e-44	180
scf2440	XXXIII	27.719	<hkxhk>,(hh,hk,kk),hk,hk,kk,hk,hk,hh,hk,hh,hk,kk,kk,hh,hk,kk,hk,kk,hk,hk,kk,hk,hk,hk,hk,hk,kk,hk,kk,hk,kk,hk	TGCAGGGTCTTGTTTTGTTAGTAAAAAGTGGTATACCCCACGGGTTATATACGGGAAAATACGGTAATTGTGATCCAGAGGTTTCACGAGTTCGA	scaffold_2440	98.95	95	1	0	1	95		88743	88649	2e-44	180
scf3823	XXXIII	27.719	<lmxll>,(ll,lm),lm,ll,--,lm,lm,ll,ll,ll,ll,--,--,ll,lm,--,ll,--,ll,lm,lm,lm,ll,lm,lm,lm,--,lm,--,LM,--,ll	TGCAGGGTTGTAGATTTCTTTGCTCCAAATCTTCACTTGAAATCTACTCGGATACATTATATCCCACAGCTATCACAAATTTTTCATGATCACTG	scaffold_3823	96.88	96	2	1	1	95		9183	9088	9e-38	159
scf6132	XXXIII	27.719	<lmxll>,(ll,lm),lm,ll,lm,lm,lm,ll,ll,ll,ll,lm,lm,ll,lm,lm,ll,lm,ll,lm,lm,lm,ll,lm,lm,lm,--,lm,lm,lm,lm,ll	TGCAGGGTAAACGACCAGCACTAGGTTTCAAGGCCAGTTTCAAGAGGTGAGTTTTCAAGATGGACTTAAATATCTCTAACGATGCTCAATGTCTT	scaffold_6132	100	95	0	0	1	95		6922	6828	1e-46	188
scf6132.1	XXXIII	27.719	<lmxll>,(ll,lm),lm,ll,lm,lm,lm,ll,ll,ll,ll,lm,lm,ll,LM,lm,ll,lm,ll,lm,lm,lm,--,lm,lm,lm,lm,lm,lm,lm,lm,ll	TGCAGGTTCTGTTTATTTCCTGCTTTTCATACATGGTGGCGCATTGGGAATCCACGGATGTAATGGGCCTTGAAGATGTAAATGATTATTATGAA	scaffold_6132	100	95	0	0	1	95		6919	7013	1e-46	188
scf6132.2	XXXIII	27.719	<nnxnp>,(nn,np),nn,np,np,nn,nn,nn,np,nn,np,np,np,nn,nn,np,np,np,np,nn,np,nn,np,nn,nn,nn,np,nn,np,nn,np,np	TGCAGGCGCACAGACGGATGTGCACTCAGACAGATGCACACAGAGATATGCGCATACACGCAAAGACAAAGCTTTCCCGTTATAGCCTTTAACAG	scaffold_6132	98.95	95	1	0	1	95		146355	146449	2e-44	180
scf7011.1	XXXIII	27.719	<hkxhk>,(hh,hk,kk),hk,hk,kk,hk,hk,hh,hk,hh,hk,kk,kk,hh,hk,kk,hk,kk,hk,hk,kk,HK,hk,hk,hk,hk,kk,hk,kk,hk,kk,hk	TGCAGGACATGCTCCTTGCCCTCATTACCTGCCGCTGCCACCGCTGCCGCTGCAGTGGGAATCACCCTCCCAGGCGTCTTCTCGGATCGCGTAAT	scaffold_7011	97.89	95	2	0	1	95		9656	9750	6e-42	172
scf7011.2	XXXIII	27.995	<hkxhk>,(hh,hk,kk),hk,hk,kk,hk,hk,hh,hk,hh,hk,kk,kk,hh,hk,--,hk,kk,hk,HK,--,hk,hk,hk,hk,hk,kk,hk,kk,hk,kk,hk	TGCAGGTGTCTCAGAATGGGGAAAGGGTTTAAGTGGCACAGCAAAAACGCTCACGTCCACATGTCCCACCGCACCTCAAGATGCTGCGGAGAAAC	scaffold_7011	100	95	0	0	1	95		8127	8033	1e-46	188
scf17632	XXXIII	29.348	<nnxnp>,(nn,np),nn,np,--,nn,nn,nn,np,nn,NP,--,--,nn,nn,--,np,--,np,nn,--,nn,np,nn,nn,nn,--,nn,--,nn,--,np	TGCAGGTTATGTTTATTCGCTGCTTTCCATACACGGTGGCGCATTGGGATATACGGATGAAACGTGCCTTACAAATGTAAATGTGTATTATCATA	scaffold_17632	97.89	95	2	0	1	95		421	515	6e-42	172
scf62.1	XXXIII	29.423	<hkxhk>,(hh,hk,kk),hk,hk,kk,hk,hk,hh,hk,hh,hk,kk,kk,hh,hk,kk,hk,kk,hk,hk,hk,hk,hk,hk,hk,hk,kk,hk,kk,hk,kk,hk	TGCAGGACACTATATATATTCCACAATGTGATCGTAGCATGTATTACAATACCATTTGGCTTTATATTGAAATAAAAACAACCAAACAGTGGGTT	scaffold_62	98.95	95	1	0	1	95		678628	678722	2e-44	180
scf5984	XXXIII	34.725	<efxeg>,(ee,ef,eg,fg),fg,ee,ef,fg,fg,eg,ee,eg,ee,ef,ef,ee,fg,ef,ee,ef,ee,fg,FG,fg,ef,fg,eg,--,ef,fg,ef,fg,ef,ee	TGCAGGCACCGGGTTGGGCATGGGCATCCCCTCTGGTGAACCCACGTTGGGTCGGCTTTTGTTCCAGATCCGGCTTTGGTTCCGGATCCGGCTTT	scaffold_5984	100	95	0	0	1	95		4400	4306	1e-46	188
scf5984.1	XXXIII	34.725	<hkxhk>,(hh,hk,kk),hk,hk,kk,hk,hk,hh,hk,hh,hk,kk,kk,hk,hk,kk,hk,kk,hk,hk,hk,hk,kk,hk,hh,hk,kk,hk,kk,hk,kk,hk	TGCAGGTAATCGTGCACCGATGATGTGGCCCCGTGCCTCATCCAGGGGGCCTGGTTGGGTGCGATGGATCTCGACCCCTGGAGGAACATTCGGAA	scaffold_5984	98.95	95	1	0	1	95		4397	4491	2e-44	180
scf1.15	XXXIII	35.588	<nnxnp>,(nn,np),nn,np,np,nn,nn,nn,np,nn,np,np,np,np,nn,np,np,np,np,nn,nn,nn,np,nn,nn,nn,np,nn,np,nn,NP,np	TGCAGGAAATTGAGCTACAGTTGGAGAGACTACAGAAGGCAGAAGCAGAGTCGGTACTGTACACGTGCACTTTGGATGGGAATGCTGAATATATT	scaffold_1	98.95	95	1	0	1	95		558678	558772	2e-44	180
scf1.17	XXXIII	35.588	<nnxnp>,(nn,np),nn,np,np,nn,nn,nn,np,nn,np,np,np,np,nn,np,np,np,np,nn,nn,nn,np,nn,nn,nn,np,nn,np,nn,np,np	TGCAGGTGTTACAGCGCTTTTATAAATCCAGGTCACGAGGGTAATTTTAACATTAACTTTAATAGGCGGGTAAATTTGGATGAGTGCAGGGGAAT	scaffold_1	100	95	0	0	1	95		510618	510712	1e-46	188
scf1.11	XXXIII	36.45	<lmxll>,(ll,lm),ll,lm,ll,ll,ll,lm,lm,lm,lm,lm,ll,lm,ll,ll,lm,ll,lm,ll,ll,ll,ll,ll,lm,ll,ll,ll,ll,ll,ll,lm	TGCAGGAAGCTGCCAGCACGTGGAGCGAAACGTCGGACATCAACGGCGAAATACACACGGTACAACACGAACTCACATTGGAGAGCTCTCAGGAA	scaffold_1	97.89	95	2	0	1	95		1346953	1346859	6e-42	172
scf1.12	XXXIII	36.45	<lmxll>,(ll,lm),lm,ll,lm,lm,lm,ll,ll,ll,ll,ll,lm,ll,lm,lm,ll,lm,ll,lm,lm,lm,lm,lm,ll,lm,lm,lm,lm,lm,lm,ll	TGCAGGCGTCCCACGGACGCTGAGGGCAGCTGGAGTCCTCTCTCGACTCCAGAAGAACTCTGACCCCAAATCTCCCTCCTGCCCCCATTATGTTC	scaffold_1	98.95	95	1	0	1	95		669906	669812	2e-44	180
scf1.13	XXXIII	36.45	<lmxll>,(ll,lm),lm,ll,--,LM,lm,ll,ll,ll,ll,ll,--,ll,LM,--,ll,--,ll,lm,lm,lm,--,lm,ll,lm,--,lm,--,lm,--,ll	TGCAGGCTGCTTTAGCGGCAGCCTTTCGAACTTATCAAACGTATTAACCACATCAGCAGCTCCGACCCGATTAAAAAACTCCACGTTCAAATACA	scaffold_1	98.95	95	1	0	1	95		368583	368489	2e-44	180
scf1.18	XXXIII	36.45	<nnxnp>,(nn,np),nn,np,np,nn,nn,nn,np,nn,np,np,np,np,nn,np,np,np,np,nn,nn,nn,np,nn,nn,nn,np,nn,np,nn,np,np	TGCAGGATGGCGACCTCGTTGCGCAGCTGGCTCTCCTGCTTGGTTGGAAAGCGCAGTTTGTCGATCACCTTGATGGCCACATCGCTGCCCGTCTT	scaffold_1	100	95	0	0	1	95		1658170	1658076	1e-46	188
scf1.4	XXXIII	36.45	<hkxhk>,(hh,hk,kk),hk,hk,hh,hk,hk,kk,hk,kk,hk,hk,hh,hk,hk,hh,hk,hh,hk,hk,hk,hk,hh,hk,kk,hk,hh,hk,hh,hk,hh,hk	TGCAGGTACCGGCCGGCACGCACGCTGCCGGCGTGGGTTTGCCGCGAGCACAGACGACCACATCGCACCGACCGTTCGTGACGACCTGCGCAACG	scaffold_1	97.92	96	1	1	1	95		1658167	1658262	4e-40	167
scf1.5	XXXIII	36.45	<hkxhk>,(hh,hk,kk),hk,hk,kk,hk,hk,hh,hk,hh,hk,hk,--,hk,hk,kk,hk,kk,hk,hk,hk,hk,kk,hk,hh,hk,kk,hk,kk,hk,kk,hk	TGCAGGGCTGTTCTAGAGCAGGGTACTTCGCTCATTTTCAGAGGGTCGGCACAGCGCCTGCAGAGAGGCGTTTTCACATTTTGTGTCATGTCGGG	scaffold_1	98.95	95	1	0	1	95		741042	740948	2e-44	180
scf1.7	XXXIII	36.45	<hkxhk>,(hh,hk,kk),hk,hk,hh,hk,hk,kk,hk,kk,hk,hk,hh,hk,hk,hh,hk,hh,hk,hk,hk,hk,hh,hk,kk,hk,hh,hk,hh,hk,hh,hk	TGCAGGCAAAGGTCGTGCTGCCAAATTTATTGTCAGCTTTTAAATGAGGTTCCGCAATCAAGACCACAATAAAAATCTGTATGCACACCCTTTTT	scaffold_1	98.95	95	1	0	1	95		596877	596971	2e-44	180
scf1.8	XXXIII	36.45	<hkxhk>,(hh,hk,kk),hk,hk,kk,HK,hk,hh,hk,hh,hk,hk,kk,hk,hk,kk,hk,kk,hk,hk,hk,hk,kk,hk,hh,HK,kk,hk,kk,hk,kk,hk	TGCAGGGAGAGGAAATTAATTTGAGATTTATGCCAGTTAATAAAGAAATGAAGGTTTACGGCACTGTGAGAATTGCACGTGAATGCCTCCACAGA	scaffold_1	100	95	0	0	1	95		442917	442823	1e-46	188
scf1167	XXXIII	36.45	<nnxnp>,(nn,np),nn,np,np,nn,nn,nn,np,nn,np,np,np,np,--,np,np,np,np,nn,nn,nn,np,nn,nn,nn,np,nn,np,nn,np,np	TGCAGGCCATCGGACAATCGGTTGGGACGGCTCCTTTCGTCAGCACGGTAGGGAGCCCGTCGCCTGGCACCAACTTGGCGTTCCATGCGGCGACG	scaffold_1167	98.95	95	1	0	1	95		49746	49652	2e-44	180
scf1.2	XXXIII	41.758	<hkxhk>,(hh,hk,kk),hk,hk,kk,hk,hk,hh,hk,--,hk,hk,kk,hk,hk,kk,hk,kk,hk,hk,hk,hh,kk,hk,hk,hk,kk,hk,hk,hk,kk,hk	TGCAGGGGACATGTGCAAACAGATGCTGATGTCCGGTGTGAGAGTAAAGCACTTGCCCCAACAGTCTGTAAAAGGCTATATGTGGGGATCTTGGT	scaffold_1	97.89	95	2	0	1	95		5952	5858	6e-42	172
scf1.16	XXXIII	43.489	<nnxnp>,(nn,np),nn,np,np,nn,nn,nn,np,nn,np,np,np,np,nn,np,np,np,np,nn,nn,nn,np,nn,np,nn,np,nn,nn,nn,np,np	TGCAGGGATGGCAAATCAGCGCCGCTAAACCGACTGTCACTCACCCATCGGCGACCGGAATACAACTGAACAAACTTTGCGTTTGGTGCAGTGCG	scaffold_1	100	95	0	0	1	95		178415	178321	1e-46	188
scf156	XXXIII	43.489	<hkxhk>,(hh,hk,kk),hk,HK,hh,hk,hk,kk,hk,kk,hk,hk,hh,hk,hk,hh,hk,hh,hk,hk,hk,kk,hh,hk,hk,hk,hh,hk,kk,hk,hh,hk	TGCAGGGCATCAAAGAAGATATATATTAGTAATTGCGAATAATTTGTCCAATTTAGTCATAATAATCAACTGGGCTGCTATTACAAAACAGAAGA	scaffold_156	100	95	0	0	1	95		326371	326465	1e-46	188
scf428.1	XXXIII	45.282	<lmxll>,(ll,lm),lm,ll,--,lm,lm,ll,--,ll,ll,ll,--,ll,lm,--,ll,--,ll,lm,lm,ll,--,--,ll,lm,--,lm,ll,lm,--,ll	TGCAGGCCTGTTGGCCAAAATGCAAAGCGGTGACGTATCATTCAGAGAGTGCATCCTTTTTCCCGAGCCAAGTGTCAACGCATCGATTCAAATCG	scaffold_428	98.95	95	1	0	1	95		438937	438843	2e-44	180
scf428	XXXIII	46.862	<lmxll>,(ll,lm),lm,ll,--,lm,lm,ll,--,ll,ll,ll,--,ll,lm,--,ll,--,ll,lm,lm,ll,--,--,ll,lm,--,lm,ll,lm,--,ll	TGCAGGGCGGAGGAACTGGGTCAAGGGTCACGGTAGACCTCGTGGGGAAGCCCCTGGAACCCTCTGGAGGGTTCGAGAAGGGAGGCGCGGCTAGG	scaffold_428	98.95	95	1	0	1	95		20490	20396	2e-44	180
16664	XXXIII	48.762	<efxeg>,(ee,ef,eg,fg),--,eg,fg,ef,ef,ee,fg,ee,eg,eg,fg,eg,ef,fg,eg,fg,eg,ef,ef,ee,fg,fg,eg,ef,fg,ef,ee,ef,fg,ee	TGCAGGTGGATCACAGACTTCCTGTCCTGACAGGAAGCAGTGCGTTAAGCTGGGAACACAAGTCTCTGACTCCAGGTCCATCAGCACCGGAACTC
scf964	XXXIII	53.21	<efxeg>,(ee,ef,eg,fg),--,ee,ef,fg,fg,eg,ef,eg,ee,ee,fg,ee,fg,fg,--,ef,ee,fg,fg,eg,ef,ef,ee,fg,--,fg,eg,fg,ef,eg	TGCAGGTTACCGCGCAGGGAGCATCAATGTAATTATTACCCAATGGACGGACATCATCAGCGCATTAGTGCGGGTGCCATGAAGCTCCCGTCGTC	scaffold_964	100	95	0	0	1	95		73051	72957	1e-46	188
scf179.2	XXXIII	55.569	<lmxll>,(ll,lm),ll,lm,ll,ll,ll,lm,ll,lm,lm,lm,ll,lm,ll,ll,lm,ll,lm,ll,ll,lm,ll,ll,lm,ll,ll,ll,lm,ll,ll,lm	TGCAGGAATTAGGTCAAGGCCGGGTTAAGGTTGAATGTCCTCTCGCCCCAAACCATGTGCACTACTATGTGCCACTGACCGTGACCTTGAAGCTG	scaffold_179	98.9	91	1	0	1	91		151008	151098	6e-42	172
scf1407	XXXIII	57.929	<hkxhk>,(hh,hk,kk),hk,hk,kk,hk,hk,hh,kk,hh,HK,hk,--,hk,hk,kk,hh,kk,hk,hk,hk,hh,kk,kk,hk,hk,kk,hk,hh,hk,kk,hh	TGCAGGACCGCGTGGTGCAGGTATGAGCAACGTCTGGATGGGCGGTCCTGCGGCCGTCTGGAACGCTCTTCTTTCTGACATTAAGATGCCACTGG	scaffold_1407	100	95	0	0	1	95		21348	21254	1e-46	188
scf428.3	XXXIII	57.929	<nnxnp>,(nn,np),nn,np,np,nn,nn,nn,np,nn,np,np,NP,np,nn,np,nn,np,np,nn,nn,nn,np,np,np,nn,np,nn,nn,nn,np,nn	TGCAGGGTGGTGTTGGAGATTTGACGCTTCCACGTTTCAAGCCTTAAAAGTCAAAATGTCATTCCCATTAAAATTAACGAGACAGCCGGTCTCAC	scaffold_428	100	95	0	0	1	95		429382	429476	1e-46	188
scf179	XXXIII	59.653	<lmxll>,(ll,lm),ll,lm,ll,ll,ll,lm,ll,lm,lm,lm,ll,lm,ll,ll,lm,ll,lm,ll,ll,lm,ll,ll,lm,ll,ll,ll,lm,ll,ll,lm	TGCAGGGGACATTACGGTTATGACTGCATTACATAATGCCTTATTATAAGGGGTAAAGGTGAAGGGCGGAGTCAGTCGAGAAGCTCCGGAAAAGG	scaffold_179	98.95	95	1	0	1	95		100783	100689	2e-44	180
scf179.1	XXXIII	59.653	<lmxll>,(ll,lm),lm,ll,lm,lm,lm,ll,lm,ll,ll,ll,lm,ll,lm,lm,ll,lm,ll,lm,lm,ll,--,lm,ll,lm,lm,lm,ll,lm,lm,ll	TGCAGGCCGGCAGGTGTCACCCTGTCATTACACAAGTATGGTGAGCTTACATCTCGCCTCGCCTGGTATATAGGAGGTTTTGGGTTCGATCCCGA	scaffold_179	100	95	0	0	1	95		100780	100874	1e-46	188
scf796	XXXIII	59.653	<hkxhk>,(hh,hk,kk),HK,hk,kk,hk,hk,hh,kk,hh,hk,hk,kk,hk,hk,kk,hk,kk,hk,hk,hk,hh,kk,kk,hk,hk,kk,hk,hh,hk,kk,hh	TGCAGGTTTCTATGTCCAAAGCACCGCTGCCATTTCCTTGCAAAGGGTTCCGAAGCTGACCATTGACTTGGTGTCCTTTGCAATCAAGCTCCACG	scaffold_796	97.89	95	2	0	1	95		38590	38684	6e-42	172
scf1.6	XXXIII	85.362	<hkxhk>,(hh,hk,kk),hk,hh,kk,hk,hk,hh,hh,hh,kk,hk,kk,hh,hh,kk,hk,kk,hk,hh,hh,hh,kk,hk,hh,hk,kk,hk,kk,hk,kk,hh	TGCAGGCAGGCCTCCGCCCGTGCTGGCAGGAGCGGACTGGTCGGCCGCCCTCAGTTTGCCCGAGACCGAGAGCTGGCTGGCGCACATGAGCGGAC	scaffold_1	98.95	95	1	0	1	95		485228	485134	2e-44	180
scf9026	XXXIII	91.239	<nnxnp>,(nn,np),np,nn,nn,np,np,np,nn,np,nn,nn,nn,np,NP,nn,nn,nn,nn,np,np,np,nn,np,np,np,nn,--,nn,np,nn,nn	TGCAGGACGTCAGCCCTTTATGCATAGAATAACAGTGCCATTAAAATGCTTAATTTAAAATCAGGTGAAAAAACCCTTGGGCCACATTGAGGGCA	scaffold_9026	98.95	95	1	0	1	95		159	65	2e-44	180
scf1.3	XXXIII	106.987	<hkxhk>,(hh,hk,kk),hk,hk,kk,hk,HK,hh,hk,hh,hk,hk,kk,hk,hk,kk,hk,kk,hk,hk,hk,hh,kk,hk,hk,hk,kk,hk,hk,hk,kk,hk	TGCAGGGAGTAGGGGTCACGCAGGGTGTGAGTTGGATGTTCGACCTTGGCGAATGGGCCTGCACCCTAGGCCCAACTCCGATAACGCTGTTAGTC	scaffold_1	100	95	0	0	1	95		5949	6043	1e-46	188
scf428.2	XXXIII	203.195	<nnxnp>,(nn,np),np,np,--,np,np,nn,--,nn,NP,np,--,np,NP,--,nn,--,np,np,np,nn,--,--,np,np,--,np,nn,np,--,nn	TGCAGGTCCTCAAGGTAGCCTTATATACGGTGGCAGGAGTGAAATGCAGGAATCATAAAACTTCTTGGAATTGTGTGAGGTTTGCGTAGATTCTG	scaffold_428	100	95	0	0	1	95		396816	396722	1e-46	188
scf4455	X	0	<nnxnp>,(nn,np),nn,nn,nn,nn,nn,nn,nn,nn,np,np,np,np,nn,nn,np,np,nn,np,nn,np,nn,np,nn,nn,nn,nn,nn,nn,np,np	TGCAGGGCCACACTGCGAGATGATGACATCCAGGGATAGAGAACGTGCATTTGGATTACCCGGGAGGGTGAAGGGTTGGGTTCAGTGAGCGAATA	scaffold_4455	100	95	0	0	1	95		6295	6201	1e-46	188
scf4912	X	0	<nnxnp>,(nn,np),np,np,np,np,np,np,np,np,nn,nn,nn,nn,np,np,nn,nn,np,nn,np,nn,np,nn,np,np,np,np,np,np,nn,nn	TGCAGGGTGGTAGTTGAACACCGCGTGGACGAGACGAAGCTGGCAGTGTCCTCATTGCAGGTGGAGGATTCAACGGGTTGAGTTCACGGCAACGG	scaffold_4912	98.95	95	1	0	1	95		11001	10907	2e-44	180
scf658.1	X	0	<nnxnp>,(nn,np),np,np,np,np,np,np,np,np,nn,nn,nn,nn,np,np,nn,nn,np,nn,np,nn,np,nn,np,np,np,np,np,np,nn,nn	TGCAGGCCCCGTGAGCGGAGAGCGAGCCTCCGAGGTACCGTGCTGAAAATGCTGCCGATGGTCTCGCTGGTGGAATCGAGGGTGGCAGCGCTGGA	scaffold_658	98.95	95	1	0	1	95		288363	288269	2e-44	180
scf4765	X	3.468	<nnxnp>,(nn,np),NP,np,np,np,np,np,np,nn,nn,nn,nn,nn,np,--,nn,nn,np,nn,np,nn,np,nn,np,np,np,np,np,np,nn,nn	TGCAGGCCAGGCTCACTGCCCTTTTCCCTCTGCGGGAAACATCACGATACATTATCGAAGTAGGAACCACTATGAGACCTCCTTTGCCAGTAGCA	scaffold_4765	100	95	0	0	1	95		291	197	1e-46	188
scf1146	X	6.935	<nnxnp>,(nn,np),np,np,np,NP,np,np,np,nn,nn,nn,nn,np,np,np,nn,nn,np,nn,np,nn,np,nn,NP,np,np,np,np,np,nn,nn	TGCAGGCCGCGGTGCCCGCGATCTCCAGGAAGATGAGCAAACCAATTACCTTGTGCGATGGGCGCGTCATCCCCACAGGTCCTAGCTCATAGCCT	scaffold_1146	100	95	0	0	1	95		47652	47746	1e-46	188
scf4629	X	10.385	<nnxnp>,(nn,np),--,np,np,np,np,np,np,nn,nn,nn,nn,np,--,--,nn,nn,np,nn,np,nn,--,nn,np,np,--,--,nn,--,nn,nn	TGCAGGGTATGTGAAGGTGCGGGCTATCCCAAAAATATTTTACACGTGTGACCCGTTTAATTTTTTCATGGTAGGACTATCCACTATGCAACACT	scaffold_4629	97.8	91	2	0	5	95		6186	6276	1e-39	165
scf8009	X	10.385	<hkxhk>,(hh,hk,kk),hh,HK,hk,hk,hk,hk,hk,hk,kk,hk,kk,hk,hh,HK,kk,kk,HK,hk,HK,hk,hh,kk,hk,hk,hh,hh,hk,hh,hk,kk	TGCAGGACCACAAAGGAAAGGAAAGAATCGATCGCTTAAATTTAATTGACACCCCCAATTTGGCCAATTCATTAAATTAAGTCAACGAGGGATAA	scaffold_8009	98.95	95	1	0	1	95		12261	12167	2e-44	180
scf9209	X	12.109	<efxeg>,(ee,ef,eg,fg),--,eg,eg,eg,eg,eg,eg,ef,ee,ef,ee,eg,fg,fg,ee,ee,eg,ef,eg,ef,fg,ee,eg,eg,fg,fg,ef,fg,--,ee	TGCAGGCGTGTGGCCAATGCAATGCATAATGTACAGGATGTCACCTTACGAGAAAGTAACACGTATACATGTATTTTGTATACACTTGGAAATGT	scaffold_9209	100	95	0	0	1	95		10259	10165	1e-46	188
scf4871	X	13.833	<hkxhk>,(hh,hk,kk),hh,hk,hk,hk,hk,hk,hk,hk,hk,hk,kk,hk,hh,hh,kk,kk,hk,hk,HK,HK,hh,kk,hk,hk,hh,hh,hk,hh,hk,kk	TGCAGGTCTCTCTGGATCAAAGCTGCACGCCACCACACACACAGAGAGACACACCAGAAGCAGTCAACCACGAGTGACTTAGATTACTCGACCAA	scaffold_4871	98.95	95	1	0	1	95		8290	8196	2e-44	180
scf348.3	X	18.627	<nnxnp>,(nn,np),nn,nn,nn,nn,--,nn,nn,np,--,np,--,nn,nn,nn,--,--,nn,np,nn,np,nn,--,nn,nn,nn,nn,np,--,np,--	TGCAGGGTAATATTAGCCAGAGCTAGCGGGGCAAAGACCAATTTAAAGTCTCCCACTTGGGCTCTGCTTTGCAACTTGTCTGCCGTATGCATCGC	scaffold_348	98.95	95	1	0	1	95		26408	26502	2e-44	180
scf109	X	19.091	<lmxll>,(ll,lm),ll,lm,ll,lm,lm,lm,lm,ll,lm,ll,lm,lm,ll,ll,lm,lm,lm,ll,lm,ll,ll,lm,lm,lm,ll,ll,ll,ll,ll,lm	TGCAGGCTGGTTGTATGCTGTATTTGCATACTACACCGGGAACTGCTGTGCTACACTCGGCTGTGGGCTTGTTGTATTAATCGACCCCTTTGCCG	scaffold_109	98.95	95	1	0	1	95		355898	355804	2e-44	180
scf109.1	X	19.091	<lmxll>,(ll,lm),--,lm,ll,lm,lm,lm,lm,ll,lm,ll,lm,lm,ll,ll,lm,lm,lm,ll,lm,ll,ll,lm,LM,lm,ll,ll,ll,ll,ll,lm	TGCAGGCCGGGACTCCCATCGTATTCTGACTCTGCTTGCTCTGTTACCCACCACCTCCCCATGCACTGCGATTATTTAAATTAATTTGCGGCTCT	scaffold_109	97.89	95	2	0	1	95		355895	355989	6e-42	172
scf12239	X	19.091	<lmxll>,(ll,lm),lm,ll,lm,--,ll,ll,ll,lm,ll,lm,ll,--,lm,lm,ll,ll,ll,lm,ll,lm,lm,ll,--,ll,lm,lm,lm,lm,lm,--	TGCAGGTGGTTCTTCTTTCGTGCGTACGTCTGTGTGTATGTTGAACTTCTTTCGCACCGTACGTAGGTAACCGTGCTTAATCGGTGGTGCGTCGG	scaffold_12239	100	95	0	0	1	95		221248	221342	1e-46	188
scf2093	X	19.091	<hkxhk>,(hh,hk,kk),kk,hk,kk,hk,hh,hk,hk,hk,hh,hk,hh,hk,--,kk,hh,hh,hk,hk,hk,hk,kk,hh,hk,hk,kk,kk,hk,kk,hk,hh	TGCAGGTAAGGAGTCGGTGCTCGTAGGAGGCAGTACAGTAAGTAGGACGCGAGCGTGGCGGATGTTTTTGAATGTTCGAGCGCATGGGATTTTTC	scaffold_2093	98.95	95	1	0	1	95		6475	6569	2e-44	180
scf2378	X	19.091	<lmxll>,(ll,lm),ll,lm,ll,lm,lm,lm,lm,ll,lm,ll,lm,lm,ll,ll,lm,lm,lm,ll,lm,ll,ll,lm,lm,lm,ll,ll,--,ll,ll,lm	TGCAGGATCCCTGGATAAATAAAGGACGTTGTTTTTCACGTGTAGAGTTCGTCTTCTATTGGGGCTCTGTAGAGCACCAGCGTGTGGCCGCTGCA	scaffold_2378	100	93	0	0	1	93		174709	174617	2e-45	184
scf348	X	19.091	<hkxhk>,(hh,hk,kk),hh,hk,hh,hk,kk,hk,hk,hk,kk,hk,kk,hk,hh,hh,kk,kk,hk,hk,hk,hk,hh,kk,hk,hk,hh,hh,HK,hh,hk,kk	TGCAGGCCAAACAGCAGAGTCTTTACAGAAGATCTAAACACGGCGCGTGAGCTCGCCTGAATAGCCACTGGTGGGAAGGCATTCCAGAGTTTGGG	scaffold_348	98.95	95	1	0	1	95		167922	167828	2e-44	180
scf348.1	X	19.091	<nnxnp>,(nn,np),--,--,nn,nn,NP,nn,nn,np,--,np,np,nn,nn,nn,NP,np,nn,np,nn,NP,nn,NP,nn,nn,nn,nn,--,nn,np,--	TGCAGGATTATTCATTCCGTGTTACGCATCGCAAAGGTTCTCGTCACACGAACGCTGATGCTCTGTCGCGATTGCCCGCGGGTGGCGGGTGTGCA	scaffold_348	97.89	95	2	0	1	95		335725	335631	6e-42	172
scf348.2	X	19.091	<nnxnp>,(nn,np),nn,nn,nn,nn,np,nn,nn,np,np,np,np,nn,nn,nn,np,np,nn,np,nn,np,nn,np,--,nn,nn,nn,np,nn,NP,np	TGCAGGGGCACGTCCAGTCGGGCTGTCGGGTTCCTCGACGGCGGCCCCCGGGGAGTCCGCCTTCCTACGACTCCCTGCTTTGTAAGCAGAGTCGC	scaffold_348	96.84	95	3	0	1	95		328708	328802	1e-39	165
scf497	X	19.091	<lmxll>,(ll,lm),ll,lm,ll,lm,lm,lm,lm,ll,lm,ll,lm,lm,ll,ll,lm,lm,lm,ll,lm,ll,ll,lm,lm,lm,ll,ll,ll,ll,ll,lm	TGCAGGTTGTGCCCCTCGCCAGGGATGAAAGCAATCACCTCCTCGCCATTGGAGAGTCGCACCTGTGGTGACAGCCCAGGGTGGCGTGGGGCTCC	scaffold_497	97.89	95	2	0	1	95		49724	49630	6e-42	172
scf8150	X	24.185	<nnxnp>,(nn,np),np,nn,nn,nn,np,nn,nn,np,np,np,np,nn,nn,nn,np,np,nn,np,nn,nn,nn,np,nn,nn,nn,nn,np,nn,np,np	TGCAGGTAGAGAGTCTCGCAGCGTGCAGTGATCTCCAATTGATCCTCCCTCCGACTCCGGGCTGGGTTACATGCGTGCACCATGACGCCGGGACA	scaffold_8150	98.95	95	1	0	1	95		18124	18218	2e-44	180
scf7683	X	24.885	<lmxll>,(ll,lm),ll,ll,ll,lm,lm,lm,lm,ll,lm,ll,lm,lm,ll,ll,lm,lm,lm,ll,lm,ll,ll,lm,lm,lm,ll,ll,ll,ll,ll,lm	TGCAGGTGCCACACTCCCAGTGCCGGGTTTGGGAACCAGCCCTCCTCCACCCTGCACACCGTGTCCCAACCCCATCGCAGCCTCCTCCACGATTA	scaffold_7683	100	95	0	0	1	95		2816	2722	1e-46	188
scf7683.1	X	30.679	<lmxll>,(ll,lm),LM,ll,ll,lm,lm,lm,lm,ll,lm,ll,lm,LM,ll,ll,lm,lm,lm,ll,lm,ll,ll,lm,lm,lm,ll,ll,ll,ll,ll,lm	TGCAGGTCAGCAACAAGGCGGATGGCCTGAAGCCAGACTGTGGCAACGAGACTGAAAGAAAGAGCGATCTTTGAAGGTCAAGTTGTTAATTGTCG	scaffold_7683	100	95	0	0	1	95		2813	2907	1e-46	188
scf1948.1	X	30.847	<nnxnp>,(nn,np),nn,nn,nn,nn,np,nn,nn,np,--,np,np,nn,nn,nn,--,np,nn,np,--,nn,nn,np,nn,nn,nn,nn,np,np,np,np	TGCAGGGGCAGTCAGGGTCCAGCAGGGGCAGTCGTTATATCCCTGGCCCGAAAGCAGGAGGGGGCTGCGGGGTGTCCTGGGATCCCCCGGAGCCC	scaffold_1948	100	91	0	0	1	91		44605	44515	2e-44	180
scf1948	X	36.473	<lmxll>,(ll,lm),ll,ll,ll,lm,lm,lm,lm,ll,lm,ll,lm,lm,ll,ll,lm,lm,lm,ll,lm,ll,ll,lm,lm,lm,ll,ll,ll,ll,ll,lm	TGCAGGTAAGTGTACACAGCCCATCGACATCGCAACAAATGTTTATCAAAAAACCTTCAAGTGCCGAATGCAAACCGCTTATAATGTGACCCTGG	scaffold_1948	100	95	0	0	1	95		44602	44696	1e-46	188
scf10679	X	37.394	<nnxnp>,(nn,np),nn,nn,np,NP,nn,np,np,nn,nn,nn,nn,np,np,np,nn,nn,np,nn,nn,NP,np,nn,np,np,np,np,nn,nn,nn,nn	TGCAGGGCTATCTGTCTTTTCTGTCTGTCAGCCTGTCAGCTTGTCAGTTTAAAAAAAAAAAATGAACGTTCAGAGAAATAAAAACATCACCCGTT	scaffold_10679	100	95	0	0	1	95		174952	174858	3e-25	117
scf3660	X	48.49	<lmxll>,(ll,lm),ll,ll,ll,lm,lm,lm,lm,ll,lm,ll,lm,lm,ll,ll,lm,ll,lm,ll,lm,ll,ll,lm,lm,lm,ll,ll,lm,ll,ll,lm	TGCAGGACATGTTCATCGTTCACACCATCGATGAGATACAGGTCAGCAGTGTTGGCACCCTTTACATTTTTTACTGATGATGCAATCATAATTTT	scaffold_3660	98.95	95	1	0	1	95		12708	12802	2e-44	180
scf3660.1	X	48.49	<lmxll>,(ll,lm),ll,ll,--,lm,lm,lm,lm,ll,lm,ll,lm,lm,ll,ll,lm,ll,lm,--,lm,ll,ll,lm,lm,lm,ll,ll,lm,ll,ll,lm	TGCAGGCTTGAATGTTAAACAGGGAGTACTGAGGGCTCTGCTCACTTTCGCCGTGTGTTTTGTGCTGAACAGGGCCGTATGTGTAGTATGCTAAC	scaffold_3660	100	95	0	0	1	95		1738	1832	1e-46	188
scf3581.1	X	51.828	<nnxnp>,(nn,np),np,nn,np,np,np,nn,np,np,np,np,nn,nn,nn,nn,NP,NP,nn,np,np,nn,nn,np,nn,nn,nn,nn,NP,np,--,np	TGCAGGGACCGCCTTCGTCTTCCCCAGCGGGCGACAATTATGCAAACAAACAAAAAACATACTCTGATAATATATGCAAGGACAATGCATATATT	scaffold_3581	100	95	0	0	1	95		31246	31152	1e-46	188
scf3581.2	X	51.828	<nnxnp>,(nn,np),NP,nn,np,np,NP,--,np,NP,np,np,nn,nn,nn,nn,--,np,nn,np,np,nn,nn,NP,nn,nn,nn,nn,np,np,NP,np	TGCAGGTCCGTCGGCACGTGACTTGCGTACGAATCCCACCTGGGGCGATTGTCGCTCTCGTCGCTGCGGCCAGGGGCGGAGCCAGGATTTCAGAC	scaffold_3581	100	95	0	0	1	95		31243	31337	1e-46	188
scf3581.3	X	51.828	<nnxnp>,(nn,np),np,nn,np,np,np,nn,np,np,np,np,nn,nn,nn,nn,np,np,nn,np,NP,nn,nn,np,nn,nn,nn,nn,np,np,np,np	TGCAGGCTGTCGTTGTTATTAGACTAAGGCTATGACTAATATGTAACGTTACGGACATTAACTAAGCTAACACTGCGCGACGTGGCTGTTAATTG	scaffold_3581	98.95	95	1	0	1	95		25777	25871	2e-44	180
scf95	X	51.828	<nnxnp>,(nn,np),np,nn,np,np,np,nn,np,np,np,np,nn,nn,nn,nn,np,np,nn,np,np,nn,nn,np,nn,nn,nn,nn,np,np,np,np	TGCAGGCGGCGTGAGCGCGGCTCGGGATGCCCCCCATAAGGTGGAGGGGCTAAGCCCCTGAAGCCCTGGAAGAACCCCCTATCGACCCGCCGCAT	scaffold_95	98.95	95	1	0	1	95		514561	514655	2e-44	180
24403	X	54.284	<efxeg>,(ee,ef,eg,fg),eg,ee,eg,fg,fg,ef,fg,eg,ef,--,ef,ef,ee,ee,fg,eg,ef,eg,fg,ee,ee,fg,ef,ef,ee,ee,fg,eg,fg,fg	TGCAGGCTGTTAAGGCTACACGGGGGATCTTTGGTGCGTGTGGGTAGACACACAAAGACAAAGATCCCCCACCCCCCCGTATAGCCTGAGCAGAC
scf1272	X	54.284	<hkxhk>,(hh,hk,kk),hk,kk,hk,hh,hh,hk,hh,hk,hk,hk,hk,hk,kk,kk,hh,hk,hk,hk,hh,kk,kk,hh,hk,hk,kk,kk,hh,hk,hh,hh	TGCAGGGGCAAGGGGATGGACCCGGACAGCAGGGAGCCAGCCCTGGGCAGAGGACAGAGGCGCGGGGCAGCAGCGAGCTGGACCGGGCAGACGCA	scaffold_1272	98.95	95	1	0	1	95		30617	30523	2e-44	180
scf2592	X	54.284	<lmxll>,(ll,lm),ll,ll,ll,lm,lm,lm,lm,ll,lm,ll,--,lm,ll,ll,lm,ll,lm,ll,lm,ll,ll,lm,lm,lm,ll,ll,lm,ll,lm,lm	TGCAGGAGAAGGTGCGCGTCGCCACGAATTAATCCCTCGCGCCACAACGGAGAGTTGCGGGTCGATCGCAGTATGCGAGGTGTCTGTGAAAAGTA	scaffold_2592	97.89	95	2	0	1	95		48172	48266	6e-42	172
scf6159	X	54.284	<efxeg>,(ee,ef,eg,fg),eg,ee,eg,--,fg,ef,fg,eg,ef,eg,ef,ef,ee,ee,fg,eg,ef,eg,fg,ee,ee,fg,ef,ef,--,ee,fg,eg,fg,fg	TGCAGGGACCAGTTAATTACTTGGGGGAAATAGACGATGGGAATGATGTATACAGTTAAATGCAACTTGTGTTGAATTCTATATTGCCACCCTCA	scaffold_6159	98.95	95	1	0	1	95		3962	4056	2e-44	180
scf6159.1	X	54.284	<nnxnp>,(nn,np),NP,nn,np,NP,np,nn,np,np,nn,np,nn,nn,nn,nn,np,np,nn,np,np,nn,nn,np,nn,nn,nn,nn,np,np,np,np	TGCAGGGTGGGCTGGTAGGAACATTGGAATTTTTGAAAGGGGACGGACGGACGGACACATTAATCTATTGCAGGCTGGTACACTCAGTTTACAAC	scaffold_6159	100	95	0	0	1	95		3965	3871	1e-46	188
scf6159.2	X	54.284	<nnxnp>,(nn,np),np,nn,np,NP,np,nn,np,np,nn,np,nn,nn,nn,nn,np,np,nn,np,np,nn,nn,np,nn,nn,nn,nn,np,np,np,np	TGCAGGGGCTCCGGTGAGCGTGCTCACACGGGAGGGGGGAGATGCTCGCACTCCCGCGCCGGTCGCAATTCTTTATTAGCCAGGCTGTGCTGGTC	scaffold_6159	100	95	0	0	1	95		17212	17306	1e-46	188
scf661	X	54.284	<lmxll>,(ll,lm),ll,ll,ll,lm,lm,lm,lm,ll,lm,ll,lm,lm,ll,ll,lm,ll,lm,ll,lm,ll,ll,lm,lm,lm,ll,ll,lm,ll,lm,lm	TGCAGGGCAGCTCAAGGTGGCAGCCAGCATTTTGCAGCAGCCGAATATCCGGTTATCCCGATTACCGACTGCAGCAGCTCCGCCCCTGCATGAGG	scaffold_661	96.84	95	3	0	1	95		21865	21771	1e-39	165
scf3581	X	57.938	<lmxll>,(ll,lm),ll,ll,ll,lm,lm,lm,lm,ll,lm,ll,lm,lm,ll,ll,lm,ll,ll,ll,lm,ll,ll,lm,lm,lm,ll,ll,lm,ll,ll,lm	TGCAGGCCACCAAGCGCACGGCGGCGGAGATCTACCTGCTGAACCTGGCCTGCGCCGACCTCCTCTTCGTTTGCACGCTGCCGCTGTGGGCCATC	scaffold_3581	100	95	0	0	1	95		8909	9003	1e-46	188
scf12985	X	59.828	<hkxhk>,(hh,hk,kk),hk,kk,--,hh,hh,hk,hk,hk,hk,hk,hk,hk,kk,kk,hh,hk,kk,hk,hh,kk,kk,hh,hk,hk,kk,kk,hh,hk,hk,hh	TGCAGGGACCTGTTTTATCATCCTACAGCTTCTTGATGGGGGGTCGGTGTCCCCCAAAGCCTCCAGTGGACTTCACCGTGCCAGGTGGTTGGACA	scaffold_12985	100	95	0	0	1	95		181837	181743	1e-46	188
scf2130	X	64.347	<nnxnp>,(nn,np),nn,np,nn,nn,nn,NP,nn,nn,np,nn,np,np,np,np,nn,nn,np,nn,nn,np,np,np,np,np,np,np,nn,nn,np,nn	TGCAGGATAAATAAAGATTCTGATGATTATGCTGGGATTGAACCCTGGCAATAATCAGAGCCTCCCTTGTACTCTGAGCCCTCAGCCACCTCTCC	scaffold_2130	98.95	95	1	0	1	95		49070	49164	2e-44	180
scf385	X	66.55	<lmxll>,(ll,lm),ll,ll,ll,lm,lm,LM,ll,ll,lm,ll,lm,lm,ll,ll,lm,ll,ll,ll,lm,ll,ll,lm,lm,lm,ll,ll,lm,ll,lm,lm	TGCAGGGACCTGTTTTTACCACATGTGACCACACTGATCAGTCTGGGTTGGTAAAAGCTGGGAGAGCATAAGATGTGAGCAGCATAGTGCAGACA	scaffold_385	98.95	95	1	0	1	95		132827	132733	2e-44	180
scf1147	X	69.042	<nnxnp>,(nn,np),np,nn,np,np,np,nn,np,np,nn,np,nn,nn,nn,nn,np,np,nn,np,np,nn,nn,nn,np,np,nn,nn,np,np,nn,np	TGCAGGTTATCAGCGTTAATGCATTTGGGTGTGGTCCCCATAGAGTTACGCATTGGAGGTAAACCTCATGGCCAGCTGTACAGTACATGGGCTGG	scaffold_1147	100	95	0	0	1	95		35032	35126	1e-46	188
scf1147.1	X	71.306	<nnxnp>,(nn,np),nn,np,nn,nn,nn,np,nn,nn,np,nn,np,np,np,np,nn,nn,np,nn,nn,np,np,np,nn,nn,np,nn,nn,nn,np,nn	TGCAGGCAACGTTTATCTCTGCCAACGCGGTATATTATTAATTCATTTGTTCTCAAGCGTACATCGCTAAACAGGCCATGTAATATTTCTTCATT	scaffold_1147	100	95	0	0	1	95		35035	34941	1e-46	188
scf1147.2	X	74.125	<nnxnp>,(nn,np),--,np,nn,nn,nn,np,nn,--,np,nn,np,np,np,np,nn,--,np,--,nn,np,np,np,nn,nn,np,np,nn,nn,np,nn	TGCAGGAGGGCCAGGCCCTGAGGGACCCCGAGAATCATCCCCAGGGGTGGTCGGGGCTCCAGGGGTCCCTCGACGAGGGGCAGGCACACGAGATG	scaffold_1147	98.95	95	1	0	1	95		30130	30036	2e-44	180
scf9613	X	83.725	<nnxnp>,(nn,np),np,nn,nn,nn,np,nn,NP,np,nn,np,nn,nn,nn,nn,np,np,np,nn,np,nn,nn,nn,np,np,nn,nn,np,np,nn,np	TGCAGGCCTCGAAATTTGAACGCAACCATTGTTAATTGCACAAAAATGAATTACAAGTGATTACAGTGATGCGGAGGATGGTTACTACCCTTCTG	scaffold_9613	100	95	0	0	1	95		1230	1136	1e-46	188
scf123.2	X	91.046	<nnxnp>,(nn,np),nn,np,nn,nn,nn,np,nn,nn,np,nn,np,np,np,np,nn,nn,nn,nn,nn,NP,np,np,nn,nn,np,np,nn,nn,np,nn	TGCAGGTTTAGCAATTTTGTTCCGTAAATTAATGTATCTTCCTCACAGCCCAGAAAACAAATAGATATTATCTTGTAAACGGTGGCATTGCATGG	scaffold_123	100	95	0	0	1	95		268759	268853	1e-46	188
scf9613.1	X	91.046	<nnxnp>,(nn,np),nn,np,nn,nn,nn,np,nn,nn,np,nn,np,np,np,np,nn,nn,nn,nn,nn,np,np,np,nn,nn,np,np,nn,nn,np,nn	TGCAGGCGTAGGCCGACATACCTTTTAGAGCAGTGCTTCTTAACAGTTACTGCAGCCTTGCACCCCCTTGGTTCTCAATTATTAAAACAAATGTA	scaffold_9613	96.84	95	3	0	1	95		868	774	1e-39	165
scf123	X	93.31	<nnxnp>,(nn,np),nn,np,nn,nn,np,np,nn,nn,np,nn,np,np,np,NP,nn,nn,nn,nn,nn,np,np,np,nn,nn,np,np,nn,nn,np,nn	TGCAGGCAAAGCATAGCTAGTGCACTAACTCTACGGGATTACTTTTCAGGATATAATACAATATCGTTGATCTTAAAAGCGACTCAGAAATCGCA	scaffold_123	98.95	95	1	0	1	95		187983	188077	2e-44	180
scf123.1	X	93.31	<nnxnp>,(nn,np),nn,np,nn,nn,np,np,nn,nn,np,nn,np,np,np,np,nn,nn,nn,nn,nn,np,np,np,nn,nn,np,np,--,nn,np,nn	TGCAGGGTGCCAATGTCACGGCCGGGGTCCGCGTGCAGCCAAACCCTTCGCGTGCGGGGCCAACGTGTGCCCAGCAACCCGCCCCGTGGATGTGA	scaffold_123	98.95	95	1	0	1	95		211712	211806	2e-44	180
scf1842	X	99.266	<hkxhk>,(hh,hk,kk),hk,hk,hk,hh,hk,kk,hk,kk,hk,hh,hk,hk,kk,kk,hh,hk,hk,hk,hh,kk,--,hk,hh,hk,kk,hk,hh,hk,hk,hh	TGCAGGGGTGTGAGCGAGAGATTTCAGGGCTGCGCCTTTACCCTTCACCTGAGCACGAGTTCAAAAGAACTCACAAACAAACACCTTGTTATAAT	scaffold_1842	100	95	0	0	1	95		17963	17869	1e-46	188
scf9804.2	X	104.966	<hkxhk>,(hh,hk,kk),hk,hk,hk,kk,hk,hh,hk,hh,hh,kk,hk,hk,hh,hh,kk,hk,hk,hk,kk,--,--,hk,kk,hk,hh,hk,kk,kk,hk,hk	TGCAGGAGCTAATAGCGACGCCCTGGCTGTCCCATCAGAGACGGGAATCGCAGGAACAGCGGGCAGCCCATTCACGAAATTGCATCGTTTTATTG	scaffold_9804	100	94	0	0	1	94		493059	492966	4e-46	186
scf1278.1	X	109.268	<nnxnp>,(nn,np),nn,nn,nn,nn,--,np,nn,np,np,nn,np,np,nn,np,nn,nn,nn,nn,nn,np,nn,NP,nn,nn,np,nn,nn,nn,np,np	TGCAGGTTAGTTTATTAAAACATGCTGATGGAGATGTTAAATGTTTAAAGTTTAGCGTTGTCGATAGGCTTTGAGTCGAATTATGATGAATTGGT	scaffold_1278	100	95	0	0	1	95		212489	212583	1e-46	188
scf1168	X	112.882	<hkxhk>,(hh,hk,kk),hh,hh,hh,hk,kk,hk,hh,hk,hk,hk,kk,kk,hh,hk,hk,hh,hh,hh,hk,hk,hk,kk,hk,hh,hk,kk,hk,hk,kk,kk	TGCAGGACTACAGGTGACCAGGATGCCAGCACCGGACCCATCGGCGTCCATGGCTGAAGACGCAGCCGCAGCATCGGCCGAGGACTAGGCCACAG	scaffold_1168	98.95	95	1	0	1	95		6703	6797	2e-44	180
scf1168.1	X	112.882	<nnxnp>,(nn,np),np,np,NP,np,nn,nn,np,nn,nn,np,nn,nn,np,nn,np,np,np,np,np,nn,nn,nn,np,NP,nn,nn,np,NP,nn,nn	TGCAGGAGGTTTCTTATTTATAAACATTTGCAAATCCCTACGGGCATTGGGAACTGTGTACAGAGAAGGATTTTGAGATATGCACTGGAGTGTGC	scaffold_1168	100	95	0	0	1	95		38784	38690	1e-46	188
scf1278.2	X	112.882	<nnxnp>,(nn,np),nn,nn,nn,nn,np,np,nn,np,np,nn,np,np,nn,np,nn,nn,nn,nn,nn,np,np,np,nn,nn,NP,np,nn,nn,np,np	TGCAGGGGAAGCAAGCAAGTACGGCCACGGTCGGGAAATAATGGCTGTGCAAAAACATCACTTCGCTGTACCCCAATTGCAGTGATGGCGCTCGG	scaffold_1278	100	95	0	0	1	95		215217	215311	1e-46	188
scf482.1	X	112.882	<nnxnp>,(nn,np),np,np,np,np,nn,nn,np,nn,nn,np,nn,nn,np,nn,np,np,np,np,np,nn,nn,nn,np,np,nn,nn,np,NP,nn,nn	TGCAGGGATCATGTGAACCCCCTACATACATGAGAATGAAAAAAACCCTATAAGGTCTTACAACGCAAATGAATATATGTATCGTGAGCTTAACA	scaffold_482	100	95	0	0	1	95		23046	23140	3e-34	147
617	X	115.062	<efxeg>,(ee,ef,eg,fg),ee,ee,ee,ef,fg,eg,ee,eg,eg,ee,fg,fg,ee,eg,--,ee,ee,ee,ef,eg,eg,fg,ef,ee,--,fg,ef,ef,--,--	TGCAGGGCTTCGACAAGTACCGTGCGCAGCTCGACAACAAGAGTGAGTGCTGACGCACGCCAGTGGGAGGGTGGTGGTGGCTGCAGCGGCGGCGG
scf1842.1	X	118.616	<nnxnp>,(nn,np),np,np,np,np,nn,nn,np,nn,nn,np,nn,nn,--,nn,np,np,np,np,np,nn,nn,nn,np,np,nn,nn,np,np,nn,np	TGCAGGCATAAGGGCCTCAACGAGAGGGGGCTCTCAAGGGGCTTTGTTTTCTATTTCCACGCTGACCAGACGTCTTGCAGCTGAACATACCCACA	scaffold_1842	100	95	0	0	1	95		17960	18054	1e-46	188
scf9804	X	122.73	<hkxhk>,(hh,hk,kk),hk,HK,HK,kk,hk,hh,--,hh,hh,kk,--,hk,hh,hh,kk,hk,hk,hk,kk,hh,hh,hk,kk,hk,hh,hk,kk,kk,hk,hk	TGCAGGAGGCAATGGGCGCGCTCGGCGGCAGCGCCGAACCGGCCGCCACCGCCACTTCGTCGTCGTCTTCATCTTCCTCCTCGTTGTCGTCGTCC	scaffold_9804	98.95	95	1	0	1	95		338826	338920	2e-44	180
scf9804.1	X	129.089	<hkxhk>,(hh,hk,kk),hk,hh,hk,hh,hk,kk,kk,kk,hk,hh,hk,hk,kk,kk,hh,hk,hk,hk,hh,kk,kk,hk,hh,hk,kk,hk,hh,hh,hk,kk	TGCAGGCCTACCGCTTGCCACCACTCTCTCGCACGCCGCTCAACCCCCAGCCCGACCACGTCGCGTTTCCTGGGCCGTGCCGTGCCTGACCACAG	scaffold_9804	98.95	95	1	0	1	95		306052	306146	2e-44	180
scf8009.1	X	200.375	<nnxnp>,(nn,np),nn,np,np,np,np,np,np,np,--,np,--,np,nn,nn,--,--,np,np,np,np,nn,--,np,np,nn,nn,np,nn,np,--	TGCAGGGAGACGCTGCTGACTCCCCCCATCGTATCGCCCAATAAATATATTTTATCTGCCACGCGCAGAACCCTCTTTATGCAACGAGGAACAAA	scaffold_8009	98.95	95	1	0	1	95		2518	2612	2e-44	180
scf1087	III	0	<hkxhk>,(hh,hk,kk),hk,hh,kk,hk,hk,hk,hh,hk,hh,hk,hk,hh,hk,kk,hk,hk,hk,hh,hh,hh,hk,kk,hk,kk,hk,hh,kk,hk,hk,kk	TGCAGGTCGCTTGCGGGGGTTACTCGCGCCTCTTCCAAGAAGTGTGACCGCCCTAGAAGAGTAGGCCAAATACCCTCTGCAGAGTGGCTCTCCAG	scaffold_1087	100	95	0	0	1	95		20956	21050	1e-46	188
scf181	III	0	<lmxll>,(ll,lm),ll,lm,ll,lm,lm,lm,lm,ll,lm,lm,lm,lm,ll,ll,ll,lm,ll,lm,lm,lm,lm,ll,ll,ll,lm,lm,ll,lm,lm,ll	TGCAGGCTTTGAGGTATTCATAAACAAGTGTGCCACTTTCAGTAATTCCCTCCAACATAGAGTGTCACATAGTGTCGCATCAGTGTTACCTTCAC	scaffold_181	100	95	0	0	1	95		379042	379136	1e-46	188
scf29	III	0	<hkxhk>,(hh,hk,kk),hk,hh,kk,hk,hk,hk,hh,hk,hh,hk,hk,hh,hk,kk,hk,hk,hk,hh,hh,hh,hk,kk,hk,--,hk,hh,kk,hk,hk,kk	TGCAGGGTGTTGGTGGCGTGCTCCGCGTCTCCATGCGGAGACCGAGGCCCATGCGGACAGAGAGCCTGCGTCCACATGCTCGCTGCATCAGCGGA	scaffold_29	98.95	95	1	0	1	95		625459	625365	2e-44	180
scf29.2	III	0	<hkxhk>,(hh,hk,kk),hk,kk,hh,hk,hk,hk,kk,hk,kk,hk,hk,kk,hk,hh,hk,hk,hk,kk,kk,kk,hk,hh,hk,hh,hk,kk,hh,hk,hk,hh	TGCAGGGTCTGCTGCGCCTGTATACACCTGGCGATCTTGAGCGAAGACACCTCCCCATTCTCGGCGGGAAGCACAGTACGGAGGTCCTTGGTGAG	scaffold_29	98.95	95	1	0	1	95		625456	625550	2e-44	180
scf5948.1	III	0	<nnxnp>,(nn,np),np,np,nn,nn,nn,nn,np,np,np,nn,nn,np,np,nn,np,nn,np,np,np,np,nn,nn,np,nn,--,np,nn,nn,nn,nn	TGCAGGGACGGCGTGAGTGCGTTGCCAGGGGCAACAACTCGTGTCGGCGTTTCGCGCATGCGCAGCAGCAGCGAGCCGGTCGGCAAAAGTAAATA	scaffold_5948	100	95	0	0	1	95		6046	6140	1e-46	188
scf633	III	0	<efxeg>,(ee,ef,eg,fg),fg,eg,ef,ee,ee,ee,eg,fg,eg,ee,ee,eg,fg,ef,fg,ee,fg,eg,eg,eg,ee,ef,fg,--,ee,eg,ef,ee,ee,ef	TGCAGGTTACATTCATGTTGAATATACAGTGAGGAAAAAAAGTATTTGATCCCCTGCTGATTTTGTACGTTTGCCCACTGCTAAAGAAATCATCA	scaffold_633	98.95	95	1	0	1	95		111285	111191	8e-32	139
scf633.1	III	0	<hkxhk>,(hh,hk,kk),hk,hh,--,hk,hk,hk,hh,hk,hh,hk,hk,hh,hk,kk,hk,hk,hk,hh,hh,hh,hk,--,hk,kk,hk,hh,kk,hk,hk,kk	TGCAGGCCGGCACTCGTGGACGGCGGTAATGTTTGACACTTGCGCTCCCGCGGGCATGTTTTCGGTGAGTGTAAGTGTCAAACATTTGAACATTC	scaffold_633	98.95	95	1	0	1	95		261733	261639	2e-44	180
scf633.3	III	0	<nnxnp>,(nn,np),np,np,nn,nn,nn,nn,np,np,np,nn,nn,np,np,nn,np,nn,np,np,np,np,nn,nn,np,nn,nn,np,nn,nn,nn,nn	TGCAGGAATTATGGGCTGAGTTGATGCCTGACCAGGGTTCGAGCTATCCTCTTTCTGATTTGGAGCCGAGTGCCCTGCCACAGACAGCACAGCAC	scaffold_633	100	95	0	0	1	95		205699	205793	1e-46	188
scf87.4	III	0	<hkxhk>,(hh,hk,kk),hk,kk,hh,hk,hk,hk,kk,hk,kk,hk,hk,kk,hk,hh,hk,hk,hk,kk,kk,kk,hk,hh,hk,hh,HK,kk,hh,hk,hk,hh	TGCAGGGCACAGGGCATGGGGACACCATGATCGGGCGCATGGCCGCCAACGGACGGGTCAGGGCGCGAGAGTCACAGATGCATCCCAGCTGTTGC	scaffold_87	98.95	95	1	0	1	95		550412	550506	2e-44	180
scf87.5	III	0	<hkxhk>,(hh,hk,kk),hk,hh,kk,hk,hk,hk,hh,hk,hh,hk,hk,hh,hk,kk,hk,hk,hk,hh,hh,hh,hk,kk,hk,kk,hk,hh,kk,hk,hk,kk	TGCAGGTCCCGCACAGCGTGGTGAGGCACACCACCCTCTCGCTCATCTCGCTCATGCTGACGCGGATGCTCGGCAGCATGGAGCGCTGCGGTGCT	scaffold_87	98.95	95	1	0	1	95		550415	550321	2e-44	180
scf8869	III	0	<nnxnp>,(nn,np),nn,nn,np,np,np,np,nn,nn,nn,np,np,nn,nn,np,nn,np,nn,nn,nn,nn,np,np,nn,np,np,nn,np,np,np,np	TGCAGGTTCTGTTTATTTCCTCCTTTCCCATACAAGGTGTCACATTGGGATCCACGGATGAAATGCGCCTTACAAATGTAAATTATGATATGTTG	scaffold_8869	100	95	0	0	1	95		406	312	1e-46	188
scf973.1	III	0	<nnxnp>,(nn,np),nn,nn,np,np,np,np,nn,nn,nn,NP,np,nn,nn,np,nn,np,nn,nn,nn,nn,np,np,--,np,np,nn,np,np,np,np	TGCAGGCCCTGAAAGATTTAGATATGATGATCAGCAATATTAATGTTCGCTCTGTGCTCACGATTCTTACAGCTGCAGGGCTAGACTTTGTCATT	scaffold_973	98.95	95	1	0	1	95		47361	47455	2e-44	180
scf1804	III	1.725	<hkxhk>,(hh,hk,kk),kk,hk,hk,hh,hh,hh,hk,kk,hk,hh,hh,hk,hk,hk,kk,hh,kk,hk,hk,hk,hh,hk,kk,HK,hh,hk,hk,hh,hh,hk	TGCAGGCGAGGAACCAAGGTACAATTAGCTCACGCGGTCTGGAATGAGTGAGCGCACGTACGCGCATTTCCCGTGACAGGCGCTTCCCTTTTATA	scaffold_1804	100	95	0	0	1	95		195404	195498	1e-46	188
scf462.1	III	1.725	<lmxll>,(ll,lm),lm,ll,lm,ll,ll,ll,ll,lm,ll,ll,ll,ll,ll,lm,lm,ll,lm,ll,ll,ll,ll,lm,lm,lm,ll,ll,lm,ll,ll,lm	TGCAGGATTGTACTCACTGCCAGCCCACGGGAGCATTAGAACGTGAACTTCGGTGTTCACGATTCCCGGTGACAGAGCCAGCATGCCGAGCTGCT	scaffold_462	96.84	95	3	0	1	95		110595	110501	1e-39	165
scf5877	III	1.725	<lmxll>,(ll,lm),ll,lm,ll,lm,lm,lm,lm,ll,lm,lm,lm,lm,lm,ll,ll,lm,ll,lm,lm,lm,lm,ll,ll,ll,lm,lm,ll,lm,lm,ll	TGCAGGCAAATCTGAAGCTCCCTCCGGGGATGAGTTGAGATTTCCCATATCTGTCGCTGATTTGTAACGACGATTACACAAAATAAACCCCTCGG	scaffold_5877	100	95	0	0	1	95		4063	4157	1e-46	188
scf11816	III	3.45	<lmxll>,(ll,lm),ll,lm,ll,LM,lm,lm,lm,ll,lm,lm,lm,lm,lm,ll,ll,lm,ll,lm,lm,lm,lm,ll,ll,ll,lm,ll,ll,lm,lm,ll	TGCAGGGACCTGTTATCACTTCTCCATATTAGTGGTTTGATATTTACATCAGCCAATTTCATTAAAAAATATATATACACGTAAGTTTAATATTT	scaffold_11816	97.89	95	2	0	1	95		3849	3943	6e-42	172
scf2962	III	3.45	<lmxll>,(ll,lm),ll,lm,ll,lm,lm,lm,lm,ll,lm,lm,lm,lm,lm,ll,ll,lm,ll,lm,lm,lm,lm,ll,ll,ll,lm,ll,ll,lm,lm,ll	TGCAGGGGTAAGTGTTGTTAGCGGTACCTATGAAGTCAAGAACGCACACGAAGGGGTGGCTGGCCAGCACCACAACTGCCTTTGTCTGCCCAGCG	scaffold_2962	100	93	0	0	1	93		12023	11931	2e-45	184
scf3644	III	3.45	<lmxll>,(ll,lm),ll,lm,ll,lm,lm,lm,lm,ll,lm,lm,lm,lm,LM,ll,ll,lm,ll,lm,LM,lm,lm,ll,ll,ll,lm,ll,ll,lm,lm,ll	TGCAGGGACCTCAAGGATAACCGGCATCATTGGCAGCATCTTCATCCTTTGGAAAAAGCAAGCTGCTGCGAGGATAACATCATCATCACCATCGC	scaffold_3644	100	95	0	0	1	95		6626	6720	1e-46	188
scf5948	III	3.45	<efxeg>,(ee,ef,eg,fg),fg,eg,ef,ee,ee,ee,eg,fg,eg,ee,ee,eg,eg,ef,fg,ee,fg,eg,eg,eg,ee,ef,fg,--,ee,fg,ef,ee,ee,ef	TGCAGGGGGGACGCCATTTCTCATTTAAAATGCAAATAATGTACACGCAACGCTGAGGTAAATTCATCAAAGTGTAACGTCCTCTTCTCTCCCGC	scaffold_5948	100	95	0	0	1	95		6049	5955	1e-46	188
scf6797	III	3.45	<efxeg>,(ee,ef,eg,fg),eg,fg,ee,ef,ef,ef,fg,eg,fg,ef,ef,--,fg,ee,eg,ef,eg,--,fg,fg,ef,ee,eg,ee,ef,eg,ee,ef,ef,ee	TGCAGGCCAGTATTCTAGAATGCACGAGTCGTAATGCACGGAATGTACAATGCAAAGATGCAGTACACACGAGGTGGCAGTGTGTGCTAGAATCA	scaffold_6797	98.95	95	1	0	1	95		147136	147042	2e-44	180
scf6797.1	III	3.45	<efxeg>,(ee,ef,eg,fg),fg,eg,ef,ee,ee,ee,eg,fg,eg,ee,ee,eg,eg,ef,FG,ee,fg,eg,eg,eg,ee,ef,fg,ef,ee,fg,ef,ee,ee,ef	TGCAGGTCGGTGCATGAGCGAACAGTTTGCATATAATTCACATCATTCGCGATGCCTCGAGCGTCAGAATTAATTTCGACCGACAAACGGATGGA	scaffold_6797	100	95	0	0	1	95		147133	147227	1e-46	188
scf905	III	3.45	<lmxll>,(ll,lm),lm,ll,lm,ll,ll,ll,ll,LM,ll,ll,ll,ll,ll,LM,lm,ll,lm,ll,ll,ll,ll,lm,lm,lm,ll,lm,lm,ll,ll,lm	TGCAGGGCGACCTCAACGCACCCACTCAGTACAAGGTGGGCGCCAGAGTGGTGATGCTTGTGCCTCGGTACGAAGGTCATTCATGGTTATAATCC	scaffold_905	100	95	0	0	1	95		61347	61253	1e-46	188
scf2962.1	III	4.203	<lmxll>,(ll,lm),lm,ll,lm,ll,--,--,ll,lm,ll,ll,--,ll,ll,lm,lm,--,lm,ll,ll,ll,ll,--,lm,--,--,lm,--,--,ll,--	TGCAGGCGGCGACCCAGGAGGCGGAGGCCGACGAGGTGGCCAGGGCCTTGCCAGCCACCGCGTGTCCCTCCGCAGGTGCGCCGCCGCGGTTTCTT	scaffold_2962	98.94	94	1	0	1	94		33315	33408	1e-43	178
scf87.9	III	4.297	<nnxnp>,(nn,np),np,np,nn,nn,nn,nn,np,NP,np,nn,nn,np,np,nn,np,nn,np,np,np,np,nn,nn,np,nn,nn,np,nn,nn,nn,nn	TGCAGGGTCCTCATGAGCTGCGTCACTATTCTTACCAGCAGATTGAGCACTCAAACATGCCGACTGCGAAGTGTCATCATTAGCTGCACTATTCT	scaffold_87	100	95	0	0	1	95		147951	148045	1e-46	188
scf973	III	4.297	<nnxnp>,(nn,np),nn,nn,np,np,np,np,nn,nn,nn,np,np,--,nn,np,nn,np,nn,nn,nn,nn,np,np,nn,np,np,nn,np,np,--,np	TGCAGGGACCTGTTATGCCTATGTCGTGACATCGGTGGATGTCAACAGGCTGTGGGCGCAGTACCGGCCCTAGAGGAGCCCGGTGTAAGCTGAAT	scaffold_973	96.84	95	3	0	1	95		52817	52723	1e-39	165
scf8717	III	5.145	<efxeg>,(ee,ef,eg,fg),eg,fg,ee,ef,ef,ef,fg,eg,fg,ef,ef,fg,fg,ee,eg,ef,eg,fg,fg,fg,ef,ee,eg,ee,ee,eg,ee,ef,ef,ee	TGCAGGTTCGACGTTTTCTAAATGACGCACTGCCTCAATGTTGCATAGGTCGCACGGAACCCCAAGACTTGGGGCTACACGCCTTGGCCCCCAAG	scaffold_8717	98.95	95	1	0	1	95		1624	1718	2e-44	180
scf633.2	III	8.026	<nnxnp>,(nn,np),np,np,nn,nn,nn,nn,np,np,np,nn,nn,np,np,nn,np,nn,np,np,np,np,nn,nn,np,nn,NP,np,nn,nn,nn,nn	TGCAGGGTTCATAAAAGGAAGACCACTTAATGGGAAGTCAACAATAGCTGTGCAATCCAGAGATCGTCCCCATCAGAATGAATGAGGGACTGATT	scaffold_633	100	95	0	0	1	95		205702	205608	1e-46	188
scf116.2	III	14.035	<hkxhk>,(hh,hk,kk),kk,hk,hk,hh,hh,hh,hk,kk,hk,hh,hh,hk,hk,hk,kk,hh,hk,hk,hk,hk,--,hk,HK,hk,HK,hk,hk,hh,hh,hk	TGCAGGGGATTTAGACCTCGCCTAACTTAAATGTGAAAGGTAAGCATAGTGCCAGGTGTGTGTGCAGTGGTTTTTTGCACTTAAATTCGATTCAT	scaffold_116	98.95	95	1	0	1	95		393702	393608	2e-44	180
scf116	III	17.445	<efxeg>,(ee,ef,eg,fg),--,eg,ef,ee,ee,ee,eg,--,eg,ee,ee,eg,eg,ef,--,ee,eg,eg,eg,eg,ee,ef,--,ef,ee,ef,ef,ee,ee,ef	TGCAGGAATTGTATTTGTTTCCTACGATTCCACCCTGACCTTGAGAGCTTGGATAACTGCATCAACGTCTCCTGGAACTTAGCTTTGCATCGCCA	scaffold_116	98.95	95	1	0	1	95		449935	449841	2e-44	180
scf116.1	III	17.495	<hkxhk>,(hh,hk,kk),kk,hk,hk,hh,hh,hh,hk,kk,hk,hh,hh,hk,hk,hk,kk,hh,hk,hk,hk,hk,hh,hk,kk,hk,hh,hk,hk,hh,hh,hk	TGCAGGCACCAAATGCCCAAGACCAGATGCCTCCTTTCCAGTTGGTAGGGTAGAGTGCAGCTCCCTTGACGTGCACAACAACACAGACAATGGCC	scaffold_116	100	95	0	0	1	95		387590	387496	1e-46	188
scf116.3	III	17.495	<nnxnp>,(nn,np),np,np,nn,nn,nn,nn,np,np,np,nn,nn,np,np,nn,np,nn,np,np,np,np,nn,nn,np,nn,nn,nn,nn,nn,nn,nn	TGCAGGAATAATCTTCGAGTCCTATAATTTCTCCCACTAATTTAACTTATGCCATTTTAAAATCTCCATTCAATTGAATGGGATTCGAGCAGGAA	scaffold_116	100	95	0	0	1	95		368269	368363	1e-46	188
scf116.4	III	17.495	<nnxnp>,(nn,np),np,np,nn,nn,nn,nn,np,np,np,nn,nn,np,np,nn,np,nn,np,np,np,np,nn,nn,np,nn,nn,nn,nn,nn,nn,nn	TGCAGGAATTGCCTGGCTGATATGTGAATATCAGCTATGAATTTATTTTGTACGTTCTTTTCTTTTTTAAAATGCTCCTACTTTCCTGGAATAGT	scaffold_116	100	95	0	0	1	95		368272	368178	1e-46	188
scf3600	III	17.495	<lmxll>,(ll,lm),--,ll,lm,ll,ll,ll,ll,--,ll,ll,ll,ll,ll,lm,--,ll,--,ll,ll,ll,ll,lm,--,LM,ll,--,lm,ll,ll,lm	TGCAGGCACAGAGGCCCACGGCGGCGGCTGCAAGCCACTGCGCCGCAGCCAGAAAGTGAGCGCACGGGCATGAACGGAAGCGCTAGTCAGCTGTC	scaffold_3600	100	95	0	0	1	95		196740	196834	1e-46	188
4022	III	20.944	<efxeg>,(ee,ef,eg,fg),ee,ef,eg,fg,fg,fg,ef,ee,ef,ef,fg,ef,ef,eg,ee,fg,--,ef,ef,ef,fg,eg,ee,eg,--,eg,eg,fg,eg,eg	TGCAGGGACCTGTAACTAGAAATTTAGTCGTTTTAATTGTTGCTCGTGTGAGACTGAAACCGGCGAATCCCAAAGAGACACACACACACGAGGGG
scf2694	III	21.481	<lmxll>,(ll,lm),ll,lm,--,lm,lm,lm,LM,ll,lm,lm,LM,lm,lm,ll,ll,lm,lm,lm,LM,lm,lm,ll,ll,ll,lm,ll,ll,lm,ll,ll	TGCAGGGACCTGTTTTTGTACGAGTGGTATTTAGAGAGAGAAGTGATCACATTTTGTCCGGGGAAATGTTTGCATCGGCCGAGTGGTCCGCGGGC	scaffold_2694	100	95	0	0	1	95		36077	36171	1e-46	188
scf5049.1	III	21.481	<lmxll>,(ll,lm),ll,lm,ll,lm,lm,lm,LM,ll,lm,lm,lm,lm,lm,ll,ll,lm,lm,lm,lm,lm,lm,ll,ll,ll,lm,ll,ll,lm,ll,ll	TGCAGGACAATGCATATATTATCAAAGTATGTTTGCATTTTGGTCAGGTGACGGAAGAGGACAGTGGAGTCTGCCGGTGGAGCGAGCGTCTAGAA	scaffold_5049	98.95	95	1	0	1	95		19975	19881	2e-44	180
scf24766	III	22.017	<efxeg>,(ee,ef,eg,fg),--,fg,ee,ef,--,ef,fg,eg,fg,fg,ef,fg,fg,ee,--,ef,fg,fg,fg,fg,ef,ee,eg,ee,ef,ee,ee,ef,ee,ee	TGCAGGCTGCATGCGTCCCTCGGAGTCTCTTGTGGTGGCCTGGTCTTAAGTGTGTCTCGAGCAGGGGTCTGCAACCAAAATAACAAGAAGAGCCT	scaffold_24766	98.95	95	1	0	1	95		31118	31212	2e-44	180
scf1666	III	22.641	<hkxhk>,(hh,hk,kk),hk,hh,kk,hk,hh,hk,hh,hk,hh,hh,hk,hh,hh,kk,hk,hk,hh,hh,hh,hh,hk,kk,hk,kk,hk,kk,kk,hk,kk,kk	TGCAGGGCACAACATTGTACAACACGGAAGGATGAGTGATGGGTGCAATACCATTTTGGAAATTGCGTTGAACTTTAATTAGCTATACAGTAAGT	scaffold_1666	100	95	0	0	1	95		47680	47586	1e-46	188
scf1901	III	24.366	<nnxnp>,(nn,np),np,nn,nn,nn,np,nn,np,np,np,np,nn,np,np,nn,np,nn,np,np,np,np,nn,nn,np,nn,nn,nn,nn,nn,nn,nn	TGCAGGCTCAGCGATTTTTACTTATTTTTGAACTTAAAAGTGAATTCGATTAACAGTTATTTCGGTTCACGGTAGTTTTCCCGGAGCGGATTAAG	scaffold_1901	100	95	0	0	1	95		24760	24854	1e-46	188
scf7995	III	24.366	<hkxhk>,(hh,hk,kk),hk,hk,kk,hk,hh,hk,hh,hk,hh,hh,hk,hh,hh,kk,hk,hk,hh,hh,hh,hh,hk,kk,hk,kk,hk,kk,kk,hk,kk,kk	TGCAGGGACCTGTTACGTTCTCACGGCAGCTTGTCATCCGAGTGCGGTTTTCGGGGGGTTTGGGCTGCTTGCCTCTTCACGAGTTGAAGGAGGAG	scaffold_7995	96.84	95	3	0	1	95		155399	155493	1e-39	165
scf548	III	34.503	<hkxhk>,(hh,hk,kk),hk,hk,hh,hk,kk,hk,kk,hk,hk,kk,hk,kk,hk,hh,hk,hk,kk,kk,HK,kk,kk,hh,hh,hh,hk,hh,hh,hk,hh,hh	TGCAGGAAGTCAAGGACTCGGTGGGAGACTGGGTTTGGGACAAAAGGATGTTGGGAGTTCACGACATGAAGGTACATTCAATCTTCATACACTGT	scaffold_548	98.95	95	1	0	1	95		32934	33028	2e-44	180
scf2023	III	36.228	<lmxll>,(ll,lm),ll,lm,ll,lm,lm,lm,lm,ll,lm,lm,lm,lm,lm,ll,ll,lm,lm,lm,lm,lm,LM,ll,ll,ll,lm,ll,ll,lm,ll,ll	TGCAGGGCTCTTCTATATTACCCAAGCCTGAAACGAGTACCCTAACTGTGTAAATGACAGCACAATGTGGAGAGAAAGCCACAGCTGGCAAGATG	scaffold_2023	97.83	92	2	0	1	92		18105	18014	4e-40	167
scf2694.1	III	36.228	<lmxll>,(ll,lm),ll,lm,ll,lm,lm,lm,lm,ll,lm,lm,lm,lm,lm,ll,ll,lm,lm,lm,lm,lm,lm,ll,ll,ll,lm,ll,ll,lm,ll,ll	TGCAGGGCAGCACAAGGTGGCAGCCTGCAGCATTTTGCAGCAGCCAGATATCCGGTTATCCCGATTACCGACTTTCCCAATGTGGCTCCACCCCT	scaffold_2694	97.89	95	2	0	1	95		30621	30715	6e-42	172
scf349	III	36.228	<hkxhk>,(hh,hk,kk),hk,hk,hh,hk,kk,hk,kk,hk,hk,--,kk,kk,hk,hh,hk,hk,kk,kk,hk,kk,kk,hh,hh,hh,HK,hh,hh,hk,hh,hh	TGCAGGCAACCTGAAAATGGCTGGATATTTTCAATGTGCGGTGTTCACCAAATTTTCTGAATCGAAATAGATTTCTCGGAATGTGTTCAGGACCT	scaffold_349	100	95	0	0	1	95		2152	2058	1e-46	188
scf548.1	III	36.228	<nnxnp>,(nn,np),np,nn,nn,nn,np,nn,np,np,nn,np,np,np,nn,nn,np,nn,np,np,nn,np,np,nn,nn,nn,nn,nn,nn,nn,nn,nn	TGCAGGTAAGAGGGTGGCGCCGGCACAACACGTGGATGGGGCATTGCCACCACGTGGCCACTCACTGACCGGCCACGACCAGTTTCTCAGTTTTT	scaffold_548	100	95	0	0	1	95		227436	227342	1e-46	188
scf5533	III	36.228	<nnxnp>,(nn,np),np,nn,nn,nn,np,nn,np,np,nn,np,np,np,--,nn,np,nn,np,np,nn,np,np,nn,nn,nn,nn,nn,nn,nn,nn,nn	TGCAGGCCTTAATCGTTGCTCTCTGAGAGAAGTTTCCCCAAAAGTCTATATAGGCTATTCATGGGATCTCTTGTCTTTACATTGTATATTGCTAG	scaffold_5533	100	95	0	0	1	95		3503	3597	1e-46	188
scf49.1	III	40.604	<nnxnp>,(nn,np),NP,nn,nn,nn,np,np,np,np,nn,np,np,np,nn,nn,np,nn,np,np,nn,np,np,nn,nn,nn,nn,nn,nn,nn,nn,nn	TGCAGGACATCCATTTATCGCCCTCGTATTCTCAGCTTGCGTCCAATCAAATATAATACTTATTTTCAGAAATGCTTCCAGTTGACATTTATGGT	scaffold_49	98.95	95	1	0	1	95		707252	707346	2e-44	180
scf1155	III	42.133	<lmxll>,(ll,lm),LM,lm,lm,lm,lm,lm,lm,ll,lm,lm,lm,lm,lm,ll,ll,lm,LM,lm,lm,lm,lm,ll,ll,ll,lm,ll,ll,lm,ll,ll	TGCAGGGGTTTTAAGAGGCACTTCATAATATTCTCGCAAGTGTATGCTTACAGTAAGTTTTGGCTACGTGTGACATGTTGCCATATTGCCATGCT	scaffold_1155	100	95	0	0	1	95		48155	48249	1e-46	188
scf1922	III	44.98	<hkxhk>,(hh,hk,kk),hk,hk,hk,hk,kk,kk,kk,HK,hk,kk,kk,kk,hk,hh,hk,hk,hk,kk,hk,kk,kk,hh,hh,hh,hk,hh,hh,hk,hh,hh	TGCAGGACCAACAAAGTCCACGCGAATTTCCAAACCGTCAAGTGCTCTGCTTAAGCATTAAAGCAGTGGATTACTCCAATTGCAGGAACGCTCCT	scaffold_1922	98.95	95	1	0	1	95		7060	7154	2e-44	180
scf387.2	III	44.98	<nnxnp>,(nn,np),np,nn,nn,nn,np,np,np,np,nn,np,np,np,nn,nn,np,nn,nn,np,nn,np,np,nn,nn,nn,nn,nn,nn,nn,nn,nn	TGCAGGAGGACAGCCACGTTGGTGGCCATTCAGCTAACTTGGATCTTCACCCTCCTCCCAACCGTGAAAGATTGTCAAGTTTATATCGCGGAATT	scaffold_387	97.89	95	2	0	1	95		32923	33017	6e-42	172
scf1922.1	III	49.277	<nnxnp>,(nn,np),np,nn,nn,nn,nn,np,np,np,nn,np,np,np,nn,nn,np,nn,nn,np,nn,nn,np,nn,nn,nn,nn,nn,nn,nn,nn,nn	TGCAGGCGGGTGTTCCAAACGCATGATCTCAGAGCGATCCGCCAGCCCCACCGTTAAAGAATTGACTACAGCGGGCGCATTGCTCGAACTGGCCC	scaffold_1922	98.95	95	1	0	1	95		25145	25239	2e-44	180
scf2440.1	III	53.575	<nnxnp>,(nn,np),np,--,nn,nn,np,np,np,np,nn,np,np,np,nn,nn,np,nn,nn,np,nn,np,np,nn,nn,nn,nn,nn,nn,nn,nn,nn	TGCAGGTCCCTGGCAGGGGCCGCCGTCCTCCGTCTGCGTGCGCACGTCTGCTTGCGTTCCGACGCCGCGGGGATTCCCAACCTCTCTGCGACCGC	scaffold_2440	100	95	0	0	1	95		18736	18830	1e-46	188
scf387	III	55.274	<hkxhk>,(hh,hk,kk),hk,kk,hk,hk,hh,hh,hh,hk,hk,hh,--,hh,hk,kk,hk,hk,hk,hh,hk,hh,hh,kk,kk,kk,hk,kk,kk,hk,kk,kk	TGCAGGAGGCCTCGGCCGACACCAACGTGTCCAGGCGACAGTGCCGCATACGTGGCCACCGTCTTGAAAGTCGCGATCTTACATTTCTTTACTGC	scaffold_387	98.95	95	1	0	1	95		32926	32832	2e-44	180
scf387.1	III	55.274	<lmxll>,(ll,lm),ll,ll,lm,lm,LM,lm,LM,ll,lm,lm,--,lm,lm,ll,ll,lm,lm,lm,lm,--,--,ll,ll,ll,lm,ll,ll,lm,ll,ll	TGCAGGCACGAAAGCTTTAAGTCAGGAAATACATTTCCAATAAATATTAACATTGTTCTTCGCTTAACACAGTTCGGAAATGCAAATATAACAAC	scaffold_387	98.95	95	1	0	1	95		46244	46150	2e-44	180
scf615.2	III	56.087	<nnxnp>,(nn,np),NP,nn,nn,nn,np,np,np,np,nn,np,nn,np,nn,nn,np,nn,nn,np,nn,np,NP,nn,nn,nn,nn,nn,nn,nn,nn,nn	TGCAGGTAGAGTGTTGAGTGAATAAGTGCATTCACAACGGATCAGTGATTATTTTAATCACAGTAGAAATGCCGACATATCCGCAAAGTAATAAA	scaffold_615	100	95	0	0	1	95		1115	1021	1e-46	188
scf615	III	60.869	<efxeg>,(ee,ef,eg,fg),--,ee,fg,ef,fg,fg,--,eg,EF,fg,ef,--,ef,ee,eg,ef,--,fg,ef,fg,fg,ee,ee,ef,ef,ee,ee,ee,ee,ee	TGCAGGCGCACAGGTGACATTTTCATTGTCGCTGTTTCATAAACGGGCTGTGTTGTACACATGGCCATATACACTGGGCCATGTGGGCACAAGTC	scaffold_615	98.95	95	1	0	1	95		71662	71756	2e-44	180
scf615.1	III	60.869	<lmxll>,(ll,lm),ll,ll,lm,lm,lm,lm,lm,ll,lm,lm,lm,lm,lm,ll,ll,lm,lm,lm,lm,lm,lm,ll,ll,lm,lm,ll,ll,ll,ll,ll	TGCAGGTTCAGTTTGTTCCAGTCCAATCAAATTGTGGTTACATTTCAATTTGAAGTGTACAAGGGTGGCCTATATCAATATTGGTCAATTGGTAA	scaffold_615	100	95	0	0	1	95		90127	90221	1e-46	188
scf1489	III	62.658	<nnxnp>,(nn,np),np,nn,np,nn,np,np,np,np,nn,np,nn,np,nn,nn,np,nn,nn,np,nn,np,np,nn,nn,nn,nn,nn,nn,nn,nn,nn	TGCAGGGGAGCGTGCGTGCACGCCTCTGCTTTCGCTTTTGTGGTGGTGTACGTGGGCGTGTGCGGGATAACCCCGGGTGGTGGTGAGCCAGCCGA	scaffold_1489	97.89	95	2	0	1	95		48605	48699	6e-42	172
4108	III	64.447	<efxeg>,(ee,ef,eg,fg),eg,ee,fg,ef,fg,fg,fg,eg,ef,fg,ef,fg,ef,ee,eg,ef,ef,fg,ef,fg,fg,ef,ee,ef,ef,ee,ef,ee,ee,ee	TGCAGGGCTTTGAGGTGAGTGGGAGATGGCAGTGCAGCAATGGGTTCATGAACCTATCTGTTCAGATTTCAAGTGCTATTTCCTCATATACGTGT
scf100.1	III	64.447	<nnxnp>,(nn,np),nn,np,nn,np,nn,nn,nn,nn,np,nn,np,nn,np,np,nn,np,np,nn,np,nn,nn,np,np,np,np,np,np,np,np,np	TGCAGGTGATGGACGGCAGCGAGGTCCATCTCACTGTCAAAGTTGCAGGTACAATTCCAAAGCCTCGTTCACCACGACACAAACAACAACAAAGA	scaffold_100	100	95	0	0	1	95		218281	218187	1e-46	188
scf1389	III	64.447	<lmxll>,(ll,lm),ll,ll,lm,lm,lm,lm,lm,ll,lm,lm,lm,lm,lm,ll,ll,lm,lm,lm,lm,lm,lm,lm,ll,lm,lm,ll,lm,ll,ll,ll	TGCAGGGTATATGGAGGTGCGGGCTTCCCAAATTTTTTTTACACGTGTGACATGTCATAACTCGTTTAATATTTTCATTGTAGGACTATCCATTA	scaffold_1389	100	95	0	0	1	95		62428	62334	2e-32	141
scf1389.1	III	64.447	<nnxnp>,(nn,np),np,nn,np,nn,np,np,np,np,nn,np,nn,np,nn,nn,np,nn,nn,np,nn,np,np,nn,nn,nn,nn,nn,nn,nn,nn,nn	TGCAGGATTTAAATACAATTTCACGCATGCAGGTTTATAAAACCACAATTTTAATATAATTTACATATTTGCCAACAACATGCATTTTTACTTAA	scaffold_1389	98.95	95	1	0	1	95		84813	84907	2e-44	180
scf30	III	64.447	<hkxhk>,(hh,hk,kk),kk,hk,hk,hh,hk,hk,hk,--,hh,hk,hh,hk,hh,hk,kk,hh,hh,hk,hh,hk,hk,hh,hk,hh,hh,hk,hh,hk,hk,hk	TGCAGGTACAAGTGGCGCAACATTCACCACAATGTTTTTACTAAAAATAATGCCCTGATTTGAATTGTGACCCCCAAATCGTGACAATTATCGCG	scaffold_30	100	95	0	0	1	95		292446	292540	1e-46	188
scf30.1	III	64.447	<lmxll>,(ll,lm),LM,lm,ll,ll,ll,ll,ll,lm,ll,ll,ll,ll,ll,lm,lm,ll,ll,ll,ll,ll,ll,ll,lm,ll,ll,lm,ll,lm,lm,lm	TGCAGGATGATATGCAGTGTTTAAACACTGCAATGATCTCCCCTTCTACGGCACGCCGTCCAGTGTGGGATATCGAGGGCTACGAGCTACAGTGT	scaffold_30	98.95	95	1	0	1	95		394115	394209	2e-44	180
scf30.2	III	64.447	<lmxll>,(ll,lm),lm,lm,ll,ll,ll,ll,ll,lm,ll,ll,ll,ll,ll,lm,lm,ll,ll,ll,ll,ll,ll,ll,lm,ll,ll,lm,ll,lm,lm,lm	TGCAGGGACCTTTTAACAGTGATCTGCCACGGCCGAGGTGTTGGTCCTACCGTGTTTCAGGTCTGCTTTGTGTTCACGAATGCGGTCCGAGACAT	scaffold_30	100	95	0	0	1	95		793338	793432	1e-46	188
scf3342	III	64.447	<lmxll>,(ll,lm),ll,ll,lm,lm,lm,lm,lm,ll,lm,lm,lm,lm,LM,ll,ll,lm,lm,lm,lm,lm,lm,lm,ll,lm,lm,ll,lm,ll,ll,ll	TGCAGGGGGTAATGATCCTCACAATACAAAAAAATGTGGAATTTCTACCGCCGGTTCAGGGACGTTAACAGAGATGCCCACTACTATCCCAATGC	scaffold_3342	98.95	95	1	0	1	95		18177	18083	8e-32	139
scf3506.2	III	64.447	<lmxll>,(ll,lm),ll,ll,lm,lm,lm,lm,lm,ll,lm,lm,lm,lm,lm,ll,ll,lm,lm,lm,lm,lm,lm,lm,ll,LM,LM,ll,lm,ll,ll,ll	TGCAGGTCTACGAGATGGCTCTATGGATTTTTGAGTGCATACTTTTTTTTCTACGTACACCAAATTTCCTCACATCCAGAATACTCAATAAGAAA	scaffold_3506	98.95	95	1	0	1	95		3366	3460	5e-30	133
scf4929	III	64.447	<nnxnp>,(nn,np),nn,np,nn,np,nn,nn,nn,nn,np,nn,np,nn,np,np,nn,np,np,nn,np,nn,nn,np,np,np,np,np,np,np,np,np	TGCAGGAACCGAGGAGAGTGATTTCCATGCACAAGTGCTGGAGGATCTGCGGCATCGCAAGGACTCCTTCAAAGGAAAAAGCTAGCTGCCACCAC	scaffold_4929	100	95	0	0	1	95		15285	15191	1e-46	188
scf501.1	III	64.447	<hkxhk>,(hh,hk,kk),hk,kk,hh,hk,hh,hh,hh,hk,hk,hh,hk,hh,hk,kk,hk,hk,hk,hh,hk,hh,hh,hk,kk,hk,hk,kk,HK,kk,kk,kk	TGCAGGGCAGTCATATGACTGCATTAAACGCTATCTATACACAACAAGGAAGCAAGCATTTGAGCTTCCGAAATTGTGCGTCGCAGTCATCGCCC	scaffold_501	100	95	0	0	1	95		87222	87316	1e-46	188
scf501.2	III	64.447	<lmxll>,(ll,lm),ll,ll,lm,lm,lm,LM,lm,ll,lm,lm,lm,lm,lm,ll,ll,lm,lm,lm,lm,lm,lm,lm,ll,lm,lm,ll,lm,ll,ll,ll	TGCAGGACAATGCCACGGCTAAGGACATATGGACCTTATGGTGGGACCCTGGGGTCCCATAAGCCCCCGGCTCTCGCATAAACTGCGTTGCGACG	scaffold_501	100	95	0	0	1	95		121587	121493	1e-46	188
scf615.4	III	64.447	<nnxnp>,(nn,np),np,nn,np,nn,np,np,np,np,nn,np,nn,np,nn,nn,np,nn,nn,np,nn,np,np,nn,nn,nn,nn,nn,nn,nn,nn,nn	TGCAGGAAAAACTAAGGGATCCCACTACAGTAATGGATTTTCATACGAAAAAGACATGTACATATAATCTGAATATACTAATAGTTTAGAATTGC	scaffold_615	98.95	95	1	0	1	95		72630	72724	2e-44	180
scf795	III	64.447	<efxeg>,(ee,ef,eg,fg),ee,eg,ef,fg,ef,ef,ef,ee,fg,ef,fg,ef,fg,eg,ee,fg,fg,ef,fg,ef,ef,--,eg,fg,fg,eg,fg,eg,eg,eg	TGCAGGGTAGCGTGCATCAGCACAGATGTGAGACTCGCCCAAAACCAAATTAATAGCCAGGCGGTGGTGGTGCACGCCTGTAATCCAGCACTGGA	scaffold_795	97.89	95	2	0	1	95		38071	37977	6e-42	172
scf795.1	III	64.447	<lmxll>,(ll,lm),lm,lm,ll,ll,ll,ll,ll,lm,ll,ll,ll,ll,ll,lm,lm,ll,ll,ll,ll,ll,ll,ll,lm,ll,ll,lm,ll,lm,lm,lm	TGCAGGGAGCACGTTGCATTATCATCACTACTTAATATGTATACCGCACCGCTCATGCAACACATGCCCTTTGGCAGGAGACCACTTGAGGCAGC	scaffold_795	98.95	95	1	0	1	95		88558	88652	2e-44	180
scf795.2	III	64.447	<nnxnp>,(nn,np),np,nn,np,nn,np,np,np,np,nn,np,nn,np,nn,nn,np,nn,nn,np,nn,np,np,nn,nn,nn,nn,nn,nn,nn,nn,nn	TGCAGGACATGCACAACATCATCGCCATGGTTTTTCGCAGTGCACAATCCATGATGCATCACGTCTCAAAGTGTTGTTATTATTTTTATAACGCT	scaffold_795	100	95	0	0	1	95		64132	64038	1e-46	188
scf902	III	64.447	<hkxhk>,(hh,hk,kk),hk,kk,hh,hk,hh,hh,hh,hk,hk,hh,hk,hh,hk,kk,hk,hk,hk,hh,hk,hh,hh,hk,kk,hk,hk,kk,hk,kk,kk,kk	TGCAGGCGTATTGAAAAAGTTCTCTCAGCCTACTTAAAATCCTCGACAGCATCTTAGCGACATCACGGAGCTCGCATAAAAACACAGACATTCAA	scaffold_902	100	95	0	0	1	95		85460	85554	1e-46	188
scf100	III	66.172	<hkxhk>,(hh,hk,kk),hk,kk,hh,kk,hh,hh,hh,hk,hk,hh,hk,hh,hk,kk,hk,hk,hk,hh,hk,hh,hh,hk,kk,hk,hk,kk,hk,kk,kk,kk	TGCAGGACGTGCGGGAGCTGCAGCGCGGCATGGACCTGACCAAGCGCGAGTTCAGCATGCACGAGAGCAACACCCTTCTGCGTGAGTTCCTGGCG	scaffold_100	100	95	0	0	1	95		89776	89682	1e-46	188
scf191.1	III	67.897	<nnxnp>,(nn,np),nn,np,nn,np,nn,nn,nn,nn,np,nn,np,--,np,np,nn,np,np,nn,np,nn,nn,np,np,np,np,np,np,np,np,np	TGCAGGAATGCCTGTTGTGTGGTATTAATACTTGAATGTTTTTTTTTATTATTATTCTTGGGTGAGATAGAATAGTAAGCAGGTTAACAGTTCCT	scaffold_191	97.89	95	1	1	1	95		66759	66852	3e-25	117
scf3506.1	III	67.897	<hkxhk>,(hh,hk,kk),hk,hh,kk,hk,kk,kk,kk,hk,hk,kk,hk,kk,hk,hh,hk,hk,hk,kk,hk,kk,kk,hk,hh,hk,hk,hh,hk,hh,--,hh	TGCAGGTGAGGATCTTGCACATCAATCTGCGTATGCTGCTGAGCTTCAAAAACTGGACATGAGGCACATTGAGCCTGCTGACATCGTCATGGGCA	scaffold_3506	96.84	95	3	0	1	95		16264	16170	1e-39	165
scf501	III	67.897	<hkxhk>,(hh,hk,kk),HK,kk,hh,hk,hh,hh,hh,hk,hk,hh,hk,hh,hk,kk,hk,HK,hk,--,hk,hh,hh,hk,kk,hk,hk,kk,hk,kk,kk,kk	TGCAGGGCAGTGGCTGGGCGTGGTGCTCACGTCAGTTGTGAGGCCGGACTAAAAAAAAAGAGCCCCTGGTGAATGCTGCCATCAGAGATGCTCAG	scaffold_501	100	95	0	0	1	95		87225	87131	1e-30	135
scf615.3	III	67.897	<nnxnp>,(nn,np),np,nn,np,nn,np,np,np,np,nn,np,nn,np,nn,nn,np,nn,nn,np,nn,np,np,nn,nn,nn,nn,nn,nn,nn,nn,nn	TGCAGGAAGTTGGACACTGCAATCCTGTGCAGTACACCGAGGGCTACGCCTACTGAGACTGGCCTTGTGCCACAGAGCTGCCCACCGTCTGGCAG	scaffold_615	100	95	0	0	1	95		62126	62032	1e-46	188
scf7224	III	68.692	<nnxnp>,(nn,np),np,nn,np,nn,np,np,np,np,nn,NP,nn,np,nn,nn,--,nn,nn,np,nn,np,np,nn,nn,nn,nn,nn,nn,nn,nn,nn	TGCAGGGATCCCTTGCCAAAATGACTTAGAAGTGGAGATAAAAGCTAAGCATTTATTGACGGCATGTAAAGACGAGGACAGGAACAACCATTACA	scaffold_7224	100	95	0	0	1	95		11453	11547	1e-46	188
11861	III	69.592	<efxeg>,(ee,ef,eg,fg),eg,ee,--,ef,fg,--,fg,eg,ef,fg,ef,fg,ef,ee,ee,ef,ef,--,ef,fg,fg,ef,ee,ef,ef,ee,ef,ee,ee,--	TGCAGGCACACGTGAGGCAGACTGCTGAGGCGCGTTCACATGCGACCGTACCACAGGTTCGGACACATCCAACACAGGCCGCTCTGGGATGGGAG
scf191	III	69.592	<lmxll>,(ll,lm),ll,ll,lm,lm,lm,lm,lm,ll,lm,LM,lm,lm,lm,ll,ll,lm,lm,lm,lm,lm,lm,lm,ll,lm,lm,ll,lm,ll,ll,ll	TGCAGGAAGGGATCACAGCTCTCTATATTACATGCATGCATTGTGTAGACCAGAACTAACCTGTCTTTGCAGCCGATTTTACTCTCCATTTTCCC	scaffold_191	98.95	95	1	0	1	95		288400	288494	2e-44	180
scf30.3	III	69.592	<lmxll>,(ll,lm),lm,lm,ll,ll,ll,ll,ll,lm,ll,ll,ll,ll,ll,lm,lm,ll,ll,ll,ll,ll,ll,ll,lm,ll,ll,lm,ll,lm,lm,lm	TGCAGGTTGTTCATCTCACCGTCGTCGTCCGTGGCTGACAAGTTGTCGCCGCTGAAGGAGCTCAGCAGCAGCGCCAGGAAGAGGTTGAGCACCTG	scaffold_30	100	95	0	0	1	95		389161	389067	1e-46	188
scf1496.1	III	71.049	<nnxnp>,(nn,np),np,nn,--,nn,np,np,np,--,nn,NP,nn,np,nn,nn,--,nn,nn,NP,nn,np,np,nn,nn,nn,nn,nn,nn,nn,nn,nn	TGCAGGTGAGGGCTTCTGAGCATGGTCTCAAGGCTTACAGGTGAACGCCTCGAGGCAAGGCCACGTGGTTGCCGGTGAAGACTTCAGGACGTGGG	scaffold_1496	100	95	0	0	1	95		9836	9742	1e-46	188
scf1496	III	72.142	<nnxnp>,(nn,np),nn,np,nn,np,nn,nn,nn,nn,np,nn,np,nn,NP,np,nn,np,np,nn,np,nn,nn,np,np,np,np,np,np,np,np,np	TGCAGGTCCTCTGTTCACCTCACTGCCTTCATCAAGTTAAAGTTATTCCCTGCTTAAATGAACATTGAGGTGATGCTCTATCATCTAATGCTTAC	scaffold_1496	96.84	95	3	0	1	95		2150	2056	1e-39	165
scf1337	III	74.737	<efxeg>,(ee,ef,eg,fg),ef,eg,ef,fg,ef,ef,ef,ee,fg,ef,fg,ef,fg,eg,ee,fg,fg,ef,fg,ef,ef,fg,eg,fg,fg,eg,fg,ee,eg,eg	TGCAGGTGCGCGCGCGTCAGCATTAGTTGTGGTGTACGCGGGCGTGTGTGGAATAACCCCGTGCGGCGGTGATCGAGCAGTTTAGCCATGTTCTT	scaffold_1337	96.84	95	3	0	1	95		2898	2992	1e-39	165
scf30.4	III	74.737	<nnxnp>,(nn,np),nn,--,nn,np,nn,nn,nn,nn,np,nn,np,nn,np,--,nn,np,np,nn,np,nn,nn,np,--,np,np,--,np,--,--,--	TGCAGGGTTGATGGAGGATAGCGGGGGGGGGCAGCACTCGCTGTCCTTCCTGGCCCCCTGGCACTTAGCGATCCCAACAGTCTGTGTTGCAACGG	scaffold_30	98.95	95	1	0	1	95		343853	343759	3e-28	127
scf493	III	74.737	<lmxll>,(ll,lm),lm,--,lm,lm,lm,lm,lm,ll,lm,lm,LM,LM,lm,ll,ll,lm,lm,lm,lm,lm,lm,lm,ll,lm,lm,ll,lm,ll,ll,ll	TGCAGGTCAAAACCTGTATAGTGTTTGTTTGCTTCTACAAACGTTTCTGGAAAATATTGGTCCAGAATTCCAAAAGACCGGTGGACTACAATGTT	scaffold_493	100	95	0	0	1	95		126768	126862	1e-46	188
scf493.1	III	74.737	<lmxll>,(ll,lm),lm,ll,lm,lm,lm,lm,lm,ll,lm,lm,lm,lm,lm,ll,ll,lm,lm,lm,lm,lm,lm,lm,ll,lm,lm,ll,lm,ll,ll,ll	TGCAGGATCTCATCAGCTGAGTCGAACTGGTTTAACAAAAATTGAATTTGGCTAGATGTTATGGAAAACTGCTCTCCACCAACAGGGGGATTAGT	scaffold_493	97.89	95	2	0	1	95		126771	126677	6e-42	172
scf3506	III	78.315	<hkxhk>,(hh,hk,kk),hk,hh,kk,hk,kk,kk,kk,hk,hk,kk,hk,kk,hk,hh,hk,hk,hk,kk,hk,kk,kk,hk,hh,hk,hk,hh,hk,hh,hh,hh	TGCAGGAGCCCAGCGTGCTCCCTGTGTGTGCAAGTAGGTTTCGTACAGACTGTGTGAAAAGTTTGAGTGTGATCATTTCCTTAGTGTTGATTTCC	scaffold_3506	95.79	95	4	0	1	95		16261	16355	3e-37	157
scf622.4	III	78.315	<nnxnp>,(nn,np),nn,nn,np,nn,np,np,np,np,nn,np,nn,np,nn,nn,np,nn,nn,np,nn,np,np,nn,nn,nn,nn,nn,nn,nn,nn,nn	TGCAGGCTACAGCAGGTGCAAACAGTTCCCCCTATTACTGAAACCGATCTTACTTAACTTACATACTGTGTTTGGTCCCTGCAGCATCAATAATT	scaffold_622	100	95	0	0	1	95		696006	695912	1e-46	188
scf622	III	80.039	<hkxhk>,(hh,hk,kk),kk,hk,hk,kk,hh,HK,hk,hh,kk,hk,kk,hk,kk,hk,hh,kk,kk,hk,kk,hk,hk,kk,hk,kk,kk,hk,kk,hk,hk,hk	TGCAGGAATTACTTTTTGGTACTTTCGGTAAAGTCACGTAGAAAGAAAACACATTTAATAAGTCTCTGTGATGTCTCTCTGCTTGTGTGTTTGTC	scaffold_622	98.95	95	1	0	1	95		587820	587726	2e-44	180
scf622.1	III	80.039	<hkxhk>,(hh,hk,kk),hh,hk,hk,hh,kk,hk,hk,kk,hh,hk,hh,hk,hh,hk,kk,hh,hh,hk,hh,hk,hk,hh,hk,hh,hh,hk,hh,HK,hk,hk	TGCAGGCACGAAAGCTTCAAATCCAGTTTGGCTTGTATAATATTAAGTGTTCACCATGCACAATTTCGGACTTTATGCATTGACATGTGTGCAAT	scaffold_622	98.95	95	1	0	1	95		587817	587911	2e-44	180
scf306.1	III	87.252	<hkxhk>,(hh,hk,kk),--,hk,--,hh,--,hk,hk,kk,hh,hh,hh,kk,--,hk,kk,hh,hk,hk,hh,hk,hk,hh,hk,hh,hh,hh,hh,hk,hk,hk	TGCAGGGCTTCGTCTCAGTCCCCTCTGCTCATTGTTCCCCATGCTCGATGTGACTCAGACTACAAGCGAACGAGCATGGCGGCGAGCGTGCGCGT	scaffold_306	98.95	95	1	0	1	95		687924	688018	2e-44	180
scf299.1	III	92.024	<lmxll>,(ll,lm),ll,lm,ll,ll,lm,ll,ll,lm,ll,lm,ll,LM,ll,lm,lm,ll,ll,ll,ll,ll,ll,ll,lm,ll,ll,lm,ll,lm,lm,lm	TGCAGGCTTAGCATGATACAAATAATTACGTAATTTATATAAATGAGAAAGCACCACCGAGTCTCAAGACTATTTTTAAGACTGTCCTGCATTGA	scaffold_299	98.95	95	1	0	1	95		239274	239368	2e-44	180
scf306	III	94.3	<efxeg>,(ee,ef,eg,fg),ee,ef,eg,ee,fg,eg,eg,fg,ee,ef,ee,eg,ee,ef,fg,ee,eg,eg,ee,eg,ee,ee,ef,ee,ee,ef,ee,ef,ef,ef	TGCAGGCCCTGACTCAGCATGACGCCCTGTTGGCGTTGTGTGCATGTGGCACACTTGTGGCGCTGGAGTAATGTTTATCTTACATTTTTAACGTT	scaffold_306	100	95	0	0	1	95		687927	687833	1e-46	188
scf306.2	III	96.025	<hkxhk>,(hh,hk,kk),hh,hk,hk,hh,kk,hk,hk,kk,hh,hk,hh,hk,hh,hk,kk,hh,hk,hk,hh,hk,hk,hh,hk,hh,hh,hk,hh,hk,hk,hk	TGCAGGAAAGGAACGGCGAACCTCTGCAACAAGCGGCGAACGCAACACGGCTGGGTAATGTCACACTCAACCGCTGGGCCATGTACTGCCGTGAC	scaffold_306	98.95	95	1	0	1	95		548694	548600	2e-44	180
scf306.3	III	97.578	<lmxll>,(ll,lm),ll,lm,--,ll,LM,ll,ll,LM,ll,LM,ll,ll,ll,LM,--,ll,ll,ll,ll,ll,ll,ll,lm,ll,ll,LM,--,lm,lm,LM	TGCAGGGGTCGCACGGAAGAGTGCAGTGGGAAGGCGGGGGGGGCAGGCAGGCAGGCGTTCGCTAACCCGCACCTCCCCTACAAACCCACTCAGAA	scaffold_306	100	95	0	0	1	95		535330	535236	2e-32	141
scf378	III	99.445	<hkxhk>,(hh,hk,kk),kk,hk,hh,kk,hh,hk,hk,hh,kk,hh,kk,hk,kk,hk,hh,kk,hk,hk,kk,hk,hk,kk,hk,kk,kk,hk,kk,hk,hk,hk	TGCAGGTGACAGACTGTTGGGAAAAGTGTTGTTAGTGAGCACATATGAAGGCTTGTATAGCACGCGAGGGGGTGGTGTGGCCTGCTCCATGCCTG	scaffold_378	98.95	95	1	0	1	95		269099	269193	2e-44	180
scf1303	III	101.17	<efxeg>,(ee,ef,eg,fg),ee,ef,eg,ee,fg,eg,eg,fg,ee,fg,ee,eg,ee,ef,--,ee,eg,eg,ee,eg,eg,ee,ef,ee,ee,--,ee,ef,ef,ef	TGCAGGGCTTAATTTCAATTAAACATTCTTACTTTATGTTACAATTTTTCTTCAAATGTTATTGCTTTTTGTTGCTGTTAATTATTCTGCTAATT	scaffold_1303	100	95	0	0	1	95		12498	12404	1e-46	188
scf2361	III	101.17	<lmxll>,(ll,lm),ll,lm,ll,ll,lm,ll,ll,lm,ll,lm,ll,ll,ll,lm,lm,ll,ll,ll,ll,ll,ll,ll,lm,ll,ll,lm,ll,lm,lm,lm	TGCAGGAGGAGCTGAACAGTGTGAGCGTGGAGCGCATCGTCGTGAGTCCCAACGCGGCGTTCGACGAGTTCAAGGAAAAGCATGTCTCCTCGAAG	scaffold_2361	100	95	0	0	1	95		16901	16995	1e-46	188
scf588.3	III	101.17	<lmxll>,(ll,lm),ll,lm,ll,ll,lm,ll,ll,lm,ll,lm,ll,ll,ll,lm,lm,ll,ll,ll,ll,ll,ll,ll,lm,ll,ll,lm,ll,lm,lm,lm	TGCAGGGACCTGGTAGCTTTAGCAGCCAAGTGCTTGTACATTTTTTGATTTAAAGCTTTCGTGACTGCAGGGATTCATATTCTTGGTTCAACTCG	scaffold_588	98.95	95	1	0	1	95		7203	7297	2e-44	180
scf299.3	III	102.895	<nnxnp>,(nn,np),nn,nn,NP,nn,np,np,np,np,NP,np,nn,np,nn,nn,np,nn,np,np,nn,np,np,nn,nn,nn,nn,nn,nn,nn,nn,nn	TGCAGGGGTCGCATCACGCGCAACAATCGCTCCTCGACAGCATTGCCAAGCACCTGACAAACGTATGTGCATGCTTGCACACCCTAGGCATGTTA	scaffold_299	98.95	95	1	0	1	95		255858	255952	2e-44	180
scf12134	III	104.619	<efxeg>,(ee,ef,eg,fg),ee,ef,eg,ee,fg,eg,eg,fg,ee,fg,ee,eg,ee,ef,fg,ee,eg,eg,ee,eg,--,ee,ef,ee,--,ef,ee,ef,ef,ef	TGCAGGGCCTCTGGGACGCAACGGCGTGAGGGCTCCGGCGCCAGCTCGCACTCATTGCACACACAAAGTGCGTGCCGCAAGTGAACCGCAACACC	scaffold_12134	98.95	95	1	0	1	95		5107	5013	2e-44	180
scf299	III	104.619	<hkxhk>,(hh,hk,kk),kk,hk,hk,kk,hh,hk,hk,hh,kk,hh,kk,hk,kk,hk,hh,kk,hk,hk,kk,hk,hk,kk,hk,kk,kk,hk,kk,hk,hk,hk	TGCAGGGGGAGCGGACGAGCGCGGTCAAACATACACACGCACGCACGCACGTACTTACACCGAGAGAACCTGGCATCGGTCAGGAGACCTGAAGG	scaffold_299	96.84	95	3	0	1	95		197147	197241	1e-39	165
scf306.5	III	104.619	<nnxnp>,(nn,np),nn,nn,NP,nn,np,np,np,np,nn,np,nn,np,nn,nn,np,nn,np,np,nn,np,np,nn,nn,nn,nn,nn,nn,nn,nn,nn	TGCAGGTCGACTTGGCCATAAAGGAGTACCTTGTGTGGTGTGTGAACATCAGCACAGGGGAGACAATCAGCCTGGTGTGGTGTTAGCCACGCCAC	scaffold_306	100	95	0	0	1	95		46706	46800	1e-46	188
scf4040	III	104.619	<lmxll>,(ll,lm),ll,lm,ll,ll,lm,ll,ll,lm,ll,lm,ll,ll,ll,--,lm,ll,ll,ll,--,ll,ll,ll,lm,ll,ll,lm,ll,lm,lm,lm	TGCAGGAAATGCCTGAGCAAGGTCATGGTCTACAACCCCAAGAAGTTCGAGTGGAAGGAGCTGGCGCCCATGACCGTGGCGCGCTCGCTGTGCGG	scaffold_4040	98.95	95	1	0	1	95		5042	5136	2e-44	180
scf5220	III	104.619	<nnxnp>,(nn,np),nn,nn,np,nn,np,np,np,np,nn,np,nn,--,nn,nn,np,nn,np,np,nn,np,np,nn,nn,nn,nn,nn,nn,nn,nn,nn	TGCAGGGAGGTCAAACACAAAGCAAAGTAATTTAGTGCTCGTTCACAATTTCAAGTCTCAAGTTTATTTGAATTACCTCTTCATGTGTAATCATG	scaffold_5220	100	95	0	0	1	95		9103	9009	1e-46	188
scf424.5	III	106.344	<nnxnp>,(nn,np),nn,nn,np,nn,np,np,np,np,nn,np,nn,np,nn,nn,np,nn,nn,np,nn,np,np,nn,nn,nn,nn,nn,nn,nn,nn,nn	TGCAGGGTAGCCTCTGTGCCAATTCCAGATGTTAACGGGCAGTGTAAAATTGTTTTTAAAAGGCCTGCTTGTTTACAGCTCATGCAGTGTGTGTA	scaffold_424	98.95	95	1	0	1	95		20990	20896	2e-44	180
scf643	III	106.344	<hkxhk>,(hh,hk,kk),kk,hk,HK,kk,hh,hk,hk,hh,kk,hh,kk,hk,kk,hk,hh,kk,kk,hk,kk,hk,hk,kk,HK,kk,kk,hk,kk,hk,hk,hk	TGCAGGCGAATCGCATTCCACGTCCGCTGCGTATGATGCTCTTCATGGCTAATTAAACGTCTAGTAATCTCCATGTGCTGGCACGTGTAATTGGC	scaffold_643	98.95	95	1	0	1	95		41796	41702	2e-44	180
scf643.1	III	106.344	<nnxnp>,(nn,np),nn,nn,np,nn,np,np,np,np,nn,np,nn,np,nn,nn,np,nn,nn,np,nn,np,NP,nn,nn,nn,nn,nn,nn,nn,nn,nn	TGCAGGCGGATCCAAATGCGTTAAAATGCAGAGGAACCGGAAACGATTACAACCCATTTTTTTAACGTTCAATGCCCACACGTATATTTTTGAGT	scaffold_643	97.89	95	2	0	1	95		57572	57478	8e-32	139
scf6448	III	106.994	<efxeg>,(ee,ef,eg,fg),ee,ef,eg,ee,fg,eg,eg,fg,ee,fg,ee,--,ee,ef,fg,ee,ee,eg,ee,eg,eg,ee,ef,ee,--,ef,ee,ef,ef,ef	TGCAGGGCATGGAGTGGGGGAGAGAGAAAGCGACTTTTTAACGAGTTGGCAGAATCAGTGGGATGAGCAAGCTTCTCTTCGACGCTGCCAGAGTT	scaffold_6448	100	95	0	0	1	95		9060	8966	1e-46	188
scf622.3	III	108.041	<nnxnp>,(nn,np),nn,nn,np,nn,np,np,np,np,nn,np,nn,nn,nn,nn,np,nn,nn,np,nn,np,np,nn,nn,nn,nn,nn,nn,nn,nn,nn	TGCAGGGACCTGTTTATAAAGGTTTGAAATGGGTGTAGCCCAAATGTCAGCAGCATGGGCGGGGCAGCTAAAGTTAATGTAGTGGTGGACGGCGA	scaffold_622	100	95	0	0	1	95		485418	485512	1e-46	188
scf1303.1	III	108.38	<lmxll>,(ll,lm),ll,lm,ll,ll,lm,ll,ll,lm,ll,lm,ll,ll,ll,lm,lm,ll,ll,ll,ll,ll,ll,ll,lm,ll,ll,lm,ll,lm,lm,lm	TGCAGGGATCAGTTCTGGCACCAGCGCTGGTCAATCTCTATACTAGTGATATTCCAGCGACATCTTGCTATAAGTTCACATATGCGGATGATATC	scaffold_1303	98.95	95	1	0	1	95		55874	55968	2e-44	180
scf588	III	109.766	<efxeg>,(ee,ef,eg,fg),ee,--,eg,ee,fg,eg,eg,fg,ee,fg,ee,eg,ee,ef,fg,ee,ee,eg,ee,eg,eg,ee,ef,ee,ee,ef,ee,ef,ef,ef	TGCAGGGGTAGCCACACCTGCTCTGGGAGTAGTCATCAAAGATCGCCCTCTGTACCTGTACCAGGGGGTGCAACTGCTTCAGGGATGGAGAGGCT	scaffold_588	98.95	95	1	0	1	95		204292	204386	2e-44	180
scf588.2	III	109.766	<lmxll>,(ll,lm),ll,lm,ll,ll,--,ll,ll,lm,ll,lm,ll,ll,ll,lm,lm,ll,ll,ll,ll,ll,ll,ll,lm,ll,ll,lm,ll,lm,lm,lm	TGCAGGCTCCCAGCAGCGGCGTCCCAGCCCTGTTGGTACGTGCAAACCATATGTCGCCATGCTGCCACGGCCCATGCGCGCGGCGTTTCCTTGGA	scaffold_588	100	95	0	0	1	95		227326	227232	1e-46	188
scf424.4	III	109.934	<nnxnp>,(nn,np),nn,nn,np,nn,np,np,np,np,nn,np,nn,np,nn,nn,np,nn,nn,np,nn,np,np,nn,nn,nn,nn,nn,nn,nn,nn,nn	TGCAGGCGTCTCCGTCCTATGAGACCATGGCCCGTGGCATTGAGGCGAGTCTATGGGGCTCTTTGAGCCTATGGGTCTCTCTCTATATTAATTAT	scaffold_424	100	95	0	0	1	95		20987	21081	1e-46	188
scf5444	III	110.101	<efxeg>,(ee,ef,eg,fg),--,ef,eg,ee,fg,eg,eg,fg,ee,fg,ee,eg,ee,ef,fg,ee,--,eg,ee,eg,eg,ee,ef,ee,ee,ef,ee,ef,ef,--	TGCAGGTGGAACTTTTCTGTCAGTGTTGCGAGCAATTGCAGGGCTGCACCTTTACCTTTACCACCTTTCATTGCCACAAAGAGTAACAGCATCTT	scaffold_5444	98.95	95	1	0	1	95		5692	5786	2e-44	180
scf299.2	III	112.915	<lmxll>,(ll,lm),LM,lm,ll,ll,lm,ll,ll,lm,ll,lm,ll,ll,ll,lm,lm,ll,ll,ll,ll,ll,ll,ll,lm,ll,--,lm,ll,lm,lm,lm	TGCAGGGTGTGGAACTGGGGTACGGTAGTTAGCGCATGACACTTGGATCCCAGCAAACTGAGCTTGATTCCTGGGCACAGCTAAATTCAGTGGCG	scaffold_299	100	93	0	0	1	93		239277	239185	2e-45	184
scf22.2	III	120.551	<lmxll>,(ll,lm),ll,lm,ll,ll,lm,ll,ll,lm,ll,lm,ll,ll,ll,lm,lm,ll,ll,ll,ll,lm,ll,ll,lm,ll,lm,lm,ll,lm,lm,lm	TGCAGGGCATACTACTTAGTTAAAGTCTACAAGACACGATGGAATACAATTCTTTTTATCACTGAGCATTTCTCTTGAACACATCCTGAAATTCC	scaffold_22	100	95	0	0	1	95		265984	266078	1e-46	188
scf22.3	III	120.551	<lmxll>,(ll,lm),--,--,ll,ll,lm,ll,ll,lm,ll,lm,ll,ll,ll,lm,lm,ll,ll,ll,ll,lm,ll,ll,lm,ll,lm,lm,ll,lm,lm,lm	TGCAGGTCATGGCCTGTCAATTGAAACCTAACTTTACCATCTGTCCTTCATAACTAACAGATGGTAGGCTATTGCACTATACAGTTGCTGTTAAA	scaffold_22	100	95	0	0	1	95		12427	12333	1e-46	188
scf22.5	III	120.551	<lmxll>,(ll,lm),ll,lm,ll,ll,lm,ll,ll,--,ll,LM,ll,ll,ll,lm,lm,ll,ll,ll,ll,lm,ll,ll,lm,ll,lm,LM,ll,lm,lm,lm	TGCAGGCAGGAATACACAATTTGACATCCAGTTACAACATGTTAACCGTGAACAAATACCACACATTCATAACTGATCGCTTGTGGCCAGTTTGA	scaffold_22	98.95	95	1	0	1	95		265987	265893	2e-44	180
scf622.2	III	120.551	<hkxhk>,(hh,hk,kk),hh,HK,hk,hh,kk,hk,hk,kk,hh,hk,hh,HK,hh,hk,kk,hh,hh,hk,hh,hk,hk,hh,hk,hh,HK,hk,hh,hk,hk,hk	TGCAGGACTGGGGCGTCCTCTGCTGTCAATTGTTGTGTTCTTAGCTGGATAAAACGGAGTTCAGGTGAAGTGGAAAATCAAGAAATGAATTCCCT	scaffold_622	100	95	0	0	1	95		428014	427920	1e-46	188
scf430	III	124.09	<lmxll>,(ll,lm),lm,ll,lm,lm,ll,lm,--,ll,lm,ll,lm,lm,lm,ll,ll,lm,lm,lm,lm,ll,lm,lm,ll,LM,ll,lm,lm,ll,ll,ll	TGCAGGAAAAACGACGCTGCATGTTCGCGCGTTGACTGACGCGGATCGCAATTGATGGACGCCTCTGCGCTTCGAGATGCCACATCCACCAAGCT	scaffold_430	97.89	95	2	0	1	95		243631	243537	6e-42	172
scf3.1	III	131.352	<hkxhk>,(hh,hk,kk),hh,hk,hk,hh,kk,hk,hk,kk,hh,hk,hh,hk,hh,hk,kk,hh,hk,hk,hh,hk,hk,hh,hk,hh,HK,hk,hh,hk,hk,kk	TGCAGGTGGATGATTTCCGTGCTGAGAGACGTACCAGACATTGATATAACGATGTAAACAAAAGTTATTTAGCATTGTTTTTGAGTCACAGGAAC	scaffold_3	97.89	95	2	0	1	95		425290	425384	6e-42	172
scf3.2	III	133.094	<hkxhk>,(hh,hk,kk),hh,hk,hk,hh,kk,hk,hk,kk,hh,hk,hh,hk,hh,hk,kk,hh,hk,hk,hh,hk,hk,hh,hk,hh,hh,hk,hh,hk,hk,kk	TGCAGGTGAGCGATAGCTGGTAACCCGCATGACAAATGATCGTGTCCCATCCTGATGCACTGACAGCAGAAAGACCTCAAATGGCTAGCATAGAC	scaffold_3	100	95	0	0	1	95		334413	334319	1e-46	188
scf3	III	136.726	<hkxhk>,(hh,hk,kk),HK,hk,hk,kk,hh,hk,hk,hk,kk,hk,kk,hk,kk,hk,hh,kk,hk,hk,kk,hk,hk,kk,hk,kk,kk,hk,kk,hk,hk,hh	TGCAGGGCGTACGGAATGAAGAGCACCCTGCTTACAGCGCTGTGTTCGGAAAGAGACAAAAGCCAGAGCCTTGAACAAACTGTTGGCGGGAAGTG	scaffold_3	96.84	95	3	0	1	95		775974	776068	1e-39	165
scf3.3	III	136.726	<lmxll>,(ll,lm),ll,lm,ll,ll,lm,ll,ll,lm,ll,lm,ll,ll,ll,lm,LM,ll,ll,ll,ll,ll,ll,ll,lm,ll,ll,lm,ll,lm,lm,lm	TGCAGGATCGTGGGAGTTAAGTTATCTTATTTGCCCATGTAAGATATTTTAAAATACGATAACCCCTTTCACAAGGCAAGCTGAGGTGACGATTC	scaffold_3	98.95	95	1	0	1	95		79546	79640	2e-44	180
scf588.1	III	136.726	<lmxll>,(ll,lm),ll,lm,ll,ll,lm,ll,ll,lm,ll,lm,ll,ll,ll,lm,lm,ll,ll,ll,ll,ll,ll,ll,lm,ll,ll,lm,ll,lm,lm,lm	TGCAGGCAGCGGGGGCCCAGATGATGCCACCGCCGGCGGGAGTGGAGCGTCCTCGGGACCCAAAATTCCACCGTCGTAAGTGCCGGCGGCAACAC	scaffold_588	98.95	95	1	0	1	95		227323	227417	2e-44	180
scf246.1	III	161.358	<nnxnp>,(nn,np),--,nn,--,np,np,np,np,nn,nn,nn,np,NP,nn,nn,nn,nn,np,--,nn,nn,NP,--,np,np,nn,--,np,--,nn,--	TGCAGGATTTAGAAGCATGCTGTTGCATTCACAGATGGGCACTGCGCATTTGTATGTACAAAAACAAAGAGACATACAAACAATCATACATACAC	scaffold_246	100	95	0	0	1	95		73234	73328	1e-46	188
scf24925	III	161.358	<hkxhk>,(hh,hk,kk),HK,hk,kk,kk,hk,kk,kk,hh,hk,hh,kk,kk,hk,hh,hh,hk,kk,kk,hh,hk,kk,hk,hk,kk,HK,HK,kk,hh,hh,hk	TGCAGGTATTAACCAGGGCGGCCCACCGGAATCCAACGCAGTGAACTTCTGTGACAAGCAGTGAACGCCCAACCGCTTGACCATTTACATTTATC	scaffold_24925	98.95	95	1	0	1	95		359642	359736	2e-44	180
scf24925.3	III	161.358	<nnxnp>,(nn,np),nn,nn,np,np,np,np,np,nn,--,nn,np,np,nn,nn,--,nn,np,np,nn,nn,np,nn,np,np,nn,nn,np,nn,nn,np	TGCAGGAGCCCACGGTCGCACGCGCTCAGAGACCCGTACCGCGCGCGTTGCGTCTCGGGCGACGTCTCACGAACCAACGCGCGCCGCGTGCCAAC	scaffold_24925	100	95	0	0	1	95		410380	410286	1e-46	188
scf1554	III	166.377	<lmxll>,(ll,lm),lm,lm,lm,lm,ll,lm,lm,ll,lm,ll,lm,lm,lm,ll,ll,lm,lm,lm,ll,ll,lm,lm,ll,lm,ll,lm,lm,ll,ll,ll	TGCAGGGCTGAGGAAAAACTTTGTCGAGTCCGGTCAGGGAGCACTCGTCAACAATGTGCGACAGAGTCTGTGACTGGCCGCATCCACACAGTGGG	scaffold_1554	100	95	0	0	1	95		43569	43663	1e-46	188
scf1554.1	III	166.377	<lmxll>,(ll,lm),ll,ll,ll,ll,lm,ll,ll,lm,ll,lm,ll,ll,ll,lm,lm,ll,ll,ll,lm,lm,ll,ll,lm,ll,lm,ll,ll,lm,lm,lm	TGCAGGGGAAACTGTGGACAATGTCAGTGGGTTTTTTTAAACATTTTAGTTATCAAACGTGACACTCAACAGAGTCATACACAGTTAAGGAAGGT	scaffold_1554	100	95	0	0	1	95		31132	31226	3e-34	147
scf1554.2	III	166.377	<lmxll>,(ll,lm),lm,lm,lm,lm,ll,lm,LM,ll,lm,ll,lm,lm,lm,ll,ll,lm,lm,lm,ll,ll,lm,lm,ll,lm,ll,lm,lm,ll,ll,ll	TGCAGGTCCTGCGAATCATAGCAACTTGGCAAGTACACGAATGAAACAAAATAAACAACACATATTTTTAATCACATGTAACGGGCATACTTGTG	scaffold_1554	98.95	95	1	0	1	95		17037	16943	2e-44	180
scf1554.3	III	166.377	<lmxll>,(ll,lm),lm,LM,lm,lm,ll,lm,lm,ll,lm,--,lm,lm,lm,ll,ll,lm,lm,lm,ll,ll,lm,lm,ll,lm,ll,lm,lm,ll,ll,ll	TGCAGGCGCCCTGGTTAATACTCCAGGTGCCCTGTTTGCTTCACAGTGGAAGTTCAAGATCCAATGACGTTATTCGAAAAAGGGCTGGCTCTATG	scaffold_1554	98.95	95	1	0	1	95		50704	50610	2e-44	180
scf24925.1	III	168.796	<lmxll>,(ll,lm),lm,lm,lm,lm,ll,lm,LM,ll,lm,ll,lm,lm,lm,ll,lm,lm,lm,lm,ll,ll,lm,lm,ll,lm,ll,lm,lm,ll,ll,ll	TGCAGGTTTCTGTAGCAATAATTGGCAGTGATGCCACCACGGCATGTTTGTCTGGCTAGGTGCACGTTCAGGCCATGCGAAGTAGCAAAAATATA	scaffold_24925	100	95	0	0	1	95		187997	188091	1e-46	188
scf1262	III	173.815	<hkxhk>,(hh,hk,kk),hk,hk,hh,hh,hk,hh,hh,kk,hk,kk,hh,hh,kk,kk,hk,hk,hh,hh,kk,hk,hk,hh,hk,hh,kk,hk,hh,kk,kk,hk	TGCAGGGTGTGGGGAGGCCCGCACCCAGCATTGGATTGGCAAAGGACTGTACTTGTACACATGGACATGACGGACGCACGAGTGATGGACGTCGA	scaffold_1262	97.89	95	2	0	1	95		2419	2513	6e-42	172
scf1262.2	III	173.815	<nnxnp>,(nn,np),nn,nn,np,np,np,np,np,nn,nn,nn,np,np,nn,nn,nn,nn,np,np,nn,np,np,np,np,np,nn,nn,np,nn,nn,np	TGCAGGCGCGGTCCACCACCAGCAATGAGCCCGTACCTTTAGCACATGTGCAGGTGTTATGCTCAAGCCCCGTGGAAAAATGTGGCATTTGTAGC	scaffold_1262	100	95	0	0	1	95		15135	15229	1e-46	188
scf1262.3	III	173.815	<nnxnp>,(nn,np),np,np,nn,nn,nn,nn,nn,--,np,--,nn,nn,--,--,np,np,nn,nn,--,nn,nn,nn,nn,nn,--,np,nn,--,--,nn	TGCAGGTAGCATGGGAACATAGAAGTACAGTGCAACAATGGACGTTGCTACACTTCCCTCTGCTGCCCACCACTTATCCCCCTTGAACCGATTAC	scaffold_1262	96.84	95	3	0	1	95		2422	2328	1e-39	165
scf147.1	III	173.815	<lmxll>,(ll,lm),ll,ll,ll,ll,lm,ll,ll,lm,ll,lm,ll,ll,lm,lm,ll,ll,ll,ll,lm,lm,lm,ll,lm,ll,lm,ll,ll,LM,lm,lm	TGCAGGGTGCTGGTGCTTGGGGTCTTGCGCTGCGAAACTGCAACTTGACAGAACCTAATGTCGTAATTGTCGGGATAAATGATGTACCGAATATG	scaffold_147	96.84	95	3	0	1	95		362010	361916	1e-39	165
scf24925.2	III	173.815	<nnxnp>,(nn,np),nn,nn,np,np,np,np,np,nn,nn,nn,np,NP,nn,nn,nn,nn,np,np,nn,np,np,np,np,np,nn,nn,np,nn,nn,np	TGCAGGTTAAACGCTACTGTTTAGTGCATAAATTTATTTTACATCTGACTGTAAACATGTGACAGTGGTTAATGTAGTAGCACAGTACAATTCTA	scaffold_24925	98.95	95	1	0	1	95		64657	64751	2e-44	180
scf3201	III	173.815	<lmxll>,(ll,lm),ll,ll,ll,ll,lm,ll,ll,lm,ll,lm,ll,ll,lm,lm,ll,ll,ll,ll,lm,lm,lm,ll,lm,ll,lm,ll,ll,lm,lm,lm	TGCAGGCTAGTAGTCACGAGCCGCGATGCAGAGGCTTCTTGCCTTTGTCTGCGGTAATCTGACCGGTTTACCGCGTGTTATTCAGTGTATTGTCC	scaffold_3201	100	95	0	0	1	95		35238	35144	1e-46	188
scf616	III	173.815	<efxeg>,(ee,ef,eg,fg),eg,eg,ee,ee,ef,ee,ee,fg,eg,fg,ee,ee,fg,fg,eg,eg,ee,ee,fg,ef,ef,ee,ef,ee,--,eg,ee,fg,fg,ef	TGCAGGGCTCGGGATGATGGAAGGGCAGGTGACCAAAGTCCTGAGGGACGGACGGCGAGTAGGCGCCACGGAAGGGATTCTGGGAAGCACCGGGA	scaffold_616	97.89	95	2	0	1	95		143664	143570	6e-42	172
scf616.1	III	173.815	<hkxhk>,(hh,hk,kk),hk,hk,kk,kk,hk,kk,kk,hh,hk,hh,kk,kk,hh,hh,hk,hk,kk,kk,hh,hk,hk,kk,hk,kk,hh,hk,kk,hh,hh,hk	TGCAGGCCACACGAGAGGCTGGGGTGGCCAGCATCACGCCCGTCCGCCTTTATCTCCCTAATCTCGATGCTTGCACATCGCATCACGTACTAATT	scaffold_616	98.95	95	1	0	1	95		372987	373081	2e-44	180
scf616.4	III	173.815	<nnxnp>,(nn,np),np,np,nn,nn,nn,nn,nn,np,np,np,nn,nn,np,np,np,np,nn,nn,np,nn,nn,nn,nn,nn,np,np,nn,np,np,nn	TGCAGGCTTATGTAATATAAAACTCAAATGGAGATGGCCAGGGTATCTTGCTTGGACATCAGATGACAGTTGGGTGAGATTAATTAACAGAATGG	scaffold_616	100	95	0	0	1	95		116355	116261	1e-46	188
scf616.5	III	173.815	<nnxnp>,(nn,np),nn,nn,NP,np,np,np,np,nn,nn,nn,np,np,nn,nn,nn,nn,np,np,nn,np,np,np,np,np,nn,nn,np,nn,nn,np	TGCAGGAGTCATATTTGAATCGTGGGTGATTTACGTAGGAATTTGGCAATGTTCACGGTAAAATAGCCATTCACTTTCATGGTGTTTTGAGAGGG	scaffold_616	100	95	0	0	1	95		182003	181909	1e-46	188
scf616.2	III	175.512	<hkxhk>,(hh,hk,kk),hk,hh,hk,hk,kk,hk,hk,hk,hh,hk,hk,hk,hk,hk,hh,hh,hk,hk,hk,kk,kk,hk,kk,hk,hk,hh,hk,hk,hk,kk	TGCAGGAATCACCAGCTACTAGTGTGCACTATGTGCATTTTTCCCAGGTCTGTGTGTAATATGTTACAATATAAATTCCACTGTTAAAAGCAAGA	scaffold_616	98.95	95	1	0	1	95		182000	182094	2e-44	180
scf1262.1	III	178.224	<nnxnp>,(nn,np),nn,nn,np,np,np,np,np,nn,nn,nn,np,np,nn,nn,nn,nn,np,np,nn,np,np,np,np,np,nn,np,np,nn,nn,np	TGCAGGACGTGCGTATGGAGTCTATGTTATATATGTATGTATGTTGTTGAACTCATTTCACACCACACGAAGCCAACCGTGCTTATCGGAGGTGC	scaffold_1262	100	95	0	0	1	95		49127	49221	1e-46	188
scf246	III	178.224	<nnxnp>,(nn,np),nn,nn,np,np,np,np,np,nn,nn,nn,np,np,nn,nn,nn,nn,np,np,nn,np,np,np,np,np,--,np,np,nn,nn,np	TGCAGGCATCTTTTGGGTTTGTCTCTGCTGTGTGTGCACCTCTGACATTGTATATTGTGAGACCTTTTAACAAAATGGCAACTGATGAATATCTG	scaffold_246	96.84	95	3	0	1	95		73237	73143	1e-39	165
scf246.2	III	178.224	<nnxnp>,(nn,np),np,np,nn,nn,nn,nn,nn,np,np,np,nn,nn,np,np,np,np,nn,nn,np,nn,nn,nn,nn,nn,np,nn,nn,np,np,nn	TGCAGGTGACGCTGTACCACTGGGACCTGCCGTCAGCGCTACAGGCAATGGGCGGCTGGAGGGATGAGCGCTTGGTCGAACTCTTTGCCAACTAC	scaffold_246	100	94	0	0	1	94		457550	457643	4e-46	186
scf246.3	III	178.224	<nnxnp>,(nn,np),nn,nn,np,np,np,np,np,nn,nn,nn,np,np,nn,nn,nn,nn,np,np,nn,np,np,np,np,np,nn,np,np,nn,nn,np	TGCAGGAAGCCGCCGTGCCTGTGCACCTCCAGGGAGAGGACGACCTGCCAAGTGACCTGGACCCGGTGAGTTTTACTTTAAAACGTCGACTGCAT	scaffold_246	98.95	95	1	0	1	95		26371	26277	2e-44	180
scf2908	III	178.224	<nnxnp>,(nn,np),np,np,nn,nn,nn,nn,nn,np,np,np,nn,nn,np,np,np,np,nn,nn,np,nn,nn,nn,nn,nn,np,nn,nn,np,np,nn	TGCAGGACCCGTTGGGCCAAGTGCTCTCTGAGCAGCTGCTTGCGTCTGCGCCGCCTGTTTCTGGGGCCGGACGCCAGTGATGTTGCCTTTCTGAC	scaffold_2908	100	95	0	0	1	95		57911	58005	1e-46	188
scf7502.1	III	178.224	<nnxnp>,(nn,np),nn,nn,np,np,np,np,np,nn,nn,nn,np,np,nn,nn,nn,nn,np,np,nn,np,np,np,np,--,--,np,np,nn,nn,np	TGCAGGGCTTCGAGGTAAGTGCGTGGCACACACCCCGTACACCGCCCCACCGCGCCCCGCGACGTCACAGTCAACGTTCGCTGCCGCGGCGTGGA	scaffold_7502	100	95	0	0	1	95		10440	10534	1e-46	188
scf4064	III	179.435	<hkxhk>,(hh,hk,kk),hk,hh,hk,hk,kk,hk,hk,hk,hh,hk,hk,hk,hk,hk,hh,hh,hk,hk,hk,kk,kk,hk,kk,hk,hk,hk,hk,hk,hk,kk	TGCAGGTGGGCTCACAATTGAGAAAACGCCAAGAGTGGAAAATGCCTACGTGAAGGGAATGGTGACCGCTGTGATAAATTCTGATTTGTGATGAG	scaffold_4064	100	95	0	0	1	95		16695	16601	1e-46	188
scf415.1	III	182.178	<nnxnp>,(nn,np),nn,np,nn,nn,nn,np,nn,np,np,np,nn,nn,np,np,np,np,nn,nn,np,nn,nn,nn,nn,nn,np,nn,nn,np,np,nn	TGCAGGTGTTCGGGCTCCTGAGCACACAATGGCCCATTTGCAACAAGACATGGGCGTGCATTATTGCAAACGTTCAAACAACCACCCGCACAAGA	scaffold_415	100	95	0	0	1	95		269858	269764	1e-46	188
scf415.2	III	182.178	<nnxnp>,(nn,np),nn,np,nn,nn,nn,np,nn,np,np,np,nn,nn,np,np,np,np,nn,nn,np,nn,nn,nn,nn,nn,np,nn,nn,np,np,nn	TGCAGGGCATGCTTGGCAGAATCGCACATTCATGCCCAGACACATACACACAAGGATCCCAGACGTCATCTTGAACAAACTGTTCGGAGCTAGGA	scaffold_415	98.95	95	1	0	1	95		98195	98101	2e-44	180
scf415.3	III	182.178	<nnxnp>,(nn,np),np,nn,--,np,np,nn,np,nn,nn,nn,np,np,nn,nn,nn,nn,np,np,nn,np,np,np,np,np,nn,np,np,nn,nn,np	TGCAGGAACCTGTTTTTCCCTCTGGCCATGCAATGAATCGGATAGCCGCAAGGATCTAATGCCAGTCTTTAATACCCCCGGTTGCTTTTACACGT	scaffold_415	96.88	96	2	1	1	95		281666	281761	9e-38	159
scf8287	III	182.178	<nnxnp>,(nn,np),nn,np,nn,nn,nn,np,nn,np,np,np,nn,nn,np,np,np,np,nn,nn,NP,nn,nn,nn,nn,nn,np,nn,nn,np,np,nn	TGCAGGAGCCGGCGCTGAAATGAGATACTGCAAGACCCCTTGCCGAGTACCGGCCAAGGGACGTCTCTTACCTGCTGCGGACAGAGTCATTTCTT	scaffold_8287	100	95	0	0	1	95		2720	2626	1e-46	188
scf1216	III	184.161	<lmxll>,(ll,lm),lm,lm,lm,lm,ll,lm,lm,ll,lm,ll,lm,lm,ll,ll,lm,lm,lm,lm,ll,ll,ll,lm,ll,lm,ll,lm,lm,ll,ll,ll	TGCAGGAATTGTCCGAGATGGAATCTCAGTCAATCGTGCCGCTCTTGCCAACATGGCAGATTACTTGTCCGTGTCTCACTGTGCAGCTGCTATCA	scaffold_1216	100	95	0	0	1	95		11420	11326	1e-46	188
scf147	III	184.161	<hkxhk>,(hh,hk,kk),hh,hk,hh,hh,hk,hk,hk,kk,hk,kk,hh,hh,kk,kk,hk,hk,hh,hh,kk,hk,hk,hh,--,hh,kk,hh,hh,kk,kk,hk	TGCAGGCGGAGGTGAAGACCGACTTCAAGCAGCTGTTCCACCGCATGGCGTCACGCGAGGAGTTCCGCTGGATGAAGATGCGCATCCTGCGCATG	scaffold_147	98.95	95	1	0	1	95		309773	309867	2e-44	180
scf147.2	III	184.161	<lmxll>,(ll,lm),ll,ll,ll,ll,lm,ll,ll,lm,ll,lm,ll,ll,lm,lm,ll,ll,ll,ll,lm,lm,lm,ll,lm,ll,lm,ll,ll,lm,lm,lm	TGCAGGTGAAGGTGGCCCAGCCAGGCCAGTCGTGCAAGCACCTGTGCCAGGAGAGCCAGCTGATCTGCGAGCCGACGTACTTTGCTCACCTCAAC	scaffold_147	100	95	0	0	1	95		332057	332151	1e-46	188
scf147.3	III	184.161	<lmxll>,(ll,lm),ll,ll,ll,ll,lm,ll,ll,lm,ll,--,ll,ll,lm,lm,ll,ll,ll,ll,lm,lm,lm,ll,lm,ll,lm,ll,ll,lm,lm,lm	TGCAGGGCGACTACCTCCTCTTCAGCTGCGCCGGCAGCCACGACACGCACCGGCGAATCTGCCCGTGCCGTGATTACATGAAGGGCCAGGTGGCG	scaffold_147	98.95	95	1	0	1	95		335458	335552	2e-44	180
scf18470	III	184.161	<lmxll>,(ll,lm),ll,ll,ll,ll,lm,ll,ll,lm,ll,lm,ll,--,lm,lm,ll,ll,ll,ll,lm,lm,lm,ll,lm,ll,lm,ll,ll,lm,lm,lm	TGCAGGCTGGAGTCGGGGAGGTAAGTCTCTCGCGTGCGCGCCCACTCACTCCGCCAGTGCGAACAAACCTGTGCCTGTGTCACAGCGGTATGCAA	scaffold_18470	98.95	95	1	0	1	95		1211	1305	2e-44	180
scf2340	III	184.161	<lmxll>,(ll,lm),ll,ll,ll,ll,--,ll,ll,lm,ll,lm,ll,ll,lm,lm,ll,ll,ll,ll,lm,lm,lm,ll,lm,ll,lm,ll,ll,lm,lm,lm	TGCAGGAGGCTGTGCTGCTGGATCTGCATGGGCGGCGGGAGGGGCAGTACTTCCGCCACCTCCTCACCCTCCTCCTCGCCGCAGCTCTGCATGCC	scaffold_2340	100	95	0	0	1	95		937	1031	1e-46	188
scf2340.1	III	184.161	<lmxll>,(ll,lm),lm,lm,LM,lm,ll,lm,LM,ll,lm,ll,lm,lm,ll,ll,lm,lm,lm,lm,ll,ll,ll,lm,ll,lm,ll,lm,lm,ll,ll,ll	TGCAGGCCGAGCGCGCTGACGACAAGGTAAGCCCCGCCCGCCCATCGCTTGGCGAACGGCTTCAACGCCGCCCACGCTTGCTCCTTCCCGCTCAC	scaffold_2340	100	95	0	0	1	95		940	846	1e-46	188
scf415	III	184.161	<nnxnp>,(nn,np),nn,np,nn,nn,nn,np,np,np,np,np,nn,nn,np,np,np,np,nn,nn,np,nn,nn,nn,nn,nn,np,nn,nn,np,np,nn	TGCAGGATGCTCATCTCCTTCCTCTGCTGCCGCTTGAGTGCCTCCTCATGGGAGCTGGGCAGGGCCCCCAGCTCCACGCTGCCACTCCGCCTCTG	scaffold_415	100	95	0	0	1	95		408697	408791	1e-46	188
scf616.3	III	184.161	<lmxll>,(ll,lm),ll,ll,ll,ll,lm,ll,ll,lm,ll,lm,ll,ll,lm,lm,ll,ll,ll,ll,lm,lm,lm,ll,lm,ll,lm,ll,ll,lm,lm,lm	TGCAGGTGAGTGGCGCTGTATCAGGCTGCAGACGTTCTGCGAAATATTTCGAGGTTGCACTGGTGTTCATAAAATAATCTCTTTGGTAAGTTAAG	scaffold_616	100	95	0	0	1	95		49478	49384	1e-46	188
scf7008	III	184.161	<nnxnp>,(nn,np),nn,np,nn,nn,nn,np,np,np,np,np,nn,nn,np,np,np,np,nn,nn,np,nn,nn,nn,nn,nn,np,nn,nn,np,np,nn	TGCAGGAATGCTTTGCAGCCTGCGTGTTCAACCAAAACGAGCACCGTCCACACCCAGGAATTCCAGGGCATTCGTAGACAAGAGCTTGTCCTAGA	scaffold_7008	98.95	95	1	0	1	95		10722	10628	2e-44	180
scf7502	III	184.161	<lmxll>,(ll,lm),lm,lm,lm,lm,ll,lm,lm,ll,lm,ll,lm,lm,ll,ll,lm,lm,lm,lm,ll,ll,ll,lm,ll,lm,ll,lm,lm,ll,ll,ll	TGCAGGGCTTCGAGGTAAGTGTGCGGCACACACCCCGTACACCGCCCCACCGCGCCCCGCGACGTCACAAAGTCAACGTTCGCTGCCGCGGCGTG	scaffold_7502	95.79	95	2	1	1	95		10440	10532	2e-35	151
scf1156	III	187.611	<nnxnp>,(nn,np),nn,np,nn,nn,nn,np,NP,np,np,np,nn,nn,np,np,nn,np,nn,nn,np,nn,nn,nn,nn,nn,np,nn,nn,np,np,nn	TGCAGGCAGTGTGTCTTGATAGATGGGGGTAATTCTCTATGAGAAAACTGTCAATTGTGCGCACAATCATTCATTCCTGATTATGAGTAACAGCG	scaffold_1156	100	95	0	0	1	95		14359	14265	1e-46	188
scf24793	III	187.754	<lmxll>,(ll,lm),--,ll,ll,ll,lm,ll,ll,lm,ll,lm,--,ll,lm,lm,ll,ll,lm,ll,lm,LM,lm,ll,lm,ll,lm,ll,ll,lm,lm,lm	TGCAGGGTGTCTACAAGGAGATGGCAGACATGTTCGACCCTCCGTCCGGGGCGCGCCAGAGGTTTAAAAACCGCCAGCGTGAAGCATCCGAATCG	scaffold_24793	95.79	95	4	0	1	95		12763	12857	3e-37	157
scf586.1	IV	0	<lmxll>,(ll,lm),--,--,--,ll,LM,lm,ll,--,lm,ll,ll,--,LM,lm,lm,lm,lm,ll,ll,--,ll,ll,ll,LM,lm,lm,LM,ll,--,ll	TGCAGGCCCCCGCGGACGCCCTCCGCCTGCGGGACACGCGGAGGAGGAGGCGCGCGTGAACGTGCGTGGGGACGCGGTAAGCGCAGTCGCGCACG	scaffold_586	98.95	95	1	0	1	95		33643	33549	2e-44	180
scf1118.1	IV	9.659	<hkxhk>,(hh,hk,kk),kk,kk,kk,hh,hk,hk,hh,kk,hk,hh,hh,kk,hk,hk,hk,hk,hk,hh,hh,kk,hh,hh,hh,hk,hk,hk,HK,hh,kk,hh	TGCAGGCGCTTCTGTGCATATTTCTCAGTGTGCCCTGCATGATTGAGTGAAGGCAGCAGTCCTGCTCTGTGCAACAGCGGGCGTACGATTTAACA	scaffold_1118	98.95	95	1	0	1	95		353954	353860	2e-44	180
scf1118.2	IV	9.659	<hkxhk>,(hh,hk,kk),hh,hh,hh,kk,hk,hk,--,hh,hk,kk,kk,hh,hk,hk,hk,hk,hk,kk,kk,hh,kk,kk,kk,hk,hk,hk,hk,kk,hh,kk	TGCAGGCACCTGTTACAGATACACAATGAGGCGCAGGTAACAGACAGACAAGGCCCACAACAACTCCCTCCTGGCTGTTCCGCTACTTGCTACTG	scaffold_1118	100	95	0	0	1	95		163998	164092	1e-46	188
scf288	IV	9.659	<hkxhk>,(hh,hk,kk),kk,kk,kk,hh,hk,HK,hh,kk,hk,hh,hh,kk,hk,hk,hk,hk,hk,hh,hh,kk,hh,hh,hh,hk,hk,hk,hk,hh,kk,hh	TGCAGGCAGAGTTGGAGGCAGTGCAGCGGGGTGAACAGGAGGCCGAGGAGCGTTCCGTGCACGACGCCAAAGCTGCGTCATCGGAGCTGGCAGAG	scaffold_288	100	95	0	0	1	95		760475	760381	1e-46	188
scf586	IV	9.659	<hkxhk>,(hh,hk,kk),hh,hh,hh,kk,hk,hk,kk,hh,hk,kk,kk,hh,hk,hk,hk,hk,hk,kk,kk,hh,kk,kk,kk,hk,hk,hk,hk,kk,--,kk	TGCAGGTGCTCTGCAATGGGGACCTGGAGAAGAACATCAAGGTACGCATATGAGCAGGCAGGGAGGCAATAACAGAAAACTCACCCTTGGGTAAC	scaffold_586	97.89	95	2	0	1	95		191648	191554	6e-42	172
scf2045	IV	30.045	<hkxhk>,(hh,hk,kk),hh,hh,hh,kk,hk,hk,kk,hh,kk,kk,kk,hh,hk,hk,hk,hk,hk,kk,kk,hh,kk,kk,kk,hk,hk,hk,hk,kk,hh,kk	TGCAGGTGGACGGGATCCTGCGCACGGACGAGTTTGAGTGTGAGCTGGAGCGGGAGTTCCGCGGGGGGACTGTGCTCAGCCTCCACAGCAACCAG	scaffold_2045	100	95	0	0	1	95		2950	3044	1e-46	188
scf1118	IV	33.491	<hkxhk>,(hh,hk,kk),hh,hh,hh,kk,hk,hk,kk,hh,hk,kk,kk,hh,hk,hk,hk,hk,hk,kk,kk,hh,kk,kk,kk,hk,hk,hk,hk,kk,hh,kk	TGCAGGGTGTCCTTAAAGTCCTTGAGGGCGAAAGCCCCATCGTTTGCTTCAAATGGCGCTGCAAGGAGAAGGATGGTCGTCAATTTAAGCAAAAC	scaffold_1118	100	95	0	0	1	95		353951	354045	1e-46	188
scf1075	IV	35.216	<hkxhk>,(hh,hk,kk),kk,kk,kk,hh,hk,hh,hh,kk,hk,hh,hh,kk,hk,hk,hk,hk,hk,hh,hh,kk,hh,hh,hh,hk,hk,hk,hk,hh,kk,hh	TGCAGGGACAACGAGGGCAGCGTTGGGGACGACGGCGTGGCCCAGGCCGCGTGCTGACCGGCACCGCTCCAGGTCGTGCAGCTGCTGCACCAAGC	scaffold_1075	100	95	0	0	1	95		29597	29503	1e-46	188
scf2692	IV	35.216	<hkxhk>,(hh,hk,kk),kk,kk,kk,hh,hk,hh,hh,kk,hk,hh,hh,kk,hk,hk,hk,hk,hk,hh,hh,kk,--,hh,hh,hk,hk,hk,hk,hh,kk,hh	TGCAGGCAGACTCATGCCGACTTGCAGGCCAGTTCCGAGTCAGCTTGTGCCACAAAAGGACAGCTGCCACTGGGGGTGCCCTCCGAAAGTTTCAA	scaffold_2692	100	95	0	0	1	95		20332	20238	1e-46	188
scf350.1	IV	35.216	<lmxll>,(ll,lm),ll,ll,ll,lm,lm,lm,lm,ll,ll,lm,lm,--,lm,ll,lm,ll,lm,lm,lm,ll,lm,lm,lm,lm,ll,lm,lm,lm,ll,lm	TGCAGGTGATTTATACGACGGCGACATATCAGGATTCCACACAGGCAGGCCTGCCCATCCGTCAATCACTCATTCCCTCACTCACTCACATAATG	scaffold_350	100	95	0	0	1	95		19977	19883	1e-46	188
scf532	IV	35.216	<hkxhk>,(hh,hk,kk),kk,kk,kk,hh,hk,hh,hh,kk,hk,hh,hh,kk,hk,hk,hk,hk,hk,hh,hh,kk,hh,hh,hh,hk,hk,hk,hk,hh,kk,hh	TGCAGGCGTGGGGGGAGGGGAGCAAACAACACCAGAGGTCACCGTCACACCAGCAGCACCAACGCTTGAAGGCAGCACTTTTATTTTTATGATTA	scaffold_532	96.84	95	3	0	1	95		10854	10948	1e-39	165
scf5636	IV	35.216	<hkxhk>,(hh,hk,kk),hh,hh,hh,kk,hk,kk,kk,hh,HK,kk,kk,hh,hk,hk,hk,hk,hk,kk,kk,hh,kk,kk,--,hk,hk,hk,hk,--,hh,kk	TGCAGGTGCCTTGTTGAGCTGCATGCGAGGGGAGGCCTCGCCGCAGGCTGCGGCAGTGGGGAGCGACTCGAATTTAAATTCCCGCTCACGATTAT	scaffold_5636	97.89	95	2	0	1	95		3305	3211	6e-42	172
scf6346	IV	35.216	<lmxll>,(ll,lm),lm,lm,lm,ll,ll,ll,ll,lm,lm,ll,ll,--,ll,lm,ll,lm,ll,ll,ll,LM,ll,ll,ll,ll,lm,ll,ll,ll,lm,ll	TGCAGGCATCACCTCATCGCTCCGCAGTCGTTTATCAAACGGTCGATGATTATCCTGGGAGTGTGTGGGGGGTTCGACGCAGCCTCCGGTACACC	scaffold_6346	98.95	95	1	0	1	95		14684	14778	2e-44	180
scf10134	IV	36.94	<hkxhk>,(hh,hk,kk),kk,kk,kk,hh,hk,hh,hh,kk,hk,--,hh,kk,hk,hk,hk,hk,hk,hh,hh,kk,hh,HK,hh,hk,hk,hk,hk,hh,kk,hh	TGCAGGCAAGAAATACTGGTACATGATGAAATCTGCATTTGACTCCTCGAGATGCATGTAACAAAATTCTGATTGTTTTAACTGAGTATAAGTAC	scaffold_10134	100	95	0	0	1	95		21324	21230	1e-46	188
scf5790.1	IV	37.803	<lmxll>,(ll,lm),ll,ll,ll,lm,lm,lm,lm,ll,ll,lm,lm,ll,lm,ll,lm,ll,lm,lm,lm,ll,lm,lm,lm,lm,ll,lm,lm,lm,ll,lm	TGCAGGGAGGAGATGGAGCGCACAAATCAGTTATTGGGAAGGTGACAGGTGGATTGCTACTGAGCAGGGCCGTAAGAGGTAGCAGCGGTGGCTTG	scaffold_5790	97.83	92	2	0	4	95		11963	12054	4e-40	167
scf6413	IV	38.665	<hkxhk>,(hh,hk,kk),kk,kk,kk,hh,hk,hh,hh,kk,hk,hh,hh,kk,hk,hk,hk,hk,hk,hh,hh,kk,hh,hh,hh,hk,hk,hk,hk,hh,kk,hh	TGCAGGGCAGCGTGCTGGCGGCGGCTACAACAGCAACAATGCGCCATGCAACACGTACATGCACAGGCACACGCGCACGCAAACGCACGCGCACA	scaffold_6413	100	94	0	0	1	94		16668	16575	4e-46	186
scf102	IV	40.39	<efxeg>,(ee,ef,eg,fg),ee,ee,ee,fg,ef,fg,fg,ee,eg,fg,fg,ee,ef,--,ef,eg,ef,fg,ef,ee,fg,fg,fg,ef,eg,ef,ef,fg,ee,fg	TGCAGGAAATCGGCAAAAATATTCACTCAGGTTTGCCCCAACACTTGCCGACGCGGCACTAACCGATTAAAGGGCTATTTCCCACGACAAACAGC	scaffold_102	100	95	0	0	1	95		327854	327948	1e-46	188
scf102.2	IV	40.39	<hkxhk>,(hh,hk,kk),kk,kk,kk,hh,hk,hh,hh,kk,HK,hh,hh,kk,hk,hk,hk,hk,hk,hh,hk,kk,hh,hh,hh,hk,hk,hk,hk,hh,kk,hh	TGCAGGTCCCCGATAGCAACACAATGTACTTTGTGGGTTATCTTAACACGAGTTACCGTGACCCCATCCTACAGACAGACATACTTTGACTTTTA	scaffold_102	98.95	95	1	0	1	95		327857	327763	2e-44	180
scf350	IV	40.39	<lmxll>,(ll,lm),ll,ll,ll,lm,LM,lm,LM,ll,ll,lm,lm,ll,lm,ll,lm,ll,lm,LM,lm,ll,lm,lm,lm,lm,--,LM,lm,lm,ll,lm	TGCAGGCAAGCTGTACGCTTAACACATTGAAAAATGAAGTGCAGTGATAAGTGGGAATATATATGTCACCTGATGATGATTGCTTGTGTTGCAGT	scaffold_350	98.95	95	1	0	1	95		199536	199442	2e-44	180
scf5790	IV	40.39	<lmxll>,(ll,lm),lm,lm,lm,ll,ll,ll,ll,lm,lm,ll,ll,lm,ll,lm,ll,lm,ll,ll,ll,lm,ll,ll,ll,ll,lm,ll,ll,ll,lm,ll	TGCAGGTGCCTATCGGATGCGTTACCTTATTTGCCCTAAACGTAGGGTATTAGTCTTTGTATTTACAGGCGCTCGCTAAATGTTAGTTGCCCCGA	scaffold_5790	98.92	93	1	0	3	95		11961	11869	4e-43	176
scf350.2	IV	43.992	<nnxnp>,(nn,np),np,np,np,nn,np,nn,nn,np,nn,nn,nn,np,np,nn,np,nn,np,nn,nn,np,nn,nn,nn,np,nn,np,np,nn,np,--	TGCAGGTTACAAGGGAAAATTGGCATTGCACAAAACGATCGAGGCGAACCTTTCTCCATTTCGTCATCGTCAACAGCCGTTCTCTATCCACTGCT	scaffold_350	100	95	0	0	1	95		199533	199627	1e-46	188
scf752.1	IV	58.105	<hkxhk>,(hh,hk,kk),hk,hk,hk,kk,hk,kk,kk,hk,hk,kk,kk,hk,hk,HK,hk,hk,HK,kk,kk,hk,kk,kk,kk,hk,hk,hk,kk,kk,hk,kk	TGCAGGTCTAGGGCGCCTCCCAGTGGTGAAGGGAAGGCAACCCCCCAGCCCCATGCTTACCACCAGACTGGCCACACTCCTCGTCGCGACAATGC	scaffold_752	98.95	95	1	0	1	95		21337	21243	2e-44	180
scf3401	IV	69.874	<hkxhk>,(hh,hk,kk),hh,hk,hh,hk,hk,hk,hk,hk,kk,hk,hk,hh,hk,kk,hh,kk,hh,hk,hh,hh,hk,hk,hk,hh,kk,hh,hh,hk,kk,hk	TGCAGGACAGGTTCCAGGACTACCACGAGTGTGCCTCCTGCAAGATTAGCTTCACCGAGGTGGAGGGCTACATCGTACACAAGCAGTTCCATTGC	scaffold_3401	98.95	95	1	0	1	95		8994	9088	2e-44	180
scf612	IV	69.874	<lmxll>,(ll,lm),lm,ll,lm,lm,ll,lm,lm,ll,ll,lm,lm,lm,lm,ll,lm,ll,lm,LM,lm,lm,lm,lm,lm,lm,ll,lm,lm,lm,ll,lm	TGCAGGATTTATCGTAATCTTTTAGTATATTATCAGAAAATCAGTTTGTTAGGAAAACGTTACATTTTTTTCTGCAAGTGGACAATTATACAAAC	scaffold_612	100	95	0	0	1	95		71019	70925	3e-34	147
scf14997	IV	71.599	<efxeg>,(ee,ef,eg,fg),fg,eg,fg,ef,eg,ef,ef,eg,ee,ef,ef,fg,ef,ee,fg,ee,fg,ef,fg,fg,ef,ef,ef,fg,ee,--,eg,ef,ee,ef	TGCAGGCCTATGTAGTGGACAGCAGAGGACTGCATCAAAACCGATTGTTGTGCTCTACTTCTATGCTTTCACATTTCACGTTCTCTACTTTCAGA	scaffold_14997	100	95	0	0	1	95		4724	4630	1e-46	188
scf14997.1	IV	71.599	<nnxnp>,(nn,np),np,np,np,nn,np,nn,nn,np,nn,nn,nn,np,nn,nn,np,nn,np,nn,np,np,nn,nn,--,np,nn,NP,np,nn,nn,nn	TGCAGGTTAACACAACGTGTTGTGCAGGGTGTTAGATGAAATATTAAATCAATTATAGTTTTCAAAATGTAAAATTGTGTTGTATGGCTTTTCAT	scaffold_14997	100	95	0	0	1	95		4721	4815	1e-46	188
scf654	IV	73.359	<lmxll>,(ll,lm),LM,ll,lm,lm,ll,lm,lm,ll,ll,LM,lm,lm,lm,ll,lm,ll,lm,lm,lm,lm,lm,lm,lm,lm,ll,--,ll,lm,ll,lm	TGCAGGTCAGCATTCATTTTATGATAAATATGTACATTTTAGAGCCGCTATGCCTCTATAAGAAATTGGGATGCATTACCTCAGGGCATTTTCTC	scaffold_654	100	95	0	0	1	95		63623	63529	1e-46	188
scf10738	IV	75.118	<hkxhk>,(hh,hk,kk),kk,hk,kk,hk,--,hk,hk,hk,hh,hk,HK,kk,HK,hh,kk,hk,kk,hk,kk,kk,hk,hk,hk,kk,hh,kk,hk,hk,hh,hk	TGCAGGGTGGGATAAAGGTTTAAAGCAGGAAGGGAAGTGTACGCGTCCGCGAGTGCCCGACTACCCCGAGGCCAAGATGCATGCGTGTGCGCGCG	scaffold_10738	98.95	95	1	0	1	95		7678	7772	2e-44	180
scf654.1	IV	75.118	<lmxll>,(ll,lm),ll,lm,ll,ll,lm,ll,ll,lm,lm,ll,ll,ll,ll,lm,ll,lm,ll,ll,ll,ll,ll,ll,ll,ll,lm,ll,lm,ll,lm,ll	TGCAGGACATCAACATGCTGGACAGGACTCATACCTACGTATGCCCACAGAATATCATGGACGCCACGAAGGACTTCCGTGAGGACCTCACACGG	scaffold_654	100	95	0	0	1	95		24748	24842	1e-46	188
scf1535	IV	76.893	<efxeg>,(ee,ef,eg,fg),fg,eg,fg,ef,--,ef,ef,fg,ee,ef,ef,fg,ef,ee,fg,eg,fg,ef,fg,fg,ef,ef,ef,--,ee,fg,eg,ef,ee,ef	TGCAGGGTGGGCTGGTAGGAACATTGGAATTTTGTATTCGGCTGTGGGCTGTGTGTGAATTTGCCACACTCCCCAAAAGCGAAGTTCGCAAATGA	scaffold_1535	100	95	0	0	1	95		3008	2914	1e-46	188
scf2224	IV	76.893	<efxeg>,(ee,ef,eg,fg),--,--,fg,ef,ee,ef,ef,fg,ee,ef,ef,fg,--,ee,fg,eg,fg,ef,fg,fg,ef,ef,ef,fg,--,fg,eg,ef,ee,ef	TGCAGGAATAAGCTGCTGCCATGATCTCACCGTGATCACACTCCATTTGCAATCCAGAGGTCACCAGTTTAATATCCCAGCGTGGCCAACTCCTT	scaffold_2224	98.95	95	1	0	1	95		60202	60108	2e-44	180
scf603	IV	76.893	<lmxll>,(ll,lm),lm,ll,lm,lm,ll,lm,lm,lm,ll,lm,lm,lm,lm,ll,lm,ll,lm,lm,lm,lm,lm,lm,lm,lm,ll,lm,ll,lm,ll,lm	TGCAGGTAAACTTGCATTTATCTATAATAATCAATTACATGACAGTAATTAATTGGACGTATTCTGCTACAGCATTTTATTGTAGTTTTATTGCA	scaffold_603	100	95	0	0	1	95		225615	225521	1e-46	188
scf603.1	IV	76.893	<lmxll>,(ll,lm),--,ll,lm,lm,ll,lm,lm,lm,ll,lm,lm,lm,lm,ll,lm,ll,lm,lm,lm,lm,lm,lm,lm,lm,--,lm,ll,lm,ll,lm	TGCAGGAGGCTATACAGCTAATTGTTTGACCCAAGAGTGTGACATTTGTACATGTGGATTTTCCTCGGACAATTTGTATTATTTCCACAAAACGA	scaffold_603	100	95	0	0	1	95		204061	203967	1e-46	188
scf603.3	IV	76.893	<lmxll>,(ll,lm),ll,lm,ll,ll,lm,ll,ll,ll,lm,ll,ll,ll,ll,lm,ll,lm,ll,ll,ll,ll,ll,ll,ll,ll,lm,ll,lm,ll,lm,ll	TGCAGGGGCCTGCTGGCGCTGGAGACCTGTCCTTCTCCGTGGCCTCATACTATTCATCCTATTGAGCACTCTCATAATTTAACTCATGCTTGCGA	scaffold_603	98.95	95	1	0	1	95		36382	36288	2e-44	180
scf603.4	IV	76.893	<nnxnp>,(nn,np),np,np,np,nn,nn,nn,nn,np,nn,nn,nn,np,nn,nn,np,np,np,nn,np,np,nn,nn,nn,np,--,NP,np,nn,nn,nn	TGCAGGTGTTAGGACCAGGACATTGATTCTGGAGCAACTTTATGTGCATCATCCCCTCCCTTAAGAGCGGATTAATTACAAATATCTGGTACACT	scaffold_603	100	95	0	0	1	95		249413	249319	1e-46	188
scf603.5	IV	76.893	<nnxnp>,(nn,np),nn,nn,nn,NP,np,np,np,nn,np,np,np,nn,np,np,nn,nn,nn,np,nn,nn,--,np,np,nn,np,nn,nn,np,NP,np	TGCAGGCTACAGAAACAAGATAAGCAAATACAGATAAGATGGAACAGCGCAAGCACCACATACAGCGAGGGAAAAAAGTATTTGATCCCCTGCTG	scaffold_603	100	95	0	0	1	95		206374	206280	1e-46	188
scf603.7	IV	76.893	<nnxnp>,(nn,np),nn,nn,nn,np,np,np,np,nn,np,np,np,nn,np,np,nn,nn,nn,np,nn,nn,np,np,np,nn,np,nn,nn,np,np,np	TGCAGGTACAGCACCTGGGAGGAGAGCGCAACCAATCCTTGTACGCACTTAAGGAGATACACTGCATTAAATGCATCTTGTGCCTTTGGCTTTGT	scaffold_603	100	95	0	0	1	95		284658	284564	1e-46	188
scf603.9	IV	76.893	<nnxnp>,(nn,np),nn,nn,nn,np,np,np,np,nn,np,np,np,nn,np,np,nn,nn,nn,np,nn,nn,np,np,np,nn,np,nn,nn,np,np,np	TGCAGGATGCATCACTCAGCCTATCAATAGCAATCTGCAAAAGCAACAACTCTCTTCACAAGCGATTCATTCCCATTTTAGGGGAATCGGAAGAA	scaffold_603	100	95	0	0	1	95		249410	249504	1e-46	188
scf384.1	IV	88.167	<hkxhk>,(hh,hk,kk),hk,kk,hk,hh,hk,hk,hh,hk,hk,hh,hk,hk,hh,hh,--,hk,hk,hh,hk,--,hh,hh,hh,hk,hk,hk,kk,hh,hk,hh	TGCAGGCTTTTCCTTTCATTGCCTCGTGGCCTTTTCGCCGGTATCTTTACTTCTAGAGCTTCCTTCAGCGGGCCTGCCTTTCGAACAATATGTTC	scaffold_384	100	95	0	0	1	95		196648	196554	1e-46	188
scf3071	IV	88.192	<lmxll>,(ll,lm),lm,ll,lm,lm,ll,lm,lm,lm,ll,LM,ll,lm,lm,lm,ll,lm,lm,lm,lm,lm,lm,lm,lm,LM,ll,lm,ll,lm,ll,lm	TGCAGGGGCTCCCAGCGTGTGCAAAAAAACGTTGGACAATCGTCCGAGAAAAGTGCGGCACAACGCAATAACACATGGGAGAGCGGTACTTTAAT	scaffold_3071	97.89	95	2	0	1	95		26330	26424	2e-29	131
scf2148	IV	88.217	<nnxnp>,(nn,np),--,nn,nn,np,np,nn,np,nn,np,np,np,nn,np,np,nn,nn,nn,np,nn,np,np,np,np,nn,np,nn,nn,np,np,np	TGCAGGGCAGCAAGCCGCCGTTGGGATGCAGGAGGGTTGAGGGCTTCCTGACCATTGGTCCCGGTGTTTTCAGTCTTGTCACCCCTGTACGCGTG	scaffold_2148	100	95	0	0	1	95		34325	34231	1e-46	188
scf384	IV	88.217	<efxeg>,(ee,ef,eg,fg),eg,fg,eg,ee,ef,eg,ee,eg,ef,ee,ef,eg,ee,ee,fg,eg,eg,ee,eg,ee,ee,ee,ee,eg,ef,eg,fg,ee,ef,ee	TGCAGGCCAGCACGCAATTTCACATTGGTGGTGACGTTTGCACTTTGCTGGCAGTGGGCTCGGGTCCCCGAGTGCATGCGTGATTGGTTTCTCGC	scaffold_384	100	95	0	0	1	95		111389	111295	1e-46	188
scf384.2	IV	88.217	<hkxhk>,(hh,hk,kk),hk,kk,hk,hh,hk,hk,hh,hk,hk,hh,hk,hk,hh,hh,kk,hk,hk,hh,hk,hh,hh,hh,hh,hk,hk,hk,kk,hh,hk,hh	TGCAGGAATCAATAACGAATTATATTATTTTACAATTATAATTAAAGCTATAGTTTACGTTGGGGCGACCTTGGGAAAGAGCGAGGGTGAAAGCG	scaffold_384	98.95	95	1	0	1	95		136532	136438	2e-44	180
scf322	IV	90.006	<lmxll>,(ll,lm),lm,ll,lm,lm,ll,lm,lm,lm,ll,lm,ll,lm,lm,lm,ll,lm,lm,lm,lm,lm,lm,lm,lm,lm,ll,lm,ll,lm,ll,lm	TGCAGGGTGGTGAGGGAGGGTGAAATATATACTTTTTTATGACCCACACAAACGTCTGGTTTCCTTTTCATTATACTCATTGCTTTAGACGTTTA	scaffold_322	100	95	0	0	1	95		188596	188690	1e-46	188
scf384.3	IV	90.006	<lmxll>,(ll,lm),ll,lm,ll,ll,lm,ll,ll,ll,lm,ll,lm,ll,ll,ll,lm,ll,ll,ll,ll,ll,ll,ll,ll,ll,lm,ll,lm,ll,lm,ll	TGCAGGAAGGCACTCCGCTGTGTGGTGCCGTTGCAGCCTATTGCGTCCGCCCCTCCTGCCTTTAGTGATTGTGTGTAAAATGCACTCCATTGACA	scaffold_384	98.95	95	1	0	1	95		111386	111480	2e-44	180
scf10524	IV	91.795	<nnxnp>,(nn,np),nn,nn,nn,np,np,nn,np,nn,np,nn,np,nn,np,np,nn,nn,nn,np,nn,np,np,np,nn,nn,np,nn,nn,np,np,np	TGCAGGCAGTGAGGGTTGTTTCAAAGCAAATAGTTTGTGAACGTGATTGCAAAGACAGAATCGTGTTGTCGCGTGTAAATTATGGTCAAAATGTT	scaffold_10524	100	95	0	0	1	95		2145	2051	1e-46	188
scf1386	IV	91.795	<hkxhk>,(hh,hk,kk),hk,kk,hk,hh,hk,HK,hh,hk,hk,hk,hk,hk,hh,hh,kk,hk,hk,hh,hk,hh,hh,hh,hk,hk,hk,hk,kk,hh,hk,hh	TGCAGGTGATTATCTCACATGGTGTATGCAGGCTCATGCCACAACACGTGGGCCTAATGGAATGCCGATGCTTTGCTGTGCTGAATGCCATTACG	scaffold_1386	97.89	95	2	0	1	95		19039	19133	6e-42	172
scf18969	IV	91.795	<hkxhk>,(hh,hk,kk),hk,hh,hk,kk,hk,hk,kk,hk,hk,hk,hk,hk,kk,kk,hh,hk,hk,kk,hk,kk,kk,kk,hk,hk,hk,hk,hh,kk,hk,kk	TGCAGGTGAGTCTCACAAGTACAGGGGTCCCTTATCTGCGTGACTCACCTAGCTAGGCCATGCATCGCAGCTACCACACACAATTAATGAGCTCT	scaffold_18969	100	95	0	0	1	95		14519	14425	1e-46	188
scf5773	IV	93.52	<efxeg>,(ee,ef,eg,fg),ef,ee,ef,fg,eg,ef,fg,fg,eg,ef,eg,ef,fg,fg,ee,ef,ef,fg,ef,fg,fg,fg,ef,ef,eg,ef,ee,fg,eg,fg	TGCAGGGAGCCAAGTGTGTGTCTATGTTTGCTTGGTTCTTTCGGTAAAGTCACGTAGAATGAGAATAAAATAATAAATTGATCAAATAAAATACC	scaffold_5773	98.95	95	1	0	1	95		9776	9870	2e-44	180
scf322.2	IV	95.244	<nnxnp>,(nn,np),nn,nn,nn,NP,NP,nn,NP,NP,np,nn,np,nn,np,NP,nn,nn,nn,NP,nn,NP,NP,NP,nn,nn,np,nn,--,NP,nn,NP	TGCAGGTGTGAGGGCACTCGGGTCTGCATTCCTTCTCCTCGGGGTACTGGTACCACTCCTCCTCGTCGAACCACGCCTGCACGTGGTAGGCAAGG	scaffold_322	98.95	95	1	0	1	95		82557	82651	2e-44	180
scf12064	IV	98.822	<hkxhk>,(hh,hk,kk),hk,hh,hk,kk,hk,hk,kk,kk,hk,hk,hk,HK,kk,kk,hh,hk,hk,hk,hk,kk,kk,kk,hk,hk,hk,hk,hh,kk,hk,kk	TGCAGGCGATATCGACGGCAGAACCAATTTAGGGGCAGCATTACCGCAGCACCGAGTCACGCGAGCTATCCTGTCTGACCAGAGAGCACCAAAAA	scaffold_12064	100	95	0	0	1	95		22	116	1e-46	188
scf558	IV	98.822	<lmxll>,(ll,lm),lm,ll,lm,lm,ll,lm,lm,lm,ll,lm,ll,lm,lm,lm,ll,lm,--,lm,lm,lm,lm,lm,lm,lm,ll,lm,ll,lm,ll,lm	TGCAGGAAACCCCATTCAAAACAGAGGGTCGGGACATACAAACTCCACACAGAAAGGCGCGCTGGTCACCAATCGAACCCAGCCAGGCCCTTCTT	scaffold_558	100	95	0	0	1	95		20951	21045	1e-46	188
21711	IV	100.547	<efxeg>,(ee,ef,eg,fg),ef,ee,ef,fg,eg,ef,fg,fg,fg,ef,eg,ef,fg,fg,ee,ef,ef,ef,ef,fg,fg,fg,ef,ef,eg,ef,ee,fg,eg,fg	TGCAGGCATATGGGTTACGGATGATGGGCTAGTGGTTTTAATTCAGCTTGTTCAAGGAAATAAATTAATCTTAATTTTTGGCTTGCATGGCTTGC
scf1035	IV	100.547	<hkxhk>,(hh,hk,kk),hk,kk,hk,hh,hk,hk,hh,hh,hh,hk,hk,hk,hh,hh,kk,hk,hk,hk,hk,hh,hh,hh,HK,hk,hk,hk,kk,hh,hk,hh	TGCAGGGATTATGTGAACCAATCACAAATGACTTAAAGAAAATAAAACGATATTAATGTATTTCATGGGTGATTCAATGTACCTATCATGTACAC	scaffold_1035	98.95	95	1	0	1	95		146873	146779	2e-44	180
scf1035.1	IV	100.547	<hkxhk>,(hh,hk,kk),hk,hh,hk,kk,HK,hk,kk,kk,kk,hk,hk,hk,kk,kk,hh,hk,hk,hk,hk,kk,kk,kk,hk,hk,hk,hk,hh,kk,hk,kk	TGCAGGCGCTGGATGGCCCGCATTCACGGCGATGTGAAATTAAAGGCGCCATCGCAAAATCAAATTTGCAAAACACAAGCTCAAATGACATTTAT	scaffold_1035	100	95	0	0	1	95		146870	146964	1e-46	188
scf1091.1	IV	100.547	<nnxnp>,(nn,np),nn,nn,nn,np,np,nn,np,np,np,nn,np,nn,np,np,nn,nn,nn,nn,nn,np,np,np,nn,nn,np,nn,nn,np,np,np	TGCAGGAAGTAGTCAAATGTAGTGCAGTAAGCAGGCTGCCAACCTATACGTGCAAAGTTTGAGCGTCTTCTCCTACCGTGAGTCGGTTTTCTCGG	scaffold_1091	98.95	95	1	0	1	95		44900	44994	2e-44	180
scf1812	IV	100.547	<hkxhk>,(hh,hk,kk),hh,hk,hh,HK,kk,hh,hk,hk,hk,hh,kk,hh,--,hk,hk,hh,hh,hh,hh,hk,hk,hk,hh,hh,kk,hh,hk,hk,kk,hk	TGCAGGAATCCGACGCGCACATCTCACGGGTCGTCTTTTCTTTTCCTCGCAGCTTATGACACCAAAAATGCCGCGAGCCCACGATGTGACATTTT	scaffold_1812	97.89	95	2	0	1	95		8149	8055	6e-42	172
scf1812.1	IV	100.547	<lmxll>,(ll,lm),--,ll,lm,lm,ll,lm,lm,lm,lm,lm,ll,lm,lm,lm,ll,lm,lm,lm,lm,lm,lm,lm,lm,lm,ll,lm,ll,lm,ll,lm	TGCAGGACCTCAATTCACGCACAACGACAAAGAGGGTCCGGCAATAAGAGACGAGTCGATGTATGCCGGGGTGGAAGTCGTGGAACCGCCGCTTG	scaffold_1812	100	95	0	0	1	95		58623	58529	1e-46	188
scf1812.2	IV	100.547	<nnxnp>,(nn,np),nn,nn,nn,np,np,nn,np,np,np,nn,np,nn,np,np,nn,nn,nn,nn,nn,np,np,np,--,nn,np,nn,nn,np,np,np	TGCAGGCTTTCGGTGCTGGATCGGCAGTCCCAATGCATTCTCCCCACAGACAACGCCCCTCTGGCCGGATTCAGGAAATACTTCAAGTCACAAAA	scaffold_1812	100	95	0	0	1	95		6452	6358	1e-46	188
scf25060	IV	100.547	<efxeg>,(ee,ef,eg,fg),eg,fg,eg,ee,ef,eg,ee,ee,ee,eg,ef,eg,ee,ee,fg,eg,eg,eg,eg,ee,ee,ee,eg,eg,ef,eg,fg,ee,ef,--	TGCAGGAGCCTATAACCCCTGTTTCACGTACGCTGGTCACCCATCCAAGTGCTCAGCTTTGCTATGCTTTTGAAATCTACGTGCCACTGGATCAC	scaffold_25060	96.84	95	3	0	1	95		63239	63333	1e-39	165
scf25060.1	IV	100.547	<hkxhk>,(hh,hk,kk),hk,hh,hk,kk,hk,hk,kk,kk,kk,hk,hk,hk,kk,--,--,hk,hk,hk,hk,kk,kk,kk,hk,hk,hk,hk,--,kk,hk,kk	TGCAGGGCTACGGTGTCAGCAAGGGAGGGCAATAGAGTACAGCAACATCCATTGTATTGTACTGTCCAATGACCATGTTCCGGCCCTTTACCAAC	scaffold_25060	98.95	95	1	0	1	95		63242	63148	2e-44	180
scf25060.2	IV	100.547	<hkxhk>,(hh,hk,kk),hk,hh,hk,--,hk,hk,kk,kk,kk,hk,hk,hk,kk,kk,hh,hk,hk,hk,hk,kk,--,kk,hk,hk,hk,hk,hh,kk,hk,--	TGCAGGCCGCATGGCCAAGATCCCCAACGGCCGAGAGCCGCACGATGTGCACTTGACGGTCATGCGGTCCGTTCTCTCGCGTCGGTTGGCTGTGG	scaffold_25060	100	95	0	0	1	95		7149	7243	1e-46	188
scf25060.3	IV	100.547	<hkxhk>,(hh,hk,kk),kk,hk,kk,hk,hh,kk,hk,hk,hk,kk,hh,kk,hk,hk,hk,kk,kk,kk,kk,hk,hk,hk,kk,kk,hh,kk,hk,hk,hh,hk	TGCAGGAGAAACAAAGACGACTCTGCTTCCCAGAGACCGCGAAAAGAAATGTAATTCAGTGAAACCATTTTGGATTCTTGACTGACTGCATCAAC	scaffold_25060	100	95	0	0	1	95		675389	675295	1e-46	188
scf25060.4	IV	100.547	<hkxhk>,(hh,hk,kk),hk,kk,hk,hh,hk,hk,hh,hh,hh,hk,hk,hk,hh,hh,kk,hk,hk,hk,hk,hh,hh,hh,hk,hk,hk,hk,kk,hh,hk,hh	TGCAGGGGCGGCGGGCGATCGGCAGAAGCGAACCAAGCAAAAGATTGGCGCCCCAAGCAGTTAGGGGTGCGCCGCGAATCACAAACAAATATGTA	scaffold_25060	100	95	0	0	1	95		604497	604403	1e-46	188
scf322.1	IV	100.547	<nnxnp>,(nn,np),nn,nn,nn,np,np,nn,np,np,np,nn,np,nn,np,np,nn,nn,nn,nn,nn,np,np,np,nn,nn,np,nn,nn,np,np,np	TGCAGGGGAAACCGTCGCACGAAGGGCTCATTTACCAACAGGCCGACTGCTTTTACGCCACGCAGGCATGGCGCACAAAGAAAACAACAGTAGGG	scaffold_322	98.95	95	1	0	1	95		227037	226943	2e-44	180
scf454	IV	100.547	<hkxhk>,(hh,hk,kk),hk,hh,hk,kk,hk,hk,kk,kk,kk,hk,hk,hk,kk,kk,hh,hk,hk,hk,hk,kk,kk,kk,hk,hk,hk,hk,hh,kk,hk,kk	TGCAGGGTTGGCAGGTGCAGAATCGCTCGTCGGTCTACATCGCACACACACGCCGTCGACAAGAGCCGGGTGTTTCGGTTCAAAAAATGGCACGT	scaffold_454	100	95	0	0	1	95		18749	18655	1e-46	188
scf505.1	IV	100.547	<lmxll>,(ll,lm),lm,ll,lm,lm,ll,lm,lm,lm,lm,lm,ll,lm,lm,lm,ll,lm,lm,lm,lm,lm,lm,lm,lm,lm,ll,lm,ll,LM,ll,lm	TGCAGGGCACAACAATACGTCTGAAGGGCGTTTCCCATATTCAGTTATGGACTCTCTCGACCGCGAGCCGTCTCTTCGCGTGCCTTTGTGCGTTC	scaffold_505	98.95	95	1	0	1	95		131515	131609	2e-44	180
scf5316	IV	100.547	<hkxhk>,(hh,hk,kk),hk,hh,hk,kk,hk,hk,kk,kk,kk,hk,hk,hk,kk,kk,hh,hk,hk,hk,hk,kk,kk,kk,hk,hk,hk,hk,hh,kk,hk,kk	TGCAGGCAGGAATGTGTACGGCGTCTATGGAGCTAAGCGCGGCAATTTCGTAGCTACAGCTGGAGACGCGATGGGATGGCAATGTGGACTGAGAG	scaffold_5316	100	95	0	0	1	95		1005	1099	1e-46	188
scf5529	IV	100.547	<lmxll>,(ll,lm),ll,lm,ll,ll,lm,ll,ll,ll,ll,ll,lm,ll,ll,ll,lm,ll,ll,ll,ll,ll,ll,ll,ll,ll,lm,ll,lm,ll,lm,ll	TGCAGGGACCATGATTGCTGCTAGGTCTAACCTCAATTGAGATGCAGCTCTATCTACCGTCTGGTGTTATCTCGTGCAGACGATGAACACCATGG	scaffold_5529	96.84	95	3	0	1	95		35949	36043	1e-39	165
scf262.1	IV	100.563	<nnxnp>,(nn,np),nn,nn,nn,np,np,nn,np,np,np,nn,np,nn,np,np,nn,nn,nn,nn,nn,np,np,--,nn,nn,np,nn,nn,np,np,np	TGCAGGGCCTCATCCAGCAGCTTCTCTTGTTCTTCCTGGGCAGATCCCTGTATCACAGACTAAAGTGTAAGCTAAACCCGCTCTGTGCCACCAGC	scaffold_262	98.95	95	1	0	1	95		35299	35205	2e-44	180
scf5529.1	IV	102.334	<lmxll>,(ll,lm),ll,lm,ll,ll,lm,ll,ll,ll,ll,ll,lm,ll,ll,ll,lm,ll,ll,ll,ll,ll,ll,ll,ll,ll,lm,ll,lm,ll,lm,ll	TGCAGGCAGAATAATGCCGCAGGTCACTCTTGCCAATGAGACTATCCTGGTCTGATGAGTTATCTTACCTGGTTAAAGAAAATTAACTTGAAACG	scaffold_5529	100	95	0	0	1	95		35952	35858	1e-46	188
scf2039	IV	104.122	<hkxhk>,(hh,hk,kk),hh,hk,hh,hk,kk,hh,hk,HK,hk,hh,hk,hh,hk,hk,hk,hh,hh,hh,hh,hk,hk,hh,hh,hh,--,hh,hk,hk,kk,hk	TGCAGGTTAATTGCTTTTTGTGTGGGCAATCTCCTTTCTTCCAGGAAATCTGAATCCCCCAGCTTTTGCACCAGTCAATCACAGCATTGTGCTTT	scaffold_2039	100	95	0	0	1	95		7024	7118	1e-46	188
scf293	IV	104.122	<hkxhk>,(hh,hk,kk),hh,hk,hh,hk,kk,hh,hk,hk,hk,hh,hk,hh,hk,hk,hk,hh,hh,hh,hh,hk,hk,hh,hh,hh,kk,hh,hk,hk,kk,hk	TGCAGGAATATACAGCACTGTACTAAACTCTGCAGCTCCTATTGGAGTTGCAAGGGAGATGCTTTGTTTTGGTGCCAATAGCTCCAGCGCGCCGG	scaffold_293	100	95	0	0	1	95		260431	260337	1e-46	188
scf293.1	IV	104.122	<nnxnp>,(nn,np),nn,nn,nn,np,np,nn,np,np,np,nn,nn,nn,np,np,nn,nn,nn,nn,nn,np,np,nn,nn,nn,np,nn,nn,np,np,np	TGCAGGCAGTGGAGAATATCTCTGAAGGAGAGGTGCTGTTTTCTGTGCCCCGGGATGCGTTGCTCAGCTCTGTGACTACCTCCATCAGCCAGGTC	scaffold_293	100	95	0	0	1	95		52763	52857	1e-46	188
scf361	IV	104.122	<nnxnp>,(nn,np),nn,nn,nn,np,np,nn,np,np,np,nn,nn,nn,np,np,nn,nn,nn,nn,nn,np,np,nn,nn,--,np,nn,--,np,np,np	TGCAGGCGTCCCTCCAGCGGTGGAGCCTCCTGGGCAGCAGGCAAGTCGCGACACATCCATTGCACGGCCGCTCTCTTCACCTCAGGCATCTCGCA	scaffold_361	100	95	0	0	1	95		137256	137350	1e-46	188
scf710	IV	104.122	<nnxnp>,(nn,np),nn,nn,nn,np,np,nn,np,np,np,nn,nn,nn,np,np,nn,nn,nn,nn,nn,np,np,nn,nn,nn,np,nn,nn,np,np,np	TGCAGGTCGTAAGGTCCCGGCTTCACCCAGTCCTGCACAGCGTCGTGGATGCAGGATGACGAGCTCAATATTGGCATCTGCTACTGGCTTAATAA	scaffold_710	100	95	0	0	1	95		87007	87101	1e-46	188
scf16013	IV	105.255	<lmxll>,(ll,lm),lm,ll,lm,lm,ll,lm,lm,lm,lm,lm,ll,lm,lm,lm,ll,lm,lm,lm,lm,lm,lm,lm,lm,lm,ll,lm,ll,lm,ll,LM	TGCAGGGTGCTGGCATCACAGTCCTAATTAAGTCACTTCTACAGATCTCTTTACCCACACCACATGCCATGTTAGATGCATCAATTCATATCCCT	scaffold_16013	98.95	95	1	0	1	95		2203	2109	2e-44	180
scf505	IV	106.388	<efxeg>,(ee,ef,eg,fg),ef,ee,ef,--,eg,ef,fg,fg,fg,ef,--,ef,fg,fg,ee,ef,ef,ef,ef,fg,fg,fg,ef,ef,--,ef,ee,fg,eg,fg	TGCAGGCGTTCACAAACTTCCTGCAAATGTTCTTTGGTTCCGCAGCGCTGGGAATACTCTTGGCGCTCATCTCCGCTCTCATATCCTTTTATTGC	scaffold_505	98.95	95	1	0	1	95		30697	30603	2e-44	180
scf16013.1	IV	112.218	<lmxll>,(ll,lm),ll,ll,lm,lm,ll,lm,lm,lm,lm,lm,ll,lm,lm,lm,ll,lm,lm,LM,lm,lm,lm,lm,lm,lm,--,lm,ll,lm,ll,lm	TGCAGGTGATCTGGTACAGTACGATGTACTGCTAGCTACAAAGGTTCCAAATTTAAAAAAAATCATCTCCATTAAGTTTGGTTTGAGAGTCCAAA	scaffold_16013	100	95	0	0	1	95		2200	2294	2e-32	141
scf18969.1	IV	113.491	<nnxnp>,(nn,np),nn,nn,nn,np,np,nn,np,nn,np,nn,np,nn,np,np,nn,nn,nn,np,nn,np,np,np,nn,nn,np,nn,nn,np,np,np	TGCAGGGGCAAACCGGTGCCTGTAATAGGCAAGTAGAGCAAGCTGGATTCGGATAAGGATATTGGTTTTGTGGGGGGTTGGTGGTCTTCACTGTT	scaffold_18969	98.95	95	1	0	1	95		14516	14610	2e-44	180
scf5477	IV	113.491	<nnxnp>,(nn,np),nn,nn,nn,np,np,nn,np,nn,np,nn,np,nn,np,np,nn,nn,nn,np,nn,np,np,np,nn,nn,np,nn,nn,np,np,np	TGCAGGCAAGTCCCACATTGAAATCACACGTCTTTGTTTTTTTCCGTTTCTCAACCCATTGTGACCTCCAGAGATAATAACACGAGAGATTAATC	scaffold_5477	98.95	95	1	0	1	95		5529	5623	8e-32	139
scf894.1	IV	113.491	<nnxnp>,(nn,np),--,nn,nn,np,np,nn,np,nn,np,nn,np,nn,np,np,nn,nn,nn,--,nn,np,np,np,nn,nn,np,nn,nn,np,np,np	TGCAGGTGTCTGCTTTGAGAACTTTCTCATTTGATTAAGTGTTTGTGGTGTGCGCTTCGGCTAGCGGTGGGGAGCGGCGGTGCAGCGGTTAGCGT	scaffold_894	100	95	0	0	1	95		88464	88370	1e-46	188
scf262	IV	118.049	<lmxll>,(ll,lm),ll,lm,ll,ll,lm,ll,ll,ll,ll,ll,lm,ll,ll,ll,lm,ll,ll,ll,ll,ll,ll,ll,ll,ll,lm,ll,lm,ll,lm,ll	TGCAGGCATTTGATCTGCTGCTCATGGCTCTACGAGACACATCAGAGCGTGTGCTGGCAGCAACTCACCAGACCTTCCTGCCGGCCTTTGGCCTG	scaffold_262	100	92	0	0	1	92		164049	164140	6e-45	182
scf505.2	IV	118.049	<lmxll>,(ll,lm),lm,ll,lm,lm,ll,lm,lm,lm,lm,lm,ll,lm,lm,lm,ll,lm,lm,lm,LM,lm,lm,lm,lm,lm,ll,lm,ll,lm,ll,lm	TGCAGGGTGAGTGATAAGTCCCCATGCCCCTTTACCACTGAGTGTAATAACAATCCTTTAAGACGCGGGTTTGCATGAACTTCCTGTCCACTCGA	scaffold_505	98.95	95	1	0	1	95		28478	28572	2e-44	180
scf603.6	IV	124.503	<nnxnp>,(nn,np),nn,--,nn,--,np,NP,np,nn,np,NP,--,nn,np,np,nn,nn,--,np,nn,nn,--,np,np,nn,NP,nn,nn,--,np,NP	TGCAGGACAATGGGCTCTCGCGGCTACACACGCACGCGCTCCATGCGTGTGCCCATCACCTCGAGAGCTTGTACCTGCAGCAGAACCACATCTCC	scaffold_603	100	95	0	0	1	95		284655	284749	1e-46	188
scf603.8	IV	124.503	<nnxnp>,(nn,np),np,np,np,nn,nn,nn,nn,np,nn,nn,nn,np,nn,nn,NP,np,np,nn,np,np,nn,nn,nn,np,nn,np,np,nn,nn,--	TGCAGGTGTTTTCTGTACTGCAGTGGCTGGGGATGCCAAGGCATTGGAACGCTGGACAGTCTCTACAGACTTTTGCCCGTTGCCTTCACGTGCTG	scaffold_603	100	95	0	0	1	95		225612	225706	1e-46	188
scf1045	IV	138.898	<nnxnp>,(nn,np),np,np,--,nn,nn,nn,nn,np,nn,nn,nn,np,nn,nn,np,nn,nn,nn,np,np,nn,nn,nn,np,--,np,--,nn,nn,nn	TGCAGGAGTCGGCGGGGGTGGGAGAAGGAGGAGAAAGTTGAGGCCAATGTCGCCACGAGGCCGAAGCCCTGGGGGGAATGTAACTCCTTGCAGCA	scaffold_1045	100	95	0	0	1	95		37252	37346	1e-46	188
scf11511.3	IV	138.898	<nnxnp>,(nn,np),np,np,nn,nn,nn,--,--,np,nn,nn,nn,np,nn,--,np,nn,nn,nn,--,np,nn,nn,--,--,--,np,nn,--,nn,--	TGCAGGGACCTGTTTCACGCACCGAGACAAGTGACAGGCAGAACTGTGGAAACGTGGCCCAGGATGAGGTTGGGAAACCCCAGAGGGCTTTAAAT	scaffold_11511	98.95	95	0	1	1	95		22478	22571	6e-42	172
scf117	IV	161.216	<efxeg>,(ee,ef,eg,fg),ef,ee,fg,fg,eg,ef,ef,ee,fg,eg,eg,ee,fg,ef,ee,eg,fg,fg,ef,ee,fg,fg,ef,ef,eg,ee,eg,ef,eg,ef	TGCAGGATCGCCAATTTTGAGCAAAGTTACTGACCGGACGCCGATTGAACGGCCACAGATCCGGACCAATGGCCGTCCCGACCGTGAGCGACGGA	scaffold_117	95.79	95	4	0	1	95		241994	242088	3e-37	157
scf2430	IV	161.216	<hkxhk>,(hh,hk,kk),hk,kk,--,hh,hk,hk,--,kk,hh,hk,hk,kk,hh,hk,kk,hk,hh,hh,hk,kk,hh,hh,hk,hk,hk,kk,hk,hk,hk,hk	TGCAGGCTGATGCTATCAGACATCATGGGTTGTTTGTTTAATGTTGAAATGTTTTAATCTACCTTGGCACATGACGATCATCATTGGAAACACTC	scaffold_2430	98.95	95	1	0	1	95		3449	3543	2e-44	180
scf11695	IV	164.803	<nnxnp>,(nn,np),nn,nn,np,np,np,nn,nn,nn,np,np,np,nn,np,nn,nn,np,np,np,nn,nn,np,np,nn,nn,np,nn,np,nn,np,nn	TGCAGGCAGGCAGCCAGTCCCACAATCCAGATGTGGAGTCGCAATCTGCAAGCTGGATTCCACCCATCCTCAATTCGTCTGACAACCAGATAGAT	scaffold_11695	100	95	0	0	1	95		656	562	1e-46	188
scf7552	IV	164.803	<lmxll>,(ll,lm),LM,lm,ll,ll,lm,ll,--,lm,ll,lm,lm,lm,ll,ll,lm,lm,ll,ll,ll,lm,lm,ll,ll,ll,lm,lm,lm,ll,lm,ll	TGCAGGACCGCCGGGAATTTGATGAGAAGCTCAGGAATTCCGAGAAGGAGCGCCAATCTCTTGAGGAGAAAGTCCGCAATTATGAGAGGGGCGTT	scaffold_7552	98.95	95	1	0	1	95		20555	20461	2e-44	180
scf10646	IV	168.39	<lmxll>,(ll,lm),ll,ll,lm,lm,ll,lm,lm,ll,lm,ll,ll,ll,lm,lm,ll,ll,ll,lm,lm,ll,ll,lm,lm,lm,ll,ll,ll,lm,lm,lm	TGCAGGCTGGATTGTGTGAGGAGCTCACAAATCCTTGAAATATCTGCGCAAGGTCCTAATCGGTGAGCTCCTCCGGCAGGCAAGGCTGCGTTGGC	scaffold_10646	96.77	93	2	1	3	95		6358	6267	5e-36	153
scf12046	IV	168.39	<lmxll>,(ll,lm),ll,ll,lm,lm,ll,lm,lm,ll,lm,ll,ll,ll,lm,lm,ll,ll,ll,lm,lm,ll,ll,lm,lm,lm,ll,ll,ll,lm,lm,lm	TGCAGGTCCCCTGGGGAAGTGCACAAATACATCTCTCGATCCTGTGGAAGTCATCATGGGCCCAACGCAGCGTCTTTTTTCTCCGCATCATACCC	scaffold_12046	98.95	95	1	0	1	95		6027	6121	2e-44	180
scf784	IV	168.39	<efxeg>,(ee,ef,eg,fg),eg,eg,ef,--,ee,fg,fg,eg,--,ee,ee,eg,ef,fg,eg,ee,ee,ef,fg,eg,ee,--,fg,fg,--,--,ee,fg,ef,fg	TGCAGGCTGGATTGTGTGAGGAGCTCACAAATCCTTGAAAGATCTGGACAAAGAGATGGAGTGACGTGGTACAGGAAGACGTGGGGCTGAGTGGA	scaffold_784	97.89	95	2	0	1	95		99802	99896	6e-42	172
scf15859.1	IV	170.115	<lmxll>,(ll,lm),ll,ll,lm,lm,ll,lm,LM,ll,lm,ll,ll,ll,lm,lm,ll,ll,ll,lm,lm,ll,ll,lm,lm,lm,ll,ll,lm,lm,lm,lm	TGCAGGAGATCAGGTTGTAATTGAGCATGTACCTTTTAAATTGTTTGTTCATGGCTGTCTCCATAATCTTGCTAATGATACCGAGCAGGGATATG	scaffold_15859	98.95	95	1	0	1	95		3114	3020	2e-44	180
scf15859.2	IV	170.115	<lmxll>,(ll,lm),ll,ll,lm,lm,ll,LM,LM,ll,lm,ll,ll,ll,lm,lm,ll,ll,ll,lm,LM,ll,ll,lm,lm,LM,ll,ll,lm,lm,LM,lm	TGCAGGAAGTTTGGATTCAGACCAGGTCACATCACAGCGGATCTTCTGAACAATCCTCTCTCAGAGGTGGAACACCTCGCTGGACAAGGGGGAAG	scaffold_15859	97.89	95	1	1	1	95		3111	3204	1e-39	165
scf18506	IV	170.115	<lmxll>,(ll,lm),ll,ll,lm,lm,ll,lm,LM,ll,lm,ll,ll,ll,lm,--,ll,ll,ll,LM,lm,ll,ll,lm,LM,--,ll,ll,lm,lm,lm,lm	TGCAGGACGCAGTGCGGGCGGACGCTGCAGCACAGTTATGCATTCCATCTTGAATACACATACGCGTGTGTGTGCGTGCGTGCGGCAGACGAGGG	scaffold_18506	100	93	0	0	3	95		1470	1562	2e-45	184
scf15859	IV	173.741	<lmxll>,(ll,lm),ll,ll,lm,--,ll,ll,lm,ll,--,ll,ll,ll,lm,lm,ll,ll,ll,lm,lm,ll,ll,ll,lm,lm,ll,ll,lm,lm,lm,lm	TGCAGGTCTTCATAGCAGTGGTTGGAGCGCGTTGTGTACAGCGGGCTGTGACAGCGGCAACTCGTCGACGGTGATGCAGGCTGCGGGTGGCGAGT	scaffold_15859	98.95	95	1	0	1	95		4096	4002	2e-44	180
scf117.2	IV	175.288	<nnxnp>,(nn,np),nn,nn,np,np,np,nn,nn,nn,np,np,np,nn,np,nn,nn,np,np,np,nn,nn,np,np,nn,nn,np,nn,np,nn,np,nn	TGCAGGTTTTACCGCTTCTCTTTCTGCTTCTTATCTTGCACTGCTCCATTTTGGAATTCCCACCCATCGTCTCTTTTCCTGACCGCTTAAAACTC	scaffold_117	100	95	0	0	1	95		178760	178666	1e-46	188
scf25018	IV	175.288	<nnxnp>,(nn,np),nn,nn,np,np,np,nn,nn,nn,np,np,np,nn,np,nn,nn,np,np,np,nn,nn,np,np,nn,nn,np,nn,np,nn,np,nn	TGCAGGGACCTGTTAAATCACCATCATCAGATTGACTAAGGCATTTTTCCTTAGAACCTCGGATTAGCACGGTTGGCTATGTACGGTGGGAAAGA	scaffold_25018	100	95	0	0	1	95		36754	36848	1e-46	188
scf256.3	IV	175.288	<nnxnp>,(nn,np),nn,nn,np,np,np,nn,nn,nn,np,np,np,nn,np,nn,nn,np,np,np,nn,nn,np,np,nn,nn,np,nn,np,nn,np,nn	TGCAGGCATCGCCAGCATGACACTCTTTACGATCATATGCGATGGCTGGCTGGATGAGGGCGATGCGCTCCTCCAGAATAGCGTGGTAGATCAGG	scaffold_256	100	95	0	0	1	95		576513	576419	1e-46	188
scf437.3	IV	175.288	<nnxnp>,(nn,np),np,np,nn,nn,nn,np,np,np,nn,nn,nn,np,nn,np,np,nn,nn,nn,np,np,nn,nn,np,np,nn,np,nn,np,nn,np	TGCAGGGCCACCACAACCCCGGCATGGGGATGTTCACCTGCGCTCACCCAGGCGTCTACTATTTCACGTTTTATGGCATCCCAGTGAACCTCGTG	scaffold_437	100	95	0	0	1	95		39709	39615	1e-46	188
53747	IV	182.186	<efxeg>,(ee,ef,eg,fg),ee,ee,fg,fg,eg,ef,ef,ee,fg,fg,eg,ee,fg,ef,ee,fg,eg,eg,ef,ee,eg,--,ef,ef,eg,ee,fg,ef,--,ef	TGCAGGAGTTTGCACATCAAGACGGGTCGATGTGTCCACAAAGTGACAGCCGTCTCCCTCGAACTAAGCTCCCGTGGCTAAGGAGACCGGTCGCA
scf2553	IV	182.186	<nnxnp>,(nn,np),nn,nn,np,np,np,--,nn,nn,np,np,np,nn,np,nn,nn,np,np,np,nn,--,np,np,nn,nn,np,nn,np,nn,np,nn	TGCAGGCAGTGTAGCCAGGCCCTGTCCCCAATGACCCACTGCTTGCCCGACACCTGACGGCCCCGCAAGCGCTCGTTGGCCTTCTGGTTAGCATC	scaffold_2553	100	95	0	0	1	95		57463	57557	1e-46	188
scf439	IV	182.186	<nnxnp>,(nn,np),nn,nn,np,np,--,nn,nn,nn,np,--,--,nn,np,nn,nn,--,np,np,nn,nn,--,np,nn,nn,--,nn,--,nn,--,nn	TGCAGGGAGAGTGAGCCCATCTCCCCTGGGGGCCCGGCCACAAGGACTTGATCAAATAATCTTTGGTTTTCGTTATCCCCATACACACATGCTCC	scaffold_439	100	95	0	0	1	95		444	350	1e-46	188
scf779.1	V	0	<lmxll>,(ll,lm),lm,lm,ll,lm,lm,lm,lm,ll,ll,lm,ll,ll,lm,lm,lm,ll,lm,ll,lm,lm,ll,lm,ll,ll,ll,ll,ll,ll,lm,ll	TGCAGGTGGTGTCCGAGCAATGCCCCGACGACGCAGCCGACACCTCAGGAGGGGGGAAGGGTCACTTCTTGTCTCGGGAGACGATTCCCGAGGAC	scaffold_779	98.95	95	1	0	1	95		221582	221676	2e-44	180
scf4786.1	V	3.45	<lmxll>,(ll,lm),lm,LM,ll,lm,lm,lm,lm,ll,ll,lm,lm,ll,lm,lm,lm,ll,lm,ll,lm,lm,ll,lm,ll,ll,ll,ll,ll,ll,lm,ll	TGCAGGTGAACAGCGGTGGTAGCATAAGGCGCAAGCAAACGAAGCAAAAGGCCTGCTTCGTGTTCATGAAACAAGTAAGGTTTAACCCAATATCA	scaffold_4786	100	95	0	0	1	95		5528	5434	1e-46	188
scf55.1	V	3.45	<hkxhk>,(hh,hk,kk),kk,kk,hk,kk,hk,kk,kk,hk,hh,kk,hk,hh,hk,kk,kk,hk,--,hh,hk,hk,hh,hk,hh,hh,hh,hh,hk,hh,kk,hk	TGCAGGAAATTCTAGCAACGATCACAATACCATCTGTTGTGAATGCCTCATTATTCCATAACAAAAAGGTAACAAATTATGAAAATTGTGTCCCT	scaffold_55	100	95	0	0	1	95		363578	363484	1e-46	188
scf779.3	V	3.45	<lmxll>,(ll,lm),lm,lm,ll,lm,lm,lm,lm,ll,ll,lm,lm,ll,lm,lm,lm,ll,lm,ll,lm,lm,ll,lm,ll,ll,ll,ll,ll,ll,lm,--	TGCAGGGAGAAACATATCTCAGTCGCTGCTAAGCACTGCCGAGGCAGCGCCAGGCGATTGTTGCAGCAGCGAGATTAGTTGAGCAATTTATGGGC	scaffold_779	98.95	95	1	0	1	95		463780	463686	2e-44	180
scf779.9	V	3.45	<lmxll>,(ll,lm),lm,lm,ll,lm,lm,lm,lm,ll,ll,lm,lm,ll,lm,lm,lm,ll,lm,ll,lm,lm,ll,lm,ll,ll,ll,ll,ll,ll,lm,ll	TGCAGGAGATGGGTGAGACGCGACGGCGGATGAGTAACCCTCGTCGGACTGCAGTTATCGCAACGCCTTTACGTATTTGTGTACGTGTGTTGAAC	scaffold_779	100	95	0	0	1	95		561260	561166	1e-46	188
scf249	V	5.192	<hkxhk>,(hh,hk,kk),kk,kk,hk,kk,hk,kk,--,hk,hh,kk,hk,hh,hk,kk,kk,hk,hk,hh,hk,hk,hh,hk,hh,hh,hh,hh,hk,hk,kk,hk	TGCAGGGCCATCCTGCTCATCATCCTCTTCTCGCAGTACCTGCGCAACACCTCCGTACCCGTGCCCGTGTATCGTCGCGGTCAGGGATGCTCCTC	scaffold_249	100	94	0	0	1	94		244312	244219	4e-46	186
scf3648	V	6.064	<nnxnp>,(nn,np),np,np,np,np,nn,np,np,np,nn,np,nn,nn,nn,np,np,np,nn,nn,nn,nn,nn,nn,nn,nn,nn,nn,np,nn,np,np	TGCAGGTGAACCGAGTCCGCGAGGCTTCACTGGATGACGGTGGCTTATCGTGGTTGTGGTGGACACGCGCGCCGGTGACAGGCACGCACATGCAC	scaffold_3648	100	95	0	0	1	95		49116	49210	1e-46	188
scf1540	V	6.935	<efxeg>,(ee,ef,eg,fg),fg,fg,eg,fg,ef,fg,fg,eg,ee,fg,ef,ee,ef,FG,fg,eg,ef,ee,ef,ef,ee,ef,ee,ee,ee,ee,eg,ee,fg,eg	TGCAGGGGATTAACAATGGATGTAAATTGTCGTTATTTATTATTTCTTTGTTCCTACAAAACAATCTGTATCGGGTTGTACTGCGTGTTGCTCGG	scaffold_1540	100	95	0	0	1	95		9274	9180	1e-46	188
scf1608.1	V	6.935	<nnxnp>,(nn,np),np,np,np,np,nn,np,np,NP,nn,np,nn,nn,nn,np,np,np,nn,nn,nn,nn,nn,nn,nn,nn,nn,nn,np,nn,np,np	TGCAGGTCTACTGCCCAAATTTTTGTTTCTGAGGCAGTGTTAACGATGAATGTGGCGAGTTTCATTCATATTTCTGCTTGTACACCATTGCCACC	scaffold_1608	100	95	0	0	1	95		14379	14473	1e-46	188
scf55	V	6.935	<hkxhk>,(hh,hk,kk),kk,kk,HK,kk,hk,kk,kk,hk,hh,kk,hk,hh,hk,kk,kk,hk,hk,hh,hk,hk,hh,hk,hh,hh,hh,hh,hk,hh,kk,hk	TGCAGGCAAAAGGAGGAAACACGCCCACGAGGTAGTGTACCGTAGAGATGGAGCAATGAAATAAGCTCATGCATGGGAAGTGTTCCATTGCAAGA	scaffold_55	100	95	0	0	1	95		363575	363669	1e-46	188
scf6272	V	6.935	<hkxhk>,(hh,hk,kk),hk,hk,hh,hk,kk,hk,hk,hh,hk,hk,kk,hk,kk,hk,hk,hh,kk,hk,kk,kk,hk,kk,hk,hk,hk,hk,--,hk,hk,hh	TGCAGGTGCCATGTTGAGATACAGTGGCGGTGCTGCTATCTAAACCTTGACGGATGCAATTGTGAAAACTTTAACGGCTGAAATATTATTTTTAT	scaffold_6272	100	95	0	0	1	95		10781	10875	1e-46	188
scf779.6	V	6.935	<lmxll>,(ll,lm),lm,lm,ll,lm,--,lm,lm,ll,ll,lm,lm,ll,lm,lm,lm,ll,lm,ll,lm,lm,ll,lm,ll,ll,ll,ll,ll,ll,lm,ll	TGCAGGTGAACTCGACGGCGCCGTCCCGGTCGCCCACGCCGAGGACGATTGGAGGCGCGCGATTTTGCGGGGGAGAGCGGCGGCGCGCTTCGACC	scaffold_779	100	95	0	0	1	95		553329	553235	1e-46	188
scf4390.1	V	7.797	<lmxll>,(ll,lm),LM,lm,ll,--,lm,lm,lm,ll,ll,lm,lm,ll,lm,lm,lm,ll,lm,ll,lm,lm,ll,lm,ll,ll,--,ll,ll,ll,lm,ll	TGCAGGCGCACCGACACCAGCTCCTGCGAGGGGGTGGATGAGGTCATTAGGTTCGGAGGTTGGCAAGGTTTGACCGAGTCAAAGTTCCGCTCGGC	scaffold_4390	100	95	0	0	1	95		10131	10225	1e-46	188
scf5003.1	V	7.797	<lmxll>,(ll,lm),lm,lm,ll,lm,lm,lm,lm,ll,ll,lm,lm,ll,lm,lm,lm,ll,lm,ll,lm,lm,ll,lm,ll,ll,ll,ll,ll,ll,lm,ll	TGCAGGGCAATGAGCCAGTACAACGACTAAGTGGCGAGATGTTAACTCCCTCGCCTGGTGTGCAGAAGGTCGTGGGTTCGATCCCGACCTTGATG	scaffold_5003	97.89	95	2	0	1	95		17862	17956	6e-42	172
scf779.5	V	7.797	<lmxll>,(ll,lm),lm,lm,ll,lm,lm,lm,lm,ll,ll,lm,lm,ll,--,lm,lm,--,lm,ll,lm,lm,--,lm,ll,ll,ll,ll,--,ll,LM,--	TGCAGGCTATTCAAACTTGCAAATGGGCACACAGGTTACAGCACTGAGATGTCACATTTCTGCACTGGTGGGAAATATTGGCATGGCTCTGCGGA	scaffold_779	97.89	95	2	0	1	95		559913	560007	6e-42	172
scf779.7	V	7.797	<lmxll>,(ll,lm),lm,lm,ll,lm,lm,lm,lm,ll,ll,lm,lm,ll,lm,lm,lm,ll,lm,ll,lm,lm,ll,lm,ll,ll,ll,ll,ll,ll,lm,ll	TGCAGGTGCCCGGCAGCACGGGGAGGGCTCGCTCGGAGTTCCTGCTGAGAGCGGTGTTAAAGCAACCCGCAGGTGCCCGGCAGAGTCTGCTTAAG	scaffold_779	100	95	0	0	1	95		625445	625351	1e-46	188
scf443	V	8.66	<hkxhk>,(hh,hk,kk),hh,hh,hk,hh,hk,hh,hh,hk,kk,hk,hk,kk,hk,hh,hh,hk,hk,kk,hk,HK,kk,hk,kk,kk,kk,kk,hk,kk,hh,hk	TGCAGGCTGCTTGGCCTCTTGCAGGTCTCTTAAAGCATTTGCATTCTTCCTGGGACACATGAACTCCTGACTTCAAACCCCTGACATAAAATATA	scaffold_443	98.95	95	1	0	1	95		295565	295659	2e-44	180
scf5003	V	9.522	<lmxll>,(ll,lm),LM,lm,ll,lm,lm,lm,lm,ll,ll,lm,lm,ll,lm,lm,lm,ll,lm,ll,lm,lm,ll,lm,ll,ll,ll,ll,ll,ll,lm,ll	TGCAGGTGGGTGACTCAGGCACACAATAGCTGCATCTCTGCCTGAGCCTCCAAATCCCACATTCAAACAGTGGATAAAGGCATTTACCACGTGTG	scaffold_5003	98.95	95	1	0	1	95		17865	17771	2e-44	180
scf779	V	9.522	<lmxll>,(ll,lm),lm,lm,ll,lm,lm,lm,lm,ll,ll,lm,lm,ll,lm,lm,lm,ll,lm,ll,lm,LM,ll,lm,ll,ll,ll,ll,ll,ll,lm,ll	TGCAGGAATCACGATATCTCTGTGGGCAATAACCATGAAAAAAATTTTATTCCCTTTTTTAGGATTCACAACATGGATTATGTCCCGGAAAAGAG	scaffold_779	100	95	0	0	1	95		202182	202088	3e-34	147
scf4390	V	10.385	<lmxll>,(ll,lm),lm,lm,ll,lm,lm,lm,lm,ll,ll,lm,lm,ll,lm,lm,lm,ll,lm,ll,lm,lm,ll,lm,ll,ll,ll,ll,ll,ll,lm,ll	TGCAGGGTTTCTCACCATTGTCCACAGTTCCACCAATCTGCTCCTTTCGACTACGCTGGGCACTCCCCATGACGAGGACCCATGTGTGTGTGCGC	scaffold_4390	100	95	0	0	1	95		9892	9798	1e-46	188
scf6253	V	10.385	<lmxll>,(ll,lm),ll,ll,lm,ll,--,ll,ll,lm,lm,ll,ll,lm,ll,--,ll,lm,--,lm,ll,ll,lm,ll,lm,lm,lm,lm,lm,lm,ll,lm	TGCAGGGTGGGTACACGTGTTGGGACGCCACGGTGGTCTGGAGATGTTACCTACCTTGCCTGGTATACAGGAGGTCGTGGGTTCGATCTCGATCA	scaffold_6253	100	94	0	0	1	94		19204	19111	4e-46	186
scf779.12	V	10.385	<nnxnp>,(nn,np),np,np,np,np,nn,np,np,NP,nn,nn,np,nn,nn,np,np,np,nn,nn,nn,nn,nn,nn,nn,nn,nn,nn,np,nn,np,np	TGCAGGCCCAATGCGGCCTGCGACTTTATTTCAGACAGCCCATGGCCTCATGATGCCTACCATTTCGACGCGGCCCGAAAACAATATTTATCTAT	scaffold_779	100	95	0	0	1	95		133393	133487	1e-46	188
scf805	V	10.385	<hkxhk>,(hh,hk,kk),kk,kk,hk,kk,hk,kk,kk,hk,hh,hk,kk,hh,hk,kk,kk,hk,hk,hh,hk,hk,hh,HK,hh,hh,hh,hh,hk,hh,kk,hk	TGCAGGGCCTTCACCTTCCCTCGTTTCTTTATGAGGTGGATAACCTTGGAGTTCTTGTCCCAGTTCTTATCATTTCCACCATCCACGGCCACTCC	scaffold_805	98.95	95	1	0	1	95		44355	44261	2e-44	180
scf9768	V	10.385	<lmxll>,(ll,lm),ll,ll,lm,ll,ll,ll,ll,lm,lm,ll,ll,lm,ll,ll,ll,lm,ll,lm,ll,ll,lm,ll,lm,lm,lm,lm,lm,lm,ll,lm	TGCAGGACATATCCCAGACACATCACCGTCAATGCCCCGTTTGGGCACCGTTCCTCACCGCATGCACGTTCATTAATTTCCTTACAATATGCCTG	scaffold_9768	100	95	0	0	1	95		1936	1842	1e-46	188
scf779.10	V	13.972	<nnxnp>,(nn,np),np,np,np,np,nn,np,np,np,nn,nn,np,nn,nn,np,np,np,nn,nn,nn,nn,nn,nn,nn,nn,nn,nn,np,nn,np,np	TGCAGGGACCTGTTAACAGGACAATGGGTAGCGACTTGAAATGCGTAAACCTAATTTAAACACTCGCACAAGGAAACCCTGAATAAATATGTTCA	scaffold_779	100	95	0	0	1	95		102901	102807	1e-46	188
scf779.11	V	13.972	<nnxnp>,(nn,np),np,np,np,np,nn,np,np,np,nn,nn,np,nn,nn,np,np,np,nn,nn,nn,nn,nn,nn,nn,nn,nn,nn,np,nn,np,np	TGCAGGCGACTCGATGGCGCTGTGTCTGGGTGCCAGCGTCAAATGTCTTTCACAGGGGTGTGATCTGTTAATGCCTTGTCGCACCGAGCAACTCA	scaffold_779	100	95	0	0	1	95		263406	263312	1e-46	188
scf805.1	V	13.972	<hkxhk>,(hh,hk,kk),kk,kk,HK,kk,hh,kk,kk,hk,hk,hk,kk,hh,hk,kk,kk,hk,hk,hh,hk,hk,hh,hk,hh,hh,hh,hh,--,hh,kk,hk	TGCAGGAAATAGTTTTACTGAAAAAATGCCATGGCGATGCACATTGCTTGCTCTACTTTTAATGTAACACACCCCTAGTATTGTTTTTGCTCCAA	scaffold_805	98.95	95	1	0	1	95		42726	42820	2e-44	180
scf2975.1	V	20.016	<lmxll>,(ll,lm),lm,ll,ll,lm,--,lm,lm,ll,ll,lm,lm,ll,lm,lm,lm,ll,lm,ll,lm,lm,ll,lm,ll,ll,ll,ll,ll,ll,lm,ll	TGCAGGAGCCAGGGACGTTGAATCGTTGGCGTTGCATCGTGAAACCGTAAAGGGATTTGGCAAGGGCATGCCTCCATCCAGCAGTGGATAAGACC	scaffold_2975	98.95	95	1	0	1	95		21592	21686	2e-44	180
9903	V	22.925	<efxeg>,(ee,ef,eg,fg),fg,fg,eg,ef,ef,fg,fg,eg,ee,ef,fg,ee,ef,fg,--,eg,ef,ee,ef,ef,ee,ef,ee,ee,ee,ee,eg,ee,fg,eg	TGCAGGGCGCTTTGCCCACACGCGAACGAGCGGCTGTGCGTCAGGGAAGCGGTGCATTCATGATTGCCAACGACTGATCATAATTCGCGAATGTG
scf207.7	V	22.925	<lmxll>,(ll,lm),lm,lm,ll,lm,lm,lm,lm,ll,ll,lm,lm,ll,lm,lm,lm,ll,lm,ll,lm,lm,ll,lm,ll,ll,ll,ll,ll,ll,lm,ll	TGCAGGCCGTAGGTCGCAATGGAAGCTCCGGCTTTGAGGCTGCACTGTGTAGCCAGCACAGTGAGGTTCCCGTGCTCGCAGTCTTGCGTCGCCAA	scaffold_207	98.95	95	1	0	1	95		720604	720698	2e-44	180
scf207.2	V	24.65	<hkxhk>,(hh,hk,kk),kk,kk,hk,hk,hk,kk,kk,hk,hh,hk,kk,hh,hk,kk,kk,hk,hk,hh,hk,hk,hh,kk,hh,hh,hh,hh,hk,hh,kk,hk	TGCAGGTGCGAGCCAGAGACAGACACGGCGTGCTCCGGTGAGTGAGGGGTGTCGCCGGGGTGTGTGTGCTGAACCAGCCATGATGTCCTGGCTCA	scaffold_207	98.95	95	1	0	1	95		290298	290392	2e-44	180
scf2975	V	25.936	<lmxll>,(ll,lm),lm,lm,ll,--,lm,--,--,ll,ll,--,lm,ll,--,--,lm,ll,lm,ll,--,lm,ll,--,--,ll,ll,ll,ll,ll,--,ll	TGCAGGCACACGAGCTGATTCCACTGCTCCGTCTCCGGAGGGGCGGGCGTTCTCTCTCCGGCGTGATCCGTATCGTGAGACCTCAGGCCATTATC	scaffold_2975	97.89	95	2	0	1	95		21595	21501	6e-42	172
scf1590	V	27.222	<lmxll>,(ll,lm),ll,ll,lm,ll,ll,ll,ll,lm,lm,ll,ll,lm,ll,ll,ll,lm,ll,lm,lm,ll,lm,ll,lm,lm,lm,lm,lm,lm,ll,lm	TGCAGGCTGTGCACAGACCGCTCTAATGGCTTTCGGCAACAGAGCATTCATCTTCATTAAGAGCTGCCCGTTGCAGGTTATTGAGCCAGATGCAG	scaffold_1590	98.95	95	1	0	1	95		36820	36914	2e-44	180
scf10276	V	29.812	<hkxhk>,(hh,hk,kk),hh,hh,hk,hk,hk,hh,hh,hk,kk,hk,hh,kk,hk,hh,hh,hk,hk,kk,HK,hk,kk,hk,kk,kk,kk,kk,hk,kk,hh,hk	TGCAGGCATGGGCGAGCGACTGGCGATGTTTGCTGACAGTGTTTGCGTGCTTACGTCGCGGTACAGCTCCTGCTTTTTGTGCGACTCGTACGCGG	scaffold_10276	98.95	95	1	0	1	95		16087	16181	2e-44	180
scf207.9	V	29.812	<lmxll>,(ll,lm),lm,lm,ll,lm,lm,lm,lm,ll,ll,lm,lm,ll,lm,lm,lm,ll,lm,ll,lm,lm,ll,lm,ll,ll,ll,ll,ll,ll,lm,ll	TGCAGGAGGTATGGCGCAACGACCCGCAGCAGCAGAACCAGGGCTCCCCAGTGGCTCTGGGCACACAAGAACCTTCTTCGTCGCACGAGCACGAG	scaffold_207	100	95	0	0	1	95		720607	720513	1e-46	188
scf779.2	V	29.812	<lmxll>,(ll,lm),lm,lm,ll,lm,lm,lm,lm,ll,ll,lm,lm,ll,lm,lm,lm,ll,lm,ll,lm,lm,ll,lm,ll,ll,ll,ll,ll,ll,lm,ll	TGCAGGTTTAATATGGCACGGGGCGTGTGCCATTTTCTATACTAAACTATCATCCATTAATTATTCGCTCACAAGTGCCCGCCCCATGATGCGGA	scaffold_779	100	95	0	0	1	95		559916	559822	1e-46	188
scf779.8	V	29.812	<lmxll>,(ll,lm),lm,lm,ll,lm,lm,lm,lm,ll,ll,lm,lm,ll,lm,lm,lm,--,lm,ll,lm,lm,ll,lm,ll,ll,ll,ll,ll,ll,lm,ll	TGCAGGGAAACATCCTGAAGAAGGTTCTCGAGGCGCTCAAGGATCTCATCACGGAGGCGTGTTGGGACATCAGTTCGACCGGCGTGAGCCTGCAG	scaffold_779	97.89	95	2	0	1	95		452572	452478	6e-42	172
scf207.3	V	31.537	<hkxhk>,(hh,hk,kk),HK,kk,hk,hk,hk,kk,kk,hk,hh,hk,kk,hh,hk,kk,kk,HK,hk,hh,hk,hk,hh,hk,hh,hh,hh,hh,hk,hh,kk,hk	TGCAGGGTACTACTCGTGGCGCAATGAGGAGAAAGGCTCCTGGTTTATCCAGTCGCTGTGCGAAGAGCTGCTGAGGAATAGCTCGCAGTTGGAGC	scaffold_207	98.95	95	1	0	1	95		290301	290207	2e-44	180
scf249.1	V	31.537	<lmxll>,(ll,lm),ll,ll,lm,ll,ll,ll,ll,lm,lm,ll,ll,lm,ll,ll,ll,lm,ll,lm,ll,ll,lm,ll,lm,lm,lm,lm,lm,lm,ll,lm	TGCAGGGACGCTGAGCGACACACCTCCATCACCATCATCATCGCCATCACATTAATCAAAATCCCATTGATTGATAGTAAATTTGCATTTGATAC	scaffold_249	97.89	95	2	0	1	95		248921	249015	6e-42	172
scf252	V	31.537	<lmxll>,(ll,lm),ll,ll,lm,ll,ll,ll,ll,lm,lm,ll,ll,lm,ll,ll,ll,lm,ll,lm,ll,ll,lm,ll,lm,lm,lm,lm,lm,lm,ll,lm	TGCAGGAGTCGTATTAATTGTCTCGACACCCAGAGGGGGATGATGGACTGAATCGATCCACAACCAGGATTTGAACTTGTAACCTTCCGTTTGCG	scaffold_252	100	95	0	0	1	95		73527	73433	1e-46	188
scf6253.1	V	31.537	<lmxll>,(ll,lm),ll,ll,lm,ll,ll,ll,ll,lm,lm,ll,ll,lm,ll,ll,ll,lm,ll,lm,ll,ll,--,ll,lm,lm,LM,lm,lm,lm,ll,lm	TGCAGGCGGCGCGCGTTTGTTGTCTGGTAGCTCCAGGCCACGGTGGGCAGTGGCTTGCCCGTGGCCGTGCATCGCACCGACACCTCTCGGCCCAC	scaffold_6253	97.89	95	2	0	1	95		19201	19295	6e-42	172
scf779.4	V	31.537	<lmxll>,(ll,lm),lm,lm,ll,lm,lm,LM,lm,ll,ll,lm,lm,ll,lm,lm,lm,ll,lm,ll,lm,lm,ll,lm,ll,ll,ll,ll,ll,ll,lm,ll	TGCAGGAGAGCGGTCGTGCGAAATACACATTGGGCTGGTGGGAAGAAGCTGGAATGTCCGAGGATAATTCTCAAAGCTCCGCAAAGATTCAAAAA	scaffold_779	97.89	95	2	0	1	95		221585	221491	6e-42	172
scf4786	V	34.762	<lmxll>,(ll,lm),lm,lm,ll,lm,lm,lm,lm,ll,ll,lm,lm,ll,lm,lm,lm,ll,lm,ll,lm,ll,ll,lm,ll,ll,ll,ll,ll,ll,lm,ll	TGCAGGGACCTGTTAAAGTCGCACAAAAAGAAAATGATTCCAGTGAGCCAACAGATGGCAGTGATTCCGTTAGTGACAGTGAAAGTCGTCCTACA	scaffold_4786	96.84	95	3	0	1	95		18588	18682	1e-39	165
scf529	V	40.525	<hkxhk>,(hh,hk,kk),HK,hh,hk,hk,hk,hh,HK,hk,kk,hk,hh,kk,hk,HK,hh,hk,hk,kk,hk,hk,kk,hk,HK,kk,kk,kk,hk,kk,hh,hk	TGCAGGCTAAATAAAGATTCTGAATCTAAAAAAAAACCGTAGCGTTCACAGCAAAACCGCAGCGATTTATTGAACACAATCACTTGAAAGTCGTG	scaffold_529	100	95	0	0	1	95		1330382	1330476	1e-30	135
scf1115.1	V	49.389	<nnxnp>,(nn,np),nn,nn,nn,np,np,nn,nn,nn,np,np,nn,np,np,np,nn,nn,np,np,np,np,np,np,np,nn,np,np,nn,np,nn,nn	TGCAGGTGGTGCGCCTGCCAGTCAACTTCAGTCAGTAAACCCAAGGCACCTGGGTCTGTCACGTGACCTCTTGTCAGCGAGCCTTTGAAAAATTC	scaffold_1115	100	95	0	0	1	95		37999	37905	1e-46	188
scf1115	V	57.377	<lmxll>,(ll,lm),lm,lm,ll,lm,lm,lm,lm,lm,ll,lm,lm,ll,lm,lm,lm,ll,lm,ll,lm,lm,ll,lm,ll,ll,ll,ll,lm,ll,lm,ll	TGCAGGAGCATTGTCATACACACAGACACAACGCTTGTTTATATGTGCACAAGGACGAAGACTTGCAAGCACACGCAAAACACAAGTCCCGATTG	scaffold_1115	100	95	0	0	1	95		37996	38090	1e-46	188
scf126	V	57.377	<hkxhk>,(hh,hk,kk),hk,hk,hh,kk,kk,hk,hk,hk,hk,kk,hk,hk,kk,kk,hk,hh,hk,hk,kk,kk,hk,hk,hh,hh,hk,hk,hk,hk,hk,hh	TGCAGGCCCATGAGGAATCGCTCAGCCAGAGCTCCGAAGCCACCGATCAATAGCATGGTCAGGATTCTCACCCGAGTGGTGGCCATCCCCAGGCA	scaffold_126	98.95	95	1	0	1	95		137497	137591	2e-44	180
scf126.1	V	57.377	<nnxnp>,(nn,np),np,np,np,nn,nn,np,np,np,nn,nn,np,nn,nn,nn,np,np,np,nn,nn,nn,nn,np,np,np,nn,nn,np,nn,np,np	TGCAGGGCAGTACTCAACACCTTCCTCCTTTTCTTCCTTTTCTGCACAGCACGTTCTTGAAACTGTATCTAACCCGTCTGCATCTGCGTCTGAAT	scaffold_126	100	95	0	0	1	95		211477	211571	1e-46	188
scf1296	V	57.377	<nnxnp>,(nn,np),np,np,np,nn,nn,np,np,np,nn,nn,np,nn,nn,nn,np,np,np,nn,nn,nn,nn,np,np,np,nn,nn,np,nn,np,np	TGCAGGTTCAATAGAGCAAAGCAGTGAGGTGATCACTGCAAGGGGGTCGTGTATTGTTTGTCGAACTTCGTACGCACCGAACGTAGCCAACCGTG	scaffold_1296	100	95	0	0	1	95		50652	50558	1e-46	188
scf2134	V	57.377	<lmxll>,(ll,lm),lm,lm,ll,lm,lm,lm,lm,lm,ll,lm,lm,ll,lm,lm,lm,--,lm,ll,lm,lm,ll,lm,ll,ll,ll,ll,lm,ll,lm,ll	TGCAGGTGCGCAAGTAACTCGCGCTGAGATGTGGTTTATGCAAACCTGTTTTCGTCTCCTGATTTTGTACGGAAATATACTTCTTGCCTTTAAAG	scaffold_2134	98.95	95	1	0	1	95		5049	5143	2e-44	180
scf2357	V	57.377	<hkxhk>,(hh,hk,kk),hk,hk,hh,kk,--,hk,hk,hk,hk,kk,hk,hk,kk,kk,hk,hh,hk,hk,kk,kk,hk,hk,hh,hh,hk,hk,hk,hk,hk,hh	TGCAGGCAATACAAACACAATTTGGGTTTAGAAAACGTCCGCTTCTGAATTTCGAAACACTGCGATCCTAAGTAGAGGCCCATCTGCCAGCAGTG	scaffold_2357	98.95	95	1	0	1	95		30725	30631	2e-44	180
scf244.1	V	57.377	<nnxnp>,(nn,np),nn,nn,nn,np,np,nn,nn,nn,np,np,--,np,np,np,nn,nn,nn,np,np,np,np,nn,nn,nn,np,np,nn,np,nn,nn	TGCAGGCCCTGCTTATTGAATTAATATGGCCCCAGCAGCAACTAAACACGGCCGTTGGTCACCTTCTATCTCTGGATTTAATCAAACGATTTCTA	scaffold_244	100	95	0	0	1	95		179438	179532	1e-46	188
scf244.2	V	57.377	<nnxnp>,(nn,np),nn,nn,nn,np,np,nn,nn,nn,np,np,nn,np,np,np,nn,nn,nn,np,np,np,np,nn,nn,nn,np,np,nn,np,nn,nn	TGCAGGGAGCTGAACCTCGGCTCATTCACCTCCCTCCAACACCCCCAGGGAAATGCAAATGAATTAATCATAAATACTATCAAACATTTACGTGA	scaffold_244	100	95	0	0	1	95		106727	106633	1e-46	188
scf244	V	60.344	<nnxnp>,(nn,np),nn,nn,nn,np,np,nn,nn,nn,np,np,nn,np,NP,np,np,nn,nn,np,np,np,np,nn,nn,nn,np,np,nn,np,nn,nn	TGCAGGCGCATAGCTCAGTGGTCATTTTACATGTTTGGCAGGTTGGGTTTGAGCGTCATTGCCATATGCTTGTTAGTCTTAGGGTTGCATCCTTA	scaffold_244	100	95	0	0	1	95		192963	193057	1e-46	188
scf12937	V	65.925	<lmxll>,(ll,lm),ll,ll,lm,ll,ll,ll,ll,ll,lm,ll,ll,lm,ll,ll,ll,lm,lm,ll,ll,ll,lm,ll,lm,lm,lm,LM,ll,lm,ll,lm	TGCAGGAGTGGAGAGGAGAGTGGAGATGGAGAGATCTTAGATTTGCACAGTATTTTTTTTCATGTGGTTTAGGTTTCACAGACTCACTGTCCTGA	scaffold_12937	100	95	0	0	1	95		8252	8346	2e-32	141
scf2008	V	65.925	<lmxll>,(ll,lm),ll,ll,lm,ll,ll,ll,ll,ll,lm,ll,ll,lm,ll,ll,ll,lm,lm,ll,ll,ll,lm,ll,lm,lm,lm,lm,ll,lm,ll,lm	TGCAGGTGATTAATTTAACGAGCGCGCATGCTGCGGCTCTGCCCTCGCCACTCGTCCGCCCACGCAGCTGCTCTACACACACGTACAAATCACAT	scaffold_2008	100	95	0	0	1	95		21055	20961	1e-46	188
scf220.1	V	70.046	<hkxhk>,(hh,hk,kk),hk,hk,kk,hh,hh,hk,hh,hk,kk,hh,hk,HK,hh,hh,hh,kk,--,hh,hh,hh,hk,kk,kk,kk,hk,kk,hk,hk,hk,--	TGCAGGCTTATGCTATCATTCTGGCCTCATTCAAGGCAGATGTCAAAGCAAATTGGACGAAGTGGCAGGTTGTGAATGTAAACCTCGCGTGTATT	scaffold_220	98.95	95	1	0	1	95		403688	403782	2e-44	180
scf220	V	79.593	<hkxhk>,(hh,hk,kk),hk,hk,hh,kk,kk,hk,hk,hk,hk,kk,hk,HK,hk,kk,kk,hh,hh,kk,kk,kk,hk,hk,hh,hh,hk,hk,hk,--,hk,hh	TGCAGGCAAACATGTCAACACGTGTTTTCCCCAAACAGTGCATCCCCTGACTTTCTCTCTTTATGGGTGTTAAATTTATACTTGCAGAATTACAA	scaffold_220	98.95	95	1	0	1	95		441623	441717	2e-44	180
scf220.3	V	79.593	<nnxnp>,(nn,np),nn,nn,nn,np,np,nn,nn,nn,np,np,nn,np,nn,np,NP,nn,nn,np,np,np,np,nn,nn,nn,np,np,nn,np,nn,nn	TGCAGGGCCCATATCTTTTTCACTCGGAAGGCCATTCCGTTTATAGGTTCCGAGCACGTGCAAACAATCACCTTTGTTGCGAGTCTCCTCACTGG	scaffold_220	100	95	0	0	1	95		393443	393349	1e-46	188
scf220.2	V	80.455	<lmxll>,(ll,lm),lm,lm,ll,lm,lm,lm,lm,lm,ll,lm,lm,ll,lm,lm,lm,ll,--,lm,lm,LM,ll,lm,ll,ll,ll,ll,lm,ll,lm,ll	TGCAGGGATTTTCGAAGTGACATAAGTAGGCACTGCAGAATAACATAGAAGTAAAACACTGTCCACCTAATGTAATTTGCTTTCAAAATACTGGC	scaffold_220	98.95	95	1	0	1	95		360284	360190	2e-44	180
5796	V	81.318	<efxeg>,(ee,ef,eg,fg),ef,EF,ee,fg,fg,ef,ef,EF,eg,fg,ef,eg,ef,fg,fg,ee,ee,fg,fg,ef,eg,ef,ee,ee,eg,eg,ef,eg,ef,ee	TGCAGGCAGGAAGGCCTCCTGCCAATGAACTCAACTGCTTGAGGGGATTCACAGAAATTGCACCGTATTCTTGGTTCTTTCGGTAAAGTCACGTA
24823	V	81.318	<efxeg>,(ee,ef,eg,fg),ef,ef,ee,fg,fg,ef,ef,EF,eg,fg,ef,eg,EF,fg,fg,ee,ee,fg,fg,ef,eg,ef,ee,ee,eg,eg,ef,eg,ef,ee	TGCAGGAACATGAGCACACAATTTTAGGGCTGCTTCTTTACCTTTTACCACCTTCACGATCTGCTAGGAAGTAAATGTTAAAGAACCTGGTGGCA
scf12937.1	V	81.318	<nnxnp>,(nn,np),np,np,np,nn,nn,np,np,np,nn,nn,np,nn,np,nn,nn,np,np,nn,nn,np,nn,np,np,np,nn,nn,np,nn,np,np	TGCAGGCTCTGCGTTAAGCCCTGTACGCTCCTATAGATCGCGGTTTATGGCGCTCGAATAGTTTTAAATGCGCTGTGGTGCGCCACAGATTACGG	scaffold_12937	100	95	0	0	1	95		8255	8161	1e-46	188
scf4579	V	81.318	<hkxhk>,(hh,hk,kk),hk,hk,hh,kk,kk,hk,hk,hk,hk,kk,hk,hk,hk,kk,kk,hh,hh,kk,kk,hk,hk,hk,hh,hh,hk,hk,hk,hk,hk,hh	TGCAGGGACCTGTTTATTATAAAGACATCGACACAGATATTCGATTTAAGCTGGAAGAACCCGATGAGTTATGAAGCACGTTTCACACGTGTTCA	scaffold_4579	100	95	0	0	1	95		10537	10631	1e-46	188
scf50.1	V	81.318	<hkxhk>,(hh,hk,kk),hk,hk,hh,kk,kk,hk,hk,hk,hk,kk,hk,hk,hk,kk,kk,hh,hh,kk,kk,hk,hk,hk,hh,hh,hk,hk,hk,hk,hk,hh	TGCAGGGACTGCAAGTGAACGAGTTTCGGGGCCTGATGTTTTGTGGAAGTAACCACACGTCCGCCTCCTTCACTTGTAACTCCACATCTGCAAGC	scaffold_50	97.89	95	2	0	1	95		636369	636275	6e-42	172
scf50.2	V	81.318	<hkxhk>,(hh,hk,kk),hk,hk,hh,kk,kk,hk,hk,hk,hk,kk,hk,hk,HK,kk,kk,hh,hh,kk,kk,hk,hk,hk,hh,hh,hk,HK,hk,hk,hk,hh	TGCAGGTGATTTAGTCATAGGCTATTGTACGCATAGCATACATACTTTGTACACAGATAAACTCGTTTCGTCCGGCAAGCTAAATGTTACGCTCG	scaffold_50	98.95	95	1	0	1	95		885792	885886	2e-44	180
scf5090	V	81.318	<hkxhk>,(hh,hk,kk),hk,hk,kk,hh,hh,hk,hk,hk,hk,hh,hk,hk,hk,hh,hh,kk,kk,hh,hh,HK,hk,hk,kk,kk,hk,hk,hk,hk,hk,kk	TGCAGGTCATACGACTCGCCTGCCCCCTTTTTCCTTGGGGAGAATGAGTCCCGCTGGCTAATTTCATAAATGACTTTACATCGCTGCCTACAGTA	scaffold_5090	100	95	0	0	1	95		326	420	1e-46	188
scf525	V	81.318	<lmxll>,(ll,lm),LM,lm,ll,lm,lm,lm,lm,lm,ll,lm,lm,ll,lm,lm,lm,--,ll,lm,lm,lm,ll,lm,ll,ll,ll,ll,lm,ll,lm,ll	TGCAGGGCACATGTTCGATACAGAATGGTCCTTGTTTGTAGCCATGGGTTTATTTCACGCATATTTTGGTTTATATTAAGGTACATCATGGGACC	scaffold_525	100	95	0	0	1	95		165313	165219	1e-46	188
scf617	V	81.318	<hkxhk>,(hh,hk,kk),hk,hk,kk,hh,hh,hk,hk,hk,hk,hh,hk,hk,hk,hh,hh,kk,kk,hh,hh,hk,hk,HK,kk,kk,hk,hk,hk,hk,hk,--	TGCAGGAACACATGGCTCTGGAGGAGTATGGAGGAATACTGGGAAATGCATTTTCCTGTTGAACAGGCTGCAAAATCAAAGATAAATATTTGTTT	scaffold_617	98.95	95	1	0	1	95		30982	31076	2e-44	180
scf617.1	V	81.318	<nnxnp>,(nn,np),np,np,np,nn,nn,np,np,np,nn,nn,np,nn,np,nn,nn,np,np,nn,nn,np,nn,np,np,np,nn,nn,np,nn,np,np	TGCAGGGCCGGACTAAGGTTCTTGTAGGCTCTAGGCAACTTGTTTTGCAGGCCCTCAGTGATAACTTTCCACAGTTGGTACAGCTGCCCCTTGTT	scaffold_617	100	95	0	0	1	95		30985	30891	1e-46	188
scf620	V	81.318	<hkxhk>,(hh,hk,kk),hk,hk,kk,hh,hh,hk,HK,hk,hk,hh,hk,hk,hk,hh,hh,kk,kk,hh,hh,hk,hk,hk,kk,kk,hk,hk,hk,hk,hk,kk	TGCAGGCTCCTGGAGACACCATGGCACATGAGGGCAAGCTTTGTCGTCTCGACTGTAAGGTAAGAGCTTTACGGATGGCTGCTTCTCTTTAATTC	scaffold_620	100	95	0	0	1	95		86183	86277	1e-46	188
scf620.1	V	81.318	<hkxhk>,(hh,hk,kk),hk,hk,kk,hh,hh,hk,hk,hk,hk,hh,hk,hk,hk,hh,hh,kk,kk,hh,hh,hk,hk,hk,kk,kk,hk,hk,hk,hk,hk,kk	TGCAGGAAGTGTGGGCGGAAGTTCTTCTCCTGGACCATGTCACTGTCGTCCCGGCTCTCCCGTGACTGAGAGCGTGGCCTGATGTTCACGTGACG	scaffold_620	100	95	0	0	1	95		86186	86092	1e-46	188
scf839	V	81.318	<efxeg>,(ee,ef,eg,fg),eg,eg,fg,ee,ee,eg,eg,eg,ef,ee,eg,ef,eg,ee,ee,fg,fg,ee,ee,eg,ef,eg,fg,fg,ef,ef,eg,ef,eg,fg	TGCAGGTGAGCACATCATACATCGACATTCGTACTGTGCGCACGAGAGAGGCGATTCGCAGCCAAATAGCGGGGCTTGGATCATGACGCCCAAAA	scaffold_839	100	95	0	0	1	95		24133	24039	1e-46	188
scf280	V	83.042	<hkxhk>,(hh,hk,kk),hh,hh,hk,hk,hh,hh,hh,hh,kk,hk,hh,kk,hh,hk,hk,hk,hk,hk,hk,hh,kk,hh,hk,hk,kk,kk,hh,kk,hh,hk	TGCAGGAACTGTGATTTTCATATGGTTTATTCCCATGGTAGAATTTCCAGTCATTTGAATGGGAATTTGGAAGATTCGTGCAATATAATTGTACT	scaffold_280	98.95	95	1	0	1	95		296209	296303	2e-44	180
scf4.1	V	84.767	<lmxll>,(ll,lm),lm,lm,ll,lm,lm,lm,lm,lm,ll,lm,lm,ll,lm,lm,lm,ll,ll,lm,lm,lm,ll,lm,ll,ll,ll,ll,lm,ll,ll,ll	TGCAGGGGGCCACAGCGCCAAGGTGCAGTCCTCCTCGCGCTGCTCCGCAGGGATAGCCTCCACGTGGTTTTGCTCTGGGCTCCCGGTCCCTGGGG	scaffold_4	98.95	95	1	0	1	95		569296	569390	2e-44	180
scf4.2	V	84.767	<lmxll>,(ll,lm),lm,lm,ll,lm,lm,lm,lm,lm,ll,lm,lm,ll,lm,lm,lm,ll,ll,lm,lm,lm,ll,lm,ll,ll,ll,ll,lm,ll,ll,ll	TGCAGGGGGACGCCGATGGAGAAGCACGCGCCTTGCCGACCTGTTGTCTGCGGCGACGGCGCTTGTGGCTGAGATTGAAATGGAAGAGCCGGATG	scaffold_4	100	95	0	0	1	95		569299	569205	1e-46	188
scf4.3	V	86.492	<lmxll>,(ll,lm),ll,ll,lm,ll,ll,ll,ll,ll,lm,ll,ll,lm,ll,ll,ll,lm,lm,ll,ll,ll,lm,ll,lm,lm,lm,ll,ll,lm,lm,lm	TGCAGGAAATTTGTGCCTATGTTAAAATAATGTATACCGGGAGACTTCGTTTAGTGCTCAAGATACGTTCCAAGAGAAGTGAGCACTAATCGAAT	scaffold_4	100	95	0	0	1	95		312636	312542	1e-46	188
41745	V	88.217	<efxeg>,(ee,ef,eg,fg),ee,ee,ef,eg,ee,ee,--,ee,fg,--,ee,fg,ee,eg,eg,ef,ef,--,eg,ee,fg,ee,ef,ef,fg,eg,ee,eg,ef,ef	TGCAGGCCTCGTGGTGGAGAGCGCCGCCCCTAATCACTTCCACCTTCCTGCGTGGTTTACGCAGAGCCCGCGGTAGCCACCCCGCCAGGCCCAGG
scf258	V	88.217	<efxeg>,(ee,ef,eg,fg),fg,fg,eg,ef,fg,fg,fg,fg,ee,ef,fg,ee,fg,ef,ef,eg,eg,ef,ef,fg,ee,fg,eg,eg,ee,ef,fg,ef,eg,eg	TGCAGGTTTTTGCAAACCCTCGCTATGCGCGAGTTCTGGCTTCGCGAGTGCCGCACATTCGCGCGTTACTAAATGTACACCAATTCCCTGTTGGC	scaffold_258	98.95	95	1	0	1	95		47594	47688	2e-44	180
scf6230	V	88.217	<efxeg>,(ee,ef,eg,fg),--,eg,fg,ee,--,eg,eg,eg,ef,ee,eg,ef,eg,ee,ee,fg,fg,ee,ee,eg,ef,eg,--,fg,ef,ee,eg,ee,fg,fg	TGCAGGCGTCACAAATTTGGGTGCTTACTTTGCGACTGGCTACAACACCTAGAAAAGTGGAATTTCCACCACTGTCTCAGGGCCACCAACCGAAT	scaffold_6230	100	95	0	0	1	95		4963	4869	1e-46	188
scf6230.1	V	88.217	<efxeg>,(ee,ef,eg,fg),eg,eg,fg,ee,eg,eg,eg,eg,ef,ee,eg,ef,eg,ee,ee,fg,fg,ee,ee,eg,ef,eg,fg,fg,ef,ee,eg,ee,fg,fg	TGCAGGAGATGATTGTTCGAATTAACCTAATATTTTAGCAGGCCGACCACTCTCAATGGTCCGACAATTTCCTCCACCTGCATTTCAATATAATT	scaffold_6230	100	95	0	0	1	95		4960	5054	1e-46	188
scf280.1	V	89.942	<nnxnp>,(nn,np),nn,nn,nn,np,nn,nn,nn,nn,np,np,nn,np,nn,np,np,nn,nn,np,np,nn,np,nn,NP,nn,np,np,nn,np,nn,nn	TGCAGGAATTGTCCAGGGTGAAATTGTAGGAATTTAATTAGATTCATGCAGGAATCGCTCACCTCTATTATTGCACATTGATACACACCATATGT	scaffold_280	100	95	0	0	1	95		296212	296118	1e-46	188
scf4.4	V	102.299	<nnxnp>,(nn,np),np,np,--,nn,np,np,np,np,np,nn,np,np,np,nn,nn,--,--,nn,nn,np,np,np,--,--,np,nn,np,np,--,--	TGCAGGGATTGTTAGACAGCACCAATTATGAAAACTGAGATTTGTTATGATGTAGGGAATACACCAACAGTTCACGTTAGTAATATATAAATCCA	scaffold_4	98.92	93	1	0	1	93		458224	458316	4e-43	176
scf4	V	111.624	<hkxhk>,(hh,hk,kk),hk,hk,kk,hh,hk,hk,hk,hk,hk,hh,hk,hk,hk,hh,hh,kk,kk,hh,hh,hk,hk,hk,kk,kk,hk,hh,hk,hk,kk,kk	TGCAGGTGATCTGTTGGTTACACATCTGGGAAAAAGCTCGCCATCAGTCGTACAAATTGTCCAACAGAGTAATGTGTGCAGGTTAATTGAGCTGA	scaffold_4	100	95	0	0	1	95		458227	458133	1e-46	188
1714	V	116.926	<efxeg>,(ee,ef,eg,fg),ef,ef,ef,fg,ef,ef,ef,ef,fg,fg,ef,eg,ef,fg,fg,ee,ee,fg,fg,ef,eg,ef,ee,ee,eg,fg,ef,fg,ee,ee	TGCAGGGAACAGTGCAGCAAGTAGGTATGCAACCTATTTAGCACAGCACTTGAGTGCTCTCCCCTCACACTGGTGGGGGCTTTATCCTGGCGCCG
scf1432.3	V	116.926	<lmxll>,(ll,lm),lm,lm,lm,lm,lm,lm,lm,lm,lm,lm,lm,ll,lm,lm,lm,ll,ll,lm,lm,lm,ll,lm,ll,ll,ll,lm,lm,lm,ll,ll	TGCAGGATGAATAGTTTTCACACTGACACTTCCGCGTTTACATTTCCACCACTGGGTACTTGTAGCGAGGCCAAGGCTCATTTGAATTGCTTTTG	scaffold_1432	96.84	95	3	0	1	95		8417	8323	1e-39	165
scf2008.1	V	116.926	<nnxnp>,(nn,np),np,np,np,nn,np,np,np,np,nn,nn,np,nn,np,nn,nn,np,np,nn,nn,np,nn,np,np,np,nn,nn,np,nn,np,np	TGCAGGTGTGCGAGTGTTCGCGCCGCTGCTTTAGAGCGCGTCTTAGAGCGGGTGCGGGGAAGCGATTAACCACCCGCCGGCGCGCATAATTGCGC	scaffold_2008	100	95	0	0	1	95		21052	21146	1e-46	188
scf1432.5	V	120.578	<lmxll>,(ll,lm),lm,lm,lm,lm,lm,lm,lm,lm,--,lm,lm,ll,lm,lm,lm,ll,ll,lm,lm,lm,ll,lm,ll,ll,ll,lm,lm,lm,ll,ll	TGCAGGTCGGCACAAGGTATTAAGAGGGATTTGCTAACTATAGCTAATCTGGAGGTTTGCTTGGGCACTGATACTGATGGGGAAGAACAAAAGCA	scaffold_1432	100	92	0	0	1	92		10654	10563	6e-45	182
scf3289	V	120.578	<lmxll>,(ll,lm),lm,lm,lm,lm,lm,lm,lm,lm,lm,lm,lm,ll,lm,lm,lm,ll,ll,lm,lm,lm,ll,lm,ll,ll,ll,lm,lm,lm,ll,ll	TGCAGGGCAGCGCTTAGCGCACTGCGCTACAAACCCAACATCCAAGCCGAGTTCGATTCACGTTTAACATCAGTGGCGAGTGATCTACGTGCACG	scaffold_3289	96.84	95	3	0	1	95		26059	26153	1e-39	165
scf4653	V	120.578	<lmxll>,(ll,lm),ll,ll,ll,ll,--,ll,ll,ll,ll,ll,ll,lm,ll,ll,ll,lm,lm,ll,ll,ll,--,ll,lm,lm,LM,ll,ll,ll,LM,lm	TGCAGGGCAGCACAAGGTGGCAGCCTGCAGCATTTTGCTGCAGACGGATATCCGGTTACCGATTACCGACTTTCACAAAATTTCAGGGGTGGCTG	scaffold_4653	100	95	0	0	1	95		5995	6089	1e-46	188
scf5553	V	122.505	<nnxnp>,(nn,np),np,np,nn,np,nn,np,nn,nn,np,np,nn,np,nn,np,np,nn,nn,np,np,nn,np,nn,nn,nn,np,np,nn,np,nn,nn	TGCAGGTGTGTCAACATGAACTGCAAGCTTTGGCAAGGCAGAGTCACAACAACAGTCCGAGACCACACCAAGACAATATAGTACCTCGATTACAT	scaffold_5553	100	95	0	0	1	95		3266	3360	1e-46	188
scf1432	V	124.23	<hkxhk>,(hh,hk,kk),kk,kk,hk,kk,hk,kk,hk,hk,kk,kk,hk,hk,hk,kk,kk,hh,hh,kk,kk,hk,hk,kk,hh,hh,hk,kk,hk,kk,hh,hh	TGCAGGGCTGTTCTCTATGCACAGCAGCAACAGCATCAGGGTCACTCGCACTGGACACCTCCGTGGCCAATGAGGCCTCCGCTGAGCATATCTGG	scaffold_1432	100	95	0	0	1	95		209690	209596	1e-46	188
scf1432.1	V	124.23	<hkxhk>,(hh,hk,kk),hh,hh,hk,hh,hk,hh,hk,hk,hh,hh,hk,hk,hk,hh,hh,kk,kk,hh,hh,hk,hk,hh,--,kk,hk,hh,hk,hh,kk,kk	TGCAGGGGTAGGAGAGCCTGTGTGCAGGGAATATAAAACCCACCCTTCCCACTGTTCATATTCTAACTGAAATGTATCAAGACGCGAATGTGCCG	scaffold_1432	100	95	0	0	1	95		216986	217080	1e-46	188
scf1432.2	V	124.23	<lmxll>,(ll,lm),lm,lm,lm,lm,lm,lm,lm,LM,lm,lm,lm,ll,lm,LM,lm,ll,ll,lm,LM,lm,ll,lm,ll,ll,ll,lm,lm,lm,ll,ll	TGCAGGTTACGTGATAGCTGGCCGGAGGCCCTTGCCTCCACAGTTTCTCCCTCGTGCCGAGCAGAGAGTGCATTCTCCACTTTTAGGCCTTGTTA	scaffold_1432	98.95	95	1	0	1	95		215241	215147	2e-44	180
scf3205	V	124.23	<nnxnp>,(nn,np),np,np,nn,np,nn,np,nn,nn,np,np,nn,np,nn,np,np,nn,nn,np,np,nn,np,np,nn,nn,np,np,nn,np,nn,nn	TGCAGGAAGTAGAACCTCCACGTGTGACTCTTTGGTTGTGTCCCAGAACTGGTGTTTGATGGCACAGGTTCACCCTGCTTCTTGATTTTCTAATT	scaffold_3205	100	95	0	0	1	95		26405	26311	1e-46	188
scf3205.1	V	124.23	<nnxnp>,(nn,np),NP,np,nn,--,nn,np,nn,nn,np,np,nn,np,nn,np,NP,nn,nn,np,np,nn,np,np,nn,nn,np,np,nn,np,nn,nn	TGCAGGCCGCGCCGCAGGACTGGGCGCGCCCTACAGACGCGTGGCCGAGCCTGCGCCTGAGTAGACTGTGCCGCCGCTTCGTGTCCATGGGTAAC	scaffold_3205	100	95	0	0	1	95		20565	20659	1e-46	188
scf6707	V	124.23	<nnxnp>,(nn,np),np,np,nn,np,nn,np,nn,nn,np,np,nn,np,nn,np,np,nn,nn,np,np,nn,np,np,nn,nn,np,np,nn,np,nn,--	TGCAGGTGTACGCGTGGTTACGCAACCTGCGTGGGGTTTTGGCTTCCGGGACCGTCGGTTCTCCGCGCGACCGTCCGCCGTCCCCAGTGCCACCG	scaffold_6707	100	95	0	0	1	95		10760	10666	1e-46	188
scf1432.4	V	125.955	<lmxll>,(ll,lm),lm,lm,lm,lm,lm,lm,lm,lm,lm,lm,lm,ll,lm,lm,lm,ll,ll,lm,lm,lm,ll,lm,ll,ll,ll,lm,lm,lm,ll,ll	TGCAGGGAAACTGAGAGCAGAAATACAGGCACACTGAAGCCTGACTTGACACTTATCAATAATATGAGCCAAAGGACCCACACCATATCTGTCAA	scaffold_1432	100	95	0	0	1	95		10651	10745	1e-46	188
scf662.1	V	125.955	<nnxnp>,(nn,np),np,np,nn,np,nn,np,nn,nn,np,np,nn,nn,nn,np,np,nn,nn,np,np,nn,np,np,nn,nn,np,np,nn,np,nn,nn	TGCAGGGCTTGATGTAATTTCTCACACACAAGCATACAGTGTTTTAAATTTTATAAATGTTGCAATTGAGGCACTGACTTATTGACTGTAACCTC	scaffold_662	100	95	0	0	1	95		167383	167289	1e-46	188
scf662.2	V	125.955	<nnxnp>,(nn,np),np,np,nn,np,nn,np,nn,nn,np,np,nn,nn,nn,np,np,nn,nn,np,np,nn,np,np,nn,nn,np,np,nn,np,nn,nn	TGCAGGTTTCTCCGCTGTTAACATTCGCCCATCTGTCTACGTGACTTTGCCCGAAAGAGCCATCGGAATAATCTTAGAGGAGCTACAACAACCAT	scaffold_662	100	95	0	0	1	95		142106	142200	1e-46	188
scf172.2	V	127.679	<hkxhk>,(hh,hk,kk),kk,kk,hk,kk,HK,kk,hk,hk,kk,kk,hk,hh,kk,kk,kk,hh,hh,kk,kk,hk,hk,kk,hh,hh,hk,kk,hk,kk,hh,hh	TGCAGGCGTCGAACGGACGCTGAGGACGGCTGGTATCTTCCACCGCTCCAGAAGAACTCTGATTCAATCCACCCCTCCGGCCCCCTTATGTCCCC	scaffold_172	97.89	95	2	0	1	95		116542	116448	6e-42	172
scf3099.1	V	127.679	<nnxnp>,(nn,np),np,np,nn,np,nn,np,nn,nn,np,np,nn,nn,np,np,np,nn,nn,np,np,nn,np,np,nn,nn,np,np,nn,np,nn,nn	TGCAGGGCTTTTTAGCGTATCTGAATACAGACCCTGCTCGTTCTTAAAACCCTCAGATCCTTGGAAGTAAAAAGAATCCCGTTAAGGCTGCCGCA	scaffold_3099	100	95	0	0	1	95		17681	17775	1e-46	188
scf3212	V	127.679	<nnxnp>,(nn,np),np,np,nn,np,nn,np,nn,nn,np,np,nn,nn,np,np,np,nn,nn,NP,np,nn,np,np,nn,nn,np,np,nn,np,nn,nn	TGCAGGAGGACTACACCAACTCGGATGTGGCTGTCTATGCCATTGACCCAATGACTAACCGTGCCATCTCCAGCAAGGAACTCTTCAAGTAATTC	scaffold_3212	100	95	0	0	1	95		28685	28591	1e-46	188
scf7878	V	127.679	<nnxnp>,(nn,np),np,np,nn,NP,nn,np,nn,nn,np,np,nn,nn,np,np,np,nn,nn,np,np,nn,np,np,nn,nn,np,np,nn,np,nn,nn	TGCAGGAGGCAGTACAGCAAATAAGTTTGAGTGTTCTTCATTTGCAAGTACAGGTCATTTTTAGCCAGGCATTCTGGTTATCTTCACACACATAC	scaffold_7878	100	95	0	0	1	95		4555	4461	1e-46	188
scf662	V	128.546	<lmxll>,(ll,lm),lm,lm,lm,lm,LM,lm,lm,LM,lm,lm,lm,ll,lm,lm,lm,ll,ll,lm,lm,lm,ll,lm,ll,ll,ll,lm,lm,lm,ll,ll	TGCAGGTGCAAGGCGTGTTCACGGTGACGCACGTGATCCTGCCGAAGCAGAAGGGCTCCTCCGACTCGTGCCTGACGGAGAACGAGGAGGAGCTC	scaffold_662	100	95	0	0	1	95		128807	128901	1e-46	188
scf946.1	V	128.546	<lmxll>,(ll,lm),--,ll,ll,ll,ll,ll,ll,ll,ll,ll,ll,lm,ll,ll,ll,lm,lm,ll,ll,ll,lm,ll,lm,lm,lm,ll,ll,ll,lm,lm	TGCAGGGGGAGAGCCAATTCCCAATGCGTTCCGTGCTTATTGAAGCTTGCACGCCCCTGGTCTACATCATCACGATCGCAATACCGTGGTTTGTT	scaffold_946	100	95	0	0	1	95		228383	228289	1e-46	188
scf172	V	129.413	<hkxhk>,(hh,hk,kk),hh,hh,hk,hh,hk,--,hh,hk,hh,hh,hk,kk,hh,hh,hh,kk,kk,hh,hh,hk,hk,hh,kk,kk,HK,hh,hk,hh,kk,kk	TGCAGGTAGAAGGCATGCTGGCAGGCGGAGAACCATGGCCACAGGAGAGTAAGACCTACGCGGAGAGTAAGTCGGGCACGACTGCGCTCAGCGCC	scaffold_172	98.95	95	1	0	1	95		104897	104991	2e-44	180
scf172.4	V	130.364	<nnxnp>,(nn,np),np,np,nn,np,nn,np,--,--,np,--,nn,nn,np,--,--,--,nn,--,np,--,np,np,nn,nn,np,np,nn,--,nn,--	TGCAGGGTGGAGCTGGAAACGATCGGCCAGAAAAAGTCTCCAAGGCGAGCATCTTCCCCAGCCCCATCGGGCAGCTGAAGAGATGAGTAGGTACG	scaffold_172	100	95	0	0	1	95		116539	116633	1e-46	188
scf3099	V	131.134	<nnxnp>,(nn,np),np,np,nn,np,nn,np,nn,nn,np,np,nn,nn,np,np,np,nn,nn,np,np,nn,np,np,nn,nn,np,np,nn,np,nn,nn	TGCAGGAAGACACCACTCAAAAAAAGTTAAACAACTCCCGTATTGTAGATGCACACCTAGCCCGTGGGTCCGCCGAATTTTCGAAGGTAGGAGTT	scaffold_3099	100	95	0	0	1	95		17684	17590	3e-34	147
scf3176	V	131.134	<nnxnp>,(nn,np),np,np,nn,np,nn,np,nn,nn,np,np,nn,nn,np,np,np,nn,nn,NP,np,nn,np,np,nn,nn,np,np,nn,np,nn,nn	TGCAGGGCTTTATTTCGACTGGGTTAATCTGGATCGGTGACCCACAAAACATTTACACACCCAACGCATCACGTTCAGTAAGCCTCACAACCATC	scaffold_3176	100	95	0	0	1	95		19157	19251	1e-46	188
scf1454.1	V	132.925	<lmxll>,(ll,lm),lm,lm,lm,lm,lm,lm,lm,lm,lm,lm,lm,ll,lm,lm,lm,ll,ll,LM,lm,lm,ll,lm,ll,ll,--,LM,lm,lm,ll,ll	TGCAGGGAGACCTACGCCTGCCATGGGAATGTGGAATTTACACAGCTTGCCGTGTAACCTATAATGGGGAATAGCGGCGTTAGTTTAAACGTTAG	scaffold_1454	98.92	93	1	0	1	93		213313	213221	4e-43	176
scf172.3	V	132.925	<lmxll>,(ll,lm),lm,lm,lm,lm,lm,lm,lm,lm,lm,lm,lm,ll,lm,lm,lm,ll,ll,lm,lm,lm,ll,lm,ll,ll,ll,lm,lm,lm,ll,ll	TGCAGGGACCTGTTATAAGAGTATAAAAGTGTGACGGAGTTTTCAGTTTAGTTTTCAGTTTATTTATTTTGGTATAGCTCTGTGAGCCATTCGGC	scaffold_172	100	95	0	0	1	95		28748	28654	1e-46	188
scf6865	V	132.925	<lmxll>,(ll,lm),lm,lm,lm,lm,lm,lm,lm,lm,lm,lm,lm,ll,lm,lm,lm,ll,ll,lm,lm,lm,ll,lm,ll,ll,ll,lm,lm,lm,ll,ll	TGCAGGGCACGGTATTCATCATATTATTACCGACGACTCGTGGCTGTACAAGTGATCCGATAGAAGTTTAGGAGTAACTCAATCGGATTACTTTG	scaffold_6865	98.95	95	1	0	1	95		5281	5187	2e-44	180
scf6403.1	V	134.712	<nnxnp>,(nn,np),np,np,nn,np,nn,np,nn,np,np,np,nn,nn,np,np,np,nn,nn,np,np,nn,nn,np,nn,nn,np,np,nn,np,nn,nn	TGCAGGGACATCGACAAACACACAATGAGGTTATCATTCTGGATTCAAAAGTGCTTCTAAAGAAGTCTTACTTGCTGATGTAGGGAGAGATATCT	scaffold_6403	100	95	0	0	1	95		13347	13253	1e-46	188
7076	V	136.437	<efxeg>,(ee,ef,eg,fg),--,eg,eg,eg,ee,eg,ee,eg,eg,eg,ee,ef,eg,eg,--,ef,ef,eg,eg,ee,ef,eg,ef,ef,fg,EG,ee,eg,ef,ef	TGCAGGGTGATGTTCCGCGGGGCCCCAACACTTTTGTTCGGTTTCGCATTCATCTCGCGTTTGGCAGTTCGGTTCCAAAAAGAAGCTCGCAGCAC
scf2870	V	136.437	<nnxnp>,(nn,np),np,np,np,np,nn,np,nn,np,np,np,nn,nn,np,np,np,nn,nn,np,np,nn,nn,np,nn,nn,np,np,nn,np,nn,nn	TGCAGGACTTACAATCATCGAGACAGTTGTTCCTATGGCTGTTCAACACGGAGTGCGTATTGTAATGCCACGTGGTCCGTACGGAGAGTGAAGTG	scaffold_2870	100	95	0	0	1	95		7422	7328	1e-46	188
scf6865.1	V	137.299	<lmxll>,(ll,lm),--,lm,lm,lm,lm,lm,lm,lm,lm,lm,--,ll,lm,lm,lm,ll,ll,LM,lm,lm,ll,lm,ll,ll,ll,lm,lm,lm,ll,ll	TGCAGGTGGCTCAGTGTGCTGGATCGAACGTTTCCCGTGTACCGTTTCTCTACAGCATCTTGAGATGCCGGGATCACCGCTTAGTTTAACACGTA	scaffold_6865	100	95	0	0	1	95		5278	5372	1e-46	188
scf1093	V	138.162	<efxeg>,(ee,ef,eg,fg),ef,ef,ef,ef,fg,ef,fg,ef,ef,ef,fg,eg,ef,ef,ef,eg,eg,ef,ef,fg,eg,ef,ee,eg,ee,ef,fg,ef,eg,eg	TGCAGGACCCGTTCAGTTGTCCAGACTGTTATTATAATATAATATAGGGCAGTCAGCGCAGAAACGCCACCCTCCCTCAGCATTTCGCTTGGGAG	scaffold_1093	100	95	0	0	1	95		92484	92390	1e-46	188
scf1432.6	V	138.162	<lmxll>,(ll,lm),lm,lm,lm,lm,lm,lm,lm,lm,LM,lm,lm,ll,lm,lm,lm,ll,ll,lm,--,lm,ll,lm,ll,ll,ll,lm,lm,lm,ll,ll	TGCAGGCCATATTCCCTGCCGTGTTCCATCTGAAAAAAATCATCTTAGAGTAAAAATATGAAAAGTTCTGAAAAGTGCTGGTATACAGGTTTGGT	scaffold_1432	98.95	95	1	0	1	95		8414	8508	8e-32	139
scf3916	V	143.528	<nnxnp>,(nn,np),np,np,np,np,nn,np,nn,np,np,np,nn,nn,np,np,np,nn,nn,nn,np,nn,nn,np,np,nn,np,NP,nn,nn,nn,nn	TGCAGGTAGTAAGTCGGGCCTTTTCACTTTTATTCTAGTCGATTGAAAGTCGTCATGGCAGTTTTTATTTATGCAGATATAAATATGGTGCATTA	scaffold_3916	98.95	95	1	0	1	95		9753	9847	2e-44	180
scf1102	V	148.894	<lmxll>,(ll,lm),ll,ll,ll,ll,ll,ll,ll,ll,ll,ll,ll,lm,ll,ll,ll,ll,lm,ll,ll,ll,lm,ll,lm,lm,ll,ll,ll,ll,lm,lm	TGCAGGAATTGTGATTCTTCTATGGGCAATTCCCATGTTAAACTCTCCATTCATTTGACCAGGATTCTGGTGGGGATTTTTCTACAGGCTCACGC	scaffold_1102	100	95	0	0	1	95		34724	34630	1e-46	188
scf223	V	148.894	<efxeg>,(ee,ef,eg,fg),fg,fg,fg,fg,fg,fg,ef,fg,fg,fg,ef,ee,fg,fg,ef,ef,ee,ef,fg,ef,ee,fg,eg,ee,fg,fg,ef,ef,ee,ee	TGCAGGGGAATAATGAATCATGATTACAGTCTGTTCTCCTATAACGCATGTTTTCATAACGCAAATTGGATATAACACAATTGAGTAAACGGAAC	scaffold_223	100	95	0	0	1	95		191724	191818	1e-46	188
19379	V	150.619	<efxeg>,(ee,ef,eg,fg),EG,eg,eg,eg,eg,eg,ee,eg,eg,eg,ee,ef,eg,eg,ee,ee,ef,ee,eg,ee,ef,eg,--,ef,eg,eg,ee,ee,ee,ef	TGCAGGGACAGGACAAAGATAACGATTCCCCCGTATAGCCTTAAACGGACTGTAAGGGCAAGTGCTGTCAGTGAGTATCTATGAAGGCCTGGCGT
scf8613	V	153.355	<lmxll>,(ll,lm),ll,ll,ll,ll,ll,ll,ll,ll,ll,ll,ll,lm,ll,ll,ll,ll,lm,ll,ll,ll,lm,ll,lm,LM,--,ll,ll,ll,lm,lm	TGCAGGATTATTTCCGAATTGCGCGGGCATCGATTGGAGGCCTTCATCGGCGTTTCTGATGGAAAAGTCGGCGGCCCTGCGGTCACCGGGCGGGG	scaffold_8613	98.95	95	1	0	1	95		4709	4803	2e-44	180
scf4072	V	156.104	<lmxll>,(ll,lm),LM,ll,ll,ll,--,ll,ll,ll,ll,ll,ll,lm,ll,ll,ll,ll,lm,ll,ll,ll,lm,ll,lm,lm,ll,ll,ll,ll,lm,lm	TGCAGGTCGATTCCGACCAGCTGGTTCGTTCGACTGACACAGACTGGCCTCAGGGGTACCTGATAGCGCGCCGGTTTCAGCCCGCACTGCTGACA	scaffold_4072	97.89	95	2	0	1	95		6724	6818	6e-42	172
scf1254	V	160.301	<nnxnp>,(nn,np),nn,nn,nn,nn,nn,nn,--,nn,nn,nn,nn,np,nn,--,--,--,--,--,nn,--,np,nn,nn,np,nn,nn,--,--,np,np	TGCAGGAGGCTAGGACACCTGCTTTGTGCCTGCTGGTCGCCCGCGCTAGACCAGGCCTCAAGCCCCGCTCAGCTTCCAGCTTATGATGAGAACCA	scaffold_1254	100	95	0	0	1	95		6666	6572	1e-46	188
scf2415	V	160.301	<nnxnp>,(nn,np),nn,nn,nn,nn,nn,nn,np,nn,nn,nn,nn,np,nn,np,np,np,np,np,nn,np,np,nn,nn,np,nn,nn,np,np,np,np	TGCAGGAATAACCAAATCGTTGTTGAAACATTGGCATAAAACCTCAAATCACTTACGCCGAGATGTTTTACCGTAAGGTAATCATTTTCATTTTG	scaffold_2415	98.95	95	1	0	1	95		5943	5849	2e-44	180
scf2415.1	V	160.301	<nnxnp>,(nn,np),nn,--,nn,nn,nn,nn,np,nn,nn,nn,nn,np,nn,np,np,np,np,np,nn,np,np,nn,nn,np,nn,nn,np,np,np,np	TGCAGGCATATGCCAGTTGCAGGTTTAACATCAATCAACATGTTTGACCTTGCCAAATGAGAAACTCAGTTGGTAGGGCAGCATGACTAGGAGGG	scaffold_2415	97.89	95	2	0	1	95		5940	6034	6e-42	172
scf2415.2	V	160.301	<nnxnp>,(nn,np),nn,nn,nn,nn,nn,nn,np,nn,nn,nn,nn,np,nn,np,NP,np,np,np,nn,np,np,nn,nn,np,nn,nn,np,np,np,np	TGCAGGTGCTAGACGGATCGCTATATCGGGGGGTCGTGAGAGATAGGCGACAGCATGCCGCACAGCCTTCATCCCATCGTGGATTGATAATGGCC	scaffold_2415	100	95	0	0	1	95		46600	46694	1e-46	188
scf952	V	160.301	<nnxnp>,(nn,np),nn,nn,nn,nn,nn,nn,np,nn,nn,nn,nn,np,nn,NP,np,np,np,NP,nn,np,np,nn,nn,np,nn,nn,np,np,np,np	TGCAGGCCATAGATGAAGTCAATATATTCATAACTAACTTTACTACCCGGCTTCGCCCAAGACTTGGATTCTTGTGTTGGATCAATACACGCCCT	scaffold_952	100	95	0	0	1	95		63507	63413	1e-46	188
scf452.3	V	164.969	<efxeg>,(ee,ef,eg,fg),ee,ee,ee,ee,ee,ee,eg,ee,ee,ee,ee,fg,ee,eg,eg,eg,eg,eg,ef,eg,fg,ee,ef,fg,eg,ee,eg,eg,FG,FG	TGCAGGCCACTCAGAGTCGCGCCGTCAATGTCACCCCTTCCTCTCCCGGGGTCTCGATATGAAGTTGCATTTAGTCACTTATACATTAAAATTAT	scaffold_452	98.95	95	1	0	1	95		88190	88096	2e-44	180
scf452.4	V	164.969	<efxeg>,(ee,ef,eg,fg),ee,ee,ee,ee,ee,ee,eg,ee,ee,ee,ee,fg,ee,eg,eg,eg,eg,eg,ef,eg,--,ee,ef,--,eg,ee,eg,eg,fg,fg	TGCAGGTCCAGGCCACCGATATCGACGAGGGCATCAACGGCAGAGTCTGGTACAGAATAATTTCAGGTGAAGCGTTTGTCTGCCCTGCTCCCCTC	scaffold_452	98.95	95	1	0	1	95		88187	88281	2e-44	180
scf452	V	166.694	<efxeg>,(ee,ef,eg,fg),eg,eg,eg,eg,--,eg,ee,eg,eg,ee,eg,ef,eg,ee,ee,ee,ee,ee,fg,ee,ef,eg,fg,ef,ee,eg,ee,ee,ef,ef	TGCAGGATAACGCTTCCGTTATCGCTTTCAGCTTGTAGACTGTGCATTCAGACCACTGCATCGGTGTGACTGACACTGCAACAGTGGCAATAAAT	scaffold_452	98.95	95	1	0	1	95		140472	140378	2e-44	180
scf452.1	V	166.694	<efxeg>,(ee,ef,eg,fg),ee,--,ee,ee,ee,ee,eg,ee,ee,eg,ee,fg,ee,eg,--,eg,eg,eg,ef,eg,fg,ee,ef,fg,EG,ee,eg,eg,fg,fg	TGCAGGGCGGCAATTAATTCCGCGTTATCGCTGCAGCAAACGTACAAAAGATGCCCTCCCTGTATGTATATACATTTGTTGAACTTCTTTTCGCA	scaffold_452	98.95	95	1	0	1	95		115779	115685	2e-44	180
scf452.2	V	166.694	<efxeg>,(ee,ef,eg,fg),eg,eg,eg,eg,eg,eg,ee,eg,EG,ee,eg,ef,eg,ee,ee,ee,ee,ee,fg,ee,ef,eg,fg,ef,ee,eg,ee,ee,ef,ef	TGCAGGCAAGCGCTTAACGCGATGCGAAGTGAAAGTGGTTTCCTGCTTTGACGAGCGCGCCAGGGTCGCATCTTTCGTTTATAGCCCTGAGTCAG	scaffold_452	98.95	95	1	0	1	95		140469	140563	2e-44	180
scf452.6	V	166.694	<lmxll>,(ll,lm),ll,ll,ll,ll,ll,ll,ll,ll,ll,ll,ll,lm,ll,ll,ll,ll,ll,ll,lm,ll,lm,ll,lm,lm,ll,ll,ll,ll,lm,lm	TGCAGGGCTGTTCTCGAGCACGTGCGCGGTTTGCGACGTCACGTTGAAGGTGGGCGTGTTGTCGTTGACGTCCAGCACGGTGACCCCGAGCCGCA	scaffold_452	98.95	95	1	0	1	95		102812	102718	2e-44	180
scf452.7	V	166.694	<nnxnp>,(nn,np),nn,nn,nn,nn,nn,nn,np,nn,nn,np,nn,np,nn,np,np,np,np,np,nn,np,np,nn,nn,np,np,nn,np,np,np,np	TGCAGGGAGACCGGACCAAGATAAGAGAAAGCCATTGTGCAATCACACATCAAAAGAAAATATTCCCCTGGATATCCTTTAAGAGACTGTTGGGG	scaffold_452	100	95	0	0	1	95		100858	100764	1e-46	188
36130	V	167.662	<efxeg>,(ee,ef,eg,fg),--,ee,ee,ee,ee,ee,eg,--,ee,eg,ee,fg,ee,eg,eg,eg,eg,eg,ef,eg,fg,ee,ef,fg,eg,ee,eg,eg,fg,fg	TGCAGGCCGCACGCCAGGGGAGACACGGATGCGGTGATGTCTCGTGCTGGCAGACGAGCGAAGGAAGCATCAGTGCACTGAGTTAGACTCCACGG
scf452.8	V	168.043	<nnxnp>,(nn,np),nn,nn,nn,nn,nn,nn,np,nn,nn,np,nn,np,nn,np,NP,np,np,np,nn,np,np,nn,nn,np,np,nn,np,np,np,np	TGCAGGATTCCGACATCATGATTGTGACCATTCTGGATGAAAACGATAACAGTCCGGTATTTTCTCAAGTCACGTACGAGGCAGAGATCCCGGAG	scaffold_452	100	95	0	0	1	95		100855	100949	1e-46	188
scf5406	V	168.043	<nnxnp>,(nn,np),nn,nn,nn,nn,nn,nn,np,nn,nn,np,nn,np,nn,np,np,np,np,np,nn,np,np,nn,nn,np,np,nn,np,np,np,np	TGCAGGCAAGGCTGCGTTGGCTGGGGCATGTAGCCCGCATGCCCAGCCACCGCGGGCCCAACAGCTTTAGTTCATATAACAACATGCTTCGGAAG	scaffold_5406	100	95	0	0	1	95		30516	30422	1e-46	188
scf452.5	V	168.424	<efxeg>,(ee,ef,eg,fg),ee,ef,ef,ef,ef,ef,fg,ef,ef,fg,ef,eg,ef,--,fg,fg,fg,fg,--,fg,eg,ef,ee,eg,fg,ef,fg,fg,eg,eg	TGCAGGCCGCACGCTAACACTGCAGTTGTATTTACCATTAAAAACACGCCATCTCCTTCACAAAGTAAGTTAAATATCCCGTGGCATCATACAAC	scaffold_452	98.95	95	1	0	1	95		291021	291115	2e-44	180
scf4320	VI	0	<lmxll>,(ll,lm),lm,ll,ll,lm,lm,ll,ll,lm,ll,ll,ll,ll,ll,ll,lm,ll,ll,ll,lm,ll,ll,ll,lm,ll,ll,lm,lm,ll,ll,lm	TGCAGGTACCTGTTCTACAGTAAGCGTGTTGACATTGCATTTTTATTTGATGGTTGGGGCTGAAACTTAGCCACAGGTTGACCATTGAATACTAA	scaffold_4320	100	95	0	0	1	95		240106	240200	1e-46	188
scf1316	VI	3.45	<hkxhk>,(hh,hk,kk),--,hk,hk,--,kk,kk,hk,hh,kk,kk,kk,kk,kk,hk,hk,kk,kk,kk,hh,kk,kk,kk,hk,hk,hk,hh,hk,hk,kk,hk	TGCAGGAGTTCAAGGTGCGTTTCGCTTGCCCTGCTCTACTAGCCTCGTCGTGATGGTGGTGGTAGTAGTTTGGTGGTGGATAGCGTAGTGGTTCG	scaffold_1316	100	95	0	0	1	95		46351	46257	1e-46	188
scf324	VI	3.45	<nnxnp>,(nn,np),np,np,np,np,nn,nn,np,np,nn,nn,nn,nn,nn,NP,nn,nn,nn,nn,NP,nn,nn,nn,nn,np,np,np,nn,np,nn,--	TGCAGGAGATGATTTGGGGTTATGCTGTGCAAAGTTTGGAAAACACTGCCTTGATGCAGGTTTCCAGACGCTGCTTGCAACGGCTGAGGAGTTTT	scaffold_324	98.95	95	1	0	1	95		375330	375424	2e-44	180
scf324.1	VI	3.45	<nnxnp>,(nn,np),np,np,np,np,nn,nn,np,np,nn,nn,nn,nn,nn,np,nn,nn,nn,nn,np,nn,nn,nn,nn,np,np,np,nn,np,nn,nn	TGCAGGTAATGCTTCTTCAATCTAGATTGAAAAGTGCATAGATCCAGTGATTTCCTAATATAGGAAGGAAGAGCGTTCCAGGTGGCTGCAGAAGC	scaffold_324	98.95	95	1	0	1	95		375333	375239	2e-44	180
scf369	VI	3.45	<nnxnp>,(nn,np),nn,nn,nn,nn,np,np,nn,nn,np,np,np,np,np,nn,np,np,np,np,nn,np,np,np,np,nn,nn,nn,np,nn,np,np	TGCAGGCCAGTTTCCTGAATCTGATTTGTCTGCCCCAATCGGTTGCCTTAAAACAATATTTCCTGCTCACAGCCACCATGGATGGGCCTGTGATC	scaffold_369	100	95	0	0	1	95		145660	145566	1e-46	188
scf34	VI	6.037	<lmxll>,(ll,lm),lm,ll,ll,lm,ll,ll,ll,lm,ll,ll,ll,ll,ll,ll,lm,ll,ll,ll,lm,ll,ll,ll,ll,ll,ll,LM,lm,ll,ll,lm	TGCAGGAATAATGCTAATGCATACGCGAGCTGCACAATCTTCCTAGAGATTATAGAGAAGCTGTTAATACAAATCTCTAAAGTACCAACCACATG	scaffold_34	100	95	0	0	1	95		1344573	1344479	1e-46	188
scf34.1	VI	6.037	<lmxll>,(ll,lm),lm,ll,ll,lm,ll,ll,ll,lm,ll,ll,ll,ll,ll,ll,lm,ll,ll,ll,lm,ll,ll,ll,ll,ll,ll,lm,lm,ll,ll,lm	TGCAGGCTATGCATGAGTGAAAGAAAGGCTAGGTGCTGATCGAGATTATCAGCACATACTTGCATCCCTCATTTGCTTGATGAAAATCCTGCTAT	scaffold_34	100	95	0	0	1	95		1344570	1344664	1e-46	188
scf34.2	VI	6.037	<lmxll>,(ll,lm),ll,lm,LM,ll,lm,lm,lm,ll,lm,lm,lm,lm,LM,lm,ll,lm,lm,lm,ll,lm,lm,lm,lm,lm,lm,ll,--,lm,lm,ll	TGCAGGAACAGTGGCTGATTCCTGTGCACGAGCGTGTCAGCTGCTGCTAAGCAATGGCGACCAACCGCCGATGGCACCGCGGAGACAATGAGCTG	scaffold_34	100	95	0	0	1	95		959062	959156	1e-46	188
scf509	VI	8.624	<hkxhk>,(hh,hk,kk),HK,hk,hk,hh,kk,kk,hk,hh,hk,kk,kk,kk,kk,hk,hk,kk,kk,kk,hh,kk,kk,kk,kk,hk,HK,hh,hk,hk,kk,hk	TGCAGGCGGATGGATTTAAACATTTGATTATTTACATGGAATGGAAGTCTATTAATGTTGTCGAGCAATCATATAAAATGGCAGTCATCATTCTA	scaffold_509	98.95	95	1	0	1	95		33866	33772	2e-44	180
scf509.1	VI	8.624	<lmxll>,(ll,lm),ll,lm,lm,ll,lm,lm,lm,ll,ll,lm,lm,LM,lm,lm,ll,lm,lm,lm,ll,lm,lm,lm,lm,lm,lm,ll,ll,lm,lm,ll	TGCAGGATTGGTAAATAAGTATCAATTTGTGGAGCAGCCAACAGTGGTTATACTCCACTGTAGGAATGTGGAATATCCACCATGTTTATATCGAC	scaffold_509	98.95	95	1	0	1	95		92679	92773	2e-44	180
scf648	VI	8.624	<lmxll>,(ll,lm),ll,lm,lm,ll,lm,lm,lm,ll,ll,lm,lm,lm,lm,lm,ll,lm,lm,lm,ll,lm,lm,lm,lm,lm,lm,ll,ll,lm,lm,ll	TGCAGGGGTTATCCCTTCCTTCCGCCACGCACACAACGGCATGTGCAGTGTTTCCTCACTCCACGTTGTGCACCCAGGGCCTGTTCAGATGCGTA	scaffold_648	98.95	95	1	0	1	95		79454	79548	2e-44	180
50364	VI	10.349	<efxeg>,(ee,ef,eg,fg),ef,eg,eg,fg,ee,ee,eg,eg,ef,ee,ee,ee,ee,eg,ef,ee,ee,ee,fg,ee,ee,ee,ee,eg,eg,fg,ef,eg,ee,ef	TGCAGGGTCACAAGGTGACTAGTCGATGGAAGAACAGCACGTAAGTTACCAATCTACGTGACAATGATTAAGCATTATCACATGTGTTCGCTCAT
scf15007	VI	10.349	<hkxhk>,(hh,hk,kk),hk,hk,hk,hh,kk,kk,hk,hk,hk,kk,kk,kk,kk,hk,hk,kk,kk,kk,hh,kk,kk,kk,kk,hk,HK,hh,hk,hk,kk,hk	TGCAGGAGTGGGTTAACAACCCTTCTGTGTTCAGTCAGGTTCTGCCGGCCTTTGCTTGTGCCAGCATCCCCATCTCCAAGATCTCCAACATCACA	scaffold_15007	97.89	95	2	0	1	95		525	619	6e-42	172
scf1649	VI	12.074	<hkxhk>,(hh,hk,kk),hk,hk,hk,kk,hh,hh,hk,hk,hk,hh,hh,hh,hh,hk,hk,hh,hh,hh,kk,hk,hh,hh,hh,hk,hk,kk,hk,hk,hh,hk	TGCAGGCACTGAGATATGAGAGAAGCCATCTGGGTTGGGTTCTCTAGGTACTTTGCCTGTGAACACATATATACAGAGACGGATAACTTGCTTGG	scaffold_1649	100	95	0	0	1	95		11615	11521	1e-46	188
scf1649.1	VI	12.074	<lmxll>,(ll,lm),lm,ll,ll,lm,ll,ll,ll,ll,lm,ll,ll,ll,ll,ll,lm,ll,ll,ll,lm,lm,ll,ll,ll,ll,ll,--,lm,ll,ll,lm	TGCAGGAGGAGCAGCACATCTTAGATAGAGCGAACAAGGCCCACATGGTGAGTTGAACTTGCGTGCATTCATGCATCACTTGTAAAGGTTGCTGT	scaffold_1649	100	95	0	0	1	95		11612	11706	1e-46	188
scf2525	VI	16.815	<nnxnp>,(nn,np),np,nn,np,nn,np,np,nn,nn,np,np,np,np,np,nn,np,np,np,np,np,np,np,np,np,nn,nn,nn,np,nn,np,np	TGCAGGTCATAACATATATGGTAAACTCACATGGCAGATTAAAACTTTATTTTCAGTATACAATACCAGCATAACGTTCGCTATTTGCTATTAAG	scaffold_2525	100	95	0	0	1	95		11390	11484	1e-46	188
scf200.3	VI	19.101	<nnxnp>,(nn,np),np,nn,np,nn,np,np,nn,nn,np,np,nn,np,--,nn,np,np,np,np,np,np,np,np,np,nn,nn,nn,np,nn,np,np	TGCAGGAATTTCCCAGCCCTAGTACAGACAAGGCAGTTGTAGGCAGTGTCAACATTGCCCTCCTTCACCATAAACAATCAATGACTGTCAAGCAA	scaffold_200	98.95	95	1	0	1	95		168471	168377	2e-44	180
scf21.2	VI	19.101	<nnxnp>,(nn,np),nn,np,nn,np,nn,nn,np,np,nn,nn,np,nn,nn,np,nn,nn,nn,nn,nn,nn,nn,nn,nn,np,np,np,nn,np,nn,nn	TGCAGGGAGCAAGGTGACGATTTGGCTTGGCTTTCATTGATTTTGTGTTGAATGTAATCCAAGTGACACCTGCTCCCGAAAGTCTTGACTTTATC	scaffold_21	100	95	0	0	1	95		114374	114468	1e-46	188
scf289	VI	19.101	<hkxhk>,(hh,hk,kk),hk,hk,kk,hh,kk,hk,hk,hk,hk,kk,hk,kk,kk,hk,hk,kk,kk,kk,hk,hk,kk,kk,kk,hk,hk,hh,hk,hk,kk,hk	TGCAGGATCAATCGGCTGCAGCTATCACTGATGCTTTCATTAATGGGTATGTGTTAGACAAGGGGGCCCCGGAACATCTCCTTATGGACCAAGGC	scaffold_289	95.79	95	4	0	1	95		22090	22184	3e-37	157
scf3088	VI	19.101	<lmxll>,(ll,lm),lm,ll,ll,lm,ll,lm,ll,ll,lm,ll,ll,ll,ll,ll,lm,ll,ll,ll,lm,lm,ll,ll,ll,ll,ll,LM,lm,ll,ll,lm	TGCAGGTGTGCGCATGTTTGCGCCGCTGCTGTAGTGTTAACCGTGGGGCGTGCGCATGTTAGAATACAAACCTCAGCAGGGGCGCGCGTGTTCGC	scaffold_3088	98.95	95	1	0	1	95		9829	9735	2e-44	180
scf200.2	VI	19.963	<nnxnp>,(nn,np),np,nn,np,nn,--,np,nn,nn,np,np,nn,--,--,nn,NP,--,--,--,np,np,--,--,--,nn,nn,nn,np,nn,--,np	TGCAGGAGGTAGTACAGCCAGTTTGTTGCCGATCACTCTCGATGTATTTGTAATTTAGATTCTCCCATCATTCATGTATGTTTTCTCTCGGTTCT	scaffold_200	98.95	95	1	0	1	95		52479	52573	2e-44	180
scf40.5	VI	19.963	<nnxnp>,(nn,np),np,nn,np,nn,np,np,nn,nn,np,np,nn,np,np,nn,np,np,np,np,np,np,np,np,np,nn,nn,nn,np,nn,np,np	TGCAGGTGGGACCACAGAACCACCCTGAGGGAGCACCTCAACCGGCGCGCCCCTCAGCTTGCCGGGCACACCAGACATACAGCCCTCGGGGATTG	scaffold_40	98.95	95	1	0	1	95		93555	93649	2e-44	180
11055	VI	20.826	<efxeg>,(ee,ef,eg,fg),ee,fg,ef,eg,ef,ee,fg,fg,ee,ef,fg,ef,ef,fg,ee,ef,ef,ef,ee,ee,ef,ef,ee,fg,fg,eg,ee,fg,ef,ee	TGCAGGGGCCATACAACAGCCCACCGTGACAGGTATTCTACTCCCACGAGCAGAAATATATTTCCCCTCGGCGTGGTGGGAAACGGCCCGAGGAT
scf21	VI	22.551	<hkxhk>,(hh,hk,kk),hh,kk,hk,hk,hk,hh,kk,kk,hh,hk,kk,HK,hk,kk,hh,hk,hk,hk,hh,hh,hk,hk,hk,kk,kk,hk,hh,kk,hk,hh	TGCAGGACATTTTAAATAGATTTGTTGGGATTACAATTCCTGATCCTCGACACAATTCAAATAATGTTCACGAACACGCAGGCACCACATTTCCA	scaffold_21	97.89	95	2	0	1	95		243420	243514	6e-42	172
scf2468	VI	23.413	<nnxnp>,(nn,np),np,nn,np,nn,np,np,nn,nn,np,np,nn,np,np,nn,np,np,np,np,np,np,np,np,np,nn,nn,nn,np,nn,np,np	TGCAGGGACCTGTTATATTTATGGAACTATTCGGTAGTTTTAGCTATAGTTTGATAAAGTGCCAAAACTGGTTTGTGCGTACTGCACGATGGTGG	scaffold_2468	100	95	0	0	1	95		22384	22290	1e-46	188
scf3358.1	VI	24.275	<hkxhk>,(hh,hk,kk),hh,kk,hk,hk,hk,hh,kk,kk,hh,hk,kk,hk,hk,HK,hh,hk,hk,hk,hh,hh,hk,hk,hk,kk,kk,hk,hh,kk,hk,hh	TGCAGGGACCTGTTATAATGTTGTATACCATTGAACACATTTACTGCATTCGGCCACATGCAGCCTGTTTACAAAGATATAATTTGCCCAGAGTA	scaffold_3358	100	95	0	0	1	95		13543	13449	1e-46	188
31116	VI	26	<efxeg>,(ee,ef,eg,fg),ee,fg,ef,eg,ef,ee,fg,fg,ee,ef,fg,ef,ef,fg,ee,ef,ef,ef,ee,ee,ef,ef,ef,fg,fg,eg,ee,fg,ef,ee	TGCAGGGCCTGCCGCTTGTGGCGAACTCGCAGGGCTCCTGACCTCCGGCTACGCGGGGGCACCAGCAAGGTGAGACACATGGCACGTTTAAACCT
scf21.1	VI	26	<lmxll>,(ll,lm),lm,ll,ll,lm,ll,lm,ll,ll,lm,ll,ll,ll,ll,ll,lm,ll,ll,ll,lm,lm,ll,ll,ll,ll,ll,lm,lm,ll,ll,lm	TGCAGGCTACATACGGTCCATGGAGCCCCTCCTGGTGGCCTGGTCTAAGCGTTGTCTATGGTGATGCGTGGGGTCATGATTAGCGCACAAACACG	scaffold_21	100	95	0	0	1	95		384655	384561	1e-46	188
scf3358	VI	26	<hkxhk>,(hh,hk,kk),kk,hh,hk,hk,hk,kk,hh,hh,kk,hk,hh,hk,hk,hh,kk,hk,hk,HK,kk,kk,hk,hk,hk,hh,hh,hk,kk,hh,hk,kk	TGCAGGGACCTGTTCCTATATCGCACATTTCCTATATCGCACATTTGACTGAGATTCCACACACATTTAACGAAGAATGTGGCCTACTTTTTCGT	scaffold_3358	98.95	95	1	0	1	95		2275	2369	2e-44	180
scf471	VI	26	<lmxll>,(ll,lm),ll,lm,lm,ll,lm,ll,lm,lm,ll,lm,lm,lm,lm,lm,ll,lm,lm,lm,ll,ll,lm,lm,lm,lm,lm,ll,ll,lm,lm,ll	TGCAGGATTTAGTCTGTATCTGTGCCCCATTTCAGTACAGTGAGGTCTCAGAGTACACGGGTTCAGAGTACGCGGACCCGCTCATACATCACCGA	scaffold_471	100	95	0	0	1	95		360508	360414	1e-46	188
scf200.4	VI	26.863	<nnxnp>,(nn,np),--,nn,np,nn,np,--,nn,nn,--,--,nn,np,np,nn,--,np,np,np,--,--,np,np,np,nn,nn,nn,--,nn,np,--	TGCAGGAATCATATTCGATTACCACCATTACACCCTGGATGGTGCCTGTAGGAATCCCGACTCTTAATTGGGTTATTCCCATGTGCAAATCTACA	scaffold_200	97.89	95	2	0	1	95		168468	168562	6e-42	172
scf40	VI	27.725	<efxeg>,(ee,ef,eg,fg),ef,eg,ee,eg,ee,ef,eg,eg,ef,ee,eg,ee,ee,eg,ef,ee,ee,ee,ef,ef,ee,ee,ee,eg,eg,fg,ef,eg,ee,ef	TGCAGGCCTAGTTCAGCTTTGACTCGCGACTGATACTGCCTGTGGTCAGGTGTCGAACTCAAGATACTTTATTTTTCATAGCGCGGTGTGGAAAT	scaffold_40	98.95	95	1	0	1	95		157647	157553	2e-44	180
scf40.1	VI	27.725	<lmxll>,(ll,lm),lm,ll,ll,ll,ll,lm,ll,ll,lm,ll,ll,ll,ll,ll,lm,ll,ll,ll,lm,lm,ll,ll,ll,ll,ll,lm,lm,ll,ll,lm	TGCAGGATGGCAACTAAACTGTGATCATACGAGAGTAAAACAACAGTGACTTGTAAAATACAACCAGTTAAACTAAAGAGCCGCCAAAACTGAGA	scaffold_40	98.95	95	1	0	1	95		112653	112747	2e-44	180
scf40.2	VI	27.725	<lmxll>,(ll,lm),lm,ll,ll,ll,ll,lm,ll,ll,lm,ll,ll,ll,ll,ll,lm,ll,ll,ll,lm,lm,ll,ll,ll,ll,ll,lm,lm,ll,ll,lm	TGCAGGGTACCACCATTCATTAACCCGCATTGATGAGATTGGTGAAGTATCCTTGAACAACTCCCATGACCGACACAGCATTGAGAGGGCTTCAT	scaffold_40	98.95	95	1	0	1	95		157644	157738	2e-44	180
scf1004.3	VI	28.587	<nnxnp>,(nn,np),nn,np,nn,np,nn,nn,np,np,nn,nn,np,nn,nn,np,nn,nn,nn,nn,nn,nn,nn,nn,--,--,np,--,nn,np,nn,nn	TGCAGGCAGATATCGCTGATAAACGATTGCTCCATCTCCGACTGCTCGACCACCTCTGGGTAGCTTGATTATGTGTGTGTGCCACTCCACCTACC	scaffold_1004	96.84	95	3	0	1	95		2091462	2091556	1e-39	165
scf1747.2	VI	28.587	<nnxnp>,(nn,np),np,nn,np,nn,np,np,--,nn,np,np,nn,np,np,nn,np,np,np,np,NP,np,np,np,np,nn,nn,nn,np,nn,np,np	TGCAGGCAATACATCAAGTAGGCTGCTGGTCTCCAATATAAATTAATTTTCTCAAAGGTATGATTGACTTCTCTCTGGGCATCATTGTTACATTC	scaffold_1747	97.89	95	2	0	1	95		69435	69341	6e-42	172
scf40.4	VI	28.587	<nnxnp>,(nn,np),nn,np,nn,np,nn,nn,np,np,nn,nn,np,nn,nn,np,nn,nn,nn,nn,nn,nn,nn,nn,nn,np,np,np,nn,np,nn,nn	TGCAGGAATGTGCTGGCAGAATTGAACAGCCTAAAATTCATCAACACGGACATAGGCCGCTGCCGGGCCTGGTTACGCCTGGCACTGAATGACAG	scaffold_40	100	95	0	0	1	95		76504	76410	1e-46	188
scf471.2	VI	28.587	<nnxnp>,(nn,np),np,nn,np,nn,np,np,nn,nn,np,np,nn,np,np,nn,np,np,np,np,np,np,np,np,np,nn,nn,nn,np,nn,np,np	TGCAGGACTCCTGATGAAACAGGCTGCATTTCATGCTGGATGATATGAATCTCTTGTTAGGACTGTCAGTAATGGGTTAATATTTGCTGCATGCA	scaffold_471	100	95	0	0	1	95		49884	49978	1e-46	188
scf200.1	VI	29.45	<hkxhk>,(hh,hk,kk),hh,kk,hk,kk,hk,hh,kk,kk,hh,hh,kk,hk,--,kk,hh,hk,hk,hk,hh,hh,hk,hk,hk,kk,kk,hk,hh,kk,hk,hh	TGCAGGGTAATTGCGATGTTTTTCTGGCATACAACCACGTTTGCGTCCAAGGATGTATGTCAACGATCTTCCCGTGTGGCCTCCACAGACTGCTG	scaffold_200	98.95	95	1	0	1	95		126212	126118	2e-44	180
scf1017	VI	31.175	<hkxhk>,(hh,hk,kk),hk,hk,kk,hk,kk,hk,hk,hk,hk,hk,hk,HK,kk,HK,hk,kk,kk,kk,hk,hk,kk,kk,kk,hk,hk,hh,hk,hk,kk,hk	TGCAGGGAACTTTTGGCCATGGTATACTTCATACAACAGTACAGGCCTTATCTCTATGGCAGGGATTTTGTTGTTCAGTATACACTGCGAGTGGA	scaffold_1017	100	95	0	0	1	95		56609	56515	1e-46	188
scf1004.1	VI	32.899	<efxeg>,(ee,ef,eg,fg),ee,fg,ef,fg,ef,ee,fg,fg,ee,ee,fg,ef,ef,fg,ee,ef,ef,ef,ee,ee,ef,ef,ef,fg,fg,eg,ee,fg,ef,ee	TGCAGGTCTCCATAGTTAATACTGCACATGCATAAACCATGAATATGCGCCGTCTCCTCCTTCACAGTGGATGTTAAAGATCCCGTGACGCCAAT	scaffold_1004	98.95	95	1	0	1	95		2059143	2059049	2e-44	180
scf200	VI	33.877	<efxeg>,(ee,ef,eg,fg),ee,fg,ef,fg,ef,ee,fg,fg,ee,ee,fg,ef,ef,fg,--,--,ef,--,ee,ee,ef,ef,ef,--,fg,--,ee,--,ef,ee	TGCAGGCGAGATGTCCGATATTTGGACATCATTTGTGAGAACACGGCACGCGTAATAATGCGTTGTAATGCTTCAGGACATTCCATGGGGGGTGG	scaffold_200	100	95	0	0	1	95		126209	126303	1e-46	188
scf1354	VI	34.595	<lmxll>,(ll,lm),lm,ll,ll,ll,ll,--,ll,ll,--,lm,ll,ll,ll,ll,--,ll,ll,ll,lm,lm,ll,ll,ll,ll,ll,ll,lm,ll,ll,--	TGCAGGTATAAACGCGCTGTGGTCCTAACACATCCGTGTGCCACTGCTCCCGTACCGCCGCCTCCCTCCAGCGCAGGTAGGGCGAGCGGGCACCT	scaffold_1354	100	95	0	0	1	95		60253	60347	1e-46	188
scf408.2	VI	34.595	<lmxll>,(ll,lm),lm,ll,ll,ll,ll,lm,ll,ll,lm,lm,ll,ll,ll,ll,lm,ll,ll,ll,lm,lm,ll,ll,ll,ll,ll,ll,lm,ll,ll,lm	TGCAGGGGCAGTACATTAAGTAGGCTTTTGACCTATCATTGGTGAGTATGAATGGGTTTCTTCTGCTCACCTGGTTATTCTACCAAAATTATTAT	scaffold_408	100	95	0	0	1	95		51197	51103	1e-46	188
scf767.1	VI	34.595	<lmxll>,(ll,lm),lm,ll,ll,ll,ll,lm,ll,ll,lm,lm,ll,ll,ll,ll,lm,ll,ll,ll,lm,lm,ll,ll,--,ll,ll,ll,lm,ll,ll,lm	TGCAGGTGGGTATCTCTTACACACGATGAGCTTTTGCCGTCCTGCCGACTCCACGTATCGATGACAGCCGTGTGCCGCAGTGGCTGACAATAATA	scaffold_767	98.95	95	1	0	1	95		29870	29964	2e-44	180
scf1747.1	VI	35.103	<nnxnp>,(nn,np),nn,np,nn,np,--,nn,np,np,nn,nn,np,nn,nn,np,nn,nn,nn,nn,nn,nn,nn,nn,nn,np,np,np,nn,np,nn,nn	TGCAGGCTGAGCCGGGCCTTCCCGCTTTCAGTGGAGTTCACCCTTTGGCGGATGGACCCCAAGCCGCCAATGCTACACAGATGGAGAGGCCTTGC	scaffold_1747	100	95	0	0	1	95		58420	58514	1e-46	188
scf21.3	VI	35.103	<nnxnp>,(nn,np),nn,np,nn,np,nn,nn,np,np,nn,nn,np,nn,nn,np,nn,nn,nn,nn,nn,nn,--,nn,nn,np,np,np,nn,np,nn,nn	TGCAGGGAGAAATAGCGATGGGGTGTGCAGAAACTGAGATAATTGATGTTGTTTGGGTTGGTAGTGAGTCTTAGTGCCAGCGAGAGCCTGCAAAC	scaffold_21	100	95	0	0	1	95		114377	114283	1e-46	188
scf40.3	VI	35.103	<nnxnp>,(nn,np),NP,nn,NP,nn,np,np,nn,nn,np,np,nn,np,np,nn,np,np,np,np,np,np,np,np,np,nn,nn,nn,np,nn,np,np	TGCAGGCACACGTAAGTTCCTTCAACCAATGCCTCAGGCAAATACTTTGTAGCCTATCTGCTGACATTTAGATTTTCAAATACTTTTCATTTTAG	scaffold_40	98.95	95	1	0	1	95		281545	281639	2e-44	180
scf1747	VI	36.329	<hkxhk>,(hh,hk,kk),--,kk,hk,kk,hk,hh,kk,kk,hh,hh,kk,hk,hk,kk,hh,hk,hk,hk,hh,HK,hk,--,hk,kk,kk,kk,hh,kk,hk,hh	TGCAGGGAAAGTTTATGGAGCCTTCAGTTACCAAGTGGGACCTTGGTGTCTTGTTGAACAGCAATATCAGCAACTGTACTTTAACGTGGATGCCA	scaffold_1747	100	95	0	0	1	95		78377	78283	1e-46	188
scf471.1	VI	36.329	<nnxnp>,(nn,np),np,nn,np,nn,np,np,nn,nn,np,np,nn,np,np,nn,np,np,np,np,np,np,np,np,np,nn,nn,nn,np,nn,np,np	TGCAGGCTTGCATGTACGATTTGCAAGAACACAATTTCATGCTTAGAAAACATGTTCCAAATGCATCATTATCAAGATAGGGTTGAAAGTCTTGC	scaffold_471	98.95	95	1	0	1	95		49887	49793	2e-44	180
scf6716	VI	36.329	<nnxnp>,(nn,np),np,nn,np,nn,np,np,nn,nn,np,np,nn,np,NP,nn,np,np,np,np,np,np,np,np,np,nn,nn,nn,np,nn,np,np	TGCAGGCGATTATTGTATCGAGCGCTCATGCTGTGGCTCTGCCCTCACTCTCACCGCTCGTCCGCCCACGCAGCCGCTTCACACACACATACAAA	scaffold_6716	98.95	95	1	0	1	95		2485	2391	2e-44	180
scf408.1	VI	38.893	<lmxll>,(ll,lm),ll,lm,lm,lm,lm,ll,lm,lm,ll,ll,lm,lm,lm,lm,ll,lm,lm,lm,ll,ll,lm,lm,lm,lm,lm,lm,ll,lm,lm,ll	TGCAGGGAGAGACGGGTCCGTCTCGCTCGTCCCATTTCCCCACAAACTCGTCAAGGCGCATAAAACAGCACGCGTACTCGGGTCATCATCGCAGC	scaffold_408	100	95	0	0	1	95		258552	258646	1e-46	188
scf749	VI	38.893	<efxeg>,(ee,ef,eg,fg),ef,eg,ee,eg,ee,ef,eg,eg,ef,ef,eg,ee,ee,eg,ef,ee,ee,ee,ef,ef,ee,ee,ee,eg,eg,--,--,eg,ee,ef	TGCAGGAAACGCACGGAGAATAGCGAGAGAAGCGTACAAATTAATGCAGAAATGCGGCCGAATTTGGAGGAGAATCGAACAGAGGTTCTTGTCGC	scaffold_749	97.89	95	2	0	1	95		25482	25388	6e-42	172
scf408.4	VI	39.325	<lmxll>,(ll,lm),ll,lm,lm,lm,lm,ll,lm,lm,--,ll,lm,LM,lm,lm,ll,lm,--,lm,ll,ll,lm,lm,lm,--,lm,lm,ll,LM,lm,ll	TGCAGGCTCGACAGCTAAGCAAACAATTCCTGGTTATTTATAATGCATAAAGGTGGGTGGTTTGGTAATTAGCCAAGCAAAGTCCACATCAGGTG	scaffold_408	100	95	0	0	1	95		771287	771381	1e-46	188
scf1297.3	VI	39.758	<nnxnp>,(nn,np),NP,nn,np,nn,np,np,nn,nn,np,np,nn,np,np,nn,np,np,np,np,np,np,np,np,np,nn,nn,nn,nn,nn,np,np	TGCAGGAATGGCTCCTCTCCGTCCTCAGGACTGTCTGAGCACCCACGAGTGTGAGGCCCTGGGTCGCTGTGTTCGAGGGGTTTAAAAGAACTCCC	scaffold_1297	100	95	0	0	1	95		16527	16433	1e-46	188
scf408	VI	39.758	<efxeg>,(ee,ef,eg,fg),eg,ef,fg,ef,fg,eg,ef,ef,eg,eg,ef,fg,fg,ef,eg,fg,fg,fg,eg,eg,fg,fg,fg,ef,ef,ef,ee,ef,fg,eg	TGCAGGTCGTTGATGATAGTGGTGGTGGTTGAACACTAGATGAGACGACAAACTCCGTCTGGTAGATGGAGTCCTCAACGTTGGTTCGGTTTGGC	scaffold_408	100	95	0	0	1	95		341368	341274	1e-46	188
scf408.5	VI	39.758	<nnxnp>,(nn,np),np,nn,np,nn,np,np,nn,nn,np,np,nn,np,np,--,np,np,np,np,np,np,np,np,np,--,nn,nn,nn,nn,np,np	TGCAGGCAGTGAAGTCCTTTTCGAAGGCAGTACAACAAGTGGGTCGTGGTCAGTCTATGTTTAGTTCGACTTATTCTCTCCGTTTGTGTGGGTTT	scaffold_408	100	95	0	0	1	95		641362	641268	1e-46	188
scf660	VI	39.758	<lmxll>,(ll,lm),lm,ll,ll,ll,ll,lm,ll,ll,lm,lm,ll,ll,ll,ll,lm,ll,ll,ll,lm,lm,ll,ll,ll,ll,ll,ll,lm,ll,ll,lm	TGCAGGTGGCACATTCCACGGAAACAGACGTGCAGTCGGCGCTGGAGGTCGCGGCTCTCAAAGAGGCACAGGAGGAGGAGGTGAAGGCACTGACT	scaffold_660	96.84	95	3	0	1	95		64929	64835	1e-39	165
scf767	VI	39.758	<hkxhk>,(hh,hk,kk),hh,kk,hk,kk,hk,hh,kk,kk,hh,hh,kk,hk,hk,kk,hh,hk,hk,hk,hh,hh,hk,hk,hk,kk,kk,kk,hk,kk,hk,hh	TGCAGGGCTGCGAGTGGCCAGCGTCAGGCAGTACAGCAAATAGGTTACTGAACTCATCAGCGTAAATCACTAGAATTTCTCCTCGTCAGAATGGT	scaffold_767	96.84	95	3	0	1	95		29873	29779	1e-39	165
scf822	VI	39.758	<hkxhk>,(hh,hk,kk),hk,hk,kk,hk,kk,hk,hk,hk,hk,hk,hk,kk,kk,hk,hk,kk,kk,kk,hk,hk,kk,kk,kk,hk,hk,hk,hh,hk,kk,hk	TGCAGGGACCTGTTTGGGGAGGTCCCATCCCACAGCGCGGACGCCTCTCAGCCGGAGACTGTGCACAAGGGGACCCACCGCCAGTGAGCACTGCG	scaffold_822	98.95	95	1	0	1	95		116645	116551	2e-44	180
scf2364	VI	41.547	<lmxll>,(ll,lm),ll,lm,lm,lm,lm,ll,lm,lm,ll,ll,lm,lm,lm,lm,ll,lm,lm,lm,ll,ll,lm,lm,lm,lm,--,lm,ll,lm,lm,ll	TGCAGGCCTGCTGGGCCTTTCCCACCTACGGCTCGGCCTTCTTCTACGGCCACATTTACACCAAAGCAGGCACCGCCGGGCACAAGGCCCTGCCC	scaffold_2364	100	95	0	0	1	95		8663	8569	1e-46	188
scf2364.1	VI	41.547	<lmxll>,(ll,lm),ll,lm,lm,lm,lm,ll,lm,lm,ll,ll,lm,lm,lm,lm,ll,lm,lm,lm,ll,ll,lm,lm,lm,lm,lm,lm,ll,lm,lm,ll	TGCAGGAAGCGGCGCTGCAGCTCGGCAGGGCTCTTCTCCCCGCTGCTCGCACGGCTCAGGTGCTGCATTCACGCGGTCAGTGATCAAAGTTTCAC	scaffold_2364	100	95	0	0	1	95		8660	8754	1e-46	188
scf1325	VI	43.335	<lmxll>,(ll,lm),ll,lm,lm,lm,lm,ll,lm,lm,ll,ll,LM,lm,lm,LM,ll,LM,lm,lm,ll,ll,lm,lm,lm,lm,lm,lm,ll,lm,lm,ll	TGCAGGGATCTGTTCTTGCCTCAGCGCTGTTGAATCTCTACATAAGCGACATTCTGACGGCATCTTCCCACAATTTTACGTATGCAGATGACATC	scaffold_1325	97.89	95	2	0	1	95		6684	6590	6e-42	172
scf1706	VI	43.335	<nnxnp>,(nn,np),np,nn,np,nn,np,np,nn,nn,np,np,np,np,np,nn,np,np,np,np,np,np,np,np,np,nn,nn,nn,nn,nn,nn,np	TGCAGGTCTGACATTCCACATGTGGCGACATTCTTGTTTCAAAATGAGTTTACGACCGTGAATGTACCCCTGTTGCTTAAAAGTTTAAAAGAATA	scaffold_1706	100	95	0	0	1	95		46639	46545	1e-46	188
scf1867	VI	43.335	<nnxnp>,(nn,np),nn,np,nn,np,nn,nn,np,np,nn,nn,nn,nn,nn,np,nn,nn,nn,nn,nn,nn,nn,nn,nn,np,np,np,np,np,np,nn	TGCAGGCAGTTTGGTGGTCATGATTCTTGGCAGGTAAGTTTTTTTATTGCCTATCTATAGCCTGTGTGATGTGCGTGAGCCTACTTTAATTTGTC	scaffold_1867	98.95	95	1	0	1	95		68258	68352	8e-32	139
scf1867.1	VI	43.335	<nnxnp>,(nn,np),np,nn,np,nn,np,np,nn,nn,np,np,np,np,np,nn,np,np,np,np,np,np,np,np,np,nn,nn,nn,nn,nn,nn,np	TGCAGGAACTGAACATGGATTTGAAAGCATTTACGGCGATACTGTGTAGTGCAATAATGGAATAATGCGTCGTTATTACCCTCACGGCTCTTTGT	scaffold_1867	100	95	0	0	1	95		68261	68167	1e-46	188
scf2351	VI	43.335	<lmxll>,(ll,lm),lm,ll,ll,ll,ll,lm,ll,ll,lm,lm,ll,ll,ll,ll,lm,ll,ll,ll,lm,lm,ll,ll,ll,ll,ll,ll,lm,ll,ll,lm	TGCAGGGATTATAAAATACTAGCTGTACTACCCGGCTTCGCCCGGGACTTGAATCCACGATGCCCGGCCGCCTTTGTCTCCCCAGTGGCGATGTT	scaffold_2351	98.95	95	1	0	1	95		4451	4357	2e-44	180
scf2364.2	VI	43.335	<nnxnp>,(nn,np),np,nn,np,nn,np,np,nn,nn,np,np,np,np,np,nn,np,np,np,np,np,np,np,np,np,nn,nn,nn,nn,nn,nn,np	TGCAGGCAGTAGAAGCCAGGGCTGCTCGGGCTGTAGGCCAGCCGTGCGTTATCTAGACAAACCAGTGCAGTTGTGCTCGCATTACACACAGTGGA	scaffold_2364	98.95	95	1	0	1	95		17664	17758	2e-44	180
scf408.3	VI	43.335	<lmxll>,(ll,lm),ll,lm,lm,lm,lm,ll,lm,lm,ll,ll,lm,lm,lm,lm,ll,lm,lm,lm,ll,ll,lm,lm,lm,lm,lm,lm,ll,lm,lm,ll	TGCAGGCTAGTGTCTAACGTGCGTGCTCTTGCAAGGCTTCGCCGACTACGGGTGGCCAATTTAAATGTGCGTGACACTCTGCACTAATGAGGGCA	scaffold_408	100	95	0	0	1	95		641359	641453	1e-46	188
scf4473	VI	43.335	<hkxhk>,(hh,hk,kk),hk,hk,hh,hk,hh,hk,hk,hk,hk,hk,hh,hh,hh,hk,hk,hh,hh,hh,hk,hk,hh,hh,hh,hk,hk,hk,kk,hk,hk,hk	TGCAGGGACCTGGTTTTAGTTTATTGTCTGTGTTTATCAATTTGAAAATACCACGACACATCTGGAAATTTTCCGTGGCACATCAGTTCCAAAGC	scaffold_4473	98.95	95	1	0	1	95		3979	3885	2e-44	180
scf4473.1	VI	43.335	<hkxhk>,(hh,hk,kk),hk,hk,--,hk,hh,hk,hk,hk,hk,hk,hh,hh,hh,hk,hk,hh,hh,hh,hk,hk,hh,hh,hh,hk,hk,hk,kk,hk,hk,hk	TGCAGGTGGATCACAGACTTCCTGTCTGACAGAAAGCAGTGCGTTAAGCTGGGAACATAAGTCTCTGACTCTAGGTCCATCAGCACCGGAACTCC	scaffold_4473	100	95	0	0	1	95		10973	11067	1e-46	188
scf4808	VI	43.335	<nnxnp>,(nn,np),np,nn,np,nn,NP,np,nn,nn,np,NP,NP,np,np,nn,np,np,np,np,np,np,np,np,np,nn,nn,nn,nn,nn,nn,np	TGCAGGGGGGACTGTAATGTTAAACTTATTAACTCAATTCTATAAAGCATAACATTTGGTAAACAAATCTGATAAAATCCACGAATTCACAACAG	scaffold_4808	98.95	95	1	0	1	95		214152	214246	2e-44	180
scf660.1	VI	43.335	<nnxnp>,(nn,np),np,nn,np,nn,np,np,nn,nn,np,np,np,np,np,nn,np,np,np,np,np,np,np,np,np,nn,nn,nn,nn,nn,nn,np	TGCAGGTTGGTGTCACCCACAGATGTATCTGTCTGTGTTCCACCAGCGCCTGTTTAATGATGCAGCACTACAGGCAATTGTCATATCCAAGCAAT	scaffold_660	100	95	0	0	1	95		51455	51361	1e-46	188
scf3577	VI	50.639	<lmxll>,(ll,lm),lm,ll,ll,ll,ll,lm,ll,ll,lm,lm,ll,lm,lm,ll,lm,ll,ll,ll,lm,lm,ll,lm,ll,ll,ll,ll,lm,ll,ll,lm	TGCAGGTTGGTGTTGTCTCATATACGCACCTGGCACTGTCTGCGTGACACACCAACCCTGGCTCAAAAGTACTGGATTATACCCTCGTGGCATGA	scaffold_3577	100	95	0	0	1	95		83875	83781	1e-46	188
scf775	VI	50.639	<efxeg>,(ee,ef,eg,fg),eg,fg,fg,ef,fg,eg,ef,ef,eg,eg,fg,eg,eg,ef,eg,fg,fg,fg,eg,eg,fg,eg,fg,ef,ef,ef,ee,ef,ef,eg	TGCAGGGTTGCCCAGTGGCGTAGCCATTGATGGAAGTGCAACGAGACTTTGGTTGCCGACCCGTCCGTGCGGTTGCTCTGATTTAGTTGAACACG	scaffold_775	100	95	0	0	1	95		21930	21836	1e-46	188
scf775.1	VI	50.639	<lmxll>,(ll,lm),lm,ll,ll,ll,ll,lm,ll,ll,lm,lm,ll,lm,lm,ll,lm,ll,ll,ll,lm,lm,ll,lm,ll,ll,ll,--,lm,ll,ll,lm	TGCAGGTCGTTGCTCAGGGAGCACGGCACTTGCAATGGCTGCCCGTCATGGCACAAGGGAGAATCCAGATCACTCAGCACCTCCCTCCTGCCCGA	scaffold_775	100	95	0	0	1	95		68753	68847	1e-46	188
scf2173	VI	51.501	<nnxnp>,(nn,np),nn,nn,nn,np,nn,nn,np,np,nn,nn,nn,nn,nn,np,nn,nn,nn,nn,nn,nn,nn,nn,nn,np,np,np,np,np,np,nn	TGCAGGGGTGCGCGAGCGACAAAGGATCGCGACGTCAATCACACGCAGTGCCGGCCCTTCGCACACGTGTAACCATCATCAGTAATGGTCTCACA	scaffold_2173	97.89	95	2	0	1	95		36379	36285	6e-42	172
scf2087	VI	52.364	<hkxhk>,(hh,hk,kk),hk,hh,hh,hk,hh,hk,kk,hk,hk,hk,hh,hk,hk,hk,hk,hh,hh,--,hk,hk,hh,hk,hh,hk,hk,hk,kk,hk,hk,hk	TGCAGGTGGAAGGTGAAGGCGACAATTTGGGAGTGCTACCCTCATCGCGACTCTGTGGGATTTCGGATGCTGGTGGACCGCTCTCCACAGACCTC	scaffold_2087	98.95	95	1	0	1	95		32894	32988	2e-44	180
scf245.2	VI	53.226	<lmxll>,(ll,lm),--,lm,lm,lm,lm,ll,ll,lm,ll,ll,lm,ll,ll,lm,ll,lm,lm,lm,ll,ll,lm,ll,lm,lm,lm,lm,ll,lm,lm,ll	TGCAGGCGAGGAGGTAATGGCCATCCGTCATTAAACTCATTCCATTGGAATATTGTGCAATATTGCACTGCCCCTGCAAAGAACAGCTCTTATAA	scaffold_245	98.95	95	1	0	1	95		267700	267606	2e-44	180
scf2289	VI	54.088	<lmxll>,(ll,lm),ll,lm,lm,lm,LM,ll,ll,lm,ll,ll,lm,ll,ll,lm,ll,lm,lm,LM,ll,ll,LM,ll,lm,lm,LM,--,ll,lm,lm,ll	TGCAGGTTTGGTTTCGTTGCCCATGACGAGCACGTCTGAAAATGTGCACGGGGGTCTTTTCACGTGTTTTGCCGACATGTAGGCCCATTCAGAAT	scaffold_2289	100	95	0	0	1	95		37866	37960	1e-46	188
scf327.2	VI	54.088	<lmxll>,(ll,lm),lm,ll,ll,ll,ll,lm,lm,ll,lm,lm,ll,lm,lm,ll,lm,ll,ll,ll,lm,lm,ll,lm,ll,ll,ll,ll,lm,ll,ll,lm	TGCAGGGGTGCGCGCGCGTGCATGCCCCCGTGTTCGTTTGTGTGGTGGTGTGATTTAAGGGTGTGGGAGATAACCCCAGGCGGTGGTGAGCCAGC	scaffold_327	98.95	95	1	0	1	95		44453	44359	2e-44	180
scf705	VI	54.088	<hkxhk>,(hh,hk,kk),hk,hh,hh,hk,hh,hk,kk,hk,hk,hk,--,hk,hk,hk,hk,hh,hh,hh,hk,hk,hh,hk,hh,hh,hk,hk,kk,hk,hk,hk	TGCAGGTTTCCAGCAGGTTATGTAATGTGAGATTAACATGAGATAACATTTAAACAATATGGAAAAATTACATCGTCATTGTAATAATAATTAAC	scaffold_705	98.95	95	1	0	1	95		53059	53153	2e-44	180
scf705.2	VI	54.088	<nnxnp>,(nn,np),nn,nn,nn,np,nn,nn,np,np,nn,nn,nn,nn,nn,np,nn,nn,nn,nn,nn,nn,nn,nn,nn,nn,np,np,np,np,np,nn	TGCAGGCCACAACAAAGATACACGTGTAGTCTCTGTAGGCCACAACAAAGATACACTTGTAGTCTCTGTAGGCCACAACAAAGATACACTTGTAG	scaffold_705	98.95	95	1	0	1	95		106396	106302	2e-44	180
scf705.1	VI	54.121	<nnxnp>,(nn,np),nn,nn,nn,np,nn,nn,np,np,nn,nn,nn,nn,nn,np,nn,nn,--,nn,nn,nn,nn,nn,nn,nn,np,np,np,np,np,nn	TGCAGGGACTACAAGTGCATCTTTGTTGTGGCCTACAAAGACTACAAGTATATCTTTGTTGTGGCCTACAGAGACTACAAGTGCATCTTTGTTGT	scaffold_705	96.84	95	3	0	1	95		106393	106487	1e-39	165
scf2781	VI	57.601	<lmxll>,(ll,lm),LM,ll,ll,ll,ll,lm,lm,ll,lm,ll,ll,lm,lm,--,lm,ll,ll,ll,LM,LM,ll,lm,ll,ll,ll,ll,lm,ll,ll,LM	TGCAGGAGCATTGGCTGGGAGGAAGGAGCCCGTGGGCATCTAGATATCGACGTTGGAGGTGGTTGTGTGTGGTCTGGGCCATGGGTGGCGTGGCC	scaffold_2781	98.95	95	1	0	1	95		13340	13434	2e-44	180
scf1421	VI	61.113	<efxeg>,(ee,ef,eg,fg),fg,eg,eg,ee,eg,fg,ef,ee,ef,fg,eg,fg,fg,ee,fg,eg,ee,eg,fg,fg,eg,fg,eg,eg,ee,ee,ef,--,ee,fg	TGCAGGTTGGAGGCCCCCTTGAAGTCCCACTTCCGATTACCGCGGCCAAAAAACCTGGATGGCAAGAGCGCACGTTTGTGCTCGCACGAGCGAGA	scaffold_1421	98.95	95	1	0	1	95		250394	250300	2e-44	180
scf1626	VI	62.838	<lmxll>,(ll,lm),lm,ll,ll,ll,ll,lm,lm,ll,lm,lm,ll,lm,lm,ll,lm,ll,ll,ll,lm,lm,ll,lm,ll,ll,ll,ll,lm,ll,ll,lm	TGCAGGTGATGTTTGCGGCGAGCAACGGACGTGAGGACCCCCGGTACGTGAGCTCCGACTCCGGGTTGATGCTCCTGCCGGACCTGTCCCCCCAC	scaffold_1626	100	95	0	0	1	95		32392	32298	1e-46	188
scf327	VI	62.838	<hkxhk>,(hh,hk,kk),kk,hk,hk,hh,hk,kk,hk,hh,hk,kk,hk,kk,hk,hh,kk,hk,hh,hk,kk,kk,hk,kk,hk,HK,hh,hh,hk,hh,hh,kk	TGCAGGAGTCCATTGTTCAATCTTCGTGGGCTGCTGGCAGCTTCACTAAGGTGGCCAGTGAACCATCGATCTTGATTTGGAACTTTCGTGACTGC	scaffold_327	98.95	95	1	0	1	95		38245	38151	2e-44	180
scf327.1	VI	62.838	<hkxhk>,(hh,hk,kk),--,hk,hk,hh,hk,kk,hk,hh,hk,kk,hk,kk,hk,hh,kk,hk,--,hk,kk,kk,hk,kk,hk,hk,hh,hh,hk,hh,hh,kk	TGCAGGATCTCCAGCCAGCGCGACAATTGGCCTGATGGCTGTGCCACTTGCAGCGCATATTGGAGGGCCGCATGATCGGAACGGACCTAAAAATG	scaffold_327	100	95	0	0	1	95		203160	203066	1e-46	188
scf327.3	VI	62.838	<nnxnp>,(nn,np),NP,np,np,nn,np,np,nn,nn,nn,np,np,np,nn,nn,np,np,nn,np,np,np,np,np,np,np,nn,nn,nn,nn,nn,np	TGCAGGTCAATAGGTGTGTACCCATTTATACTGTTTGGTCGATAGAGATGGAGGGAAAAAAGTGTTACCAGCGTGGTGCCGAAAGGAGGAACCAT	scaffold_327	100	95	0	0	1	95		227055	227149	1e-46	188
scf334.1	VI	62.838	<lmxll>,(ll,lm),lm,ll,ll,ll,ll,lm,lm,ll,lm,lm,ll,lm,lm,ll,lm,ll,ll,ll,lm,lm,ll,lm,ll,ll,ll,ll,lm,ll,ll,lm	TGCAGGATGTCCAGACAAAATAGTGGACTATTGAAAGAACGAATTATTACCTGCTGCGTGTAATTTCAGCCTCTTTATCTTCCCAGCATGCATAC	scaffold_334	100	95	0	0	1	95		55298	55392	1e-46	188
scf816	VI	62.838	<nnxnp>,(nn,np),np,np,np,nn,np,np,--,nn,nn,np,np,np,nn,nn,np,np,nn,np,np,np,np,np,np,np,nn,nn,nn,nn,nn,np	TGCAGGCCATGCCGGCACCACCACCACTGGGGAGGGCCTCACTGCTGAAGGCTTCAGGGCTCTGGGTTCCGGCTGAGCTTCCACTGGCGCCATCG	scaffold_816	97.89	95	2	0	1	95		51147	51053	6e-42	172
scf90	VI	62.838	<lmxll>,(ll,lm),lm,ll,ll,ll,ll,lm,lm,ll,lm,lm,ll,lm,lm,ll,--,ll,ll,ll,lm,lm,ll,lm,ll,ll,ll,ll,lm,ll,ll,lm	TGCAGGCGAGGGTGGCTCAAGACCGGTTCGCATATCGCTCGCCCACTTTTGATGTCACCCATGGCGCTGGAGTCGTCGCTCCAGGTGCCCGACAT	scaffold_90	98.95	95	1	0	1	95		365766	365860	2e-44	180
scf11618	VI	64.563	<hkxhk>,(hh,hk,kk),kk,hk,hk,hh,hk,kk,hk,hh,hk,kk,hk,kk,hk,hk,kk,hk,hh,hk,kk,kk,hk,kk,hk,hk,hh,hh,hk,hh,hh,kk	TGCAGGGAGGGTTGCAGAAGGCGAAAAGATATTCTGACTACACAATCCGCAAAGCCATCACCCCAACCGTGAGGAAGAGAACCATTTGAAGATCC	scaffold_11618	100	95	0	0	1	95		1596	1690	1e-46	188
scf2521	VI	64.563	<efxeg>,(ee,ef,eg,fg),fg,eg,eg,ee,eg,fg,ef,ee,ef,fg,eg,fg,ef,eg,fg,eg,ee,eg,fg,fg,eg,fg,eg,eg,ee,ee,ef,ee,ee,fg	TGCAGGGACCTGTTTAAAGTATTGCTGATGTTTTGTCGTAGTTGTTGTGCCCTTTAAAGTCAATGGATTAATTTCTATCTTGTTTTTTACCGACG	scaffold_2521	98.94	94	1	0	1	94		31216	31123	1e-43	178
scf90.1	VI	64.563	<lmxll>,(ll,lm),LM,ll,ll,ll,ll,lm,lm,ll,LM,LM,ll,lm,lm,ll,lm,ll,ll,ll,lm,lm,ll,LM,ll,ll,ll,ll,lm,ll,ll,lm	TGCAGGCAGCAGAAGCAGCGGTATGAAGCCCATGCTCCATGCCGCTATTTTTGGTGCACCTTACTTTACTTACCTTACTTTTTGCACCACCCGGC	scaffold_90	100	95	0	0	1	95		126193	126099	1e-46	188
scf90.3	VI	64.563	<nnxnp>,(nn,np),np,np,np,nn,np,np,nn,nn,nn,np,np,np,nn,np,np,np,nn,np,NP,np,np,np,np,np,nn,nn,nn,nn,nn,np	TGCAGGCGACGTCTCTTTGCTCTGTGTGGGAAAGGACAACATCCACTGCATTACTGAGCCTTCCATTGTAGTACCAGCACCGTATGTCAACATTG	scaffold_90	98.95	95	1	0	1	95		554445	554351	2e-44	180
scf1211	VI	65.425	<lmxll>,(ll,lm),lm,ll,ll,ll,ll,lm,lm,ll,lm,lm,ll,lm,lm,ll,lm,ll,ll,ll,lm,LM,ll,lm,ll,ll,ll,ll,lm,ll,ll,lm	TGCAGGGACCTGCTATCCATACCTCAATTCAAGGTTGTGGACTAAATTTTGCCAGGGACAATTAGCGTTGGGCCCTTCTGTCGTAAGACAGATGT	scaffold_1211	100	95	0	0	1	95		47640	47734	1e-46	188
scf245	VI	66.287	<hkxhk>,(hh,hk,kk),hk,kk,kk,kk,kk,hk,hh,HK,hh,hk,kk,hk,hh,kk,HK,kk,hk,kk,hk,HK,kk,hk,kk,kk,hk,hk,hh,hk,hk,hk	TGCAGGAGTCATTAAATTCGTTTTCTCAGACAAGTTGAGTGTTCCACCTGCTCAATCTTATTCACCCAGGGTAACTCTGATGAAGGTGGTGTGAA	scaffold_245	100	95	0	0	1	95		241997	242091	1e-46	188
scf4322	VI	66.287	<hkxhk>,(hh,hk,kk),hh,hk,hk,hk,hk,hh,hk,kk,hk,hh,hk,hh,hk,hk,hh,hk,kk,hk,hh,--,hk,hh,hk,hk,kk,kk,hk,kk,kk,--	TGCAGGGTGTCTACAAGGAGATGGCGGACGTGTTTGACCCTCCGTCCGGGGCGTGCCAGAGGTTTAAAAACTGCCAGCGTGAAGCATCCGAATCG	scaffold_4322	100	95	0	0	1	95		3002	3096	1e-46	188
scf261	VI	68.012	<nnxnp>,(nn,np),np,np,np,np,np,np,nn,np,nn,np,np,np,nn,np,np,np,nn,np,np,np,np,np,np,np,nn,nn,nn,nn,nn,np	TGCAGGTAAGGGTCAATGGTGAATATACATACAGCCTAACAATGGCACTATATTATCCCCTCCTTGTAGCTTCCAAACCATGGAAGAGTATGTGT	scaffold_261	98.95	95	1	0	1	95		31829	31923	2e-44	180
scf547	VI	68.012	<lmxll>,(ll,lm),ll,lm,lm,lm,lm,ll,ll,lm,ll,ll,lm,ll,ll,lm,ll,lm,lm,lm,ll,ll,lm,ll,lm,lm,lm,lm,ll,lm,lm,ll	TGCAGGTACGCGATGTTACGCTCACAGCGCAATAGCAGAGGAACCTTACTGTATACTGCAGCTGCTCATTAACGTGAATACTGTGGAATTGACCG	scaffold_547	96.84	95	3	0	1	95		3764	3670	1e-39	165
scf297	VI	69.737	<nnxnp>,(nn,np),np,np,np,np,np,np,NP,np,nn,np,np,np,nn,np,np,np,nn,np,np,np,np,np,np,np,nn,nn,nn,nn,nn,np	TGCAGGGGCGCGCGCGTGCACGCCACCGCGTTCGCTTTTGTGGTGGTGCACGTGGGCGTGTGCTAGCAGTGGTGAGCCAGCCAGTTAGCTATGTC	scaffold_297	98.95	95	1	0	1	95		188462	188368	2e-44	180
scf431	VI	69.737	<efxeg>,(ee,ef,eg,fg),--,ee,ee,ee,ee,ef,ef,ee,fg,ef,ee,ef,fg,ee,ef,ee,eg,ee,ef,ef,ee,ef,ee,ee,eg,eg,fg,eg,eg,ef	TGCAGGAGTTGGCACCCCCGCGGTCTGAACTGCGCGAACCGCATCCCTGCGGTCTCCCGCGCTCGCACAACCCAGCAGCCCTCCCTTGAAGGCCA	scaffold_431	97.89	95	2	0	1	95		259668	259762	6e-42	172
scf93	VI	69.737	<hkxhk>,(hh,hk,kk),hh,hk,hk,hk,hk,hh,hh,hk,hk,hh,hk,--,hk,hk,hh,hk,kk,hk,hh,hh,hk,hh,hk,hk,kk,kk,hk,kk,kk,hh	TGCAGGACCGCCACTACTAAATCGGAGGAGGCTTTCTGGCAGATTCTCTGGCCGTAGGCCGGTTGGCCAGCCGCAACCTCGGGAAGCGGCCCGGG	scaffold_93	100	95	0	0	1	95		428225	428319	1e-46	188
scf93.1	VI	69.737	<hkxhk>,(hh,hk,kk),kk,hk,hk,hk,hk,kk,kk,hk,hk,kk,hk,kk,hk,hk,kk,hk,--,hk,kk,kk,hk,kk,hk,hk,hh,hh,hk,hh,hh,kk	TGCAGGATTTCTAGCCAGCATGAGAGCTGGCCCGATGGTTGCTCAATGCGCAAGGCGTACTGGAGGGCGGCGTGATCGAAGCCCGAAGCGTCCTC	scaffold_93	100	95	0	0	1	95		432198	432292	1e-46	188
scf93.2	VI	69.737	<nnxnp>,(nn,np),np,np,np,np,np,np,np,np,nn,np,np,np,nn,np,np,np,nn,np,np,np,np,np,np,np,nn,nn,nn,nn,nn,np	TGCAGGGGAATGGGCATGGCAGCTCTCTTTTCCCCGAGGCCATACCCAATTGTGCCTCAATGGGGGGTTCGTTTTTCCGCCCACACATGAGGAAA	scaffold_93	98.95	95	1	0	1	95		405778	405872	2e-44	180
scf334	VI	70.6	<lmxll>,(ll,lm),ll,lm,lm,lm,lm,ll,ll,lm,ll,ll,lm,ll,ll,lm,ll,lm,lm,lm,ll,ll,lm,ll,lm,lm,lm,lm,ll,lm,lm,ll	TGCAGGAATGCTGACTTTAATAAATATATAAATTCGACAGCGATGGCCGTAAATGCCTCGGAGTGCTATGCTTAATTCACATGTAAATATAATGC	scaffold_334	100	91	0	0	1	91		121536	121446	2e-44	180
scf90.2	VI	70.6	<lmxll>,(ll,lm),lm,--,--,ll,ll,lm,lm,ll,lm,lm,ll,lm,lm,ll,lm,ll,ll,--,lm,lm,ll,lm,ll,ll,ll,ll,lm,ll,ll,lm	TGCAGGGCAGTGGGCACAACGATGTTGTATTGGCGCAACCCTCCGTCCCAATACATTAGCAATCCGTCTCTAAGAATGACAGAGGTGACACGCCA	scaffold_90	98.95	95	1	0	1	95		269005	269099	2e-44	180
scf1523	VI	71.462	<hkxhk>,(hh,hk,kk),hk,--,hh,hh,hh,hk,hk,hh,kk,hk,hh,hk,kk,hh,hk,hh,HK,hh,hk,hk,hh,hk,hh,hh,hk,hk,kk,hk,hh,HK	TGCAGGTCTGCACCTGCAGCTCTGCGTTAGCCCTGTCCACTTCTGCGAATTGTGGTTCATGTTCCGCAAAACGTTAATTTAATAATTAGATTTCT	scaffold_1523	98.95	95	1	0	1	95		59648	59554	2e-44	180
scf108	VI	73.187	<lmxll>,(ll,lm),ll,lm,lm,LM,lm,ll,ll,lm,ll,ll,lm,ll,ll,lm,ll,lm,lm,lm,ll,ll,lm,ll,lm,lm,ll,lm,ll,lm,lm,ll	TGCAGGCTAGACGCCTCAACCCCAGCACAGCTGCTTTGCTGTGTGCATTTCCAACGGCTTCTTTTTGTTTAATTAGACATCTCTTGAATCATTTA	scaffold_108	100	95	0	0	1	95		542664	542570	1e-46	188
scf108.1	VI	73.187	<lmxll>,(ll,lm),lm,ll,ll,ll,ll,lm,lm,ll,lm,lm,ll,lm,lm,ll,lm,ll,ll,ll,lm,lm,ll,lm,ll,ll,lm,ll,lm,ll,ll,lm	TGCAGGCTCTTTGCTGTGCTCATTTATCTCCATCGCTGCGCGCGATCCACCGCATCTGGCTGGAGTGGACAAAAGTGGTGTGATCACCGCAGGGT	scaffold_108	100	95	0	0	1	95		424551	424645	1e-46	188
scf108.2	VI	73.187	<lmxll>,(ll,lm),ll,lm,lm,lm,lm,ll,ll,lm,ll,ll,lm,ll,ll,lm,ll,lm,lm,lm,ll,ll,lm,ll,lm,lm,ll,lm,ll,lm,lm,ll	TGCAGGGCATACTGCAACAGGCGGCATGGTCCCAGAGATACACGCATGCCTTCCAGAGCGCCCATCACAGCCTGGATCAGATGAGGAGACGTCTC	scaffold_108	100	95	0	0	1	95		294143	294049	1e-46	188
scf108.3	VI	73.187	<lmxll>,(ll,lm),ll,lm,lm,lm,lm,ll,ll,lm,ll,ll,lm,ll,ll,lm,ll,lm,lm,lm,ll,ll,lm,ll,lm,LM,ll,lm,ll,lm,lm,ll	TGCAGGTAACAGCATATTTAAGGAGTTGTATAATATTGTTATTCAATTAACTGGATAATAAAGCAGCACATTAGCAATGTTTGTGTGTACTTGAC	scaffold_108	98.95	95	1	0	1	95		294140	294234	2e-44	180
scf108.4	VI	73.187	<lmxll>,(ll,lm),lm,ll,ll,ll,ll,lm,lm,ll,lm,lm,ll,lm,lm,ll,lm,ll,ll,ll,lm,lm,ll,lm,ll,ll,lm,ll,lm,ll,ll,lm	TGCAGGAGACAGCATGGCGAGCATGATGCGGACATTAGCTGTGGAGCAGTGACGTAGATATCAAGTGTGCAGACCGCACTACTGCATCGAGGCGC	scaffold_108	100	95	0	0	1	95		424554	424460	1e-46	188
scf1223	VI	73.187	<lmxll>,(ll,lm),lm,ll,ll,ll,ll,LM,lm,ll,lm,LM,ll,lm,lm,ll,lm,ll,ll,ll,lm,lm,ll,lm,ll,ll,lm,ll,lm,ll,ll,lm	TGCAGGATTTCTCGTTCCACGTTACGTACTGCAAGGGTTCTCGTCATGCGAACGCCGATGCCCTATTGCGGTTGCCAGCGACCGGAGGTTGTGCA	scaffold_1223	98.95	95	1	0	1	95		68849	68943	2e-44	180
scf1742	VI	73.187	<efxeg>,(ee,ef,eg,fg),--,ee,ee,ee,ee,ef,ef,ee,fg,ef,ee,ef,fg,ee,ef,ee,eg,ee,ef,ef,ee,ef,ee,ee,fg,eg,fg,eg,ee,ef	TGCAGGTCATTGCAGCATTGCACTTTCATCCAATTAGACATTACTGACTGTTGAGGATTTCATCTCTCAATGTACATAGTCATTCTAAGTGCTAT	scaffold_1742	96.84	95	3	0	1	95		72288	72382	1e-39	165
scf3152	VI	73.187	<lmxll>,(ll,lm),ll,LM,lm,lm,lm,ll,ll,lm,ll,ll,lm,ll,ll,lm,ll,lm,lm,lm,ll,ll,lm,ll,lm,lm,ll,lm,ll,lm,lm,ll	TGCAGGTCAGTGCCATCTCTCATAACCACAAACAGCATTATCAGCCATGATCAATCCACTGCTGGATGATGGCTTCCACAAGCCGTCACCATCTC	scaffold_3152	100	95	0	0	1	95		6818	6724	1e-46	188
scf8148	VI	73.187	<lmxll>,(ll,lm),lm,ll,ll,ll,ll,lm,lm,ll,lm,lm,ll,lm,lm,ll,lm,ll,ll,ll,lm,lm,ll,lm,ll,ll,lm,ll,lm,ll,ll,lm	TGCAGGGGGGAGAAGACAATGCCAATATATAAAAAAGCATGAACAGACAAACCCCTTAGGTGACGCCACCATGGGAATGAATGACATGTGGACTA	scaffold_8148	98.95	95	1	0	1	95		10614	10520	2e-44	180
scf2054	VI	78.489	<lmxll>,(ll,lm),lm,ll,ll,ll,ll,lm,lm,ll,lm,lm,ll,lm,lm,ll,lm,ll,ll,ll,lm,lm,ll,ll,ll,ll,lm,ll,lm,ll,ll,lm	TGCAGGTGAAACGCGCCTTCCGCATACGCAATCGCAACGTGTTGCCGTTTGTGCGTTCGTACGCAATTTGCGATTCAAAATTCTGGATTTATATG	scaffold_2054	97.89	95	2	0	1	95		45080	45174	6e-42	172
scf24864.5	VI	78.489	<nnxnp>,(nn,np),np,np,np,np,nn,np,np,np,nn,np,np,np,nn,np,nn,np,nn,np,np,np,np,np,np,np,nn,nn,nn,nn,np,np	TGCAGGCTATCGACGCCACATGCGCAGGCGCTCGGGTGCGTTGGCATGATCGCGCGCCGTCGCTCACAACACAAATGCACGGGCGCGCGTGCATT	scaffold_24864	100	95	0	0	1	95		39719	39813	1e-46	188
scf3356.1	VI	78.489	<nnxnp>,(nn,np),nn,nn,nn,nn,--,nn,nn,nn,np,nn,nn,nn,np,nn,np,nn,--,nn,nn,nn,nn,nn,nn,nn,np,--,np,--,nn,nn	TGCAGGCCACAGTTGAAGCAGGACATGAGGCCCCGCTCCCGGCGCGGCGACGTCCTCTTCCAAGTGCGATCGCCATCCCAACGTGGCCGGTCGTC	scaffold_3356	98.95	95	1	0	1	95		38458	38552	2e-44	180
scf3533	VI	78.489	<efxeg>,(ee,ef,eg,fg),fg,eg,eg,eg,ee,fg,fg,eg,ef,--,eg,fg,ef,eg,ef,eg,ee,eg,fg,fg,eg,eg,eg,eg,ef,ee,ef,ee,eg,fg	TGCAGGGACCTGTTTTCTTTCACTGCGACTTATTTGTTTCGTGTCCGTCCACCAAAGTCAAACGTCCTTCCAGTGGCGAGCGCATGTCAACGCTC	scaffold_3533	98.95	95	1	0	1	95		14187	14281	2e-44	180
scf217.6	VI	79.352	<nnxnp>,(nn,np),nn,nn,nn,nn,--,nn,nn,nn,np,nn,nn,nn,np,nn,np,nn,--,nn,nn,nn,nn,nn,nn,nn,np,--,np,--,nn,nn	TGCAGGTTAAACAATTATCATGAGCTTCGATCTATCTACTTCACCGCTGGATGAAGGTCTCCCTAAGCCGTTTCGTGATACAACAAAATCTGGCT	scaffold_217	98.95	95	1	0	1	95		285158	285252	2e-44	180
scf24802	VI	79.352	<nnxnp>,(nn,np),np,np,NP,np,nn,np,np,np,nn,np,np,np,nn,np,nn,np,nn,np,np,np,np,np,np,np,nn,nn,nn,nn,np,np	TGCAGGCCCTGCTCACCAGCGCCGCCTTCTACATAAAGCGCGACCACCTCTTCGTCCTCGAAGAGGAGAACAAGATCCGTCTGGTGAGACACGTG	scaffold_24802	100	95	0	0	1	95		12312	12218	1e-46	188
9987	VI	80.214	<efxeg>,(ee,ef,eg,fg),ee,ef,ef,ef,fg,ee,ee,ef,eg,ee,ef,ee,eg,ef,eg,ef,fg,ef,ee,ee,ef,ef,ee,--,eg,fg,eg,fg,ef,ee	TGCAGGGCCGACACGGCGTGGGGCAGGGCCTTCACACGGCAGTCAATTGACAACGGATTGCAATGAATTCAAGCGTTGCCGGTTGCAGTGAGTTG
scf217.1	VI	80.214	<efxeg>,(ee,ef,eg,fg),ee,ef,ef,ef,fg,ee,ee,ef,eg,ee,--,ee,eg,ef,eg,ef,fg,ef,ee,ee,ef,--,ee,ef,eg,fg,eg,fg,ef,ee	TGCAGGTGGCTCACGACTGTGAATAGCTGGCGTGAAAGGATGAAGCGATTCATCAATTAAAAGAAATATTTACACTCAAGGTGCATGCATAGAAT	scaffold_217	98.95	95	1	0	1	95		285161	285067	2e-44	180
scf217.2	VI	80.214	<efxeg>,(ee,ef,eg,fg),ee,ef,ef,ef,fg,ee,ee,ef,eg,ee,ef,ee,eg,ef,eg,ef,fg,ef,--,ee,ef,ef,ee,ef,eg,fg,--,fg,ef,ee	TGCAGGAGAGGCCCGACAGCGCTCGGCACGCTTGGCACGCAGGGAGCACGTGACGCTGCGCAGCCTAATGATGCGCGGCCTAACGGGTTGACCCC	scaffold_217	98.95	95	1	0	1	95		51194	51288	2e-44	180
scf217.3	VI	80.214	<hkxhk>,(hh,hk,kk),kk,hk,hk,hk,hh,kk,kk,hk,hk,kk,hk,kk,hk,hk,hk,hk,--,hk,kk,kk,hk,hk,--,hk,hk,hh,hk,hh,hk,kk	TGCAGGACGAGGTCGTGCAGCCCCTCGGCCTCCACGGACACGTCCAGCACGCTCGTCACCTCCAGCAGCGTCTCCAGGAATCCCGCTGCAGGCAC	scaffold_217	98.95	95	1	0	1	95		290573	290667	2e-44	180
scf24864	VI	80.214	<efxeg>,(ee,ef,eg,fg),ef,ee,ee,ee,eg,ef,ef,ee,fg,ef,ee,ef,fg,ee,fg,ee,eg,ee,ef,ef,ee,ee,ef,ee,fg,eg,fg,eg,ee,ef	TGCAGGTAGCTCACCCACCCCAGCAGGTACCACACCTGTGCAGGGCCGACAGCCAGTCAAAATACCACAACCACACACGGAACTAGCACCCGTCC	scaffold_24864	97.89	95	2	0	1	95		229187	229281	6e-42	172
scf24864.2	VI	80.214	<lmxll>,(ll,lm),lm,ll,ll,ll,ll,lm,lm,ll,lm,lm,ll,lm,lm,ll,lm,ll,ll,ll,lm,lm,ll,ll,lm,ll,lm,ll,lm,ll,ll,lm	TGCAGGTGGCTCTCATGTCCATGTTAACAATTCACTTTGGCATCATACATGCAGAGGAATGAAGTCACATTAAACCGAATTAATAAACGTCGCTA	scaffold_24864	96.84	95	3	0	1	95		39722	39628	1e-39	165
scf24864.3	VI	80.214	<lmxll>,(ll,lm),lm,ll,ll,ll,ll,lm,lm,ll,lm,lm,ll,lm,lm,ll,lm,ll,ll,ll,lm,lm,ll,ll,lm,ll,lm,ll,lm,ll,ll,lm	TGCAGGCTCGCAACAGGGTACGGGCACATCACTCTGCGTGCGATAAAGTATGCTATGAACATGCCCTTCAGTTCGTAACATACCCTTTAGAAAGT	scaffold_24864	100	95	0	0	1	95		99370	99276	1e-46	188
scf24864.4	VI	80.214	<lmxll>,(ll,lm),ll,lm,lm,lm,lm,ll,ll,lm,ll,ll,lm,ll,ll,lm,ll,lm,lm,lm,ll,ll,lm,lm,ll,lm,ll,lm,ll,lm,lm,ll	TGCAGGATGTGGTAAGGAGTTTGCGGTGCGCATGACGGGCTGCGCCCCTGATCCCTTGATCTCCAGCACGCGGTTCCCAACTGGTCCGGAACCTG	scaffold_24864	100	95	0	0	1	95		87791	87885	1e-46	188
scf217.5	VI	82.393	<lmxll>,(ll,lm),ll,lm,lm,lm,lm,ll,ll,LM,ll,ll,lm,ll,ll,lm,ll,lm,lm,lm,ll,ll,lm,lm,ll,lm,ll,lm,lm,lm,lm,ll	TGCAGGCAATTTTCTGATCTTGATTTGAAGCTTTCGTGACTGCAGGAATCCATACTCTTTGGATCTTTCGGTAAAGTCACGTAGGTATAACAGCT	scaffold_217	98.95	95	1	0	1	95		141702	141796	2e-44	180
scf217.4	VI	84.573	<lmxll>,(ll,lm),ll,lm,lm,lm,lm,ll,ll,ll,ll,ll,lm,ll,ll,lm,ll,LM,lm,lm,ll,ll,lm,lm,ll,lm,ll,lm,lm,--,lm,ll	TGCAGGGCCCCCGGTGTCATCAGACAGACCCAGGGTAGGCACAAGTGCTGAATTCTGGGACTTTGTGCAAAACGTTTCCTCTTTACTTACAGCTT	scaffold_217	100	95	0	0	1	95		48890	48984	1e-46	188
scf682.1	VI	86.752	<lmxll>,(ll,lm),lm,ll,ll,ll,ll,lm,lm,ll,lm,lm,ll,lm,lm,ll,LM,ll,ll,ll,lm,lm,ll,ll,lm,ll,lm,ll,ll,ll,ll,lm	TGCAGGAGTGCGTGGCACATTTTGGCGCCAGCTATCATGTAGTGGTCTTGTCGTTACGGTTCTCTGCGGTAAGTGCAATGTCTTTAAAAACAACT	scaffold_682	98.95	95	1	0	1	95		56353	56447	2e-44	180
scf217.7	VI	88.482	<nnxnp>,(nn,np),nn,nn,nn,nn,np,nn,nn,nn,np,nn,nn,nn,nn,nn,np,nn,np,nn,nn,nn,nn,nn,nn,nn,np,np,np,np,nn,nn	TGCAGGGGATATGAGACGCTTTCATCTGGAATTCCACTCAGGAGGCTGCAATAATTATTCTAAGTAAACACAACAAGGACAAATACTTTGGGTGT	scaffold_217	98.95	95	1	0	1	95		176942	177036	2e-44	180
scf247	VI	88.932	<lmxll>,(ll,lm),lm,ll,ll,ll,ll,lm,lm,ll,lm,lm,ll,lm,lm,ll,ll,ll,ll,ll,lm,lm,ll,ll,lm,ll,lm,ll,ll,ll,ll,LM	TGCAGGTGCCACTGTGTGGAAGCGTGCGCAGTGTACACAGTACTTGTGTTTGTTCAACGTGTGTTCGTTGTGTGTGCAGTCTGTTCAGTGATGGT	scaffold_247	98.95	95	1	0	1	95		294595	294501	2e-44	180
scf24799	VI	91.112	<lmxll>,(ll,lm),lm,ll,ll,ll,ll,lm,lm,ll,lm,lm,ll,lm,lm,ll,lm,ll,ll,ll,lm,lm,ll,ll,LM,ll,lm,ll,ll,ll,ll,lm	TGCAGGTACAATGCACAATGCGCCACATTCTGTGATCCTCATACCACTACACCACGTTTTATTTTCTCTATTCCTCATCGCTATTGCTTGACAAA	scaffold_24799	100	95	0	0	1	95		531	625	1e-46	188
scf682	VI	93.291	<lmxll>,(ll,lm),lm,ll,ll,ll,ll,lm,lm,ll,lm,lm,ll,lm,lm,LM,lm,ll,ll,ll,lm,lm,ll,ll,lm,ll,lm,ll,ll,ll,ll,lm	TGCAGGTCTACTACGTCTCGCCTTTGGTCATAAGTCGTTCGTCGAGTCAACACTGACCTTAAGCTGTGTTGTGAAGCAACACAGAGTGTGGCTGT	scaffold_682	98.95	95	1	0	1	95		47072	47166	2e-44	180
scf247.3	VI	95.471	<lmxll>,(ll,lm),ll,lm,lm,lm,lm,ll,ll,lm,ll,ll,lm,ll,ll,lm,ll,lm,lm,lm,ll,ll,lm,lm,ll,lm,ll,lm,LM,lm,lm,ll	TGCAGGGATAATTACATTTACTCTAGGGGTTTCAGCCATCATTGCAGTCTATGTAAATGCATATTCGCCAGGTTAACGGTCGATTGTGTGACTAA	scaffold_247	98.95	95	1	0	1	95		1753	1847	2e-44	180
scf217	VI	96.749	<abxcd>,(ac,ad,bc,bd),ac,bc,bc,bc,bd,ac,ac,bc,ad,ac,bc,ac,ad,bc,ad,bc,bd,bc,--,ac,bc,bc,ac,bc,--,bd,bd,bd,bc,ac	TGCAGGCTGAAAACAAATATGAGTCGCGATAACTGCACGCAAAATTGATATCCATTGGGCAAAAGGTGCCATTGTGTGCATGTGTAATGTACACA	scaffold_217	98.95	95	1	0	1	95		141705	141611	2e-44	180
scf235	VI	99.158	<hkxhk>,(hh,hk,kk),hk,hh,hk,hh,hk,hk,hk,hh,kk,hk,hh,hk,kk,hh,kk,hh,hk,hh,hk,hk,hh,hh,hk,hh,HK,hk,hk,hk,hh,hk	TGCAGGTTAGTCACAGGCTCCAGCTCTTGCCACCTAAAGAACCAACAACAATTAAGCAACCAGCAATTTTGGGAAAAAACATTTTTTGTTAGCCA	scaffold_235	98.95	95	1	0	1	95		23133	23039	2e-44	180
scf247.2	VI	99.158	<lmxll>,(ll,lm),ll,lm,lm,lm,LM,ll,ll,lm,ll,ll,lm,ll,ll,lm,ll,lm,lm,lm,ll,ll,lm,lm,ll,lm,--,lm,lm,lm,lm,ll	TGCAGGATATTAGTGGGGGTTACCTTTAGCAAGAACACATAGTAATTGTCAGGTAAATTAGCCAACCTTGCATTGATTATACATGCCAATCATCA	scaffold_247	100	95	0	0	1	95		1756	1662	1e-46	188
scf247.4	VI	99.158	<nnxnp>,(nn,np),np,NP,nn,np,nn,NP,np,np,nn,np,np,np,nn,np,nn,np,nn,np,np,np,np,np,np,np,nn,nn,nn,nn,np,np	TGCAGGGACCCGTTATATTTTGTTAAAAGTATACCCACCAGGCACTTTTTCAAAGCGTGCTGGCTGGCATCACTGATCACAAGGATTGTGGTTAA	scaffold_247	100	95	0	0	1	95		142604	142510	1e-46	188
scf247.5	VI	99.158	<nnxnp>,(nn,np),np,np,nn,np,nn,np,np,np,nn,np,np,np,nn,np,nn,np,nn,np,np,np,np,np,np,np,nn,nn,nn,nn,np,np	TGCAGGAGACAGAAGTCCTTCAGTTCCTCCAGGGAAATGAGTGCCTTGCTCTGCCGGATCACCTACATGACCCAGGAGACAACCCACACAACCAG	scaffold_247	98.95	95	1	0	1	95		157277	157183	2e-44	180
scf608	VI	99.158	<lmxll>,(ll,lm),ll,lm,lm,lm,lm,ll,ll,lm,ll,ll,LM,ll,ll,lm,ll,lm,lm,lm,ll,ll,lm,lm,ll,lm,LM,lm,lm,lm,lm,ll	TGCAGGGACCTGTTATTTATTATAATTTTTCTATCTACGTGGCTTTACCGAAAGACCCAAAGAATATGAATTCCTGCAGTCACGAAAGTTTGAAG	scaffold_608	100	95	0	0	1	95		84522	84428	1e-46	188
scf24864.1	VI	110.57	<lmxll>,(ll,lm),lm,ll,ll,ll,lm,lm,lm,ll,--,lm,ll,lm,--,ll,--,ll,lm,ll,--,lm,ll,ll,lm,ll,--,lm,--,lm,ll,lm	TGCAGGCCAAGTGTGCGCCTCCAGATGAGGCTGCGGGACAGCAGGACTCGGCCAGGACGTGTTTGCACAAGGCCAAGAAGGTAGCCACCCACACG	scaffold_24864	98.95	95	1	0	1	95		229190	229096	2e-44	180
scf2747	VI	118.705	<lmxll>,(ll,lm),lm,ll,ll,ll,ll,lm,lm,ll,lm,lm,ll,lm,lm,ll,lm,ll,lm,ll,lm,lm,ll,ll,lm,ll,lm,ll,ll,ll,ll,lm	TGCAGGCACTGTGAGGACACCCGCACTCCGCTCCTCCCTCGTTAGAGATGATCAGTTCATGAGCAGGGATTCGTCTCAGCCGGATCCGGCCAGAT	scaffold_2747	98.95	95	1	0	1	95		41544	41450	2e-44	180
scf9794	VI	118.705	<lmxll>,(ll,lm),lm,ll,ll,ll,ll,lm,lm,ll,lm,lm,ll,lm,lm,ll,lm,ll,lm,ll,lm,lm,ll,ll,lm,ll,lm,ll,ll,ll,ll,lm	TGCAGGTTAAATTATTCGGCAAGCGAGTGCACATCCATACTTGTACACGTGTACACATGCACACGTACGCTGGTGCTTGCTAACAATACTTGCCC	scaffold_9794	100	95	0	0	1	95		3701	3795	1e-46	188
scf3265	VI	119.038	<lmxll>,(ll,lm),--,ll,ll,ll,ll,--,--,ll,lm,--,ll,--,lm,ll,lm,ll,lm,ll,--,lm,ll,ll,--,--,lm,ll,ll,ll,ll,--	TGCAGGCCCAGCCGTTGGTTAGAGATTCCGTTGCCAGAGATGCCGTTGCTATGGATGCCGTTGCTAGGGATACCGTTGCTAGGGATACCGTTGCG	scaffold_3265	97.89	95	2	0	1	95		8818	8912	6e-42	172
scf15079	VI	120.194	<hkxhk>,(hh,hk,kk),kk,hk,hh,hk,hh,kk,kk,hk,hk,kk,hh,kk,hk,hk,hk,hk,hk,hk,kk,hk,hk,hk,kk,--,hk,hh,hh,hh,hk,kk	TGCAGGCAGCCATCCTTACCGTTGACCTGCCTGGCCCTGCTGCAAGTCCAAGGCCAAGACCCTCCTCTTCACCTCTACCCACGTTTCTTCTTCTT	scaffold_15079	98.95	95	1	0	1	95		7409	7503	2e-44	180
scf165.3	VI	120.194	<nnxnp>,(nn,np),nn,nn,np,nn,np,nn,nn,nn,np,nn,np,nn,np,nn,np,nn,np,nn,nn,np,nn,nn,nn,nn,np,np,np,np,nn,nn	TGCAGGGTCCATACATTTGTGTTCCAATGGATGAAATGTATTTTGATCAATTGTATATGCAGTCGGCACACTGCGGGGCCTGTAGCATAGTAAAG	scaffold_165	98.95	95	1	0	1	95		745169	745075	2e-44	180
scf2747.1	VI	120.194	<nnxnp>,(nn,np),np,np,nn,np,nn,np,np,np,nn,--,nn,np,nn,np,nn,np,nn,np,np,nn,np,np,np,np,nn,nn,nn,nn,np,np	TGCAGGGCAAACAAGCGTGATGATCATACTAATCATGACGTTCTGTATGTTGGCTCAGCAGCAGCAGAGTGAGTGGCTCGCAATTGCAAGGTTGC	scaffold_2747	100	95	0	0	1	95		45704	45798	1e-46	188
scf3095.1	VI	120.194	<nnxnp>,(nn,np),np,np,nn,np,nn,np,np,np,nn,np,nn,np,nn,NP,nn,np,nn,np,np,nn,np,np,np,np,--,nn,nn,nn,np,np	TGCAGGTTTTCAGTTTGATCTGCCCTCTTTATCTCTCCAAAGGTCTTCCACTTTGCATTCAGTGAAATTCTCAGCGATTAAAAGGAATGGCTCCA	scaffold_3095	100	95	0	0	1	95		25897	25803	1e-46	188
scf3095	VI	120.648	<efxeg>,(ee,ef,eg,fg),fg,eg,ee,eg,ee,fg,fg,eg,ef,fg,ee,fg,ef,eg,ef,eg,ef,eg,fg,ef,eg,eg,fg,fg,ef,ee,ee,ee,--,fg	TGCAGGCGAGTGGAAAAATCACGCACCAAGGAGCGGATAGACACCAAGCTCAAAAAACGACACCAGCAACAGTTCTGTGATGGGAAATGTCCTCG	scaffold_3095	100	95	0	0	1	95		21551	21457	1e-46	188
scf1214.1	VI	121.393	<lmxll>,(ll,lm),--,ll,ll,ll,ll,lm,lm,ll,lm,lm,ll,lm,lm,ll,lm,ll,lm,ll,lm,lm,ll,ll,lm,lm,lm,ll,ll,ll,ll,lm	TGCAGGGCAGCTGCAGAGAAGGTATTGGCGACGGTCTTACATTTTTCATTGGAGAAATTCCGCGCAAAAATGTACCTTTTATTTTTGCTTTAGTC	scaffold_1214	98.95	95	1	0	1	95		84616	84710	2e-44	180
scf3867.1	VI	121.496	<nnxnp>,(nn,np),np,np,nn,np,nn,np,np,np,nn,np,nn,np,nn,--,nn,np,nn,np,np,nn,np,np,np,np,nn,nn,nn,nn,np,np	TGCAGGGCCACAGTGACACTGGAAGTGATTTTTAAAATGAAATATTTTATATCGAAAACACATTATATGCCATAAACTTCACGCAGCACGTACCC	scaffold_3867	100	95	0	0	1	95		30833	30927	1e-46	188
scf3867.2	VI	121.496	<nnxnp>,(nn,np),np,np,nn,np,nn,np,np,np,nn,np,nn,np,nn,np,nn,np,nn,np,np,nn,np,np,np,np,nn,nn,nn,nn,np,np	TGCAGGCGCTGGCGATGGCCACGTCGGCACCATTCATTACGGCCTGGAACGTACCTTTTTACAGCTCATTTACGTCCGCATTAGCCGCCGACAGG	scaffold_3867	100	95	0	0	1	95		33330	33236	1e-46	188
scf1214	VI	122.344	<efxeg>,(ee,ef,eg,fg),--,eg,ee,eg,ee,fg,fg,eg,ef,fg,ee,fg,ef,eg,ef,eg,ef,eg,fg,ef,eg,eg,fg,fg,ef,ee,ee,ee,eg,fg	TGCAGGAACCCGCGACCAAAGGGAATAGCGGCGACGTCGGTGCTCGTCGCGAGGAATTCGTACATTCGGTATTGGCGCCCTTCATGTGGCGCGAG	scaffold_1214	98.95	95	1	0	1	95		4118	4024	2e-44	180
scf1227	VI	122.344	<lmxll>,(ll,lm),ll,ll,ll,ll,ll,lm,lm,ll,lm,lm,ll,lm,lm,ll,lm,ll,lm,ll,lm,lm,ll,ll,lm,lm,lm,ll,ll,ll,ll,lm	TGCAGGAACAAAGTCTAGATTAGATGACATTTTAGGTTACATTTTTCTGAAATATCACCGATATATATTCAATCTAAATGCATCGTGATTTCAGT	scaffold_1227	98.95	95	1	0	1	95		62960	62866	2e-44	180
scf136.1	VI	122.344	<lmxll>,(ll,lm),lm,lm,lm,lm,lm,ll,ll,lm,ll,ll,lm,ll,ll,lm,ll,lm,ll,lm,ll,ll,lm,lm,ll,ll,--,lm,lm,lm,lm,ll	TGCAGGGCCACTGTCCCGCGTTAAATCATCTGTCAGCGCCGTGTGCAGCTCCAGCACTGAGTCTGAGGATGCAAACCCATCAGCCCCGATGTGCA	scaffold_136	98.95	95	1	0	1	95		318610	318516	2e-44	180
scf2240	VI	122.344	<lmxll>,(ll,lm),ll,ll,ll,ll,ll,lm,lm,ll,lm,lm,ll,lm,lm,--,lm,ll,lm,ll,lm,lm,ll,ll,lm,lm,lm,ll,ll,ll,ll,lm	TGCAGGGACCAGAGCGCGGCTCCAACGAGACGGCACCACACACGTGGAGCAGCAGCCGTGCCTCGCGTGTTTACTCACCCAGTGGCCCATCCCCC	scaffold_2240	100	95	0	0	1	95		881	975	1e-46	188
scf3557	VI	122.344	<lmxll>,(ll,lm),ll,ll,ll,ll,ll,lm,lm,ll,lm,lm,ll,lm,lm,ll,lm,ll,lm,ll,lm,lm,ll,ll,lm,lm,lm,ll,ll,ll,ll,lm	TGCAGGTCGATGGCATCTACAGACTGAGTGGGAACCTCGCCTCAGTGCAAAAGCTGCGATACGCCATCGACCGAGGTGTGCCAGTAATTTACTCT	scaffold_3557	100	95	0	0	1	95		34853	34759	1e-46	188
scf3867	VI	122.344	<nnxnp>,(nn,np),np,np,nn,np,nn,np,np,np,nn,np,nn,np,nn,np,nn,np,nn,np,np,nn,np,np,np,np,nn,nn,nn,nn,np,np	TGCAGGGGCTATAATGAAATAGCTGAACGACGCTTCTCAGAAGCTAATTTTTTTGCAATAAAAAAAGCCAGGAGCATGGCTACTTAAGAGAAATA	scaffold_3867	100	95	0	0	1	95		30836	30742	1e-21	105
scf3249	VI	124.056	<hkxhk>,(hh,hk,kk),kk,kk,hk,kk,hk,hk,hk,kk,hh,hk,hk,hk,hh,kk,hh,kk,hh,kk,hk,hh,kk,kk,hk,hk,HK,hk,hk,hk,kk,hk	TGCAGGGCGTCCACGCTCCCTGCGTTCCCCATGGCTGGATGCCGAATCACCTCGTCCGGCCCGCGTGGGTCCGTTAGATATCGCCGGCTCTCCAC	scaffold_3249	100	95	0	0	1	95		913	819	1e-46	188
scf136	VI	124.335	<lmxll>,(ll,lm),ll,ll,ll,ll,ll,lm,lm,ll,lm,lm,ll,lm,lm,ll,lm,ll,lm,ll,lm,lm,ll,ll,lm,lm,lm,ll,ll,ll,ll,lm	TGCAGGGACCTGTTGTATGTTGAACTTCTTTCGCACCGTACGTAGCCAAACGTGCGTCTGGTCGGATAGCAGCTCACTCGCGCTGATGTCAATGC	scaffold_136	100	95	0	0	1	95		377354	377448	1e-46	188
scf1227.1	VI	135.984	<nnxnp>,(nn,np),nn,nn,np,nn,np,nn,nn,nn,np,nn,np,nn,np,nn,np,nn,np,nn,nn,np,nn,nn,nn,np,np,np,np,np,nn,nn	TGCAGGAAAAATACAGAATGCCATTATATTTGAAGTCTCTCAATTAAATTTTGATTTAAAGCTTTCGTGACTGCAGGGATTCATATTCTTGGTTC	scaffold_1227	98.95	95	1	0	1	95		11694	11788	2e-44	180
scf2344	VI	142.929	<hkxhk>,(hh,hk,kk),hk,hk,hh,hk,hh,hk,hk,hk,hk,hk,hh,hk,hk,hk,hk,hk,hk,hk,hk,hk,hk,hk,hk,hk,hk,hh,hh,hh,hk,hk	TGCAGGGCAGCACAAGGTGGCAGCACAAGGTGGCAGCCTGCAGCATTTTGCAGCAGCCGGTTATCCCGATTACCGACTTTCCCAAAATTTCAGGG	scaffold_2344	100	95	0	0	1	95		42960	43054	1e-46	188
scf418.2	VII	0	<nnxnp>,(nn,np),np,np,nn,np,nn,nn,np,nn,np,np,nn,nn,nn,np,np,nn,np,nn,nn,np,np,np,nn,np,np,np,nn,np,nn,np	TGCAGGTTCGGATTCAAGCGGCCAAGGCGACTGCCTCCTTCGTGCTGTCTCAGGAGCATCTGCCGGTCCAGAAGCACTTTGCAGACCTCCTGCCC	scaffold_418	100	95	0	0	1	95		12186	12280	1e-46	188
scf418	VII	0.256	<lmxll>,(ll,lm),LM,lm,ll,ll,lm,lm,ll,ll,lm,lm,ll,ll,lm,lm,lm,lm,ll,ll,lm,lm,ll,lm,ll,ll,lm,lm,lm,ll,lm,lm	TGCAGGTCCGCGCTCCCATCACGGCACCGCCAAGCGGCGACGCGGCGGTCCGGTCGACGACAATGTGCGACGTCGCCGGCGAGCGGCTAAGTGTC	scaffold_418	98.95	95	1	0	1	95		13177	13271	2e-44	180
scf418.1	VII	3.705	<lmxll>,(ll,lm),ll,lm,--,ll,lm,lm,ll,--,lm,lm,ll,ll,lm,lm,lm,lm,ll,ll,lm,lm,ll,lm,ll,--,lm,lm,lm,ll,lm,lm	TGCAGGCGGAAGAAAGCGTGGCTCTCTACGCAGCCCTTCCAGAAGGCCTTGCAAGCGTCTCGTCCCTTCATGCTGAACTCCAGGGTGTCCTGGTA	scaffold_418	98.95	95	1	0	1	95		216248	216154	2e-44	180
55474	VII	7.155	<efxeg>,(ee,ef,eg,fg),eg,fg,ee,eg,ef,fg,eg,ee,fg,fg,ee,ee,ef,fg,fg,ef,eg,ee,ef,fg,eg,fg,ee,eg,fg,fg,ef,ee,ef,eg	TGCAGGGACCTGTTACTGTCTGTTGTGTCCATTGCACGGCGCACACGCCATTGCGCACGATGCTGACGATTCACACCCGCGCGAGCCCCCCCACA
scf24939	VII	7.155	<nnxnp>,(nn,np),np,np,nn,np,nn,np,np,nn,np,np,nn,nn,nn,np,np,nn,np,nn,nn,np,np,--,nn,np,np,np,nn,nn,nn,np	TGCAGGAATGGGTCGCACGTGTGCCAAGACCGCTCCCCCAAAGGTGTGTTTGCCGTGTTTAGAACTTGGATAAATAGTTTCTAGTGGCGACAGAG	scaffold_24939	98.95	95	1	0	1	95		9147	9241	2e-44	180
scf10967	VII	10.044	<lmxll>,(ll,lm),lm,ll,lm,lm,ll,ll,lm,lm,ll,ll,lm,ll,ll,ll,ll,ll,lm,lm,ll,ll,lm,ll,lm,lm,ll,ll,ll,lm,ll,lm	TGCAGGTCGTGCACGCAGGTGTCCTGCTTCATGCTCCAGATCTGAGAACAATCAAAGTGCCCCGCGGTCAGATGGACAGCTGCCACCTCTTGTCC	scaffold_10967	98.95	95	1	0	1	95		7501	7407	2e-44	180
scf503	VII	10.044	<lmxll>,(ll,lm),lm,ll,lm,lm,ll,ll,lm,lm,ll,ll,lm,ll,ll,ll,ll,ll,lm,lm,ll,ll,lm,ll,lm,lm,ll,ll,ll,lm,ll,lm	TGCAGGGTGCAACCGTCGGACGTCTGAGTGTCGAGATCGTTTGGTTTGTCACGTGAGATGATGATCCCGTTCGCCGGTTGCCCGACTATTTTACA	scaffold_503	100	95	0	0	1	95		218082	218176	1e-46	188
scf11018	VII	16.035	<hkxhk>,(hh,hk,kk),hk,kk,hh,hk,hk,kk,hk,hh,hk,kk,hh,hk,hk,kk,kk,hk,hk,hk,hk,kk,hk,kk,hh,hk,kk,kk,hk,hh,hk,hk	TGCAGGGTATCCCAAGGACTGGTTCAGATAGTCATGAGCAGGAATCGAATTAGGTCGCCGGGTTAGTAGCGCATGGTATTAACCACTGTGCCACC	scaffold_11018	100	95	0	0	1	95		6241	6147	1e-46	188
scf2317	VII	16.035	<hkxhk>,(hh,hk,kk),hk,hh,kk,hk,hk,hh,hk,kk,HK,hh,kk,hk,hk,hh,hh,hk,hk,hk,hk,hh,hk,hh,kk,hk,hh,hh,hk,kk,hk,hk	TGCAGGTGGATCACAGACTTCCTGTCCGACAGGAAGCAGTGCACAAGTCTCTGACTCCAGGTCCATCAGCACCGGAACTCCTCCGGGCTGCGTCC	scaffold_2317	98.95	95	1	0	1	95		45202	45296	2e-44	180
scf2897.6	VII	16.035	<nnxnp>,(nn,np),nn,nn,np,nn,np,nn,nn,np,nn,nn,np,np,np,nn,nn,nn,nn,nn,np,nn,nn,nn,np,nn,nn,nn,np,np,np,nn	TGCAGGCAGTGCAGCCATGCCCTGTCCCCAGGGACCCACTGTTTGCCCGACACTCGCCGGACCTGGAAGCGTTCGTTGGCCCACTGCTTAGCGGC	scaffold_2897	100	95	0	0	1	95		477905	477811	1e-46	188
scf512	VII	16.035	<hkxhk>,(hh,hk,kk),hk,hh,kk,HK,hk,hh,hk,kk,hk,hh,kk,hk,HK,hh,hh,HK,hk,hk,HK,hh,hk,hh,kk,hk,hh,hh,hk,kk,hk,hk	TGCAGGTGTCGCACGCACGCTGAGGACGGCTGGCTTCTCTCCACCGCTCCAGAAGGACTCTCTCTCAAATTCTTCCTCCTCCCCCCTTATATGTC	scaffold_512	100	95	0	0	1	95		35710	35616	1e-46	188
scf6956	VII	16.035	<hkxhk>,(hh,hk,kk),hk,kk,hh,hk,hk,kk,hk,hh,hk,kk,hh,hk,hk,kk,kk,hk,hk,hk,hk,kk,hk,kk,hh,HK,kk,kk,hk,hh,hk,hk	TGCAGGCGCGTATTTCCCACTCACGCGCGTAACCACGCACGCCCCTACAGGCACTTATTTCGCACACACACGCGCGTAAACGCGCGAGCGTCGGA	scaffold_6956	98.95	95	1	0	1	95		575	669	2e-44	180
scf6956.1	VII	16.035	<lmxll>,(ll,lm),lm,ll,lm,lm,ll,ll,lm,lm,lm,ll,LM,ll,ll,ll,ll,lm,lm,lm,ll,ll,lm,ll,lm,lm,ll,ll,ll,lm,ll,lm	TGCAGGGGCGCGCGCGTGCACGCCTTCGCTTTTGTGGTGGTGTACGTGGGTTTGTGCGGGATAACCCCAGGCGGTGGTGAGCCAGCCAATTAGCT	scaffold_6956	100	95	0	0	1	95		578	484	1e-46	188
scf936	VII	17.76	<efxeg>,(ee,ef,eg,fg),ef,ee,fg,ef,--,ee,ef,fg,ef,ee,fg,eg,eg,ee,ee,ee,ef,ef,eg,ee,ef,ee,fg,ef,ee,ee,eg,fg,eg,ef	TGCAGGATCAATCGTCTGCGTTCATTTCCGACGCTTTCATTAATGGGTATGTCTTGGACAAGAGGGCCCCGGAACGTCTCCTTATGGACCAAGGC	scaffold_936	98.95	95	1	0	1	95		187128	187222	2e-44	180
scf10092	VII	19.485	<lmxll>,(ll,lm),--,ll,lm,--,ll,ll,--,lm,ll,ll,lm,ll,ll,ll,ll,ll,--,--,ll,ll,--,ll,lm,--,ll,ll,ll,lm,ll,--	TGCAGGGAAACGTGAAGACACAGGCCGCGGTACAACAGCACCATTGTGGCCGTGCAGCCCAAACTATGGACCCTATATAGTAAAGCTATAGAGAC	scaffold_10092	98.95	95	1	0	1	95		4122	4216	2e-44	180
scf1310	VII	19.485	<lmxll>,(ll,lm),--,ll,lm,lm,--,ll,lm,lm,ll,ll,lm,ll,ll,ll,ll,ll,lm,lm,ll,ll,lm,ll,lm,lm,ll,ll,ll,lm,ll,lm	TGCAGGCCTTGGGGCGGTGTCGGAGCGCAGCGCCTGGCTGCACGCCTCCCTGCTGGAGGAGAACGCTCCGTCTGCAGCGAGGCAGGTGGAGCGGC	scaffold_1310	100	95	0	0	1	95		70549	70643	1e-46	188
scf2897	VII	19.485	<hkxhk>,(hh,hk,kk),hk,kk,hh,hk,hk,kk,hk,hh,kk,kk,hh,hk,hk,--,kk,kk,hk,hk,hk,kk,hk,kk,hh,hk,kk,--,hk,hh,hk,hk	TGCAGGTCGATCCCAACCAGCTGATTCGTCCGGCTGATGCGGAACGGTCGAAGGGCTACCTGGTATCGCGCTGGTTTTGGCCCGCACTGCTGACA	scaffold_2897	97.89	95	2	0	1	95		482332	482426	6e-42	172
scf2897.1	VII	19.485	<lmxll>,(ll,lm),lm,ll,lm,lm,ll,ll,lm,--,ll,ll,lm,ll,ll,ll,ll,ll,lm,lm,ll,ll,lm,ll,lm,lm,ll,ll,ll,lm,ll,lm	TGCAGGACTCATTTACACTGCCACATGGCTTTGTTACCAAGTTCGGTTTTCCAAAAGTCACTCCACGTTGAGTTAACCGCCTCTAAACTATTGTT	scaffold_2897	98.95	95	1	0	1	95		613551	613457	2e-44	180
scf2897.4	VII	19.485	<lmxll>,(ll,lm),lm,ll,--,lm,ll,ll,lm,--,ll,ll,--,ll,ll,ll,ll,ll,lm,lm,ll,ll,lm,ll,--,lm,ll,ll,ll,--,ll,lm	TGCAGGTAAATAAGTTATATTTAAAAAATCTTTTTAAGAAACACGCTTTTATGAAATGTACTAGTAATGGCAGAACTCCACGACTCCAGGAAGTG	scaffold_2897	98.95	95	1	0	1	95		432366	432460	2e-44	180
scf2897.5	VII	19.485	<nnxnp>,(nn,np),nn,nn,np,nn,np,nn,nn,np,nn,nn,np,np,np,nn,nn,nn,nn,nn,np,nn,nn,nn,np,nn,nn,nn,np,np,np,nn	TGCAGGGGCGATTCCTGTGATCCCACCGGGGCAACCGATATATTCTCATAGCGGTGGAGTACTTCACACGCTACCCCGTAGCGGTGGCCATCCAC	scaffold_2897	100	95	0	0	1	95		482335	482241	1e-46	188
scf3414	VII	19.485	<hkxhk>,(hh,hk,kk),kk,hk,hk,kk,hh,hk,kk,hk,hk,hk,hk,hh,hh,hk,hk,hk,kk,kk,hh,hk,kk,hk,hk,kk,hk,hk,hh,hk,hh,kk	TGCAGGAGGACTCCTGCTGTGAGCTGCTCGTTGCTGCTCCTCACTCACTCTGCAAAACCCATGAAATGTATTCGCACACCTCTTAGCTTCTCTCA	scaffold_3414	98.95	95	1	0	1	95		7121	7027	2e-44	180
scf37	VII	19.485	<efxeg>,(ee,ef,eg,fg),fg,eg,ef,fg,ee,eg,fg,ef,eg,eg,ef,ee,ee,eg,eg,eg,fg,fg,ee,eg,fg,eg,ef,fg,eg,eg,ee,ef,ee,fg	TGCAGGGCTCCGATTGAAACCGATCATCCACTTACGGGCAACGCTTACGAGTTTATGCAATGTCTCATCGCAAAGTGCTCAGAGCCCCGGCAGCA	scaffold_37	97.89	95	2	0	1	95		556249	556343	6e-42	172
scf936.2	VII	19.485	<nnxnp>,(nn,np),nn,nn,np,nn,np,nn,nn,np,nn,nn,np,np,np,nn,nn,nn,nn,nn,np,nn,nn,nn,np,nn,nn,nn,np,np,np,nn	TGCAGGCGATTCATTTAACACACGCGCGAGCGTCGACGAGCGGGTTTAACGCACCCCGCCCTAATATTCGCGCGGCACGGCTGCACGAACGCGCG	scaffold_936	100	95	0	0	1	95		14990	14896	1e-46	188
scf2897.3	VII	37.498	<lmxll>,(ll,lm),lm,ll,--,lm,ll,ll,lm,--,ll,LM,--,ll,ll,ll,ll,ll,lm,lm,ll,ll,lm,ll,--,--,--,ll,ll,--,ll,lm	TGCAGGGAGGCTCAAGGCAGGAAAGGTCTGCAAGGTTGCTCTCTTGCTTCATTACTGTTGTTTACATTTTTATAAGCCGCAGCAGTCCCAACAAA	scaffold_2897	100	95	0	0	1	95		431219	431125	1e-46	188
scf5191	VII	37.498	<lmxll>,(ll,lm),--,ll,lm,--,ll,ll,--,ll,ll,--,lm,ll,ll,ll,ll,ll,--,lm,ll,ll,--,ll,lm,lm,ll,ll,--,--,ll,lm	TGCAGGCCACCCCGTTAATAAAATTACCGCAGGTGAATTCACCGTGAAATAATAATAATACATTCTATTTGTGAGCGCTTTTCTGAATACTCAGA	scaffold_5191	100	94	0	0	2	95		17964	17871	4e-46	186
scf2735	VII	49.051	<lmxll>,(ll,lm),lm,ll,lm,lm,ll,ll,lm,ll,ll,lm,lm,ll,ll,ll,ll,ll,lm,lm,ll,ll,lm,ll,lm,lm,ll,ll,LM,lm,ll,lm	TGCAGGTCAGCCTGTTATTATATCATTATAATTTAGCTCATTCGGCCAGAAAAGCCTCGCTTGATGAAATTCTCTTTCTTTCAGGAGGGTCCTGC	scaffold_2735	98.95	95	1	0	1	95		15343	15249	2e-44	180
scf11946	VII	67.233	<lmxll>,(ll,lm),lm,ll,lm,lm,ll,ll,ll,ll,ll,lm,lm,ll,ll,ll,ll,ll,lm,lm,ll,ll,ll,ll,--,lm,ll,ll,lm,lm,ll,ll	TGCAGGGGCGCGCGCGTGCACGCAGGGGAGGGGCACGTGCACGTGCACGCCACCGCGTTCGCTTTTGTGGTGGTGTACGTGGGCGAGGTAACTCC	scaffold_11946	100	95	0	0	1	95		7380	7474	1e-46	188
scf129	VII	92.455	<hkxhk>,(hh,hk,kk),kk,hh,hk,kk,hh,hk,kk,hk,hh,kk,HK,hk,hk,hh,hh,hk,kk,hk,hh,hh,kk,hk,hk,hk,hk,hh,kk,kk,hh,hk	TGCAGGAGTCCACCAGATGGCCTCGTAGTCCTACAAATATAGACGCACTCCACAACACTGATCACCACACATTACTTCCCTGTATCACCACAACA	scaffold_129	100	95	0	0	1	95		375991	375897	1e-46	188
scf985.1	VII	92.455	<lmxll>,(ll,lm),lm,ll,lm,lm,ll,ll,lm,ll,ll,lm,lm,lm,ll,ll,ll,ll,lm,lm,ll,ll,lm,ll,lm,lm,ll,ll,lm,lm,ll,lm	TGCAGGGCTGCTGGGCAGCCAGTAGATGGCAGTGCTAGGTGAGATACCAAAGCAAAGTATATTAATCATCTAGCCATGAATATTTTTTGTAAAGT	scaffold_985	98.95	95	1	0	1	95		253248	253154	2e-44	180
scf2957	VII	93.317	<lmxll>,(ll,lm),ll,lm,ll,ll,lm,lm,ll,lm,lm,ll,ll,ll,lm,lm,lm,lm,ll,ll,lm,lm,ll,lm,ll,ll,lm,lm,ll,ll,lm,ll	TGCAGGTGAGTTTGTGGCATGGGCAGCGAGAAGAACACGTCTACTGGCCCATGCGTCCTCGCAAGCCTTCTCCCAAGTGCGGCCGATCACATTTC	scaffold_2957	98.95	95	1	0	1	95		8638	8732	2e-44	180
33663	VII	94.18	<efxeg>,(ee,ef,eg,fg),ef,eg,fg,ef,eg,ee,ef,ee,eg,ef,fg,ef,ee,eg,eg,ee,ef,fg,eg,eg,ef,ee,fg,fg,ee,eg,ef,ef,eg,fg	TGCAGGATGTAGCTGAAAACGATTGCAGAGGCAAAGTCTCCGAGGCGGGCATCTTCCCCAACCCCCATCGTGCAGCTGAATAGGTACGGGGGAGG
scf129.2	VII	94.18	<nnxnp>,(nn,np),nn,np,--,nn,np,nn,nn,nn,np,nn,--,nn,nn,np,np,nn,nn,--,np,np,nn,nn,--,--,--,np,nn,nn,np,--	TGCAGGTTTGCTCCCATAGCAAAAAAAAACGTGACTGCTATTGGCTAAACATCAAGATGCTGAAATTTAGCTGCAAATTACTCATTACACTATAT	scaffold_129	100	95	0	0	1	95		22379	22285	1e-30	135
scf2397	VII	94.18	<nnxnp>,(nn,np),nn,np,--,nn,np,nn,nn,nn,np,nn,--,nn,nn,np,np,nn,nn,--,np,np,nn,nn,--,--,nn,np,nn,nn,np,--	TGCAGGTGTAGGAACCTTTGAAATGCTTCACGCTATCTGCTGCGGAGTGGATTTCAAAGATTCCGTGATGTAATTTGCAAGAGTAGGCCATCGTG	scaffold_2397	100	95	0	0	1	95		7251	7157	1e-46	188
scf985	VII	95.904	<hkxhk>,(hh,hk,kk),hh,kk,hk,hh,kk,hk,hh,hk,kk,hh,hk,hh,hk,kk,kk,hk,hh,hk,kk,kk,hh,hk,hk,hk,hk,kk,hh,hh,hk,hk	TGCAGGTGGGGGAAGGTGTCATGTACGCCAAGGTTGCAACATCTGCACGATCCACCAACCTTGTGCCTCCAAGTCGCTGGATTATAGGTGTGCAC	scaffold_985	100	94	0	0	1	94		263842	263749	4e-46	186
scf985.2	VII	98.19	<nnxnp>,(nn,np),np,nn,nn,nn,nn,np,NP,np,nn,np,nn,np,np,nn,nn,np,np,nn,nn,nn,np,np,nn,nn,np,nn,np,np,np,nn	TGCAGGTTACGACTGGCATGATCCACTGACTGCTGCCTCCAGAGCAAATGGGGTGGCACTACTGCACATAAAACCATTGTGACGCTGGGCTGATA	scaffold_985	98.95	95	1	0	1	95		253245	253339	2e-44	180
scf2027	VII	102.932	<hkxhk>,(hh,hk,kk),hh,kk,hh,hh,kk,hk,hh,hh,kk,hh,hk,hh,hk,kk,kk,hk,hh,hk,kk,kk,hh,hk,hk,hk,hk,kk,hh,hh,hk,hk	TGCAGGAGTCTATAATACCTTTTTCACTGCAGGGTGGTCACCCAAACACTATCCAACTTTAACCCTACTTAGCTTCCGAAATCTGCTGATAATGT	scaffold_2027	100	95	0	0	1	95		25423	25329	1e-46	188
scf830	VII	102.932	<hkxhk>,(hh,hk,kk),hh,kk,hh,hh,kk,hk,hh,hh,kk,hh,hk,hh,hk,kk,kk,hk,--,hk,kk,kk,hh,hk,hk,hk,hk,kk,hh,hh,hk,hk	TGCAGGATCCGGCAATGGAAGGTGAAAGACAAGTGAACCCAAGGCCGGGCAAGGTACGACTGGAGCGTCGCTTTTACGCTGTAACGTTACTGCCA	scaffold_830	98.91	92	1	0	1	92		73032	73123	1e-42	174
scf2027.1	VII	104.683	<hkxhk>,(hh,hk,kk),hh,kk,hh,hh,--,hk,hh,hh,kk,hh,hk,hh,hk,kk,kk,HK,hh,hk,kk,kk,hh,hk,hh,--,--,kk,hh,hh,hk,HK	TGCAGGGTGGTCACCCAAACACTATCCAACTTTAACCCTACTTAGCTTCCGAAATCTGCTGATAATGTCGTCGATGGTACTCAACCCCATTCAAG	scaffold_2027	100	95	0	0	1	95		25396	25302	1e-46	188
scf2397.1	VII	106.886	<nnxnp>,(nn,np),nn,np,--,nn,np,nn,nn,nn,np,nn,--,nn,nn,np,np,nn,nn,--,np,np,nn,nn,--,--,nn,np,nn,nn,np,--	TGCAGGGTTAATTGGAGGCACCCGGTAGATTCGAACCATGAATCTCTGTGACAATATGCGAACGCGCGACTGCATAGCAGTGTTCACCGCCTAAT	scaffold_2397	100	95	0	0	1	95		7248	7342	1e-46	188
scf2914	VII	114.211	<nnxnp>,(nn,np),nn,nn,nn,nn,np,nn,nn,nn,nn,nn,np,nn,nn,NP,np,nn,nn,np,np,np,nn,nn,np,np,nn,np,nn,nn,nn,np	TGCAGGGGTTGTAGCATGTTTTAATCGCACGTATGAATGTTTACATACTGTTTGGGGAGCGGTGGCTTAGTGGTTAGCGCACTGCATCGTGACAT	scaffold_2914	100	95	0	0	1	95		18478	18384	1e-46	188
scf8088	VII	114.211	<hkxhk>,(hh,hk,kk),kk,hk,kk,kk,hh,hk,--,kk,hk,kk,hk,kk,hk,hh,hh,hk,kk,hk,hh,hh,kk,hk,hk,hk,hk,hh,kk,kk,hk,hk	TGCAGGTGCCATGGGTTGGCTGACTGAGATGACTGGTAGATGCACCACCAGCTGTACCCCCTACTGTGCCAACTCGCTGTATTTTATCCGCCCGG	scaffold_8088	96.81	94	3	0	2	95		6359	6452	6e-39	163
scf2635	VII	117.661	<lmxll>,(ll,lm),ll,lm,ll,ll,lm,lm,ll,ll,lm,ll,ll,ll,lm,lm,lm,lm,ll,lm,lm,lm,ll,lm,ll,ll,lm,lm,ll,ll,lm,ll	TGCAGGGACCTGTTTTTCGCACCGTACGTAGAGCCAATCGTGTTCGATGCTGCCATGGGCGCGAGGCACGGATCCATGTCCTCTGGTGGTGGGAG	scaffold_2635	98.91	92	1	0	1	92		2173	2082	1e-42	174
scf892	VII	117.661	<efxeg>,(ee,ef,eg,fg),eg,fg,eg,ee,ef,fg,eg,eg,fg,eg,ee,eg,fg,ef,ef,fg,eg,ef,ef,ef,eg,fg,ee,ee,fg,ef,eg,eg,fg,ee	TGCAGGTTGCTTGAGGGGCAGCCTTTCGAACTTATTAGCCACACCGCGTTTAAATCCAATAAAATTTGTTTTATAGATTTGTGGCGCCCATTGGA	scaffold_892	96.84	95	3	0	1	95		17448	17354	1e-39	165
9770	VII	119.404	<efxeg>,(ee,ef,eg,fg),eg,--,eg,ee,ef,fg,eg,eg,--,eg,ee,ee,fg,ef,ef,fg,eg,ef,ef,ef,eg,fg,ee,ee,--,ef,eg,eg,--,ee	TGCAGGGCCGCACAAGTTGACAGCCATCATTTTGCAGCAGCCGGAAATCCGGTTATCCAGATTACTGACTCCCAAAATTTCATGGGGGGCTGAGC
scf4968	VII	121.146	<nnxnp>,(nn,np),np,np,np,nn,nn,np,np,np,np,np,nn,np,np,nn,nn,np,np,nn,nn,nn,np,np,nn,nn,np,nn,np,np,np,nn	TGCAGGGAATCTGAAACAATACAAAGCAAAAGCATCGACGATTCAAGCTCGGAAGCCACCGGCTTTGAGGCAGCGTTGGTGGATCACGCGGGCGA	scaffold_4968	100	95	0	0	1	95		1963	2057	1e-46	188
28030	VII	122.871	<efxeg>,(ee,ef,eg,fg),eg,fg,eg,ee,fg,fg,eg,eg,fg,eg,ee,eg,fg,ef,ef,fg,eg,ef,ef,ef,eg,fg,ee,ee,fg,ef,eg,eg,fg,ee	TGCAGGCGGTGGACAAGAGCGGAGCTTCCCGCTCACATTTGCATTCGGCGAACAGAACATCGGTAAAACAACAACAACAAAACCTCAATATTTCA
scf4685	VII	126.449	<hkxhk>,(hh,hk,kk),hk,hh,hk,kk,hh,hh,hk,hk,hh,hk,kk,hk,hh,hk,hk,hk,hk,hh,hk,hk,hk,--,kk,kk,hh,hk,hk,hk,hh,kk	TGCAGGGGGCCACTGGACTGGCTTCACCTGCACTAGCTCTCATCAGCAAGGCGGCGTGGGTGAGCTCGTAAGCCACCGCCACTGGTGTGCCTTAA	scaffold_4685	98.95	95	1	0	1	95		18197	18103	2e-44	180
scf4685.1	VII	126.449	<nnxnp>,(nn,np),np,np,np,nn,np,np,np,np,np,np,nn,np,np,nn,nn,nn,np,np,nn,nn,np,np,nn,nn,np,nn,np,np,np,nn	TGCAGGTGGGGCACCTTGTGCGTATGATCTCTGAGAGACACAGCAACCCCGCTCTGAACCACTCCCCTACCAGAGAGCACGCTTGTTGGAAGCCG	scaffold_4685	100	95	0	0	1	95		18194	18288	1e-46	188
scf2968	VII	128.218	<efxeg>,(ee,ef,eg,fg),eg,fg,eg,ee,fg,fg,eg,eg,fg,eg,ee,eg,fg,ef,ef,ef,eg,fg,ef,fg,--,fg,ee,ee,fg,ef,eg,eg,fg,ee	TGCAGGAATATCCTTAGCTTTAAAGTCAACGCAGCCATTCTTTCGCACCGTACGTAGCCAATCGTGCTAATCGGGGGTGTGGGGAAGCACAACAA	scaffold_2968	96.84	95	2	1	1	95		37324	37231	3e-37	157
scf8430	VII	139.376	<lmxll>,(ll,lm),ll,lm,lm,ll,lm,lm,ll,ll,ll,ll,ll,ll,lm,lm,lm,lm,ll,lm,lm,lm,ll,lm,ll,ll,lm,lm,ll,ll,lm,lm	TGCAGGCGACGCGATCAGGTAGCGTAGACGACGGTGACGGCGGCGACGCGCGGTTTCATTCCTTTGCAGGCGAAGCGTGCCGGAACTAGCGGCGG	scaffold_8430	98.95	95	1	0	1	95		1925	2019	2e-44	180
scf8572	VIII	0	<nnxnp>,(nn,np),--,nn,nn,--,nn,nn,NP,np,nn,--,np,--,np,np,--,nn,nn,NP,--,--,nn,nn,np,NP,NP,np,nn,nn,NP,--	TGCAGGTCAGCTCCGTCTGAAGCGGTAAATAGAGCTTGCCTAATGCGAGAGCAGGAGTAGTAGCTGGCCACCCACCGAGCTCCCCTCCCTCCCTT	scaffold_8572	100	95	0	0	1	95		5871	5777	1e-46	188
scf1105	VIII	0.553	<nnxnp>,(nn,np),nn,--,--,--,np,np,--,--,np,--,--,nn,nn,nn,nn,np,NP,nn,nn,nn,np,np,nn,nn,nn,nn,np,NP,nn,nn	TGCAGGTTAAATTTTGATTTGAAGCTTTCGTGACTGCAGGGATTCATATTCTTGGTTCTTTCGGTAAAGTCACACCTGGTGATGATTGCTTGTGT	scaffold_1105	97.89	95	2	0	1	95		31483	31577	6e-42	172
scf2339	VIII	12.255	<hkxhk>,(hh,hk,kk),kk,hk,hh,kk,hh,hh,hk,hk,hh,hk,hk,kk,hk,kk,kk,hh,--,hk,kk,kk,hh,hh,hk,hk,hk,hk,hh,hh,hk,kk	TGCAGGCCCAACCTCTTCTACTTTTTGTGCAAATTTATAAAGGTCAGCTTACTGGAGTTCTTCGGTTTGACTGATGGGGGTGTTTATTGGAATGA	scaffold_2339	97.85	93	2	0	1	93		18986	19078	9e-41	168
scf10493	VIII	15.894	<efxeg>,(ee,ef,eg,fg),fg,ee,ee,fg,ee,ee,ef,eg,ee,ef,ef,fg,eg,ef,--,ee,ee,eg,fg,fg,ee,ee,eg,eg,ef,eg,ee,ee,eg,fg	TGCAGGCCCCCGCACAACGGCGCGCATCTCCCGAGGCCTATCGCGAGCCTTCTAACGCCCCGTCTCAGCCACTATCCACACAATTGTTACCGCAG	scaffold_10493	98.95	95	1	0	1	95		6692	6786	2e-44	180
scf2182	VIII	17.619	<efxeg>,(ee,ef,eg,fg),fg,ee,ee,fg,ee,ee,ef,eg,ee,fg,--,fg,eg,ef,fg,ee,ee,eg,fg,fg,ee,ee,eg,eg,--,eg,ee,ee,eg,fg	TGCAGGAATGGTTCAGCTATCACTCACCACTGACGGTATCCGTCACCTGGAATCGAACTCAGTGCGTCAACCGCTGGGCCACCGCTGCCCGTGCA	scaffold_2182	97.89	95	2	0	1	95		41370	41464	6e-42	172
scf2182.1	VIII	17.619	<nnxnp>,(nn,np),np,nn,nn,np,nn,nn,nn,np,nn,np,nn,np,np,nn,np,nn,nn,np,np,np,nn,nn,np,np,nn,np,nn,nn,np,np	TGCAGGAATAACCAGGGCAGCCTGCCCGATTCGAACCTCTGCGCCGTCCCCGCGTCTCCACCCAAACACCACTTCCTTCCCGACGCACCACATCG	scaffold_2182	97.89	95	2	0	1	95		24366	24272	6e-42	172
scf2182.2	VIII	17.619	<nnxnp>,(nn,np),np,nn,nn,np,nn,nn,nn,np,nn,np,nn,np,np,nn,np,nn,nn,np,np,np,nn,nn,np,np,nn,np,nn,nn,np,np	TGCAGGGGTAATAGCCGTGCAGAGACACGGTGGGCGTTAAAGACCATCTGACGAGGTCATTTGAAAACGACGTCAGCTGTTGTGTGCCGGCGTCA	scaffold_2182	97.89	95	2	0	1	95		24363	24457	6e-42	172
scf5259	VIII	21.197	<hkxhk>,(hh,hk,kk),hh,kk,kk,hh,kk,kk,hk,hk,kk,hh,hk,hh,hk,hk,hh,kk,kk,hk,hh,hh,kk,hk,hk,kk,hk,hk,kk,kk,hk,hh	TGCAGGAATGAGTCATGCTTTGTCCTTGCACAGGGGTGGAGACAAGCTGGCCAAGCCCAGCGACTGAATTCAACTCGATTAAACATGCCCTGGAA	scaffold_5259	97.89	95	2	0	1	95		12441	12535	6e-42	172
scf9087	VIII	22.353	<lmxll>,(ll,lm),lm,ll,ll,lm,ll,ll,lm,ll,ll,lm,lm,lm,ll,lm,lm,ll,ll,ll,lm,lm,ll,ll,ll,ll,lm,ll,ll,ll,ll,lm	TGCAGGTGTAGCCGCCTGTAACACAGAACGGGAGAGAGAAACGGTGTGAACACTAAAATATAGAGCGTGTTCGTATCTGCGCCGAACTCTTTCTG	scaffold_9087	97.89	95	2	0	1	95		3413	3319	6e-42	172
scf96.3	VIII	22.353	<lmxll>,(ll,lm),lm,ll,ll,lm,ll,ll,lm,ll,ll,lm,lm,lm,ll,lm,lm,ll,ll,ll,lm,lm,ll,ll,ll,ll,lm,ll,ll,ll,ll,lm	TGCAGGAGGCAGTACACGAAGTAGGTTGCTGACGTATTTGGACAATGTTCTTTACACGTTTCATCGGTTTTCTTTGGGCACTGCGGTTTCCGCCC	scaffold_96	100	95	0	0	1	95		102477	102383	1e-46	188
scf420	VIII	23.509	<hkxhk>,(hh,hk,kk),hh,kk,kk,hh,kk,kk,hk,hk,kk,--,hk,hh,hk,hk,hh,kk,kk,hk,hh,hh,kk,kk,hk,kk,hk,hk,kk,kk,hk,hh	TGCAGGCTCCTGTTGCCACCATGTACGGTGCGTACGCGAGCCAACGCTCAACTGCTGCTGCCATACATCACGTGGCCATTGTGGCCATGTGCGCC	scaffold_420	100	95	0	0	1	95		328734	328828	1e-46	188
scf96.1	VIII	28.45	<efxeg>,(ee,ef,eg,fg),fg,eg,ee,--,ee,ee,ef,eg,ee,ef,ef,fg,eg,fg,--,ee,ee,eg,fg,fg,ee,ee,eg,ee,ef,eg,ee,ee,eg,fg	TGCAGGCACTTCGCTGCACTGCCAGTGGACACATCACTCACACGACCTCCGCGCGACCCATCAGCCGTACCTCCGCGTCGGTGTATCACGCACGT	scaffold_96	98.95	95	1	0	1	95		102474	102568	2e-44	180
scf5562	VIII	30.201	<nnxnp>,(nn,np),np,np,nn,np,nn,nn,nn,np,nn,nn,nn,np,np,np,np,nn,nn,np,np,np,nn,nn,np,np,nn,np,nn,nn,np,np	TGCAGGAACGATGTGAACACTGACAGCCCTTCCCTGAGTCTCACAGAGCCCTCAAGAGTCCATGCCAGGGTAGTCACCGTGCTTTGGAAAATTTG	scaffold_5562	100	95	0	0	1	95		840	934	1e-46	188
scf6195.1	VIII	30.201	<hkxhk>,(hh,hk,kk),kk,hk,hh,kk,hh,hh,hk,hk,hh,hk,hk,kk,hk,kk,kk,hh,hh,hk,kk,kk,hh,hh,hk,hk,hk,hk,hh,hh,hk,kk	TGCAGGACCTTCAGGCATCCGAGACGCACTTCGCTGGACGCCCGATGGGGCCCTCCCTCCTCGACAACCCTCAGAACACGGTAGGGGAACGTGGC	scaffold_6195	100	95	0	0	1	95		24291	24385	1e-46	188
scf6195.2	VIII	30.201	<hkxhk>,(hh,hk,kk),kk,hk,hh,kk,hh,hh,hk,hk,hh,hk,hk,kk,hk,kk,kk,hh,--,hk,kk,kk,hh,hh,hk,hk,hk,hk,hh,hh,hk,kk	TGCAGGTCCAGCTCCAGGTCGAGCGACGTCCGCCCGGGCCCCTCCACCCGCGGCACCATCAGCACCGACTGCAGGCCCCAGACCCCGCCACGCGA	scaffold_6195	100	95	0	0	1	95		29775	29681	1e-46	188
scf6195.3	VIII	30.201	<hkxhk>,(hh,hk,kk),hh,hk,kk,hh,kk,kk,hk,hk,kk,hk,hk,hh,hk,hh,hh,kk,kk,hk,hh,hh,kk,kk,hk,hk,hk,hk,kk,kk,hk,hh	TGCAGGCTCAGGAGGTTGTACCAGCATCCAGAAGATGACAAAACGCTCTGGTGGGCCAAGCTGATCTGAGCCATACCCTGCAGCATGGAATGCAC	scaffold_6195	97.89	95	2	0	1	95		24294	24200	6e-42	172
scf96.2	VIII	30.201	<lmxll>,(ll,lm),lm,ll,ll,lm,ll,ll,lm,ll,ll,lm,lm,lm,ll,lm,lm,ll,ll,ll,lm,lm,ll,ll,ll,ll,lm,ll,ll,ll,ll,lm	TGCAGGGAGTGGCCGGCGCTGGCCATCTCGGAGTGGCCGCCTGACTTGCCGCTGACCGCTGCGCCTGACGAAACGAGACCGCGCGCATTCGTATT	scaffold_96	98.95	95	1	0	1	95		88063	87969	2e-44	180
scf96.6	VIII	31.419	<nnxnp>,(nn,np),np,np,nn,np,--,nn,nn,np,nn,nn,nn,np,np,np,np,nn,nn,np,np,np,nn,nn,np,NP,nn,np,nn,nn,np,np	TGCAGGCTCTTGATCGTGCCACCATCCCGCATCACGCCGTCACCCAACAGGGGGGCGGAGGCGGCCGTTGACAGGGTCTTGCCCTCCGTCTTCGC	scaffold_96	100	95	0	0	1	95		95023	94929	1e-46	188
scf1257	VIII	31.926	<lmxll>,(ll,lm),lm,--,ll,lm,ll,ll,lm,ll,ll,lm,lm,ll,ll,lm,lm,ll,ll,ll,lm,lm,ll,--,ll,ll,lm,ll,ll,ll,ll,lm	TGCAGGAGTATGAGCAGAAGGAGTTTCTGGATTACAGGTGAGGCATGTTTGTGACCACATAGCCTTTTTATTGGCCTATGATACTTTGTGTGCTT	scaffold_1257	100	95	0	0	1	95		34388	34482	1e-46	188
scf1257.1	VIII	31.926	<lmxll>,(ll,lm),lm,ll,ll,lm,ll,--,lm,ll,ll,lm,lm,ll,ll,lm,lm,ll,ll,ll,lm,--,ll,ll,ll,ll,lm,ll,ll,ll,ll,lm	TGCAGGGCACGGTAAACCTGCCCAGACACAAAGCGAGCGTTAGAGACGGTGCTCCCGGTCCTCTGAGGGGTTGCTTCCCATAAGCAGGTCTCAGT	scaffold_1257	100	95	0	0	1	95		34391	34297	1e-46	188
scf1480	VIII	31.926	<lmxll>,(ll,lm),lm,ll,ll,lm,ll,ll,lm,ll,ll,lm,lm,ll,ll,lm,lm,ll,ll,ll,lm,lm,ll,ll,ll,ll,lm,ll,ll,ll,ll,lm	TGCAGGGTTTTTATTATTCACGATGAGTTTGCTGTTAAAATAACCCCTTTAGGTACATTTCAAGAGATCGTACAGTTGATCCTCACTTTATTAAA	scaffold_1480	98.95	95	1	0	1	95		17722	17816	2e-44	180
scf266	VIII	31.926	<lmxll>,(ll,lm),lm,ll,ll,lm,ll,ll,lm,ll,ll,lm,lm,--,ll,lm,lm,ll,ll,ll,lm,LM,ll,ll,ll,ll,lm,ll,ll,ll,ll,lm	TGCAGGGACCTGTTATTAAATGTGTTTGCCTTGTCTGCGCAATATCATGAACATCCATCCAGCCATCCTACGTTTTTATTCACAACTCGACCCTT	scaffold_266	100	95	0	0	1	95		86427	86333	1e-46	188
scf266.1	VIII	31.926	<lmxll>,(ll,lm),lm,ll,ll,lm,ll,ll,lm,ll,ll,lm,lm,ll,ll,lm,lm,ll,ll,ll,lm,lm,ll,ll,ll,ll,lm,ll,ll,ll,ll,lm	TGCAGGTTGACGTCACGTCCATGCCAGCTACATCTTCCTTTTATCCACCAGCTCTGCATCCATGCAACTGGAGTAAAGATAGCGAAGTGTGTCTG	scaffold_266	98.95	95	1	0	1	95		173532	173438	2e-44	180
scf71.6	VIII	31.926	<lmxll>,(ll,lm),lm,ll,ll,lm,ll,ll,lm,ll,ll,lm,lm,ll,ll,lm,lm,ll,ll,ll,lm,lm,ll,ll,ll,ll,lm,ll,ll,ll,ll,lm	TGCAGGGACCTGTTCCTGGTATGCGTTCCTAGACTAGCAAAAGGCATTTGGTTCCGTGTAGATTGATGCAGCCATTGAGGTGCTCACAAACCAAG	scaffold_71	100	95	0	0	1	95		4647783	4647877	1e-46	188
scf8842	VIII	31.926	<lmxll>,(ll,lm),lm,ll,ll,lm,ll,ll,lm,ll,ll,lm,lm,ll,ll,lm,lm,ll,ll,ll,lm,LM,ll,ll,ll,ll,lm,ll,ll,ll,ll,lm	TGCAGGAATCAAAACTCCAAAATGAGTGCAGTAGGAATGGCACGCCCTGGAAAACGCGTATCACTCTGTCACAGTGCCTGATGGCTGCTGTCATA	scaffold_8842	100	95	0	0	1	95		10406	10500	1e-46	188
scf96	VIII	32.636	<efxeg>,(ee,ef,eg,fg),--,eg,ee,--,ee,ee,ef,eg,ee,ef,ef,--,eg,--,--,ee,ee,eg,--,--,--,ee,eg,eg,ef,eg,ee,ee,eg,--	TGCAGGAGGTGGTGTGCGTACGTCTGCGTGCGCACGTCCCCGACGCCGGCACGCCCAGTGACTCACGGGAGTGCTTGAGCTGCTCGTCAGCCTTG	scaffold_96	100	95	0	0	1	95		79080	78986	1e-46	188
scf96.5	VIII	32.636	<nnxnp>,(nn,np),np,np,nn,np,nn,nn,nn,np,nn,nn,nn,np,np,np,np,nn,nn,np,np,np,nn,nn,np,np,nn,np,nn,nn,np,np	TGCAGGCTCTCATCCTTAATGCGCCGGGACCGGGTTTTCACCGTTAATTTAACCGTATCGTTAGATGTCCCGTCATGGGGAAGCCTTTTTGTGCA	scaffold_96	100	95	0	0	1	95		79077	79171	1e-46	188
scf96.7	VIII	32.636	<nnxnp>,(nn,np),np,np,nn,np,nn,nn,nn,np,nn,nn,nn,np,np,np,np,nn,nn,np,np,np,nn,nn,np,np,nn,np,nn,nn,np,np	TGCAGGTTCAGGGACTGAAAGTTTCTTAGTCACCCGTGTGCGAGCGCGTGCAGTGTACATCTGTGTAACTGTAGTGGTGGCATCGTGGGGCGTGC	scaffold_96	100	95	0	0	1	95		158059	157965	1e-46	188
scf2473	VIII	36.505	<lmxll>,(ll,lm),--,lm,lm,ll,lm,lm,ll,lm,lm,ll,ll,ll,lm,ll,ll,lm,lm,lm,ll,ll,ll,lm,lm,lm,--,lm,lm,lm,lm,ll	TGCAGGTAAGTGTACACAGCCCATCAACATCGCTACAGTAGCATGTGAGGAAGCCAAACATTCTGAGTTGTGCAAATGCTAACATTCACAACTGA	scaffold_2473	98.95	95	1	0	1	95		63848	63942	2e-44	180
scf96.4	VIII	36.505	<lmxll>,(ll,lm),ll,lm,lm,ll,lm,lm,ll,lm,lm,ll,ll,ll,lm,ll,ll,lm,lm,lm,ll,ll,ll,lm,lm,lm,ll,lm,lm,lm,lm,ll	TGCAGGCCACCCAACGTGAGGCACAGTGCTCGCATTCACTCTCCCCTCCCTGTGCGTATACTCAATGTTTTAAATAATAATGGCAATAAATGCCT	scaffold_96	98.95	95	1	0	1	95		220887	220793	2e-44	180
scf1002	VIII	38.887	<hkxhk>,(hh,hk,kk),HK,hh,hk,hk,hk,hk,kk,hh,hk,kk,kk,hk,hh,hk,hk,hk,hk,hh,hk,hk,kk,hk,hh,hh,hk,hh,hk,kk,hh,hk	TGCAGGCATCAGGTGATGGTGTCAGTGTCAGTCAATTCGCAGCGCTGTCGGATGGCTTTGTCGAAGAGAATGACCCCCATTGGCATTTCGTTCCT	scaffold_1002	98.95	95	1	0	1	95		36705	36799	2e-44	180
scf396.1	VIII	38.887	<lmxll>,(ll,lm),lm,ll,ll,lm,ll,ll,lm,ll,ll,lm,lm,lm,ll,lm,lm,ll,ll,ll,lm,lm,lm,ll,ll,ll,lm,ll,ll,lm,ll,lm	TGCAGGCATTGCACTCACGTTTTAGAGTTTTTATTATTGTGACTTTTGCTTCCAACATTTAACCAAAACATTAGAAATTCACATACGGTCGACAA	scaffold_396	100	95	0	0	1	95		504037	504131	1e-46	188
scf1531	VIII	41.775	<lmxll>,(ll,lm),ll,ll,ll,lm,ll,ll,lm,ll,ll,lm,lm,lm,ll,lm,lm,ll,ll,ll,--,lm,lm,ll,ll,ll,lm,ll,ll,lm,ll,lm	TGCAGGTCGACTCAGCCTCATATGAGTACCTGGTGCGGCGTGTAAACATCGCCAATGAGGAGACAAAGGCGGCCGGGCGTGTTTGATGGCCACCC	scaffold_1531	98.95	95	1	0	1	95		45599	45693	2e-44	180
scf1151	VIII	47.767	<lmxll>,(ll,lm),ll,lm,lm,ll,lm,lm,ll,lm,lm,ll,ll,ll,ll,ll,ll,lm,lm,lm,ll,ll,ll,lm,lm,lm,ll,lm,lm,ll,lm,ll	TGCAGGGCGGAAGGATATTGATATTAACAAACAAACAAAAACGTGAAGTCGACCAAAGTAGTGCAGATGCAACGTTGCAGTGGGAAGATGCGAGG	scaffold_1151	100	95	0	0	1	95		34359	34265	1e-46	188
scf11580	VIII	47.767	<lmxll>,(ll,lm),ll,lm,lm,ll,lm,lm,ll,lm,lm,ll,ll,ll,ll,ll,ll,lm,lm,lm,ll,ll,ll,lm,lm,LM,ll,lm,lm,ll,lm,ll	TGCAGGTTGTCGGTTGAACACCGTGTGGATGAGAAGAAAAAGTAGTAGTCTTCAGCTACTTCAACGTCAACCAAATGTAAAGTTAACCTGATCGC	scaffold_11580	100	92	0	0	1	92		1272	1181	6e-45	182
scf2102	VIII	47.767	<lmxll>,(ll,lm),lm,ll,--,lm,ll,ll,lm,ll,ll,lm,lm,lm,lm,lm,lm,ll,ll,ll,lm,--,lm,ll,ll,ll,--,ll,ll,lm,ll,lm	TGCAGGGTTGATAAATTGATGACCACTTTGTGGGGAATTCAACAGTGGTTGTCCTGTGGACACACCCTACTCCGGCATAGGAATGTGGAATTTCA	scaffold_2102	98.95	95	1	0	1	95		145618	145712	2e-44	180
scf2733	VIII	47.767	<hkxhk>,(hh,hk,kk),hk,hh,hh,hk,hk,hk,kk,hh,hh,kk,kk,hk,hk,hk,hk,hk,hk,hh,hk,hk,kk,hk,hh,hh,hk,hh,hk,kk,hh,hk	TGCAGGACATGACGGGACAAGACCGGCCATAGCCAACGAGCCGGTGGGGCCGCGACCGATGGTTCAACGAGGAGCTGCCCCGCAACGTTACGATT	scaffold_2733	98.95	95	1	0	1	95		20256	20162	2e-44	180
scf396	VIII	47.767	<lmxll>,(ll,lm),lm,ll,ll,lm,ll,ll,lm,ll,ll,lm,lm,lm,lm,lm,lm,ll,ll,ll,lm,lm,lm,ll,ll,ll,lm,ll,ll,lm,ll,lm	TGCAGGTGGCATAGGGAGGAGAAGAGAGCAGCCCGGCACAACCACCGCATTTTAAAAATATCGGCCCTTTAAAACAAATAAATCGCAAAAGTCTC	scaffold_396	100	95	0	0	1	95		224745	224651	1e-46	188
scf2650.1	VIII	48.629	<nnxnp>,(nn,np),np,np,np,np,nn,nn,nn,np,np,nn,--,np,np,np,np,nn,nn,np,np,--,nn,--,np,np,NP,np,nn,nn,np,np	TGCAGGCTCTGTGGCCTCGCTGTTCGCACGCGGGTTTTACAGCAGCTGTGGTGCGCTGCTGCTACACAGCAATTGAGGGTCTCCTGCCGAGACGC	scaffold_2650	100	95	0	0	1	95		1552	1458	1e-46	188
scf6997.1	VIII	48.629	<nnxnp>,(nn,np),np,np,np,np,nn,nn,nn,np,np,nn,nn,np,np,np,np,nn,nn,np,np,np,nn,nn,np,np,np,np,nn,nn,np,np	TGCAGGTGTGTGGTGAAACCCGTCGGCTGTAAAAACTTTCATACCAACAGTGGAGAGATCGTGGCTGATCATGTAGAATAACAGCCATGACTAAC	scaffold_6997	100	95	0	0	1	95		1609	1703	1e-46	188
scf1171	VIII	49.492	<hkxhk>,(hh,hk,kk),hk,kk,kk,hk,HK,hk,hh,kk,kk,hh,hh,hk,hk,hk,HK,hh,hk,kk,hk,hk,hh,hk,kk,kk,hk,kk,hk,hh,kk,hk	TGCAGGCGCGCGTCCCCACTGCAATTCAGACGGTGCCCACCGCCCGTGGCGACGATTCTTGCGAAAGCTTCGCCCCGGAGTCACAACGCGATGAT	scaffold_1171	98.95	95	1	0	1	95		2835	2741	2e-44	180
scf1617.1	VIII	51.216	<lmxll>,(ll,lm),ll,lm,lm,ll,lm,lm,ll,lm,lm,ll,ll,ll,ll,ll,--,ll,lm,lm,--,ll,ll,lm,lm,lm,--,--,lm,ll,lm,ll	TGCAGGTGGAGGATGCTCGCGTACAGCTCGCGCATGTCCGCCTCCTTATCACAGCACAGGTACCTGTGGGTGGTGGCAGAGAAACAATGAAACAG	scaffold_1617	100	95	0	0	1	95		48014	48108	1e-46	188
scf2650	VIII	51.216	<nnxnp>,(nn,np),np,NP,np,np,nn,nn,nn,NP,np,nn,nn,np,np,NP,np,nn,nn,np,np,np,nn,nn,np,np,np,np,nn,nn,np,np	TGCAGGAACTACAGCGTGGCGCTCATGGAGCCTGTATCTGACTGTCCTTGGCTGTGTAGTGCTCTGGAGTCTTCGTGATGCTCCACAAAAGCACT	scaffold_2650	98.95	95	1	0	1	95		3611	3517	2e-44	180
scf2666.1	VIII	51.216	<lmxll>,(ll,lm),ll,lm,lm,ll,lm,lm,ll,lm,lm,ll,ll,ll,ll,ll,ll,ll,lm,lm,ll,ll,ll,lm,lm,lm,ll,ll,lm,ll,lm,ll	TGCAGGGGTAGAGACATGGTCGAGAGAGAGAGGAGCGTCGGCGTTGTTAAAACGTGACCACACGCGTGTACCACAGCACTCGCTGCACACGCTCA	scaffold_2666	100	95	0	0	1	95		22189	22095	1e-46	188
scf765	VIII	51.216	<lmxll>,(ll,lm),ll,lm,lm,ll,lm,lm,ll,lm,lm,ll,ll,ll,ll,ll,ll,ll,lm,lm,ll,ll,ll,lm,lm,lm,ll,ll,lm,ll,lm,ll	TGCAGGATTCTCTTCTGTCTCCTCCTCATGGTGTCGTCTCAAGTGCTGTCTCAAAGTCGTTCCCTGCCTGTTCACTCTGAACTCCCCTCTCGCTG	scaffold_765	100	95	0	0	1	95		179504	179410	1e-46	188
scf2666	VIII	52.941	<hkxhk>,(hh,hk,kk),hk,kk,kk,hk,hk,hk,hh,--,kk,hh,hk,hk,hk,hk,hk,hh,hk,kk,hk,hk,hh,hk,kk,kk,hk,hk,hk,hh,kk,hk	TGCAGGCAGAATAAGTTGCATAACGGGACTGCATCGCTTCCATTTCAAACATTTGCCATAATGCGTAGCAGATTCTGTGCGCTGCATTGGTGTCT	scaffold_2666	98.95	95	1	0	1	95		5320	5226	2e-44	180
scf6997	VIII	53.808	<nnxnp>,(nn,np),NP,np,np,np,nn,nn,nn,np,np,nn,--,np,np,np,np,nn,nn,np,np,NP,nn,nn,np,np,np,np,nn,nn,np,np	TGCAGGCGTGGGGGCTGGCAGGCAGTCAGCGACAATCAGCCCACCTGCTCTCACATCGGCAGCACCATAGCACAGCTGCAAGCCAGACGGACGCG	scaffold_6997	100	95	0	0	1	95		8964	9058	1e-46	188
scf7938	VIII	54.675	<hkxhk>,(hh,hk,kk),hk,--,kk,hk,hk,hk,hh,kk,kk,hh,hk,hk,hk,hk,hk,hh,hk,kk,hk,--,hh,HK,--,--,hk,hk,hh,hh,kk,hk	TGCAGGCACGGGACACCACTTCCGTCACGATTAAAAATATATATAATCCCTACCCTGAATCACAATCTGGGGGTGGTACCCGGAGGCAGGGGTGG	scaffold_7938	100	95	0	0	1	95		159136	159230	1e-46	188
scf1617	VIII	58.262	<hkxhk>,(hh,hk,kk),hk,kk,kk,hk,HK,hh,hh,kk,kk,hh,hk,hk,hk,hk,hk,hh,hk,kk,hk,hk,hh,hk,kk,kk,hk,hk,hk,hh,kk,hk	TGCAGGCGGTGCGTGCTCATCCCCAGGTAAGAGGCGAGGTGGTGGGAGGCAGCTACGGGCTCCGCTCCGTTCTCCAGCTCCTTGACATAGCCGCC	scaffold_1617	100	95	0	0	1	95		19938	20032	1e-46	188
scf13353	VIII	61.712	<hkxhk>,(hh,hk,kk),hk,kk,kk,hk,hk,hk,hh,kk,kk,hh,hk,hk,hk,hk,hk,hh,hk,kk,hk,hk,hh,hk,kk,kk,hk,hk,hk,hk,kk,hk	TGCAGGACCCTTTGTGATGAACACGCAGGAGGAGATTGAGGAGGCCATCTCAGACTTCCGCAACGGAACCAACGGGTTCGAGCGAGCCAAGGGCT	scaffold_13353	100	95	0	0	1	95		328	422	1e-46	188
scf3236	VIII	61.712	<hkxhk>,(hh,hk,kk),hk,kk,kk,hk,hk,hk,hh,kk,kk,hh,hk,hk,hk,hk,hk,hh,hk,kk,hk,hk,hh,hk,kk,kk,hk,hk,hk,hk,kk,hk	TGCAGGGACCTGTTTGTTTTAGTTCGATGATCGAGGAGGAGTCTCCGCCGCTGACTCCACAGCGCCACGCCGCGGCTTCCTCACCCGGAACTCGG	scaffold_3236	98.95	95	1	0	1	95		23774	23868	2e-44	180
45097	VIII	63.437	<efxeg>,(ee,ef,eg,fg),--,eg,eg,fg,ee,ee,ef,eg,eg,ef,ee,fg,fg,fg,fg,fg,ee,eg,fg,--,ef,ee,eg,eg,fg,fg,ee,fg,eg,fg	TGCAGGCTCGCACAAAGACAAAGATCCCCCGTGTAGCCTCTAGTGCTGTTAGCGAGCACCTATTAAGGCCCGGAGCGACAAACGAGAGGGTGGTG
scf3356	VIII	65.161	<hkxhk>,(hh,hk,kk),hk,kk,kk,hk,hk,hk,hh,kk,kk,hh,kk,hk,hk,hk,hk,hk,hk,kk,hk,hk,hh,hk,kk,kk,hk,hk,hk,hk,kk,hk	TGCAGGTTCGACGTTTTCTAAATGACGCACTGCCTCAACGCTGGATATGTCACACGGGACCCCAAGACTTGGCGCTACACTCTTGGCCCCCAAAA	scaffold_3356	98.95	95	1	0	1	95		30327	30233	2e-44	180
scf6487	VIII	66.886	<hkxhk>,(hh,hk,kk),hk,kk,kk,HK,hk,hk,hh,kk,kk,hh,kk,hk,hk,hk,hk,hh,hk,kk,hk,hk,hh,hk,kk,kk,hk,hk,hk,hk,kk,hk	TGCAGGCCATGGTGAGGCTGTCTCCACTGCTTGTGGGGACGCGCGTATACCTACCTATATGTTTGAGGTCGCGCGCGTGTGTGGGCGTCGGCGAA	scaffold_6487	100	95	0	0	1	95		15759	15853	1e-46	188
scf461	VIII	68.856	<nnxnp>,(nn,np),np,np,np,np,nn,nn,nn,np,np,nn,np,np,np,np,np,nn,nn,np,np,np,nn,nn,np,np,np,np,nn,nn,np,np	TGCAGGCCGAGAGCCGACCCACGCATTGTTATTTCAACATACTTCACCACGCCGTTGGGTGCGTGTTGGTGGAGGGGAGGGAGGGCAGTGCTGGC	scaffold_461	100	95	0	0	1	95		51442	51348	1e-46	188
scf2335	VIII	80.762	<lmxll>,(ll,lm),lm,lm,lm,ll,lm,lm,ll,lm,lm,ll,lm,ll,ll,ll,ll,ll,lm,lm,ll,ll,ll,lm,lm,lm,ll,ll,lm,ll,lm,ll	TGCAGGGGTTGATAAAATCGCATACCCAAGACGTTCTGATGATTCAATTTGTGGCTGTCCTCCAGGAACCAGGACAGAATTTATCGTAGAAACGT	scaffold_2335	100	95	0	0	1	95		4288	4382	1e-46	188
scf11998	VIII	85.511	<hkxhk>,(hh,hk,kk),hh,hh,--,hk,hk,hk,kk,hh,hh,kk,hh,hk,kk,HK,--,kk,hk,hh,kk,HK,kk,hk,hh,hh,kk,kk,hk,--,hk,kk	TGCAGGCCAGGGACAGAATGCAACGCGGGGCCCTCTTATGCATTCGCTTCAAATAAATTGGCTCATTGTGGAGTCCTCTTGCTTGTGATATCTTG	scaffold_11998	97.89	95	2	0	1	95		6093	5999	6e-42	172
scf18943	VIII	101.431	<nnxnp>,(nn,np),np,np,np,np,nn,nn,nn,np,np,nn,np,np,np,np,np,np,nn,np,np,np,nn,nn,np,np,np,np,nn,np,nn,np	TGCAGGCAATGCATGCAATGATTAGCGAGGAAAACACGCGGTGGCAGAGGGAGACGGCTGGGAGGGAGGAAGGCGCTCGGGATGAATCGACGTAA	scaffold_18943	100	95	0	0	1	95		918	824	1e-46	188
scf18943.1	VIII	101.431	<nnxnp>,(nn,np),np,np,np,np,nn,nn,nn,np,np,nn,np,np,np,np,np,np,nn,np,np,np,nn,nn,np,np,np,np,nn,np,nn,np	TGCAGGTGCGTGTCGTGGTCGTGTAGCGGTTCGCGCGCTGCGCTTATGAACCCTGCGCCTTAGATTCTCGATTCCTGTTTGCGGCCAACATCGGT	scaffold_18943	100	95	0	0	1	95		946	1040	1e-46	188
scf2802.1	VIII	101.431	<nnxnp>,(nn,np),np,np,np,np,nn,nn,nn,np,np,nn,np,np,np,np,np,np,nn,np,np,np,nn,nn,np,np,np,np,nn,np,nn,np	TGCAGGTTCACAGCAGAGACACGCAATGTAAATAGCGCTATCTCTGGCTGGATAACAATGTCAAATAACAATGTCCAGCACAACCTTTAAGCGTA	scaffold_2802	100	95	0	0	1	95		183059	183153	1e-46	188
scf708	VIII	101.431	<efxeg>,(ee,ef,eg,fg),fg,fg,eg,eg,ef,ef,ee,fg,fg,ee,fg,eg,eg,--,--,eg,ef,fg,eg,eg,ee,ef,fg,fg,eg,eg,ef,eg,ef,eg	TGCAGGACTTGTCGTGCACGGCGGTATCCTGCCATCCGTGCGCTGTCCAGACTCAACCCCGCTTAGCGCCCGAGATGTGATGAGTCAGGGCGATT	scaffold_708	100	95	0	0	1	95		289073	289167	1e-46	188
scf708.1	VIII	101.431	<hkxhk>,(hh,hk,kk),--,kk,hk,hk,hk,hk,hh,kk,kk,hh,--,hk,hk,hk,hk,hk,hk,kk,hk,hk,hh,hk,kk,kk,hk,hk,hk,hk,hk,hk	TGCAGGTGCTAAGTTGTTTATCGCACCGCAGGATGATAGGAGGTGGCGGTGGCTTTGGGAGCCCTTCATCCAGGAGTGGACTGACCGTGGCTGTG	scaffold_708	98.95	95	1	0	1	95		81725	81631	2e-44	180
scf708.2	VIII	101.431	<lmxll>,(ll,lm),lm,lm,ll,ll,lm,lm,ll,lm,lm,ll,lm,ll,ll,ll,ll,ll,lm,lm,ll,ll,ll,lm,lm,lm,ll,ll,lm,ll,lm,ll	TGCAGGTAACAACAACATAAGACTCTCCTTGGTTGGATGTGAATTCAAGAGGGAATGATCATAGGGTAAGAGAGTAAATGCCTCGTGTGGGGTAA	scaffold_708	100	95	0	0	1	95		35639	35733	1e-46	188
scf9316	VIII	101.431	<lmxll>,(ll,lm),lm,lm,ll,ll,lm,lm,ll,lm,lm,ll,lm,ll,ll,ll,ll,ll,lm,lm,ll,ll,ll,lm,lm,lm,ll,ll,--,ll,lm,ll	TGCAGGCGAAAGTGACAGAGCGGACTCCGTTATTATTCTCGACCATCGGCCATCATCAACCCTTCTAGCCATGACGTCTCCTTTCCCAGGTGCCA	scaffold_9316	100	95	0	0	1	95		984	1078	1e-46	188
scf141	VIII	103.164	<efxeg>,(ee,ef,eg,fg),fg,fg,eg,eg,ef,ef,ee,fg,fg,eg,fg,eg,eg,eg,--,eg,ef,fg,eg,eg,ee,ef,--,fg,eg,eg,ef,eg,ef,eg	TGCAGGCCGATCTAATCCACCCCCGGCACTGGCTGGGTCTCATGCTGAAAACTCCACAACCGCTCGGACCCTCTTTTGTGACCGGCAAGCTCACA	scaffold_141	100	95	0	0	1	95		338474	338568	1e-46	188
scf141.1	VIII	110.907	<hkxhk>,(hh,hk,kk),hh,hh,hk,hk,kk,kk,kk,hh,hh,hk,hh,hk,hk,hk,hk,hk,hk,hh,hk,hk,kk,hk,hk,hh,hk,hk,hk,hk,hk,hh	TGCAGGGCCGTCTGCTCCGACGACAGTTGCCTGTGCCAACGGAGAAGATCGATTCAAGCTGCCGCCAATTTCATCCCACAGGGCGGTCCACAGGT	scaffold_141	97.89	95	2	0	1	95		45336	45430	6e-42	172
scf3011.1	VIII	114.365	<lmxll>,(ll,lm),lm,lm,ll,ll,lm,ll,ll,lm,lm,ll,lm,ll,ll,ll,ll,ll,lm,lm,ll,ll,ll,lm,ll,lm,ll,ll,lm,ll,lm,lm	TGCAGGGGGTGCTGTCTCACTTACACAGAGCCACACAGTGCGCGTGCCCTCGTAATCCCACCATTATTTACGTGGTGCTCGTCTGCATCGGGGGT	scaffold_3011	98.95	95	1	0	1	95		6151	6245	2e-44	180
scf606	VIII	114.365	<efxeg>,(ee,ef,eg,fg),--,fg,eg,eg,ef,ee,ee,fg,--,eg,fg,eg,eg,ee,eg,eg,ef,fg,eg,eg,ee,ef,eg,fg,eg,eg,ef,eg,ef,fg	TGCAGGAGGACCTCTATTGATGTCTCACAAAGCGGTGCCAATGTTATTGAACCCCGGGTGGACCGAGTCGGCCCCCTAATTGGCGTTTGAAATCG	scaffold_606	97.89	95	2	0	1	95		103046	102952	6e-42	172
scf141.2	VIII	116.966	<nnxnp>,(nn,np),np,np,np,--,nn,nn,nn,np,np,np,np,np,np,np,np,np,nn,np,np,np,nn,nn,np,np,np,np,nn,np,nn,np	TGCAGGGACCTGTTAGCTTCTGGCTGGCATTTGAATAAATGATTAACCACATACCATACTTTAAATGTAAGCAAAATCCGGTTTGGGCTCAGCAT	scaffold_141	100	95	0	0	1	95		216375	216469	1e-46	188
scf305.1	VIII	116.966	<nnxnp>,(nn,np),np,np,np,np,nn,nn,nn,np,np,np,np,np,np,np,np,np,nn,np,np,np,nn,nn,np,np,np,np,nn,np,nn,np	TGCAGGACTGGTTGCCGCAGATATAAATGCTTTCCCGTACAATACTTTCTAAATCTTCCCGGTTTGGGTCGACCACGGGGGACACGCTGAACACT	scaffold_305	98.95	95	1	0	1	95		216153	216059	2e-44	180
scf305.2	VIII	116.966	<nnxnp>,(nn,np),np,np,np,np,nn,nn,nn,np,np,np,np,np,np,np,np,np,nn,np,np,np,nn,nn,np,np,np,np,nn,np,nn,np	TGCAGGGCCTCCCCAAGCGCCGGGTCACTTTGCGGGAAGATGCCCTCCATGAGCTCACGCGCCGTCCGAACGCCAGGCGCCAGCACGTCTGCGAG	scaffold_305	100	95	0	0	1	95		120708	120802	1e-46	188
scf4550	VIII	119.566	<hkxhk>,(hh,hk,kk),kk,kk,hk,hk,hk,hh,hh,kk,kk,hk,kk,hk,hk,hk,hk,hk,hk,kk,kk,hk,hh,hk,hh,kk,hk,hk,hk,hk,hk,kk	TGCAGGAGAGGGACTGTAGCAAAGCATGGAGCACGAGGGATGGCGTCTGCATGGGGAGGGCTTAATGCATCGTGGTTTCTAACAATAAGGGTGGT	scaffold_4550	98.95	95	1	0	1	95		23695	23601	2e-44	180
scf3011	VIII	124.868	<lmxll>,(ll,lm),lm,lm,ll,ll,lm,ll,ll,LM,lm,ll,lm,ll,ll,ll,ll,ll,lm,lm,ll,ll,ll,lm,ll,lm,ll,ll,lm,ll,lm,lm	TGCAGGAGTATTATAGGGGAGGAGGGGGCAATGTTGCTGTGCGTCATGGCCGGCTCATTTTGAACGACGTCAGGGATCTTTAACGTGCACCGCTG	scaffold_3011	98.95	95	1	0	1	95		5811	5905	2e-44	180
scf3011.2	VIII	124.868	<lmxll>,(ll,lm),lm,lm,ll,ll,lm,ll,ll,--,--,ll,lm,ll,ll,ll,ll,ll,lm,lm,ll,ll,ll,lm,ll,lm,ll,ll,--,ll,lm,lm	TGCAGGGGAGGCGGCAATTACCCAACGTCCCGTGGCCATTCCTCTGCGATCGTAAATCCCCCGCAATATTTCATCGCGGCGCTGTACCCAATCGT	scaffold_3011	98.95	95	1	0	1	95		6154	6060	2e-44	180
scf305	VIII	124.868	<lmxll>,(ll,lm),lm,lm,ll,ll,lm,ll,ll,lm,lm,ll,lm,ll,ll,ll,ll,--,lm,lm,ll,ll,ll,lm,ll,lm,ll,--,lm,ll,lm,--	TGCAGGCTTCGAGTCCGAGAATGTGTGCGTGTTTTTTTTTCTCAAAGTTATCTTGATAAGTGATTGTTTTCATTTCCTCGCATTCTTGTCGACTG	scaffold_305	100	95	0	0	1	95		216150	216244	1e-30	135
scf62	VIII	124.868	<hkxhk>,(hh,hk,kk),kk,kk,hk,hk,hk,hh,hh,hk,kk,hk,kk,hk,hk,hk,hk,hk,hk,kk,hk,hk,hh,hk,hh,kk,hk,hk,kk,hk,hk,kk	TGCAGGGACCTGTTGTTCAGTGGAGAGTGCTAATACCCCAGTTCCTCCGCCCTGCCGACACACCCGTTTATATGCTCACCGGCGTGTGTATTGCT	scaffold_62	98.95	95	1	0	1	95		332173	332267	2e-44	180
scf62.2	VIII	124.868	<hkxhk>,(hh,hk,kk),--,kk,hk,hk,hk,hh,hh,hk,kk,hk,kk,hk,hk,hk,hk,hk,hk,kk,hk,hk,hh,hk,hh,kk,HK,hk,kk,HK,hk,kk	TGCAGGAACCATAACCAAACGTTCCGTCTGCTTCGCGGTGAACGCGATAATGATCCCCTGACATAATTTGTAAGAAAACGGTTCATATTTGGTGT	scaffold_62	98.95	95	1	0	1	95		507980	507886	2e-44	180
scf62.3	VIII	124.868	<hkxhk>,(hh,hk,kk),kk,kk,hk,hk,hk,hh,hh,hk,--,hk,--,hk,hk,hk,hk,hk,hk,kk,hk,hk,hh,hk,hh,kk,hk,hk,kk,hk,hk,kk	TGCAGGCGAAACAACTGAATCCTGCTGAGGCGCACCCTCCGCGACCATTCGCCCCGGCTTGCCGGACACATGAGACACCCAGCACTCAGGTTGTG	scaffold_62	98.95	95	1	0	1	95		346298	346392	2e-44	180
scf62.4	VIII	124.868	<hkxhk>,(hh,hk,kk),hh,hh,hk,hk,hk,kk,kk,hk,hh,hk,hh,HK,hk,hk,hk,hk,hk,hh,hk,hk,kk,hk,kk,hh,hk,HK,hh,hk,hk,hh	TGCAGGCTTTCACCTTCAGCGAGCGCGATGCCGATCACACACGGTTCGAAATCGACCCTCGATGGATGGCTGCGCCATCGCCGCACACGCGTCGA	scaffold_62	98.95	95	1	0	1	95		26886	26792	2e-44	180
scf62.6	VIII	124.868	<hkxhk>,(hh,hk,kk),hh,hh,hk,hk,hk,kk,kk,hk,hh,hk,hh,hk,hk,hk,hk,hk,hk,hh,hk,hk,kk,hk,kk,hh,hk,hk,hh,hk,hk,hh	TGCAGGCCGGCGTCGCGCAGGGCGGCGATGGTCTCCGGCACCCCATCTTGCAGCCGGTCCTCGATACCCGTGGCACCTGCAGCGCCGCACCGTAC	scaffold_62	100	95	0	0	1	95		549381	549475	1e-46	188
scf62.5	VIII	128.446	<hkxhk>,(hh,hk,kk),hk,hh,hk,hk,hk,kk,kk,hk,hh,hk,hh,hk,hk,hk,hk,hk,hk,hh,hk,hk,kk,hk,HK,hh,hk,hk,hh,hk,hk,hh	TGCAGGTCAACACAGGAGGTGGTTACCATATATCATATGGCTTTACAAAGACCTTTCAATATTTATAAAGATTAGACAGGATAAGAATCAGGTTT	scaffold_62	100	95	0	0	1	95		744522	744428	1e-46	188
scf10019	VIII	136.199	<hkxhk>,(hh,hk,kk),hk,hk,hk,hk,hk,kk,kk,hk,hk,hk,hh,hk,hk,hk,hk,hk,hk,hh,hk,hh,kk,hk,kk,hh,hk,hk,hh,hk,hk,hh	TGCAGGGAGCCCCATGGCAAAGGAAAACGTGTGTGAATTTCAACGTGGGTGGTAGGGAGGCTGGCATAATGGTATCACTTGTGCGTCACAACAGG	scaffold_10019	100	95	0	0	1	95		6994	7088	1e-46	188
scf2047	VIII	136.199	<hkxhk>,(hh,hk,kk),hk,hk,hk,hk,HK,kk,kk,hk,hk,hk,hh,HK,HK,hk,hk,hk,hk,hh,hk,hh,kk,hk,kk,hh,hk,HK,hh,hk,hk,hh	TGCAGGGTCTTGTTTTGTTTGTAAAAAGTGGTATACCCCGCAGGTTATATGCGGGAAAATACGATAATTATGAACTCGGGATTGAGGTCCTGCTC	scaffold_2047	100	95	0	0	1	95		156761	156855	1e-46	188
scf831	VIII	136.199	<hkxhk>,(hh,hk,kk),hk,hk,hk,hk,hk,kk,kk,hk,hk,hk,hh,hk,hk,hk,hk,hk,hk,hh,hk,hh,kk,hk,kk,hh,hk,hk,hh,hk,hk,hh	TGCAGGCGGGTGGGGGAGCCGAAAGCGACGACCAAACTCAACACATTTGTTTAACCTGGCACGATGCCCGGCTCTTGAAGACGACAGTGCCATTT	scaffold_831	98.95	95	1	0	1	95		355138	355044	2e-44	180
scf845.1	XXII	0	<lmxll>,(ll,lm),ll,lm,lm,ll,lm,lm,lm,lm,lm,lm,ll,lm,ll,lm,lm,lm,lm,ll,ll,lm,ll,ll,lm,ll,ll,ll,lm,ll,ll,ll	TGCAGGTAGTTGATGGTGACCCAGCCAAAGGCGCCCTCCTCCTGGCCGGTGAGGATGCGAGCGCTACAGAAGAGGAACGGCGTCGCCCGCAGAGC	scaffold_845	100	92	0	0	1	92		17579	17488	6e-45	182
scf1730	XXII	2.163	<lmxll>,(ll,lm),ll,--,--,ll,lm,LM,--,lm,lm,--,ll,--,ll,lm,--,--,--,ll,ll,LM,ll,ll,lm,ll,ll,ll,--,ll,--,ll	TGCAGGGATGATGGGGTTAGTGAACCCCGAACCAGGCTTTGAACTTGCGACCTTCCAATTGCGAGCTGCTTCTCCATCGGAACACTGGTTATAGC	scaffold_1730	100	95	0	0	1	95		35523	35429	1e-46	188
scf1300	XXII	3.394	<hkxhk>,(hh,hk,kk),hk,kk,kk,--,hk,kk,kk,hk,hk,kk,hh,kk,hk,hk,kk,kk,kk,hk,hk,HK,--,hh,hk,--,hh,--,hk,hh,kk,hh	TGCAGGCACTCCCAGCCGCTCTCAGGACGCCTAAAGTGGCCCGCGGCGTCATCAAGCGGAGGGTCCTAGCCTACCTTCGCGCATGCGCAGTGGTG	scaffold_1300	100	95	0	0	1	95		30529	30623	1e-46	188
scf1000.1	XXII	5.38	<lmxll>,(ll,lm),lm,ll,ll,lm,ll,ll,ll,ll,ll,ll,lm,ll,lm,ll,ll,ll,ll,lm,lm,ll,lm,lm,ll,lm,lm,lm,ll,lm,ll,lm	TGCAGGATGCTCAATTGGGATTACACTTAGCAACATCGCCCGCTCCTGTGAAACTACTGCAGTGTGAAACAAATCGGCGTCTTCCTTCGTGATGA	scaffold_1000	100	95	0	0	1	95		7406	7312	1e-46	188
scf1073	XXII	5.38	<efxeg>,(ee,ef,eg,fg),eg,fg,fg,ee,ef,fg,fg,ef,ef,fg,ee,fg,eg,ef,fg,fg,fg,eg,eg,--,ee,ee,ef,ee,ee,ee,ef,ee,fg,eg	TGCAGGCAGACATTGCGTCGGTGGCTGGCGGGGTCAAGGGTGGGAAAAACCCGATTTTTTTTGCCCGACAAATCAGGATATTGGTTTTAATGGAA	scaffold_1073	97.92	96	1	1	1	95		72645	72550	8e-26	119
scf1073.1	XXII	5.38	<lmxll>,(ll,lm),ll,lm,lm,ll,lm,lm,lm,lm,lm,lm,ll,LM,ll,lm,lm,lm,lm,ll,ll,LM,ll,ll,lm,ll,ll,ll,lm,ll,lm,ll	TGCAGGCCCTCATTGAGGCAGAGCTGGAGCCAGCAGGCATCATCATTAATCTTAAATAATACATCACACCGTTATCGACACCCTATACATCATAG	scaffold_1073	98.95	95	1	0	1	95		77171	77265	2e-44	180
scf1300.1	XXII	5.38	<nnxnp>,(nn,np),nn,nn,nn,np,np,nn,nn,np,np,nn,np,nn,nn,np,nn,nn,nn,nn,nn,np,NP,np,np,np,np,np,np,np,nn,nn	TGCAGGATAAGCAAGAAGATTGTGAAGATGCTATGTCTGACTTCCTGTCTCCTCCTGCCAGCCCTAGCCCGAGTGCTGTATGAAACACACCCACA	scaffold_1300	100	95	0	0	1	95		28843	28937	1e-46	188
scf14861	XXII	5.38	<nnxnp>,(nn,np),np,np,np,nn,nn,np,np,nn,nn,np,nn,np,np,nn,np,np,np,np,np,nn,nn,nn,nn,nn,nn,nn,nn,nn,np,np	TGCAGGATTGTGAAGGCTACACGGGTGGGGGGGGCACCTTTGTCTGCGCGTGTCTCAGGAGGAGATCGCGAAGTCGTCTCTGGCCGAGTTCAACC	scaffold_14861	100	95	0	0	1	95		1088	1182	2e-32	141
scf1501	XXII	5.38	<lmxll>,(ll,lm),ll,lm,lm,ll,lm,lm,lm,lm,lm,lm,ll,lm,ll,lm,lm,LM,lm,ll,ll,lm,ll,ll,lm,ll,ll,ll,lm,ll,lm,ll	TGCAGGATGGGCCGGTGCGGCGAGCGCTCTGAGCGGGTGGTAGAAAAAAAACATTCACATTTAAATCAAACACGGGCCCGGGCCAAGGGCCACGC	scaffold_1501	100	95	0	0	1	95		43132	43038	2e-32	141
scf2127	XXII	5.38	<nnxnp>,(nn,np),nn,nn,nn,np,np,nn,nn,np,np,nn,np,nn,nn,np,nn,nn,nn,nn,nn,np,np,np,np,np,np,np,np,--,nn,nn	TGCAGGCATATGGTGTCTCAGTTCCAAGCCCGGCTGTGCGAGGCGAAGAAAGCCAGTAGCCCGCCGGCCTGCCCCGAGCACCAAGAGGTCAACTT	scaffold_2127	98.95	95	1	0	1	95		4003	3909	2e-44	180
scf2358	XXII	5.38	<nnxnp>,(nn,np),nn,nn,nn,np,np,nn,nn,np,np,nn,np,nn,nn,np,nn,nn,nn,nn,nn,np,np,np,np,np,np,NP,np,np,nn,nn	TGCAGGCTGGGCGGTGCCCCGGGTCCGTTCGCTACGAACCCGTTCGAAGGAGAGACGTCTTTCGAACGGGAGACGTTCGAAGGACGTCCTCCAGG	scaffold_2358	100	95	0	0	1	95		23653	23559	1e-46	188
scf2796	XXII	5.38	<lmxll>,(ll,lm),ll,lm,lm,ll,lm,lm,lm,lm,lm,lm,ll,lm,ll,lm,lm,lm,lm,ll,ll,lm,ll,ll,lm,ll,ll,ll,LM,ll,lm,ll	TGCAGGTGGGCAAGAAGGAGGACAAGCTGGGCATCCGCGCCTCCTCCACCTGCCCTGTGCACTTCGAAAACGTCAAGGTCCGCTCCTGCTTTTTG	scaffold_2796	100	95	0	0	1	95		25450	25544	1e-46	188
scf3058	XXII	5.38	<nnxnp>,(nn,np),np,np,np,nn,nn,np,np,nn,nn,np,nn,np,np,nn,np,np,np,np,np,nn,nn,nn,nn,nn,nn,nn,nn,nn,np,NP	TGCAGGGCTGCGGTGAATGTGGGTACTCCGCCTAGTTTCTTAAAATCACGGCACTATCCATATGTATATATTTTTTATGTATGTGTGTGGGTGTG	scaffold_3058	100	95	0	0	1	95		31821	31915	1e-46	188
scf3306	XXII	5.38	<nnxnp>,(nn,np),np,np,np,nn,nn,np,np,nn,nn,np,nn,np,np,nn,np,np,np,np,np,nn,nn,nn,nn,nn,nn,nn,nn,nn,np,np	TGCAGGTTGCAGGTGCCCCCGTTGTGACAGGGTCCGGTGACGCACGCGTTGATCGGCGTGTCGCAGTCTTGACCCTGCGAGGCAAACGAAGGGGG	scaffold_3306	100	95	0	0	1	95		16138	16232	1e-46	188
scf435	XXII	5.38	<lmxll>,(ll,lm),ll,lm,lm,ll,lm,lm,lm,lm,lm,lm,ll,lm,ll,lm,lm,lm,lm,ll,ll,lm,ll,ll,lm,ll,ll,ll,lm,ll,lm,ll	TGCAGGCGGTCACGTTGACTCAAAAGTCGCGAGGCCTCGTGACAAGGGACTTAAGCGTAGAGCACAATTAGTGCAGAGACTAAGCGGGTCACGAG	scaffold_435	100	95	0	0	1	95		70935	70841	1e-46	188
scf4616	XXII	5.38	<lmxll>,(ll,lm),lm,ll,ll,lm,ll,ll,ll,ll,ll,ll,lm,ll,lm,ll,ll,ll,ll,lm,lm,ll,LM,lm,ll,lm,lm,lm,ll,lm,ll,lm	TGCAGGCTTATCTCCATGTGTTACAGGAGGCTGCTCGTGGCTTGCAATGGGTGAAATCCAAACCTTTCACGGTTCCAATTGCCGGTCATTGTCTA	scaffold_4616	100	95	0	0	1	95		23868	23962	1e-46	188
scf5092	XXII	5.38	<efxeg>,(ee,ef,eg,fg),ee,ef,ef,eg,fg,ef,ef,fg,fg,ef,eg,ef,ee,fg,ef,ef,ef,ee,ee,fg,eg,eg,fg,eg,EG,eg,fg,eg,ef,ee	TGCAGGTGTTTGAGAATAAATCCACAACATTTACAATTTGAATAAAACGTTTCGCTGGTAATTACATCCAACATAATCGGGGTATTTGCCAGAAT	scaffold_5092	100	95	0	0	1	95		20288	20194	1e-46	188
scf5092.1	XXII	5.38	<hkxhk>,(hh,hk,kk),kk,hk,hk,hk,hh,hk,hk,hh,hh,hk,hk,hk,kk,hh,hk,hk,hk,kk,kk,hh,hk,hk,hh,hk,hk,hk,hh,hk,hk,kk	TGCAGGCTGAAGCAGTAACTAATTGTCGGGTGGTGGAGGGTTACGACACATTTATACTTACGCGATCTGACCAAAAAAACTTTATCATGAAACAT	scaffold_5092	100	95	0	0	1	95		20285	20379	3e-34	147
scf5982	XXII	5.38	<nnxnp>,(nn,np),np,np,np,nn,nn,np,np,nn,nn,np,nn,np,np,nn,np,np,np,np,np,nn,nn,nn,nn,nn,nn,nn,nn,nn,np,np	TGCAGGTAAGGATAATACGTTTTTCTTAATTATAACTTATATTATGACATGTGTTCTATCATTGAATTAGATGGAAATCTCAAAGAGCTTACTGA	scaffold_5982	100	95	0	0	1	95		8205	8111	1e-46	188
scf845	XXII	5.38	<hkxhk>,(hh,hk,kk),hk,--,hh,kk,HK,hh,hh,hk,hk,hh,kk,hh,hk,hk,hh,hh,hh,hk,hk,hk,kk,kk,hk,kk,kk,kk,hk,kk,hh,hk	TGCAGGGACCTGTTACCTCTGGGCTTTGCCTGATAGGATGGGGATGGTTTAGTTTTATTTGTATATTTGGGTGATTTGTTTACTTGTCTTGTACT	scaffold_845	100	95	0	0	1	95		43359	43453	1e-46	188
scf1730.1	XXII	7.351	<lmxll>,(ll,lm),--,ll,ll,lm,ll,ll,ll,ll,ll,ll,lm,ll,--,ll,ll,ll,ll,--,--,ll,lm,lm,ll,lm,lm,lm,ll,lm,ll,--	TGCAGGTTCTATAGCATCAGTCGTTGTTCTATGGAACGACGAGTCCCCGCCATAGGAATGTGGAATTTCCACGACTGGCTCAACCGATTTGAACA	scaffold_1730	100	95	0	0	1	95		35520	35614	1e-46	188
scf33	XXII	8.8	<efxeg>,(ee,ef,eg,fg),fg,eg,--,ef,ee,eg,eg,ee,--,eg,ef,eg,fg,ee,eg,eg,eg,eg,fg,ee,ef,ef,ee,ef,ef,ef,ee,fg,eg,fg	TGCAGGCACCGCTGCCCGCACTCGGGTCTCTAATACTGACGATGACTTAAACCGTTCGTGGTCCACCAACTCCACCTCGGAAGTCATCCGATGTC	scaffold_33	96.84	95	3	0	1	95		168706	168612	1e-39	165
scf537	XXII	8.8	<lmxll>,(ll,lm),lm,ll,ll,LM,ll,ll,ll,ll,ll,ll,lm,ll,lm,ll,ll,ll,ll,ll,lm,ll,lm,lm,ll,lm,lm,lm,ll,lm,ll,lm	TGCAGGTATCGATTTGTCTGGGTTGAAGGATGTTGTGATTCACACCACCACCTTATCCCCAGGACCAATTCAACCTTTTGAAAAAACTTTCAATT	scaffold_537	98.95	95	1	0	1	95		51293	51199	2e-44	180
scf911	XXII	8.8	<lmxll>,(ll,lm),ll,lm,lm,ll,lm,lm,lm,lm,lm,lm,ll,lm,ll,LM,lm,lm,lm,lm,ll,lm,ll,ll,lm,ll,ll,ll,lm,ll,lm,ll	TGCAGGATGCGGTCAAGCTGATCAAAACGCCGTCAACTCGCCGCGTTCTAAAAACAAGCAGGCCTTCTCCGCTCAAAATGAAAAAGGCACACATG	scaffold_911	98.95	95	1	0	1	95		35905	35811	2e-44	180
scf911.1	XXII	8.8	<nnxnp>,(nn,np),NP,np,NP,nn,nn,np,np,nn,nn,np,nn,np,np,nn,np,np,np,np,np,nn,nn,nn,nn,nn,nn,nn,nn,np,np,np	TGCAGGGCAAATCACAATAACCATTCAGTCCTACATAATGGCAATCATTTGCATGAAGAGGACAGGCTTGTAAAATATAACTAATGGCATGCAAA	scaffold_911	100	95	0	0	1	95		73013	73107	1e-46	188
scf199	XXII	15.446	<lmxll>,(ll,lm),lm,ll,ll,lm,ll,ll,ll,ll,ll,ll,lm,ll,lm,ll,ll,ll,ll,ll,lm,ll,lm,lm,ll,LM,lm,--,LM,--,ll,lm	TGCAGGCGTTGCACGGACGCTGAGGACGGCTGGTCTCTTCCACCGCTCCAGAAGAACTCTGATCCAATTTGCCCTCCTTCCCCCCTCATGTTCCC	scaffold_199	97.89	95	2	0	1	95		204690	204784	6e-42	172
scf6756	XXII	15.446	<efxeg>,(ee,ef,eg,fg),ef,eg,eg,ef,ee,eg,eg,ee,eg,eg,ef,eg,fg,--,eg,eg,eg,eg,fg,ee,ef,ef,ee,ef,ef,ef,ef,fg,eg,fg	TGCAGGGGTTGTTGAGAGAGCCGAGCCACCCTCCGATTAAAGAATCAGCCGCCCACACCTTCTTTTAATAATGGAAGCTTAAACTACACTTGAAG	scaffold_6756	100	95	0	0	1	95		7178	7084	1e-46	188
scf321.1	XXII	16.597	<lmxll>,(ll,lm),ll,lm,lm,ll,lm,lm,lm,lm,lm,lm,ll,lm,ll,lm,lm,lm,lm,lm,ll,lm,ll,ll,lm,ll,ll,ll,ll,ll,lm,ll	TGCAGGAATCATCTAGGGTGCAATCATCAGAATCGAATACAATTCCCGCAGGATTCATTCGGCTCTAATCGTGATCATATATCACTCCTCATGAC	scaffold_321	100	95	0	0	1	95		56078	56172	1e-46	188
scf12096	XXII	17.749	<nnxnp>,(nn,np),nn,nn,nn,np,np,nn,nn,np,nn,nn,np,nn,nn,nn,nn,nn,--,nn,nn,np,np,np,np,np,np,np,np,nn,nn,nn	TGCAGGCGTTGGTGACTGAGCTGAGATCGTCAACTCCCTTCACTTAGAAGCCACCAGAGATGCAAGAAAAATAAATACACTTTGATCGCAAGCGG	scaffold_12096	98.95	95	1	0	1	95		3936	4030	2e-44	180
scf1472	XXII	17.749	<efxeg>,(ee,ef,eg,fg),ee,ef,ef,--,fg,ef,ef,fg,ef,ef,eg,ef,ee,ef,ef,ef,ef,ef,ee,fg,eg,eg,fg,eg,eg,eg,eg,ee,ef,ee	TGCAGGATGGCATCGTCCACTGCCAGGGTGACGGGCAAAGCAGAGGAGGAGGAGGTTAGAGTTAGGATAACAAATCAGCCCCAAACTAAGCAGAA	scaffold_1472	100	95	0	0	1	95		4777	4871	1e-46	188
scf2960	XXII	17.749	<hkxhk>,(hh,hk,kk),hk,kk,kk,hh,hk,kk,kk,hk,kk,kk,hh,kk,hk,kk,kk,kk,kk,kk,hk,HK,hh,hh,hk,hh,hh,hh,hh,hk,kk,hk	TGCAGGTGGGTAGTGAACTCTCTGGCCCGGTTCAACAAAATTAACTCGAAACTTAAACGTGCATATATCCACAGCGGGACTAAGGCCTTCACAGC	scaffold_2960	97.89	95	2	0	1	95		18922	18828	6e-42	172
scf5343.1	XXII	17.749	<nnxnp>,(nn,np),np,np,np,nn,nn,np,np,nn,np,np,nn,np,np,np,np,np,np,np,np,nn,nn,nn,nn,nn,nn,nn,nn,np,np,np	TGCAGGGATAATCACGCTCGGCTAAGTTGGCAAAGATGCTGGTGGCTTGGGGATAAGGGGGGCGGGGGAGCAAGGTGGACTGTACATTGTGCTTT	scaffold_5343	100	95	0	0	1	95		27963	27869	3e-25	117
scf5720	XXII	17.749	<hkxhk>,(hh,hk,kk),HK,hh,hh,kk,hk,hh,hh,hk,hh,hh,kk,hh,hk,hh,hh,hh,hh,hh,hk,hk,kk,kk,hk,kk,kk,kk,kk,hk,hh,hk	TGCAGGGCGTGGGTAGACCCTCATCCAGCAGTGGATAGGCAAATGGCTGTACAGTAACATTAAGCGAATGTAGAAATAATGCAGCTAGTCTCGTG	scaffold_5720	100	95	0	0	1	95		9786	9880	1e-46	188
scf189	XXII	19.473	<lmxll>,(ll,lm),ll,lm,lm,ll,lm,lm,lm,lm,lm,lm,ll,lm,ll,lm,lm,lm,lm,lm,ll,lm,ll,ll,lm,ll,ll,ll,ll,ll,lm,ll	TGCAGGCCACCGAGGTGGACAGGGCCCGCGCCGTGGCGGAGCGGGCGCTCAAGACCATCTCCTTCAGGTGAGCGGCTGACCGGGATCGTGCGCGG	scaffold_189	98.95	95	1	0	1	95		30831	30737	2e-44	180
scf64.4	XXII	19.473	<nnxnp>,(nn,np),np,nn,np,nn,nn,np,np,nn,np,np,nn,np,np,np,np,np,np,np,np,nn,nn,nn,nn,nn,nn,nn,nn,np,np,np	TGCAGGTACTCGATTACCCCAATAGGGTACTTATCGGGGACAGCTCATTGCGAGCGAGCCGCACATACTTTGATTGAGCTGCCCTGTCTATTAAA	scaffold_64	98.95	95	1	0	1	95		26933	26839	2e-44	180
scf1614	XXII	21.198	<hkxhk>,(hh,hk,kk),hk,kk,kk,hh,hk,kk,kk,hk,kk,kk,hh,kk,hk,kk,kk,kk,kk,kk,--,hk,hh,hh,hk,hh,hh,hh,hh,hk,kk,hk	TGCAGGGACCTGTTAAACCCTGACAGCACGGTTGATTTGCACGTTCATTTTCAACCACGTCGTTGGTGCGGCTGTTGGCCAGAGTCGCCGGCGAA	scaffold_1614	97.89	95	2	0	1	95		41624	41718	6e-42	172
scf2960.1	XXII	21.198	<hkxhk>,(hh,hk,kk),hk,hh,hh,kk,hk,hh,hh,hk,hh,hh,kk,hh,hk,hh,hh,hh,hh,hh,hk,hk,kk,kk,hk,kk,kk,kk,kk,hk,hh,hk	TGCAGGATTAACACGTGGCACTATTATTACTATACCTACATCGCGAGGAGCGGTGGCGCAGCGGTTAGCGAACCCGGCGAACAGAGTTCGATTCT	scaffold_2960	98.95	95	1	0	1	95		27047	27141	2e-44	180
scf321	XXII	21.198	<lmxll>,(ll,lm),ll,lm,lm,ll,lm,lm,lm,lm,lm,lm,ll,lm,ll,lm,lm,lm,lm,lm,ll,lm,ll,ll,lm,ll,ll,ll,ll,ll,lm,ll	TGCAGGCAGGCATTGTAATTCTGCAAGGGATGATTCCCAGGGATTCCTGCCGTGGAAGGGTCGATGTGTCCTGGCTGTGCCGTTGCCTTGAGTCG	scaffold_321	100	95	0	0	1	95		56081	55987	1e-46	188
scf321.2	XXII	21.198	<lmxll>,(ll,lm),lm,ll,ll,lm,ll,ll,ll,ll,ll,ll,lm,ll,lm,ll,ll,ll,ll,ll,lm,ll,lm,lm,ll,lm,lm,lm,lm,lm,ll,lm	TGCAGGCAGTTGGCTGCATTTTATTGCTGCCTGGGTGTGTGAATTGTGCCGGCTGAAGTTGCCGAATGCGTAGGCATATCCTTGCCCAGTGATGC	scaffold_321	98.95	95	1	0	1	95		7704	7610	2e-44	180
scf5343	XXII	21.198	<hkxhk>,(hh,hk,kk),hk,hh,hh,kk,hk,hh,hh,hk,hh,hh,kk,hh,hk,hh,hh,hh,hh,hh,hk,hk,kk,kk,hk,kk,kk,kk,kk,hk,hh,hk	TGCAGGGAAATCTGCTGCAGCGTTTTTATATCTAAATTCATTATGACATACATCATTGCAGATATTTAATAAGCCCGGCCTCTCTGTGTTCCGGA	scaffold_5343	100	95	0	0	1	95		27960	28054	1e-46	188
scf64.1	XXII	21.198	<lmxll>,(ll,lm),ll,lm,lm,ll,lm,lm,lm,lm,lm,lm,ll,lm,ll,lm,lm,lm,lm,LM,ll,lm,ll,ll,lm,ll,ll,ll,ll,ll,lm,ll	TGCAGGAAACATGCCATTGGCAAACTTTGTTTTTGCATTCCCGAGAACTTGGTAAAGACAGTACACTTAGAAAACAGTATTATCTAGGTTTCCAT	scaffold_64	100	95	0	0	1	95		595741	595835	1e-46	188
scf64.2	XXII	21.198	<nnxnp>,(nn,np),np,np,np,nn,nn,np,np,nn,np,np,nn,np,np,np,np,np,np,np,np,nn,nn,nn,nn,nn,nn,nn,nn,np,np,np	TGCAGGTAATTCTCCACACATTATTGACGCCGACATTGGCACGCAGGTGACCTTTGCTCGTGAAACACGAGTTAGGCGACGTCATTTCAGGTTTT	scaffold_64	98.95	95	1	0	1	95		26930	27024	2e-44	180
scf64.3	XXII	21.198	<nnxnp>,(nn,np),nn,nn,nn,np,np,nn,nn,np,nn,nn,np,nn,--,nn,nn,nn,nn,nn,nn,np,np,np,np,np,np,np,np,nn,nn,nn	TGCAGGTGGAACGGCAACGGATTCTACTCGCTGCAGTCCTTGCACCACTGGTACCGGGACACGGACGCCGAGTTTGTGGAGATCGCCGGCAAACC	scaffold_64	100	95	0	0	1	95		299534	299440	1e-46	188
scf64	XXII	22.932	<efxeg>,(ee,ef,eg,fg),ee,ef,ef,eg,fg,ef,ef,fg,ef,ef,--,ef,ee,ef,ef,ef,ef,ef,ee,fg,eg,eg,fg,eg,eg,eg,eg,ee,fg,ee	TGCAGGATAGTCATGCGTTGGGTGGTACGTGAATGGAAATTGGAATAACATTGAGAGAAACACATGGATTTGAGAACACATGCAAGTTACGTACG	scaffold_64	96.81	94	3	0	1	94		995614	995707	6e-39	163
scf2405.1	XXII	27.679	<lmxll>,(ll,lm),lm,ll,ll,lm,ll,ll,ll,LM,ll,lm,lm,ll,lm,ll,ll,ll,ll,ll,lm,ll,lm,lm,ll,lm,LM,lm,lm,lm,ll,lm	TGCAGGTGATCCAGTTTCTTCCTACATGTAAAGGGTCATTAATTGGCCGATAAATCCTTAATAGAAAGAGGACAGCAGAGCTTGGGCAATTGTTG	scaffold_2405	100	95	0	0	1	95		26031	25937	1e-46	188
scf12.1	XXII	29.968	<efxeg>,(ee,ef,eg,fg),--,fg,fg,ee,ef,fg,fg,ef,fg,eg,ee,fg,eg,fg,fg,fg,fg,ef,eg,ef,ee,ee,ef,ee,ee,ee,ee,eg,ef,eg	TGCAGGTGAATACATTTGAAATGGAAAAAAGGCGACCATATCGACACGTAAATATATTTGTGATATTCTTAGCTCTTTCGGTAAAGTCACGTTGA	scaffold_12	100	95	0	0	1	95		610641	610735	1e-46	188
scf12.2	XXII	29.968	<hkxhk>,(hh,hk,kk),hk,hh,hh,kk,hk,hh,hh,hk,hh,hk,kk,hh,hk,hh,hh,hh,hh,hk,hk,hk,kk,kk,hk,kk,kk,kk,kk,hk,hk,hk	TGCAGGAATCTCCCAACTCTATTTGTCACAGACATTATCCGTGGCACGCAAACTACTGCACCACTAACTTTCCCCTTTACCCACATGGCCTCGTG	scaffold_12	100	93	0	0	1	93		641596	641504	2e-45	184
scf12.3	XXII	29.968	<hkxhk>,(hh,hk,kk),hk,kk,kk,hh,hk,kk,kk,hk,kk,hk,hh,kk,hk,kk,kk,kk,kk,hk,HK,hk,hh,hh,hk,hh,hh,hh,hh,hk,HK,hk	TGCAGGGATTTTGATTCTTCTATTGGAGATTCCCATGTAAAATGTATGCACATACTGCACATGATCAAGCATCTAAGTGTGAATACATAGATGAG	scaffold_12	98.95	95	1	0	1	95		641638	641732	2e-44	180
scf77	XXII	29.968	<lmxll>,(ll,lm),lm,ll,ll,lm,ll,ll,ll,ll,ll,lm,lm,--,lm,ll,ll,ll,ll,ll,lm,ll,LM,lm,ll,lm,lm,lm,lm,lm,--,lm	TGCAGGGTTATTACACGTTGTACATATTCTACAGTTGCAGAATCAAACTATGGTGGAGTATGTTACATTTTGCGATGCTTCAACAGTAAAGCTTT	scaffold_77	100	95	0	0	1	95		377372	377466	1e-46	188
scf12	XXII	30.944	<efxeg>,(ee,ef,eg,fg),eg,--,--,ee,ef,--,--,ef,--,eg,ee,--,eg,--,--,--,--,ef,eg,ef,ee,ee,ef,ee,ee,ee,ee,eg,ef,eg	TGCAGGCTACATGACTATTGGAGATCTTATTTTCACTTTCCCAATGTCAATGCAACATTGTAGGCCCATTGCCAAGGCTGTGGATATATTTACCG	scaffold_12	96.84	95	3	0	1	95		610644	610550	1e-39	165
scf12.4	XXII	32.621	<lmxll>,(ll,lm),--,lm,lm,ll,lm,lm,lm,lm,lm,ll,ll,lm,ll,lm,ll,lm,lm,lm,ll,LM,ll,ll,lm,ll,ll,ll,ll,ll,lm,ll	TGCAGGTTGTGTGTGGTGGGGTAAAGTGTGGGTACTCCAATCTCTTCCAAAATGTCTGGCTAGCTTGAAGAAGTAGGCCGAACACCTTGAAAAGG	scaffold_12	100	95	0	0	1	95		868975	869069	1e-46	188
scf3267	XXII	34.199	<nnxnp>,(nn,np),nn,nn,nn,--,np,--,nn,np,nn,nn,np,nn,nn,nn,nn,nn,nn,np,nn,--,--,--,np,--,np,--,--,nn,np,nn	TGCAGGAAAATAGCTTCGTAAATTTTACAATTAGTTTTTTTTCTCCCTCAACAAAACTCTAATTAGCATATTGATATAAAGCAATGCCGATAATT	scaffold_3267	98.95	95	0	1	1	95		21173	21080	2e-29	131
46943	XXII	35.134	<efxeg>,(ee,ef,eg,fg),ee,ef,ef,eg,--,fg,ef,fg,ef,ee,eg,ef,ee,ef,ef,ef,ef,fg,ee,fg,eg,eg,--,eg,eg,eg,eg,ee,fg,ee	TGCAGGGAAACAAGCAGTTACCAGGTGAGGCAACCCTGATTAACAACCTAAGCCGGGACCTGATGGACTTTCACGTCGTCTAGCTTTACTTCATT
scf2405	XXII	36.859	<efxeg>,(ee,ef,eg,fg),eg,fg,fg,ee,ef,ef,fg,ef,fg,eg,ee,fg,eg,fg,fg,fg,fg,ef,eg,ef,ee,ee,ef,ee,ef,ee,ee,eg,ef,eg	TGCAGGAAACCCACGCGTACGAGGGGGAAACACTCTATCCCATAGAGACGGAAGAGGTAGTGTCTACATTTTTTCAGTACCGCATTACGCCAAGC	scaffold_2405	98.95	95	1	0	1	95		26028	26122	2e-44	180
scf77.1	XXII	37.721	<nnxnp>,(nn,np),nn,nn,nn,np,np,np,nn,np,nn,nn,np,nn,nn,nn,nn,nn,nn,np,nn,np,np,np,np,np,np,np,np,nn,np,nn	TGCAGGCAGACGGTTGCACCGCACCGATTGAGACCATGGCAACGTGGCAGGAAAGAAGTGCATCAGACCTGTTGGACATCTCCAGGCAACAGTGA	scaffold_77	97.89	95	2	0	1	95		80609	80515	6e-42	172
scf1504	XXII	38.584	<hkxhk>,(hh,hk,kk),hk,kk,kk,hh,hk,hh,kk,hk,kk,hk,hh,kk,hk,kk,kk,kk,kk,hk,hk,hk,hh,hh,hk,hh,hk,hh,hh,hk,hk,hk	TGCAGGGATGTGGCCGCGTAAAGCGCGCGCCCCCACGTGTTGCCGATTTAGCGTGGAGTTTCAGCCGCTGTTCGATCCTGTGTTCGTGCACCGTA	scaffold_1504	98.95	95	1	0	1	95		24823	24729	2e-44	180
scf1504.4	XXII	38.584	<lmxll>,(ll,lm),lm,ll,ll,lm,ll,lm,ll,ll,ll,lm,lm,ll,lm,ll,ll,ll,ll,ll,lm,ll,lm,lm,ll,lm,ll,lm,lm,lm,ll,lm	TGCAGGATATTGCAAATCAGTGAGCACTTAAACTCCACTTTACAGATCACCCTTTTCAGAAGCTGTTCTGAACTGCCTCTAACGCAGTGGGCCTT	scaffold_1504	100	95	0	0	1	95		9770	9676	1e-46	188
scf432	XXII	40.309	<nnxnp>,(nn,np),np,np,np,nn,nn,--,np,nn,np,np,nn,np,np,np,np,np,np,nn,np,nn,nn,nn,nn,nn,nn,nn,nn,np,nn,np	TGCAGGGATATGTCTGTACGCTGCACAAGCAAGACAGGCCTTATTGATATTCTGCTCTGGGTCACATGGCAACTGCTGTTGTGCTCGTTAATTCT	scaffold_432	100	95	0	0	1	95		9818	9724	1e-46	188
scf506	XXII	40.309	<lmxll>,(ll,lm),LM,lm,lm,ll,lm,ll,lm,lm,lm,ll,ll,lm,ll,lm,lm,lm,lm,lm,ll,lm,ll,ll,lm,ll,lm,ll,ll,ll,lm,ll	TGCAGGTTAAACCCAGGATGGATCGTAGGCAGGCCAGCCTAAATGTTTCTGACCGGCGAAGATGCTGCACGCACACAACGCTCGCACGCTGTACA	scaffold_506	96.88	96	2	1	1	95		93009	92914	9e-38	159
scf127	XXII	42.034	<efxeg>,(ee,ef,eg,fg),eg,fg,fg,ee,ef,ee,fg,ef,fg,eg,ee,fg,eg,fg,fg,fg,fg,ef,eg,ef,ee,ee,ef,ee,ef,ee,ee,eg,ef,eg	TGCAGGGACCTGTTTAGAATTGGATTCGTGCCGGTTTTGCAAAGTTCTTCGTGAGGCGTTTGTGAATGCCACTGCATATGTTTTGCCAAGCGTGA	scaffold_127	98.95	95	1	0	1	95		388989	388895	2e-44	180
scf127.1	XXII	42.034	<hkxhk>,(hh,hk,kk),hk,hh,hh,kk,hk,kk,hh,hk,hh,hk,kk,hh,hk,hh,hh,hh,hh,hk,hk,hk,kk,kk,hk,kk,hk,kk,kk,hk,hk,hk	TGCAGGGCCTGCTCCCGGCGCTTGACTGCCACGTTCAGGCTCGGGAACACGCTGCTGAACCTGACCAAAGAGTCACAGGGAGGACCAGAAAGAGC	scaffold_127	100	95	0	0	1	95		181080	180986	1e-46	188
scf127.2	XXII	42.034	<hkxhk>,(hh,hk,kk),hk,kk,kk,hh,hk,hh,kk,hk,kk,hk,hh,kk,hk,kk,kk,kk,kk,hk,HK,hk,hh,hh,hk,hh,hk,hh,hh,hk,hk,hk	TGCAGGGACCTGTTTCAGATATCACTTGACACGTTGATGAGAGGGACGCCACAGTGGCATGATGTTAACTCCCTCACCCGGTATTTAGGAAGTCA	scaffold_127	98.94	94	1	0	1	94		182988	183081	1e-43	178
scf1504.1	XXII	42.034	<hkxhk>,(hh,hk,kk),HK,hh,hh,kk,hk,kk,hh,hk,hh,hk,kk,hh,hk,hh,hh,hh,hh,hk,hk,hk,kk,kk,hk,kk,hk,kk,kk,hk,hk,hk	TGCAGGAATCATCCATCCAGAGAGAATGATTCCTATAGAAATCTCCCAGTTCTACCTTATACAAAAAATAAATACACTTTCTGCATATAACATTG	scaffold_1504	100	95	0	0	1	95		53399	53493	1e-46	188
scf1504.2	XXII	42.034	<hkxhk>,(hh,hk,kk),hk,kk,kk,hh,hk,hh,kk,hk,kk,hk,hh,kk,hk,kk,kk,kk,kk,hk,hk,hk,hh,hh,hk,hh,hk,hh,hh,hk,hk,hk	TGCAGGCTGTGCTGTCCTCTGTAGATTAACTTGTTATCGGCCAATTGACGAGTGTCGTGTTTACATGTGGGAGGAAACCAGAGCACCCGGAGAAA	scaffold_1504	98.95	95	1	0	1	95		27779	27685	2e-44	180
scf1504.3	XXII	42.034	<hkxhk>,(hh,hk,kk),hk,kk,kk,hh,hk,hh,kk,HK,kk,hk,hh,kk,HK,kk,kk,kk,kk,HK,hk,hk,hh,hh,HK,hh,hk,hh,hh,--,hk,hk	TGCAGGGGATATACATTTCTGCTTATCTACAGTTCCTCACCCCTCGTGAGTCGTCAGTCTCTGTCCAAGAGTGAGAAAATAGCGTGCGTGTTACA	scaffold_1504	100	95	0	0	1	95		27776	27870	1e-46	188
scf2091.1	XXII	42.034	<lmxll>,(ll,lm),--,lm,lm,ll,lm,ll,lm,lm,lm,ll,ll,lm,ll,lm,lm,lm,lm,lm,ll,LM,ll,ll,lm,ll,LM,ll,ll,ll,--,ll	TGCAGGTTCAAATACCAATTAGTGGTCGACTAATCCCCTCATCCTTCTGAAGTCAATGAAATGAGTACAACTTTGTGTGAAACCAAGAGTTGTCA	scaffold_2091	96.84	95	3	0	1	95		27646	27552	1e-39	165
scf2091.2	XXII	42.034	<lmxll>,(ll,lm),ll,lm,lm,ll,lm,ll,lm,lm,lm,ll,ll,lm,ll,lm,lm,lm,lm,lm,ll,lm,ll,ll,lm,ll,lm,ll,ll,--,lm,ll	TGCAGGCTTCTGTCTCGGTTGTTGCATGATACTAATAATGCGTGGTTATCGCCTTTTGAACTTTCAGATTACAACCCACCGTCGCCTCCATCGGG	scaffold_2091	100	95	0	0	1	95		27643	27737	1e-46	188
scf1387.1	XXII	43.29	<hkxhk>,(hh,hk,kk),hk,kk,kk,hh,hk,hh,kk,hk,kk,hk,hh,kk,hk,kk,kk,kk,kk,hk,hk,--,hh,hh,HK,hh,hk,hh,hh,hk,hk,hk	TGCAGGAACTTTGTTTGTGCACAGGGCGCTTGGCTTAGCGAGGTGGCGGTACATGCCAGGTTGGCCAAATTCGCCAGGACATTGTGGTCCAGATG	scaffold_1387	100	95	0	0	1	95		2977	2883	1e-46	188
35822	XXII	43.735	<efxeg>,(ee,ef,eg,fg),--,fg,fg,ee,ef,ee,fg,ef,fg,eg,ee,fg,eg,fg,fg,fg,fg,ef,eg,ee,ee,ee,ef,ee,ef,ee,ee,eg,ef,eg	TGCAGGTACATGAGCTCCTCATGCATCTGTTCTCGTGCCTGGACATGAGCACGGACACAAAAACCGCTGTGGGCCCCATCGTCACAAACTCCACA
scf1387	XXII	43.735	<efxeg>,(ee,ef,eg,fg),eg,fg,fg,ee,ef,ee,fg,ef,fg,eg,ee,fg,eg,fg,fg,fg,--,ef,eg,ee,ee,ee,ef,ee,ef,ee,ee,eg,ef,eg	TGCAGGGCTGGGACGCCGAGTCGTTGTTTTGGGTAACCCAAGATTTGGGAGACCCTTGAATGAATGTAGTTTGTTTTGAGTGGGGTAAGTCTCTC	scaffold_1387	98.95	95	1	0	1	95		56737	56831	2e-44	180
scf1824	XXII	43.735	<lmxll>,(ll,lm),--,ll,ll,lm,--,lm,ll,ll,ll,--,lm,ll,--,ll,ll,ll,ll,ll,--,lm,lm,lm,ll,lm,ll,lm,lm,--,ll,--	TGCAGGGCCTGCATCTTTGGCAGGAGGGACTGTTGTCTTGTTTCACCGACTTTTGAGATGTTGCCACTTCCTTTATTTTATGAAACTGTTGTTTT	scaffold_1824	100	95	0	0	1	95		5469	5563	1e-46	188
scf4062	XXII	43.735	<efxeg>,(ee,ef,eg,fg),eg,fg,fg,ee,ef,ee,fg,ef,fg,eg,ee,fg,--,fg,fg,fg,fg,ef,eg,ee,ee,ee,ef,ee,ef,ee,ee,eg,ef,eg	TGCAGGATGCTTCCCTTCAATGAACAGCACTGGAAACATCAGTGTGAAGGCTTCGTCATTACCTGCTGTCTCCTCCTGGCAAGGACACAAACCCC	scaffold_4062	98.95	95	1	0	1	95		7596	7690	2e-44	180
scf4062.1	XXII	43.735	<hkxhk>,(hh,hk,kk),hk,kk,kk,hh,hk,hh,kk,hk,kk,hk,hh,kk,hk,--,kk,kk,kk,hk,hk,hh,hh,hh,hk,hh,hk,hh,hh,hk,hk,hk	TGCAGGTACTTCATTGCCAAGCAGCTGGTCAGTGTCTGTTTGTTGATGGCTCACAACTGTTCGTGATCTCCCGAGTCCATGTCCAAGGTGCTGGA	scaffold_4062	97.89	95	2	0	1	95		7599	7505	6e-42	172
scf432.1	XXII	43.735	<nnxnp>,(nn,np),np,np,np,nn,nn,nn,np,nn,np,np,nn,np,np,np,np,NP,np,nn,np,nn,nn,nn,nn,nn,nn,nn,nn,np,nn,np	TGCAGGGACAAAGTTTAACTCAACCCCAAGAGGGAACATGGGAACGTGACACTGGACGAACTACTGTCCAGCTTAGTCATTCTCTGCTCGCGTGC	scaffold_432	100	95	0	0	1	95		9815	9909	1e-46	188
scf528.1	XXII	52.257	<lmxll>,(ll,lm),ll,lm,lm,ll,lm,ll,lm,lm,lm,ll,lm,lm,ll,ll,lm,lm,lm,lm,ll,ll,ll,ll,lm,ll,lm,ll,--,--,lm,lm	TGCAGGCAGGTTGTCACACGAGCTCCTTGCATGACCCACCAACCCTAGCTGCGGATCTCTGCGATTCTTACGGGTGCTGCCACACCCGACAAAAT	scaffold_528	100	95	0	0	1	95		132090	131996	1e-46	188
scf582.1	XXII	57.704	<lmxll>,(ll,lm),ll,lm,lm,ll,lm,ll,lm,LM,ll,ll,lm,lm,ll,ll,lm,lm,lm,lm,ll,ll,ll,ll,lm,ll,lm,ll,ll,LM,lm,ll	TGCAGGGCAGCAAAGATGTGTGTGTCTGTAGGTTGGTGGAACAGAAGATGCTCCTGTGGTCCATCTCTATGGAATTAAACCGATCATTTTGCCAA	scaffold_582	97.8	91	2	0	1	91		37888	37978	1e-39	165
scf582	XXII	62.133	<efxeg>,(ee,ef,eg,fg),ee,ef,ef,eg,fg,eg,ef,fg,ee,ee,ef,ef,ee,ee,ef,--,ef,fg,ee,eg,eg,eg,fg,eg,fg,eg,eg,ee,fg,ef	TGCAGGTGGGAATCTCACACAAGAAGCTCCATCGCCACGTTATTCACCCCCTGCCTCCAAGCCCTTCGCAACTGAAACCATGTGCTCCTTTTCAC	scaffold_582	98.95	95	1	0	1	95		37891	37797	2e-44	180
scf1495.1	XXII	62.167	<hkxhk>,(hh,hk,kk),kk,hk,hk,hk,hh,hk,hk,hh,kk,kk,hk,hk,kk,kk,hk,hh,hk,hh,kk,HK,hk,hk,hh,hk,hh,hk,hk,kk,hh,hk	TGCAGGTGGAGGGGGACGTCGCGGCCGTGGCCCCAACGTGGAGTCGCAAACGGGGAGAGGTGCCGCGGCAGTCACGGGACTGGAAGCCGCGCGAG	scaffold_1495	100	95	0	0	1	95		147241	147147	1e-46	188
scf1495.2	XXII	62.167	<nnxnp>,(nn,np),nn,nn,nn,np,--,np,nn,--,nn,nn,nn,nn,nn,nn,nn,--,nn,--,nn,np,np,np,--,np,--,np,np,nn,--,nn	TGCAGGTCCACGGCAGGCTGAATCGCGACGTTCTGTGGTGACCACCCAACCGATTCGCCATCGCGGCCGGGGTCTCCCGTCCATGCTGCCATCTG	scaffold_1495	98.95	95	1	0	1	95		147238	147332	2e-44	180
scf528	XXII	62.167	<hkxhk>,(hh,hk,kk),hk,hh,hh,--,hk,kk,hh,hk,hk,hk,hh,hh,hk,hk,--,hk,hh,hk,hk,kk,kk,kk,hk,kk,hk,kk,kk,hk,hk,hh	TGCAGGTGATCGCGTGTTCGTATTCTTCTTCTTTCCTATGGCATGTAAGCAACATTTTGTATCGATGTCATAGTTGAATATTAAGGTCCTTCGAC	scaffold_528	100	95	0	0	1	95		185107	185201	1e-46	188
scf528.2	XXII	62.167	<nnxnp>,(nn,np),np,np,np,nn,nn,nn,np,nn,np,np,np,np,np,np,np,nn,np,nn,NP,nn,nn,nn,--,nn,nn,nn,nn,np,--,np	TGCAGGGACCTGTTCTCAGTCAACGCTCGTCATTTCGGGGGTAGCAACTTCAGTTTCTTCCGCAGGGAGATACTTATTTTGCCCACGGCGGAAAA	scaffold_528	100	95	0	0	1	95		166985	166891	1e-46	188
scf2667	XXII	67.488	<efxeg>,(ee,ef,eg,fg),eg,--,fg,ee,ef,ee,ef,ee,eg,eg,--,fg,eg,eg,fg,ef,fg,ef,eg,ee,ee,ee,ef,ef,ef,ee,ee,eg,ef,fg	TGCAGGATAAATCACAACACATTGTTATACCGCTTACGGTCAGGAGAACGTGAACTTGTGTTTGCTTTTTCTTTGCAGAAGAGGCTTAAAAGTTA	scaffold_2667	100	95	0	0	1	95		27763	27857	1e-46	188
scf9372.1	XXII	67.488	<nnxnp>,(nn,np),np,np,np,nn,nn,nn,nn,nn,np,np,np,np,np,np,np,nn,np,nn,np,nn,nn,nn,nn,nn,nn,nn,nn,np,nn,np	TGCAGGCCGCCCAGCAGATGGACAGCAACTGGACCCTCATGAAAGTCGGTGCGTTTCCGCTCGCTCCTTTTTCCTCGCCACGACAACTCGGGGTG	scaffold_9372	100	95	0	0	1	95		1489	1395	1e-46	188
scf9372	XXII	71.085	<lmxll>,(ll,lm),ll,lm,lm,ll,lm,ll,lm,lm,ll,ll,lm,lm,ll,ll,lm,lm,lm,lm,ll,ll,ll,ll,lm,lm,lm,lm,ll,ll,lm,lm	TGCAGGAAATAGCGGCCGTCTGTCCACATAGCCGCCTGTGCCTCTGTGACCACCGCCATACCTGCACGCAAACACAAAGATCCCCACCCCCCGGG	scaffold_9372	100	92	0	0	1	92		1486	1577	6e-45	182
scf2413	XXII	76.716	<lmxll>,(ll,lm),ll,lm,ll,ll,ll,ll,ll,lm,ll,ll,lm,lm,ll,ll,lm,lm,lm,lm,ll,ll,ll,ll,lm,lm,lm,lm,ll,ll,lm,--	TGCAGGACTTCTCGTTCCATGTTACGTACCGCAAGGGCTCTCGCCATACGAATGCCAATGCCCTGTCGCGATTGCCAAGGACTGGAGGGTGTGCA	scaffold_2413	100	95	0	0	1	95		27319	27413	1e-46	188
scf8558	XXII	82.346	<efxeg>,(ee,ef,eg,fg),eg,fg,fg,ee,ef,ee,ef,ef,eg,eg,fg,fg,eg,eg,fg,ef,fg,ef,eg,ee,ee,ee,ef,ef,ef,ef,ee,eg,ef,fg	TGCAGGAATCGCGATTCTTCGATGCGTGATTCCCATGTTACAATCTTCATTGAGATGAACAGGATTCTGGCAGGGATTTGCCATGAAAGACTTTT	scaffold_8558	97.89	95	2	0	1	95		22191	22285	6e-42	172
scf8558.1	XXII	83.204	<lmxll>,(ll,lm),ll,lm,lm,ll,lm,ll,lm,lm,ll,ll,lm,lm,ll,ll,lm,lm,lm,lm,ll,ll,ll,ll,lm,lm,lm,lm,ll,ll,lm,lm	TGCAGGAGGTTGCACGGGTCATTCTTCTCGTTCTTACTGCACGCAGCACGCCACACGTCCACACAGCAATAACCACCACCGTCCGCCACCAAGTG	scaffold_8558	100	95	0	0	1	95		14194	14288	1e-46	188
scf8558.2	XXII	83.204	<lmxll>,(ll,lm),ll,lm,lm,ll,lm,ll,--,lm,ll,ll,lm,lm,ll,ll,lm,lm,lm,lm,ll,ll,ll,ll,lm,LM,lm,lm,ll,ll,lm,lm	TGCAGGAATTGTGCTGATGGAGTTCTATAGCTCGTTCTTGGTCGAGGCAGGTATGTGATAGTCGGATATGCAACATGTTGCTCTGCCAGAGATGT	scaffold_8558	98.95	95	1	0	1	95		22194	22100	2e-44	180
scf7557.3	XXII	83.92	<nnxnp>,(nn,np),nn,nn,nn,--,np,np,np,np,nn,--,nn,nn,nn,--,nn,--,nn,np,nn,--,np,--,np,np,np,np,--,nn,np,nn	TGCAGGCCGGGCCCATTGACGGCCCTGGCAGTGGTGGGCGGGCAGACGGCACGGGGCACCCACCCAGATCGTGGTCACGGCGGCCACCGCCCTCG	scaffold_7557	100	95	0	0	1	95		466036	466130	1e-46	188
scf4144.1	XXII	84.062	<nnxnp>,(nn,np),nn,nn,nn,np,np,np,np,np,nn,np,--,nn,--,nn,nn,np,nn,np,nn,np,np,np,np,np,np,np,np,nn,np,--	TGCAGGCTTGATCAAGTTCTTCATGCGTAAATACTCAACATCTCACCAAGACAAGACCCCTCTGTGAGGTATAGCGGAGATAAAATAAAATCTCC	scaffold_4144	100	95	0	0	1	95		15410	15504	1e-46	188
scf5702	XXII	84.062	<hkxhk>,(hh,hk,kk),hk,kk,kk,hh,hk,hh,hk,hk,hk,hh,kk,kk,hk,hk,kk,hk,kk,hk,hk,hh,hh,hh,hk,hk,hk,hk,hh,hk,hk,kk	TGCAGGTGGCCCACGTCAACACCGAGTACGCTGCAGTGTGTGGCGCTCATGAGTGAGGCCACTGCCCCATGTCCAACAGAATCCGGGTACGCCAC	scaffold_5702	98.95	95	1	0	1	95		16147	16241	2e-44	180
scf7557.1	XXII	85.851	<nnxnp>,(nn,np),nn,nn,nn,np,np,--,np,np,nn,np,nn,nn,nn,nn,nn,np,nn,np,nn,np,np,np,np,np,np,np,np,nn,np,nn	TGCAGGTTATTATCTCTGATGGCAGCAACTGCTCCAATATTATATTTTGTAGCGGTTAATCAACAAAGCATTGGAAATTGATGAGGGTCATTTAT	scaffold_7557	97.89	95	2	0	1	95		93726	93632	6e-42	172
scf1909	XXII	87.639	<hkxhk>,(hh,hk,kk),kk,hk,hk,hk,hh,hk,hh,hk,kk,hk,--,hk,kk,kk,hk,hh,hk,hh,kk,hk,hh,hk,hh,hh,hh,hh,hk,kk,hh,hk	TGCAGGTCACGCGTCGACCGTGCAACAGCTGCAGGACCGATGCGAGGCGATGGAAGCGCAGATCTCCTGACCTTGACCTCCCAGCGTGACCCGCT	scaffold_1909	98.95	95	1	0	1	95		12788	12694	2e-44	180
scf1909.1	XXII	87.639	<hkxhk>,(hh,hk,kk),hh,hk,hk,hk,kk,hk,kk,hk,hh,hk,--,hk,hh,hh,hk,kk,hk,kk,hh,hk,kk,hk,kk,kk,kk,kk,hk,hh,kk,hk	TGCAGGATCTAGATGTCAGCTGCGTTCATGGTTAAAATTAATACGTTAATTTATAATTTCAAAATAAATGAGATTACATCCCACTTAATGAGGTG	scaffold_1909	100	95	0	0	1	95		17062	16968	1e-46	188
scf1909.3	XXII	87.639	<lmxll>,(ll,lm),lm,ll,ll,lm,ll,lm,ll,lm,lm,lm,ll,ll,lm,lm,ll,ll,ll,ll,lm,lm,ll,lm,ll,ll,ll,ll,lm,lm,ll,ll	TGCAGGCTTCGTTATCACATTCTCCTCGTCCCCATCGTCTGGCTCGAGGTCGTCTCACCGCGGTGGCGAGGAGATGTTAACTACCTCGCTACGTG	scaffold_1909	98.96	96	0	1	1	95		12785	12880	1e-42	174
scf4144	XXII	87.639	<nnxnp>,(nn,np),nn,nn,nn,np,--,np,np,np,nn,np,nn,nn,nn,nn,nn,np,nn,--,nn,np,--,np,--,--,np,np,np,nn,np,nn	TGCAGGGGAGCTGCGTTGGCTGTGTGCGTCTCTGCAAGTGTAATTGCGGCTGTGGCATGTGTGTCGCCCTCGAACTGTGCAACCAAACTCGGTGT	scaffold_4144	100	95	0	0	1	95		15413	15319	1e-46	188
scf4332	XXII	87.639	<lmxll>,(ll,lm),ll,lm,lm,ll,lm,ll,lm,ll,ll,ll,lm,lm,ll,ll,lm,lm,lm,lm,ll,ll,lm,ll,lm,lm,lm,lm,ll,ll,lm,lm	TGCAGGACTACAGGTGACCGGAACGCCAGTACCAGACCCGTCGGCGTCCGTGGCTGAAGACGCAGCCGCAGCATCGGTTGAGGACTTGGCCACAG	scaffold_4332	100	95	0	0	1	95		7541	7447	1e-46	188
scf4332.1	XXII	87.639	<lmxll>,(ll,lm),lm,ll,ll,lm,ll,lm,ll,lm,lm,lm,ll,ll,LM,--,ll,ll,ll,ll,lm,lm,ll,lm,ll,ll,ll,ll,lm,LM,ll,ll	TGCAGGAATGGAGGGACCGGCAGCAGGTAGACGCGTCTTTGGCACCGTTTCGCCGGGTGGTGGAGACGGCACGTGCCGATGATCTCCCCACGTCA	scaffold_4332	98.95	95	1	0	1	95		8817	8723	2e-44	180
scf4332.2	XXII	87.639	<nnxnp>,(nn,np),nn,nn,nn,np,np,np,np,np,nn,np,nn,nn,nn,nn,nn,NP,nn,np,nn,np,np,np,NP,np,np,NP,np,nn,np,nn	TGCAGGATGGACAGTGTCTGCATTGTCAGTCCTTCGCGTATTAGGCCGTGAGTGTGACAACCTCTTCCCACCCGGCCGAACTGACGATGAAGGTG	scaffold_4332	100	95	0	0	1	95		7538	7632	1e-46	188
scf7557	XXII	87.639	<lmxll>,(ll,lm),lm,ll,ll,lm,ll,lm,ll,lm,lm,lm,ll,ll,--,lm,ll,ll,ll,ll,lm,lm,ll,lm,ll,ll,ll,ll,lm,lm,ll,ll	TGCAGGGGACAGGCGCCTCTTGCTGGCCATCAGGTACTCGCTCACTCACTCGCTTGCCGGGTGGATGCAGTGAAGCGTGTGGGTTGCGAAACAAC	scaffold_7557	98.95	95	1	0	1	95		537923	538017	2e-44	180
scf7557.2	XXII	87.639	<nnxnp>,(nn,np),np,np,np,nn,nn,--,nn,nn,np,nn,np,np,np,NP,np,nn,np,nn,np,nn,nn,nn,nn,--,nn,nn,nn,np,nn,np	TGCAGGCTCACCACCCATACAGCCAGCTCAATAGCGTCTGCCAAACACAATCCACAAGTGGGCACGGCTTCTAGGACAGACACCGCAATGTCCAT	scaffold_7557	100	95	0	0	1	95		466039	465945	1e-46	188
scf768	XXII	87.639	<hkxhk>,(hh,hk,kk),hh,HK,hk,hk,kk,hk,kk,hk,hh,hk,hk,hk,hh,hh,hk,kk,hk,kk,hh,hk,kk,hk,kk,kk,kk,kk,hk,hh,kk,hk	TGCAGGTTCAGTTTTATGTTCATTGGCAGCAACAGTAGAGAATCCAGAATATATAATTAAATATTATCTAACAGCCAATGAAACCAGCCCAATTA	scaffold_768	100	95	0	0	1	95		39264	39358	1e-46	188
scf768.1	XXII	87.639	<lmxll>,(ll,lm),ll,LM,lm,ll,LM,ll,lm,ll,ll,ll,lm,lm,ll,ll,lm,lm,lm,lm,ll,ll,lm,ll,lm,lm,lm,lm,ll,ll,lm,lm	TGCAGGACTCCCTGGGTGGTCGAACCAAAACCTCCATCATCGCCACCATTTCTCCAGCGGCAGTCAACATTGAGGTTGGATTCAAGATGCCTCCT	scaffold_768	100	95	0	0	1	95		22965	23059	1e-46	188
scf1909.2	XXII	132.057	<lmxll>,(ll,lm),--,lm,lm,lm,ll,lm,ll,lm,--,lm,lm,lm,--,--,lm,ll,lm,ll,--,lm,ll,lm,ll,ll,ll,ll,lm,--,ll,lm	TGCAGGGTGAGTCCTGTCTCATATCACTCATCATCAGCCATGGTCTATCTCCTGCCTGGATGAAGACTAATGCGATGTCTCTGATTTGTTAACCC	scaffold_1909	96.84	95	3	0	1	95		17059	17153	1e-39	165
scf3230	IX	0	<nnxnp>,(nn,np),nn,nn,np,nn,np,nn,nn,np,np,nn,np,nn,np,np,nn,nn,nn,nn,nn,nn,nn,nn,np,nn,NP,np,nn,np,nn,nn	TGCAGGGCACCACATTTAGAAATGCGGCGATCGATGACGTCTCCGTGCCTCGCGTGACTCTTCGACTTGTGTAAATATTTGCGGACGGGCAGCGA	scaffold_3230	98.95	95	1	0	1	95		5596	5690	2e-44	180
scf1670	IX	15.508	<hkxhk>,(hh,hk,kk),hh,hk,kk,hk,hh,hh,hh,kk,hk,hh,kk,hk,hk,kk,hk,hk,hh,hh,hk,hk,hk,hk,kk,hk,hk,hk,hh,hk,--,kk	TGCAGGCCCAACAGGTCCAGGAGGGCCTGGATATCCCTGAGGACACACAAATCACCACCTCGTCAACACGTGGACACATCATACAGGAATATTTT	scaffold_1670	97.89	95	2	0	1	95		25903	25997	6e-42	172
scf1670.1	IX	15.508	<hkxhk>,(hh,hk,kk),hh,hk,kk,hk,hh,hh,hh,kk,hk,hh,kk,hk,hk,kk,hk,hk,hh,hh,HK,hk,--,hk,kk,hk,hk,hk,hh,hk,hh,kk	TGCAGGACCTTCAGGAGACAATGGTGATCGGGTGAGATCTCTCGCCACTGTTTAATCTTAAATAGAGTATTAAAATAGACGTAGCTTTACATGTT	scaffold_1670	98.95	95	1	0	1	95		25906	25812	2e-44	180
scf2126	IX	15.508	<lmxll>,(ll,lm),lm,lm,ll,ll,lm,lm,lm,ll,lm,lm,ll,ll,lm,ll,ll,ll,lm,lm,ll,ll,lm,ll,ll,ll,lm,lm,lm,lm,lm,ll	TGCAGGTGTTGTCCGCGCGGCGCGCTCGCATGCCAACGCGAGCGGTCGCGGTGTTTACAAGTCCCCCAGGGGCCGGCCACGCGGACGAAAGCACG	scaffold_2126	100	95	0	0	1	95		21699	21793	1e-46	188
scf2126.1	IX	15.508	<lmxll>,(ll,lm),lm,lm,ll,ll,lm,lm,lm,ll,lm,lm,ll,ll,lm,ll,ll,--,lm,lm,ll,ll,lm,ll,ll,ll,lm,lm,lm,lm,lm,ll	TGCAGGGCTGCTGTGCGACAGTCTATCCATCGCCGAACATTTCTCAGCCCCAACTTGACGACACTCTGGGGACCTCGCGTCGCCCGTTGTTGGCG	scaffold_2126	100	95	0	0	1	95		21702	21608	1e-46	188
scf4731	IX	15.508	<efxeg>,(ee,ef,eg,fg),fg,ef,ee,eg,fg,fg,fg,ee,ef,fg,ee,eg,ef,ee,eg,eg,fg,fg,eg,eg,ef,eg,ee,eg,ef,ef,fg,ef,fg,ee	TGCAGGCGTGCGCGTGTTCACGCAACCGTTTTACCATTAGTCGTAGTGCGTGTGCAGGTTAGAATATAACTGCCCGCAGACGTACGCGTGTTCAC	scaffold_4731	97.89	95	2	0	1	95		12732	12826	6e-42	172
scf4731.1	IX	15.508	<efxeg>,(ee,ef,eg,fg),--,ef,ee,eg,fg,fg,fg,ee,ef,FG,ee,eg,ef,ee,eg,eg,--,fg,eg,eg,ef,eg,ee,eg,ef,ef,fg,ef,fg,ee	TGCAGGCAGTCGCTTCACGCACACCCATATAACAGACACTACATTGAGGCTCTGTGAAAATTTTTATTCACGGCGCGAAACCCTGCACTGCCCGG	scaffold_4731	100	95	0	0	1	95		12735	12641	1e-46	188
scf53	IX	15.508	<hkxhk>,(hh,hk,kk),hk,hh,hk,kk,hk,hk,hk,hk,hh,hk,hk,kk,hh,hk,kk,kk,hk,hk,kk,kk,hh,kk,hk,kk,hh,hh,hk,hh,hk,hk	TGCAGGCCTGAAGGGAAATGAAGGCCCTCAGGGAGCACCAGGACCTCTGGTTAGCCCACTCTTATTCCTGCACCCCCCACTATCGCATCTCGAGC	scaffold_53	98.95	95	1	0	1	95		55575	55481	2e-44	180
scf53.1	IX	15.508	<hkxhk>,(hh,hk,kk),kk,hk,--,hk,kk,kk,kk,hh,hk,kk,hh,hk,hk,hh,hk,hk,kk,kk,hk,hk,hk,hk,hh,hk,hk,hk,kk,hk,kk,hh	TGCAGGAGCAGGAAGGCATGAGCCACGTGGTGAGCCAGCGCCACATTCACCATGCAAGCTCTGAGGTCCTTGACATATTAATATGTTCAGGCGTT	scaffold_53	100	95	0	0	1	95		31204	31110	1e-46	188
scf53.2	IX	15.508	<lmxll>,(ll,lm),lm,lm,ll,ll,lm,lm,lm,ll,lm,lm,ll,ll,lm,ll,ll,ll,LM,lm,ll,ll,lm,ll,ll,ll,lm,lm,lm,lm,lm,ll	TGCAGGTTACTCCCCTTTATCTATGCCAAAAGGCATGGATACAATTGGGTGAAAGTCATCCTTCTCTGAGGCCACATCTGGGTCGGTTATGGTTG	scaffold_53	98.95	95	1	0	1	95		40421	40515	2e-44	180
scf53.3	IX	15.508	<nnxnp>,(nn,np),--,nn,nn,np,np,np,np,nn,nn,np,nn,np,nn,nn,np,np,np,np,NP,NP,nn,np,nn,np,nn,nn,np,nn,np,nn	TGCAGGCAAGTCTACCAGCATGGTTAGTCGACGGAAATGGCAGTCATGAAGGTCATCCATGATGTATTCATGGCAGCTGATCGTGGTGGAGTCAC	scaffold_53	100	95	0	0	1	95		186975	187069	1e-46	188
scf53.4	IX	15.508	<nnxnp>,(nn,np),nn,--,np,nn,nn,nn,nn,np,--,nn,np,nn,--,NP,nn,nn,nn,nn,nn,nn,--,nn,np,nn,--,--,nn,--,nn,np	TGCAGGGATTTTATGAATGTTTATACGTCTTATTCATCATAATATTATCACCTGGAAAATCCTTTGTGATGGAACGTCTCGTTGCAAGGGTTGTG	scaffold_53	98.95	95	1	0	1	95		32663	32569	2e-44	180
scf53.5	IX	15.508	<nnxnp>,(nn,np),np,nn,nn,np,np,np,np,nn,nn,np,nn,np,nn,nn,np,np,np,np,np,np,nn,np,nn,NP,nn,nn,np,nn,np,nn	TGCAGGACCATCCCTATTGACTCGATGAGGGGGTTCGGGCAGGATTGCTGGCCGCAACTTCGAAATGCTGTCTGGCCCGAGCATGGACGATGGAC	scaffold_53	100	95	0	0	1	95		823510	823604	1e-46	188
scf53.6	IX	15.508	<nnxnp>,(nn,np),np,nn,nn,np,np,np,np,nn,nn,np,nn,np,nn,nn,np,np,np,np,np,np,nn,np,nn,np,nn,nn,np,nn,np,nn	TGCAGGTTGAGGATGAGGCTGTTTCGCTCAAGAAAGGCCGCAAGCTGATAATACCGGTCGTTTGACTATTTTGATATAAATGTCAAATTGGAAAT	scaffold_53	100	95	0	0	1	95		186978	186884	1e-46	188
scf53.7	IX	15.508	<nnxnp>,(nn,np),np,nn,nn,np,np,np,np,nn,nn,np,nn,np,nn,nn,np,np,np,np,np,np,nn,np,nn,np,nn,nn,np,nn,np,nn	TGCAGGAGGTAGCGATATCCACATTCAGATAAACGTGGATAATGAGATCGACCAAGGTCACTCCCCGCACCAGTACTCGCATCACCTGTACACAT	scaffold_53	100	95	0	0	1	95		40424	40330	1e-46	188
scf357.3	IX	21.265	<nnxnp>,(nn,np),np,nn,nn,np,nn,np,np,nn,nn,np,nn,np,nn,nn,np,np,np,np,np,np,nn,np,nn,np,nn,nn,np,nn,np,np	TGCAGGTCCTTATGAACCCATGTTTTCCAGCCAATTGTCAAAACATGGATCAATTTGACTGGCAGGTTACATTTTTTGGTCGTCAAACTGCCAGT	scaffold_357	97.89	95	2	0	1	95		142920	143014	6e-42	172
scf357.4	IX	21.265	<nnxnp>,(nn,np),np,nn,nn,np,nn,np,np,nn,nn,np,nn,np,nn,nn,np,np,np,np,np,np,nn,np,nn,np,nn,nn,np,nn,np,np	TGCAGGACTAAAATGTAAAACCTGTTATGGTAAAATAGATCCCTGTTTCTATTACTCATGAAGCTGCTTTGGATGCAGTTTTAAATTACATTTTA	scaffold_357	98.95	95	1	0	1	95		142923	142829	2e-44	180
scf18274	IX	30.242	<lmxll>,(ll,lm),lm,ll,ll,ll,lm,lm,lm,ll,lm,lm,lm,ll,lm,ll,ll,ll,lm,lm,ll,ll,lm,ll,ll,ll,lm,ll,lm,lm,lm,ll	TGCAGGTACCCAATCCACACCGTGTCTTCTTCACGCAGTAATGCGTGCACTCCTCTGCCTAGCTTCAGTTTCCTGAGCATCGTTGTGCAGAAAAT	scaffold_18274	98.95	95	1	0	1	95		1467	1373	2e-44	180
scf196	IX	30.242	<hkxhk>,(hh,hk,kk),hh,kk,kk,hk,hk,hh,hh,kk,hh,hh,hk,hk,hk,kk,hk,hk,hh,hh,hk,hk,hk,hk,kk,kk,hk,hk,hh,HK,hh,hk	TGCAGGCAGGCACCAAGCACACATTATTGCTCCATCGCTGCACGATTCACCAACGCCTAAGCCACTGCATTACAGGTATTTGCAAATGAATTCAG	scaffold_196	100	95	0	0	1	95		136892	136986	1e-46	188
scf2970	IX	30.242	<hkxhk>,(hh,hk,kk),kk,hh,hh,hk,hk,kk,kk,hh,--,kk,hk,hk,hk,hh,hk,hk,kk,kk,hk,hk,hk,hk,hh,hh,hk,hk,kk,HK,kk,hk	TGCAGGTGAGGACGGAGCTGCGACGGCAACGAGGAGGGACGCCGACCGACAGTAACAAACTACAGATGGATGGGACGAGGTAGCGGGACGTCTGG	scaffold_2970	97.89	95	2	0	1	95		64473	64379	6e-42	172
scf3424	IX	30.242	<hkxhk>,(hh,hk,kk),kk,--,hh,hk,hk,kk,kk,hh,kk,kk,hk,hk,hk,hh,hk,hk,kk,kk,hk,hk,hk,hk,hh,hh,hk,hk,kk,hk,kk,hk	TGCAGGCTTCTAGTAGGCAGTTAAACCAAGTAGGTCTCTGGCAGGATTTCATATTTTCTGCTGACAGTTAGAATCAGAATCTTTATGTATAGTGG	scaffold_3424	100	95	0	0	1	95		25249	25155	1e-46	188
scf3424.1	IX	30.242	<hkxhk>,(hh,hk,kk),kk,hh,hh,hk,hk,kk,kk,hh,kk,kk,hk,hk,hk,hh,hk,hk,kk,kk,hk,hk,hk,hk,hh,hh,hk,hk,kk,HK,--,hk	TGCAGGTTCTACCTCTGTGTGATCCACCAACCCTGGCCAATTATGGGTGTGGTTCGTCATGGCCAGGTCAGCCAGCCAATTATTGTAAGACTGTG	scaffold_3424	98.95	95	1	0	1	95		25246	25340	2e-44	180
scf3915	IX	30.242	<lmxll>,(ll,lm),lm,ll,ll,ll,lm,lm,lm,ll,lm,lm,lm,ll,lm,ll,ll,ll,lm,lm,ll,ll,lm,ll,ll,ll,lm,ll,lm,lm,lm,ll	TGCAGGGATGATGAGCTGAGCTGATCCTCTAACAGGAGTGCGAGCCACTCAACTCTGCCGCTGAGACACCTGGTTGCGTGTGTGTCATGTATGTG	scaffold_3915	98.95	95	1	0	1	95		21268	21362	2e-44	180
scf4267	IX	30.242	<nnxnp>,(nn,np),np,nn,nn,np,nn,np,np,nn,np,np,nn,np,nn,nn,np,np,np,np,np,np,nn,np,nn,nn,nn,np,np,nn,np,np	TGCAGGATTTCTTGCAACAGACAACGACTTGGTGTCTAAAAACTTTGGGTGAAGGGGGTCACACTGCATTGCCCTGGCCATGAGAAGTACAGAAC	scaffold_4267	100	95	0	0	1	95		7585	7679	1e-46	188
scf901.1	IX	30.242	<lmxll>,(ll,lm),lm,ll,ll,ll,lm,lm,lm,ll,lm,lm,lm,ll,lm,ll,ll,ll,lm,lm,ll,ll,lm,ll,ll,ll,LM,ll,lm,lm,lm,ll	TGCAGGAGTAATTAGCAACTATTACTGTATAACTATTACAAAGAGCACATAATTTTAAAAAAACATATTGCTTCCTTCAAAAGCTTCCCAATGCA	scaffold_901	98.95	95	1	0	1	95		20278	20372	8e-32	139
scf7102	IX	31.105	<nnxnp>,(nn,np),np,nn,nn,np,nn,np,np,nn,np,np,nn,np,nn,nn,np,np,np,np,np,np,nn,np,nn,nn,nn,np,np,nn,np,np	TGCAGGGACCTGTTATCGCAAGAGCGTTCCAGACGGCCGCAGAAGCGCATCTGAAAGCGCGCGATGCAGTGACCCTCATTGGTTGATGGCTCAGC	scaffold_7102	98.95	95	1	0	1	95		14367	14461	2e-44	180
scf2368	IX	31.967	<nnxnp>,(nn,np),np,nn,nn,np,nn,np,NP,nn,np,np,nn,np,nn,nn,np,np,np,np,np,np,nn,np,nn,nn,nn,np,NP,nn,np,np	TGCAGGGCAGCACAAGGTGGCAGCCTGCAGCATTTTGCAGCAGCCGCCGCATATTCGGTTATCCCGATTACTGACTTTCCCAAAATTTCAGGGGG	scaffold_2368	100	95	0	0	1	95		113490	113396	1e-46	188
scf510	IX	31.967	<efxeg>,(ee,ef,eg,fg),fg,ee,ee,eg,ef,fg,fg,ee,fg,fg,ef,eg,ef,ee,eg,eg,fg,fg,eg,eg,ef,eg,ee,ee,ee,eg,fg,ef,fg,eg	TGCAGGGTTTCCCTCCACGTTTAGAAACGTGCGTTTAGAATATTTGGCTGCCACTGTAAAATTTCCACGCGATAAGACACTTTGTTGAGCTATCA	scaffold_510	100	95	0	0	1	95		143061	143155	1e-46	188
scf13022	IX	35.417	<efxeg>,(ee,ef,eg,fg),ee,fg,fg,ef,eg,ee,ee,fg,ee,ee,eg,ef,eg,fg,ef,ef,ee,ee,ef,ef,eg,ef,fg,fg,eg,ef,ee,ee,ee,ef	TGCAGGGCAGCACACTCGAGCTGAGCACATGTGCACGCTCACTCCCATATAGCCTTTGCGACAGGCTGCTGGGGCAAGTGCTGTTAGCGAGCACC	scaffold_13022	97.89	95	2	0	1	95		6253	6159	6e-42	172
scf13022.1	IX	35.417	<lmxll>,(ll,lm),lm,ll,ll,ll,lm,lm,lm,ll,lm,lm,lm,ll,--,ll,ll,ll,lm,lm,ll,ll,lm,ll,ll,ll,lm,ll,lm,lm,lm,ll	TGCAGGCTGTGGAGCAGCTCGTGTGCCTGCTGGACATGATGGATCGCTGGATCGAAGAGGTTCCGCCTGTGGATCAGCCCCAACGCTTCGGCAAC	scaffold_13022	100	95	0	0	1	95		6250	6344	1e-46	188
scf196.1	IX	35.417	<lmxll>,(ll,lm),--,ll,ll,ll,lm,--,--,ll,--,--,lm,ll,lm,ll,ll,ll,--,--,ll,ll,lm,ll,ll,ll,lm,ll,--,lm,--,ll	TGCAGGGACCTGTTTATGAACTCCTACATTTGAACCTGATGGCACGACCCCGGGTCCCATAAGCCCCCGGTTCTCGCATAAACATTCTATTATAA	scaffold_196	98.95	95	1	0	1	95		319798	319704	2e-44	180
scf901	IX	35.417	<efxeg>,(ee,ef,eg,fg),eg,ef,ef,fg,ee,eg,eg,EF,eg,eg,ee,fg,ee,ef,fg,fg,--,eg,fg,fg,ee,fg,--,ef,ee,fg,eg,eg,eg,--	TGCAGGCTAAATGAAACTGTTACGTGACGCAGCCTAGATAGGCCGTTGCAAATCAATTCAATTTAAAAGATAATTTACAGCAAGAGAATGTGAGT	scaffold_901	98.95	95	1	0	1	95		60059	59965	2e-44	180
scf901.2	IX	35.417	<nnxnp>,(nn,np),nn,np,np,nn,np,nn,nn,np,nn,nn,np,nn,np,np,nn,nn,nn,nn,nn,nn,np,nn,np,np,np,nn,nn,nn,--,nn	TGCAGGCTCATTTGCCATTCCTTTATCCCCTGCGTGCCTCTCCCAAACTGCAGGGCTCTATGCCAAACCCCTACGCAGCGTTGCAAAGGTTCAGC	scaffold_901	100	95	0	0	1	95		60056	60150	1e-46	188
scf193	IX	41.019	<nnxnp>,(nn,np),np,nn,nn,np,nn,np,np,nn,np,np,nn,np,nn,nn,np,nn,np,np,np,np,nn,np,nn,nn,nn,np,np,np,np,np	TGCAGGCAAAACAGGTGTGAGTCTTTAGAGAAGAACTAAACAGGGCGAGTGAGCACGCCTCTCTAACCACTGGTGATAGGACATTCCATAGTCTT	scaffold_193	100	95	0	0	1	95		59526	59620	1e-46	188
scf193.1	IX	41.019	<nnxnp>,(nn,np),np,nn,nn,np,nn,np,--,nn,np,np,nn,np,nn,nn,np,nn,np,np,np,np,nn,np,nn,nn,nn,np,np,np,np,np	TGCAGGCCTACACTTTCCATGTACGACCAGCAGACTCTGGACTTTGTAGTATTTATGTTTCCTTACTTCATGCATGGCGCCCTGAGATCCATGGA	scaffold_193	100	95	0	0	1	95		59529	59435	1e-46	188
scf13225	IX	46.62	<nnxnp>,(nn,np),nn,np,np,nn,np,nn,nn,np,nn,nn,np,nn,np,np,nn,np,nn,nn,nn,nn,np,nn,np,np,np,nn,nn,nn,np,nn	TGCAGGCAGTGTAACCAAGCACTGTCCCCAACTTTCCATGGAAGCACGTACTCCCGCCGCCCTGCACTCTTTTTGTTAGCCACCTGCACTTTCGT	scaffold_13225	100	95	0	0	1	95		2315	2409	1e-46	188
scf76.2	IX	46.62	<hkxhk>,(hh,hk,kk),kk,hh,hh,kk,hh,kk,kk,hh,kk,kk,hk,kk,hk,hh,hk,hh,kk,kk,kk,hk,hk,hk,hh,hh,hk,hk,kk,kk,hk,hk	TGCAGGACTACCAATTCACGACCACTTGCCAGAAGGGTATTCGCCATACAAACGCTGATGCCCTTTCGCGACTGCCCGTCGGCGGGGAATGTGCA	scaffold_76	98.95	95	1	0	1	95		318480	318574	2e-44	180
scf1271	IX	62.336	<lmxll>,(ll,lm),lm,ll,ll,lm,ll,lm,lm,ll,lm,lm,lm,lm,lm,ll,lm,ll,lm,lm,lm,ll,lm,lm,ll,ll,lm,ll,lm,lm,lm,lm	TGCAGGAGGTGACCGATATTGTGAGTCTCTGCCTAGGGGACCGCAATCCTGTTGTGCAGCTGCACGGAGCTAAGGTGAGCATCGTTTGGCCATAG	scaffold_1271	98.95	95	1	0	1	95		31776	31682	2e-44	180
scf3181	IX	62.336	<lmxll>,(ll,lm),ll,lm,LM,ll,lm,ll,ll,lm,ll,ll,ll,ll,ll,lm,ll,lm,ll,ll,ll,lm,ll,ll,lm,lm,ll,lm,ll,ll,ll,ll	TGCAGGAGTGATGTGTGAAGCAGTTGCATTCGGCGCGGGTGTGATATGGTGAACTGATGCGACTTGGGGTTGCGATGCTATTTAAGACATGTTTT	scaffold_3181	100	95	0	0	1	95		7267	7361	1e-46	188
scf3295	IX	62.336	<hkxhk>,(hh,hk,kk),hk,hh,--,kk,hh,kk,kk,hk,kk,hk,hk,kk,kk,hh,kk,hh,kk,kk,kk,hk,hk,--,hk,hh,hk,hk,kk,kk,hk,kk	TGCAGGGTTATTACAGCCCTCGCAACGGAACATTTTCACTGGAGGTTTAGTGCTGCAAATTTTGAGGCGAAAGAAATCTGCATCTGTGCAAGTGG	scaffold_3295	98.95	95	1	0	1	95		22561	22655	2e-44	180
scf3295.1	IX	62.336	<hkxhk>,(hh,hk,kk),hk,hh,hh,kk,hh,kk,kk,hk,kk,hk,hk,kk,kk,hh,kk,hh,kk,kk,kk,hk,hk,kk,hk,hh,hk,hk,kk,kk,hk,kk	TGCAGGACAGTCCAACAAACCCATGTACATACAAGCCCATATGAATCCAAAAACCAGGGTCTGGGTGCACACTATTTTGTAGGACTTAACATAGG	scaffold_3295	100	95	0	0	1	95		22564	22470	1e-46	188
25514	IX	64.06	<efxeg>,(ee,ef,eg,fg),ef,eg,ee,fg,ee,fg,fg,eg,fg,ef,ef,fg,fg,ee,fg,ee,fg,fg,fg,eg,ef,fg,eg,ee,ef,eg,fg,fg,ef,fg	TGCAGGTTAAACAAACCTGGCCTGGTCCTCCACAGTATTGCCCTCTCCGAGGCAGCCGACCTAGGGACATCTGCAAGTCTTCCCGAGACGTTAAA
scf9798	IX	67.212	<nnxnp>,(nn,np),np,nn,--,nn,--,nn,nn,--,nn,np,np,nn,nn,nn,--,--,nn,nn,nn,nn,np,nn,nn,--,NP,nn,nn,nn,np,nn	TGCAGGTAATGATTGTCATCGATTGATCCTGGCTGCAGACATTGGTAGGTCACAAATAATAATGAAGATAAGAGAGCAGTTTCACTGTACTATGC	scaffold_9798	100	95	0	0	1	95		1615	1521	1e-46	188
scf3855	IX	70.331	<nnxnp>,(nn,np),nn,np,nn,np,nn,np,--,nn,np,nn,nn,np,np,np,np,nn,np,np,np,nn,nn,np,np,nn,nn,np,np,np,nn,np	TGCAGGCCGATTTCAGGCGTGCACAACACACCAAGCCGTGGCCTCCATCTCCTTCCATGGTCAGTGCCAAAGGGATCGTCGTGGCTGGCAGTGGG	scaffold_3855	100	95	0	0	1	95		21487	21393	1e-46	188
scf1713	IX	76.433	<hkxhk>,(hh,hk,kk),--,hh,hk,hk,hk,hk,hk,hk,hk,kk,kk,hk,hk,hh,hk,hk,hk,hk,hk,hh,kk,hk,hh,hk,HK,hh,hk,hk,kk,hk	TGCAGGACGTTTGGTATGGTCTGCTTCTCATCCTCCTCGTACTTGCGCTTCTTGGGGGATGACACTGGTACCCTGCCCGCAGAGCAGCAGCAAAT	scaffold_1713	100	95	0	0	1	95		35778	35684	1e-46	188
scf2190.1	IX	77.036	<lmxll>,(ll,lm),ll,lm,--,ll,--,ll,ll,ll,ll,ll,ll,ll,ll,lm,ll,--,ll,ll,ll,lm,ll,ll,lm,--,ll,lm,ll,ll,ll,ll	TGCAGGAAGATAGACATTATACTGGTAGGAAACGTAGTGGACTGGAAGCCCAACCGGGATTAATTTACAGGAGGCAGGGGATTAATTGTGTATGT	scaffold_2190	100	95	0	0	1	95		293	199	1e-46	188
scf2190.2	IX	77.036	<lmxll>,(ll,lm),ll,lm,lm,ll,lm,ll,ll,ll,ll,ll,ll,ll,ll,lm,ll,lm,ll,ll,ll,lm,ll,--,lm,lm,--,lm,ll,ll,ll,ll	TGCAGGGGGGCCGACCACAACGAGTGTGGGACATCGCTGACTGTCAGGCGTGCCGTGGATGTGCAAGTGTGCAAGTCAGGCCGCAGCCACCATCA	scaffold_2190	98.95	95	1	0	1	95		7498	7404	2e-44	180
36637	IX	80.138	<efxeg>,(ee,ef,eg,fg),ee,fg,ef,eg,ef,eg,eg,eg,eg,ee,ee,eg,eg,fg,eg,ef,eg,eg,eg,fg,ee,eg,fg,ef,ee,fg,fg,eg,ee,eg	TGCAGGCCTTTCAGAGGCTTGCCTTTTGGGAATTGCATTTGAGACAAACATGGGTTTGTGTGTGTGTGTATATATATTGTGGTGAGCAGTGCCAC
scf1996	IX	80.138	<nnxnp>,(nn,np),np,nn,NP,nn,np,nn,nn,nn,nn,np,np,nn,nn,nn,nn,np,nn,nn,nn,nn,np,nn,nn,np,np,nn,nn,nn,np,nn	TGCAGGTGCACATTTTTGTACTAAAGACAAAGATCTCCCGTGTATGTATAGTGAACTTCTTTCACACCATACGTCGCCAAACCGTGCTAATCAGA	scaffold_1996	100	95	0	0	1	95		28830	28736	1e-46	188
scf2115	IX	80.138	<nnxnp>,(nn,np),np,nn,np,nn,np,nn,nn,nn,nn,np,np,nn,nn,nn,nn,np,nn,nn,nn,nn,np,nn,nn,np,np,nn,nn,nn,np,nn	TGCAGGCCACAGCTATAACAACAGCAGCTTGTGTTGAGCGATATCTGAGTTGGTCCTGGGTTCCCCTCCCGTTTCACCACTCACCAGCAACGTGC	scaffold_2115	100	95	0	0	1	95		35815	35721	1e-46	188
scf2115.1	IX	80.138	<nnxnp>,(nn,np),np,nn,np,nn,np,nn,nn,nn,nn,np,NP,nn,nn,nn,nn,np,nn,nn,nn,nn,np,nn,nn,np,np,nn,nn,nn,np,nn	TGCAGGGTACTTTCACTGTACTTTATTCACAAAGATCTGAAACTGTCACCGTGGCTGGATCAAAACAACTACAATGGCTGTTCTGTGCGATTTTC	scaffold_2115	100	95	0	0	1	95		14957	15051	1e-46	188
scf2115.2	IX	80.138	<nnxnp>,(nn,np),np,nn,np,nn,np,nn,nn,nn,nn,np,np,nn,nn,nn,nn,np,nn,nn,nn,nn,np,nn,nn,np,np,nn,nn,nn,np,nn	TGCAGGAATTCAAACCGCGTGCCATAGCGCAGGACACCAACCAACGCATCACCTTCTTAACGTGTCCGTCCCGATTCACCCCTGTTTTAGACGTC	scaffold_2115	100	95	0	0	1	95		35812	35906	1e-46	188
scf2190	IX	80.138	<lmxll>,(ll,lm),lm,ll,ll,LM,ll,lm,lm,lm,lm,lm,lm,lm,lm,ll,lm,ll,lm,lm,lm,ll,lm,lm,ll,ll,lm,ll,ll,lm,lm,lm	TGCAGGCGGAGCGGCCAGCCTCGCCGCTTTGGAATGAATAAGGATCTCACCGCGGAATTCATTTGATTGGATTTCTTTTGTCTTGATTGAGCTCA	scaffold_2190	98.95	95	1	0	1	95		34533	34439	2e-44	180
scf2507	IX	80.138	<nnxnp>,(nn,np),nn,np,nn,np,nn,np,np,np,np,nn,nn,np,np,np,np,nn,np,np,np,np,nn,np,np,nn,nn,np,np,np,nn,np	TGCAGGTGCCTAGAGTGATTCGTTGTATCCTGAGCTTGTTAATCATCGCTGCACAAACTCAGGAGTGTACTTCAGTAGCACGGTCAATTCTAACA	scaffold_2507	98.95	95	1	0	1	95		4795	4701	2e-44	180
scf4339	IX	80.138	<lmxll>,(ll,lm),ll,lm,lm,ll,lm,ll,ll,ll,ll,ll,ll,ll,ll,lm,ll,lm,ll,ll,ll,lm,ll,ll,lm,lm,ll,lm,lm,ll,ll,ll	TGCAGGGACCTGTTTAGGTACAGCCCTGTGAGCCATGCGGCTCTTGAGTCGGGTGCAACCGCAACAAAAAAATATGAACAGAGAAACATCTTAAA	scaffold_4339	98.95	95	1	0	1	95		14957	15051	8e-32	139
scf453	IX	80.138	<nnxnp>,(nn,np),nn,np,nn,np,nn,np,np,np,np,nn,nn,np,np,np,np,nn,np,np,np,np,nn,np,np,nn,--,np,np,np,nn,np	TGCAGGTAGGAGACAAGGCATGCTTCACAGAGTGAAGTGGGAGGCAGCGTGGGATGAGAACATCGGAGAGTCGACAACATGGATTTTATAAAGCT	scaffold_453	100	95	0	0	1	95		174059	174153	1e-46	188
scf756	IX	80.138	<lmxll>,(ll,lm),ll,lm,lm,ll,lm,ll,ll,ll,ll,ll,ll,ll,ll,lm,ll,lm,ll,ll,ll,lm,ll,ll,lm,lm,ll,lm,lm,ll,ll,ll	TGCAGGAATGCGACCATCTAAACGGCAAAACTTTGAACCTTCGAAATACATTGTAATATCGGGGAGGATCAGTGGTGGAGGATGGCTTTCGCGGG	scaffold_756	98.95	95	1	0	1	95		56634	56728	2e-44	180
scf756.1	IX	80.138	<lmxll>,(ll,lm),ll,lm,lm,ll,lm,ll,ll,ll,ll,ll,ll,ll,ll,lm,ll,lm,ll,ll,ll,lm,ll,ll,lm,lm,ll,lm,lm,ll,ll,ll	TGCAGGAACCCGTCCAGTGGTCTAGACTGTTGTTATGATGTCATGTAGGGCAGTCTGTGCACAAACGCCACCCTCCCTCCGCATTTCGCTTGCGA	scaffold_756	100	95	0	0	1	95		49621	49715	1e-46	188
scf652.1	IX	82.066	<nnxnp>,(nn,np),np,nn,np,nn,np,nn,nn,nn,nn,np,--,nn,nn,nn,nn,np,nn,nn,nn,nn,np,nn,nn,np,np,nn,nn,nn,np,nn	TGCAGGGAATACGACTATATTTGTTTGCATGTCTATACATATATACGTACCTCCACCAACCCATACTGACCAGTGTGGTGAAGTATGGTCCAATA	scaffold_652	100	95	0	0	1	95		121351	121445	1e-46	188
scf652	IX	83.576	<efxeg>,(ee,ef,eg,fg),--,ef,fg,ee,fg,ee,ee,ee,ee,eg,ee,ee,ee,ee,ee,fg,ee,ee,ee,ef,eg,ee,ef,fg,eg,ef,ef,ee,--,ee	TGCAGGATTAACTAACTAATAAAGGATTTTTTCATGAATTTCAATGGAAGAATTTTTTTTGGTAGAAGTCTTTACTGGTAAGACAACATTTTTAA	scaffold_652	100	95	0	0	1	95		121354	121260	2e-32	141
scf1960	IX	88.605	<lmxll>,(ll,lm),ll,lm,lm,ll,lm,lm,ll,--,ll,lm,ll,ll,--,ll,--,lm,ll,ll,ll,lm,ll,--,lm,lm,ll,--,lm,ll,ll,ll	TGCAGGAAAGAAAACTTGTCACGCTGTTCCCTGAGCAGCATGGCGATGCGCGAGTCCAGGCTCGACTGCTGCTCGTCAACCACTGCCTCCTCGCG	scaffold_1960	98.95	95	1	0	1	95		33031	33125	2e-44	180
scf146	IX	89.746	<nnxnp>,(nn,np),np,nn,np,nn,np,nn,nn,nn,nn,np,nn,nn,nn,nn,nn,np,nn,nn,nn,nn,np,nn,nn,--,np,nn,nn,np,np,nn	TGCAGGGGCTTGTTTTGTTTGTAAAAAGTGGTATACCCCGCGGGTTATATGCGGGAAAATACAATATATGCTTCTGGTAGCTTAGCAACCAGACT	scaffold_146	100	95	0	0	1	95		171828	171922	1e-46	188
scf197	IX	93.607	<lmxll>,(ll,lm),lm,ll,ll,lm,ll,lm,lm,lm,lm,ll,lm,lm,lm,lm,lm,ll,ll,lm,lm,ll,lm,lm,ll,ll,lm,ll,ll,lm,lm,lm	TGCAGGTGACAATGGGGTTGGTGGATAAGAGGTGGGAGCTAACTGAGTTAAGTTTATCAGCAAAAGGTATCCACATTTTTTAAAATATGTACATT	scaffold_197	100	95	0	0	1	95		331582	331488	1e-46	188
scf1080	IX	95.948	<nnxnp>,(nn,np),np,nn,np,nn,np,nn,nn,nn,nn,np,nn,nn,nn,nn,nn,np,nn,nn,np,nn,np,nn,nn,np,np,nn,--,np,np,nn	TGCAGGGTAATCGCTGCCGCGAAGGTTTTCACGGTTGTGCTGTGTGTTGTTCAGCGCGATGTCCGACGTTTCACACCACGTGCCGGGAGCTTCAG	scaffold_1080	100	95	0	0	1	95		52616	52710	1e-46	188
scf197.1	IX	96.006	<lmxll>,(ll,lm),LM,lm,lm,ll,lm,ll,ll,ll,ll,lm,ll,ll,ll,ll,ll,lm,lm,ll,ll,lm,ll,ll,lm,lm,ll,lm,lm,ll,ll,ll	TGCAGGTCCAGCATGCTTTGCTACACGTTTGGACACAGCTATGCGCCAGCGGCCACAATGGAACGGATCAGATCACAACGTTACTCGGACCAGAA	scaffold_197	100	95	0	0	1	95		414023	414117	1e-46	188
scf392	IX	100.982	<efxeg>,(ee,ef,eg,fg),fg,ee,eg,ef,eg,--,ef,ef,ef,eg,ef,ef,ef,ef,ef,eg,ee,ef,fg,ee,fg,ef,ee,--,fg,--,ee,eg,fg,ef	TGCAGGACATTTTGAAGGTGATCACACTGTGTTGATGAAATCAAGCCTGTTTGCCGGTAAAGCGCTTTTTGTCATGTCAAACAGGACACACGTTG	scaffold_392	98.95	95	1	0	1	95		17498	17592	2e-44	180
scf392.2	IX	101.3	<nnxnp>,(nn,np),nn,np,nn,np,nn,np,np,np,np,nn,np,np,np,np,np,nn,np,np,nn,np,nn,np,np,nn,nn,nn,np,--,nn,np	TGCAGGCACGAAAGCTTCAAATCATTATTGGAGGCAATTCTTTCATTAAACACCGAGCACACTTTTGTACACTTTATACAATACACACCCTACAC	scaffold_392	100	95	0	0	1	95		20306	20400	1e-46	188
4570	IX	111.437	<efxeg>,(ee,ef,eg,fg),ee,fg,ef,eg,ef,eg,eg,eg,eg,ef,eg,eg,eg,eg,eg,ef,ef,eg,ee,fg,ee,ee,ef,ef,ee,ef,ef,ef,eg,eg	TGCAGGACGAGTTCCATCCCTCGGCTGCTGCTCCACCATTTTTCTTGCCCATCGGGTCGTCATCCCTCTTCTAGCGATGAAATGTCCTGCCCAAG
scf1001	IX	111.437	<efxeg>,(ee,ef,eg,fg),eg,ef,fg,ee,fg,ee,ee,ee,ee,fg,ee,ee,ee,ee,ee,fg,fg,ee,eg,ef,eg,eg,fg,fg,eg,fg,--,fg,ee,ee	TGCAGGGAGTGTAAAACCGAAGCATCTCAAGGGAAAGCCACACGTAATGAGAAGCATGGCACTCAAGAGGTCCGCACGGACAGGTTCAATTGCCC	scaffold_1001	97.89	95	2	0	1	95		51445	51351	6e-42	172
scf1339	IX	111.437	<nnxnp>,(nn,np),np,nn,np,nn,np,nn,nn,nn,nn,np,nn,nn,nn,nn,nn,np,np,nn,np,nn,np,np,np,np,np,np,np,np,nn,nn	TGCAGGGTGCCCCAGTCGTGTACGACCTGTCACGTGCGTCATGTATCAGTTCTGCAATGTGTGTTGGTGCTTTTTAAACTTCGCTTTTGTTGTTG	scaffold_1339	100	95	0	0	1	95		11513	11607	1e-46	188
scf1339.1	IX	111.437	<nnxnp>,(nn,np),np,nn,np,nn,np,nn,nn,nn,nn,np,nn,nn,nn,nn,nn,np,np,nn,np,nn,np,np,np,np,np,np,np,np,nn,nn	TGCAGGACTCACCTATTTCTTTCATGATACCCCGTATCCTGGTTCTGCTCTTCACTTTCTGTATTTAAGACCGGACACGAGGAAGACTTCTACAC	scaffold_1339	100	95	0	0	1	95		11516	11422	1e-46	188
scf1694	IX	111.437	<hkxhk>,(hh,hk,kk),hk,hk,kk,hh,kk,hh,hh,hh,hh,kk,hh,hh,hh,hh,hh,kk,kk,hh,hk,hk,hk,hk,kk,kk,hk,kk,kk,kk,hh,hh	TGCAGGAAGCCCTGACCTACGATGGAGCGGTGAGTCCGTCCGGCGACGAGTCCACTTCATGTTATACTCCGGTCACAACACCGATATCTGGCGAG	scaffold_1694	97.89	95	2	0	1	95		17704	17610	6e-42	172
scf1694.1	IX	111.437	<hkxhk>,(hh,hk,kk),HK,hk,hh,kk,hh,kk,kk,kk,kk,hh,kk,kk,kk,kk,kk,hh,hh,kk,hk,hk,hk,hk,hh,hh,hk,hh,hh,hh,kk,kk	TGCAGGGATTGCCGTAGGCTTAAGCCATGTGACCTTTAAACAGGGATAGGTCATGTCTTTGGTAAGTTTCTAATTTGGTAAACACAATCTCAATA	scaffold_1694	100	95	0	0	1	95		1807	1901	1e-46	188
scf1694.2	IX	111.437	<nnxnp>,(nn,np),np,nn,np,nn,np,nn,nn,nn,nn,NP,nn,nn,nn,nn,nn,np,NP,nn,np,nn,np,np,np,NP,np,np,np,np,nn,nn	TGCAGGTTCAGGGAAACCCGCCGGCCACGATGGCGAAAAAAAAGTAACCAAATTGTGATAAATCATATCGTCGTGATGTTTGATATACCTGTCGA	scaffold_1694	100	95	0	0	1	95		3567	3473	2e-32	141
scf1947	IX	111.437	<hkxhk>,(hh,hk,kk),hk,hk,hh,kk,hh,kk,kk,kk,kk,hh,kk,kk,kk,kk,kk,hh,hh,kk,hk,hk,hk,hk,--,hh,hk,hh,hh,hh,kk,kk	TGCAGGTTACCTGGCCACGCGCCCACCTAAGTGTTGTGCGGCGTCACTTCCCGTTGATGCTTTTAGGCAAGGCTCACTGGAGCAGCGCATGTGTG	scaffold_1947	98.95	95	1	0	1	95		5047	4953	2e-44	180
scf2638	IX	111.437	<hkxhk>,(hh,hk,kk),hk,hk,--,kk,hh,kk,kk,kk,kk,hh,kk,kk,kk,kk,kk,hh,hh,kk,hk,hk,hk,hk,hh,hh,hk,hh,hh,hh,kk,kk	TGCAGGCTGATGTTGGCCTGCGCCGCCTGCTGCGTGCGTGCCATGCTTGCCGTGTGGCCATCCCATGTCACCTGCGGGAGCGGAGTTGCAACACG	scaffold_2638	100	95	0	0	1	95		212708	212614	1e-46	188
scf392.1	IX	111.437	<lmxll>,(ll,lm),lm,ll,ll,lm,ll,lm,lm,lm,lm,ll,lm,lm,lm,lm,lm,ll,ll,lm,lm,ll,lm,lm,ll,ll,lm,ll,ll,ll,lm,lm	TGCAGGGCCTGGGCCTGCGCATCGACCGGCGCGGCTCCATGGAAATCATCAGCTGCGTGTCGGACACCCCAACCGAAGATGGCCTCCTGGCGCAA	scaffold_392	100	95	0	0	1	95		446	540	1e-46	188
scf455	IX	111.437	<efxeg>,(ee,ef,eg,fg),eg,ef,fg,ee,fg,ee,ee,ee,ee,fg,ee,ee,ee,ee,ee,fg,fg,ee,eg,ef,eg,eg,fg,fg,eg,fg,fg,fg,ee,ee	TGCAGGTTCTGGTTGTCTTCCTGCTTTCCATGCACAGCACATCGGTATCCAAGGGCTGAAACATTCCCAAAAAACAATCATACTATACATCTTGG	scaffold_455	97.89	95	2	0	1	95		55737	55643	6e-42	172
scf455.1	IX	111.437	<lmxll>,(ll,lm),ll,lm,lm,ll,lm,ll,ll,ll,ll,lm,ll,ll,ll,ll,ll,lm,lm,ll,ll,lm,ll,ll,lm,lm,ll,lm,lm,lm,ll,ll	TGCAGGGTACAAACAGCCAGAACTAGTCGGGGCTAAGCCAGTTTAAAAAGGTGAGTTTTCAAGACAGACGTAAATAGCTCAAATAACTCTGATTG	scaffold_455	100	95	0	0	1	95		55734	55828	1e-46	188
scf82.7	IX	111.437	<nnxnp>,(nn,np),np,nn,np,nn,np,nn,nn,nn,nn,np,nn,nn,--,nn,nn,np,np,nn,np,nn,np,np,np,np,np,np,np,np,nn,nn	TGCAGGTGACCTCTCTTTCCCGCATCTTCTGCTCCTCCCTTTGGCTGCTGGATGAGGATGGAGTTGCTTCTCACCTCGCAACTGGGTGAGCTGAG	scaffold_82	100	95	0	0	1	95		1186549	1186455	1e-46	188
scf13651	IX	122.768	<nnxnp>,(nn,np),nn,nn,np,nn,np,nn,nn,nn,np,nn,nn,nn,nn,nn,nn,np,np,np,np,nn,np,np,np,NP,np,np,np,np,nn,nn	TGCAGGCACCAAACAAAATGAATCTCGCGCCACCCCCACCTCCTCCCCCCGGAGAATTGCAATCGCGCCATTGGCCCAGCACGCTCGTCACGTGC	scaffold_13651	100	95	0	0	1	95		3400	3306	1e-46	188
scf17092	IX	122.768	<hkxhk>,(hh,hk,kk),kk,hk,hh,kk,hh,hk,kk,kk,hk,hk,kk,kk,kk,kk,kk,hh,hh,hk,hk,hk,hk,hh,hh,hh,hk,hh,hh,hh,kk,--	TGCAGGTCACTCCAAAGTCTCTTGCGGCGTCTCGTGAAGGAAGTTTGGTTCGGGCCTGCCGAGGAGTGCGGCTGCAAGAGGAGAGCCGGTTGGAG	scaffold_17092	100	95	0	0	1	95		722	816	1e-46	188
scf3797.1	IX	122.768	<lmxll>,(ll,lm),lm,ll,ll,lm,ll,ll,lm,lm,lm,ll,lm,lm,lm,lm,lm,ll,ll,lm,lm,ll,lm,ll,ll,ll,lm,ll,ll,ll,lm,lm	TGCAGGGGCGGGCCGTGAGCGGTGCGCCGTTTATTTTTCTGCCGGTTTATATTTCATGTCTAAAGCGGCAACCATGGCCACTCTCTGTCCCCGCG	scaffold_3797	100	95	0	0	1	95		21237	21331	1e-46	188
scf6911.1	IX	122.768	<hkxhk>,(hh,hk,kk),kk,hk,hh,kk,hh,hk,kk,--,hk,hk,kk,kk,kk,kk,kk,hh,hh,hk,hk,hk,hk,hh,hh,hh,HK,hh,hh,hh,kk,kk	TGCAGGCCAGAAGATTATCGGCCAGAAACATTTGTGTCGCAAGGTGGAAAAAGGGATTTTTAAAAATATAATAATTATAGCATTTCCTAGCCGGA	scaffold_6911	98.95	95	1	0	1	95		13058	12964	2e-44	180
scf6911.3	IX	122.768	<nnxnp>,(nn,np),nn,nn,np,nn,np,nn,nn,nn,np,nn,nn,nn,nn,nn,nn,np,np,np,np,nn,np,np,np,np,np,np,NP,np,nn,nn	TGCAGGAAGAGGCGGAATTTGAAGTTCGTGGTTTCCCGGTCGCAGCGCTCGCACCGGAACTTCCCGCTGCTCATCGTCACCACCTTTTTGCTGCA	scaffold_6911	100	95	0	0	1	95		2298	2204	1e-46	188
scf6911.4	IX	122.768	<nnxnp>,(nn,np),np,np,nn,np,nn,np,np,np,nn,np,np,np,np,np,np,nn,nn,nn,nn,np,nn,nn,nn,nn,nn,nn,nn,nn,NP,np	TGCAGGCCAACCTGGCAGACTTCTCGGACAACCAGTGGGTCACGTGCTTCCACGAGACGTCCGAGGTGCTGCTGGGAGACACGGCCGAGCGGCTG	scaffold_6911	98.95	95	1	0	1	95		2888	2982	2e-44	180
scf9231	IX	122.768	<lmxll>,(ll,lm),lm,ll,ll,lm,ll,ll,lm,lm,lm,ll,lm,lm,lm,lm,lm,ll,ll,lm,lm,ll,lm,ll,ll,ll,lm,ll,ll,ll,lm,lm	TGCAGGCCCATCATGGCCGGGTCGCACGACAGCTCCTCGTGCATCCTGTCTAGCGCCTTGATGTCCCGCAAGTGTCGCTCGGCCGTGTGGCCCAC	scaffold_9231	98.95	95	1	0	1	95		3556	3462	2e-44	180
scf993.4	IX	122.768	<nnxnp>,(nn,np),nn,nn,np,nn,np,nn,nn,nn,np,nn,nn,nn,nn,nn,nn,--,np,np,np,nn,np,np,np,np,np,np,np,np,nn,nn	TGCAGGAGCCCTGGCTACTGCTGGGCGCCATGTGCTTCTCGGCCGGGATCGGAGGCGGCTTTCAGTATGGCTTCAACGTGGCGGTCATCAGCGCC	scaffold_993	100	95	0	0	1	95		27533	27439	1e-46	188
scf18434	IX	122.961	<lmxll>,(ll,lm),lm,ll,ll,lm,ll,ll,lm,lm,lm,ll,lm,lm,lm,lm,lm,ll,ll,lm,lm,ll,lm,ll,ll,ll,lm,ll,ll,ll,lm,lm	TGCAGGACGGCACCGCCTACAGCTGCATGAGCGAGCTGGGAGAGATGGGTCTGGTGGAATTCAGAGATGTATGTACAGCTCGAGTCTAAAACGGT	scaffold_18434	98.95	95	1	0	1	95		1271	1365	2e-44	180
scf6911.2	IX	122.961	<lmxll>,(ll,lm),--,lm,lm,ll,lm,lm,ll,ll,ll,lm,--,ll,ll,ll,ll,lm,lm,ll,ll,lm,ll,LM,lm,lm,ll,lm,lm,lm,ll,ll	TGCAGGTCAGACCGGCCGCATCCCCAGAATGGTTTCTTGCTTCGTTGCAAATGTCACACTTGTGCAATAAAAAAGGACGCGAGCTCAACTAAATG	scaffold_6911	100	95	0	0	1	95		13055	13149	1e-46	188
scf6911	IX	123.155	<abxcd>,(ac,ad,bc,bd),bd,--,ac,bd,--,ad,bd,bd,bc,ad,bd,bd,bd,bd,bd,ac,ac,bc,bc,ad,--,ac,ac,--,--,ac,ac,ac,bd,bd	TGCAGGTGCAGCACGCGCTTCAACTGCCTCAGGCTCGGGGAAACCCTTTCCTTACTTAGTACCCAAGAATACTTTAAAATATCTCTAGCAGGCCA	scaffold_6911	95.79	95	3	1	1	95		2295	2388	8e-35	149
scf1780.1	IX	123.437	<lmxll>,(ll,lm),ll,lm,lm,ll,lm,lm,ll,ll,ll,lm,ll,ll,ll,ll,ll,lm,lm,ll,ll,lm,ll,lm,lm,lm,ll,lm,LM,lm,ll,ll	TGCAGGGTGCACAATCATGTAATTACTCGCTCGCTCGCCATTCACTCGCGCACCGTCCATGCAATCGCTCACTCACTTCTTCACGATACTCAACA	scaffold_1780	98.95	95	1	0	1	95		146343	146249	2e-44	180
scf1960.1	IX	123.437	<lmxll>,(ll,lm),lm,ll,ll,--,ll,ll,lm,lm,lm,ll,lm,lm,lm,lm,lm,ll,--,lm,lm,ll,lm,ll,ll,ll,lm,ll,ll,ll,lm,lm	TGCAGGAGATCGTAGAACTCCTGCGCGTTGTCCGTCGGGTCGCCCTCGCCGTACGTGGCCATGCAGAACACTGCCAGCGAGTTCTCGATCTTCGT	scaffold_1960	98.95	95	1	0	1	95		7018	6924	2e-44	180
scf24807	IX	123.437	<lmxll>,(ll,lm),ll,lm,lm,ll,--,lm,ll,ll,ll,--,ll,ll,ll,ll,ll,lm,LM,ll,ll,lm,ll,--,lm,--,ll,lm,lm,lm,ll,ll	TGCAGGTCCCTGCGCTTGTCTCCTCGCTGCCAGTTCTCTTTGGAGACGCCGAGCAGTTTGTGCAGCCTGCGCTTTTAATCTCTCGCGGCGCAGGT	scaffold_24807	97.89	95	2	0	1	95		24571	24665	6e-42	172
scf5752	IX	123.437	<lmxll>,(ll,lm),ll,lm,lm,ll,lm,lm,ll,ll,ll,lm,ll,ll,ll,ll,ll,lm,lm,ll,ll,lm,ll,lm,lm,lm,ll,lm,lm,lm,ll,ll	TGCAGGCGAATTACTTGGTCCACCGATGACTGTATCGGGATTGTACACACTGCACTGCATCTTGGAGCAAGAGACTTTAAGTGGTCAACCCGGCA	scaffold_5752	98.95	95	1	0	1	95		18919	18825	2e-44	180
20386	IX	123.719	<efxeg>,(ee,ef,eg,fg),fg,eg,ee,fg,--,eg,fg,fg,ef,--,fg,fg,fg,fg,fg,ee,ee,ef,ef,eg,ef,--,ee,ee,ef,ee,ee,ee,fg,fg	TGCAGGCTTTACAATCTCGGTTTATTCGGTGAGATTTATTTACGAGCGTAACATCCTGGTTCAATGTCTGGAGTTAACCCCGGGGTAAATCTAAC
scf3143	IX	125.191	<nnxnp>,(nn,np),nn,nn,np,nn,nn,nn,nn,nn,np,nn,nn,nn,nn,nn,nn,np,np,np,np,nn,np,np,np,np,np,np,np,np,nn,nn	TGCAGGTCCGGACGATTTGCTCCAGCAACCCGCGGCCACGATGCTCATGCTCCGTGCCGTCACGCGCTCCTTCTGTTCTCGCTCCGGCTCACTCT	scaffold_3143	98.95	95	1	0	1	95		30005	30099	2e-44	180
scf2736	IX	127.169	<lmxll>,(ll,lm),ll,lm,lm,ll,lm,lm,ll,ll,ll,lm,ll,ll,ll,LM,ll,lm,lm,ll,ll,lm,ll,lm,lm,lm,ll,lm,lm,lm,ll,ll	TGCAGGCTGCCTCAGTGATGAAAACTCGTGCCCCGCCACAAGAAGTCCCTGGGTTTGAGTCCCCACTCGGGATCCTTTCTGTGTGAAGTTTTGTA	scaffold_2736	97.89	95	2	0	1	95		11856	11762	6e-42	172
scf1169	XI	0	<lmxll>,(ll,lm),lm,lm,ll,LM,lm,ll,lm,ll,ll,LM,lm,lm,lm,ll,ll,lm,lm,lm,ll,lm,lm,ll,lm,ll,lm,ll,ll,lm,ll,ll	TGCAGGATTTCTAACCAGCGTGAAAGCTGGCCTGATGGTTGCTCAACTCGCAAGGCGCACTGTAGGGCGGCGTGATCGGAACACATCTCGAACCG	scaffold_1169	100	95	0	0	1	95		58355	58449	1e-46	188
scf3132.3	XI	0	<lmxll>,(ll,lm),ll,ll,lm,ll,ll,lm,ll,lm,--,ll,ll,ll,ll,--,--,ll,ll,ll,lm,ll,ll,--,ll,--,ll,lm,--,ll,lm,lm	TGCAGGGAGCGAGCGCACGGCATCAGCGGCGGCGTCAACGGCACGCGAGACATGCGCCGCACGTCCGCACGTCTGCACGTCTGCACGTGCGGCCC	scaffold_3132	96.84	95	3	0	1	95		498	404	1e-39	165
scf3132.4	XI	0	<lmxll>,(ll,lm),--,ll,lm,ll,ll,lm,ll,LM,lm,ll,ll,ll,ll,lm,lm,ll,ll,ll,lm,ll,ll,lm,ll,LM,ll,lm,lm,ll,lm,lm	TGCAGGTAGGCACGGCAGAGGCGCCGGTCCCAGTCGTCCGTGATGTGTCCCCCGTACATGATCTCGCCGATAAGGTAGCGAAGGTCCTCCCACGG	scaffold_3132	98.95	95	1	0	1	95		4464	4370	2e-44	180
scf3779	XI	0	<lmxll>,(ll,lm),ll,ll,lm,ll,--,lm,ll,lm,lm,ll,ll,ll,ll,lm,lm,ll,ll,ll,lm,ll,ll,--,ll,lm,ll,lm,lm,ll,lm,lm	TGCAGGCTGGGGAAATGACATCGAGTGGGTTCAGACTTATGAAGAGGGCCTTCTGAGAGCCAAAGAGACGTGCGTACACTCTGATGACTTCTACA	scaffold_3779	100	91	0	0	1	91		21366	21456	2e-44	180
scf6042.1	XI	0	<lmxll>,(ll,lm),ll,ll,lm,ll,ll,lm,ll,lm,lm,ll,ll,ll,ll,lm,lm,ll,ll,ll,lm,ll,ll,lm,ll,lm,ll,lm,lm,ll,lm,lm	TGCAGGTTCGCCTCCTGCTACCTGTTATATATTAATGTTTACTTTGGAAGATGGAAAGGGTGATTGGGCTCTGGGGCTCTTGCCTTGAGATGCCA	scaffold_6042	98.95	95	1	0	1	95		6409	6503	2e-44	180
scf826.1	XI	0	<lmxll>,(ll,lm),--,lm,ll,lm,lm,ll,lm,ll,ll,lm,lm,lm,lm,ll,ll,lm,lm,lm,ll,lm,lm,ll,lm,ll,lm,ll,ll,lm,ll,ll	TGCAGGAGAGACGAACGATCACTCAGCCAACACTCACTGCAGAAAACACTCACTCCAGCAAACACTCACACGTATACCTTTTGATAAATGTTTAA	scaffold_826	98.95	95	1	0	1	95		23892	23798	2e-44	180
scf9104	XI	0	<lmxll>,(ll,lm),lm,lm,ll,lm,lm,ll,lm,ll,ll,lm,lm,lm,lm,ll,ll,lm,lm,lm,ll,lm,lm,ll,lm,ll,lm,ll,ll,lm,ll,ll	TGCAGGGGTTGTTCTCTGATCCACGTGTTCCTCTTTTTGTCTCTCACTGTGACTGATTCATAGCAATGGAACATAACCCCCCAACCCGCACCTCC	scaffold_9104	100	95	0	0	1	95		9724	9818	1e-46	188
scf416	XI	3.45	<lmxll>,(ll,lm),ll,ll,lm,ll,ll,--,ll,lm,lm,ll,ll,ll,ll,lm,lm,ll,ll,lm,lm,ll,ll,lm,ll,lm,ll,lm,lm,ll,lm,lm	TGCAGGAGTGAGGGGCGTCCTGTTTCCCTCATCCAGCAAGCTGGCCCTCCCTGCTGGGCCGACTGAGGCATCGCACCTCTACCAGCCCAGCATCG	scaffold_416	96.84	95	3	0	1	95		223682	223588	1e-39	165
scf416.1	XI	3.45	<lmxll>,(ll,lm),lm,lm,ll,lm,lm,ll,LM,ll,ll,lm,lm,lm,lm,ll,ll,lm,lm,ll,ll,lm,lm,ll,lm,ll,lm,ll,ll,lm,ll,ll	TGCAGGTAGATGGGCATCACAATATTTCATCTACGCACGATCCATGAACCCCACCTGTTAAATGACTAAATTACAGGCACAAATACACCCGTCCT	scaffold_416	100	95	0	0	1	95		227560	227466	1e-46	188
scf416.2	XI	3.45	<lmxll>,(ll,lm),ll,ll,lm,ll,ll,lm,ll,lm,lm,ll,ll,ll,ll,lm,lm,ll,ll,lm,LM,ll,ll,lm,ll,lm,ll,--,lm,ll,lm,lm	TGCAGGGACATCAGCGGATGAGTGCTGTAGTCATGCGCTCTGCAGGCCCACGGGTGGTGTTCCTGTTTTAGCGCAATGCAGAGCAGGGGTGAGCT	scaffold_416	98.95	95	1	0	1	95		223679	223773	2e-44	180
scf1297	XI	6.899	<lmxll>,(ll,lm),ll,ll,lm,ll,ll,lm,ll,LM,lm,ll,ll,ll,ll,lm,lm,ll,ll,lm,lm,ll,ll,LM,lm,lm,ll,lm,lm,ll,lm,lm	TGCAGGTGCCTCCTGTCCTCAGCGTCTGTAATTAATTAGCGCCACCACTCATAGCCTATCTTGTTCATTGGAAATGCATTGTATATTGACTACCA	scaffold_1297	98.95	95	1	0	1	95		555745	555839	2e-44	180
scf1297.4	XI	13.799	<nnxnp>,(nn,np),nn,np,nn,nn,np,np,np,np,nn,np,nn,np,nn,nn,nn,nn,nn,np,np,nn,nn,nn,nn,nn,np,np,nn,nn,np,np	TGCAGGAATATCAGAGCTTAGGAAGGCACCAGAGTTGCACAGTTCATTGAAACATGCGGTTTAGACAGGTTTCCATTGCATTATAATCCATAACG	scaffold_1297	100	95	0	0	1	95		279763	279857	1e-46	188
scf6.4	XI	14.054	<lmxll>,(ll,lm),ll,ll,lm,ll,ll,lm,ll,lm,lm,ll,ll,ll,ll,lm,lm,ll,ll,lm,lm,ll,ll,lm,lm,ll,ll,ll,lm,ll,lm,lm	TGCAGGGTACTGTCCAGATAGTCTTCCTCATGCTCCGGGACATCTGCTGTCACCTCTTCCATTGCCTCGCGTTCACTGCGAGCTTCTTCTTCTGT	scaffold_6	100	95	0	0	1	95		48288	48382	1e-46	188
scf8.4	XI	17.504	<lmxll>,(ll,lm),lm,lm,ll,lm,lm,ll,lm,ll,ll,lm,LM,lm,lm,ll,ll,LM,ll,ll,ll,lm,lm,ll,ll,lm,--,lm,ll,--,ll,ll	TGCAGGGGACCTGTTTTATTGCACCGTAGGCAATAACTCATCCGGAGGTGCTGAGCGTTAGCAGTGGATCGGAGTTGTCGCTACGATAACCTGGC	scaffold_8	100	95	0	0	1	95		498706	498800	1e-46	188
scf1297.1	XI	20.954	<lmxll>,(ll,lm),ll,ll,--,ll,ll,lm,ll,lm,--,ll,ll,ll,ll,--,--,ll,ll,lm,lm,ll,ll,--,--,ll,ll,ll,--,ll,lm,lm	TGCAGGAGGATGAGCAGACACAATGTGTGGGCTGGACAGCCATCGGCACAGATTCCCACACAGATTCCCACACCACCGAACGCTCAGCGCAGTTC	scaffold_1297	98.95	95	0	1	1	95		211182	211089	6e-42	172
scf522	XI	20.954	<efxeg>,(ee,ef,eg,fg),eg,ee,--,eg,--,ef,ee,ef,fg,ee,eg,ee,eg,fg,fg,ee,eg,ef,ef,eg,eg,fg,fg,eg,eg,ee,fg,eg,ef,ef	TGCAGGGACCTGTTAAATAACGCGATCTAACCCAACAACCTTTATTATGAGTAATATTGGTCGCGAAAGCCTACGTGTTAAACTATTAATTTTCC	scaffold_522	100	95	0	0	1	95		83222	83316	1e-46	188
scf522.2	XI	20.954	<nnxnp>,(nn,np),np,nn,np,np,nn,nn,nn,nn,np,nn,np,nn,np,np,np,nn,np,nn,nn,np,np,np,np,np,np,nn,np,np,nn,nn	TGCAGGCCAGCTGCCGAGACTCTGACAACATCCACTTCAGCAAGCAGAGGGAGCTGCACCTGAATTATGAGCCCATCAACCTCACAGTGAGGGCA	scaffold_522	100	95	0	0	1	95		43788	43882	1e-46	188
scf6.1	XI	20.954	<hkxhk>,(hh,hk,kk),hk,hh,kk,hk,hh,hk,hh,hk,kk,hh,hk,hh,hk,--,kk,hh,hk,hk,hk,hk,hk,kk,kk,hk,hk,hh,kk,hk,hk,hk	TGCAGGAAGAGGCCGAGATCCTGCAAACGTACCAGACCCTTCTAGCACAAGCTCGCACACCCTGACACAAGGTAAATGAACAAAGACCTTCAATG	scaffold_6	98.95	95	1	0	1	95		48291	48197	2e-44	180
scf8.2	XI	20.954	<lmxll>,(ll,lm),lm,lm,ll,lm,lm,ll,lm,ll,ll,lm,lm,lm,lm,ll,ll,LM,lm,ll,ll,lm,lm,ll,ll,lm,lm,lm,ll,lm,ll,ll	TGCAGGGCCGCAGAACGTTTGCAGAGAAAAGATTGTGCCTGCCCCTGTCCCCTGAGTTATCCTGCCATCCACCCACGAATCATCACGCTGCTAAC	scaffold_8	100	95	0	0	1	95		534802	534708	1e-46	188
scf522.1	XI	22.742	<lmxll>,(ll,lm),ll,ll,lm,ll,ll,lm,ll,lm,lm,ll,ll,ll,ll,lm,lm,ll,ll,lm,lm,ll,ll,lm,LM,ll,ll,ll,lm,ll,lm,lm	TGCAGGCAGATTGTCTGTTGTAGACCGGGTGCAGAGACTCGCACACTGTCTGTGGAGCGGTCGGTGCTTTTGCTGCGTTTTTTGCGAGCAGTTTA	scaffold_522	100	95	0	0	1	95		121574	121480	1e-46	188
scf8	XI	24.531	<hkxhk>,(hh,hk,kk),kk,hk,HK,kk,hk,hh,hk,hh,hk,hk,kk,hk,kk,hk,hk,hk,kk,hh,hh,kk,kk,hh,hk,kk,kk,hk,hk,hk,hh,hh	TGCAGGATGTGTCCCCCTCACCTATTGCTTCTCAACTTGCTTTAGTCTTGCTTGCTTCTACGACATTTTATAACACGTTGGCAGCACTGCCGTCG	scaffold_8	100	95	0	0	1	95		577603	577509	1e-46	188
scf8.3	XI	24.531	<lmxll>,(ll,lm),lm,lm,ll,lm,lm,ll,lm,ll,ll,lm,lm,lm,lm,ll,ll,lm,lm,ll,ll,LM,lm,ll,ll,lm,lm,lm,ll,lm,ll,ll	TGCAGGCGGAGATGGACAAGAAGTGCAAGCAGGTGAAGGAGAAGTGCAAGGAGGAATTTTTGGAGGAGATTAAGAAGCTTGCCACGCAGCACAAG	scaffold_8	100	95	0	0	1	95		541391	541297	1e-46	188
scf1411.1	XI	25.394	<nnxnp>,(nn,np),nn,np,nn,nn,np,np,np,np,nn,np,nn,np,nn,nn,nn,np,--,np,np,nn,nn,np,nn,nn,nn,np,nn,np,np,np	TGCAGGATCAGATGGACGAGAGGGAGGAGGAACCAGCAAAGTCAGAAGGTCTTGGGTGTGGTGTGTGCGGTGGTTCGGGCTGTATGGTGCACACC	scaffold_1411	100	95	0	0	1	95		51645	51551	1e-46	188
scf48.8	XI	25.394	<nnxnp>,(nn,np),np,nn,np,np,nn,nn,nn,nn,np,nn,np,nn,np,np,np,nn,np,nn,nn,np,np,nn,np,np,np,nn,np,nn,nn,nn	TGCAGGAAAATGTGGTGGTGCCTTTAGGGAGGAAGTACAAGTAGTTTTAAAAAAACAACTGGTGTTTGTTTAAAGGACAGCTTCTTACATCTCAT	scaffold_48	98.96	96	0	1	1	95		142450	142355	5e-30	133
scf8.5	XI	25.394	<nnxnp>,(nn,np),NP,nn,np,np,nn,nn,nn,nn,np,nn,np,nn,np,np,np,nn,NP,nn,nn,NP,np,nn,np,NP,np,nn,--,nn,nn,nn	TGCAGGACCTCCATATTCAACCATTCATAGGCCGACATGAAAAGCGTAAACGTTCATAATTTTTACTCCCAAATTATGGGGAGCCCAAATTGAGA	scaffold_8	100	95	0	0	1	95		643929	643835	1e-46	188
scf8.6	XI	25.394	<nnxnp>,(nn,np),np,nn,np,np,nn,nn,nn,nn,np,nn,np,nn,np,np,np,nn,np,nn,nn,np,np,nn,np,np,np,nn,np,nn,nn,nn	TGCAGGGTGCTGAATCAAAATATAACATGCTATGTTCAAAATCTCAATTTCTTAGATACATTTTTGTAATGATATTAAAGTCAATGGAAAGGGGG	scaffold_8	100	95	0	0	1	95		643926	644020	1e-46	188
scf1411	XI	26.256	<lmxll>,(ll,lm),ll,ll,lm,ll,ll,lm,ll,lm,lm,ll,ll,ll,ll,lm,lm,ll,ll,lm,lm,ll,ll,lm,lm,ll,ll,ll,LM,ll,lm,ll	TGCAGGAGTTCCAGACCATGGAGGCAGCAGAAGAAACCTACACCAGGCTACTGCCACCCTGCAGAAAGGAGGAAGTGAGAGGTTTCCATGTAGGG	scaffold_1411	100	95	0	0	1	95		51642	51736	1e-46	188
scf8.1	XI	26.256	<hkxhk>,(hh,hk,kk),kk,hk,hk,kk,hk,hh,hk,hh,hk,hk,kk,hk,kk,hk,hk,hk,kk,hh,hh,kk,kk,hh,hk,kk,kk,hk,hk,hk,hh,hk	TGCAGGGCCATGAGGTGACAAGTACGTGGCAGTACAGCAAGCTTCAGACGAATCTGAATAGATTATTAAGTGCAATTACCAAGTCTGTGTGGGTT	scaffold_8	100	95	0	0	1	95		66429	66523	1e-46	188
scf2775	XI	28.831	<nnxnp>,(nn,np),nn,np,nn,nn,np,np,np,np,nn,np,nn,np,nn,np,nn,np,nn,np,np,nn,nn,np,nn,nn,nn,np,nn,np,np,np	TGCAGGACTTCTCGTTCCACGTTACATACCGCAAGGGCTCTCGCCATACGAACGCCGATGCCCTGTCACGATTACCATGGTTGTGCATGTTTTTC	scaffold_2775	100	95	0	0	1	95		20951	21045	1e-46	188
scf2775.1	XI	28.831	<nnxnp>,(nn,np),nn,np,nn,nn,np,np,np,np,nn,np,nn,np,nn,np,--,np,nn,np,np,nn,nn,np,--,nn,nn,np,nn,np,np,np	TGCAGGATCTCTAACCAGCATGATAATTGGCCTGATGGCTGATCCACACGCAGTGCATATTGGAGCGCTGCATGATCGAAGCGCACCTCAAATCG	scaffold_2775	100	95	0	0	1	95		20954	20860	1e-46	188
scf439.2	XI	28.831	<nnxnp>,(nn,np),nn,np,nn,nn,np,np,np,np,nn,np,nn,np,nn,np,nn,np,nn,np,np,nn,nn,np,nn,nn,nn,np,nn,np,np,np	TGCAGGTACAAATGCAGGTTAATCCTGAAATAGTCGTGGGTTTGATCCTGACCCTGACACCTGTATATTTGGAGTTTGCACGTACTCCCTGTGGT	scaffold_439	100	95	0	0	1	95		504828	504922	1e-46	188
scf464	XI	28.831	<nnxnp>,(nn,np),np,nn,np,np,nn,nn,nn,nn,np,nn,np,nn,np,nn,np,nn,np,nn,nn,np,np,nn,np,np,NP,nn,np,nn,nn,nn	TGCAGGAGGCCACAGTCATGGGTATCAGAGACGCACGTCTGGAAAAGCGGTGCACTGCGGCAATGATGATATATCACGGCCAATGAAGAGTAACG	scaffold_464	100	95	0	0	1	95		31838	31744	1e-46	188
scf71.23	XI	28.831	<nnxnp>,(nn,np),np,nn,np,np,nn,nn,nn,nn,np,nn,--,nn,np,nn,np,nn,np,nn,nn,np,np,nn,np,np,np,nn,np,nn,nn,nn	TGCAGGCGATTATATCGAAGAGCCTTCGTGCTGTGGCTCTGCCCTCACTCTCGCCGCGCATCCGCCCACGCAGCCGCTCCACACACAAACAAATC	scaffold_71	98.95	95	1	0	1	95		2910707	2910613	2e-44	180
scf439.1	XI	31.407	<nnxnp>,(nn,np),nn,np,nn,nn,np,np,np,np,nn,np,nn,np,nn,np,nn,np,nn,np,np,nn,nn,np,nn,nn,nn,NP,nn,np,nn,np	TGCAGGACATTGTGTGAACCCGGTGTGGATGGGATGAAACGGTCGGTGTGGTAGAGTGCTTGACCATCGGTGGACGACCTCAATGAGTGAAGCTC	scaffold_439	100	95	0	0	1	95		483962	484056	1e-46	188
scf24833.1	XI	33.982	<nnxnp>,(nn,np),np,nn,np,np,nn,nn,nn,nn,np,nn,np,nn,np,nn,np,nn,np,nn,nn,np,np,nn,np,np,np,nn,np,nn,nn,nn	TGCAGGAGCTGGGCCTCGCACCCAGCGCCGCCATCATTGTATTGCCTGTGCGTCCACGGACACCGTCGGGCGCACGCACCCGCCTCCACCAATGC	scaffold_24833	100	95	0	0	1	95		75172	75266	1e-46	188
scf48.2	XI	37.089	<lmxll>,(ll,lm),ll,ll,lm,lm,ll,lm,ll,lm,lm,ll,ll,ll,ll,ll,lm,ll,ll,lm,LM,ll,ll,lm,lm,ll,ll,ll,lm,ll,lm,ll	TGCAGGTCAATGACAGCACAGCAAGTAGGCGGTAGACGTTCATGAGGATATTTTTGAGCGTCATCCTTTTTCTCTCGATTTTCTCTGGGCACTCA	scaffold_48	98.95	95	1	0	1	95		208425	208519	2e-44	180
scf11954	XI	42.311	<lmxll>,(ll,lm),ll,ll,lm,lm,ll,lm,ll,lm,lm,ll,ll,ll,ll,ll,lm,ll,ll,lm,lm,ll,--,lm,lm,ll,ll,lm,lm,ll,LM,ll	TGCAGGAATGGCTCCTGACTCGCACTCAGGACCATCTGCGCTCCCACCAGCGTGAGCCCACGGGTCGCTCTGTTGGACGGTGTGAGCAGGACCGA	scaffold_11954	97.89	95	2	0	1	95		1080	986	6e-42	172
scf12132	XI	42.311	<lmxll>,(ll,lm),lm,lm,ll,ll,lm,ll,lm,ll,ll,lm,lm,lm,lm,LM,ll,lm,LM,ll,ll,lm,lm,ll,ll,lm,lm,ll,ll,LM,ll,lm	TGCAGGCCGACTCCTTTGTCGTCAACAACAACAACAAGGTGATGGCGTCTCTCTTCCACGCAGATTCTGAAACGATCCATACACACAAGAGATGT	scaffold_12132	100	95	0	0	1	95		4682	4776	1e-46	188
scf12132.1	XI	42.311	<lmxll>,(ll,lm),lm,lm,ll,ll,lm,ll,lm,ll,ll,lm,lm,lm,lm,lm,ll,lm,lm,ll,ll,lm,lm,ll,ll,lm,lm,ll,ll,lm,ll,lm	TGCAGGCTGTTGATGGCCTCCATTTGGGCGTTGTAGAGCAGGGCCTTGAGGTCGGCTCCCGTGAACCCCGCCGTCTGCTCAGCCACCGGCTGCAG	scaffold_12132	100	95	0	0	1	95		4685	4591	1e-46	188
scf12306	XI	42.311	<lmxll>,(ll,lm),LM,lm,ll,ll,lm,ll,lm,ll,ll,lm,lm,lm,lm,lm,ll,lm,lm,ll,ll,lm,lm,ll,ll,lm,lm,ll,ll,lm,ll,lm	TGCAGGAATAGTTCAGGAGGACTCAATTGTTTTGGCACGCCACGCATCGCCTTATTTGGTCCTCAACCTGTGCATATGATTATAGGAATATCACT	scaffold_12306	100	95	0	0	1	95		14463	14369	1e-46	188
scf12989	XI	42.311	<lmxll>,(ll,lm),ll,ll,lm,lm,ll,lm,ll,lm,lm,ll,ll,ll,ll,ll,lm,ll,ll,lm,lm,ll,ll,lm,lm,ll,ll,lm,lm,ll,lm,--	TGCAGGGACCTGTTTCTAAAAGCCACGCACATTGTTATTGACGAATACGTTGAGTGTTGCGCTAATTGGATATTTCTACACTGAAGCTGATTGCT	scaffold_12989	100	95	0	0	1	95		1174	1268	1e-46	188
scf1926	XI	42.311	<lmxll>,(ll,lm),lm,lm,ll,ll,lm,ll,lm,ll,ll,lm,lm,lm,lm,lm,ll,lm,lm,ll,ll,lm,lm,ll,ll,lm,lm,ll,ll,lm,ll,lm	TGCAGGGACCTGTTACATGTTTTAACGGTTGAGAATCAAAGGGGTGCGAGGCTGCGGTAAAGGTTACGACGCACTGGTCTACAGGAGAAAAAGTG	scaffold_1926	98.95	95	1	0	1	95		4645	4739	2e-44	180
scf1932	XI	42.311	<hkxhk>,(hh,hk,kk),kk,hk,hk,hk,kk,hh,hk,hk,hk,hk,kk,hk,kk,hk,hk,hk,kk,hh,hk,kk,kk,hh,hk,kk,kk,hh,hk,hk,hh,hk	TGCAGGTGCACGCGTGTTTGCGCCGCCGCTATCGCGTTGGCCATAGTGCGTGCGCGGGTTAGGGTATAAACCACCCGCAGAAGCGCGCGCGTTCG	scaffold_1932	100	95	0	0	1	95		48154	48248	1e-46	188
scf24833	XI	42.311	<lmxll>,(ll,lm),lm,lm,ll,ll,lm,--,lm,ll,ll,lm,lm,lm,lm,lm,ll,lm,lm,ll,ll,lm,lm,ll,ll,lm,lm,ll,ll,lm,ll,lm	TGCAGGGCAGCACAAGGTGGCGGCCAGCATTTTGTAGCAGCCGGATATCCGGTTATGTATGTTGAATTGCTTTCGCACCGTACATAGCCAACCAT	scaffold_24833	98.95	95	1	0	1	95		63833	63927	2e-44	180
scf2552	XI	42.311	<lmxll>,(ll,lm),lm,lm,ll,ll,lm,ll,lm,ll,ll,lm,lm,lm,lm,lm,ll,lm,lm,ll,--,lm,lm,ll,ll,lm,lm,ll,ll,lm,ll,lm	TGCAGGATTAACCACGGCGGCCGCAGGAATCGAACCGTGAACCTTTGCAATAAGTGGCAAACGCACTGCCCCTAGGCCAGTGGTTACAACCTTTT	scaffold_2552	98.95	95	1	0	1	95		14282	14188	2e-44	180
scf270.10	XI	42.311	<lmxll>,(ll,lm),lm,lm,ll,ll,lm,ll,lm,ll,ll,lm,lm,lm,lm,lm,ll,lm,lm,ll,ll,lm,lm,ll,ll,lm,lm,ll,ll,lm,ll,lm	TGCAGGCAGCGAGCCATCGACGCTTCACGTAGCCTCAAGGTGCACCTAGCCCGGCACAAGCGCCGTGATGATGTCACGGTGGTTGTTGTGTATTT	scaffold_270	100	95	0	0	1	95		901849	901943	1e-46	188
scf4302	XI	42.311	<lmxll>,(ll,lm),lm,lm,ll,ll,lm,ll,lm,ll,ll,lm,lm,lm,lm,lm,ll,lm,lm,ll,ll,lm,lm,ll,ll,lm,lm,ll,ll,lm,ll,lm	TGCAGGCCTTCAAACGAAGCGACCGGGGTGATACTGCGTTGGCAGAGATGCACGAGCACTGGAAGCAAAAGAAAAACTCAACACATTCATCAATA	scaffold_4302	100	95	0	0	1	95		8453	8547	1e-46	188
scf48.3	XI	42.311	<lmxll>,(ll,lm),ll,ll,lm,lm,ll,lm,ll,lm,lm,ll,ll,--,ll,ll,lm,ll,ll,lm,lm,ll,ll,LM,lm,ll,ll,LM,lm,ll,lm,ll	TGCAGGCGCGTATTTCCCTTACAGAGGTTGGCGCGGAACAAAAGATACGGCAGCGGTATAAATATGCGTGTACCTGCGCTAAAGAGAAAGAAGCA	scaffold_48	100	95	0	0	1	95		523761	523855	1e-46	188
scf48.5	XI	42.311	<lmxll>,(ll,lm),ll,ll,lm,lm,ll,lm,ll,lm,lm,ll,ll,ll,ll,ll,lm,ll,ll,lm,lm,ll,ll,lm,lm,ll,ll,lm,lm,ll,lm,ll	TGCAGGGCAGCACAAGGTGGTAGCCTGCAGCATTTTTCAGAAGCCGGATATCCGGTTATCCCGATTACCGACTTTCCCCAAATTTCAGGGGGAGC	scaffold_48	96.84	95	3	0	1	95		492985	492891	1e-39	165
scf145.1	XI	47.614	<lmxll>,(ll,lm),lm,lm,ll,ll,lm,ll,lm,ll,ll,lm,lm,lm,lm,lm,ll,lm,lm,ll,ll,ll,lm,ll,ll,lm,ll,ll,ll,lm,ll,lm	TGCAGGAAGAGGTAAACGCGGCCGACCTCACGCAGCTTCCCGTCCGAGCCGCGGTCCATGAAGAGCGGCGCTCCCACCAGCACGTCTTCCAGCCT	scaffold_145	100	95	0	0	1	95		242474	242568	1e-46	188
scf145.2	XI	47.614	<nnxnp>,(nn,np),np,nn,np,np,np,nn,nn,np,nn,nn,np,nn,np,nn,np,nn,np,nn,np,np,np,nn,np,np,np,nn,np,nn,nn,nn	TGCAGGAGCGAACACTGTCCTTCCGTGAGCCGCAGCGATTCACGGGCGAAGAGATGTACTCGCGTTTTGGCAGCGCACTCGCCCCGCTGGGCGAC	scaffold_145	100	95	0	0	1	95		242477	242383	1e-46	188
scf145.4	XI	47.614	<nnxnp>,(nn,np),np,nn,np,np,np,nn,nn,np,nn,nn,np,nn,np,nn,np,nn,np,nn,np,np,np,nn,np,np,np,nn,np,nn,nn,nn	TGCAGGCAGAATGTACATACGGTGGATGGGAGTTCCCGACAGAGAGAAGCACTTGATTGCCCTAGCCCAGAATATTACATGTACTCCATATCGTA	scaffold_145	100	95	0	0	1	95		142128	142034	1e-46	188
scf211	XI	47.614	<hkxhk>,(hh,hk,kk),--,hk,hk,hk,hh,kk,hk,hk,kk,hk,hh,hk,hh,hk,hk,hk,hh,kk,hk,hk,hh,kk,hk,hh,HK,kk,hk,hk,kk,hk	TGCAGGAAAACGGACGAAGAGAAATGGGTTGATAAACCCGCCATCAAAACAAAATGTTACTGGTTCAGTCAACTATCATTGTCATCAACAGCAGC	scaffold_211	100	95	0	0	1	95		242157	242251	1e-46	188
scf72	XI	48.476	<lmxll>,(ll,lm),lm,lm,ll,ll,lm,--,lm,ll,ll,lm,lm,lm,lm,lm,ll,lm,lm,ll,ll,ll,lm,ll,ll,lm,ll,ll,ll,lm,ll,lm	TGCAGGTTGCAATAGACCTGTCACGAACAAGATAGGATTACCGAGCACAAGGGAGCAAGCAACATAAGCTGGGATAAATTCATGCTGAGCTTTAA	scaffold_72	100	95	0	0	1	95		346701	346795	1e-46	188
scf145	XI	49.339	<efxeg>,(ee,ef,eg,fg),fg,ef,eg,eg,fg,ee,ef,eg,ee,ef,fg,ef,fg,ef,eg,ef,fg,ee,eg,eg,fg,ee,eg,fg,ee,ee,eg,ef,ee,ef	TGCAGGAGTCCATCTCAGTTGGTTAACCCATAACACCTTGGACTGTCCCGTGACCTCCTGCCAGCAGTGAGCGTTCGGCACTTCACGTGGCCTCA	scaffold_145	97.89	95	2	0	1	95		221422	221328	6e-42	172
scf211.1	XI	51.063	<nnxnp>,(nn,np),np,nn,np,np,--,nn,nn,np,nn,nn,np,nn,np,nn,np,nn,np,nn,np,np,np,nn,np,np,np,nn,np,nn,nn,nn	TGCAGGTGCTGGAGTCTGTGGTTCTCAGTGAAGACACCACCACATCCTCGAGCCGTATTTTTGTCAAGATCCTTTTTCAAGAGCTTTGCGAATAC	scaffold_211	100	95	0	0	1	95		242160	242066	1e-46	188
scf211.2	XI	51.063	<nnxnp>,(nn,np),np,nn,np,np,np,nn,nn,np,nn,nn,np,nn,np,nn,np,nn,np,nn,np,np,np,nn,np,np,np,nn,np,nn,nn,nn	TGCAGGGACCTGTTTCTTGGTGCAGTCAAGTTTGTATACTATTCCACTCGGGCAACTGACAAACCAGACGGACGGGATTAAAGATTTTCTTTGGT	scaffold_211	100	95	0	0	1	95		299121	299027	1e-46	188
scf593	XI	51.063	<hkxhk>,(hh,hk,kk),kk,hk,hk,hk,kk,hh,hk,hk,hh,hk,kk,hk,kk,hk,hk,hk,kk,hh,hk,hk,kk,hh,hk,kk,hk,hh,hk,hk,hh,hk	TGCAGGAGGCTTTTGCGATGCGGTGGGACGTGGACACGGGTGTGACCGGCCATCGTCGTGTGCACGATTCTCATGATTTTATGGTTGTCTGTAAT	scaffold_593	97.89	95	2	0	1	95		159824	159918	6e-42	172
scf145.3	XI	53.654	<nnxnp>,(nn,np),--,nn,np,np,--,nn,nn,np,nn,nn,--,nn,--,nn,np,nn,--,nn,np,np,--,nn,np,--,np,nn,np,nn,nn,nn	TGCAGGGTTTTACTGCCTGTATTGGTTTCCTCAGGAAATCAACCTCAGACACTTTATTACATCTTTAGCTGTGTTGCCACCCTGAGGCACAGCGA	scaffold_145	100	95	0	0	1	95		142125	142219	1e-46	188
scf72.1	XI	54.751	<lmxll>,(ll,lm),ll,ll,lm,lm,ll,lm,ll,lm,lm,ll,lm,ll,ll,ll,lm,ll,ll,lm,lm,lm,ll,LM,lm,ll,lm,lm,lm,ll,lm,ll	TGCAGGCCATTCTCTAACACGGGGTGATGCACTGCTCTGTGAGCATTCAGAGTGAACTCTTCACCTCACGAAAGCGTGCGAGTAGCACAATCGGA	scaffold_72	97.89	95	2	0	1	95		133421	133327	6e-42	172
scf72.2	XI	54.751	<lmxll>,(ll,lm),lm,lm,ll,ll,lm,ll,lm,ll,ll,lm,ll,lm,lm,lm,ll,lm,lm,ll,ll,ll,lm,ll,ll,lm,ll,ll,ll,lm,ll,lm	TGCAGGTCAGGAACCACGAAGGAGCAAGCGTGCAGCAGCTTGTCCGGGTCGGTGGCCTTCAGCCAGTCGCTGGAGCCCTCCTCCTGCATCTCCAC	scaffold_72	98.95	95	1	0	1	95		105417	105511	2e-44	180
scf72.3	XI	54.751	<lmxll>,(ll,lm),lm,lm,ll,ll,lm,ll,lm,ll,ll,lm,ll,lm,lm,lm,ll,lm,lm,ll,ll,ll,lm,ll,ll,lm,ll,ll,ll,lm,ll,lm	TGCAGGTGGGTGTTAGTCTACCAGTGGGCATGCTATGTTGCTCCATGGCTTCACAATTAAAGTACAAGTAATTTTATCAAATTGGGAAAATTTTG	scaffold_72	100	95	0	0	1	95		257999	258093	1e-46	188
scf72.4	XI	54.751	<lmxll>,(ll,lm),ll,ll,lm,lm,ll,lm,ll,lm,lm,ll,lm,ll,ll,ll,lm,ll,ll,lm,lm,lm,ll,lm,lm,ll,lm,lm,lm,ll,--,ll	TGCAGGTGCCATGGTTGACTCACTGAGACGACTGACAGATGCCACACATGTGCCCCCTACTGTGCCAACTCCACAACAACTGCTATTCGCCACAA	scaffold_72	98.92	93	1	0	1	93		128888	128980	4e-43	176
scf3434	XI	62.029	<nnxnp>,(nn,np),nn,nn,np,np,np,nn,--,np,nn,nn,nn,nn,np,nn,np,nn,np,nn,np,np,nn,nn,np,np,--,nn,np,nn,nn,nn	TGCAGGTAAGGCACCTGCAGCTAGGCAGGTAAGTGGTTTGCCAGGTGTAGACACGTTGTGGTAACCACTAATCCCACGGACTCCTCGGCGTTGCA	scaffold_3434	100	95	0	0	1	95		790	884	1e-46	188
scf593.1	XI	62.421	<lmxll>,(ll,lm),lm,lm,ll,ll,lm,ll,lm,ll,ll,lm,ll,lm,lm,lm,ll,ll,ll,ll,ll,ll,lm,ll,ll,--,ll,ll,ll,lm,ll,--	TGCAGGGCCAGGCCGGTGTCCCGACAGATCTGACAAACTCCCTTAACCTGGTATTGTGGCTTCAATCCTGACCCCCGACGGTCTGCTTATCTGGA	scaffold_593	100	95	0	0	1	95		159827	159733	1e-46	188
scf24800	XI	74.371	<lmxll>,(ll,lm),lm,ll,lm,lm,lm,lm,ll,lm,lm,ll,lm,ll,ll,ll,lm,ll,lm,lm,lm,lm,ll,lm,lm,ll,lm,lm,lm,ll,lm,ll	TGCAGGCTTCTCTAGTTAATACGTCCACTGGATTTACCATGAAATATCCATCATCTGTTTCACAGTGGATGCTAAAGATGTTGTGATGTCATTTG	scaffold_24800	100	95	0	0	1	95		48232	48138	1e-46	188
scf2947	XI	78.059	<lmxll>,(ll,lm),lm,ll,lm,lm,lm,lm,ll,lm,ll,ll,lm,ll,ll,ll,lm,ll,lm,lm,lm,lm,ll,lm,lm,ll,lm,lm,lm,ll,lm,ll	TGCAGGTGCTCACTCTCGGGAGGGAGTTCAGCAGGTCAGCGCGCGCGCGAGAGCCACTAACAGCACTCGCCCCATACGGTCTGCTAAGGCTATAT	scaffold_2947	98.95	95	1	0	1	95		14071	14165	2e-44	180
scf323.5	XI	84.912	<nnxnp>,(nn,np),nn,nn,np,np,np,np,np,np,nn,np,nn,nn,np,np,np,nn,np,np,np,np,nn,nn,np,np,np,nn,np,nn,np,nn	TGCAGGCTGGCACGCATGCACGCGCACACACACACCTGTTTACATACTGGTTTAAATACTCGTACAATAATAACCCTAAACCTATTTTGATGTTC	scaffold_323	100	95	0	0	1	95		375202	375296	1e-46	188
scf98.4	XI	85.258	<hkxhk>,(hh,hk,kk),hk,kk,hh,hh,hh,hk,hk,hh,kk,hk,hk,kk,hk,hk,hh,kk,hh,hh,hh,hh,hk,hk,hh,hk,hh,hk,hh,kk,hh,kk	TGCAGGCTGTTTGAGCGGCAGCCTTTCGAACTGATCGAACTTATTAGCTACAGCGGTTCCGACCTATTAATAAACTCCGCGTTCAAATCCAATGG	scaffold_98	100	95	0	0	1	95		75004	74910	1e-46	188
scf5648	XI	86.873	<lmxll>,(ll,lm),lm,ll,lm,lm,lm,ll,ll,lm,ll,ll,lm,ll,ll,ll,lm,ll,lm,lm,lm,lm,ll,lm,LM,ll,lm,lm,lm,ll,lm,ll	TGCAGGTTGCTAGTACTGTACGCCTATTTATTAGAGCATTATAGCTCAAAATTGGTGAAAGTGTAAAGTACCATTTTAAAAAGATAACAGGAGAC	scaffold_5648	98.95	95	1	0	1	95		12268	12174	2e-44	180
scf5648.1	XI	86.873	<lmxll>,(ll,lm),lm,ll,lm,lm,lm,ll,ll,lm,ll,ll,lm,ll,ll,ll,lm,ll,lm,lm,LM,lm,ll,lm,lm,ll,lm,lm,lm,ll,lm,ll	TGCAGGTCCCGAGTCATCAAGCAATACAGTACACGTGTGTTCTTGCATTGCTCCATGGCTCGGCCTTTCTCTTGCATTCCCTGTACTATATGTCG	scaffold_5648	100	95	0	0	1	95		12265	12359	1e-46	188
11881	XI	88.696	<efxeg>,(ee,ef,eg,fg),ef,ee,fg,fg,fg,eg,eg,fg,ee,eg,ef,ee,--,eg,fg,ee,fg,fg,fg,fg,ef,ef,fg,eg,fg,ef,fg,ee,fg,ee	TGCAGGGCCAGTGGTGGAAATTCCATGTTCCTATGGTGGGGGTGAGTTTATCCAAAAGACAACACCTGTTTACTTCCTCACAGAGTGGTACTCGC
scf1207	XI	88.696	<hkxhk>,(hh,hk,kk),hk,kk,hh,hh,hh,hk,hk,hh,kk,hk,hk,kk,hk,hk,hh,kk,hh,hh,hh,hh,hk,hk,hh,hk,hh,hk,hh,kk,hh,kk	TGCAGGATCACTGTTTCTACACTGCACCACACGCAGCCCGTAAGTACACTGAGCACACTCTGCTAGATGCAGCCCATATAATTCACCCTGCACTC	scaffold_1207	100	95	0	0	1	95		16579	16485	1e-46	188
scf16132	XI	88.696	<lmxll>,(ll,lm),lm,ll,lm,lm,lm,ll,ll,lm,ll,ll,lm,ll,ll,ll,lm,ll,lm,lm,lm,lm,lm,lm,lm,ll,lm,lm,lm,ll,lm,ll	TGCAGGAGGTTACGGGGCAGACCCAGGTGCCGTGGGCTGACCGGGAAGACTGTGCCCCCCACTGCACAAACTTGTTGCGTTTTACCCACCCGGCG	scaffold_16132	98.95	95	1	0	1	95		896	990	2e-44	180
scf323.2	XI	88.696	<lmxll>,(ll,lm),lm,ll,lm,lm,lm,ll,ll,lm,ll,ll,lm,ll,ll,ll,lm,ll,lm,lm,lm,lm,lm,lm,lm,ll,lm,lm,lm,ll,lm,ll	TGCAGGTACCGCATGCACACACAAGAAAATGCAAGCGCCTCCTATTAGCACAGTTAACTCCGTACGGTGCGAAAGTTCAACATGCACACAAGCCA	scaffold_323	98.95	95	1	0	1	95		273658	273564	2e-44	180
scf323.3	XI	88.696	<nnxnp>,(nn,np),nn,nn,NP,np,np,np,np,np,nn,np,nn,nn,np,np,np,nn,np,np,np,np,nn,nn,np,np,np,nn,np,nn,np,nn	TGCAGGGTGGACGTGCATCGCAAGGAAATGCTGGGCTCGGCCGAGAAGCCCGTGACGATCCAGGCGAGCCCTGACGGACGCTCGGCCGCTTGTCG	scaffold_323	100	95	0	0	1	95		273655	273749	1e-46	188
scf5912	XI	88.696	<lmxll>,(ll,lm),lm,ll,lm,lm,lm,ll,ll,lm,ll,ll,lm,ll,ll,ll,LM,ll,lm,lm,lm,lm,lm,lm,LM,ll,lm,lm,lm,ll,lm,ll	TGCAGGTGCCATGGGTTGGCTGACTGAGATGACCGGTAGATGCACCACCAGCTGTACCCCCTACTGTGCCAATTTGCTGCATTTTATCCGCTCGG	scaffold_5912	95.56	90	4	0	2	91		11111	11022	3e-34	147
scf6113	XI	88.696	<lmxll>,(ll,lm),lm,ll,lm,lm,lm,ll,ll,lm,ll,ll,lm,ll,ll,ll,lm,ll,lm,lm,LM,lm,lm,lm,lm,ll,lm,lm,lm,ll,lm,ll	TGCAGGACCTCTACGGTTAACCAAATGTCCAATTTGGATTATTGTTTTCAGGATCAATACTCAATCCCGAGAGCGATGGAATCGATTATCAAATC	scaffold_6113	100	95	0	0	1	95		977	1071	1e-46	188
scf98.2	XI	88.696	<hkxhk>,(hh,hk,kk),hk,kk,hh,hh,hh,hk,hk,hh,kk,hk,hk,kk,hk,hk,hh,kk,hh,hh,hh,hh,hk,hk,hh,hk,--,hk,hh,--,hh,kk	TGCAGGTGCCGCTGCTGCCTCCCTCCCACGCCTGCGTGCGCGCCGTCGCTGTGCACCCCTACACGCATTCAGTTCCCTGCGTTGTTGGTTCTATA	scaffold_98	100	95	0	0	1	95		109143	109237	1e-46	188
scf323.4	XI	91.164	<nnxnp>,(nn,np),nn,nn,np,np,np,np,np,np,nn,np,NP,nn,np,np,np,nn,np,np,np,np,nn,nn,np,np,np,nn,np,nn,np,nn	TGCAGGTGCTCACTCGTACCACTGCTGGCGGAGCAGGCTTCCACTAGGATGGAGCTCTATGAAGAAAGGGCCTCTACAAAATGTATTTGTTCTGC	scaffold_323	100	95	0	0	1	95		279354	279448	1e-46	188
scf323	XI	93.889	<hkxhk>,(hh,hk,kk),HK,hh,kk,kk,kk,hk,hk,kk,hh,hk,hk,hh,hk,hk,kk,hh,kk,kk,kk,kk,hk,hk,kk,hk,kk,hk,HK,hh,kk,hh	TGCAGGGTATATGGAGGTACGGGCTATCCCAAAAATATTTTACACGTGTGACATGTCATAACCCGTTTAATGTTTCATGGTAGGACTATCCACTA	scaffold_323	98.95	95	1	0	1	95		386114	386020	2e-44	180
scf323.1	XI	121.298	<lmxll>,(ll,lm),lm,--,ll,ll,ll,lm,lm,ll,--,lm,lm,--,LM,lm,ll,--,ll,ll,ll,ll,lm,lm,--,lm,ll,--,ll,--,ll,--	TGCAGGTGACGTGCAGTTTAAACAGATTCCTGGCTGGAATAGTGTAAATGCCGGTAGAGTAATGCATTCTGATCCGGCCGGGCCGCTCACGACTA	scaffold_323	97.89	95	2	0	1	95		278793	278887	6e-42	172
scf98.7	XI	121.298	<lmxll>,(ll,lm),lm,--,ll,ll,ll,lm,lm,ll,--,lm,lm,--,lm,lm,ll,--,ll,ll,ll,ll,lm,lm,ll,lm,ll,lm,ll,--,ll,--	TGCAGGGAGGAGCGGGGGTCGAGCGGGAGAGAAGAAACATTCCGAGTCTTTGAAAATGCTCGGAAGGAAACCAATGACACGAGAAATAAAAACAT	scaffold_98	98.95	95	1	0	1	95		119508	119414	2e-44	180
scf6676	XII	0	<hkxhk>,(hh,hk,kk),hk,hh,hh,hh,hk,hk,hh,hk,hh,kk,hk,kk,hk,kk,kk,hk,hh,kk,hh,hk,hh,hh,--,hh,kk,kk,hh,hh,hh,hk	TGCAGGCTGCGCTCCGTTTGCCTCAGCATCTCCTGCAGCGAGCGCACGTTGCTCCGCAGCCGCAGCTCTTCCGACATGGCCGAGACGTCTCCCGT	scaffold_6676	98.95	95	1	0	1	95		21973	21879	2e-44	180
scf2194	XII	17.398	<lmxll>,(ll,lm),--,lm,lm,lm,ll,ll,lm,ll,lm,lm,ll,--,--,lm,ll,ll,lm,ll,lm,--,--,lm,--,lm,lm,lm,ll,lm,lm,ll	TGCAGGGACCTGTTTTTGGATCCCCATTACAGGCAGGCACGGGGATGGACGGACGGACGGATGCATTGCTGGGTTCAATCTTTTGTCGCATGCGT	scaffold_2194	100	95	0	0	1	95		28159	28065	1e-46	188
60307	XII	28.068	<efxeg>,(ee,ef,eg,fg),ee,eg,eg,eg,fg,fg,eg,fg,eg,ef,fg,ee,ee,ef,fg,fg,fg,ef,eg,ee,eg,eg,ee,eg,ee,ef,fg,eg,eg,ef	TGCAGGGGGTGCGACTGCTCCAGGGCCCAGGCATCGGGCTATGACGTGGTAGATCAATTAAATATCGTGGGCAGAAGCCTGGTGGATTGGTGCAC
scf15557	XII	28.068	<lmxll>,(ll,lm),ll,ll,ll,ll,lm,lm,ll,lm,ll,lm,lm,ll,ll,lm,lm,lm,lm,lm,ll,ll,ll,ll,ll,ll,ll,lm,lm,ll,ll,lm	TGCAGGGGAAGCTTCTTAAAGCGCTCTGAGCATCACTTTGAATCTTTAATCTTCAATGCCCGTTTTTATGTCGAGAGAGCTGTGGGGCCAGTCCT	scaffold_15557	98.95	95	1	0	1	95		2922	2828	2e-44	180
scf17423	XII	28.068	<hkxhk>,(hh,hk,kk),hh,hk,hk,hk,kk,kk,hk,kk,hk,hk,kk,hh,hh,hk,kk,kk,kk,hk,hk,hh,hk,hk,hh,hk,hh,hk,kk,hk,hk,hk	TGCAGGTGCCCAAGGAGCGCTCGCTCACCGATGGTGACGCCGAGACAGGGACAAGACTCCCAGGCAACTACCGGTGGACTCCCCTGCAGTGAGTT	scaffold_17423	98.95	95	1	0	1	95		1239	1145	2e-44	180
scf642	XII	28.068	<hkxhk>,(hh,hk,kk),kk,hk,hk,hk,hh,hh,hk,hh,hk,hk,hh,kk,kk,hk,hh,hh,hh,hk,hk,kk,hk,hk,kk,hk,kk,hk,hh,hk,hk,hk	TGCAGGGCTCACACGCACCTTTTTGTGCCACTCGACCGCCCCGTGGTGCCAAGAAGGGGGGTGAACAAGAGGGCCGCCGTCCTGGGGAGCATCCG	scaffold_642	98.95	95	1	0	1	95		56437	56343	2e-44	180
scf76.3	XII	28.068	<hkxhk>,(hh,hk,kk),hh,hk,hk,hk,kk,kk,hk,kk,hk,hk,kk,hh,hh,hk,kk,kk,kk,hk,hk,hh,hk,hk,hh,hk,hh,hk,kk,hk,hk,hk	TGCAGGACAATGATGATCAGAGATGGCAATGTGCTATTGCACATCCTGTGAACAGCAATAAAATATTTTGAGAGTGTCACAACGAGAGATTGATG	scaffold_76	100	95	0	0	1	95		126818	126724	1e-46	188
scf6824	XII	31.518	<hkxhk>,(hh,hk,kk),kk,hk,hk,hk,hh,hh,HK,hh,hk,hk,hh,kk,kk,hk,hh,hh,hk,hh,hk,kk,--,hk,kk,HK,kk,hk,hh,hk,hk,hk	TGCAGGTGCTGTTTGTTTCCAGCATTCCATTCACAGGGATGCATTTGGATCTACGGATGAAATCCCCCTTTACAGGTATAAATGATTATTATTAA	scaffold_6824	100	95	0	0	1	95		12739	12833	1e-46	188
scf6824.1	XII	31.518	<hkxhk>,(hh,hk,kk),hh,hk,hk,hk,kk,kk,hk,kk,hk,hk,kk,hh,hh,hk,kk,kk,hk,kk,hk,hh,hk,hk,hh,hk,hh,hk,kk,hk,hk,hk	TGCAGGCGAGTTCTTTTGCCCGGCGGGGTTGAAGCAGTTTCCAACGTGTTGTTGCTGTTTTTATTATTTAATTATTCTGCTAGTTTACCCAGGAG	scaffold_6824	100	95	0	0	1	95		14494	14588	1e-46	188
scf7155	XII	31.518	<nnxnp>,(nn,np),nn,np,np,--,np,np,np,np,NP,nn,np,nn,nn,nn,np,np,np,np,np,nn,np,np,nn,np,nn,nn,np,np,np,nn	TGCAGGCCAACTGACGCGGGGACACGGCACGAGGAGCCCAGAACCCCCTTGTCTCTTCTCCGCCACTCGAGTGGAAAGATTCACACACGCGACAT	scaffold_7155	96.84	95	3	0	1	95		5506	5412	1e-39	165
scf7155.1	XII	31.518	<nnxnp>,(nn,np),nn,np,np,np,--,np,np,np,np,nn,np,nn,nn,nn,np,np,NP,np,np,nn,np,np,nn,np,nn,nn,np,np,np,nn	TGCAGGAGGCTCCTTATACGCCTCACGCTCGTGAAAAGCCTTGTGCGGGGATTTCACGACTTCGTCAACTTCGCCGGTGGCACGGAACCAAGGCA	scaffold_7155	100	95	0	0	1	95		5503	5597	1e-46	188
33396	XII	36.82	<efxeg>,(ee,ef,eg,fg),ee,eg,eg,eg,fg,fg,eg,fg,eg,ef,fg,ee,ee,ef,fg,fg,eg,fg,eg,ee,ee,eg,ee,eg,ef,ef,fg,eg,eg,fg	TGCAGGTCCCCTTGCTCAAGAAAGCACATATACATGCCCGTCTGAAGTTTGCCAATGCACATCTGAATGATTCAGTGGACAACTGGGTGAAAGTG
scf10090	XII	36.82	<nnxnp>,(nn,np),nn,np,np,np,np,np,np,np,np,nn,np,nn,nn,nn,np,np,np,np,np,nn,nn,np,--,np,--,nn,np,np,np,np	TGCAGGCGGGTTGCCGAGGAGAGGACGCTGCCCACCGTGGCGAGGGACAGGCCGAGCCTGCCCGTGTAAGCGTACGTGACCACCCCAGCCAAGCC	scaffold_10090	100	95	0	0	1	95		8003	8097	1e-46	188
scf486	XII	36.82	<lmxll>,(ll,lm),lm,lm,lm,lm,ll,ll,lm,ll,lm,ll,ll,lm,lm,ll,ll,ll,lm,ll,lm,lm,lm,lm,lm,lm,ll,ll,ll,lm,lm,ll	TGCAGGGCAGGGGTTCTCCCTCCAGTGAAGGCCCTCTGGCTAGCAGTGGCATGATCAAGCAATTTCAAGGCCGCACCTTAATCTTTATATATTTT	scaffold_486	98.95	95	1	0	1	95		22237	22331	2e-44	180
scf7444	XII	36.82	<nnxnp>,(nn,np),nn,np,np,np,np,np,np,np,np,nn,np,nn,nn,nn,np,np,np,np,np,nn,nn,np,nn,np,nn,nn,np,np,np,np	TGCAGGATATGCTCTACGACTTCCACATTAGCACCGAAGCGCAATATCAGTAGGCAATGCTGGAATAATGCACCGAAAATGTTTACAAAAATGAA	scaffold_7444	100	95	0	0	1	95		514	608	1e-46	188
scf769.1	XII	36.82	<lmxll>,(ll,lm),lm,lm,lm,lm,ll,ll,lm,ll,LM,ll,ll,lm,lm,ll,ll,ll,lm,ll,lm,lm,lm,lm,lm,lm,ll,ll,ll,LM,lm,ll	TGCAGGAGCAAAACATGCTGGGTACCACGACGGAGGACGTCGCTCAGTTCTTGCACAGCGAGAACCGACTGGACTCGGTACGCCCCCTTGATAAT	scaffold_769	100	95	0	0	1	95		36708	36614	1e-46	188
[truncated: 3,032 more rows]
