# Supplementary material for: The sea lamprey meiotic map improves resolution of ancient vertebrate genome duplications
Source: HighWire-hosted journal article supplement (doi:10.1101/gr.184135.114), 2015-06-05
Supplement: Supplemental_Table_S2.xlsx [file Supplemental_Table_S2.xlsx]

## Sheet: Chicken
Table S2 - The lamprey/chicken comparative map.
Linkage	Position	Lamprey Genomic Alignment						Chicken Genomic Alignment
Group	(cM)	Gene	Scaffold	Start	End	Direction		Chromosome	Start	End
I	5.379	PMZ_0000184	scaffold_270	37052	37523	-		chr2	17517411	17517509
I	5.379	PMZ_0000190	scaffold_270	411963	413384	+		chr2	135457940	135460280
I	5.379	PMZ_0000193	scaffold_270	444373	445751	+		chr2	104036595	104040808
I	5.379	PMZ_0000199	scaffold_270	591313	607819	+		chr2	18246820	18251915
I	5.379	PMZ_0000201	scaffold_270	611732	614920	+		chr2	104078514	104080287
I	5.379	PMZ_0000204	scaffold_270	715956	731742	+		chr2	119607392	119615962
I	5.379	PMZ_0000206	scaffold_270	786219	789252	-		chr2	121607732	121607187
I	5.379	PMZ_0000207	scaffold_270	894070	907892	-		chr2	31694280	31693802
I	5.379	PMZ_0000230	scaffold_270	1613225	1630672	+		chr2	153292047	153292586
I	5.379	PMZ_0000232	scaffold_270	1691400	1708513	+		chr2	153349141	153350972
I	5.379	PMZ_0000236	scaffold_270	1802897	1804892	+		chr2	153364253	153365488
I	5.379	PMZ_0000237	scaffold_270	1825517	1843560	-		chr2	137351523	137338560
I	5.379	PMZ_0000204	scaffold_270	715956	731742	+		chr20	3634238	3630121
I	5.379	PMZ_0000206	scaffold_270	786219	789252	-		chr20	5708978	5709815
I	5.379	PMZ_0000191	scaffold_270	426374	430421	+		chr23	4762008	4762118
I	5.379	PMZ_0000237	scaffold_270	1825517	1843560	-		chr23	4029476	4031361
I	5.379	PMZ_0000184	scaffold_270	37052	37523	-		chr27	3936790	3936692
I	5.379	PMZ_0000190	scaffold_270	411963	413384	+		chr3	84687574	84685445
I	5.379	PMZ_0000204	scaffold_270	715956	731742	+		chr3	58131897	58133790
I	5.379	PMZ_0000206	scaffold_270	786219	789252	-		chr3	58324148	58322144
I	5.379	PMZ_0000220	scaffold_270	1332012	1343001	-		chr3	57744641	57761653
I	5.379	PMZ_0000229	scaffold_270	1599820	1601867	+		chr3	91458269	91458105
I	5.379	PMZ_0000230	scaffold_270	1613225	1630672	+		chr3	86474462	86473854
I	5.379	PMZ_0000233	scaffold_270	1732804	1739486	+		chr3	91369776	91369600
I	5.379	PMZ_0000234	scaffold_270	1759784	1767119	+		chr3	91299042	91284011
I	5.379	PMZ_0000240	scaffold_270	1899612	1902823	-		chr4	35481594	35482709
I	5.379	PMZ_0000208	scaffold_270	901283	953130	+		chr5	27740245	27740075
I	5.379	PMZ_0000185	scaffold_270	170562	182026	+		chr7	36763405	36770079
I	5.379	PMZ_0000202	scaffold_270	633937	647848	+		chr7	36804480	36802208
I	5.379	PMZ_0000207	scaffold_270	894070	907892	-		chr7	16644771	16646449
I	5.379	PMZ_0000212	scaffold_270	1051072	1090653	-		chr7	4372101	4364188
I	5.379	PMZ_0000213	scaffold_270	1109605	1128344	-		chr7	4381184	4377992
I	5.379	PMZ_0000223	scaffold_270	1396167	1432722	-		chr7	4401532	4394591
I	5.379	PMZ_0000225	scaffold_270	1481750	1499483	-		chr7	4410640	4408970
I	5.379	PMZ_0000246	scaffold_270	2379668	2382096	-		chr9	5386911	5385399
I	10.847	PMZ_0002689	scaffold_35	610483	634987	+		chr2	63054113	63055342
I	10.847	PMZ_0002691	scaffold_35	668178	683018	+		chr2	63137251	63158046
I	10.847	PMZ_0002687	scaffold_35	372324	374819	+		chr20	9956205	9956330
I	10.847	PMZ_0002688	scaffold_35	594258	599182	+		chr20	2156641	2158056
I	10.847	PMZ_0002691	scaffold_35	668178	683018	+		chr23	5826507	5830683
I	10.847	PMZ_0002685	scaffold_35	22635	34879	+		chr3	174280	153737
I	10.847	PMZ_0002686	scaffold_35	44496	45647	-		chr3	97427132	97428160
I	10.847	PMZ_0002687	scaffold_35	372324	374819	+		chr3	98724872	98724997
I	10.847	PMZ_0002684	scaffold_35	7156	14493	+		chr5	28462349	28466278
I	10.847	PMZ_0002685	scaffold_35	22635	34879	+		chr5	46841581	46809465
I	14.296	PMZ_0011361	scaffold_737	30413	37279	+		chr1	48974154	48964327
I	14.296	PMZ_0002913	scaffold_1128	155434	172302	+		chr1	47619004	47617101
I	14.296	PMZ_0002914	scaffold_1128	173407	191222	+		chr1	47609640	47609393
I	14.296	PMZ_0002916	scaffold_1128	261027	267305	+		chr1	47612907	47612764
I	14.296	PMZ_0002920	scaffold_1128	617708	631831	-		chr1	106489283	106486587
I	14.296	PMZ_0002919	scaffold_1128	363203	372475	-		chr12	10919324	10913631
I	14.296	PMZ_0020684	scaffold_8537	1570	10572	+		chr2	118624997	118612473
I	14.296	PMZ_0002918	scaffold_1128	338681	352687	-		chr2	719507	719656
I	14.296	PMZ_0011365	scaffold_737	82882	89967	+		chr23	4630483	4627121
I	14.296	PMZ_0002920	scaffold_1128	617708	631831	-		chr24	1691278	1686428
I	14.296	PMZ_0011361	scaffold_737	30413	37279	+		chr26	4075054	4073710
I	14.296	PMZ_0011362	scaffold_737	45259	62620	+		chr26	4030024	4024793
I	14.296	PMZ_0011363	scaffold_737	65678	73915	-		chr5	17309315	17304382
I	16.021	PMZ_0005482	scaffold_133	79159	94572	+		chr14	5110815	5101893
I	16.021	PMZ_0005480	scaffold_133	42688	44586	-		chr2	44507732	44509633
I	16.021	PMZ_0005485	scaffold_133	137788	144381	-		chr20	9115160	9110257
I	16.021	PMZ_0005477	scaffold_133	1902	25374	-		chr3	105193990	105194442
I	16.021	PMZ_0005486	scaffold_133	178380	184567	-		chr3	95938764	95938237
I	19.471	PMZ_0004597	scaffold_137	411727	419084	+		chr1	50515541	50515251
I	19.471	PMZ_0004599	scaffold_137	436856	453686	+		chr1	50377876	50352011
I	19.471	PMZ_0004591	scaffold_137	136917	138280	+		chr14	4801874	4802086
I	19.471	PMZ_0004595	scaffold_137	189238	199946	+		chr14	9332810	9337000
I	19.471	PMZ_0004597	scaffold_137	411727	419084	+		chr14	9473969	9474196
I	19.471	PMZ_0004598	scaffold_137	426228	432620	+		chr14	9558536	9569670
I	19.471	PMZ_0004599	scaffold_137	436856	453686	+		chr14	9582054	9618111
I	19.471	PMZ_0004593	scaffold_137	168786	170673	+		chr18	10365119	10364131
I	19.471	PMZ_0004594	scaffold_137	171129	177531	+		chr18	10363089	10359130
I	19.471	PMZ_0004596	scaffold_137	250685	255290	+		chr18	2282370	2286503
I	19.471	PMZ_0004590	scaffold_137	130161	133881	+		chr24	3821322	3820963
I	19.471	PMZ_0004592	scaffold_137	142995	158434	+		chr26	4156131	4163317
I	32.844	PMZ_0009061	scaffold_5895	147910	157014	+		chr2	147633813	147634007
I	32.844	PMZ_0009062	scaffold_5895	170885	181718	-		chr23	5458148	5454513
I	32.844	PMZ_0009061	scaffold_5895	147910	157014	+		chr3	68459895	68459704
I	35.122	PMZ_0021241	scaffold_9751	632	10353	+		chr24	151449	140192
I	43.957	PMZ_0005060	scaffold_577	33192	38753	-		chr1	74233983	74232572
I	43.957	PMZ_0005062	scaffold_577	347557	381571	+		chr26	1618610	1626434
I	43.957	PMZ_0015669	scaffold_2766	968	21835	+		chr5	327010	333218
I	43.957	PMZ_0005060	scaffold_577	33192	38753	-		chr5	15265656	15269848
I	45.745	PMZ_0013483	scaffold_1582	4230	47452	+		chr1	68695606	68735849
I	45.745	PMZ_0016470	scaffold_3546	20700	32214	-		chr1	6317799	6321948
I	45.745	PMZ_0013484	scaffold_1582	52499	54865	-		chr1	76308273	76308530
I	45.745	PMZ_0015936	scaffold_2919	7874	26460	+		chr26	3606692	3617431
I	45.745	PMZ_0008086	scaffold_1142	148553	165610	-		chr28	4286221	4286896
I	45.745	PMZ_0016468	scaffold_3546	121	14889	+		chr5	19964305	19951230
I	45.745	PMZ_0008083	scaffold_1142	1351	5588	+		chr5	464261	461886
I	45.745	PMZ_0008086	scaffold_1142	148553	165610	-		chr8	20857262	20859744
I	45.745	PMZ_0008086	scaffold_1142	148553	165610	-		chrZ	29298365	29296858
I	47.47	PMZ_0011867	scaffold_1141	45776	48699	-		chr14	14322757	14325105
I	47.47	PMZ_0011867	scaffold_1141	45776	48699	-		chr18	10057578	10053822
I	48.937	PMZ_0008017	scaffold_989	197326	199797	+		chr14	14314992	14317266
I	48.937	PMZ_0008018	scaffold_989	203903	211659	-		chr14	13934126	13934467
I	48.937	PMZ_0008015	scaffold_989	16225	22037	-		chr18	6266851	6263845
I	48.937	PMZ_0008017	scaffold_989	197326	199797	+		chr18	3359996	3361254
I	50.891	PMZ_0010608	scaffold_498	6200	13219	+		chr14	12865275	12866478
I	50.891	PMZ_0010609	scaffold_498	28914	71446	+		chr14	6303976	6325317
I	50.891	PMZ_0010610	scaffold_498	78185	89166	+		chr14	6329065	6332570
I	50.891	PMZ_0018322	scaffold_7651	15796	19146	+		chr3	58739471	58741944
I	53.51	PMZ_0011145	scaffold_5289	4086	8938	+		chr20	7918047	7917293
I	61.368	PMZ_0009872	scaffold_1579	145941	162829	+		chr2	119252513	119265608
I	61.368	PMZ_0009871	scaffold_1579	108814	120466	-		chr20	8420371	8422994
I	61.368	PMZ_0009872	scaffold_1579	145941	162829	+		chr20	9505602	9502947
I	61.368	PMZ_0009077	scaffold_1330	7675	17624	+		chr3	109675799	109669174
I	61.368	PMZ_0009080	scaffold_1330	167491	184934	+		chr3	107408437	107416889
I	63.092	PMZ_0017570	scaffold_4255	10882	25470	+		chr1	134505443	134520807
I	63.092	PMZ_0017570	scaffold_4255	10882	25470	+		chr13	11470024	11456649
I	63.092	PMZ_0015233	scaffold_3097	28560	32984	-		chr4	7011487	7011038
I	63.092	PMZ_0011985	scaffold_2454	15680	27153	+		chr6	6246088	6240483
I	64.817	PMZ_0007955	scaffold_963	137755	167493	-		chr2	63881193	63868277
I	74.053	PMZ_0009883	scaffold_3052	13269	24545	+		chr14	3092600	3091767
I	76.94	PMZ_0010522	scaffold_536	82132	89044	+		chr3	59163606	59164787
I	76.94	PMZ_0010523	scaffold_536	90555	102341	-		chr3	59271703	59264184
I	82.943	PMZ_0003038	scaffold_13	293649	298234	-		chr15	6616591	6617616
I	82.943	PMZ_0010350	scaffold_398	44300	60028	+		chr2	64360977	64363206
I	82.943	PMZ_0010352	scaffold_398	84613	85016	-		chr2	2070457	2070239
I	82.943	PMZ_0010353	scaffold_398	91750	111492	+		chr2	64372964	64387082
I	82.943	PMZ_0003039	scaffold_13	303857	308459	+		chr2	133511121	133511997
I	82.943	PMZ_0003040	scaffold_13	319604	336035	+		chr2	143770612	143763089
I	82.943	PMZ_0003041	scaffold_13	346095	348636	-		chr2	113647666	113641403
I	82.943	PMZ_0003035	scaffold_13	11783	13045	+		chr20	9874111	9873758
I	82.943	PMZ_0003041	scaffold_13	346095	348636	-		chr23	2485704	2484256
I	82.943	PMZ_0010350	scaffold_398	44300	60028	+		chr3	91119114	91121405
I	82.943	PMZ_0003037	scaffold_13	293118	298444	+		chr3	104268789	104268670
I	82.943	PMZ_0003041	scaffold_13	346095	348636	-		chr3	51953283	51955155
I	87.163	PMZ_0005071	scaffold_97	56816	74406	+		chr3	101840859	101858006
I	87.163	PMZ_0005070	scaffold_97	40933	54651	-		chr8	12583000	12578073
I	109.005	PMZ_0005936	scaffold_393	114845	124720	-		chr1	50079535	50082405
I	109.005	PMZ_0004128	scaffold_115	144836	146134	+		chr1	52859837	52861171
I	109.005	PMZ_0006212	scaffold_91	187538	197964	-		chr1	49933210	49936034
I	109.005	PMZ_0006214	scaffold_91	213337	224490	-		chr1	53384019	53389358
I	109.005	PMZ_0005939	scaffold_393	170950	172912	-		chr10	3691537	3693327
I	109.005	PMZ_0004127	scaffold_115	6206	41225	+		chr14	4515018	4509236
I	109.005	PMZ_0005934	scaffold_393	6522	10578	-		chr14	5985499	5985702
I	109.005	PMZ_0005935	scaffold_393	97449	101149	-		chr14	15445902	15446828
I	109.005	PMZ_0004128	scaffold_115	144836	146134	+		chr14	4457806	4456508
I	109.005	PMZ_0006211	scaffold_91	64292	74626	+		chr18	4484827	4489645
I	109.005	PMZ_0005935	scaffold_393	97449	101149	-		chr18	9159993	9161006
I	109.005	PMZ_0004128	scaffold_115	144836	146134	+		chr18	8210090	8211370
I	109.005	PMZ_0006214	scaffold_91	213337	224490	-		chr18	4987386	4985438
I	109.005	PMZ_0006215	scaffold_91	228845	253028	-		chr18	9176671	9189506
I	109.005	PMZ_0005939	scaffold_393	170950	172912	-		chr28	1553420	1555084
I	109.005	PMZ_0013683	scaffold_8734	49890	56339	+		chr9	6925227	6929216
I	109.005	PMZ_0005939	scaffold_393	170950	172912	-		chrZ	67143820	67142027
I	119.603	PMZ_0014254	scaffold_1957	34791	42895	+		chr1	126827142	126824119
I	119.603	PMZ_0014253	scaffold_1957	21104	27358	+		chr10	7199102	7201726
I	119.603	PMZ_0014255	scaffold_1957	44058	50547	-		chr10	9107271	9102452
I	123.053	PMZ_0011276	scaffold_1829	14215	35775	-		chr1	53064629	53063175
I	123.053	PMZ_0011257	scaffold_700	48424	69581	-		chr1	112542985	112522581
I	123.053	PMZ_0006253	scaffold_1086	255175	265620	-		chr1	181993391	181989935
I	123.053	PMZ_0012915	scaffold_1285	10016	16056	-		chr14	7615749	7616344
I	123.053	PMZ_0011276	scaffold_1829	14215	35775	-		chr14	15206295	15202352
I	123.053	PMZ_0011276	scaffold_1829	14215	35775	-		chr18	4526226	4524411
I	123.053	PMZ_0012914	scaffold_1285	46	4717	+		chr2	44397671	44393655
I	123.053	PMZ_0012916	scaffold_1285	16006	18824	+		chr2	44383013	44379588
I	123.053	PMZ_0011259	scaffold_700	78501	82464	-		chr2	22082660	22082965
I	123.053	PMZ_0011277	scaffold_1829	83835	95574	+		chr24	2889683	2886736
I	123.053	PMZ_0022629	scaffold_13900	2326	6044	-		chr4	26309524	26311856
I	123.053	PMZ_0011259	scaffold_700	78501	82464	-		chr7	12742460	12742765
I	123.053	PMZ_0006252	scaffold_1086	239869	251508	+		chrZ	9918827	9913558
I	128.355	PMZ_0009478	scaffold_2221	3810	10935	-		chr1	53018112	53019849
I	128.355	PMZ_0009480	scaffold_2221	140525	161082	-		chr1	52008054	52006927
I	128.355	PMZ_0005831	scaffold_229	9406	16413	-		chr14	15664088	15663582
I	128.355	PMZ_0009480	scaffold_2221	140525	161082	-		chr14	6908015	6908513
I	128.355	PMZ_0005840	scaffold_229	298545	306153	+		chr14	8522211	8518330
I	128.355	PMZ_0005841	scaffold_229	313236	320169	+		chr14	4399048	4395333
I	128.355	PMZ_0009480	scaffold_2221	140525	161082	-		chr18	4039026	4040734
I	128.355	PMZ_0005836	scaffold_229	207011	218432	+		chr2	114818890	114819188
I	128.355	PMZ_0005833	scaffold_229	54099	80455	-		chr20	10074036	10081326
I	128.355	PMZ_0005835	scaffold_229	145792	170416	+		chr20	5036628	5042869
I	128.355	PMZ_0005836	scaffold_229	207011	218432	+		chr20	10064045	10064406
I	128.355	PMZ_0005845	scaffold_229	331250	339080	-		chr23	1431049	1432193
I	128.355	PMZ_0005834	scaffold_229	85365	91864	-		chr3	96583378	96589122
I	128.355	PMZ_0005837	scaffold_229	220805	244070	+		chr3	68619717	68646222
I	128.355	PMZ_0005832	scaffold_229	43592	53798	+		chr5	61319948	61321102
I	135.68	PMZ_0016509	scaffold_6698	6116	14807	-		chr1	52753730	52751337
I	135.68	PMZ_0018418	scaffold_5192	974	12570	+		chr14	6177639	6182774
I	135.68	PMZ_0016510	scaffold_6698	22287	31492	-		chr26	1084034	1085212
I	135.68	PMZ_0018420	scaffold_5192	19914	20768	-		chr5	13661288	13660659
I	148.028	PMZ_0011693	scaffold_1026	7879	9829	+		chr1	53103497	53104069
I	148.028	PMZ_0011695	scaffold_1026	33035	43144	+		chr1	52806736	52815112
I	148.028	PMZ_0011694	scaffold_1026	13002	23451	+		chr14	2199751	2193484
I	148.028	PMZ_0011696	scaffold_1026	46550	54900	-		chr14	2177184	2178515
I	148.028	PMZ_0011699	scaffold_1026	72407	85902	-		chr14	2126885	2142724
I	148.028	PMZ_0011693	scaffold_1026	7879	9829	+		chr18	6647575	6648443
I	153.331	PMZ_0001452	scaffold_2826	555941	570956	+		chr1	99730693	99731004
I	153.331	PMZ_0001453	scaffold_2826	641104	707493	+		chr1	99906631	99950261
I	153.331	PMZ_0001460	scaffold_2826	799318	801710	-		chr1	100451198	100451034
I	153.331	PMZ_0001448	scaffold_2826	26937	35476	-		chr24	480473	474855
I	153.331	PMZ_0001450	scaffold_2826	380970	392891	+		chr24	408985	416064
I	153.331	PMZ_0001460	scaffold_2826	799318	801710	-		chr24	248578	248730
I	153.331	PMZ_0001465	scaffold_2826	930136	936931	-		chr9	24980403	24971503
I	153.331	PMZ_0001466	scaffold_2826	937021	943141	+		chr9	4689531	4686185
I	160.634	PMZ_0003255	scaffold_167	361382	370236	+		chr1	113469780	113465459
I	160.634	PMZ_0003256	scaffold_167	372270	378499	-		chr1	84113022	84111828
I	160.634	PMZ_0003258	scaffold_167	389704	401187	-		chr24	56011	46218
I	162.376	PMZ_0011885	scaffold_948	13075	19367	-		chr18	9626162	9623063
I	162.376	PMZ_0011889	scaffold_948	69910	78650	+		chr6	17304670	17300877
I	175.413	PMZ_0013331	scaffold_1516	1342	1458	+		chr2	110232038	110231925
I	175.413	PMZ_0013331	scaffold_1516	1342	1458	+		chr20	10136885	10136772
I	180.707	PMZ_0010650	scaffold_517	3686	10075	+		chr1	179435645	179437289
I	180.707	PMZ_0010651	scaffold_517	13074	31485	+		chr1	128587523	128567212
I	180.707	PMZ_0010655	scaffold_517	67831	75392	+		chr23	2470577	2473595
I	180.707	PMZ_0010656	scaffold_517	79422	83348	+		chr3	63846564	63845049
I	180.707	PMZ_0010657	scaffold_517	105669	110430	+		chr3	63753663	63740969
I	180.707	PMZ_0010650	scaffold_517	3686	10075	+		chr4	44741203	44740557
I	180.707	PMZ_0010651	scaffold_517	13074	31485	+		chr4	9650592	9659758
I	180.707	PMZ_0010652	scaffold_517	26949	27243	-		chr4	26429532	26429718
I	180.707	PMZ_0010653	scaffold_517	32677	35719	+		chr4	41237447	41237065
I	180.733	PMZ_0006802	scaffold_1361	66450	67484	+		chr1	53188264	53188115
I	180.733	PMZ_0006807	scaffold_1361	240291	257896	+		chr14	3267771	3266832
I	180.733	PMZ_0006802	scaffold_1361	66450	67484	+		chr18	9031998	9031816
I	184.272	PMZ_0017050	scaffold_3808	7295	12085	-		chr14	2384250	2383120
II	3.45	PMZ_0004885	scaffold_2090	389634	404914	-		chr14	6979190	6992308
II	3.45	PMZ_0004884	scaffold_2090	368502	383091	-		chr23	550349	547757
II	3.45	PMZ_0004886	scaffold_2090	413537	415935	+		chr23	5560209	5561048
II	3.45	PMZ_0018284	scaffold_8592	435	3885	+		chr3	108001401	108001559
II	3.45	PMZ_0004877	scaffold_2090	32092	64714	+		chr3	107766095	107758665
II	3.45	PMZ_0004880	scaffold_2090	186400	190398	+		chr3	107393165	107394479
II	3.45	PMZ_0004881	scaffold_2090	190589	192223	+		chr3	107394517	107395165
II	3.45	PMZ_0004886	scaffold_2090	413537	415935	+		chr3	99648789	99650544
II	10.753	PMZ_0013440	scaffold_2029	19641	35940	+		chr23	5343056	5345074
II	10.753	PMZ_0015986	scaffold_3254	33920	35704	+		chr3	99891853	99892800
II	14.212	PMZ_0009392	scaffold_7747	1704	27564	+		chr2	143795307	143812597
II	14.212	PMZ_0009393	scaffold_7747	28561	49931	-		chr3	110161999	110171422
II	15.945	PMZ_0011961	scaffold_1447	48656	55605	+		chr10	19479188	19479475
II	15.945	PMZ_0011959	scaffold_1447	1218	14504	+		chr2	104185031	104164590
II	15.945	PMZ_0011960	scaffold_1447	20830	40202	-		chr23	5745459	5735631
II	16.808	PMZ_0006580	scaffold_265	155880	170381	+		chr5	38023522	38029988
II	16.808	PMZ_0006582	scaffold_265	208561	215734	-		chr5	30013165	30012911
II	19.395	PMZ_0013669	scaffold_3365	40931	54112	-		chr10	968451	959451
II	19.395	PMZ_0013668	scaffold_3365	21331	37629	-		chr2	120899772	120867757
II	24.569	PMZ_0019747	scaffold_6944	4	11315	-		chr2	119543455	119532338
II	28.019	PMZ_0017266	scaffold_4036	12094	17589	-		chr20	8869296	8862722
II	28.019	PMZ_0017266	scaffold_4036	12094	17589	-		chr3	107877804	107876079
II	29.744	PMZ_0016070	scaffold_3142	419	8061	-		chr2	122094873	122090594
II	29.744	PMZ_0016071	scaffold_3142	15222	21232	-		chr2	122106217	122103739
II	37.757	PMZ_0015807	scaffold_3274	19790	35692	-		chr3	58202958	58199143
II	39.126	PMZ_0018641	scaffold_6442	2566	14857	+		chr2	119606680	119616719
II	39.126	PMZ_0018641	scaffold_6442	2566	14857	+		chr20	3635631	3629782
II	40.579	PMZ_0018116	scaffold_5169	1411	13829	+		chr3	62202262	62185821
II	41.838	PMZ_0013317	scaffold_1568	34	7748	-		chr2	144362861	144357653
II	41.838	PMZ_0013319	scaffold_1568	23584	56139	+		chr2	105617619	105599186
II	44.596	PMZ_0016259	scaffold_3791	22806	33557	-		chr20	9751390	9750713
II	44.596	PMZ_0016259	scaffold_3791	22806	33557	-		chr23	3519560	3518886
II	47.355	PMZ_0011239	scaffold_691	1716	83673	+		chr2	143876467	143922527
II	47.355	PMZ_0011240	scaffold_691	93651	101442	-		chr2	65693540	65692821
II	47.355	PMZ_0011239	scaffold_691	1716	83673	+		chr20	1098759	1126189
II	47.355	PMZ_0014221	scaffold_1906	5069	49717	+		chr23	5631057	5648338
II	47.355	PMZ_0011721	scaffold_1795	39847	51030	-		chr26	4210862	4211534
II	50.822	PMZ_0011577	scaffold_840	10604	37667	+		chr23	5629943	5631143
II	50.822	PMZ_0011581	scaffold_840	81268	91619	+		chr23	5644221	5648582
II	50.822	PMZ_0011578	scaffold_840	42125	48702	+		chr3	2667563	2667402
II	50.822	PMZ_0011579	scaffold_840	59110	70028	+		chr3	89777448	89794679
II	50.822	PMZ_0011581	scaffold_840	81268	91619	+		chr3	89799556	89804228
II	50.822	PMZ_0011578	scaffold_840	42125	48702	+		chr5	63614	63423
II	54.846	PMZ_0017520	scaffold_4244	12	2207	+		chr2	65542489	65542334
II	54.846	PMZ_0017520	scaffold_4244	12	2207	+		chr20	11683549	11683698
II	54.846	PMZ_0017520	scaffold_4244	12	2207	+		chr23	5727292	5727441
II	54.846	PMZ_0017520	scaffold_4244	12	2207	+		chr3	90213309	90213467
II	57.109	PMZ_0013422	scaffold_1499	18688	32309	-		chr2	135456042	135460280
II	57.109	PMZ_0013422	scaffold_1499	18688	32309	-		chr23	5220532	5217950
II	57.109	PMZ_0013422	scaffold_1499	18688	32309	-		chr3	84693701	84685466
II	63.17	PMZ_0010301	scaffold_475	10648	14106	-		chr12	9192241	9192420
II	80.462	PMZ_0013516	scaffold_1552	2131	7376	-		chr2	139150568	139145026
II	80.462	PMZ_0013518	scaffold_1552	27070	54571	-		chr2	139187832	139171894
II	80.462	PMZ_0013516	scaffold_1552	2131	7376	-		chr23	5086951	5088543
II	81.325	PMZ_0011565	scaffold_1229	31242	68029	+		chr2	139079607	139063719
II	81.325	PMZ_0011566	scaffold_1229	88938	91329	+		chr2	139059836	139056441
II	81.325	PMZ_0011564	scaffold_1229	4460	13486	+		chr23	5104933	5108674
II	81.325	PMZ_0011565	scaffold_1229	31242	68029	+		chr3	92872782	92904259
II	88.235	PMZ_0022842	scaffold_14681	2046	5519	+		chr20	7831416	7830210
II	92.726	PMZ_0013264	scaffold_1469	2500	61878	-		chr2	61580715	61605105
II	96.378	PMZ_0011129	scaffold_750	57624	64268	-		chr1	169845566	169834846
II	96.378	PMZ_0003984	scaffold_423	260338	273924	+		chr2	144322696	144331794
II	96.378	PMZ_0003988	scaffold_423	316606	329821	-		chr2	63881148	63878053
II	96.378	PMZ_0003982	scaffold_423	173206	201698	+		chr28	1992673	1991671
II	96.378	PMZ_0020404	scaffold_7880	2111	3637	-		chr3	83598227	83601864
II	96.378	PMZ_0020405	scaffold_7880	4937	13232	-		chr3	83593952	83597788
II	96.378	PMZ_0011132	scaffold_750	93831	104416	-		chr3	84310498	84309525
II	96.378	PMZ_0003988	scaffold_423	316606	329821	-		chr3	54669982	54680231
II	96.378	PMZ_0003983	scaffold_423	230767	254808	+		chr5	3434967	3424367
II	96.378	PMZ_0003981	scaffold_423	20558	24201	+		chr8	26488068	26487895
II	96.378	PMZ_0003981	scaffold_423	20558	24201	+		chrZ	16187158	16187000
II	123.075	PMZ_0003131	scaffold_300	579717	602380	+		chr1	70478606	70468570
II	123.075	PMZ_0003123	scaffold_300	634	4191	+		chr2	46174225	46174016
II	123.075	PMZ_0003129	scaffold_300	427075	432779	+		chr5	19741528	19741638
II	123.075	PMZ_0003131	scaffold_300	579717	602380	+		chr5	8350282	8342959
II	134.494	PMZ_0008773	scaffold_2070	146892	154642	+		chr5	1422319	1418563
II	136.219	PMZ_0018728	scaffold_24957	17092	19389	-		chr5	15197415	15197057
II	136.669	PMZ_0016800	scaffold_10011	4722	5669	+		chr1	55356734	55356555
II	136.669	PMZ_0016801	scaffold_10011	20934	27973	-		chr1	784492	785681
II	136.669	PMZ_0016449	scaffold_4543	6936	15014	+		chr16	122486	122863
II	136.669	PMZ_0013591	scaffold_1612	39927	46416	-		chr26	2999357	3002589
II	136.669	PMZ_0016800	scaffold_10011	4722	5669	+		chr5	10535191	10535370
II	137.119	PMZ_0010856	scaffold_578	27487	35350	-		chr1	65430347	65433766
II	137.119	PMZ_0010857	scaffold_578	38866	54289	-		chr1	65265569	65279453
II	137.119	PMZ_0010859	scaffold_578	61673	69374	-		chr1	65247670	65254850
II	137.119	PMZ_0010862	scaffold_578	97324	115491	+		chr1	65114879	65108396
II	137.119	PMZ_0010855	scaffold_578	11523	17793	-		chr5	525812	525289
II	137.119	PMZ_0010860	scaffold_578	70346	75120	+		chr5	498059	496255
II	137.119	PMZ_0010862	scaffold_578	97324	115491	+		chr5	464672	461994
II	137.914	PMZ_0014814	scaffold_2214	27185	38447	-		chr26	790730	791358
II	137.914	PMZ_0014813	scaffold_2214	17051	22652	+		chr5	426276	435140
II	137.914	PMZ_0014814	scaffold_2214	27185	38447	-		chr5	15120160	15119290
II	140.063	PMZ_0010492	scaffold_459	23291	24112	-		chr1	76308264	76308608
II	140.063	PMZ_0010491	scaffold_459	1282	5812	-		chr26	3810674	3812638
II	146.666	PMZ_0001652	scaffold_260	32787	88440	+		chr1	32146829	32132541
II	146.666	PMZ_0006649	scaffold_310	47220	88891	+		chr1	49174886	49182277
II	146.666	PMZ_0006571	scaffold_434	81770	101399	+		chr1	44088578	44087436
II	146.666	PMZ_0006650	scaffold_310	178002	181549	+		chr1	49227878	49228003
II	146.666	PMZ_0007638	scaffold_372	180319	182043	+		chr1	43997692	43997066
II	146.666	PMZ_0006573	scaffold_434	197990	235066	+		chr1	78683740	78659194
II	146.666	PMZ_0006651	scaffold_310	203207	205593	+		chr1	49239165	49239401
II	146.666	PMZ_0006652	scaffold_310	223504	246283	+		chr1	49246372	49247240
II	146.666	PMZ_0006654	scaffold_310	277832	286153	+		chr1	31900678	31900944
II	146.666	PMZ_0001662	scaffold_260	444909	457488	-		chr1	70749797	70737804
II	146.666	PMZ_0019959	scaffold_7269	684	13053	-		chr19	9758845	9764200
II	146.666	PMZ_0006572	scaffold_434	158977	176643	+		chr26	45084	44923
II	146.666	PMZ_0006651	scaffold_310	203207	205593	+		chr26	3781437	3781676
II	146.666	PMZ_0001667	scaffold_260	697991	709774	-		chr26	3988530	3987492
II	146.666	PMZ_0006649	scaffold_310	47220	88891	+		chr5	2824022	2850518
II	146.666	PMZ_0006572	scaffold_434	158977	176643	+		chr5	8776635	8776468
II	146.666	PMZ_0001654	scaffold_260	235855	241440	-		chr5	19809146	19808928
II	146.666	PMZ_0007639	scaffold_372	240195	242254	-		chr5	26131637	26128815
II	146.666	PMZ_0001655	scaffold_260	271019	274225	-		chr5	19811913	19811692
II	146.666	PMZ_0001656	scaffold_260	293623	304050	-		chr5	2078996	2078563
II	146.666	PMZ_0001660	scaffold_260	420104	429200	+		chr5	19884398	19889187
II	146.666	PMZ_0001667	scaffold_260	697991	709774	-		chr5	10454166	10455239
II	146.666	PMZ_0001659	scaffold_260	374537	414193	+		chr9	14292663	14289351
II	151.36	PMZ_0014774	scaffold_2201	2069	38517	-		chr5	23703728	23711828
II	156.053	PMZ_0011627	scaffold_868	53550	56715	-		chr1	39911804	39910259
II	156.053	PMZ_0011628	scaffold_868	58089	66308	-		chr1	39916443	39912065
II	156.053	PMZ_0011624	scaffold_868	10683	34223	-		chr5	14172366	14188197
II	156.053	PMZ_0011627	scaffold_868	53550	56715	-		chr5	14145804	14146591
II	156.053	PMZ_0011625	scaffold_868	31052	39973	+		chrZ	62772602	62772429
II	160.747	PMZ_0002973	scaffold_195	25888	40270	+		chr1	42096341	42091983
II	160.747	PMZ_0002976	scaffold_195	155825	159240	+		chr1	38200393	38201268
II	160.747	PMZ_0002979	scaffold_195	302237	312189	+		chr1	38286435	38291497
II	160.747	PMZ_0002981	scaffold_195	363720	379244	+		chr1	38388965	38436264
II	160.747	PMZ_0002982	scaffold_195	433594	447858	+		chr1	38592112	38592276
II	160.747	PMZ_0002985	scaffold_195	548484	565565	+		chr1	38715013	38715795
II	160.747	PMZ_0002970	scaffold_195	146	881	-		chr10	15654670	15655407
II	160.747	PMZ_0002972	scaffold_195	9337	22211	+		chr26	951535	953197
II	160.747	PMZ_0002976	scaffold_195	155825	159240	+		chr26	476373	477266
II	160.747	PMZ_0002983	scaffold_195	472124	490574	+		chr27	3834679	3832901
II	160.747	PMZ_0002971	scaffold_195	9213	9542	-		chr28	3613264	3613590
II	160.747	PMZ_0002983	scaffold_195	472124	490574	+		chr4	59414468	59412477
II	160.747	PMZ_0002973	scaffold_195	25888	40270	+		chr5	19119788	19123426
II	160.747	PMZ_0002976	scaffold_195	155825	159240	+		chr5	3667868	3666981
II	160.747	PMZ_0002981	scaffold_195	363720	379244	+		chr5	13553921	13546202
II	160.747	PMZ_0002970	scaffold_195	146	881	-		chrZ	23743872	23744609
II	170.482	PMZ_0001398	scaffold_6143	393443	394770	+		chr1	454491	454697
II	170.482	PMZ_0001406	scaffold_6143	645766	651547	+		chr1	6165594	6161680
II	170.482	PMZ_0001410	scaffold_6143	838559	840318	-		chr1	75426829	75426993
II	170.482	PMZ_0001409	scaffold_6143	814205	824614	-		chr26	2038144	2037377
II	170.482	PMZ_0001413	scaffold_6143	1003122	1003553	-		chr26	2032715	2032527
II	170.482	PMZ_0001396	scaffold_6143	112011	144535	-		chr5	17746247	17766149
II	170.482	PMZ_0001397	scaffold_6143	368124	381581	+		chr5	10041918	10080004
II	170.482	PMZ_0001398	scaffold_6143	393443	394770	+		chr5	10141672	10141911
II	170.482	PMZ_0001402	scaffold_6143	447841	457582	+		chr5	17368944	17363180
II	170.482	PMZ_0001403	scaffold_6143	565587	584184	+		chr5	17309315	17304373
II	170.482	PMZ_0001408	scaffold_6143	677992	706028	+		chr5	10350181	10333997
II	170.482	PMZ_0001411	scaffold_6143	849608	849919	-		chr5	18805171	18804959
II	194.297	PMZ_0013706	scaffold_1685	13558	28257	-		chr5	19434052	19433933
II	196.556	PMZ_0007686	scaffold_274	2330	12785	-		chr5	20739949	20725462
II	200.634	PMZ_0016166	scaffold_4184	20443	32380	-		chr5	13660820	13651080
II	200.634	PMZ_0004123	scaffold_295	393982	402624	+		chr5	61384345	61382555
II	201.528	PMZ_0016611	scaffold_24780	12912	31057	+		chr1	69052736	69066073
II	201.528	PMZ_0016611	scaffold_24780	12912	31057	+		chr5	13022671	13007327
II	202.422	PMZ_0007501	scaffold_1091	11789	32714	-		chr3	47243406	47245348
II	202.422	PMZ_0007502	scaffold_1091	36403	39506	-		chr8	25899050	25898733
II	202.422	PMZ_0007503	scaffold_1091	49254	57427	-		chr8	28800915	28801103
II	202.422	PMZ_0007503	scaffold_1091	49254	57427	-		chrZ	43752629	43752447
III	0	PMZ_0007195	scaffold_633	43860	53439	+		chr1	1103135	1102974
III	0	PMZ_0007195	scaffold_633	43860	53439	+		chr12	9346178	9346351
III	0	PMZ_0007193	scaffold_633	14008	29212	+		chr2	41592112	41594699
III	0	PMZ_0007198	scaffold_633	253767	257087	+		chr2	56989117	56989617
III	0	PMZ_0011653	scaffold_1087	84367	85299	-		chr4	1330999	1330136
III	0	PMZ_0007195	scaffold_633	43860	53439	+		chr7	4843675	4843833
III	0	PMZ_0007198	scaffold_633	253767	257087	+		chr7	6636920	6637435
III	0	PMZ_0005420	scaffold_181	378164	379058	+		chr7	4822170	4823626
III	1.725	PMZ_0007583	scaffold_462	4859	17121	-		chr2	30940354	30935002
III	1.725	PMZ_0008626	scaffold_1804	13083	15232	-		chr2	20303009	20303155
III	1.725	PMZ_0007585	scaffold_462	200872	218890	-		chr2	105631501	105658342
III	1.725	PMZ_0007587	scaffold_462	220190	230755	-		chr2	105097795	105091995
III	1.725	PMZ_0008628	scaffold_1804	192676	200874	-		chr26	1973652	1974854
III	3.45	PMZ_0011674	scaffold_905	38921	42528	-		chr1	174794677	174789177
III	3.45	PMZ_0016760	scaffold_3644	6406	10963	+		chr2	26791480	26792040
III	3.45	PMZ_0011672	scaffold_905	237	12026	+		chr4	16694834	16692815
III	3.45	PMZ_0011675	scaffold_905	57716	66859	-		chr4	51440509	51444318
III	3.45	PMZ_0019059	scaffold_5948	1	17996	-		chr7	6911658	6901001
III	3.45	PMZ_0015890	scaffold_2962	3458	28829	+		chr7	10877344	10852141
III	4.297	PMZ_0012096	scaffold_973	31140	39156	+		chr15	5478728	5479356
III	4.297	PMZ_0012096	scaffold_973	31140	39156	+		chr19	3274607	3276174
III	17.495	PMZ_0007689	scaffold_3600	182420	239834	-		chr2	9966649	9918156
III	21.481	PMZ_0015488	scaffold_2694	486	28282	+		chr6	12578469	12575503
III	22.017	PMZ_0012457	scaffold_24766	6112	6255	+		chr2	12911245	12911105
III	22.017	PMZ_0012458	scaffold_24766	38851	44229	+		chr2	12794511	12780595
III	22.017	PMZ_0012458	scaffold_24766	38851	44229	+		chr7	13211421	13205507
III	22.641	PMZ_0013729	scaffold_1666	40259	41107	-		chr2	11714992	11714876
III	22.641	PMZ_0013729	scaffold_1666	40259	41107	-		chr7	13364305	13364652
III	24.366	PMZ_0013457	scaffold_1901	1204	42162	-		chr2	11339963	11354357
III	34.503	PMZ_0006601	scaffold_548	181040	189935	+		chr2	36242382	36238787
III	34.503	PMZ_0006601	scaffold_548	181040	189935	+		chr7	16067819	16070930
III	34.503	PMZ_0006603	scaffold_548	250346	255318	+		chr7	16261128	16264622
III	34.503	PMZ_0006604	scaffold_548	255922	259131	+		chr7	16265229	16266368
III	34.503	PMZ_0006606	scaffold_548	281897	290872	-		chr7	16495999	16489482
III	36.228	PMZ_0018615	scaffold_5533	13	20031	+		chr2	5666300	5662226
III	36.228	PMZ_0018615	scaffold_5533	13	20031	+		chr7	36177344	36182046
III	36.228	PMZ_0006229	scaffold_349	239462	262230	-		chr7	36197556	36188168
III	40.604	PMZ_0002017	scaffold_49	730434	737354	+		chr1	7009289	7008000
III	40.604	PMZ_0002006	scaffold_49	263223	264251	-		chr2	14181383	14181502
III	40.604	PMZ_0002018	scaffold_49	740235	756822	-		chr2	49129481	49140484
III	40.604	PMZ_0002008	scaffold_49	380521	386249	+		chr27	4709935	4715120
III	40.604	PMZ_0002016	scaffold_49	619136	642703	+		chr7	4630736	4627671
III	55.274	PMZ_0010341	scaffold_387	133420	136298	-		chr2	46174228	46170366
III	55.274	PMZ_0010340	scaffold_387	54519	129270	+		chr7	2255533	2285962
III	60.869	PMZ_0010968	scaffold_615	59361	84882	-		chr2	27276552	27270204
III	60.869	PMZ_0010966	scaffold_615	11384	19034	-		chr9	4567656	4567504
III	62.658	PMZ_0011663	scaffold_1489	55379	60653	+		chr2	50711094	50699243
III	62.658	PMZ_0011660	scaffold_1489	9003	11955	-		chr27	4040375	4039722
III	62.658	PMZ_0011661	scaffold_1489	14162	27275	-		chr27	4045159	4040983
III	62.658	PMZ_0011662	scaffold_1489	29888	43015	+		chr7	27094225	27098242
III	64.447	PMZ_0011516	scaffold_795	56216	64653	+		chr15	2749485	2740829
III	64.447	PMZ_0018186	scaffold_4929	6344	14282	+		chr2	133345	136674
III	64.447	PMZ_0001868	scaffold_30	220162	221195	+		chr2	2364707	2364231
III	64.447	PMZ_0001874	scaffold_30	413452	417404	+		chr2	5318478	5325426
III	64.447	PMZ_0001876	scaffold_30	477953	485429	+		chr2	5215313	5200941
III	64.447	PMZ_0011516	scaffold_795	56216	64653	+		chr20	1377612	1344212
III	64.447	PMZ_0001868	scaffold_30	220162	221195	+		chr27	1118895	1119371
III	64.447	PMZ_0001869	scaffold_30	275507	304068	+		chr27	1359767	1358414
III	64.447	PMZ_0001870	scaffold_30	337344	343728	+		chr27	1558511	1556023
III	64.447	PMZ_0001873	scaffold_30	402369	410733	+		chr27	1543041	1542883
III	64.447	PMZ_0001887	scaffold_30	813612	824242	-		chr27	2214600	2221923
III	64.447	PMZ_0018187	scaffold_4929	13158	20273	-		chr7	24105920	24105545
III	64.447	PMZ_0011750	scaffold_902	25426	29875	+		chr7	1369149	1364463
III	64.447	PMZ_0011751	scaffold_902	41271	68865	+		chr7	12960623	12976558
III	64.447	PMZ_0011518	scaffold_795	87239	93163	-		chr7	26999427	27005636
III	64.447	PMZ_0001866	scaffold_30	159373	161934	+		chr7	23946785	23946381
III	64.447	PMZ_0001867	scaffold_30	178369	178890	+		chr7	23942878	23942414
III	64.447	PMZ_0001871	scaffold_30	345094	348122	+		chr7	20986470	20987902
III	64.447	PMZ_0001872	scaffold_30	350895	399521	+		chr7	20990525	20999359
III	64.447	PMZ_0001874	scaffold_30	413452	417404	+		chr7	21009950	21016177
III	64.447	PMZ_0001875	scaffold_30	448947	469182	+		chr7	21484619	21501076
III	64.447	PMZ_0001877	scaffold_30	487692	499614	+		chr7	21132134	21162564
III	64.447	PMZ_0001878	scaffold_30	506890	519859	+		chr7	21175542	21187541
III	64.447	PMZ_0001879	scaffold_30	520850	526906	-		chr7	19471476	19469922
III	64.447	PMZ_0001881	scaffold_30	577033	654111	+		chr7	38139569	38164090
III	64.447	PMZ_0001882	scaffold_30	656661	664986	-		chr7	38167894	38167745
III	64.447	PMZ_0001883	scaffold_30	693784	717756	-		chr7	38230334	38195832
III	64.447	PMZ_0001885	scaffold_30	782161	790748	+		chr7	38339910	38340071
III	64.447	PMZ_0001887	scaffold_30	813612	824242	-		chr7	29492360	29468926
III	64.447	PMZ_0001872	scaffold_30	350895	399521	+		chrE22C19W28_E50C23	71968	64943
III	66.172	PMZ_0004777	scaffold_100	31792	32118	+		chr27	2203926	2203681
III	66.172	PMZ_0004779	scaffold_100	78165	168029	-		chr7	37126722	37170056
III	66.172	PMZ_0004780	scaffold_100	191230	224613	-		chr7	28790132	28767065
III	66.172	PMZ_0004783	scaffold_100	274849	275604	+		chr7	29587888	29587778
III	67.897	PMZ_0010575	scaffold_501	21963	31432	-		chr7	22625392	22632643
III	67.897	PMZ_0010577	scaffold_501	45605	80078	-		chr7	23316884	23332144
III	69.592	PMZ_0006171	scaffold_191	180255	196757	-		chr1	58387146	58407397
III	69.592	PMZ_0006168	scaffold_191	115434	123534	+		chr12	8901368	8900619
III	69.592	PMZ_0006167	scaffold_191	110404	114835	+		chr14	15711733	15711128
III	69.592	PMZ_0006164	scaffold_191	25213	57002	+		chr2	7533427	7533582
III	69.592	PMZ_0006171	scaffold_191	180255	196757	-		chr27	4585631	4607653
III	69.592	PMZ_0006164	scaffold_191	25213	57002	+		chr7	30825535	30825380
III	69.592	PMZ_0006165	scaffold_191	59827	74536	+		chr7	30798796	30795140
III	69.592	PMZ_0006166	scaffold_191	82902	91996	+		chr7	30476837	30505277
III	69.592	PMZ_0006168	scaffold_191	115434	123534	+		chr7	10693401	10693207
III	69.592	PMZ_0006169	scaffold_191	139962	153596	-		chr7	10644951	10655668
III	72.142	PMZ_0013398	scaffold_1496	9793	10830	-		chr2	6168234	6168004
III	72.142	PMZ_0013401	scaffold_1496	21830	29159	-		chr2	6242452	6241586
III	72.142	PMZ_0013400	scaffold_1496	17857	21084	-		chr7	23976487	23975746
III	72.142	PMZ_0013401	scaffold_1496	21830	29159	-		chr7	23977291	23976911
III	74.737	PMZ_0008550	scaffold_1337	73190	82691	-		chr1	49464412	49474226
III	74.737	PMZ_0008554	scaffold_1337	133520	146762	-		chr1	49448371	49460602
III	74.737	PMZ_0010112	scaffold_493	41801	92051	+		chr2	57079138	57103882
III	74.737	PMZ_0008553	scaffold_1337	114084	129091	+		chr2	91444041	91445510
III	74.737	PMZ_0010114	scaffold_493	134142	155625	-		chr2	90848321	90865899
III	74.737	PMZ_0008546	scaffold_1337	10595	19990	-		chr26	2094791	2094594
III	74.737	PMZ_0008555	scaffold_1337	141714	149995	+		chr27	1358536	1358414
III	74.737	PMZ_0008556	scaffold_1337	199321	199647	+		chr4	37655495	37655653
III	74.737	PMZ_0008550	scaffold_1337	73190	82691	-		chr5	3406171	3411370
III	74.737	PMZ_0008554	scaffold_1337	133520	146762	-		chr5	3399331	3404452
III	74.737	PMZ_0008556	scaffold_1337	199321	199647	+		chr6	3159865	3159707
III	74.737	PMZ_0010111	scaffold_493	18397	37298	+		chr7	37873207	37870831
III	74.737	PMZ_0008551	scaffold_1337	86445	92284	+		chr7	24108511	24108645
III	74.737	PMZ_0010112	scaffold_493	41801	92051	+		chrE22C19W28_E50C23	13254	6996
III	74.737	PMZ_0008551	scaffold_1337	86445	92284	+		chrE22C19W28_E50C23	772044	771901
III	80.039	PMZ_0002566	scaffold_622	296067	325898	+		chr13	11404213	11407329
III	80.039	PMZ_0002578	scaffold_622	615177	621915	-		chr2	77581253	77575640
III	80.039	PMZ_0002579	scaffold_622	678979	694346	-		chr2	77518489	77525893
III	80.039	PMZ_0002567	scaffold_622	335970	347364	+		chr4	93129767	93127024
III	80.039	PMZ_0002569	scaffold_622	403755	415088	-		chr4	91763794	91757305
III	80.039	PMZ_0002567	scaffold_622	335970	347364	+		chr6	34408873	34400425
III	80.039	PMZ_0002569	scaffold_622	403755	415088	-		chr6	10504841	10502733
III	80.039	PMZ_0002571	scaffold_622	455354	469577	-		chr7	23779221	23782838
III	80.039	PMZ_0002573	scaffold_622	532306	584255	+		chr7	23571992	23517094
III	80.039	PMZ_0002575	scaffold_622	591069	592328	+		chr7	23800495	23798955
III	80.039	PMZ_0002576	scaffold_622	592642	599942	-		chr7	25116410	25121557
III	80.039	PMZ_0002577	scaffold_622	603756	609674	+		chr7	25096993	25096460
III	80.039	PMZ_0002579	scaffold_622	678979	694346	-		chr7	24985854	24993107
III	80.039	PMZ_0002570	scaffold_622	441908	455168	+		chrE22C19W28_E50C23	276228	272686
III	94.3	PMZ_0002348	scaffold_306	25727	37302	-		chr2	1971019	1970882
III	94.3	PMZ_0002356	scaffold_306	253271	254710	+		chr2	2106113	2105853
III	94.3	PMZ_0002357	scaffold_306	255531	260381	+		chr2	2104695	2102781
III	94.3	PMZ_0002360	scaffold_306	326788	338292	+		chr2	4539907	4526169
III	94.3	PMZ_0002369	scaffold_306	620010	626689	+		chr2	197135	196000
III	94.3	PMZ_0002373	scaffold_306	736913	742651	+		chr2	44128340	44128119
III	94.3	PMZ_0002355	scaffold_306	240938	244487	+		chr27	1193685	1200102
III	94.3	PMZ_0002350	scaffold_306	61113	69882	+		chr7	24100591	24098971
III	94.3	PMZ_0002362	scaffold_306	343681	360182	+		chr7	24032325	24033623
III	94.3	PMZ_0002368	scaffold_306	563596	577915	+		chr7	5301645	5289077
III	94.3	PMZ_0002369	scaffold_306	620010	626689	+		chr7	5225300	5219125
III	94.3	PMZ_0002372	scaffold_306	702246	703397	+		chr7	5017381	5016498
III	99.445	PMZ_0006547	scaffold_378	6121	12026	+		chr14	5125381	5122479
III	99.445	PMZ_0006548	scaffold_378	18193	58406	+		chr2	26030608	26053053
III	99.445	PMZ_0006551	scaffold_378	184736	192945	-		chr2	1897176	1899148
III	99.445	PMZ_0006552	scaffold_378	246009	266121	-		chr2	26257123	26254862
III	101.17	PMZ_0012110	scaffold_1303	1668	37147	-		chr2	26304164	26283649
III	104.619	PMZ_0006730	scaffold_299	70993	76739	+		chr2	42766787	42770671
III	104.619	PMZ_0018441	scaffold_5220	3256	9227	+		chr4	91763794	91763087
III	104.619	PMZ_0018441	scaffold_5220	3256	9227	+		chr6	10503874	10502733
III	104.619	PMZ_0014896	scaffold_4040	1853	5235	+		chr7	20132406	20127645
III	104.619	PMZ_0018442	scaffold_5220	16348	20121	+		chr7	20035328	20037293
III	104.619	PMZ_0006735	scaffold_299	230517	258146	-		chr7	20091647	20090174
III	104.619	PMZ_0006736	scaffold_299	252709	265450	+		chr7	20114346	20121418
III	104.619	PMZ_0006731	scaffold_299	195457	209476	-		chr8	4278442	4276888
III	104.619	PMZ_0014897	scaffold_4040	6617	33773	+		chr9	25061925	25064887
III	106.344	PMZ_0011080	scaffold_643	81890	86734	-		chr27	4744085	4744261
III	106.344	PMZ_0011079	scaffold_643	36031	46400	-		chr7	36649757	36637836
III	106.344	PMZ_0011081	scaffold_643	101693	106177	-		chr7	36733896	36733708
III	106.994	PMZ_0019432	scaffold_6448	1698	9182	+		chr2	4470705	4474388
III	109.766	PMZ_0007815	scaffold_588	217579	218295	-		chr2	26626923	26626269
III	109.766	PMZ_0007807	scaffold_588	14545	16296	-		chr7	29856061	29854118
III	109.766	PMZ_0007808	scaffold_588	17945	32399	+		chr7	29836330	29831132
III	109.766	PMZ_0007809	scaffold_588	38138	64773	+		chr7	29822533	29815796
III	109.766	PMZ_0007815	scaffold_588	217579	218295	-		chr7	33203777	33201996
III	109.766	PMZ_0007811	scaffold_588	173436	192818	+		chrE22C19W28_E50C23	245030	259202
III	109.766	PMZ_0007812	scaffold_588	191723	198482	-		chrE22C19W28_E50C23	889261	890507
III	110.101	PMZ_0018656	scaffold_5444	2054	8366	-		chr2	2244744	2237182
III	120.551	PMZ_0003367	scaffold_22	180959	219580	-		chr2	42677931	42656057
III	120.551	PMZ_0003370	scaffold_22	245156	249528	-		chr2	24091624	24090530
III	120.551	PMZ_0003371	scaffold_22	263068	271718	-		chr2	24138199	24125893
III	120.551	PMZ_0003374	scaffold_22	368771	426237	+		chr2	23566144	23568951
III	120.551	PMZ_0003376	scaffold_22	430760	446610	+		chr2	23594409	23597009
III	120.551	PMZ_0003368	scaffold_22	218971	228752	+		chr27	4147402	4140621
III	120.551	PMZ_0003364	scaffold_22	8967	22258	+		chr7	3672494	3662505
III	120.551	PMZ_0003366	scaffold_22	159941	177980	-		chr7	24123298	24115518
III	120.551	PMZ_0003370	scaffold_22	245156	249528	-		chr7	19384456	19385098
III	120.551	PMZ_0003371	scaffold_22	263068	271718	-		chr7	19357550	19365422
III	120.551	PMZ_0003373	scaffold_22	288637	319952	+		chr7	782688	778470
III	120.551	PMZ_0003374	scaffold_22	368771	426237	+		chr7	552894	557800
III	120.551	PMZ_0003377	scaffold_22	450065	482297	+		chr7	19043217	19044629
III	120.551	PMZ_0003379	scaffold_22	486278	508874	-		chr7	19113463	19096477
III	120.551	PMZ_0003383	scaffold_22	577524	580231	+		chr7_random	16277	16149
III	120.551	PMZ_0003383	scaffold_22	577524	580231	+		chr7	18923301	18923173
III	120.551	PMZ_0003365	scaffold_22	127309	155481	-		chrE22C19W28_E50C23	589496	600015
III	124.09	PMZ_0002305	scaffold_430	13722	20043	-		chr2	31694280	31693799
III	124.09	PMZ_0002303	scaffold_430	3731	6739	+		chr7	11330746	11327009
III	124.09	PMZ_0002305	scaffold_430	13722	20043	-		chr7	16644771	16646449
III	124.09	PMZ_0002312	scaffold_430	382959	405805	-		chr7	17322161	17315324
III	136.726	PMZ_0002092	scaffold_3	6452	51061	-		chr2	87136725	87111666
III	136.726	PMZ_0002094	scaffold_3	227783	240027	+		chr2	83444127	83442976
III	136.726	PMZ_0002095	scaffold_3	385480	399347	+		chr2	83154681	83128903
III	136.726	PMZ_0002096	scaffold_3	459551	460396	-		chr2	83034791	83033940
III	136.726	PMZ_0002099	scaffold_3	722790	744662	+		chr27	2601793	2606436
III	136.726	PMZ_0002093	scaffold_3	144292	158776	+		chr7	6682384	6697208
III	136.726	PMZ_0002096	scaffold_3	459551	460396	-		chr7	22063929	22064780
III	136.726	PMZ_0002097	scaffold_3	562765	567891	+		chr7	22342133	22342363
III	136.726	PMZ_0002098	scaffold_3	707635	709288	+		chr7	22512551	22512709
III	136.726	PMZ_0002099	scaffold_3	722790	744662	+		chr7	22540418	22567583
III	136.726	PMZ_0002100	scaffold_3	749067	757289	-		chr7	13043788	13037602
III	136.726	PMZ_0002102	scaffold_3	769229	780766	-		chr7	14769123	14772194
III	161.358	PMZ_0004575	scaffold_24925	36522	39848	+		chr2	28771621	28771791
III	161.358	PMZ_0004577	scaffold_24925	122602	132161	+		chr2	28814754	28820131
III	161.358	PMZ_0004576	scaffold_24925	118828	122386	+		chr7	6594396	6595436
III	161.358	PMZ_0004577	scaffold_24925	122602	132161	+		chr7	6595730	6598055
III	161.358	PMZ_0004579	scaffold_24925	192192	208272	+		chr7	6557528	6552944
III	161.358	PMZ_0004582	scaffold_24925	390278	435985	+		chr7	6199492	6178532
III	161.358	PMZ_0004583	scaffold_24925	455360	457760	-		chr7	6118733	6119170
III	161.358	PMZ_0004582	scaffold_24925	390278	435985	+		chrE22C19W28_E50C23	394411	401541
III	161.358	PMZ_0004583	scaffold_24925	455360	457760	-		chrE22C19W28_E50C23	407802	407341
III	166.377	PMZ_0013556	scaffold_1554	684	26528	-		chr2	35538275	35553834
III	173.815	PMZ_0003614	scaffold_616	85953	100583	-		chr2	40213996	40202105
III	173.815	PMZ_0003615	scaffold_616	101238	124150	+		chr2	40340156	40356857
III	173.815	PMZ_0003619	scaffold_616	167752	183689	+		chr2	45493499	45496211
III	173.815	PMZ_0003621	scaffold_616	381721	404015	+		chr2	45844325	45860244
III	173.815	PMZ_0003622	scaffold_616	432720	445575	-		chr2	56194048	56179842
III	173.815	PMZ_0012861	scaffold_1262	32528	54331	-		chr7	24150675	24152161
III	173.815	PMZ_0003613	scaffold_616	44929	49563	-		chr7	20177146	20176580
III	173.815	PMZ_0003614	scaffold_616	85953	100583	-		chr7	29751469	29744769
III	173.815	PMZ_0003615	scaffold_616	101238	124150	+		chr7	29788615	29795483
III	173.815	PMZ_0003616	scaffold_616	126329	134606	-		chr7	27841096	27837868
III	178.224	PMZ_0003384	scaffold_246	1428	7377	-		chr3	69541409	69551495
III	178.224	PMZ_0003385	scaffold_246	9066	30225	-		chr3	69509877	69540633
III	178.224	PMZ_0003388	scaffold_246	222730	235212	+		chr7	24789421	24790009
III	178.224	PMZ_0003389	scaffold_246	438926	465189	+		chr7	32269706	32268126
III	178.224	PMZ_0003390	scaffold_246	470095	474869	-		chr8	6472776	6472260
III	184.161	PMZ_0013235	scaffold_2340	48374	53052	-		chr1	88650201	88650656
III	184.161	PMZ_0013232	scaffold_2340	757	5778	-		chr2	78220530	78220324
III	184.161	PMZ_0020097	scaffold_7502	990	14476	+		chr2	78211539	78203088
III	184.161	PMZ_0002799	scaffold_147	438093	483940	+		chr2	9401312	9388158
III	184.161	PMZ_0004410	scaffold_415	229533	261200	+		chr27	3839606	3826876
III	184.161	PMZ_0004411	scaffold_415	265440	290441	+		chr27	3815498	3803931
III	184.161	PMZ_0013232	scaffold_2340	757	5778	-		chr7	29404296	29404520
III	184.161	PMZ_0019787	scaffold_7008	3084	10144	+		chr7	32059792	32061719
III	184.161	PMZ_0002793	scaffold_147	188081	188389	+		chr7	31877527	31877760
III	184.161	PMZ_0002796	scaffold_147	351073	369861	-		chr7	31952006	31951863
III	184.161	PMZ_0002798	scaffold_147	418163	431250	+		chr7	32068798	32092300
IV	9.659	PMZ_0001789	scaffold_288	214807	224693	-		chr1	145294904	145295053
IV	9.659	PMZ_0001793	scaffold_288	588272	589259	+		chr1	200212427	200213152
IV	9.659	PMZ_0001797	scaffold_288	797918	798874	-		chr1	185542067	185540324
IV	9.659	PMZ_0008109	scaffold_586	155016	203148	-		chr11	662770	696304
IV	9.659	PMZ_0001799	scaffold_288	817281	829529	-		chr11	21699831	21698363
IV	9.659	PMZ_0001800	scaffold_288	832811	845026	-		chr11	17034012	17031043
IV	9.659	PMZ_0001801	scaffold_288	847916	862927	-		chr11	21693423	21691201
IV	9.659	PMZ_0001797	scaffold_288	797918	798874	-		chr13	12430528	12413078
IV	9.659	PMZ_0008108	scaffold_586	26073	43484	+		chr2	78514151	78537686
IV	9.659	PMZ_0001793	scaffold_288	588272	589259	+		chr2	46281281	46280595
IV	9.659	PMZ_0001794	scaffold_288	596678	620379	+		chr2	67109721	67122619
IV	9.659	PMZ_0001798	scaffold_288	803095	813846	-		chr20	1518701	1537975
IV	9.659	PMZ_0001790	scaffold_288	390105	405553	-		chr3	66692731	66702597
IV	9.659	PMZ_0001791	scaffold_288	500792	503511	+		chr3	82017901	82018017
IV	9.659	PMZ_0001793	scaffold_288	588272	589259	+		chr4	2093355	2092630
IV	9.659	PMZ_0001797	scaffold_288	797918	798874	-		chr4	22560512	22564562
IV	9.659	PMZ_0001784	scaffold_288	2737	2871	-		chr6	18841799	18841692
IV	9.659	PMZ_0001791	scaffold_288	500792	503511	+		chr8	20390551	20390408
IV	9.659	PMZ_0001791	scaffold_288	500792	503511	+		chrZ	18242805	18242671
IV	9.659	PMZ_0001792	scaffold_288	520789	537811	-		chrZ	18338188	18304661
IV	30.045	PMZ_0014363	scaffold_2045	6343	12707	+		chr2	130669863	130670723
IV	30.045	PMZ_0014364	scaffold_2045	19945	25629	-		chr20	1009594	1023695
IV	33.491	PMZ_0005051	scaffold_1118	333212	342762	+		chr11	2138078	2144405
IV	33.491	PMZ_0005054	scaffold_1118	366006	375378	+		chr11	426339	429321
IV	33.491	PMZ_0005048	scaffold_1118	164559	180112	-		chr2	78601287	78616792
IV	33.491	PMZ_0005049	scaffold_1118	179177	194123	+		chr2	127889025	127894291
IV	33.491	PMZ_0005053	scaffold_1118	365531	374792	-		chr2	70267892	70267077
IV	33.491	PMZ_0005058	scaffold_1118	409480	411247	-		chr2	62666616	62668654
IV	33.491	PMZ_0005049	scaffold_1118	179177	194123	+		chr20	1082672	1087307
IV	33.491	PMZ_0005052	scaffold_1118	351231	360555	+		chr20	9896816	9903224
IV	35.216	PMZ_0018476	scaffold_5636	650	6568	+		chr11	19935070	19932884
IV	35.216	PMZ_0010598	scaffold_532	32856	41801	-		chr11	1483439	1485592
IV	35.216	PMZ_0010599	scaffold_532	66635	86013	+		chr11	1470222	1466711
IV	35.216	PMZ_0010601	scaffold_532	92950	103596	-		chr11	397783	396780
IV	35.216	PMZ_0012300	scaffold_1075	218	19944	+		chr14	7788008	7810989
IV	35.216	PMZ_0010597	scaffold_532	21849	31936	+		chr2	82062690	82050173
IV	35.216	PMZ_0010596	scaffold_532	6056	23151	-		chr20	10679733	10678175
IV	35.216	PMZ_0012303	scaffold_1075	27242	35010	+		chr21	3568997	3566859
IV	35.216	PMZ_0012302	scaffold_1075	20254	26525	-		chr8	30640938	30640015
IV	35.216	PMZ_0012304	scaffold_1075	37388	76644	-		chr9	11535762	11512941
IV	36.94	PMZ_0017585	scaffold_10134	17245	25577	+		chr11	449577	445541
IV	38.665	PMZ_0018692	scaffold_6413	8767	20264	+		chr19	9433377	9434345
IV	40.39	PMZ_0005107	scaffold_102	59798	62904	-		chr11	20303793	20305364
IV	69.874	PMZ_0016554	scaffold_3401	7084	9924	+		chr11	20341088	20342760
IV	69.874	PMZ_0016555	scaffold_3401	18940	29673	-		chr11	15144783	15141475
IV	69.874	PMZ_0010519	scaffold_612	111161	127761	+		chr11	15186509	15183820
IV	69.874	PMZ_0016554	scaffold_3401	7084	9924	+		chr2	136259546	136261768
IV	73.359	PMZ_0011121	scaffold_654	57182	75521	-		chr10	1082530	1094059
IV	73.359	PMZ_0011117	scaffold_654	345	5364	-		chr11	280419	276917
IV	73.359	PMZ_0011119	scaffold_654	15270	38301	+		chr11	1867163	1865081
IV	73.359	PMZ_0011118	scaffold_654	7528	9551	+		chr27	71966	72157
IV	73.359	PMZ_0011122	scaffold_654	85611	99929	+		chr7	6084969	6085142
IV	73.359	PMZ_0011120	scaffold_654	42873	54382	+		chrZ	53589789	53596522
IV	76.893	PMZ_0010818	scaffold_2224	4568	11924	-		chr1	12196164	12203240
IV	76.893	PMZ_0004809	scaffold_603	200835	213292	+		chr1	101484367	101480201
IV	76.893	PMZ_0004814	scaffold_603	280396	288201	+		chr10	3470279	3469278
IV	76.893	PMZ_0004806	scaffold_603	4769	12480	+		chr11	2294705	2297602
IV	76.893	PMZ_0004807	scaffold_603	23988	25148	+		chr11	2302277	2304419
IV	76.893	PMZ_0004808	scaffold_603	53332	89431	-		chr11	497563	484322
IV	76.893	PMZ_0010819	scaffold_2224	58671	64656	-		chr11	2231114	2231260
IV	76.893	PMZ_0004815	scaffold_603	292596	311609	-		chr11	1921594	1899745
IV	76.893	PMZ_0007881	scaffold_1535	170799	189146	+		chr2	96631178	96631330
IV	76.893	PMZ_0004810	scaffold_603	213768	230108	-		chr2	46797869	46783205
IV	76.893	PMZ_0004816	scaffold_603	407922	424159	-		chr2	96586066	96585857
IV	76.893	PMZ_0004814	scaffold_603	280396	288201	+		chr3	29555197	29556267
IV	76.893	PMZ_0004814	scaffold_603	280396	288201	+		chr5	62086942	62085878
IV	88.192	PMZ_0016108	scaffold_3071	465	9877	-		chr20	3792700	3795732
IV	88.217	PMZ_0008053	scaffold_384	91352	113704	+		chr11	8121413	8106261
IV	88.217	PMZ_0008055	scaffold_384	194790	219428	+		chr11	8083021	8078098
IV	90.006	PMZ_0004668	scaffold_322	20671	27226	-		chr1	185979656	185979943
IV	90.006	PMZ_0004671	scaffold_322	62025	68797	+		chr11	3437025	3442271
IV	90.006	PMZ_0004675	scaffold_322	181456	196977	-		chr11	20584068	20581429
IV	90.006	PMZ_0004676	scaffold_322	219771	233259	+		chr11	20669200	20688345
IV	90.006	PMZ_0004679	scaffold_322	425281	426516	+		chr11	8405257	8404376
IV	90.006	PMZ_0004673	scaffold_322	78340	83809	-		chr2	123193644	123197696
IV	90.006	PMZ_0004678	scaffold_322	240485	276969	+		chr2	106536426	106545534
IV	90.006	PMZ_0004679	scaffold_322	425281	426516	+		chr20	7753042	7752188
IV	91.795	PMZ_0015798	scaffold_18969	5452	10285	+		chr11	8069837	8068232
IV	91.795	PMZ_0007445	scaffold_1386	168725	181877	-		chr24	5901288	5899151
IV	93.52	PMZ_0018898	scaffold_5773	4125	13838	-		chr20	12052921	12055845
IV	100.547	PMZ_0004364	scaffold_454	173094	173915	-		chr1	53067426	53067998
IV	100.547	PMZ_0001705	scaffold_25060	3835	20495	+		chr11	3381261	3377345
IV	100.547	PMZ_0015644	scaffold_5529	21434	37986	-		chr11	1330881	1332603
IV	100.547	PMZ_0012241	scaffold_1812	64539	73352	-		chr11	6207680	6210991
IV	100.547	PMZ_0004367	scaffold_454	184216	204216	+		chr14	13853521	13876255
IV	100.547	PMZ_0004371	scaffold_454	319344	326064	+		chr14	14315558	14317452
IV	100.547	PMZ_0004374	scaffold_454	347460	353082	-		chr14	2593803	2590503
IV	100.547	PMZ_0004362	scaffold_454	119557	139493	+		chr18	3229188	3208799
IV	100.547	PMZ_0004371	scaffold_454	319344	326064	+		chr18	3360640	3361431
IV	100.547	PMZ_0012241	scaffold_1812	64539	73352	-		chr2	58064611	58062017
IV	100.547	PMZ_0001708	scaffold_25060	447611	493699	+		chr2	92941897	92929634
IV	104.122	PMZ_0006757	scaffold_361	5695	10502	-		chr1	186923641	186920870
IV	104.122	PMZ_0011250	scaffold_710	34684	50528	-		chr11	1726151	1699559
IV	104.122	PMZ_0006889	scaffold_293	49436	59157	+		chr11	1384804	1386024
IV	104.122	PMZ_0006892	scaffold_293	80910	113212	-		chr11	1402168	1389746
IV	104.122	PMZ_0006763	scaffold_361	103817	122385	-		chr11	2053039	2027029
IV	104.122	PMZ_0006760	scaffold_361	37199	52900	+		chr2	92232863	92218660
IV	104.122	PMZ_0006890	scaffold_293	55742	67981	-		chr2	148275893	148262696
IV	104.122	PMZ_0011252	scaffold_710	82393	99356	-		chr2	144158592	144141284
IV	104.122	PMZ_0006893	scaffold_293	118013	130468	-		chr2	67571035	67563098
IV	104.122	PMZ_0006894	scaffold_293	273276	274692	+		chr2	77048382	77048867
IV	104.122	PMZ_0006756	scaffold_361	402	1724	+		chr20	1334693	1335594
IV	104.122	PMZ_0006757	scaffold_361	5695	10502	-		chr20	8715778	8717826
IV	104.122	PMZ_0011249	scaffold_710	10732	33535	-		chr20	1383558	1361478
IV	104.122	PMZ_0011251	scaffold_710	51334	55311	-		chr21	4074832	4074083
IV	104.122	PMZ_0006759	scaffold_361	23548	34486	+		chr8	14012550	14011254
IV	104.122	PMZ_0011251	scaffold_710	51334	55311	-		chr9	15984945	15985784
IV	105.255	PMZ_0023148	scaffold_16013	44	2594	+		chr2	111304338	111304493
IV	105.255	PMZ_0023148	scaffold_16013	44	2594	+		chr20	13801563	13801721
IV	106.388	PMZ_0010509	scaffold_505	1758	9985	+		chr11	11793138	11796487
IV	106.388	PMZ_0010511	scaffold_505	40007	68538	+		chr2	109327538	109321101
IV	106.388	PMZ_0010512	scaffold_505	79650	94154	-		chr2	126252334	126252161
IV	106.388	PMZ_0010510	scaffold_505	18930	39831	-		chr20	13895514	13885357
IV	106.388	PMZ_0010511	scaffold_505	40007	68538	+		chr20	13936726	13940507
IV	118.049	PMZ_0006218	scaffold_262	377	48180	+		chr11	8366890	8401882
IV	118.049	PMZ_0006225	scaffold_262	198864	204467	-		chr11	1326217	1326672
IV	118.049	PMZ_0006227	scaffold_262	299225	308863	-		chr11	8901247	8901378
IV	118.049	PMZ_0006220	scaffold_262	58315	67474	-		chr2	69551629	69570441
IV	118.049	PMZ_0006222	scaffold_262	156865	177626	+		chr2	69520973	69478506
IV	118.049	PMZ_0006223	scaffold_262	179997	187029	+		chr2	44495731	44494487
IV	138.898	PMZ_0010800	scaffold_1045	33109	42458	-		chr11	685701	696316
IV	138.898	PMZ_0010799	scaffold_1045	21436	22499	+		chr2	127890397	127892940
IV	138.898	PMZ_0010798	scaffold_1045	8072	14914	+		chr20	1074085	1077081
IV	138.898	PMZ_0010800	scaffold_1045	33109	42458	-		chr20	1082672	1088165
IV	138.898	PMZ_0010801	scaffold_1045	88867	108949	+		chr24	515041	498461
IV	138.898	PMZ_0010801	scaffold_1045	88867	108949	+		chr25	1386385	1387679
IV	168.39	PMZ_0021914	scaffold_12046	1086	8185	-		chr19	5372216	5372407
V	5.192	PMZ_0006514	scaffold_249	65728	96109	+		chr13	16110951	16098876
V	5.192	PMZ_0006519	scaffold_249	164545	250514	-		chr22	393594	401829
V	5.192	PMZ_0006515	scaffold_249	97477	99710	+		chr4	59680085	59678126
V	5.192	PMZ_0006520	scaffold_249	270733	291070	+		chr6	19837773	19819105
V	6.935	PMZ_0009597	scaffold_1540	27397	40655	+		chr6	3766686	3767210
V	6.935	PMZ_0009598	scaffold_1540	39501	49074	-		chr6	3782887	3780464
V	6.935	PMZ_0002871	scaffold_55	471061	486140	-		chr6	12328448	12314273
V	6.935	PMZ_0002872	scaffold_55	492746	496867	-		chr6	12332747	12332376
V	8.66	PMZ_0005765	scaffold_443	339787	347327	-		chr12	2823881	2827943
V	8.66	PMZ_0005756	scaffold_443	24172	27169	-		chr22	283777	288281
V	8.66	PMZ_0005760	scaffold_443	251537	260735	+		chr22	425589	426593
V	8.66	PMZ_0005762	scaffold_443	276007	282378	+		chr22	430059	431247
V	8.66	PMZ_0005763	scaffold_443	291980	311032	-		chr22	51212	64289
V	8.66	PMZ_0005754	scaffold_443	6801	12241	+		chr4	46769816	46771587
V	8.66	PMZ_0005758	scaffold_443	71333	76452	-		chr4	46914393	46914584
V	8.66	PMZ_0005757	scaffold_443	52702	63612	+		chr6	19052847	19058999
V	8.66	PMZ_0005758	scaffold_443	71333	76452	-		chr6	19107035	19106844
V	9.522	PMZ_0002027	scaffold_779	399477	407334	-		chr13	13141852	13151955
V	9.522	PMZ_0002029	scaffold_779	447945	452781	-		chr22	341132	343692
V	9.522	PMZ_0002030	scaffold_779	453029	474235	+		chr22	329687	321803
V	9.522	PMZ_0015714	scaffold_5003	7190	21357	+		chr4	48423230	48428647
V	9.522	PMZ_0002024	scaffold_779	350510	358112	+		chr4	59555104	59558433
V	9.522	PMZ_0002031	scaffold_779	526395	570613	-		chr4	48376266	48419327
V	9.522	PMZ_0002035	scaffold_779	618981	632736	-		chr4	48340826	48352040
V	9.522	PMZ_0002038	scaffold_779	784431	788088	-		chr5	18748022	18745182
V	9.522	PMZ_0015713	scaffold_5003	2907	5529	-		chr6	19601719	19600994
V	9.522	PMZ_0002021	scaffold_779	156659	174744	+		chr6	17967661	17967798
V	9.522	PMZ_0002023	scaffold_779	283464	291171	-		chr6	13082589	13070886
V	9.522	PMZ_0002037	scaffold_779	680843	699894	+		chr8	27122603	27122052
V	10.385	PMZ_0011151	scaffold_805	49238	59431	+		chr13	14084019	14087707
V	10.385	PMZ_0011150	scaffold_805	40936	47639	+		chr22	121382	126420
V	10.385	PMZ_0017693	scaffold_4390	648	8156	+		chr4	35741994	35745776
V	29.812	PMZ_0019221	scaffold_10276	9277	18040	-		chr6	28946341	28939965
V	31.537	PMZ_0008928	scaffold_252	3852	11235	-		chr22_random	37644	29785
V	31.537	PMZ_0008931	scaffold_252	72809	85025	-		chr6	12021700	12023384
V	34.762	PMZ_0018079	scaffold_4786	1478	2592	+		chr13	1430747	1430944
V	34.762	PMZ_0018079	scaffold_4786	1478	2592	+		chr22_random	25764	25579
V	34.762	PMZ_0018079	scaffold_4786	1478	2592	+		chr4	51832098	51832274
V	40.525	PMZ_0000839	scaffold_529	1336797	1353306	-		chr1	199241429	199243824
V	40.525	PMZ_0000838	scaffold_529	1324337	1331753	-		chr13	16052593	16051784
V	40.525	PMZ_0000839	scaffold_529	1336797	1353306	-		chr13	13054742	13057901
V	40.525	PMZ_0000839	scaffold_529	1336797	1353306	-		chr4	54095286	54090585
V	57.377	PMZ_0006957	scaffold_126	114237	121017	-		chr1	198484229	198485157
V	57.377	PMZ_0006958	scaffold_126	122779	124110	-		chr1	198477550	198477723
V	57.377	PMZ_0006962	scaffold_126	160553	188970	+		chr13	17193497	17175436
V	57.377	PMZ_0015067	scaffold_2357	2484	40172	+		chr4	41180780	41161783
V	57.377	PMZ_0008050	scaffold_1115	32727	37749	+		chr4	40910326	40910451
V	57.377	PMZ_0006952	scaffold_126	33533	44689	+		chr4	41033604	41025593
V	57.377	PMZ_0006962	scaffold_126	160553	188970	+		chr4	40844219	40870308
V	57.377	PMZ_0008050	scaffold_1115	32727	37749	+		chr6	28984009	28984134
V	57.377	PMZ_0006962	scaffold_126	160553	188970	+		chr6	28174902	28183512
V	57.377	PMZ_0006963	scaffold_126	203050	218967	+		chr6	28196099	28189719
V	57.377	PMZ_0006953	scaffold_126	58968	80078	-		chrZ	65620067	65633080
V	57.377	PMZ_0006955	scaffold_126	91087	94417	-		chrZ	9450493	9450074
V	60.344	PMZ_0006718	scaffold_244	16669	53675	-		chr6	17243949	17258671
V	60.344	PMZ_0006719	scaffold_244	231895	259256	+		chr6	17810149	17809973
V	79.593	PMZ_0004418	scaffold_220	296155	303048	+		chr4	62973662	62973480
V	79.593	PMZ_0004421	scaffold_220	321745	333343	+		chr4	62958422	62957433
V	79.593	PMZ_0004422	scaffold_220	350166	359549	+		chr4	62934897	62933932
V	79.593	PMZ_0004423	scaffold_220	369186	389521	+		chr4	62917871	62913244
V	79.593	PMZ_0004424	scaffold_220	404463	412999	+		chr4	62905714	62897311
V	79.593	PMZ_0004420	scaffold_220	316755	321114	+		chr6	17501785	17501958
V	79.593	PMZ_0004423	scaffold_220	369186	389521	+		chr6	17527829	17538248
V	79.593	PMZ_0004424	scaffold_220	404463	412999	+		chr6	17554578	17564197
V	79.593	PMZ_0004426	scaffold_220	447848	455902	+		chr6	17285901	17278939
V	81.318	PMZ_0018362	scaffold_5090	7507	12961	+		chr13	14714724	14713822
V	81.318	PMZ_0010571	scaffold_839	88755	113140	-		chr2	44348239	44358467
V	81.318	PMZ_0009513	scaffold_525	168556	174959	+		chr20	9716015	9719980
V	81.318	PMZ_0018362	scaffold_5090	7507	12961	+		chr4	24463227	24462204
V	81.318	PMZ_0009511	scaffold_525	37011	91496	-		chr4	35946693	35903598
V	81.318	PMZ_0007698	scaffold_620	67286	94515	+		chr4	26265608	26284278
V	81.318	PMZ_0010570	scaffold_839	70229	72617	+		chr4	26165085	26165276
V	81.318	PMZ_0007697	scaffold_620	9499	27870	+		chr6	11604230	11607615
V	81.318	PMZ_0010570	scaffold_839	70229	72617	+		chr6	11598934	11599119
V	81.318	PMZ_0010571	scaffold_839	88755	113140	-		chrZ	35552099	35567406
V	83.042	PMZ_0003672	scaffold_280	50189	74402	-		chr2	48620441	48620268
V	83.042	PMZ_0003676	scaffold_280	254938	270823	-		chr4	60178516	60175112
V	83.042	PMZ_0003681	scaffold_280	517326	519439	+		chr5	52007159	52006860
V	83.042	PMZ_0003676	scaffold_280	254938	270823	-		chr6	12869700	12871112
V	83.042	PMZ_0003677	scaffold_280	278180	280138	-		chr6	12867363	12868109
V	83.042	PMZ_0003679	scaffold_280	300778	311871	-		chr6	12859218	12865132
V	83.042	PMZ_0003672	scaffold_280	50189	74402	-		chr7	15278273	15278100
V	83.042	PMZ_0003673	scaffold_280	133205	134500	+		chr7	15350851	15351639
V	88.217	PMZ_0007831	scaffold_258	446	11585	-		chr16	151225	159500
V	111.624	PMZ_0002450	scaffold_4	184921	216266	+		chr4	60214904	60175112
V	122.505	PMZ_0018743	scaffold_5553	4275	17422	+		chr3	66417348	66421004
V	124.23	PMZ_0007629	scaffold_1432	2994	9515	-		chr1	49779506	49791721
V	124.23	PMZ_0007632	scaffold_1432	25764	28613	-		chr1	75799287	75800240
V	124.23	PMZ_0007634	scaffold_1432	67011	83099	+		chr4	21405403	21404696
V	124.23	PMZ_0007635	scaffold_1432	179252	192200	-		chr4	23274912	23295339
V	124.23	PMZ_0007631	scaffold_1432	21622	24088	+		chrZ	7105334	7108722
V	127.679	PMZ_0015592	scaffold_3212	9225	14743	-		chr6	7695611	7696117
V	127.679	PMZ_0015593	scaffold_3212	18500	35309	-		chr6	7650848	7675880
V	128.546	PMZ_0009159	scaffold_662	3513	7684	-		chr13	16850526	16851746
V	128.546	PMZ_0009161	scaffold_662	115852	136540	+		chr22	2822645	2834925
V	128.546	PMZ_0009163	scaffold_662	154088	166223	-		chr26	3924112	3921043
V	128.546	PMZ_0009159	scaffold_662	3513	7684	-		chr4	23931832	23929470
V	128.546	PMZ_0005112	scaffold_946	222607	235787	+		chr6	13037109	13034919
V	128.546	PMZ_0005114	scaffold_946	390363	396866	+		chr6	14215787	14215182
V	128.546	PMZ_0009162	scaffold_662	132926	139357	-		chrZ	48954445	48956056
V	129.413	PMZ_0005810	scaffold_172	34664	53253	+		chr22	3920805	3934259
V	129.413	PMZ_0005811	scaffold_172	69757	78620	+		chr4	55612477	55612809
V	129.413	PMZ_0005812	scaffold_172	93423	103011	+		chr4	55628018	55628299
V	129.413	PMZ_0005809	scaffold_172	13592	44039	-		chr6	17858980	17859504
V	129.413	PMZ_0005813	scaffold_172	232530	245928	-		chr6	1764820	1755772
V	131.134	PMZ_0014842	scaffold_3099	644	9139	+		chr3	101826076	101803706
V	138.162	PMZ_0010389	scaffold_1093	247	12804	-		chr1	10263869	10280385
V	138.162	PMZ_0010392	scaffold_1093	50377	73689	-		chr1	9577385	9603956
V	138.162	PMZ_0010389	scaffold_1093	247	12804	-		chr12	2949418	2947312
V	138.162	PMZ_0010393	scaffold_1093	63070	93675	+		chr4	37923414	37923701
V	138.162	PMZ_0010393	scaffold_1093	63070	93675	+		chr6	2947391	2947095
V	138.162	PMZ_0010394	scaffold_1093	95843	96996	+		chr6	2872263	2872075
V	148.894	PMZ_0004182	scaffold_1102	66036	75201	-		chr1	74004657	73998658
V	148.894	PMZ_0004184	scaffold_1102	97407	97937	-		chr1	74114306	74113872
V	148.894	PMZ_0004187	scaffold_1102	253834	265394	+		chr11	2479513	2482407
V	148.894	PMZ_0004539	scaffold_223	34126	40286	+		chr22	2293970	2293803
V	148.894	PMZ_0004183	scaffold_1102	91629	93130	-		chr26	3041846	3042439
V	148.894	PMZ_0004541	scaffold_223	57824	61807	-		chr4	51994660	51988607
V	148.894	PMZ_0004182	scaffold_1102	66036	75201	-		chr5	17616940	17638103
V	148.894	PMZ_0004186	scaffold_1102	109196	125327	+		chr5	20399078	20402164
V	148.894	PMZ_0004191	scaffold_1102	472842	497175	+		chr5	25549072	25582053
V	148.894	PMZ_0004538	scaffold_223	6257	14603	+		chr6	9827459	9824586
V	148.894	PMZ_0004540	scaffold_223	45272	55059	-		chr6	12640679	12641128
V	148.894	PMZ_0004541	scaffold_223	57824	61807	-		chr6	12638707	12639810
V	148.894	PMZ_0004543	scaffold_223	168193	174711	-		chr6	12615756	12618477
V	148.894	PMZ_0004544	scaffold_223	175467	182378	-		chr6	12613685	12614674
V	148.894	PMZ_0004545	scaffold_223	186572	202045	-		chr6	12607055	12610459
V	153.355	PMZ_0020727	scaffold_8613	741	10396	-		chr13	13926742	13939793
V	153.355	PMZ_0020727	scaffold_8613	741	10396	-		chr4	52002895	51996560
V	153.355	PMZ_0020727	scaffold_8613	741	10396	-		chr6	12635050	12638334
V	156.104	PMZ_0009426	scaffold_4072	3770	3982	+		chr13	13903642	13903740
V	156.104	PMZ_0009426	scaffold_4072	3770	3982	+		chr4	52016016	52015918
V	156.104	PMZ_0009426	scaffold_4072	3770	3982	+		chr6	12629580	12629678
V	160.301	PMZ_0012004	scaffold_952	48514	55776	+		chr13	13134736	13134045
V	160.301	PMZ_0011302	scaffold_2415	1154	18026	+		chr4	56206242	56236826
V	160.301	PMZ_0011303	scaffold_2415	19273	22997	+		chr4	56238868	56244474
V	160.301	PMZ_0011304	scaffold_2415	26458	32054	+		chr4	56247393	56250928
V	160.301	PMZ_0012003	scaffold_952	31225	43234	+		chr4	58301417	58300644
V	160.301	PMZ_0012837	scaffold_1254	57967	67361	+		chr4	58372086	58348977
V	160.301	PMZ_0012002	scaffold_952	756	31067	+		chr6	10134048	10152132
V	160.301	PMZ_0012005	scaffold_952	56737	70121	-		chr6	18489085	18487636
V	160.301	PMZ_0011306	scaffold_2415	70369	81661	+		chr6	12918409	12920467
V	166.694	PMZ_0003910	scaffold_452	61357	73826	+		chr3	35493659	35495173
V	166.694	PMZ_0003920	scaffold_452	358463	378457	-		chr4	59878022	59883889
V	166.694	PMZ_0003906	scaffold_452	2096	14072	+		chr6	12965719	12973988
V	166.694	PMZ_0003911	scaffold_452	79377	86525	+		chr6	12979623	12981124
V	166.694	PMZ_0003914	scaffold_452	94090	102817	+		chr6	13000264	13004510
V	166.694	PMZ_0003918	scaffold_452	261911	266825	-		chr6	3574153	3581229
V	166.694	PMZ_0003920	scaffold_452	358463	378457	-		chr6	3489352	3495375
V	166.694	PMZ_0003921	scaffold_452	389512	394881	-		chr6	3443489	3443668
V	166.694	PMZ_0003922	scaffold_452	483502	506269	-		chr6	3351466	3357123
VI	0	PMZ_0005524	scaffold_4320	31332	50160	-		chr19	646018	647286
VI	0	PMZ_0005528	scaffold_4320	202534	218755	-		chr28	1158696	1165270
VI	0	PMZ_0005526	scaffold_4320	63784	77253	-		chr7	16716982	16720125
VI	3.45	PMZ_0007451	scaffold_369	117233	133881	-		chr1	113550437	113550873
VI	3.45	PMZ_0007451	scaffold_369	117233	133881	-		chr2	20263689	20266148
VI	3.45	PMZ_0005079	scaffold_324	178529	222326	+		chr2	5680477	5662241
VI	3.45	PMZ_0007452	scaffold_369	179377	186205	-		chr2	20225974	20227631
VI	3.45	PMZ_0007453	scaffold_369	188002	197684	-		chr2	14924773	14914171
VI	3.45	PMZ_0005080	scaffold_324	236229	265348	+		chr2	14129771	14135723
VI	3.45	PMZ_0011461	scaffold_1316	16026	47188	-		chr7	4121445	4135724
VI	3.45	PMZ_0005079	scaffold_324	178529	222326	+		chr7	36159276	36182046
VI	3.45	PMZ_0005081	scaffold_324	283040	300830	+		chr7	36445657	36460225
VI	3.45	PMZ_0007450	scaffold_369	58041	97463	-		chr8	21090275	21093451
VI	3.45	PMZ_0007448	scaffold_369	30333	41386	-		chrZ	68722097	68713071
VI	8.624	PMZ_0010635	scaffold_509	10915	42488	+		chr2	23566105	23568951
VI	8.624	PMZ_0010637	scaffold_509	81314	113582	-		chr2	28808194	28820185
VI	8.624	PMZ_0010634	scaffold_509	2463	40619	-		chr7	568748	568915
VI	8.624	PMZ_0010635	scaffold_509	10915	42488	+		chr7	552966	557800
VI	8.624	PMZ_0010636	scaffold_509	62366	68335	+		chr7	1061490	1068577
VI	8.624	PMZ_0010637	scaffold_509	81314	113582	-		chr7	6594363	6598226
VI	8.624	PMZ_0008725	scaffold_648	102751	121877	+		chr7	5776838	5788694
VI	10.349	PMZ_0022934	scaffold_15007	444	5328	+		chr7	62123	61458
VI	12.074	PMZ_0013733	scaffold_1649	10319	30940	+		chr27	4560448	4553767
VI	12.074	PMZ_0013733	scaffold_1649	10319	30940	+		chr7	8897517	8882158
VI	12.074	PMZ_0013736	scaffold_1649	45763	52900	-		chr7	8855921	8874366
VI	12.074	PMZ_0013737	scaffold_1649	53882	55685	-		chr7	8853068	8853539
VI	16.815	PMZ_0013024	scaffold_2525	25354	43223	-		chr2	65294545	65299462
VI	16.815	PMZ_0013025	scaffold_2525	51576	58297	+		chr8	3829747	3829416
VI	19.101	PMZ_0016027	scaffold_3088	490	1945	+		chr2	47444672	47444478
VI	19.101	PMZ_0016028	scaffold_3088	12569	21282	+		chr2	47428206	47428066
VI	19.101	PMZ_0003048	scaffold_289	304707	309206	-		chr3	32180152	32179254
VI	19.101	PMZ_0003052	scaffold_289	408926	423244	+		chr3	18526760	18535289
VI	19.101	PMZ_0003055	scaffold_289	431360	439076	-		chr3	31436517	31444561
VI	19.101	PMZ_0003056	scaffold_289	440069	443086	-		chr3	31434099	31435915
VI	19.101	PMZ_0003058	scaffold_289	448124	465825	+		chr3	19936364	19944254
VI	19.101	PMZ_0003059	scaffold_289	470221	471569	+		chr3	19952873	19956285
VI	19.101	PMZ_0003060	scaffold_289	473507	496997	+		chr3	19956919	19978421
VI	19.101	PMZ_0003046	scaffold_289	251617	259881	-		chr5	51072837	51061958
VI	19.101	PMZ_0003064	scaffold_289	583834	602591	+		chr5	61418386	61409693
VI	19.101	PMZ_0003066	scaffold_289	622706	626582	-		chr5	28313205	28314285
VI	22.551	PMZ_0003971	scaffold_21	267738	269183	-		chr2	43777330	43777485
VI	22.551	PMZ_0003972	scaffold_21	316361	325371	+		chr2	43702418	43695187
VI	22.551	PMZ_0003974	scaffold_21	331385	356791	+		chr2	43659989	43640301
VI	22.551	PMZ_0003976	scaffold_21	400518	415236	-		chr2	43472320	43479305
VI	22.551	PMZ_0003977	scaffold_21	477672	487319	+		chr2	44545237	44545025
VI	22.551	PMZ_0003979	scaffold_21	510224	517087	-		chr2	44501337	44505180
VI	22.551	PMZ_0003968	scaffold_21	31567	60009	+		chr27	3178205	3190150
VI	23.413	PMZ_0015195	scaffold_2468	38223	41190	-		chr15	3446821	3445859
VI	23.413	PMZ_0015195	scaffold_2468	38223	41190	-		chr2	22083158	22084198
VI	23.413	PMZ_0015194	scaffold_2468	6741	14643	+		chr7	13266879	13257313
VI	23.413	PMZ_0015195	scaffold_2468	38223	41190	-		chr7	12742964	12743992
VI	26	PMZ_0005253	scaffold_471	23687	55965	-		chr7	14660475	14669449
VI	27.725	PMZ_0005025	scaffold_40	1390	8023	-		chr1	95662378	95659601
VI	27.725	PMZ_0005029	scaffold_40	289289	304545	+		chr2	11718268	11713034
VI	27.725	PMZ_0005028	scaffold_40	73049	92571	-		chr27	1501112	1500843
VI	27.725	PMZ_0005026	scaffold_40	24676	29755	-		chr7	13159855	13160016
VI	27.725	PMZ_0005027	scaffold_40	38911	64032	-		chr7	13108918	13130891
VI	32.899	PMZ_0000367	scaffold_1004	479036	479842	-		chr10	3491425	3491604
VI	32.899	PMZ_0000358	scaffold_1004	184821	212965	+		chr11	21790490	21795896
VI	32.899	PMZ_0000357	scaffold_1004	174692	183794	-		chr2	43476803	43479305
VI	32.899	PMZ_0000359	scaffold_1004	218092	238211	-		chr2	43474518	43476710
VI	32.899	PMZ_0000393	scaffold_1004	2101326	2101829	+		chr2	38215145	38215444
VI	33.877	PMZ_0007979	scaffold_200	138790	141194	+		chr1	95782362	95781379
VI	33.877	PMZ_0007979	scaffold_200	138790	141194	+		chr23	4771001	4770273
VI	33.877	PMZ_0007979	scaffold_200	138790	141194	+		chr27	1230711	1229752
VI	33.877	PMZ_0007979	scaffold_200	138790	141194	+		chr3	64411435	64410713
VI	33.877	PMZ_0007980	scaffold_200	157510	176885	+		chr7	27094225	27100716
VI	34.595	PMZ_0012971	scaffold_1354	15847	62441	+		chr2	6242428	6233921
VI	36.329	PMZ_0011724	scaffold_1747	12927	14664	+		chr1	34759979	34760107
VI	36.329	PMZ_0011725	scaffold_1747	27971	35651	+		chr1	1075258	1078705
VI	36.329	PMZ_0011724	scaffold_1747	12927	14664	+		chr12	2667004	2666873
VI	36.329	PMZ_0011728	scaffold_1747	48773	86547	+		chr2	8551008	8576923
VI	36.329	PMZ_0011725	scaffold_1747	27971	35651	+		chr26	520707	525912
VI	36.329	PMZ_0011725	scaffold_1747	27971	35651	+		chr7	23761321	23763356
VI	36.329	PMZ_0011726	scaffold_1747	34228	35196	-		chr7	23757034	23756174
VI	36.329	PMZ_0011727	scaffold_1747	36956	42151	-		chr7	23876611	23877305
VI	38.893	PMZ_0011348	scaffold_749	14345	22394	-		chr2	7659429	7660909
VI	38.893	PMZ_0011349	scaffold_749	56320	90936	-		chr2	7611792	7608476
VI	39.758	PMZ_0011133	scaffold_660	1772	10614	+		chr2	22450516	22443174
VI	39.758	PMZ_0011134	scaffold_660	14188	27691	-		chr2	22436928	22437158
VI	39.758	PMZ_0002213	scaffold_408	20161	41594	-		chr2	7988539	7988721
VI	39.758	PMZ_0011139	scaffold_660	68092	92211	-		chr2	22382521	22383711
VI	39.758	PMZ_0002220	scaffold_408	251678	256035	-		chr2	8383042	8382860
VI	39.758	PMZ_0002223	scaffold_408	318237	335664	-		chr2	8427213	8427073
VI	39.758	PMZ_0002224	scaffold_408	359296	375962	-		chr2	7778719	7778817
VI	39.758	PMZ_0002225	scaffold_408	526609	556972	-		chr2	7636087	7617246
VI	39.758	PMZ_0011134	scaffold_660	14188	27691	-		chr7	7022695	7022456
VI	39.758	PMZ_0002218	scaffold_408	88333	94118	-		chr7	30116775	30117011
VI	39.758	PMZ_0002224	scaffold_408	359296	375962	-		chr7	30435113	30435015
VI	39.758	PMZ_0002227	scaffold_408	578968	593270	-		chr7	22741849	22744929
VI	41.547	PMZ_0014940	scaffold_2364	5601	23390	-		chr2	22476745	22462700
VI	41.547	PMZ_0014941	scaffold_2364	23579	36372	+		chr3	34889655	34885231
VI	41.547	PMZ_0014939	scaffold_2364	604	2824	+		chr7	6881990	6880576
VI	43.335	PMZ_0006640	scaffold_4808	211810	224348	-		chr1	125916099	125896560
VI	43.335	PMZ_0006639	scaffold_4808	201834	203253	-		chr13	12940363	12940482
VI	43.335	PMZ_0013868	scaffold_1706	17420	54680	+		chr2	38474225	38446825
VI	43.335	PMZ_0010331	scaffold_1867	21364	25300	+		chr2	30940402	30934987
VI	43.335	PMZ_0006636	scaffold_4808	58298	59679	+		chr2	99250464	99248892
VI	43.335	PMZ_0010333	scaffold_1867	60075	80310	-		chr2	37820646	37831107
VI	43.335	PMZ_0010334	scaffold_1867	89598	96089	-		chr2	37764712	37764813
VI	43.335	PMZ_0010331	scaffold_1867	21364	25300	+		chr7	12423915	12411550
VI	50.639	PMZ_0011073	scaffold_775	90682	98616	+		chr17	9722404	9722676
VI	50.639	PMZ_0011072	scaffold_775	5129	54939	-		chr2	241488	222068
VI	50.639	PMZ_0011073	scaffold_775	90682	98616	+		chr8	2520758	2520546
VI	51.501	PMZ_0014611	scaffold_2173	31034	46145	+		chr7	28197448	28157733
VI	52.364	PMZ_0014627	scaffold_2087	3506	34471	+		chr7	26996614	27005666
VI	54.088	PMZ_0014760	scaffold_2289	18761	37684	+		chr2	86496839	86490032
VI	54.088	PMZ_0003579	scaffold_705	254756	266965	+		chr2	82225651	82230180
VI	54.088	PMZ_0003587	scaffold_705	491855	506466	+		chr2	56514752	56525031
VI	54.088	PMZ_0003584	scaffold_705	430313	462256	+		chr27	4021803	4017398
VI	54.088	PMZ_0003574	scaffold_705	14168	45152	+		chr7	32212853	32217849
VI	54.088	PMZ_0003578	scaffold_705	101948	253730	+		chr7	27702683	27659757
VI	54.088	PMZ_0003579	scaffold_705	254756	266965	+		chr7	37939834	37944706
VI	54.088	PMZ_0003581	scaffold_705	302762	313433	+		chr7	27510088	27527717
VI	54.088	PMZ_0003592	scaffold_705	545861	552930	+		chr7	28092100	28092276
VI	61.113	PMZ_0006446	scaffold_1421	46025	48749	+		chr1	82900379	82900281
VI	61.113	PMZ_0006447	scaffold_1421	143983	158076	+		chr1	82837326	82828159
VI	61.113	PMZ_0006449	scaffold_1421	192476	215639	+		chr1	82782295	82779055
VI	61.113	PMZ_0006453	scaffold_1421	280290	285247	-		chr1	177006052	177006255
VI	61.113	PMZ_0006452	scaffold_1421	265227	275006	-		chr2	45958013	45948109
VI	61.113	PMZ_0006453	scaffold_1421	280290	285247	-		chr2	114131639	114131917
VI	61.113	PMZ_0006457	scaffold_1421	295359	301229	+		chr22	401650	407409
VI	61.113	PMZ_0006446	scaffold_1421	46025	48749	+		chr3	49016767	49016868
VI	61.113	PMZ_0006447	scaffold_1421	143983	158076	+		chr3	49053112	49057023
VI	61.113	PMZ_0006448	scaffold_1421	179487	179855	+		chr3	49079897	49080148
VI	61.113	PMZ_0006453	scaffold_1421	280290	285247	-		chr4	13331774	13332022
VI	61.113	PMZ_0006451	scaffold_1421	241495	264274	+		chr7	32154536	32136685
VI	62.838	PMZ_0003341	scaffold_90	132897	148930	-		chr1	7011892	7008009
VI	62.838	PMZ_0003339	scaffold_90	115798	128252	+		chr18	4570071	4566618
VI	62.838	PMZ_0007394	scaffold_327	57807	79737	+		chr2	26349126	26347142
VI	62.838	PMZ_0011418	scaffold_816	60068	93871	+		chr2	13287197	13305023
VI	62.838	PMZ_0003338	scaffold_90	96012	107875	-		chr2	31063636	31064595
VI	62.838	PMZ_0007395	scaffold_327	226532	255754	+		chr2	26268186	26267117
VI	62.838	PMZ_0003342	scaffold_90	283481	305007	-		chr2	35538278	35553849
VI	62.838	PMZ_0003350	scaffold_90	558812	564790	+		chr2	28605084	28601604
VI	62.838	PMZ_0003349	scaffold_90	505337	513107	+		chr27	4722416	4724887
VI	62.838	PMZ_0013695	scaffold_1626	3507	36644	-		chr7	4376422	4371907
VI	62.838	PMZ_0013697	scaffold_1626	38318	54671	-		chr7	4398595	4390588
VI	62.838	PMZ_0011418	scaffold_816	60068	93871	+		chr7_random	69676	48916
VI	62.838	PMZ_0003344	scaffold_90	370943	375237	+		chr7	29809012	29807556
VI	62.838	PMZ_0003348	scaffold_90	480033	480545	-		chr7	6118874	6119053
VI	62.838	PMZ_0003349	scaffold_90	505337	513107	+		chr7	20388458	20384361
VI	62.838	PMZ_0003351	scaffold_90	568845	588365	-		chr7	12352579	12355590
VI	62.838	PMZ_0003346	scaffold_90	434470	435612	-		chr9	5666196	5667838
VI	62.838	PMZ_0003348	scaffold_90	480033	480545	-		chrE22C19W28_E50C23	407637	407458
VI	65.425	PMZ_0011729	scaffold_1211	27125	32615	-		chr2	128743	126091
VI	65.425	PMZ_0011730	scaffold_1211	33677	43842	-		chr2	44486732	44453513
VI	65.425	PMZ_0011731	scaffold_1211	59286	75516	+		chr2	77265443	77278717
VI	65.425	PMZ_0011730	scaffold_1211	33677	43842	-		chr7	23766991	23771513
VI	65.425	PMZ_0011731	scaffold_1211	59286	75516	+		chr7	23568740	23555914
VI	66.287	PMZ_0006533	scaffold_245	40	2341	+		chr1	634647	635612
VI	66.287	PMZ_0017631	scaffold_4322	620	946	-		chr2	35616346	35616591
VI	66.287	PMZ_0006535	scaffold_245	48427	49560	+		chr2	49834039	49837845
VI	66.287	PMZ_0006536	scaffold_245	57456	63162	-		chr2	57054905	57060826
VI	66.287	PMZ_0006537	scaffold_245	63940	84518	-		chr2	56989114	56989464
VI	66.287	PMZ_0006544	scaffold_245	250240	257131	-		chr2	23260736	23258654
VI	66.287	PMZ_0006546	scaffold_245	271345	283243	-		chr2	41563962	41567388
VI	66.287	PMZ_0017631	scaffold_4322	620	946	-		chr27	4503443	4503168
VI	66.287	PMZ_0017632	scaffold_4322	8728	21546	-		chr27	4504522	4503727
VI	66.287	PMZ_0006539	scaffold_245	131473	149065	+		chr27	4351069	4344898
VI	66.287	PMZ_0006540	scaffold_245	158653	174161	+		chr3	35084399	35087749
VI	66.287	PMZ_0006543	scaffold_245	230019	246306	+		chr3	35098644	35098895
VI	66.287	PMZ_0006545	scaffold_245	257617	267755	-		chr7	4831258	4833715
VI	68.012	PMZ_0010725	scaffold_547	309	4047	-		chr2	91139556	91127885
VI	68.012	PMZ_0010726	scaffold_547	4905	78433	-		chr2	78511997	78580364
VI	68.012	PMZ_0008046	scaffold_261	92066	96312	+		chr2	55276244	55290540
VI	68.012	PMZ_0008048	scaffold_261	177119	181590	-		chr2	49287462	49284528
VI	68.012	PMZ_0010729	scaffold_547	117050	119987	-		chr27	1309356	1308804
VI	68.012	PMZ_0008044	scaffold_261	4928	21408	+		chr7	26109089	26103948
VI	68.012	PMZ_0008045	scaffold_261	23322	52526	+		chr7	26088774	26043433
VI	68.012	PMZ_0010728	scaffold_547	93173	112565	+		chr7	119931	112677
VI	68.012	PMZ_0008047	scaffold_261	162342	164313	-		chr7	25310444	25314096
VI	68.012	PMZ_0008049	scaffold_261	184826	189984	-		chr7	25273984	25276103
VI	69.737	PMZ_0006083	scaffold_431	30267	34731	+		chr1	149038139	149040309
VI	69.737	PMZ_0006084	scaffold_431	70129	81599	+		chr10	443623	433547
VI	69.737	PMZ_0007805	scaffold_297	211410	215099	-		chr2	36242385	36242284
VI	69.737	PMZ_0003334	scaffold_93	457002	470386	-		chr2	55865618	55865764
VI	69.737	PMZ_0006086	scaffold_431	139440	156653	+		chr27	2487153	2510471
VI	69.737	PMZ_0007804	scaffold_297	193368	205463	-		chr27	4412956	4411575
VI	69.737	PMZ_0006081	scaffold_431	14443	15703	+		chr7	27973306	27973398
VI	69.737	PMZ_0006083	scaffold_431	30267	34731	+		chr7	28006574	28008429
VI	69.737	PMZ_0007801	scaffold_297	44366	53345	+		chr7	16641678	16633682
VI	69.737	PMZ_0006086	scaffold_431	139440	156653	+		chr7	38141087	38146686
VI	69.737	PMZ_0006088	scaffold_431	206665	216803	+		chr7	38149292	38164090
VI	69.737	PMZ_0007805	scaffold_297	211410	215099	-		chr7	16067972	16068070
VI	69.737	PMZ_0003329	scaffold_93	414622	420316	+		chr7	24789421	24790015
VI	69.737	PMZ_0006089	scaffold_431	291326	305343	-		chr8	6473861	6472257
VI	70.6	PMZ_0009941	scaffold_334	108680	110230	-		chr2	22082693	22084207
VI	70.6	PMZ_0009941	scaffold_334	108680	110230	-		chr7	12742493	12744001
VI	71.462	PMZ_0012930	scaffold_1523	6150	33954	-		chr2	90750214	90731989
VI	73.187	PMZ_0003109	scaffold_108	303340	308238	-		chr14	14655521	14654070
VI	73.187	PMZ_0003113	scaffold_108	413818	420807	-		chr15	7405847	7406655
VI	73.187	PMZ_0016240	scaffold_3152	4885	22711	+		chr2	28392188	28391922
VI	73.187	PMZ_0012700	scaffold_1223	5231	27734	+		chr2	90655055	90672824
VI	73.187	PMZ_0003100	scaffold_108	28501	38614	-		chr2	33975870	33979048
VI	73.187	PMZ_0012148	scaffold_1742	37290	70584	-		chr2	26791552	26792037
VI	73.187	PMZ_0003101	scaffold_108	44578	66491	-		chr2	51648058	51662312
VI	73.187	PMZ_0006317	scaffold_8148	166546	184250	+		chr2	33969240	33951145
VI	73.187	PMZ_0003103	scaffold_108	185533	196285	+		chr2	34744828	34721209
VI	73.187	PMZ_0003105	scaffold_108	248648	251656	-		chr2	34264496	34267254
VI	73.187	PMZ_0006323	scaffold_8148	251538	284868	+		chr2	34014581	33997959
VI	73.187	PMZ_0003112	scaffold_108	405174	413612	+		chr2	90199386	90230070
VI	73.187	PMZ_0003117	scaffold_108	520935	537373	+		chr2	57156730	57170883
VI	73.187	PMZ_0003118	scaffold_108	553925	555790	+		chr2	57177253	57180866
VI	73.187	PMZ_0006320	scaffold_8148	203023	207404	+		chr4	75974050	75973221
VI	73.187	PMZ_0006316	scaffold_8148	43	10976	+		chr7	14955234	14962215
VI	73.187	PMZ_0003095	scaffold_108	5277	12533	+		chr7	11045593	11039541
VI	73.187	PMZ_0012148	scaffold_1742	37290	70584	-		chr7	5711713	5711228
VI	73.187	PMZ_0012150	scaffold_1742	64171	79386	+		chr7	14911902	14939616
VI	73.187	PMZ_0003104	scaffold_108	224816	228250	-		chr7	11240067	11247880
VI	73.187	PMZ_0003107	scaffold_108	269768	274422	-		chr7	11207216	11213803
VI	73.187	PMZ_0003108	scaffold_108	276802	295146	+		chr7	11186660	11179418
VI	73.187	PMZ_0003111	scaffold_108	351477	362844	-		chr7	20140230	20135686
VI	78.489	PMZ_0014457	scaffold_2054	32624	47749	+		chr7	19341544	19358616
VI	79.352	PMZ_0009644	scaffold_24802	4251	20381	-		chr7	6792506	6788320
VI	80.214	PMZ_0006768	scaffold_24864	35898	58135	-		chr2	4282114	4262299
VI	80.214	PMZ_0006771	scaffold_24864	91990	102032	-		chr7	2214051	2209410
VI	88.932	PMZ_0005595	scaffold_247	20546	48225	+		chr18	3391820	3388682
VI	88.932	PMZ_0005595	scaffold_247	20546	48225	+		chr2	77048595	77048828
VI	88.932	PMZ_0005595	scaffold_247	20546	48225	+		chr5	35890153	35890401
VI	88.932	PMZ_0005600	scaffold_247	164082	180982	+		chr7	13459886	13465630
VI	91.112	PMZ_0015113	scaffold_24799	384	2253	+		chr2	3350127	3348669
VI	91.112	PMZ_0015113	scaffold_24799	384	2253	+		chr27	2746439	2747230
VI	91.112	PMZ_0015113	scaffold_24799	384	2253	+		chr7	2762446	2760631
VI	93.291	PMZ_0010282	scaffold_682	47792	87094	+		chr2	48463235	48500501
VI	93.291	PMZ_0010282	scaffold_682	47792	87094	+		chr7	15135759	15171605
VI	96.749	PMZ_0005819	scaffold_217	97407	110709	+		chr1	95014302	95007931
VI	96.749	PMZ_0005821	scaffold_217	177182	184793	+		chr2	87878852	87903505
VI	96.749	PMZ_0005822	scaffold_217	242685	243155	+		chr2	21655965	21655708
VI	96.749	PMZ_0005818	scaffold_217	46371	55211	-		chr24	3605488	3594375
VI	96.749	PMZ_0005821	scaffold_217	177182	184793	+		chr7	6681943	6697202
VI	96.749	PMZ_0005822	scaffold_217	242685	243155	+		chr7	13501446	13501219
VI	99.158	PMZ_0010910	scaffold_608	75670	87187	+		chr1	79120633	79120899
VI	99.158	PMZ_0006663	scaffold_235	31104	57364	+		chr2	623858	611372
VI	99.158	PMZ_0006662	scaffold_235	2	28082	+		chr27	2801863	2802330
VI	99.158	PMZ_0006664	scaffold_235	64413	135599	-		chr27	2860096	2857335
VI	99.158	PMZ_0006664	scaffold_235	64413	135599	-		chr7	2537288	2538862
VI	118.705	PMZ_0013490	scaffold_2747	11950	20179	-		chr2	141003760	140995691
VI	118.705	PMZ_0013494	scaffold_2747	44368	47008	-		chr2	18767010	18766774
VI	118.705	PMZ_0021222	scaffold_9794	3051	9761	+		chr27	4009117	4008203
VI	120.194	PMZ_0001712	scaffold_165	151422	154749	-		chr1	53411632	53412168
VI	120.194	PMZ_0001722	scaffold_165	459961	460754	+		chr1	58872800	58874379
VI	120.194	PMZ_0001723	scaffold_165	515067	539643	+		chr1	58875644	58891846
VI	120.194	PMZ_0001726	scaffold_165	574850	577888	+		chr1	59084929	59084723
VI	120.194	PMZ_0001728	scaffold_165	599161	607662	+		chr1	52590031	52589183
VI	120.194	PMZ_0016093	scaffold_15079	27722	31598	+		chr10	6364137	6363136
VI	120.194	PMZ_0001713	scaffold_165	173018	197685	+		chr12	17231052	17220506
VI	120.194	PMZ_0001719	scaffold_165	412036	421136	-		chr12	17104065	17083024
VI	120.194	PMZ_0001721	scaffold_165	446498	454826	-		chr12	4810645	4799890
VI	120.194	PMZ_0001712	scaffold_165	151422	154749	-		chr14	5613997	5614542
VI	120.194	PMZ_0001714	scaffold_165	210388	220095	-		chr14	2287214	2283314
VI	120.194	PMZ_0001716	scaffold_165	308065	309258	+		chr14	2337593	2338540
VI	120.194	PMZ_0001718	scaffold_165	396503	410034	+		chr14	4371806	4373183
VI	120.194	PMZ_0001712	scaffold_165	151422	154749	-		chr18	9716349	9715813
VI	120.194	PMZ_0001720	scaffold_165	425726	440712	+		chr2	57079135	57103882
VI	120.194	PMZ_0001725	scaffold_165	565961	571315	-		chr26	3597634	3599625
VI	120.194	PMZ_0001733	scaffold_165	820342	820728	+		chr27	2203866	2203675
VI	120.194	PMZ_0001717	scaffold_165	322557	327295	+		chr7	37906158	37896249
VI	120.194	PMZ_0001720	scaffold_165	425726	440712	+		chr7	37880733	37870822
VI	120.194	PMZ_0001731	scaffold_165	741896	774078	-		chr7	37305134	37315393
VI	120.194	PMZ_0016093	scaffold_15079	27722	31598	+		chrZ	36935144	36936151
VI	122.344	PMZ_0011445	scaffold_1214	3195	6888	+		chr2	330077	331139
VI	122.344	PMZ_0012718	scaffold_1227	12726	26777	+		chr2	5680459	5662241
VI	122.344	PMZ_0011449	scaffold_1214	25492	36171	+		chr2	334342	334515
VI	122.344	PMZ_0016078	scaffold_3557	30399	34856	-		chr2	14242232	14244511
VI	122.344	PMZ_0012720	scaffold_1227	33682	63402	+		chr2	14119765	14145628
VI	122.344	PMZ_0015517	scaffold_3867	12041	28451	+		chr23	1423870	1421153
VI	122.344	PMZ_0015516	scaffold_3867	783	5335	-		chr3	58735365	58736953
VI	122.344	PMZ_0016077	scaffold_3557	192	10057	+		chr7	34945411	34943126
VI	122.344	PMZ_0014798	scaffold_2240	3802	23789	-		chr7	5122984	5140415
VI	122.344	PMZ_0012718	scaffold_1227	12726	26777	+		chr7	36159294	36182046
VI	122.344	PMZ_0014800	scaffold_2240	33455	39700	+		chr7	5017103	5016411
VI	122.344	PMZ_0012720	scaffold_1227	33682	63402	+		chr7	36402183	36460183
VI	124.056	PMZ_0016369	scaffold_3249	16861	32948	+		chr7	37126719	37157289
VI	124.335	PMZ_0005373	scaffold_136	132824	134276	+		chr13	14714796	14713924
VI	124.335	PMZ_0005367	scaffold_136	1101	35988	+		chr7	33301369	33230245
VI	124.335	PMZ_0005372	scaffold_136	129903	130946	-		chr7	33575223	33575032
VI	124.335	PMZ_0005377	scaffold_136	234008	234986	-		chr7	20275647	20275862
VII	0.256	PMZ_0006809	scaffold_418	270	31713	+		chr1	149360244	149338186
VII	0.256	PMZ_0006811	scaffold_418	210147	216327	+		chr1	149167896	149162716
VII	0.256	PMZ_0006817	scaffold_418	249035	261272	+		chr1	149116355	149115838
VII	0.256	PMZ_0006811	scaffold_418	210147	216327	+		chr4	3455279	3453491
VII	0.256	PMZ_0006814	scaffold_418	232159	233550	+		chr9	6106251	6107423
VII	0.256	PMZ_0006817	scaffold_418	249035	261272	+		chr9	6115708	6116734
VII	0.256	PMZ_0006818	scaffold_418	264762	280327	-		chr9	6131300	6122534
VII	10.044	PMZ_0021729	scaffold_10967	75	8390	+		chr1	129019321	129016701
VII	10.044	PMZ_0007598	scaffold_503	18312	23138	-		chr1	144387961	144387116
VII	10.044	PMZ_0007600	scaffold_503	30773	60784	-		chr1	189829169	189792899
VII	10.044	PMZ_0007608	scaffold_503	240252	245091	-		chr1	121789144	121789293
VII	10.044	PMZ_0007605	scaffold_503	212209	221578	-		chr10	4554468	4555157
VII	10.044	PMZ_0007605	scaffold_503	212209	221578	-		chr3	107877828	107877133
VII	10.044	PMZ_0007596	scaffold_503	2357	8680	+		chr4	18844370	18834557
VII	10.044	PMZ_0007604	scaffold_503	168153	211422	+		chr4	50671418	50651695
VII	10.044	PMZ_0007599	scaffold_503	27032	29753	+		chr6	23671900	23672922
VII	10.044	PMZ_0021729	scaffold_10967	75	8390	+		chr9	19380171	19381433
VII	10.044	PMZ_0007596	scaffold_503	2357	8680	+		chr9	18256176	18247500
VII	10.044	PMZ_0007600	scaffold_503	30773	60784	-		chr9	5500120	5502493
VII	19.485	PMZ_0002814	scaffold_2897	56153	58712	+		chr1	141614563	141607223
VII	19.485	PMZ_0010188	scaffold_1310	96462	104072	+		chr1	79824556	79825440
VII	19.485	PMZ_0003442	scaffold_37	246793	258899	-		chr1	131016869	131025727
VII	19.485	PMZ_0002817	scaffold_2897	259314	264796	-		chr1	141531460	141532127
VII	19.485	PMZ_0002821	scaffold_2897	301607	308474	+		chr1	141546241	141545783
VII	19.485	PMZ_0002830	scaffold_2897	455332	461378	-		chr1	170165951	170168869
VII	19.485	PMZ_0003449	scaffold_37	542034	557417	-		chr1	130960658	130960816
VII	19.485	PMZ_0002810	scaffold_2897	4708	17677	-		chr17	8916970	8915023
VII	19.485	PMZ_0002815	scaffold_2897	238228	246454	+		chr18	9725201	9726003
VII	19.485	PMZ_0003437	scaffold_37	1044	17618	-		chr2	104076347	104089937
VII	19.485	PMZ_0003438	scaffold_37	20290	100290	-		chr2	104050139	104065148
VII	19.485	PMZ_0003446	scaffold_37	298066	395066	-		chr23	5041415	5070444
VII	19.485	PMZ_0003447	scaffold_37	464865	471904	-		chr23	4994940	5002077
VII	19.485	PMZ_0003438	scaffold_37	20290	100290	-		chr3	93611806	93590900
VII	19.485	PMZ_0003441	scaffold_37	134257	212421	-		chr3	92866944	92933053
VII	19.485	PMZ_0003447	scaffold_37	464865	471904	-		chr3	92498967	92518422
VII	19.485	PMZ_0002820	scaffold_2897	288732	295116	-		chr4	16574348	16573114
VII	19.485	PMZ_0002825	scaffold_2897	425913	426847	-		chr4	30423876	30424666
VII	19.485	PMZ_0002828	scaffold_2897	439811	445368	-		chr4	30410639	30412238
VII	19.485	PMZ_0002830	scaffold_2897	455332	461378	-		chr4	30407160	30408903
VII	19.485	PMZ_0003449	scaffold_37	542034	557417	-		chr4	2315462	2315304
VII	19.485	PMZ_0002810	scaffold_2897	4708	17677	-		chr8	2790947	2797239
VII	19.485	PMZ_0010184	scaffold_1310	57368	59167	-		chr9	16105447	16104332
VII	19.485	PMZ_0010185	scaffold_1310	62879	70281	-		chr9	16113999	16106016
VII	19.485	PMZ_0003442	scaffold_37	246793	258899	-		chr9	20189614	20187373
VII	19.485	PMZ_0002817	scaffold_2897	259314	264796	-		chr9	11406334	11408610
VII	19.485	PMZ_0002818	scaffold_2897	281985	285227	-		chr9	11352262	11368118
VII	19.485	PMZ_0002819	scaffold_2897	285525	285791	-		chr9	11352106	11352261
VII	19.485	PMZ_0002821	scaffold_2897	301607	308474	+		chr9	11438315	11437552
VII	19.485	PMZ_0002822	scaffold_2897	329417	330137	-		chr9	21091562	21091696
VII	19.485	PMZ_0002823	scaffold_2897	330789	345313	-		chr9	21075589	21089063
VII	19.485	PMZ_0003449	scaffold_37	542034	557417	-		chr9	20397955	20397800
VII	37.498	PMZ_0018461	scaffold_5191	8969	13919	+		chr1	116705157	116707533
VII	37.498	PMZ_0018461	scaffold_5191	8969	13919	+		chr3	53990538	53990053
VII	92.455	PMZ_0002388	scaffold_129	33438	43842	-		chr2	142338942	142355868
VII	92.455	PMZ_0002395	scaffold_129	314524	363507	+		chr2	28771606	28771791
VII	92.455	PMZ_0002396	scaffold_129	519968	533235	+		chr3	80389360	80395420
VII	95.904	PMZ_0006916	scaffold_985	218481	255755	+		chr3	53355041	53377176
VII	95.904	PMZ_0006918	scaffold_985	258718	262342	+		chr3	53379877	53380863
VII	117.661	PMZ_0011074	scaffold_892	713	9560	-		chr1	116784473	116784348
VII	117.661	PMZ_0011075	scaffold_892	77988	86148	-		chr25	1784480	1786242
VII	121.146	PMZ_0018246	scaffold_4968	3446	8071	-		chr3	74091643	74094138
VII	126.449	PMZ_0005880	scaffold_4685	25127	27287	-		chr20	455325	455462
VIII	0.553	PMZ_0012357	scaffold_1105	27099	30625	+		chr15	4540770	4541225
VIII	0.553	PMZ_0012357	scaffold_1105	27099	30625	+		chr19	6527142	6527597
VIII	12.255	PMZ_0013872	scaffold_2339	1023	25334	+		chr1	136029078	136049276
VIII	12.255	PMZ_0013875	scaffold_2339	49433	51037	+		chr19	3173885	3173655
VIII	12.255	PMZ_0013873	scaffold_2339	33730	41968	+		chr4	1883664	1887669
VIII	15.894	PMZ_0021548	scaffold_10493	1146	9430	-		chr19	3173384	3170797
VIII	23.509	PMZ_0005352	scaffold_420	40990	65630	+		chr1	190737233	190733283
VIII	23.509	PMZ_0005354	scaffold_420	95187	137837	+		chr1	190707920	190681012
VIII	23.509	PMZ_0005356	scaffold_420	227736	234510	+		chr1	190511155	190510826
VIII	23.509	PMZ_0005358	scaffold_420	355908	356801	-		chr1	126409330	126408839
VIII	23.509	PMZ_0005352	scaffold_420	40990	65630	+		chr4	63553684	63549740
VIII	23.509	PMZ_0005354	scaffold_420	95187	137837	+		chr4	63542234	63530423
VIII	23.509	PMZ_0005355	scaffold_420	210625	210918	+		chr4	17750592	17750302
VIII	23.509	PMZ_0005356	scaffold_420	227736	234510	+		chr4	17750232	17749912
VIII	23.509	PMZ_0005357	scaffold_420	330224	349074	-		chr4	39795224	39787774
VIII	23.509	PMZ_0005360	scaffold_420	369167	382217	-		chr4	39955993	39940483
VIII	30.201	PMZ_0018748	scaffold_5562	5483	5815	-		chr1	187352240	187352527
VIII	30.201	PMZ_0015661	scaffold_6195	24214	35932	+		chr1	128613921	128608007
VIII	30.201	PMZ_0018748	scaffold_5562	5483	5815	-		chr13	15304844	15305512
VIII	30.201	PMZ_0015661	scaffold_6195	24214	35932	+		chr13	4515579	4512628
VIII	30.201	PMZ_0018748	scaffold_5562	5483	5815	-		chr4	55426111	55426398
VIII	31.926	PMZ_0009101	scaffold_266	104067	109088	-		chr1	137299420	137302086
VIII	31.926	PMZ_0013287	scaffold_1480	3064	5618	+		chr4	26489824	26490003
VIII	31.926	PMZ_0009100	scaffold_266	94104	99507	-		chr4	513599	515434
VIII	31.926	PMZ_0012293	scaffold_1257	21995	43931	+		chr8	21623416	21622110
VIII	32.636	PMZ_0006187	scaffold_96	224274	250593	+		chr1	187461081	187461182
VIII	32.636	PMZ_0006188	scaffold_96	291856	303907	+		chr1	187484087	187485717
VIII	32.636	PMZ_0006189	scaffold_96	310593	316908	+		chr1	187488527	187491841
VIII	32.636	PMZ_0006183	scaffold_96	34169	59475	+		chr4	55367836	55355923
VIII	32.636	PMZ_0006184	scaffold_96	72947	162525	+		chr4	55354256	55276555
VIII	32.636	PMZ_0006187	scaffold_96	224274	250593	+		chr4	437424	437525
VIII	32.636	PMZ_0006188	scaffold_96	291856	303907	+		chr4	452496	456550
VIII	32.636	PMZ_0006189	scaffold_96	310593	316908	+		chr4	33265337	33261213
VIII	36.505	PMZ_0011539	scaffold_2473	10624	11584	+		chr1	187494434	187494565
VIII	36.505	PMZ_0011540	scaffold_2473	48139	66344	-		chr1	184887249	184926933
VIII	36.505	PMZ_0011539	scaffold_2473	10624	11584	+		chr4	33251646	33251506
VIII	38.887	PMZ_0010590	scaffold_1002	50421	54778	-		chr1	200632488	200635281
VIII	38.887	PMZ_0010591	scaffold_1002	59567	78791	+		chr1	200611346	200587160
VIII	38.887	PMZ_0010593	scaffold_1002	104150	107848	-		chr3	33130301	33132068
VIII	38.887	PMZ_0010588	scaffold_1002	8642	18826	-		chr4	22386293	22387193
VIII	38.887	PMZ_0010594	scaffold_1002	109236	113904	-		chr5	1005711	1004273
VIII	41.775	PMZ_0011154	scaffold_1531	95276	102065	+		chr8	21466122	21462392
VIII	41.775	PMZ_0011154	scaffold_1531	95276	102065	+		chrZ	18842210	18844801
VIII	47.767	PMZ_0012541	scaffold_1151	2260	7817	+		chr1	180554963	180557772
VIII	47.767	PMZ_0012542	scaffold_1151	8219	9905	-		chr1	180558673	180558452
VIII	47.767	PMZ_0012543	scaffold_1151	10382	15261	-		chr1	180561839	180561057
VIII	47.767	PMZ_0015613	scaffold_2733	22350	32353	+		chr1	175674817	175669568
VIII	47.767	PMZ_0012545	scaffold_1151	64962	70293	-		chr1	180355064	180355492
VIII	47.767	PMZ_0008458	scaffold_2102	145101	148268	-		chr1	180493493	180493699
VIII	47.767	PMZ_0004078	scaffold_396	196774	202542	+		chr1	184955013	184963236
VIII	47.767	PMZ_0004079	scaffold_396	203102	225590	+		chr1	184985021	185012460
VIII	47.767	PMZ_0004081	scaffold_396	302499	325256	+		chr1	185194382	185208937
VIII	47.767	PMZ_0004083	scaffold_396	355955	372884	-		chr1	185433263	185419015
VIII	47.767	PMZ_0004088	scaffold_396	465479	475441	-		chr1	200547065	200544763
VIII	47.767	PMZ_0004089	scaffold_396	498026	511197	-		chr1	200576445	200576245
VIII	47.767	PMZ_0012545	scaffold_1151	64962	70293	-		chr13	13314524	13314193
VIII	47.767	PMZ_0008460	scaffold_2102	191375	192010	+		chr17	7091738	7092289
VIII	47.767	PMZ_0012544	scaffold_1151	36511	44319	-		chr2	32525485	32525306
VIII	47.767	PMZ_0008457	scaffold_2102	35935	41166	-		chr25	1410054	1410684
VIII	47.767	PMZ_0012544	scaffold_1151	36511	44319	-		chr27	3616713	3616898
VIII	47.767	PMZ_0012544	scaffold_1151	36511	44319	-		chr4	67334487	67334317
VIII	47.767	PMZ_0008458	scaffold_2102	145101	148268	-		chr4	67534515	67534691
VIII	47.767	PMZ_0004084	scaffold_396	373611	398658	+		chr4	15819994	15848301
VIII	47.767	PMZ_0004086	scaffold_396	413292	418792	-		chr4	21946691	21941832
VIII	47.767	PMZ_0008460	scaffold_2102	191375	192010	+		chr8	881570	882115
VIII	49.492	PMZ_0008112	scaffold_1171	184523	197886	-		chr1	176586920	176589590
VIII	51.216	PMZ_0008161	scaffold_765	9020	20576	-		chr4	44695923	44712051
VIII	52.941	PMZ_0015461	scaffold_2666	4087	30385	+		chr1	136272464	136279913
VIII	53.808	PMZ_0019783	scaffold_6997	917	5768	+		chr1	176923520	176925328
VIII	58.262	PMZ_0013700	scaffold_1617	7272	37888	-		chr1	199607016	199643693
VIII	58.262	PMZ_0013704	scaffold_1617	53667	55638	-		chr4	72408848	72410526
VIII	61.712	PMZ_0016317	scaffold_3236	17296	20902	+		chr2	51280973	51279837
VIII	61.712	PMZ_0016318	scaffold_3236	25257	33203	+		chr4	1999508	2005917
VIII	65.161	PMZ_0012874	scaffold_3356	54905	66050	-		chr2	24416570	24416010
VIII	66.886	PMZ_0019434	scaffold_6487	3097	17289	+		chr4	14434827	14445539
VIII	68.856	PMZ_0007992	scaffold_461	21075	26937	-		chr1	200259061	200259866
VIII	68.856	PMZ_0007996	scaffold_461	169664	176346	-		chr13	12247588	12245395
VIII	68.856	PMZ_0007997	scaffold_461	222156	222477	-		chr13	12263494	12263333
VIII	68.856	PMZ_0007996	scaffold_461	169664	176346	-		chr4	44542264	44547287
VIII	68.856	PMZ_0007997	scaffold_461	222156	222477	-		chr4	44379061	44379222
VIII	101.431	PMZ_0003147	scaffold_708	272871	296301	+		chr1	166622501	166661566
VIII	101.431	PMZ_0003149	scaffold_708	298300	366148	-		chr1	170036155	170034736
VIII	101.431	PMZ_0003150	scaffold_708	422165	427734	-		chr1	170141424	170137665
VIII	101.431	PMZ_0003152	scaffold_708	542918	545725	+		chr1	159122922	159120677
VIII	101.431	PMZ_0003146	scaffold_708	107139	109185	+		chr19	8033666	8033884
VIII	101.431	PMZ_0003147	scaffold_708	272871	296301	+		chr4	5970901	5950601
VIII	101.431	PMZ_0003149	scaffold_708	298300	366148	-		chr4	30336280	30335549
VIII	101.431	PMZ_0003152	scaffold_708	542918	545725	+		chr4	70552310	70549639
VIII	103.164	PMZ_0005002	scaffold_141	233565	244380	+		chr1	137583529	137592255
VIII	103.164	PMZ_0005001	scaffold_141	161457	184104	-		chr4	30867694	30849766
VIII	103.164	PMZ_0005004	scaffold_141	413687	414172	-		chr4	31024993	31024631
VIII	114.365	PMZ_0010960	scaffold_606	82914	83069	+		chr1	128898379	128898227
VIII	114.365	PMZ_0010960	scaffold_606	82914	83069	+		chr4	51322856	51322701
VIII	124.868	PMZ_0015966	scaffold_3011	707	17834	-		chr1	177445401	177445715
VIII	124.868	PMZ_0007883	scaffold_305	7578	11794	+		chr1	177608978	177606014
VIII	124.868	PMZ_0002129	scaffold_62	10757	11308	-		chr1	128309913	128310341
VIII	124.868	PMZ_0007884	scaffold_305	21154	29211	+		chr1	177574787	177571059
VIII	124.868	PMZ_0007885	scaffold_305	107010	110334	+		chr1	177301195	177298134
VIII	124.868	PMZ_0007886	scaffold_305	117542	125817	-		chr1	128820640	128818277
VIII	124.868	PMZ_0007887	scaffold_305	142423	159643	-		chr1	128857238	128856525
VIII	124.868	PMZ_0002148	scaffold_62	487392	489950	+		chr11	10760149	10760448
VIII	124.868	PMZ_0002153	scaffold_62	541522	593562	-		chr13	7461425	7507052
VIII	124.868	PMZ_0002140	scaffold_62	422579	426138	-		chr3	23191738	23190262
VIII	124.868	PMZ_0002141	scaffold_62	427584	431584	-		chr3	23195410	23193885
VIII	124.868	PMZ_0002142	scaffold_62	431812	438945	+		chr3	23195912	23199980
VIII	124.868	PMZ_0002146	scaffold_62	468260	478138	+		chr3	23203944	23211253
VIII	124.868	PMZ_0002149	scaffold_62	494384	495595	-		chr3	4224040	4223240
VIII	124.868	PMZ_0002155	scaffold_62	664526	686318	+		chr3	4259656	4269880
VIII	124.868	PMZ_0015965	scaffold_3011	700	14604	+		chr4	34153040	34143296
VIII	124.868	PMZ_0007883	scaffold_305	7578	11794	+		chr4	34279440	34277400
VIII	124.868	PMZ_0002129	scaffold_62	10757	11308	-		chr4	1744604	1744170
VIII	124.868	PMZ_0015967	scaffold_3011	17837	18724	-		chr4	34138968	34139543
VIII	124.868	PMZ_0015968	scaffold_3011	25495	33456	+		chr4	34099366	34077494
VIII	124.868	PMZ_0007887	scaffold_305	142423	159643	-		chr4	51245142	51244648
VIII	124.868	PMZ_0002150	scaffold_62	504917	506478	+		chr4	68614285	68614509
VIII	124.868	PMZ_0002152	scaffold_62	524367	536504	+		chr4	68639517	68644944
VIII	124.868	PMZ_0002148	scaffold_62	487392	489950	+		chr7	20268949	20269179
VIII	124.868	PMZ_0002148	scaffold_62	487392	489950	+		chr8	25434043	25433711
VIII	124.868	PMZ_0002149	scaffold_62	494384	495595	-		chr8	3907532	3906735
VIII	124.868	PMZ_0002156	scaffold_62	687761	705336	+		chr8	4129071	4104895
VIII	124.868	PMZ_0002148	scaffold_62	487392	489950	+		chrZ	27360715	27361053
VIII	136.199	PMZ_0021347	scaffold_10019	374	8911	+		chr1	134659712	134661402
VIII	136.199	PMZ_0006416	scaffold_2047	120255	121321	+		chr1	134671520	134672335
VIII	136.199	PMZ_0006417	scaffold_2047	122251	159316	+		chr1	134674282	134683164
VIII	136.199	PMZ_0006419	scaffold_2047	283880	284490	-		chr4	50647860	50647967
VIII	136.199	PMZ_0006413	scaffold_2047	56234	65205	-		chr8	2308973	2307513
IX	0	PMZ_0016143	scaffold_3230	1041	9601	+		chr17	2261691	2266212
IX	0	PMZ_0016143	scaffold_3230	1041	9601	+		chr8	3832994	3831349
IX	15.508	PMZ_0008891	scaffold_1670	167734	172417	-		chr17	7496966	7496508
IX	15.508	PMZ_0001148	scaffold_53	1842	17057	-		chr28	4489609	4491303
IX	15.508	PMZ_0001157	scaffold_53	816520	836767	-		chr3	99662579	99662406
IX	15.508	PMZ_0001158	scaffold_53	847221	849689	-		chr3	99665990	99665549
IX	15.508	PMZ_0001149	scaffold_53	21342	67167	-		chr8	12021347	12029021
IX	21.265	PMZ_0000296	scaffold_357	843	9412	-		chr11	628072	629805
IX	21.265	PMZ_0000346	scaffold_357	1861269	1870074	+		chr12	650094	644104
IX	21.265	PMZ_0000350	scaffold_357	2030677	2036008	+		chr2	117964532	117961463
IX	21.265	PMZ_0000296	scaffold_357	843	9412	-		chr24	4301205	4298950
IX	21.265	PMZ_0000296	scaffold_357	843	9412	-		chr5	397638	396196
IX	21.265	PMZ_0000348	scaffold_357	1987030	1996236	+		chr5	24453289	24455001
IX	21.265	PMZ_0000303	scaffold_357	138319	151252	-		chr8	4910528	4909249
IX	30.242	PMZ_0004635	scaffold_196	1235	2707	-		chr1	75798999	75800240
IX	30.242	PMZ_0012748	scaffold_2970	6358	12513	-		chr1	51798610	51802639
IX	30.242	PMZ_0012749	scaffold_2970	22396	41412	-		chr1	51680241	51667727
IX	30.242	PMZ_0016831	scaffold_3915	27818	29045	+		chr1	80447772	80448874
IX	30.242	PMZ_0004650	scaffold_196	430178	437865	-		chr1	136647876	136646605
IX	30.242	PMZ_0012747	scaffold_2970	713	4923	+		chr14	13368730	13365859
IX	30.242	PMZ_0012750	scaffold_2970	27294	27542	+		chr14	13199937	13200188
IX	30.242	PMZ_0012751	scaffold_2970	28309	64556	+		chr14	13205920	13208902
IX	30.242	PMZ_0004646	scaffold_196	359672	369192	-		chr17	8900045	8900651
IX	30.242	PMZ_0016830	scaffold_3915	1848	7480	+		chr21	4115363	4113839
IX	30.242	PMZ_0017550	scaffold_4267	1885	11816	+		chr21	6886499	6889937
IX	30.242	PMZ_0017551	scaffold_4267	15505	18651	+		chr21	6892673	6892780
IX	30.242	PMZ_0004635	scaffold_196	1235	2707	-		chr26	1236361	1235021
IX	30.242	PMZ_0004643	scaffold_196	324425	325885	-		chr8	3458324	3459145
IX	30.242	PMZ_0004646	scaffold_196	359672	369192	-		chr8	1378926	1377653
IX	30.242	PMZ_0016610	scaffold_3424	13375	31001	-		chr9	13984782	13988346
IX	31.967	PMZ_0009550	scaffold_510	36693	44764	-		chr17	744517	738860
IX	31.967	PMZ_0010797	scaffold_2368	86020	109039	-		chr21	1987634	1991818
IX	31.967	PMZ_0009550	scaffold_510	36693	44764	-		chr8	3844618	3842573
IX	35.417	PMZ_0011835	scaffold_901	56	1372	+		chr15	3446290	3445859
IX	35.417	PMZ_0011836	scaffold_901	52513	81118	+		chr15	9203839	9206726
IX	35.417	PMZ_0022395	scaffold_13022	697	6454	+		chr17	6067789	6074099
IX	35.417	PMZ_0011835	scaffold_901	56	1372	+		chr19	255378	254821
IX	46.62	PMZ_0002162	scaffold_76	159519	170831	+		chr2	105311357	105304800
IX	46.62	PMZ_0002158	scaffold_76	29766	30128	+		chr3	31474414	31474184
IX	46.62	PMZ_0002171	scaffold_76	463217	468454	-		chr3	20002237	20007362
IX	46.62	PMZ_0002175	scaffold_76	713955	735264	-		chr3	31897568	31897371
IX	46.62	PMZ_0002159	scaffold_76	31706	69796	+		chr5	27032020	27008341
IX	46.62	PMZ_0002164	scaffold_76	254901	257695	+		chr5	47607777	47617583
IX	46.62	PMZ_0002166	scaffold_76	263197	273980	+		chr5	47628359	47635964
IX	46.62	PMZ_0002173	scaffold_76	552310	598657	-		chr5	55567114	55574156
IX	62.336	PMZ_0010415	scaffold_3295	222	1841	-		chr13	8968950	8968372
IX	62.336	PMZ_0016264	scaffold_3181	15963	25478	+		chr19	7108403	7112077
IX	62.336	PMZ_0012328	scaffold_1271	23466	45021	-		chr19	8643511	8630270
IX	62.336	PMZ_0012329	scaffold_1271	48998	62425	+		chr7	16782478	16783503
IX	70.331	PMZ_0014430	scaffold_3855	30644	43630	-		chr19	8608964	8608528
IX	76.433	PMZ_0013878	scaffold_1713	28576	40908	+		chr15	8571663	8573302
IX	76.433	PMZ_0013881	scaffold_1713	49971	54204	-		chr15	8577897	8577143
IX	76.433	PMZ_0013876	scaffold_1713	41	13172	+		chrZ	63704675	63707812
IX	76.433	PMZ_0013880	scaffold_1713	49761	50426	+		chrZ	63710664	63711008
IX	80.138	PMZ_0013524	scaffold_2507	20206	32432	-		chr11	12181244	12171540
IX	80.138	PMZ_0014422	scaffold_1996	33	4302	+		chr15	8527114	8515704
IX	80.138	PMZ_0014724	scaffold_2190	2712	15502	+		chr15	8635809	8630796
IX	80.138	PMZ_0014423	scaffold_1996	14994	30717	-		chr15	8540319	8537368
IX	80.138	PMZ_0014727	scaffold_2190	34493	44616	-		chr15	8636837	8632519
IX	80.138	PMZ_0005628	scaffold_453	355818	362901	-		chr15	8942378	8937056
IX	80.138	PMZ_0014422	scaffold_1996	33	4302	+		chr19	5132460	5144829
IX	80.138	PMZ_0005627	scaffold_453	719	20138	+		chr19	8426320	8406021
IX	83.576	PMZ_0008237	scaffold_652	37812	48581	-		chr1	113743798	113749051
IX	83.576	PMZ_0008243	scaffold_652	180762	202424	-		chr14	6591027	6597002
IX	83.576	PMZ_0008240	scaffold_652	100717	145580	+		chr15	9145519	9105363
IX	83.576	PMZ_0008241	scaffold_652	154365	159884	+		chr15	9080052	9079399
IX	83.576	PMZ_0008241	scaffold_652	154365	159884	+		chr19	4212583	4213227
IX	83.576	PMZ_0008241	scaffold_652	154365	159884	+		chr2	133802426	133781432
IX	83.576	PMZ_0008241	scaffold_652	154365	159884	+		chr20	5213150	5209287
IX	83.576	PMZ_0008241	scaffold_652	154365	159884	+		chr3	99165457	99141637
IX	83.576	PMZ_0008243	scaffold_652	180762	202424	-		chr8	23344074	23352316
IX	88.605	PMZ_0013994	scaffold_1960	45840	53396	+		chr12	738804	739597
IX	88.605	PMZ_0013991	scaffold_1960	18145	38100	-		chr15	5689046	5690940
IX	88.605	PMZ_0013990	scaffold_1960	6403	17662	+		chr19	4283755	4277275
IX	89.746	PMZ_0007427	scaffold_146	6868	26782	+		chr15	9831699	9860534
IX	89.746	PMZ_0007429	scaffold_146	33568	51880	+		chr15	9884916	9898655
IX	89.746	PMZ_0007438	scaffold_146	164154	179597	+		chr15	8949365	8951782
IX	89.746	PMZ_0007432	scaffold_146	90071	111107	+		chr4	1656640	1657896
IX	89.746	PMZ_0007437	scaffold_146	156630	158946	-		chr7	24014540	24012028
IX	93.607	PMZ_0004713	scaffold_197	439603	440643	+		chr15	3836699	3835653
IX	93.607	PMZ_0004712	scaffold_197	406769	419593	+		chr19	4725691	4724276
IX	93.607	PMZ_0004713	scaffold_197	439603	440643	+		chr19	4723594	4722151
IX	95.948	PMZ_0011705	scaffold_1080	8076	23121	+		chr15	11079505	11079305
IX	95.948	PMZ_0011706	scaffold_1080	57145	82665	+		chr15	11041770	11037313
IX	100.982	PMZ_0010321	scaffold_392	345	23666	+		chr14	15178307	15182445
IX	100.982	PMZ_0010322	scaffold_392	28092	44173	+		chr15	5264048	5274767
IX	100.982	PMZ_0010323	scaffold_392	48045	80426	+		chr15	8080992	8075449
IX	111.437	PMZ_0008255	scaffold_2638	13583	20436	-		chr11	6970046	6968579
IX	111.437	PMZ_0013837	scaffold_1694	2601	9263	+		chr15	6015769	6009181
IX	111.437	PMZ_0013839	scaffold_1694	22976	34538	+		chr15	11439863	11441812
IX	111.437	PMZ_0014177	scaffold_1947	36111	45697	+		chr15	8350553	8354796
IX	111.437	PMZ_0010475	scaffold_455	41047	67146	-		chr15	3862152	3835677
IX	111.437	PMZ_0013841	scaffold_1694	42898	54403	-		chr15	12899847	12900891
IX	111.437	PMZ_0008256	scaffold_2638	183731	186212	+		chr15	11132223	11133377
IX	111.437	PMZ_0008258	scaffold_2638	202036	212913	+		chr15	11160150	11166729
IX	111.437	PMZ_0014175	scaffold_1947	498	6646	-		chr19	5160655	5167284
IX	111.437	PMZ_0013838	scaffold_1694	13377	20040	-		chr19	2842953	2838790
IX	111.437	PMZ_0011690	scaffold_1001	20902	26719	+		chr19	4152048	4150700
IX	111.437	PMZ_0013839	scaffold_1694	22976	34538	+		chr19	4821507	4831042
IX	111.437	PMZ_0011691	scaffold_1001	41319	44750	+		chr19	4344694	4344870
IX	111.437	PMZ_0011692	scaffold_1001	55109	60308	+		chr19	4347364	4347453
IX	111.437	PMZ_0010476	scaffold_455	89774	89980	-		chr19	4728825	4728640
IX	111.437	PMZ_0011690	scaffold_1001	20902	26719	+		chr5	18096720	18094981
IX	111.437	PMZ_0014176	scaffold_1947	23899	26488	-		chrZ	63690182	63690952
IX	122.768	PMZ_0006595	scaffold_993	217120	225157	-		chr11	10715921	10718086
IX	122.768	PMZ_0022555	scaffold_13651	72	2237	-		chr15	8338979	8339686
IX	122.768	PMZ_0021017	scaffold_9231	2871	3575	+		chr15	5637322	5637654
IX	122.768	PMZ_0016944	scaffold_3797	12667	19275	-		chr15	2645498	2644830
IX	122.768	PMZ_0006594	scaffold_993	68171	72909	-		chr15	8688982	8691538
IX	122.768	PMZ_0023384	scaffold_17092	17	2909	-		chr19	4859722	4859835
IX	122.768	PMZ_0021017	scaffold_9231	2871	3575	+		chr19	4110542	4110889
IX	122.768	PMZ_0006596	scaffold_993	226651	251160	+		chr22	51224	60869
IX	122.768	PMZ_0006592	scaffold_993	55425	70879	+		chr26	591511	605760
IX	122.768	PMZ_0006593	scaffold_993	65625	67948	-		chr26	608916	607536
IX	122.768	PMZ_0016945	scaffold_3797	20507	22279	-		chr3	47457820	47456480
IX	122.768	PMZ_0006596	scaffold_993	226651	251160	+		chr4	46335809	46345395
IX	122.768	PMZ_0006597	scaffold_993	256030	271330	-		chr4	39307846	39293764
IX	122.961	PMZ_0023648	scaffold_18434	1143	3777	+		chr5	93369	94349
IX	123.155	PMZ_0019725	scaffold_6911	6054	15916	+		chr15	86422	86285
IX	123.155	PMZ_0019722	scaffold_6911	37	3009	+		chr19	5410887	5411057
IX	123.437	PMZ_0009567	scaffold_5752	170153	174706	-		chr13	7955316	7956782
IX	123.437	PMZ_0009563	scaffold_5752	4539	7110	+		chr15	5866657	5866472
IX	123.437	PMZ_0008770	scaffold_1780	144366	186690	+		chr15	4929323	4902508
IX	123.437	PMZ_0009565	scaffold_5752	144745	147960	-		chr15	5314582	5314063
IX	123.437	PMZ_0008771	scaffold_1780	192383	194503	-		chr15	4892123	4892236
IX	123.437	PMZ_0008769	scaffold_1780	251	4545	+		chr19	3471714	3470533
IX	123.437	PMZ_0014090	scaffold_24807	279	5879	+		chr19	6800454	6799507
IX	123.437	PMZ_0014091	scaffold_24807	15310	40064	+		chr19	5332606	5324906
IX	125.191	PMZ_0015264	scaffold_3143	26324	40126	-		chr15	5238877	5243469
IX	125.191	PMZ_0015264	scaffold_3143	26324	40126	-		chr19	9847745	9856840
IX	125.191	PMZ_0015261	scaffold_3143	12595	20079	-		chr6	15931958	15929951
IX	127.169	PMZ_0015361	scaffold_2736	2	15530	-		chr19	5878139	5879507
X	0	PMZ_0005666	scaffold_1278	162203	168072	+		chr3	37384247	37396580
X	0	PMZ_0005666	scaffold_1278	162203	168072	+		chr5	28902426	28880192
X	0	PMZ_0005667	scaffold_1278	194172	211807	+		chr5	28636698	28634364
X	0	PMZ_0005668	scaffold_1278	212095	222616	-		chr5	28622032	28623842
X	8.302	PMZ_0012552	scaffold_1168	8363	20324	-		chr5	29144026	29139952
X	11.019	PMZ_0003840	scaffold_9804	129845	134617	-		chr11	3636989	3636636
X	11.019	PMZ_0003838	scaffold_9804	111336	119309	-		chr3	42377942	42379842
X	11.019	PMZ_0003845	scaffold_9804	352800	357827	-		chr3	31611576	31611938
X	11.019	PMZ_0003847	scaffold_9804	402694	408241	+		chr3	18325678	18326374
X	11.019	PMZ_0003847	scaffold_9804	402694	408241	+		chr5	41551052	41551426
X	27.055	PMZ_0013124	scaffold_1842	20559	25662	+		chr22	2272375	2269699
X	27.055	PMZ_0013124	scaffold_1842	20559	25662	+		chr5	910029	909286
X	27.055	PMZ_0013124	scaffold_1842	20559	25662	+		chr6	31243683	31242943
X	31.973	PMZ_0004465	scaffold_123	267399	293013	+		chr5	53309212	53321842
X	54.492	PMZ_0012022	scaffold_1147	42211	58827	+		chr14	5921154	5943616
X	54.492	PMZ_0012026	scaffold_1147	76524	82437	-		chr3	40164252	40162218
X	54.492	PMZ_0012021	scaffold_1147	29886	36104	+		chr5	58146893	58143694
X	54.492	PMZ_0012026	scaffold_1147	76524	82437	-		chr5	58059054	58066722
X	59.693	PMZ_0006999	scaffold_385	141710	146550	-		chr1	1007516	1007112
X	59.693	PMZ_0006997	scaffold_385	112499	118958	-		chr3	27618	28046
X	59.693	PMZ_0006998	scaffold_385	119201	138623	+		chr3	23224	16163
X	59.693	PMZ_0006999	scaffold_385	141710	146550	-		chr3	28340225	28338893
X	59.693	PMZ_0007001	scaffold_385	235703	266613	-		chr3	32121832	32148284
X	59.693	PMZ_0006999	scaffold_385	141710	146550	-		chr5	46322044	46325753
X	61.554	PMZ_0013738	scaffold_2130	18666	22240	+		chr3	37733361	37731778
X	66.152	PMZ_0007095	scaffold_12985	148942	161978	+		chr3	18788867	18793863
X	66.152	PMZ_0007092	scaffold_12985	111291	119985	+		chr5	53051978	53051832
X	66.152	PMZ_0007093	scaffold_12985	133135	140545	+		chr5	53025644	53025012
X	66.152	PMZ_0007095	scaffold_12985	148942	161978	+		chr5	53014865	53010474
X	68.03	PMZ_0016592	scaffold_3581	5769	9822	+		chr4	3001993	3002928
X	68.03	PMZ_0016592	scaffold_3581	5769	9822	+		chr5	48849066	48849977
X	68.03	PMZ_0016593	scaffold_3581	20610	30052	+		chr5	45352940	45353782
X	71.679	PMZ_0010360	scaffold_661	8645	14144	-		chr2	2263237	2261069
X	71.679	PMZ_0011921	scaffold_2592	16904	22782	+		chr3	39246215	39245991
X	71.679	PMZ_0017207	scaffold_6159	21955	26613	-		chr3	4132086	4133260
X	71.679	PMZ_0011922	scaffold_2592	38097	63405	+		chr3	9522015	9490097
X	71.679	PMZ_0010364	scaffold_661	42071	43228	+		chr3	3270988	3270149
X	71.679	PMZ_0010356	scaffold_661	1355	3093	+		chr5	41323458	41324085
X	71.679	PMZ_0017205	scaffold_6159	16280	19276	+		chr5	60358678	60359804
X	71.679	PMZ_0017207	scaffold_6159	21955	26613	-		chr5	60546448	60544993
X	71.679	PMZ_0012895	scaffold_1272	34949	66463	+		chr5	60554663	60550171
X	71.679	PMZ_0010364	scaffold_661	42071	43228	+		chr5	39747891	39748958
X	71.679	PMZ_0010370	scaffold_661	86363	89776	+		chr5	60158393	60164083
X	71.679	PMZ_0010371	scaffold_661	89621	97264	-		chr5	61327355	61326972
X	71.679	PMZ_0010373	scaffold_661	131715	139959	+		chr5	61375690	61378867
X	71.679	PMZ_0010360	scaffold_661	8645	14144	-		chr6	24749706	24742006
X	71.679	PMZ_0010360	scaffold_661	8645	14144	-		chrZ	20003104	20000777
X	74.146	PMZ_0004010	scaffold_95	21440	29966	-		chr17	6278785	6279247
X	74.146	PMZ_0004019	scaffold_95	313892	322044	+		chr3	18453812	18455236
X	74.146	PMZ_0004022	scaffold_95	347737	353304	+		chr3	16953235	16953330
X	74.146	PMZ_0004026	scaffold_95	461964	465351	-		chr3	32443863	32441992
X	74.146	PMZ_0004011	scaffold_95	42784	58377	-		chr5	51896679	51914257
X	74.146	PMZ_0004013	scaffold_95	111880	112284	-		chr5	51793195	51793566
X	74.146	PMZ_0004014	scaffold_95	112294	112722	-		chr5	51792979	51793176
X	74.146	PMZ_0004015	scaffold_95	205757	224185	-		chr5	51134756	51137163
X	74.146	PMZ_0004017	scaffold_95	247033	249134	+		chr5	50979425	50973259
X	74.146	PMZ_0004019	scaffold_95	313892	322044	+		chr5	50910446	50915558
X	74.146	PMZ_0004020	scaffold_95	337215	341433	+		chr5	61386079	61388447
X	74.146	PMZ_0004027	scaffold_95	470346	487162	-		chr5	40372861	40367914
X	77.411	PMZ_0014920	scaffold_3660	24076	30895	+		chr3	11193308	11190846
X	77.411	PMZ_0014919	scaffold_3660	2885	21302	+		chr5	30548747	30589935
X	88.647	PMZ_0005303	scaffold_10679	175699	178022	-		chr3	29555200	29556477
X	88.647	PMZ_0005303	scaffold_10679	175699	178022	-		chr5	62086942	62085599
X	95.324	PMZ_0014349	scaffold_1948	28	44478	-		chr5	40594823	40576631
X	101.802	PMZ_0018121	scaffold_8150	753	8849	-		chr15	4512643	4505065
X	106.919	PMZ_0002515	scaffold_348	396457	409796	+		chr1	78366591	78366767
X	106.919	PMZ_0002520	scaffold_348	488737	503888	-		chr28	4397971	4388969
X	106.919	PMZ_0008954	scaffold_2378	39	8549	-		chr3	24033176	24029809
X	106.919	PMZ_0014582	scaffold_2093	20079	40170	+		chr3	41953621	41953091
X	106.919	PMZ_0002508	scaffold_348	175107	206050	-		chr3	24139736	24160279
X	106.919	PMZ_0002511	scaffold_348	267233	324441	-		chr3	35938047	35943599
X	106.919	PMZ_0002513	scaffold_348	348928	368315	-		chr3	42151114	42172771
X	106.919	PMZ_0014581	scaffold_2093	47	14066	+		chr5	34571837	34587527
X	106.919	PMZ_0009634	scaffold_497	10484	20548	-		chr5	40928154	40928663
X	106.919	PMZ_0009637	scaffold_497	59383	79785	+		chr5	40743504	40761374
X	106.919	PMZ_0002508	scaffold_348	175107	206050	-		chr5	28207544	28192740
X	106.919	PMZ_0002516	scaffold_348	413978	418385	-		chr8	25855283	25853675
X	106.919	PMZ_0002518	scaffold_348	420252	435985	+		chr8	29418397	29413048
X	106.919	PMZ_0002519	scaffold_348	475381	485792	+		chr8	26019348	26013450
X	106.919	PMZ_0002521	scaffold_348	510285	538816	-		chr8	29833673	29828843
X	115.503	PMZ_0008077	scaffold_1146	189363	195479	+		chr1	178731015	178714331
X	115.503	PMZ_0008080	scaffold_1146	203491	203978	+		chr1	178686990	178684036
X	115.503	PMZ_0008080	scaffold_1146	203491	203978	+		chr4	71050406	71051331
X	115.503	PMZ_0008068	scaffold_1146	23816	36998	+		chr8	22606394	22606773
X	115.503	PMZ_0008072	scaffold_1146	41095	51990	+		chr8	22608827	22612756
X	126.388	PMZ_0004075	scaffold_4455	338873	339928	-		chr28	4428454	4427423
X	126.388	PMZ_0004072	scaffold_4455	10629	22413	+		chr5	26644528	26637076
X	126.388	PMZ_0004073	scaffold_4455	52135	70415	+		chr5	26623715	26611149
X	126.388	PMZ_0004075	scaffold_4455	338873	339928	-		chrZ	72271569	72270538
XI	0	PMZ_0006974	scaffold_826	62507	71813	-		chr1	141809840	141809559
XI	0	PMZ_0006975	scaffold_826	74436	89374	-		chr1	141820955	141820749
XI	0	PMZ_0006976	scaffold_826	122804	138835	-		chr1	141841420	141841280
XI	0	PMZ_0014761	scaffold_3132	500	7228	+		chr18	1148190	1186392
XI	0	PMZ_0019128	scaffold_6042	1307	15337	+		chr18	1070635	1091489
XI	0	PMZ_0017006	scaffold_3779	3997	4254	+		chr2	7660649	7660828
XI	0	PMZ_0006972	scaffold_826	30247	41448	-		chr2	3134318	3137825
XI	0	PMZ_0006973	scaffold_826	59201	60942	-		chr2	3132103	3133307
XI	0	PMZ_0006974	scaffold_826	62507	71813	-		chr4	5038237	5038518
XI	0	PMZ_0014762	scaffold_3132	17840	44723	-		chr7	18703164	18676327
XI	0	PMZ_0006974	scaffold_826	62507	71813	-		chr9	2238824	2239105
XI	0	PMZ_0006975	scaffold_826	74436	89374	-		chr9	2230463	2230690
XI	3.45	PMZ_0007382	scaffold_416	219850	223341	-		chr2	43777279	43777476
XI	3.45	PMZ_0007384	scaffold_416	232608	253374	-		chr2	43472329	43479305
XI	3.45	PMZ_0007379	scaffold_416	29783	35565	+		chrE22C19W28_E50C23	634139	636624
XI	6.899	PMZ_0001601	scaffold_1297	719515	726003	+		chr1	76605353	76598875
XI	6.899	PMZ_0001604	scaffold_1297	831737	850672	-		chr19	7807621	7807430
XI	6.899	PMZ_0001606	scaffold_1297	922857	926413	-		chr19	7895784	7893767
XI	6.899	PMZ_0001586	scaffold_1297	129831	136222	+		chr2	82225105	82230180
XI	6.899	PMZ_0001594	scaffold_1297	460890	472054	+		chr2	80247598	80242583
XI	6.899	PMZ_0001581	scaffold_1297	34616	47948	-		chr4	2234157	2233603
XI	6.899	PMZ_0001597	scaffold_1297	584164	585695	+		chr5	15813354	15810108
XI	6.899	PMZ_0001583	scaffold_1297	80401	96100	-		chr7	34312605	34317190
XI	6.899	PMZ_0001590	scaffold_1297	357398	389673	+		chr7	38051758	38058831
XI	6.899	PMZ_0001592	scaffold_1297	398291	423604	-		chr7	38062954	38062799
XI	14.054	PMZ_0001839	scaffold_6	57480	63270	-		chr2	6144605	6147294
XI	14.054	PMZ_0001840	scaffold_6	254498	260033	-		chr2	1891117	1899148
XI	14.054	PMZ_0001842	scaffold_6	277121	295128	-		chr2	80451227	80455002
XI	14.054	PMZ_0001854	scaffold_6	487906	502128	-		chr2	44861817	44890560
XI	14.054	PMZ_0001855	scaffold_6	521518	534853	-		chr2	44672826	44659613
XI	14.054	PMZ_0001856	scaffold_6	541613	543254	+		chr2	45957983	45957603
XI	14.054	PMZ_0001857	scaffold_6	560809	575827	-		chr2	44706427	44705096
XI	14.054	PMZ_0001861	scaffold_6	654208	690435	-		chr2	44633824	44653942
XI	14.054	PMZ_0001841	scaffold_6	262809	265795	-		chr27	3313603	3317073
XI	14.054	PMZ_0001843	scaffold_6	298279	303710	+		chr27	2240395	2251279
XI	14.054	PMZ_0001844	scaffold_6	310973	315509	+		chr27	2285759	2290401
XI	14.054	PMZ_0001845	scaffold_6	316124	328487	+		chr27	2300489	2304845
XI	14.054	PMZ_0001864	scaffold_6	837396	841455	-		chr28	2670297	2670551
XI	14.054	PMZ_0001863	scaffold_6	826081	832565	-		chr6	17680259	17676302
XI	14.054	PMZ_0001836	scaffold_6	6620	18823	+		chr7	31260537	31276295
XI	14.054	PMZ_0001844	scaffold_6	310973	315509	+		chr7	19592598	19594167
XI	14.054	PMZ_0001845	scaffold_6	316124	328487	+		chr7	19607908	19615097
XI	14.054	PMZ_0001855	scaffold_6	521518	534853	-		chr7	27622605	27613752
XI	14.054	PMZ_0001857	scaffold_6	560809	575827	-		chr7	27662351	27659784
XI	14.054	PMZ_0001858	scaffold_6	589330	623182	-		chr7	27698290	27695945
XI	14.054	PMZ_0001860	scaffold_6	643869	653348	-		chr7	27824815	27823262
XI	14.054	PMZ_0001865	scaffold_6	845981	851162	-		chr7	12606807	12606655
XI	14.054	PMZ_0001864	scaffold_6	837396	841455	-		chrZ	61263827	61264081
XI	17.504	PMZ_0002263	scaffold_8	129508	160966	+		chr14	6593050	6596966
XI	17.504	PMZ_0002266	scaffold_8	196064	207618	+		chr2	3561032	3561145
XI	17.504	PMZ_0002267	scaffold_8	211714	219342	+		chr2	3577285	3580395
XI	17.504	PMZ_0002273	scaffold_8	499188	530258	+		chr2	799057	787667
XI	17.504	PMZ_0002274	scaffold_8	534988	578290	-		chr2	9834682	9851136
XI	17.504	PMZ_0002266	scaffold_8	196064	207618	+		chr27	2739948	2739814
XI	17.504	PMZ_0002267	scaffold_8	211714	219342	+		chr27	2739073	2738468
XI	17.504	PMZ_0002272	scaffold_8	316273	347060	+		chr7	37190704	37183008
XI	17.504	PMZ_0002263	scaffold_8	129508	160966	+		chr8	23346649	23352292
XI	20.954	PMZ_0008728	scaffold_522	16836	32656	-		chr2	46229583	46227156
XI	20.954	PMZ_0008726	scaffold_522	6566	16298	+		chr27	1607987	1610598
XI	20.954	PMZ_0008729	scaffold_522	35264	65647	+		chr9	4493958	4536056
XI	20.954	PMZ_0008730	scaffold_522	67200	80417	+		chr9	4674809	4673548
XI	20.954	PMZ_0008731	scaffold_522	83959	110859	-		chr9	4655349	4662018
XI	20.954	PMZ_0008732	scaffold_522	127159	127809	-		chr9	4654646	4654834
XI	28.831	PMZ_0010500	scaffold_464	30001	39873	+		chr2	22624537	22626600
XI	28.831	PMZ_0010501	scaffold_464	34810	54097	-		chr2	19616570	19623089
XI	28.831	PMZ_0010502	scaffold_464	56654	75411	+		chr2	19583190	19576121
XI	28.831	PMZ_0002323	scaffold_439	720898	766516	-		chr2	4174149	4213195
XI	28.831	PMZ_0010499	scaffold_464	21345	27282	-		chr27	1294487	1290813
XI	28.831	PMZ_0002316	scaffold_439	478809	482708	+		chr4	12619696	12618781
XI	28.831	PMZ_0010502	scaffold_464	56654	75411	+		chr7	37042766	37035082
XI	28.831	PMZ_0002320	scaffold_439	515924	522577	+		chr7	23789447	23790462
XI	28.831	PMZ_0002321	scaffold_439	527746	579108	+		chr7	32117870	32133456
XI	33.982	PMZ_0011299	scaffold_24833	19113	42054	+		chr2	46062349	46078395
XI	33.982	PMZ_0011298	scaffold_24833	6196	17004	-		chr6	33883588	33879109
XI	33.982	PMZ_0011301	scaffold_24833	43954	80044	+		chr7	32251551	32259252
XI	42.311	PMZ_0014314	scaffold_1932	170	28396	+		chr1	183146493	183133425
XI	42.311	PMZ_0022130	scaffold_12132	1809	6691	+		chr2	22607789	22606101
XI	42.311	PMZ_0015120	scaffold_2552	10751	22598	-		chr2	16647585	16656036
XI	42.311	PMZ_0013189	scaffold_1926	5861	34253	+		chr7	3947245	3965655
XI	42.311	PMZ_0015228	scaffold_4302	19733	25486	-		chr7	36543176	36544008
XI	42.311	PMZ_0015121	scaffold_2552	26200	32592	+		chr7	16512908	16506758
XI	47.614	PMZ_0006706	scaffold_145	34793	39277	-		chr2	23356629	23355282
XI	47.614	PMZ_0006710	scaffold_145	144329	171970	+		chr2	23566144	23568951
XI	47.614	PMZ_0006711	scaffold_145	179967	188895	-		chr2	20511903	20512313
XI	47.614	PMZ_0005569	scaffold_211	186166	186615	-		chr2	36558043	36557909
XI	47.614	PMZ_0005569	scaffold_211	186166	186615	-		chr27	4446726	4446520
XI	47.614	PMZ_0006709	scaffold_145	95963	136921	+		chr7	601676	601485
XI	47.614	PMZ_0006710	scaffold_145	144329	171970	+		chr7	569610	567184
XI	47.614	PMZ_0005569	scaffold_211	186166	186615	-		chr7	15950998	15951174
XI	47.614	PMZ_0006714	scaffold_145	220264	245160	-		chr7	1331639	1314575
XI	47.614	PMZ_0005570	scaffold_211	231079	319637	-		chr7	15882084	15898510
XI	47.614	PMZ_0005571	scaffold_211	320306	324055	-		chr7	15878162	15880624
XI	48.476	PMZ_0005201	scaffold_72	26534	29306	+		chr7	16464839	16464250
XI	48.476	PMZ_0005206	scaffold_72	330771	360886	-		chr7	16258344	16266275
XI	48.476	PMZ_0005207	scaffold_72	364113	365370	-		chr7	16246272	16247229
XI	48.476	PMZ_0005209	scaffold_72	394700	396410	-		chr7	16217042	16217224
XI	51.063	PMZ_0010046	scaffold_593	139174	143268	-		chr1	55673122	55674096
XI	51.063	PMZ_0010038	scaffold_593	45395	50338	+		chr2	3348863	3346908
XI	51.063	PMZ_0010040	scaffold_593	58528	60318	+		chr2	22082609	22084207
XI	51.063	PMZ_0010038	scaffold_593	45395	50338	+		chr27	2747045	2747732
XI	51.063	PMZ_0010040	scaffold_593	58528	60318	+		chr7	12742409	12744001
XI	51.063	PMZ_0010047	scaffold_593	142666	155407	+		chr7	12844735	12856408
XI	62.029	PMZ_0016618	scaffold_3434	5383	23673	-		chr7	26798676	26812538
XI	84.912	PMZ_0005148	scaffold_323	373341	373559	-		chr11	20805843	20805968
XI	84.912	PMZ_0005148	scaffold_323	373341	373559	-		chr17	2277282	2277157
XI	84.912	PMZ_0005126	scaffold_323	27169	36322	+		chr2	51648091	51663217
XI	84.912	PMZ_0005134	scaffold_323	248221	257090	+		chr2	11378026	11369631
XI	84.912	PMZ_0005136	scaffold_323	260527	261726	+		chr2	31189629	31189456
XI	84.912	PMZ_0005142	scaffold_323	316698	325504	+		chr2	37927662	37909692
XI	84.912	PMZ_0005148	scaffold_323	373341	373559	-		chr2	67486339	67486464
XI	84.912	PMZ_0005149	scaffold_323	376504	400281	+		chr2	38416826	38409013
XI	84.912	PMZ_0005136	scaffold_323	260527	261726	+		chr27	3435075	3434902
XI	84.912	PMZ_0005143	scaffold_323	330969	341171	+		chr7	32269400	32267615
XI	84.912	PMZ_0005138	scaffold_323	269218	287648	+		chr9	5455533	5466055
XI	84.912	PMZ_0005129	scaffold_323	54708	57176	-		chrE22C19W28_E50C23	861812	860740
XI	85.258	PMZ_0001562	scaffold_98	396153	400072	-		chr10	6363369	6363136
XI	85.258	PMZ_0001574	scaffold_98	501912	523336	-		chr10	12483596	12495869
XI	85.258	PMZ_0001578	scaffold_98	641251	642198	+		chr10	19742244	19741750
XI	85.258	PMZ_0001538	scaffold_98	1576	2534	+		chr2	77348457	77349139
XI	85.258	PMZ_0001540	scaffold_98	11581	18298	+		chr2	77432233	77436569
XI	85.258	PMZ_0001546	scaffold_98	44415	56805	-		chr2	4598163	4600395
XI	85.258	PMZ_0001547	scaffold_98	58739	59495	-		chr2	4591913	4592957
XI	85.258	PMZ_0001564	scaffold_98	421543	421773	+		chr2	35790551	35790673
XI	85.258	PMZ_0001568	scaffold_98	449169	468186	+		chr2	35826915	35853834
XI	85.258	PMZ_0001566	scaffold_98	442303	444599	+		chr27	4491575	4490121
XI	85.258	PMZ_0001576	scaffold_98	618678	633908	-		chr28	555519	577202
XI	85.258	PMZ_0001538	scaffold_98	1576	2534	+		chr7	23518138	23517100
XI	85.258	PMZ_0001539	scaffold_98	5996	9197	-		chr7	24875754	24874618
XI	85.258	PMZ_0001541	scaffold_98	16070	25900	-		chr7	24907479	24882928
XI	85.258	PMZ_0001553	scaffold_98	92967	104457	+		chr7	14832173	14825913
XI	85.258	PMZ_0001554	scaffold_98	105566	125238	+		chr7	14821716	14802449
XI	85.258	PMZ_0001556	scaffold_98	129693	131515	+		chr7	14793770	14791583
XI	85.258	PMZ_0001573	scaffold_98	488056	497252	+		chr7	14896911	14887369
XI	85.258	PMZ_0001561	scaffold_98	381255	382574	-		chrZ	36935012	36936151
XI	85.258	PMZ_0001571	scaffold_98	479860	481708	-		chrZ	36295615	36292112
XI	85.258	PMZ_0001572	scaffold_98	483728	487632	-		chrZ	36414632	36415412
XI	85.258	PMZ_0001578	scaffold_98	641251	642198	+		chrZ	44436937	44435079
XI	85.258	PMZ_0001580	scaffold_98	956810	963905	-		chrZ	39217461	39217261
XI	88.696	PMZ_0019000	scaffold_5912	15339	18323	+		chr11	10666114	10667459
XI	88.696	PMZ_0012732	scaffold_1207	45745	54019	+		chr2	13304204	13305014
XI	88.696	PMZ_0023169	scaffold_16132	1561	2988	+		chr7	201757	202134
XI	88.696	PMZ_0012731	scaffold_1207	22690	36150	+		chr7_random	69676	68660
XII	0	PMZ_0016864	scaffold_6676	1546	14222	+		chr23	5817197	5817705
XII	17.398	PMZ_0013718	scaffold_2194	44118	54705	-		chr2	120870392	120867553
XII	28.068	PMZ_0011042	scaffold_642	18844	29705	-		chr2	125609830	125608804
XII	28.068	PMZ_0023458	scaffold_17423	2	4852	+		chr20	7926267	7924217
XII	28.068	PMZ_0011047	scaffold_642	103207	107003	-		chr23	5839224	5839343
XII	28.068	PMZ_0011043	scaffold_642	31334	55888	-		chr3	99099982	99090002
XII	28.068	PMZ_0011045	scaffold_642	70954	101414	-		chr3	107380392	107377484
XII	31.518	PMZ_0019664	scaffold_6824	2574	9986	-		chr2	119069695	119066313
XII	31.518	PMZ_0019869	scaffold_7155	590	2498	-		chr23	1819720	1820349
XII	36.82	PMZ_0003237	scaffold_807	410584	417171	+		chr1	35241087	35241449
XII	36.82	PMZ_0003240	scaffold_807	537228	547979	-		chr1	35464038	35456843
XII	36.82	PMZ_0003232	scaffold_807	196238	202821	-		chr12	19926192	19923378
XII	36.82	PMZ_0003238	scaffold_807	498594	510906	+		chr12	20009103	19997925
XII	36.82	PMZ_0003239	scaffold_807	519695	532862	+		chr12	19985418	19981153
XII	36.82	PMZ_0003241	scaffold_807	549833	558983	+		chr12	20066991	20071648
XII	36.82	PMZ_0019656	scaffold_7444	12557	13408	+		chr2	120946424	120945891
XII	36.82	PMZ_0003235	scaffold_807	342552	346641	+		chr2	143702785	143700556
XII	36.82	PMZ_0019655	scaffold_7444	372	566	+		chr20	10068944	10069087
XII	36.82	PMZ_0008060	scaffold_486	194605	211483	+		chr20	181625	184717
XII	36.82	PMZ_0021377	scaffold_10090	5357	8468	-		chr3	90959509	90963159
XII	40.398	PMZ_0007864	scaffold_242	97708	122737	-		chr2	141359566	141332445
XII	43.847	PMZ_0011386	scaffold_1123	32182	43033	-		chr2	115008661	114999653
XII	43.847	PMZ_0011388	scaffold_1123	68211	84537	-		chr2	119511887	119505864
XII	43.847	PMZ_0011387	scaffold_1123	53769	63868	-		chr20	3605862	3602681
XII	47.425	PMZ_0022599	scaffold_13782	239	3298	-		chr2	146593811	146593650
XII	49.728	PMZ_0011328	scaffold_769	2405	63691	-		chr2	119796110	119757469
XII	64.468	PMZ_0006613	scaffold_1541	268214	270600	+		chr2	103978718	103978236
XII	64.468	PMZ_0006614	scaffold_1541	281850	282070	+		chr2	103992562	103992392
XII	64.468	PMZ_0006613	scaffold_1541	268214	270600	+		chr20	445654	443880
XII	64.468	PMZ_0006614	scaffold_1541	281850	282070	+		chr20	443761	443591
XII	65.082	PMZ_0014915	scaffold_3671	9676	11980	+		chr2	143897142	143898753
XII	65.082	PMZ_0014913	scaffold_3671	3284	4188	+		chr3	108102245	108102933
XII	65.082	PMZ_0014914	scaffold_3671	4567	8276	+		chr3	108103386	108104219
XII	72.514	PMZ_0013386	scaffold_2211	34737	40094	-		chr2	132433248	132438394
XII	72.514	PMZ_0013384	scaffold_2211	4849	16745	+		chr3	103116005	103115321
XII	74.239	PMZ_0009409	scaffold_362	5698	17640	-		chr2	132331994	132346142
XII	74.239	PMZ_0006091	scaffold_470	224695	231456	-		chr2	132808941	132810709
XII	74.239	PMZ_0009409	scaffold_362	5698	17640	-		chr20	5126590	5128069
XII	74.239	PMZ_0011947	scaffold_1209	60838	82638	+		chr25	113146	98488
XII	74.239	PMZ_0009409	scaffold_362	5698	17640	-		chr3	83562819	83565822
XII	74.239	PMZ_0009411	scaffold_362	51648	69805	-		chr3	104333995	104331208
XII	98.336	PMZ_0009134	scaffold_813	41538	59254	+		chr2	60716683	60727155
XII	98.336	PMZ_0009136	scaffold_813	140323	153007	-		chr2	63183499	63181600
XII	98.336	PMZ_0008697	scaffold_2681	167359	195120	-		chr2	146142834	146129580
XII	98.336	PMZ_0003995	scaffold_61	454731	467739	+		chr2	149898934	149893942
XII	98.336	PMZ_0010444	scaffold_444	99275	132097	-		chr23	5207949	5208733
XII	98.336	PMZ_0010441	scaffold_444	3	16879	+		chr3	85293663	85314395
XII	98.336	PMZ_0003995	scaffold_61	454731	467739	+		chr3	85450779	85442339
XII	98.336	PMZ_0008695	scaffold_2681	38613	41188	+		chr5	61384387	61384241
XII	101.913	PMZ_0004718	scaffold_552	155185	164741	-		chr2	119663337	119660474
XII	101.913	PMZ_0004721	scaffold_552	298038	309191	-		chr2	146277294	146268798
XII	101.913	PMZ_0004722	scaffold_552	334378	340537	-		chr2	146288517	146283406
XII	101.913	PMZ_0004717	scaffold_552	115300	131644	-		chr20	6408311	6420322
XII	101.913	PMZ_0004720	scaffold_552	284199	292860	-		chr20	1140180	1144754
XII	101.913	PMZ_0004721	scaffold_552	298038	309191	-		chr20	1136317	1139321
XII	102.776	PMZ_0016546	scaffold_3519	30	7199	+		chr20	9956202	9956330
XII	102.776	PMZ_0016546	scaffold_3519	30	7199	+		chr3	98724872	98724997
XII	103.638	PMZ_0017169	scaffold_3932	66	21431	-		chr1	169845641	169845342
XII	107.178	PMZ_0003746	scaffold_31	464826	465560	-		chr1	83980331	83979882
XII	107.178	PMZ_0003746	scaffold_31	464826	465560	-		chr24	2634278	2633907
XII	107.178	PMZ_0003745	scaffold_31	444351	453687	-		chr3	85314081	85314395
XII	114.519	PMZ_0011955	scaffold_1194	9378	22614	+		chr2	104077299	104081944
XII	114.519	PMZ_0003530	scaffold_230	118884	120399	-		chr2	136944647	136944459
XII	114.519	PMZ_0003660	scaffold_103	183856	223711	-		chr2	121608324	121596745
XII	114.519	PMZ_0003532	scaffold_230	196682	197347	+		chr2	136767430	136767005
XII	114.519	PMZ_0003661	scaffold_103	234445	236517	-		chr2	121636658	121636566
XII	114.519	PMZ_0003667	scaffold_103	468517	476551	-		chr2	121961744	121961523
XII	114.519	PMZ_0003661	scaffold_103	234445	236517	-		chr20	5686513	5686602
XII	114.519	PMZ_0003546	scaffold_230	405090	416795	-		chr20	424706	430160
XII	114.519	PMZ_0003528	scaffold_230	11737	22948	-		chr23	4054188	4052556
XII	114.519	PMZ_0011957	scaffold_1194	36170	40102	-		chr23	5903643	5903063
XII	114.519	PMZ_0003660	scaffold_103	183856	223711	-		chr23	1441054	1435866
XII	114.519	PMZ_0003533	scaffold_230	205340	213416	+		chr23	2574884	2567308
XII	114.519	PMZ_0003534	scaffold_230	214039	215956	+		chr23	2564453	2564289
XII	114.519	PMZ_0003537	scaffold_230	231893	243793	-		chr23	5708754	5709074
XII	114.519	PMZ_0003661	scaffold_103	234445	236517	-		chr23	1441342	1441253
XII	114.519	PMZ_0003539	scaffold_230	253850	262303	-		chr23	5651401	5652871
XII	114.519	PMZ_0003546	scaffold_230	405090	416795	-		chr23	4758066	4759365
XII	114.519	PMZ_0011954	scaffold_1194	2896	8296	+		chr3	93596399	93596268
XII	114.519	PMZ_0011956	scaffold_1194	23666	25890	+		chr3	93569748	93566222
XII	114.519	PMZ_0003660	scaffold_103	183856	223711	-		chr3	58326507	58318374
XII	114.519	PMZ_0003532	scaffold_230	196682	197347	+		chr3	62168189	62168641
XII	114.519	PMZ_0003661	scaffold_103	234445	236517	-		chr3	58342950	58342858
XII	114.519	PMZ_0003539	scaffold_230	253850	262303	-		chr3	89807723	89811076
XII	114.519	PMZ_0003662	scaffold_103	255684	257272	-		chr3	58355083	58354934
XII	114.519	PMZ_0003540	scaffold_230	286717	291636	-		chr3	89800048	89800419
XII	114.519	PMZ_0003545	scaffold_230	374450	377554	-		chr3	93826456	93825213
XII	114.519	PMZ_0003667	scaffold_103	468517	476551	-		chr3	58220892	58220671
XII	114.519	PMZ_0003548	scaffold_230	488850	514708	-		chr3	93953885	93917077
XII	114.519	PMZ_0003669	scaffold_103	533564	545426	+		chr3	57766125	57776034
XII	117.969	PMZ_0004631	scaffold_154	22181	24428	+		chr1	81214771	81213490
XII	117.969	PMZ_0004632	scaffold_154	35709	62681	+		chr3	90027664	90033588
XIII	0	PMZ_0023207	scaffold_16280	24	4799	-		chr6	23676395	23677012
XIII	7.066	PMZ_0003523	scaffold_253	539099	546513	+		chr13	8421793	8398000
XIII	7.066	PMZ_0003508	scaffold_253	113649	133441	-		chr18	10084142	10082450
XIII	7.066	PMZ_0003514	scaffold_253	341015	350083	+		chr18	10482167	10478537
XIII	7.066	PMZ_0003521	scaffold_253	493588	517436	+		chr5	45343830	45310852
XIII	7.066	PMZ_0003522	scaffold_253	521147	533487	+		chrZ	51619139	51624912
XIII	7.066	PMZ_0003524	scaffold_253	553786	562923	+		chrZ	51530311	51523863
XIII	12.305	PMZ_0008226	scaffold_2044	249	4290	+		chr13	18603599	18593644
XIII	12.305	PMZ_0008226	scaffold_2044	249	4290	+		chr22	479265	465514
XIII	12.305	PMZ_0008226	scaffold_2044	249	4290	+		chr4	82200388	82178508
XIII	12.305	PMZ_0008228	scaffold_2044	10403	28740	-		chr4	85336285	85325408
XIII	12.305	PMZ_0008226	scaffold_2044	249	4290	+		chr6	36880945	36888740
XIII	12.305	PMZ_0008229	scaffold_2044	35302	41469	-		chr6	11952399	11959987
XIII	12.305	PMZ_0008230	scaffold_2044	170272	176445	-		chr6	32057263	32058948
XIII	12.305	PMZ_0008231	scaffold_2044	180113	191840	-		chr6	24928513	24930646
XIII	12.305	PMZ_0008232	scaffold_2044	193293	199521	-		chr6	23571979	23571292
XIII	12.305	PMZ_0008233	scaffold_2044	204935	208323	-		chr6	24832643	24833431
XIII	14.094	PMZ_0006423	scaffold_658	113770	125221	-		chr10	1893029	1892134
XIII	14.094	PMZ_0011873	scaffold_914	3723	8721	+		chr13	8640835	8661257
XIII	14.094	PMZ_0011874	scaffold_914	21742	60750	-		chr4	50865469	50855026
XIII	14.094	PMZ_0006421	scaffold_658	58845	70720	-		chr4	50993014	50998799
XIII	14.094	PMZ_0006424	scaffold_658	121024	122166	+		chr5	34611979	34616031
XIII	14.094	PMZ_0006420	scaffold_658	16050	22620	-		chr6	23362545	23345737
XIII	14.094	PMZ_0011874	scaffold_914	21742	60750	-		chr6	20981476	20973940
XIII	14.094	PMZ_0006422	scaffold_658	76690	77742	-		chr6	21032736	21033521
XIII	16.351	PMZ_0009204	scaffold_2143	309	11094	-		chr13	18667922	18657259
XIII	16.351	PMZ_0009204	scaffold_2143	309	11094	-		chr4	82365663	82338327
XIII	16.351	PMZ_0009204	scaffold_2143	309	11094	-		chr6	36849662	36864044
XIII	21.401	PMZ_0003782	scaffold_65	469926	477732	+		chr13	18814512	18815267
XIII	21.401	PMZ_0003782	scaffold_65	469926	477732	+		chr4	88763126	88761357
XIII	21.401	PMZ_0003781	scaffold_65	285605	304719	-		chr6	9038732	9063688
XIII	21.401	PMZ_0003782	scaffold_65	469926	477732	+		chr6	8883349	8881025
XIII	21.401	PMZ_0003784	scaffold_65	501466	525022	+		chr6	25523671	25566424
XIII	23.292	PMZ_0014100	scaffold_1827	2090	6668	+		chr22	2227178	2229738
XIII	23.292	PMZ_0014101	scaffold_1827	18169	48902	-		chr6	22848718	22848103
XIII	36.556	PMZ_0001952	scaffold_198	123344	136753	-		chr13	8085932	8068235
XIII	36.556	PMZ_0001956	scaffold_198	254096	279495	-		chr13	8532408	8536339
XIII	36.556	PMZ_0001964	scaffold_198	351786	354564	+		chr13	11368780	11367608
XIII	36.556	PMZ_0001965	scaffold_198	516294	538518	+		chr13	10746339	10764504
XIII	36.556	PMZ_0001966	scaffold_198	615260	629802	+		chr13	10978224	11002380
XIII	36.556	PMZ_0001951	scaffold_198	90726	99110	+		chr25	1872119	1875108
XIII	36.556	PMZ_0001949	scaffold_198	16651	18317	-		chr6	36976564	36977946
XIII	36.556	PMZ_0001960	scaffold_198	302964	324538	-		chr6	11959826	11964153
XIII	36.556	PMZ_0001961	scaffold_198	325651	329810	+		chr6	33894231	33894425
XIII	36.556	PMZ_0001962	scaffold_198	334036	340667	+		chr6	24589135	24594874
XIII	36.556	PMZ_0001966	scaffold_198	615260	629802	+		chr6	36175366	36166803
XIII	36.556	PMZ_0001958	scaffold_198	282449	293113	+		chrZ	52428685	52424883
XIII	36.556	PMZ_0001959	scaffold_198	294529	296668	+		chrZ	52424308	52421946
XIII	55.142	PMZ_0001889	scaffold_851	165099	166496	+		chr4	84591935	84590796
XIII	55.142	PMZ_0001889	scaffold_851	165099	166496	+		chr6	27693860	27694918
XIII	55.142	PMZ_0001895	scaffold_851	794304	794699	-		chr6	30560071	30559943
XIII	57.608	PMZ_0005434	scaffold_162	248249	267713	+		chr28	2781802	2787255
XIII	57.608	PMZ_0008012	scaffold_1594	190765	195450	+		chr3	23649360	23650196
XIII	57.608	PMZ_0005436	scaffold_162	347624	364061	-		chr4	82873408	82894875
XIII	57.608	PMZ_0008011	scaffold_1594	141989	175711	+		chr5	56053412	56098851
XIII	57.608	PMZ_0005433	scaffold_162	205363	206445	-		chr6	31243683	31242721
XIII	57.608	PMZ_0005434	scaffold_162	248249	267713	+		chrZ	42894965	42879583
XIII	61.912	PMZ_0017109	scaffold_3870	5549	21130	-		chr13	8263955	8257872
XIII	61.912	PMZ_0003818	scaffold_28	394591	395907	-		chr13	8209837	8210886
XIII	61.912	PMZ_0017109	scaffold_3870	5549	21130	-		chr4	83805751	83813532
XIII	61.912	PMZ_0003814	scaffold_28	294386	317332	+		chr4_random	176551	174270
XIII	61.912	PMZ_0003815	scaffold_28	322527	337917	+		chr4	47924165	47909244
XIII	61.912	PMZ_0017108	scaffold_3870	697	3819	+		chr6	29206549	29207918
XIII	61.912	PMZ_0003808	scaffold_28	178601	192576	+		chr6	33386712	33379398
XIII	61.912	PMZ_0003809	scaffold_28	195319	212746	-		chr6	33523208	33506796
XIII	61.912	PMZ_0003816	scaffold_28	339323	353990	-		chr6	27661974	27679555
XIII	61.912	PMZ_0003817	scaffold_28	353931	381446	+		chr6	29155391	29144778
XIII	61.912	PMZ_0003818	scaffold_28	394591	395907	-		chr6	29115167	29116183
XIII	61.912	PMZ_0003820	scaffold_28	523664	531919	+		chr6	29198296	29204792
XIII	68.051	PMZ_0021098	scaffold_9419	611	10812	+		chr6	30386570	30380807
XIII	75.078	PMZ_0007412	scaffold_380	658	13540	+		chr4	75895602	75884967
XIII	75.078	PMZ_0007414	scaffold_380	173014	181574	-		chr4	81505179	81517293
XIII	75.078	PMZ_0007415	scaffold_380	184472	195580	-		chr6	10477112	10471470
XIII	75.078	PMZ_0007416	scaffold_380	197923	203817	+		chr6	10487781	10488560
XIII	75.945	PMZ_0005085	scaffold_88	25340	28314	+		chr11	11859962	11859834
XIII	75.945	PMZ_0005088	scaffold_88	125103	125657	+		chr13	3233324	3232941
XIII	75.945	PMZ_0005085	scaffold_88	25340	28314	+		chr2	42872273	42872142
XIII	75.945	PMZ_0005090	scaffold_88	213429	257586	+		chr22	1342937	1337511
XIII	75.945	PMZ_0005095	scaffold_88	390994	401150	-		chr4	75996397	75988755
XIII	75.945	PMZ_0005088	scaffold_88	125103	125657	+		chr6	24487968	24487576
XIII	75.945	PMZ_0005092	scaffold_88	292489	298035	+		chr6	24465834	24465598
XIII	75.945	PMZ_0005083	scaffold_88	2020	10211	-		chr8	20373075	20373926
XIII	75.945	PMZ_0005083	scaffold_88	2020	10211	-		chrZ	66883742	66885637
XIII	76.811	PMZ_0005219	scaffold_209	381490	396371	-		chr13	2554163	2564277
XIII	76.811	PMZ_0005214	scaffold_209	13294	23534	-		chr4	92094928	92094683
XIII	76.811	PMZ_0012221	scaffold_1020	37262	75576	-		chr4	35333805	35363317
XIII	76.811	PMZ_0005215	scaffold_209	253216	263964	+		chr4	89298721	89302482
XIII	76.811	PMZ_0005217	scaffold_209	327841	359755	-		chr4	89323429	89308386
XIII	76.811	PMZ_0005218	scaffold_209	367406	375988	-		chr4	78879612	78868959
XIII	76.811	PMZ_0012220	scaffold_1020	12152	29149	+		chrZ	52685684	52664693
XIII	81.712	PMZ_0012424	scaffold_1098	1885	19723	+		chr4	88345021	88344776
XIII	81.712	PMZ_0012425	scaffold_1098	30418	34193	+		chr4	88248789	88244829
XIII	81.712	PMZ_0012426	scaffold_1098	56581	63334	-		chr4	88612342	88608500
XIII	82.221	PMZ_0009568	scaffold_302	22906	57829	+		chr13	2629791	2634716
XIII	82.221	PMZ_0009568	scaffold_302	22906	57829	+		chr6	24289884	24279764
XIII	82.221	PMZ_0009572	scaffold_302	85009	87870	-		chr6	25028220	25027421
XIII	82.221	PMZ_0009571	scaffold_302	77003	82151	+		chrZ	7148458	7146797
XIII	84.033	PMZ_0005690	scaffold_227	186794	193304	-		chr13	18694849	18687127
XIII	84.033	PMZ_0006101	scaffold_379	147356	151639	-		chr17	1325942	1325656
XIII	84.033	PMZ_0006102	scaffold_379	295842	299163	-		chr17	790148	791054
XIII	84.033	PMZ_0006102	scaffold_379	295842	299163	-		chr2	41207102	41206083
XIII	84.033	PMZ_0006094	scaffold_379	661	7176	+		chr22	1221610	1223868
XIII	84.033	PMZ_0006096	scaffold_379	51695	92847	-		chr22	2477538	2480934
XIII	84.033	PMZ_0006097	scaffold_379	95963	102056	-		chr24	4375486	4374687
XIII	84.033	PMZ_0006094	scaffold_379	661	7176	+		chr4_random	108077	108949
XIII	84.033	PMZ_0006099	scaffold_379	119771	128239	-		chr4	83955888	83965994
XIII	84.033	PMZ_0006100	scaffold_379	129522	143896	+		chr4	83945273	83923224
XIII	84.033	PMZ_0005688	scaffold_227	158654	162071	-		chr4	92631382	92625075
XIII	84.033	PMZ_0005684	scaffold_227	102098	105755	+		chr6	20835818	20843667
XIII	84.033	PMZ_0005691	scaffold_227	203352	231064	-		chr6	32412214	32368878
XIII	84.033	PMZ_0006098	scaffold_379	104070	117109	-		chr9	15158069	15156073
XIII	91.226	PMZ_0003397	scaffold_11	485046	500487	-		chr13	3292887	3283399
XIII	91.226	PMZ_0003392	scaffold_11	59725	70693	-		chr22	1395471	1402236
XIII	91.226	PMZ_0003392	scaffold_11	59725	70693	-		chr4	92886206	92879053
XIII	91.226	PMZ_0003396	scaffold_11	449050	456670	-		chr4_random	79814	79605
XIII	92.951	PMZ_0002760	scaffold_68	60529	64426	-		chr11	628354	629571
XIII	92.951	PMZ_0005309	scaffold_810	203014	225214	+		chr13	3863853	3852999
XIII	92.951	PMZ_0002774	scaffold_68	566397	568132	+		chr13	7603560	7604162
XIII	92.951	PMZ_0002764	scaffold_68	174151	178680	-		chr2	148765749	148768100
XIII	92.951	PMZ_0005308	scaffold_810	200496	201449	+		chr22	887787	886940
XIII	92.951	PMZ_0005309	scaffold_810	203014	225214	+		chr22	886644	878790
XIII	92.951	PMZ_0002764	scaffold_68	174151	178680	-		chr23	5343741	5345050
XIII	92.951	PMZ_0005304	scaffold_810	76686	102072	+		chr4	93159592	93156406
XIII	92.951	PMZ_0005305	scaffold_810	106368	109354	-		chr4	89168888	89169975
XIII	92.951	PMZ_0002774	scaffold_68	566397	568132	+		chr4	79689692	79689069
XIII	92.951	PMZ_0002777	scaffold_68	587478	627914	+		chr4	79655954	79639544
XIII	92.951	PMZ_0002778	scaffold_68	632706	656009	+		chr4	81264297	81282477
XIII	92.951	PMZ_0002779	scaffold_68	658437	662805	+		chr4	88728701	88728883
XIII	92.951	PMZ_0002760	scaffold_68	60529	64426	-		chr5	397554	396391
XIII	92.951	PMZ_0002767	scaffold_68	318472	320847	+		chr6	21939014	21939160
XIII	92.951	PMZ_0002769	scaffold_68	349656	376947	+		chr6	21945729	21949230
XIII	92.951	PMZ_0002771	scaffold_68	431365	484254	-		chr6	22209874	22180730
XIII	92.951	PMZ_0002773	scaffold_68	493305	498956	-		chr6	22277227	22273758
XIII	92.951	PMZ_0002772	scaffold_68	485434	515226	+		chr7	29841284	29840910
XIII	92.951	PMZ_0002781	scaffold_68	672846	677275	-		chr8	20314178	20309677
XIII	92.951	PMZ_0002769	scaffold_68	349656	376947	+		chrZ	45266258	45265711
XIII	97.808	PMZ_0001205	scaffold_92	1011670	1019403	+		chr1	193298489	193311961
XIII	97.808	PMZ_0001179	scaffold_92	392354	396451	-		chr2	6191461	6190772
XIII	97.808	PMZ_0001186	scaffold_92	608964	612152	+		chr21	6555272	6548956
XIII	97.808	PMZ_0001203	scaffold_92	967762	975404	+		chr3	80532077	80561070
XIII	97.808	PMZ_0001206	scaffold_92	1030671	1045446	+		chr3	7628473	7616697
XIII	97.808	PMZ_0001165	scaffold_92	666	6899	-		chr4	87567580	87549792
XIII	97.808	PMZ_0001169	scaffold_92	31862	36572	-		chr4	93260500	93260982
XIII	97.808	PMZ_0001168	scaffold_92	21437	30903	-		chr5	38544470	38549543
XIII	97.808	PMZ_0001184	scaffold_92	585483	597289	+		chr5	40332156	40331719
XIII	97.808	PMZ_0001185	scaffold_92	594027	605555	-		chr5	48537705	48542088
XIII	97.808	PMZ_0001199	scaffold_92	935921	940001	-		chr5	52731667	52732488
XIII	97.808	PMZ_0001202	scaffold_92	963206	965141	-		chr5	52734597	52735497
XIII	97.808	PMZ_0001206	scaffold_92	1030671	1045446	+		chr5	27482126	27471796
XIII	97.808	PMZ_0001170	scaffold_92	107326	144213	+		chr6	23974516	23992841
XIII	97.808	PMZ_0001171	scaffold_92	162977	172398	+		chr6	23995835	23999873
XIII	97.808	PMZ_0001174	scaffold_92	213430	223570	+		chr6	24016277	24019829
XIII	97.808	PMZ_0001191	scaffold_92	765156	772770	+		chr9	5808647	5804757
XIII	106.547	PMZ_0013952	scaffold_1738	1325	3777	-		chr4	94205599	94205210
XIII	106.547	PMZ_0013953	scaffold_1738	40030	42125	-		chr4	94209802	94209222
XIII	106.547	PMZ_0013952	scaffold_1738	1325	3777	-		chr6	21618313	21618566
XIII	107.275	PMZ_0005877	scaffold_969	188403	206765	-		chr13	3747695	3733436
XIII	107.275	PMZ_0005878	scaffold_969	208913	219356	-		chr22	866183	862839
XIII	107.275	PMZ_0005878	scaffold_969	208913	219356	-		chr6	35061658	35071612
XIII	110.399	PMZ_0007733	scaffold_820	8662	8937	-		chr1	57797141	57797320
XIII	110.399	PMZ_0010206	scaffold_1226	93506	114446	+		chr10	19650576	19680083
XIII	110.399	PMZ_0008659	scaffold_1870	183064	199514	-		chr10	7941611	7948371
XIII	110.399	PMZ_0008658	scaffold_1870	163065	177555	-		chr13	18574755	18585461
XIII	110.399	PMZ_0003478	scaffold_1200	533555	544244	+		chr13	9142235	9142038
XIII	110.399	PMZ_0008636	scaffold_856	195813	198820	+		chr14	6079760	6080164
XIII	110.399	PMZ_0003478	scaffold_1200	533555	544244	+		chr22	1146898	1147134
XIII	110.399	PMZ_0003479	scaffold_1200	541753	569001	-		chr25	872506	872129
XIII	110.399	PMZ_0003464	scaffold_1200	650	2733	-		chr4	85622509	85621012
XIII	110.399	PMZ_0008630	scaffold_856	14685	48814	+		chr4	85539585	85502272
XIII	110.399	PMZ_0010209	scaffold_1226	138236	148990	+		chr4	88716397	88714774
XIII	110.399	PMZ_0003465	scaffold_1200	144332	151309	-		chr4	85165024	85155003
XIII	110.399	PMZ_0003467	scaffold_1200	160025	162556	-		chr4	85182407	85178719
XIII	110.399	PMZ_0003470	scaffold_1200	169139	171885	-		chr4	85196420	85193322
XIII	110.399	PMZ_0008633	scaffold_856	171433	182061	-		chr4	85033388	85017861
XIII	110.399	PMZ_0008637	scaffold_856	200189	201667	-		chr4	85144264	85144058
XIII	110.399	PMZ_0003478	scaffold_1200	533555	544244	+		chr5	39015327	39015154
XIII	110.399	PMZ_0008658	scaffold_1870	163065	177555	-		chr6	36901527	36897446
XIII	110.399	PMZ_0007737	scaffold_820	194631	202087	-		chr6	24801626	24813864
XIII	110.399	PMZ_0007733	scaffold_820	8662	8937	-		chr7	29812460	29812275
XIII	110.399	PMZ_0007733	scaffold_820	8662	8937	-		chr9	24415597	24415409
XIII	110.399	PMZ_0010207	scaffold_1226	115663	129147	-		chrZ	43964058	43947088
XIII	112.294	PMZ_0020188	scaffold_7669	274	9261	-		chr6	31825281	31826311
XIV	0	PMZ_0007835	scaffold_1786	16539	27132	-		chr1	586263	589940
XIV	0	PMZ_0007836	scaffold_1786	35231	42783	+		chr10	6011478	6025109
XIV	0	PMZ_0007838	scaffold_1786	52039	58498	+		chr10	21906244	21906080
[truncated: 3,729 more rows]
