# Supplementary material for: The sea lamprey meiotic map improves resolution of ancient vertebrate genome duplications
Source: HighWire-hosted journal article supplement (doi:10.1101/gr.184135.114), 2015-06-05
Supplement: Supplemental_Table_S3.xlsx [file Supplemental_Table_S3.xlsx]

## Sheet: Human
Table S3 - The lamprey/human comparative map.
Linkage	Position	Lamprey Genomic Alignment						Human Genomic Alignment
Group	(cM)	Gene	Scaffold	Start	End	Direction		Chromosome	Start	End
I	5.379	PMZ_0000232	scaffold_270	1691400	1708513	+		chr1	32209944	32208428
I	5.379	PMZ_0000236	scaffold_270	1802897	1804892	+		chr1	32206142	32205510
I	5.379	PMZ_0000237	scaffold_270	1825517	1843560	-		chr1	38082324	38079374
I	5.379	PMZ_0000191	scaffold_270	426374	430421	+		chr1	35321578	35321315
I	5.379	PMZ_0000206	scaffold_270	786219	789252	-		chr1	28316323	28315008
I	5.379	PMZ_0000207	scaffold_270	894070	907892	-		chr1	150876372	150876686
I	5.379	PMZ_0000184	scaffold_270	37052	37523	-		chr10	22896954	22896856
I	5.379	PMZ_0000199	scaffold_270	591313	607819	+		chr10	21115477	21108353
I	5.379	PMZ_0000239	scaffold_270	1878157	1884915	+		chr11	124517395	124506898
I	5.379	PMZ_0000184	scaffold_270	37052	37523	-		chr12	57988907	57989002
I	5.379	PMZ_0000208	scaffold_270	901283	953130	+		chr15	42446657	42446514
I	5.379	PMZ_0000184	scaffold_270	37052	37523	-		chr17	36940594	36940496
I	5.379	PMZ_0000201	scaffold_270	611732	614920	+		chr18	3086128	3083786
I	5.379	PMZ_0000212	scaffold_270	1051072	1090653	-		chr2	216245807	216230217
I	5.379	PMZ_0000213	scaffold_270	1109605	1128344	-		chr2	216257924	216249578
I	5.379	PMZ_0000219	scaffold_270	1220520	1262034	-		chr2	216259413	216257700
I	5.379	PMZ_0000223	scaffold_270	1396167	1432722	-		chr2	216288226	216286818
I	5.379	PMZ_0000224	scaffold_270	1450326	1458310	-		chr2	216296685	216289815
I	5.379	PMZ_0000225	scaffold_270	1481750	1499483	-		chr2	216299557	216298048
I	5.379	PMZ_0000185	scaffold_270	170562	182026	+		chr2	152222566	152226766
I	5.379	PMZ_0000197	scaffold_270	541804	548389	+		chr2	152374945	152370829
I	5.379	PMZ_0000206	scaffold_270	786219	789252	-		chr20	45808445	45809586
I	5.379	PMZ_0000246	scaffold_270	2379668	2382096	-		chr3	186274342	186272042
I	5.379	PMZ_0000238	scaffold_270	1865823	1874958	-		chr4	128813522	128813671
I	5.379	PMZ_0000240	scaffold_270	1899612	1902823	-		chr4	128803001	128804707
I	5.379	PMZ_0000220	scaffold_270	1332012	1343001	-		chr6	135318102	135287464
I	5.379	PMZ_0000230	scaffold_270	1613225	1630672	+		chr6	69348568	69349179
I	5.379	PMZ_0000190	scaffold_270	411963	413384	+		chr6	73107968	73110413
I	5.379	PMZ_0000204	scaffold_270	715956	731742	+		chr6	134494498	134491916
I	5.379	PMZ_0000206	scaffold_270	786219	789252	-		chr6	133836449	133844341
I	5.379	PMZ_0000207	scaffold_270	894070	907892	-		chr7	25163738	25163323
I	5.379	PMZ_0000229	scaffold_270	1599820	1601867	+		chr8	6338224	6338400
I	5.379	PMZ_0000231	scaffold_270	1634477	1663688	-		chr8	6390008	6360625
I	5.379	PMZ_0000232	scaffold_270	1691400	1708513	+		chr8	143558489	143558909
I	5.379	PMZ_0000234	scaffold_270	1759784	1767119	+		chr8	6588225	6614894
I	5.379	PMZ_0000244	scaffold_270	1988849	1997939	+		chr8	143624956	143625775
I	5.379	PMZ_0000190	scaffold_270	411963	413384	+		chr8	105261732	105264045
I	5.379	PMZ_0000193	scaffold_270	444373	445751	+		chr8	2005792	2007367
I	10.847	PMZ_0002691	scaffold_35	668178	683018	+		chr1	40529905	40537202
I	10.847	PMZ_0002684	scaffold_35	7156	14493	+		chr14	73759582	73750847
I	10.847	PMZ_0002685	scaffold_35	22635	34879	+		chr2	55844421	55795309
I	10.847	PMZ_0002686	scaffold_35	44496	45647	-		chr2	5832968	5834173
I	10.847	PMZ_0002687	scaffold_35	372324	374819	+		chr20	30193392	30193532
I	10.847	PMZ_0002688	scaffold_35	594258	599182	+		chr20	32298561	32295521
I	10.847	PMZ_0002689	scaffold_35	610483	634987	+		chr20	55966707	55967835
I	10.847	PMZ_0002687	scaffold_35	372324	374819	+		chr3	62110171	62110034
I	10.847	PMZ_0002691	scaffold_35	668178	683018	+		chr3	76483484	76484576
I	10.847	PMZ_0002687	scaffold_35	372324	374819	+		chr6	19838184	19838321
I	10.847	PMZ_0002686	scaffold_35	44496	45647	-		chr6	21594766	21596184
I	10.847	PMZ_0002689	scaffold_35	610483	634987	+		chr6	17281813	17283161
I	14.296	PMZ_0011365	scaffold_737	82882	89967	+		chr1	36025951	36031252
I	14.296	PMZ_0002920	scaffold_1128	617708	631831	-		chr11	130331981	130343284
I	14.296	PMZ_0002913	scaffold_1128	155434	172302	+		chr12	96421344	96421219
I	14.296	PMZ_0002914	scaffold_1128	173407	191222	+		chr12	96408783	96407540
I	14.296	PMZ_0002916	scaffold_1128	261027	267305	+		chr12	96412672	96412529
I	14.296	PMZ_0011363	scaffold_737	65678	73915	-		chr22	51021102	51017843
I	14.296	PMZ_0002918	scaffold_1128	338681	352687	-		chr3	47663831	47663691
I	14.296	PMZ_0002919	scaffold_1128	363203	372475	-		chr3	126071033	126062609
I	14.296	PMZ_0011361	scaffold_737	30413	37279	+		chr6	34949467	34950993
I	14.296	PMZ_0011362	scaffold_737	45259	62620	+		chr6	35047329	35053716
I	14.296	PMZ_0011360	scaffold_737	9335	45187	-		chr6	34949742	34949551
I	14.296	PMZ_0020684	scaffold_8537	1570	10572	+		chr8	59411027	59404043
I	16.021	PMZ_0005484	scaffold_133	103653	111462	+		chr1	233971996	233971838
I	16.021	PMZ_0005484	scaffold_133	103653	111462	+		chr10	87468724	87468912
I	16.021	PMZ_0005488	scaffold_133	338767	340251	-		chr11	119360918	119361394
I	16.021	PMZ_0005480	scaffold_133	42688	44586	-		chr17	39966081	39964114
I	16.021	PMZ_0005482	scaffold_133	79159	94572	+		chr17	18206035	18181008
I	16.021	PMZ_0005486	scaffold_133	178380	184567	-		chr2	1926577	1926050
I	16.021	PMZ_0005477	scaffold_133	1902	25374	-		chr2	21364240	21364659
I	16.021	PMZ_0005485	scaffold_133	137788	144381	-		chr20	62844885	62850379
I	16.021	PMZ_0005480	scaffold_133	42688	44586	-		chr3	33171427	33174189
I	19.471	PMZ_0004589	scaffold_137	101802	109912	-		chr10	93878652	93878918
I	19.471	PMZ_0004589	scaffold_137	101802	109912	-		chr11	17457488	17457222
I	19.471	PMZ_0004588	scaffold_137	37224	41626	-		chr11	120198196	120201152
I	19.471	PMZ_0004596	scaffold_137	250685	255290	+		chr12	13366620	13367622
I	19.471	PMZ_0004597	scaffold_137	411727	419084	+		chr12	14019001	14018726
I	19.471	PMZ_0004598	scaffold_137	426228	432620	+		chr12	13906840	13906298
I	19.471	PMZ_0004594	scaffold_137	171129	177531	+		chr16	17235228	17211510
I	19.471	PMZ_0004595	scaffold_137	189238	199946	+		chr16	10868952	10865530
I	19.471	PMZ_0004597	scaffold_137	411727	419084	+		chr16	10274088	10273849
I	19.471	PMZ_0004589	scaffold_137	101802	109912	-		chr17	1761602	1761387
I	19.471	PMZ_0004591	scaffold_137	136917	138280	+		chr17	17394591	17394803
I	19.471	PMZ_0004594	scaffold_137	171129	177531	+		chr17	48432290	48435900
I	19.471	PMZ_0004595	scaffold_137	189238	199946	+		chr17	15457142	15443735
I	19.471	PMZ_0004598	scaffold_137	426228	432620	+		chr17	72848741	72847713
I	19.471	PMZ_0004599	scaffold_137	436856	453686	+		chr17	72846497	72840451
I	19.471	PMZ_0004596	scaffold_137	250685	255290	+		chr19	48832605	48833724
I	19.471	PMZ_0004599	scaffold_137	436856	453686	+		chr19	48918149	48945597
I	19.471	PMZ_0004592	scaffold_137	142995	158434	+		chr2	106961181	106961693
I	19.471	PMZ_0004592	scaffold_137	142995	158434	+		chr6	34622558	34614379
I	32.844	PMZ_0009062	scaffold_5895	170885	181718	-		chr1	32852544	32849431
I	32.844	PMZ_0009061	scaffold_5895	147910	157014	+		chr6	112382275	112382469
I	35.122	PMZ_0021241	scaffold_9751	632	10353	+		chr11	125255481	125267955
I	35.122	PMZ_0021241	scaffold_9751	632	10353	+		chr17	20492762	20493541
I	35.122	PMZ_0021241	scaffold_9751	632	10353	+		chr21	44430197	44433375
I	43.957	PMZ_0015669	scaffold_2766	968	21835	+		chr11	61099167	61070037
I	43.957	PMZ_0005060	scaffold_577	33192	38753	-		chr12	12673954	12672794
I	43.957	PMZ_0005062	scaffold_577	347557	381571	+		chr12	69233456	69233623
I	45.745	PMZ_0015936	scaffold_2919	7874	26460	+		chr1	114483525	114500903
I	45.745	PMZ_0016470	scaffold_3546	20700	32214	-		chr10	11797404	11805525
I	45.745	PMZ_0016468	scaffold_3546	121	14889	+		chr11	34192536	34182459
I	45.745	PMZ_0013483	scaffold_1582	4230	47452	+		chr12	22659753	22624820
I	45.745	PMZ_0013484	scaffold_1582	52499	54865	-		chr12	5603813	5604070
I	45.745	PMZ_0016468	scaffold_3546	121	14889	+		chr12	108004049	108013941
I	45.745	PMZ_0008086	scaffold_1142	148553	165610	-		chr19	5211770	5210651
I	45.745	PMZ_0008086	scaffold_1142	148553	165610	-		chr9	8341226	8340328
I	47.47	PMZ_0011867	scaffold_1141	45776	48699	-		chr16	681317	684054
I	47.47	PMZ_0011867	scaffold_1141	45776	48699	-		chr17	48913407	48918359
I	48.937	PMZ_0008017	scaffold_989	197326	199797	+		chr16	675429	677433
I	48.937	PMZ_0008017	scaffold_989	197326	199797	+		chr17	80617536	80615919
I	48.937	PMZ_0008018	scaffold_989	203903	211659	-		chr17	81051994	81052317
I	48.937	PMZ_0008016	scaffold_989	28041	29989	+		chr17	7530360	7529777
I	48.937	PMZ_0008017	scaffold_989	197326	199797	+		chrX	102192508	102192903
I	50.891	PMZ_0010609	scaffold_498	28914	71446	+		chr16	2103340	2129672
I	50.891	PMZ_0010608	scaffold_498	6200	13219	+		chr16	339576	338125
I	50.891	PMZ_0010610	scaffold_498	78185	89166	+		chr16	2134950	2138329
I	50.891	PMZ_0010608	scaffold_498	6200	13219	+		chr17	63530139	63526097
I	50.891	PMZ_0018322	scaffold_7651	15796	19146	+		chr6	133013730	133005471
I	53.51	PMZ_0011147	scaffold_5289	49773	54123	+		chr2	131103928	131104038
I	53.51	PMZ_0011149	scaffold_5289	60610	64096	+		chr2	131103008	131103301
I	53.51	PMZ_0011145	scaffold_5289	4086	8938	+		chr4	16258127	16257940
I	61.368	PMZ_0009080	scaffold_1330	167491	184934	+		chr2	27440744	27462342
I	61.368	PMZ_0009871	scaffold_1579	108814	120466	-		chr20	61572855	61576261
I	61.368	PMZ_0009872	scaffold_1579	145941	162829	+		chr20	62559702	62560878
I	61.368	PMZ_0009079	scaffold_1330	55658	59084	-		chr9	139944499	139944753
I	63.092	PMZ_0011985	scaffold_2454	15680	27153	+		chr10	81923164	81915612
I	63.092	PMZ_0015233	scaffold_3097	28560	32984	-		chr5	140782616	140783038
I	63.092	PMZ_0017570	scaffold_4255	10882	25470	+		chr5	156723660	156755058
I	63.092	PMZ_0015233	scaffold_3097	28560	32984	-		chrX	91090600	91091037
I	64.817	PMZ_0007955	scaffold_963	137755	167493	-		chr6	12121166	12131174
I	74.053	PMZ_0009883	scaffold_3052	13269	24545	+		chrX	48336436	48341101
I	76.94	PMZ_0010522	scaffold_536	82132	89044	+		chr6	132272057	132270407
I	76.94	PMZ_0010523	scaffold_536	90555	102341	-		chr8	120583088	120569764
I	82.943	PMZ_0010352	scaffold_398	84613	85016	-		chr1	228494646	228494864
I	82.943	PMZ_0003044	scaffold_13	592263	598513	-		chr11	86103582	86103794
I	82.943	PMZ_0003038	scaffold_13	293649	298234	-		chr12	108912182	108913219
I	82.943	PMZ_0003039	scaffold_13	303857	308459	+		chr12	49987871	49988041
I	82.943	PMZ_0010349	scaffold_398	4285	11479	+		chr19	55831840	55828170
I	82.943	PMZ_0010352	scaffold_398	84613	85016	-		chr2	179489426	179489166
I	82.943	PMZ_0003035	scaffold_13	11783	13045	+		chr20	825994	826308
I	82.943	PMZ_0003041	scaffold_13	346095	348636	-		chr6	154410971	154412601
I	82.943	PMZ_0010350	scaffold_398	44300	60028	+		chr6	10877634	10876196
I	82.943	PMZ_0010353	scaffold_398	91750	111492	+		chr6	52906034	52880881
I	82.943	PMZ_0003035	scaffold_13	11783	13045	+		chr8	59059540	59059872
I	82.943	PMZ_0003039	scaffold_13	303857	308459	+		chr8	101163584	101164155
I	82.943	PMZ_0003041	scaffold_13	346095	348636	-		chr8	54147661	54141869
I	82.943	PMZ_0003040	scaffold_13	319604	336035	+		chr9	33624419	33625267
I	87.163	PMZ_0005070	scaffold_97	40933	54651	-		chr1	100733715	100741280
I	87.163	PMZ_0005071	scaffold_97	56816	74406	+		chr2	15735262	15771027
I	109.005	PMZ_0005936	scaffold_393	114845	124720	-		chr12	12976134	12976950
I	109.005	PMZ_0006212	scaffold_91	187538	197964	-		chr12	14949938	14947907
I	109.005	PMZ_0005938	scaffold_393	166831	183051	+		chr15	77906887	77908083
I	109.005	PMZ_0005939	scaffold_393	170950	172912	-		chr15	77908134	77906416
I	109.005	PMZ_0005935	scaffold_393	97449	101149	-		chr16	19884107	19883136
I	109.005	PMZ_0004128	scaffold_115	144836	146134	+		chr17	21318655	21319953
I	109.005	PMZ_0004127	scaffold_115	6206	41225	+		chr17	21203854	21217539
I	109.005	PMZ_0005935	scaffold_393	97449	101149	-		chr17	72436003	72436968
I	109.005	PMZ_0006214	scaffold_91	213337	224490	-		chr17	79990264	79991657
I	109.005	PMZ_0006215	scaffold_91	228845	253028	-		chr17	79580555	79534443
I	109.005	PMZ_0006211	scaffold_91	64292	74626	+		chr17	74136392	74133536
I	109.005	PMZ_0004128	scaffold_115	144836	146134	+		chr22	38824068	38822803
I	109.005	PMZ_0013683	scaffold_8734	49890	56339	+		chr3	139065725	139074635
I	109.005	PMZ_0006214	scaffold_91	213337	224490	-		chr4	46726389	46725850
I	109.005	PMZ_0006214	scaffold_91	213337	224490	-		chr7	6431556	6442074
I	109.005	PMZ_0005939	scaffold_393	170950	172912	-		chr9	27950648	27948855
I	109.005	PMZ_0006214	scaffold_91	213337	224490	-		chrX	136523950	136523420
I	119.603	PMZ_0014253	scaffold_1957	21104	27358	+		chr15	102190332	102182685
I	119.603	PMZ_0014255	scaffold_1957	44058	50547	-		chr15	55632807	55647594
I	119.603	PMZ_0014254	scaffold_1957	34791	42895	+		chrX	12903703	12906729
I	123.053	PMZ_0011259	scaffold_700	78501	82464	-		chr11	119212665	119212285
I	123.053	PMZ_0006253	scaffold_1086	255175	265620	-		chr13	23808747	23808848
I	123.053	PMZ_0012915	scaffold_1285	10016	16056	-		chr16	15771649	15781373
I	123.053	PMZ_0012917	scaffold_1285	60859	61080	+		chr16	4664798	4664676
I	123.053	PMZ_0011276	scaffold_1829	14215	35775	-		chr19	917545	920547
I	123.053	PMZ_0011277	scaffold_1829	83835	95574	+		chr19	36045979	36041734
I	123.053	PMZ_0011262	scaffold_700	94824	96850	-		chr2	236473533	236473198
I	123.053	PMZ_0011257	scaffold_700	48424	69581	-		chr21	43277437	43243644
I	123.053	PMZ_0012914	scaffold_1285	46	4717	+		chr3	39431930	39438008
I	123.053	PMZ_0022629	scaffold_13900	2326	6044	-		chr4	171008419	170991744
I	123.053	PMZ_0006252	scaffold_1086	239869	251508	+		chr5	34914949	34908900
I	123.053	PMZ_0006253	scaffold_1086	255175	265620	-		chr8	13960013	13959840
I	128.355	PMZ_0005836	scaffold_229	207011	218432	+		chr1	32740917	32741275
I	128.355	PMZ_0005845	scaffold_229	331250	339080	-		chr1	28289988	28293555
I	128.355	PMZ_0005834	scaffold_229	85365	91864	-		chr1	68708738	68708160
I	128.355	PMZ_0005834	scaffold_229	85365	91864	-		chr13	22203154	22202573
I	128.355	PMZ_0005840	scaffold_229	298545	306153	+		chr16	18810156	18804577
I	128.355	PMZ_0005831	scaffold_229	9406	16413	-		chr16	20873656	20871262
I	128.355	PMZ_0005834	scaffold_229	85365	91864	-		chr17	26794840	26795421
I	128.355	PMZ_0005835	scaffold_229	145792	170416	+		chr18	751811	724427
I	128.355	PMZ_0005837	scaffold_229	220805	244070	+		chr18	745855	724442
I	128.355	PMZ_0005838	scaffold_229	258005	270519	-		chr2	27728588	27729474
I	128.355	PMZ_0005835	scaffold_229	145792	170416	+		chr20	36014477	36031779
I	128.355	PMZ_0005836	scaffold_229	207011	218432	+		chr20	36022302	36022700
I	128.355	PMZ_0005837	scaffold_229	220805	244070	+		chr20	30671699	30689307
I	128.355	PMZ_0005833	scaffold_229	54099	80455	-		chr20	30720828	30743001
I	128.355	PMZ_0009480	scaffold_2221	140525	161082	-		chr22	40717046	40718933
I	128.355	PMZ_0005835	scaffold_229	145792	170416	+		chr22	26043494	26045199
I	128.355	PMZ_0005841	scaffold_229	313236	320169	+		chr7	99031041	99017707
I	128.355	PMZ_0005836	scaffold_229	207011	218432	+		chr8	11406537	11407815
I	135.68	PMZ_0016510	scaffold_6698	22287	31492	-		chr1	202304885	202302362
I	135.68	PMZ_0018420	scaffold_5192	19914	20768	-		chr11	102207651	102207827
I	135.68	PMZ_0018418	scaffold_5192	974	12570	+		chr16	2024760	2027303
I	135.68	PMZ_0016509	scaffold_6698	6116	14807	-		chr22	39120301	39124166
I	146.304	PMZ_0022218	scaffold_12410	484	6398	-		chr19	54966574	54966744
I	148.028	PMZ_0011693	scaffold_1026	7879	9829	+		chr17	29249966	29253934
I	148.028	PMZ_0011695	scaffold_1026	33035	43144	+		chr22	38935416	38933599
I	148.028	PMZ_0011696	scaffold_1026	46550	54900	-		chr22	39135434	39132278
I	148.028	PMZ_0011694	scaffold_1026	13002	23451	+		chr7	944807	938674
I	148.028	PMZ_0011696	scaffold_1026	46550	54900	-		chr7	905588	912956
I	148.028	PMZ_0011699	scaffold_1026	72407	85902	-		chr7	769302	796604
I	153.331	PMZ_0001448	scaffold_2826	26937	35476	-		chr1	158058119	158061348
I	153.331	PMZ_0001450	scaffold_2826	380970	392891	+		chr11	126138699	126133817
I	153.331	PMZ_0001458	scaffold_2826	783482	788526	-		chr11	124739841	124740191
I	153.331	PMZ_0001451	scaffold_2826	459253	459572	+		chr13	19412249	19412096
I	153.331	PMZ_0001451	scaffold_2826	459253	459572	+		chr18	14221986	14222150
I	153.331	PMZ_0001470	scaffold_2826	979140	983123	-		chr19	51850318	51850085
I	153.331	PMZ_0001451	scaffold_2826	459253	459572	+		chr21	15309658	15309503
I	153.331	PMZ_0001453	scaffold_2826	641104	707493	+		chr3	77595488	77638146
I	153.331	PMZ_0001457	scaffold_2826	754330	765975	-		chr3	78719455	78710220
I	153.331	PMZ_0001458	scaffold_2826	783482	788526	-		chr3	77542379	77542528
I	160.634	PMZ_0003258	scaffold_167	389704	401187	-		chr11	118939941	118952327
I	160.634	PMZ_0003253	scaffold_167	331142	353625	-		chr19	44058959	44047550
I	160.634	PMZ_0003256	scaffold_167	372270	378499	-		chr19	36159365	36166927
I	160.634	PMZ_0003259	scaffold_167	489654	490641	+		chr19	42863265	42863378
I	160.634	PMZ_0003255	scaffold_167	361382	370236	+		chr21	45053302	45050204
I	160.634	PMZ_0003256	scaffold_167	372270	378499	-		chr3	118906631	118913227
I	162.376	PMZ_0011889	scaffold_948	69910	78650	+		chr11	8009164	8016914
I	162.376	PMZ_0011885	scaffold_948	13075	19367	-		chr17	77704956	77711052
I	162.376	PMZ_0011886	scaffold_948	21629	31081	-		chr17	29855626	29857490
I	162.376	PMZ_0011889	scaffold_948	69910	78650	+		chr2	58478851	58479582
I	175.413	PMZ_0013331	scaffold_1516	1342	1458	+		chr18	31432922	31432809
I	175.413	PMZ_0013331	scaffold_1516	1342	1458	+		chr20	31035515	31035402
I	180.707	PMZ_0010656	scaffold_517	79422	83348	+		chr1	31845861	31840240
I	180.707	PMZ_0010650	scaffold_517	3686	10075	+		chr13	31037817	31036675
I	180.707	PMZ_0010655	scaffold_517	67831	75392	+		chr20	58416450	58420324
I	180.707	PMZ_0010651	scaffold_517	13074	31485	+		chr4	170608809	170634447
I	180.707	PMZ_0010653	scaffold_517	32677	35719	+		chr4	184365942	184366796
I	180.707	PMZ_0010650	scaffold_517	3686	10075	+		chr4	174254800	174253972
I	180.707	PMZ_0010653	scaffold_517	32677	35719	+		chr5	133747521	133745594
I	180.707	PMZ_0010657	scaffold_517	105669	110430	+		chr6	123318923	123332307
I	180.707	PMZ_0010655	scaffold_517	67831	75392	+		chr6	13283651	13286452
I	180.707	PMZ_0010656	scaffold_517	79422	83348	+		chr6	123100940	123102339
I	180.707	PMZ_0010651	scaffold_517	13074	31485	+		chrX	10162986	10188930
I	180.707	PMZ_0010652	scaffold_517	26949	27243	-		chrX	49854957	49854765
I	180.733	PMZ_0006802	scaffold_1361	66450	67484	+		chr17	71282639	71281962
I	180.733	PMZ_0006802	scaffold_1361	66450	67484	+		chr22	37962435	37962563
I	180.733	PMZ_0006807	scaffold_1361	240291	257896	+		chr7	2695705	2696193
I	184.272	PMZ_0017050	scaffold_3808	7295	12085	-		chr2	220072048	220072728
II	3.45	PMZ_0004884	scaffold_2090	368502	383091	-		chr1	31766195	31734377
II	3.45	PMZ_0004885	scaffold_2090	389634	404914	-		chr16	23464315	23415012
II	3.45	PMZ_0004886	scaffold_2090	413537	415935	+		chr17	9808497	9801439
II	3.45	PMZ_0004880	scaffold_2090	186400	190398	+		chr2	27258461	27259655
II	3.45	PMZ_0004881	scaffold_2090	190589	192223	+		chr2	27259946	27260576
II	3.45	PMZ_0004877	scaffold_2090	32092	64714	+		chr2	26461888	26414125
II	10.753	PMZ_0013440	scaffold_2029	19641	35940	+		chr1	32495895	32502570
II	10.753	PMZ_0015986	scaffold_3254	33920	35704	+		chr2	11052817	11053764
II	14.212	PMZ_0009392	scaffold_7747	1704	27564	+		chr8	124790896	124821254
II	14.212	PMZ_0009393	scaffold_7747	28561	49931	-		chr8	11666306	11689182
II	15.945	PMZ_0011960	scaffold_1447	20830	40202	-		chr13	25670337	25672013
II	15.945	PMZ_0011961	scaffold_1447	48656	55605	+		chr15	101169746	101170033
II	15.945	PMZ_0011959	scaffold_1447	1218	14504	+		chr2	27303035	27308862
II	15.945	PMZ_0011960	scaffold_1447	20830	40202	-		chr20	43538785	43559367
II	15.945	PMZ_0011960	scaffold_1447	20830	40202	-		chr8	101733811	101721377
II	16.808	PMZ_0006580	scaffold_265	155880	170381	+		chr14	34243543	34263230
II	16.808	PMZ_0006582	scaffold_265	208561	215734	-		chr6	169051348	169053889
II	19.395	PMZ_0013669	scaffold_3365	40931	54112	-		chr1	115078805	115080463
II	19.395	PMZ_0013669	scaffold_3365	40931	54112	-		chr15	72502822	72495362
II	19.395	PMZ_0013669	scaffold_3365	40931	54112	-		chr6	5972837	5974239
II	19.395	PMZ_0013668	scaffold_3365	21331	37629	-		chr8	70594589	70585449
II	24.569	PMZ_0019747	scaffold_6944	4	11315	-		chr8	67578911	67576479
II	28.019	PMZ_0017266	scaffold_4036	12094	17589	-		chr20	61982351	61978093
II	28.019	PMZ_0017266	scaffold_4036	12094	17589	-		chr8	27321482	27319149
II	29.744	PMZ_0016070	scaffold_3142	419	8061	-		chr8	72968087	72964833
II	37.757	PMZ_0015807	scaffold_3274	19790	35692	-		chr6	134301264	134305811
II	39.126	PMZ_0018641	scaffold_6442	2566	14857	+		chr6	134494695	134491415
II	40.579	PMZ_0018116	scaffold_5169	1411	13829	+		chr6	126248806	126249376
II	41.838	PMZ_0013319	scaffold_1568	23584	56139	+		chr2	27351309	27353591
II	41.838	PMZ_0013317	scaffold_1568	34	7748	-		chr8	126096140	126090989
II	44.596	PMZ_0016259	scaffold_3791	22806	33557	-		chr1	26448343	26449017
II	44.596	PMZ_0016259	scaffold_3791	22806	33557	-		chr20	2097311	2097988
II	47.355	PMZ_0011239	scaffold_691	1716	83673	+		chr2	26712659	26688536
II	47.355	PMZ_0011721	scaffold_1795	39847	51030	-		chr8	145024874	145024539
II	47.355	PMZ_0014221	scaffold_1906	5069	49717	+		chr8	145012408	145004311
II	47.355	PMZ_0011240	scaffold_691	93651	101442	-		chr8	144996056	144995337
II	50.822	PMZ_0011578	scaffold_840	42125	48702	+		chr1	39719967	39723700
II	50.822	PMZ_0011578	scaffold_840	42125	48702	+		chr6	56566763	56564451
II	50.822	PMZ_0011581	scaffold_840	81268	91619	+		chr6	56504858	56498927
II	50.822	PMZ_0011577	scaffold_840	10604	37667	+		chr8	145012861	145012319
II	50.822	PMZ_0011579	scaffold_840	59110	70028	+		chr8	145010191	145008485
II	50.822	PMZ_0011581	scaffold_840	81268	91619	+		chr8	145007278	145004083
II	54.846	PMZ_0017520	scaffold_4244	12	2207	+		chr1	40226243	40226094
II	54.846	PMZ_0017520	scaffold_4244	12	2207	+		chr20	55746170	55746018
II	54.846	PMZ_0017520	scaffold_4244	12	2207	+		chr6	55620483	55620334
II	57.109	PMZ_0013422	scaffold_1499	18688	32309	-		chr8	105257143	105264045
II	63.17	PMZ_0010301	scaffold_475	10648	14106	-		chr3	58279313	58279459
II	63.17	PMZ_0010299	scaffold_475	39	4064	+		chrX	153207104	153200802
II	80.462	PMZ_0013516	scaffold_1552	2131	7376	-		chr8	3166032	3165213
II	80.462	PMZ_0013518	scaffold_1552	27070	54571	-		chr8	3253875	3200817
II	81.325	PMZ_0011564	scaffold_1229	4460	13486	+		chr1	34100931	34099020
II	81.325	PMZ_0011564	scaffold_1229	4460	13486	+		chr8	3063167	3059168
II	81.325	PMZ_0011566	scaffold_1229	88938	91329	+		chr8	113349086	113347556
II	88.235	PMZ_0022842	scaffold_14681	2046	5519	+		chr18	21422362	21425089
II	88.235	PMZ_0022842	scaffold_14681	2046	5519	+		chr20	60905646	60904196
II	92.726	PMZ_0013264	scaffold_1469	2500	61878	-		chr8	29018387	28997985
II	96.378	PMZ_0003982	scaffold_423	173206	201698	+		chr1	67438579	67442403
II	96.378	PMZ_0003981	scaffold_423	20558	24201	+		chr1	57002779	57002621
II	96.378	PMZ_0011129	scaffold_750	57624	64268	-		chr13	53616117	53624882
II	96.378	PMZ_0003983	scaffold_423	230767	254808	+		chr2	27430452	27426099
II	96.378	PMZ_0003988	scaffold_423	316606	329821	-		chr6	12121214	12124336
II	96.378	PMZ_0011132	scaffold_750	93831	104416	-		chr6	73900294	73902423
II	96.378	PMZ_0020404	scaffold_7880	2111	3637	-		chr6	75839947	75838013
II	96.378	PMZ_0020405	scaffold_7880	4937	13232	-		chr6	75855171	75848165
II	96.378	PMZ_0003984	scaffold_423	260338	273924	+		chr8	126015490	126034184
II	123.075	PMZ_0003131	scaffold_300	579717	602380	+		chr11	7694047	7686608
II	123.075	PMZ_0003131	scaffold_300	579717	602380	+		chr22	43027459	43015812
II	123.075	PMZ_0003123	scaffold_300	634	4191	+		chr7	37988446	37988661
II	134.494	PMZ_0008773	scaffold_2070	146892	154642	+		chr9	34371099	34370812
II	136.219	PMZ_0018728	scaffold_24957	17092	19389	-		chr11	1862258	1862434
II	136.219	PMZ_0018728	scaffold_24957	17092	19389	-		chr19	55666234	55665401
II	136.669	PMZ_0016800	scaffold_10011	4722	5669	+		chr1	201084263	201084084
II	136.669	PMZ_0016449	scaffold_4543	6936	15014	+		chr1	33647021	33646620
II	136.669	PMZ_0016800	scaffold_10011	4722	5669	+		chr12	108169200	108169379
II	136.669	PMZ_0013591	scaffold_1612	39927	46416	-		chr6	42162558	42152556
II	136.669	PMZ_0016801	scaffold_10011	20934	27973	-		chr7	129756284	129762043
II	137.119	PMZ_0010855	scaffold_578	11523	17793	-		chr11	639430	639930
II	137.119	PMZ_0010858	scaffold_578	56374	61687	+		chr11	61131863	61133688
II	137.119	PMZ_0010860	scaffold_578	70346	75120	+		chr11	61165248	61165448
II	137.119	PMZ_0010856	scaffold_578	27487	35350	-		chr12	16507211	16516972
II	137.119	PMZ_0010857	scaffold_578	38866	54289	-		chr12	16109866	16135372
II	137.119	PMZ_0010859	scaffold_578	61673	69374	-		chr12	16035624	16052986
II	137.119	PMZ_0010862	scaffold_578	97324	115491	+		chr12	15822762	15803862
II	137.914	PMZ_0014813	scaffold_2214	17051	22652	+		chr11	772591	770992
II	137.914	PMZ_0014814	scaffold_2214	27185	38447	-		chr19	55652676	55649329
II	140.063	PMZ_0010492	scaffold_459	23291	24112	-		chr12	5603804	5604148
II	146.666	PMZ_0001658	scaffold_260	366738	370168	+		chr1	161092314	161091961
II	146.666	PMZ_0001654	scaffold_260	235855	241440	-		chr11	33881123	33880905
II	146.666	PMZ_0001655	scaffold_260	271019	274225	-		chr11	33886368	33886147
II	146.666	PMZ_0001656	scaffold_260	293623	304050	-		chr11	20178828	20177988
II	146.666	PMZ_0001657	scaffold_260	296787	300496	+		chr11	20178578	20178793
II	146.666	PMZ_0001652	scaffold_260	32787	88440	+		chr11	21581734	21594955
II	146.666	PMZ_0001660	scaffold_260	420104	429200	+		chr11	34097783	34101254
II	146.666	PMZ_0006652	scaffold_310	223504	246283	+		chr11	22747829	22747987
II	146.666	PMZ_0007638	scaffold_372	180319	182043	+		chr11	13031145	13031975
II	146.666	PMZ_0007639	scaffold_372	240195	242254	-		chr11	45827731	45832844
II	146.666	PMZ_0006572	scaffold_434	158977	176643	+		chr11	12785834	12785983
II	146.666	PMZ_0001652	scaffold_260	32787	88440	+		chr12	44917268	44913770
II	146.666	PMZ_0006650	scaffold_310	178002	181549	+		chr12	100934458	100934583
II	146.666	PMZ_0006651	scaffold_310	203207	205593	+		chr12	100957028	100957264
II	146.666	PMZ_0006653	scaffold_310	259047	268388	+		chr12	101016053	101017459
II	146.666	PMZ_0006654	scaffold_310	277832	286153	+		chr12	44238467	44238733
II	146.666	PMZ_0007638	scaffold_372	180319	182043	+		chr12	86199703	86199077
II	146.666	PMZ_0006572	scaffold_434	158977	176643	+		chr12	3104002	3104160
II	146.666	PMZ_0006571	scaffold_434	81770	101399	+		chr12	86374206	86373070
II	146.666	PMZ_0006652	scaffold_310	223504	246283	+		chr17	34079725	34077225
II	146.666	PMZ_0019959	scaffold_7269	684	13053	-		chr17	6610088	6599068
II	146.666	PMZ_0006649	scaffold_310	47220	88891	+		chr19	49940045	49933899
II	146.666	PMZ_0001662	scaffold_260	444909	457488	-		chr22	43614435	43603537
II	146.666	PMZ_0001667	scaffold_260	697991	709774	-		chr6	35195347	35196524
II	146.666	PMZ_0006573	scaffold_434	197990	235066	+		chr6	35447902	35442824
II	146.666	PMZ_0006647	scaffold_310	13216	19801	+		chr7	55001512	55004463
II	151.36	PMZ_0014774	scaffold_2201	2069	38517	-		chr11	44129545	44135852
II	156.053	PMZ_0011624	scaffold_868	10683	34223	-		chr11	3063472	3038324
II	156.053	PMZ_0011627	scaffold_868	53550	56715	-		chr11	3114284	3113683
II	156.053	PMZ_0011628	scaffold_868	58089	66308	-		chr11	3124519	3114756
II	156.053	PMZ_0011627	scaffold_868	53550	56715	-		chr12	76763616	76762973
II	156.053	PMZ_0011628	scaffold_868	58089	66308	-		chr12	76780409	76765227
II	156.053	PMZ_0011625	scaffold_868	31052	39973	+		chr5	68648082	68647906
II	156.053	PMZ_0011625	scaffold_868	31052	39973	+		chr8	6331557	6331381
II	160.747	PMZ_0002973	scaffold_195	25888	40270	+		chr1	203032956	203044890
II	160.747	PMZ_0002976	scaffold_195	155825	159240	+		chr11	27390691	27389804
II	160.747	PMZ_0002981	scaffold_195	363720	379244	+		chr11	18057671	18042553
II	160.747	PMZ_0002972	scaffold_195	9337	22211	+		chr11	70201800	70208597
II	160.747	PMZ_0002976	scaffold_195	155825	159240	+		chr12	71977426	71978301
II	160.747	PMZ_0002978	scaffold_195	256839	284114	-		chr12	72091053	72091160
II	160.747	PMZ_0002979	scaffold_195	302237	312189	+		chr12	72090101	72094769
II	160.747	PMZ_0002982	scaffold_195	433594	447858	+		chr12	72863537	72863695
II	160.747	PMZ_0002985	scaffold_195	548484	565565	+		chr12	73046100	73046937
II	160.747	PMZ_0002970	scaffold_195	146	881	-		chr15	86312708	86311974
II	160.747	PMZ_0002971	scaffold_195	9213	9542	-		chr15	86313041	86312715
II	160.747	PMZ_0002970	scaffold_195	146	881	-		chr5	73931980	73931243
II	160.747	PMZ_0002971	scaffold_195	9213	9542	-		chr5	73932310	73931984
II	160.747	PMZ_0002974	scaffold_195	115513	134953	+		chr7	28996948	28996643
II	170.482	PMZ_0001413	scaffold_6143	1003122	1003553	-		chr1	205628568	205628380
II	170.482	PMZ_0001409	scaffold_6143	814205	824614	-		chr1	205633700	205632259
II	170.482	PMZ_0001406	scaffold_6143	645766	651547	+		chr10	11531224	11523767
II	170.482	PMZ_0001398	scaffold_6143	393443	394770	+		chr11	9861238	9861029
II	170.482	PMZ_0001402	scaffold_6143	447841	457582	+		chr11	67942649	67934465
II	170.482	PMZ_0001403	scaffold_6143	565587	584184	+		chr11	67842294	67829420
II	170.482	PMZ_0001408	scaffold_6143	677992	706028	+		chr11	9430032	9459387
II	170.482	PMZ_0001411	scaffold_6143	849608	849919	-		chr11	69625462	69625253
II	170.482	PMZ_0001410	scaffold_6143	838559	840318	-		chr12	4554508	4554383
II	170.482	PMZ_0001396	scaffold_6143	112011	144535	-		chr19	55758471	55750778
II	170.482	PMZ_0001407	scaffold_6143	664951	674993	+		chr19	51015843	51015391
II	170.482	PMZ_0001396	scaffold_6143	112011	144535	-		chr22	50832338	50876027
II	170.482	PMZ_0001397	scaffold_6143	368124	381581	+		chr22	50906891	50904600
II	170.482	PMZ_0001400	scaffold_6143	405057	413721	+		chr22	50893841	50885948
II	194.297	PMZ_0013707	scaffold_1685	39393	51317	-		chr19	51207771	51207381
II	194.297	PMZ_0013707	scaffold_1685	39393	51317	-		chr22	51121768	51123075
II	196.556	PMZ_0007686	scaffold_274	2330	12785	-		chr11	35515797	35492153
II	200.634	PMZ_0016166	scaffold_4184	20443	32380	-		chr11	18505614	18502102
II	200.634	PMZ_0004123	scaffold_295	393982	402624	+		chr14	45606343	45618198
II	200.634	PMZ_0004124	scaffold_295	404109	406822	+		chr6	42978655	42979021
II	201.528	PMZ_0016611	scaffold_24780	12912	31057	+		chr11	17491771	17470057
II	201.528	PMZ_0016611	scaffold_24780	12912	31057	+		chr12	22079008	22063091
II	202.422	PMZ_0007502	scaffold_1091	36403	39506	-		chr10	17087158	17085845
III	0	PMZ_0007193	scaffold_633	14008	29212	+		chr2	238253478	238249186
III	0	PMZ_0007193	scaffold_633	14008	29212	+		chr3	130367915	130381079
III	0	PMZ_0007198	scaffold_633	253767	257087	+		chr9	101747846	101748355
III	0	PMZ_0011653	scaffold_1087	84367	85299	-		chrX	77529189	77528323
III	1.725	PMZ_0008628	scaffold_1804	192676	200874	-		chr1	205495142	205497333
III	1.725	PMZ_0008626	scaffold_1804	13083	15232	-		chr10	15688989	15688843
III	1.725	PMZ_0008628	scaffold_1804	192676	200874	-		chr12	96692761	96682944
III	1.725	PMZ_0008626	scaffold_1804	13083	15232	-		chr17	42461026	42460859
III	1.725	PMZ_0007585	scaffold_462	200872	218890	-		chr18	19345732	19378188
III	1.725	PMZ_0007587	scaffold_462	220190	230755	-		chr18	657824	672994
III	1.725	PMZ_0007583	scaffold_462	4859	17121	-		chr7	23018025	23000848
III	1.725	PMZ_0008628	scaffold_1804	192676	200874	-		chrX	47084384	47086103
III	3.45	PMZ_0011674	scaffold_905	38921	42528	-		chr13	41373165	41381598
III	3.45	PMZ_0015890	scaffold_2962	3458	28829	+		chr2	197187341	197184210
III	3.45	PMZ_0019059	scaffold_5948	1	17996	-		chr21	47977499	47987532
III	3.45	PMZ_0016760	scaffold_3644	6406	10963	+		chr4	40788129	40788689
III	3.45	PMZ_0011672	scaffold_905	237	12026	+		chr4	186064527	186068116
III	3.45	PMZ_0011675	scaffold_905	57716	66859	-		chr4	77039347	77036543
III	3.45	PMZ_0011674	scaffold_905	38921	42528	-		chr5	140683420	140682812
III	3.45	PMZ_0016760	scaffold_3644	6406	10963	+		chr7	12727880	12728440
III	3.45	PMZ_0011672	scaffold_905	237	12026	+		chrX	1510902	1505498
III	4.297	PMZ_0012096	scaffold_973	31140	39156	+		chr12	121600226	121603990
III	4.297	PMZ_0012096	scaffold_973	31140	39156	+		chr17	3807331	3806502
III	4.297	PMZ_0012096	scaffold_973	31140	39156	+		chr22	21377230	21377702
III	5.145	PMZ_0020763	scaffold_8717	3168	3788	-		chr17	40275001	40275270
III	17.495	PMZ_0007689	scaffold_3600	182420	239834	-		chr21	47953434	47970659
III	21.481	PMZ_0015488	scaffold_2694	486	28282	+		chr10	71906246	71899683
III	22.017	PMZ_0012457	scaffold_24766	6112	6255	+		chr10	35500183	35500323
III	22.017	PMZ_0012457	scaffold_24766	6112	6255	+		chr12	51213419	51213556
III	22.017	PMZ_0012458	scaffold_24766	38851	44229	+		chr2	208606944	208615852
III	22.641	PMZ_0013729	scaffold_1666	40259	41107	-		chr10	3823950	3823834
III	22.641	PMZ_0013729	scaffold_1666	40259	41107	-		chr2	207988864	207988499
III	24.366	PMZ_0013457	scaffold_1901	1204	42162	-		chr10	3143536	3162236
III	24.366	PMZ_0013457	scaffold_1901	1204	42162	-		chr12	48525036	48535843
III	34.503	PMZ_0006601	scaffold_548	181040	189935	+		chr2	180310519	180309591
III	34.503	PMZ_0006603	scaffold_548	250346	255318	+		chr2	179644180	179641428
III	34.503	PMZ_0006605	scaffold_548	262252	272496	+		chr2	179638835	179637834
III	34.503	PMZ_0006606	scaffold_548	281897	290872	-		chr2	179350367	179360336
III	36.228	PMZ_0006229	scaffold_349	239462	262230	-		chr2	148710091	148695856
III	36.228	PMZ_0018615	scaffold_5533	13	20031	+		chr2	148677797	148684756
III	36.228	PMZ_0018615	scaffold_5533	13	20031	+		chr3	38522825	38524733
III	40.604	PMZ_0002005	scaffold_49	186663	225775	-		chr10	32099676	32096592
III	40.604	PMZ_0002017	scaffold_49	730434	737354	+		chr10	13330545	13323006
III	40.604	PMZ_0002015	scaffold_49	581338	596162	-		chr12	56397423	56398802
III	40.604	PMZ_0002011	scaffold_49	466236	484797	+		chr17	41004303	41008552
III	40.604	PMZ_0002016	scaffold_49	619136	642703	+		chr2	238820162	238820419
III	40.604	PMZ_0002018	scaffold_49	740235	756822	-		chr2	238661949	238666191
III	40.604	PMZ_0002009	scaffold_49	395795	404358	+		chr7	150553652	150558291
III	40.604	PMZ_0002016	scaffold_49	619136	642703	+		chr7	45222760	45222999
III	55.274	PMZ_0010340	scaffold_387	54519	129270	+		chr2	183866937	183790436
III	55.274	PMZ_0010341	scaffold_387	133420	136298	-		chr7	37988440	37989983
III	60.869	PMZ_0010968	scaffold_615	59361	84882	-		chr17	41607021	41605890
III	60.869	PMZ_0010966	scaffold_615	11384	19034	-		chr3	184870572	184870411
III	60.869	PMZ_0010968	scaffold_615	59361	84882	-		chr3	185775007	185766431
III	60.869	PMZ_0010968	scaffold_615	59361	84882	-		chr7	13946204	13935494
III	62.658	PMZ_0011661	scaffold_1489	14162	27275	-		chr17	37599881	37579948
III	62.658	PMZ_0011660	scaffold_1489	9003	11955	-		chr17	37576168	37575980
III	62.658	PMZ_0011662	scaffold_1489	29888	43015	+		chr2	121036241	121047336
III	62.658	PMZ_0011663	scaffold_1489	55379	60653	+		chr2	121103984	121107447
III	62.658	PMZ_0011662	scaffold_1489	29888	43015	+		chr7	39726267	39736470
III	62.658	PMZ_0011663	scaffold_1489	55379	60653	+		chr7	41739912	41729251
III	64.447	PMZ_0001868	scaffold_30	220162	221195	+		chr1	228246687	228247163
III	64.447	PMZ_0001866	scaffold_30	159373	161934	+		chr12	49362112	49361720
III	64.447	PMZ_0001867	scaffold_30	178369	178890	+		chr12	49360336	49359881
III	64.447	PMZ_0001874	scaffold_30	413452	417404	+		chr12	52180365	52201204
III	64.447	PMZ_0001878	scaffold_30	506890	519859	+		chr12	51773469	51748166
III	64.447	PMZ_0001883	scaffold_30	693784	717756	-		chr12	57004300	56994737
III	64.447	PMZ_0011516	scaffold_795	56216	64653	+		chr12	56234667	56230931
III	64.447	PMZ_0001868	scaffold_30	220162	221195	+		chr17	44846165	44845689
III	64.447	PMZ_0001869	scaffold_30	275507	304068	+		chr17	43351583	43348314
III	64.447	PMZ_0001870	scaffold_30	337344	343728	+		chr17	62049566	62045378
III	64.447	PMZ_0001871	scaffold_30	345094	348122	+		chr17	62043902	62043456
III	64.447	PMZ_0001881	scaffold_30	577033	654111	+		chr17	61457068	61497468
III	64.447	PMZ_0001887	scaffold_30	813612	824242	-		chr17	45360687	45376897
III	64.447	PMZ_0001866	scaffold_30	159373	161934	+		chr2	219754693	219755100
III	64.447	PMZ_0001867	scaffold_30	178369	178890	+		chr2	219757499	219757990
III	64.447	PMZ_0001870	scaffold_30	337344	343728	+		chr2	166912991	166908224
III	64.447	PMZ_0001873	scaffold_30	402369	410733	+		chr2	166870433	166870236
III	64.447	PMZ_0001874	scaffold_30	413452	417404	+		chr2	166859224	166847818
III	64.447	PMZ_0001875	scaffold_30	448947	469182	+		chr2	165771784	165755040
III	64.447	PMZ_0001877	scaffold_30	487692	499614	+		chr2	166799902	166731271
III	64.447	PMZ_0001878	scaffold_30	506890	519859	+		chr2	166627033	166606255
III	64.447	PMZ_0001882	scaffold_30	656661	664986	-		chr2	160092705	160092556
III	64.447	PMZ_0001885	scaffold_30	782161	790748	+		chr2	160608944	160609075
III	64.447	PMZ_0018187	scaffold_4929	13158	20273	-		chr2	219204507	219209320
III	64.447	PMZ_0011515	scaffold_795	38069	51677	+		chr2	220409498	220412802
III	64.447	PMZ_0011518	scaffold_795	87239	93163	-		chr2	120833050	120848123
III	64.447	PMZ_0011750	scaffold_902	25426	29875	+		chr2	187365999	187370336
III	64.447	PMZ_0011751	scaffold_902	41271	68865	+		chr2	203379598	203421076
III	64.447	PMZ_0001870	scaffold_30	337344	343728	+		chr3	38663961	38651199
III	64.447	PMZ_0001876	scaffold_30	477953	485429	+		chr3	39107993	39136225
III	64.447	PMZ_0018186	scaffold_4929	6344	14282	+		chr7	150922063	150911158
III	64.447	PMZ_0011515	scaffold_795	38069	51677	+		chr7	78982825	78983714
III	66.172	PMZ_0004779	scaffold_100	78165	168029	-		chr12	50059990	50040670
III	66.172	PMZ_0004777	scaffold_100	31792	32118	+		chr17	45056262	45056020
III	66.172	PMZ_0004777	scaffold_100	31792	32118	+		chr2	154335046	154334759
III	66.172	PMZ_0004780	scaffold_100	191230	224613	-		chr3	123376276	123333033
III	66.172	PMZ_0004783	scaffold_100	274849	275604	+		chr3	124829143	124829033
III	66.172	PMZ_0004778	scaffold_100	58000	74011	-		chr8	81263444	81263650
III	67.897	PMZ_0010577	scaffold_501	45605	80078	-		chr12	56956285	56965640
III	67.897	PMZ_0010575	scaffold_501	21963	31432	-		chr2	163138053	163128724
III	69.592	PMZ_0006171	scaffold_191	180255	196757	-		chr17	40612892	40666479
III	69.592	PMZ_0006169	scaffold_191	139962	153596	-		chr18	33704663	33691019
III	69.592	PMZ_0006168	scaffold_191	115434	123534	+		chr2	196689197	196688979
III	69.592	PMZ_0006169	scaffold_191	139962	153596	-		chr2	196571339	196593076
III	69.592	PMZ_0006164	scaffold_191	25213	57002	+		chr2	116497314	116497505
III	69.592	PMZ_0006166	scaffold_191	82902	91996	+		chr2	118698873	118693068
III	69.592	PMZ_0006171	scaffold_191	180255	196757	-		chr7	138455992	138391372
III	69.592	PMZ_0006164	scaffold_191	25213	57002	+		chr7	154561126	154561281
III	69.592	PMZ_0006165	scaffold_191	59827	74536	+		chr7	154667617	154667811
III	72.142	PMZ_0013400	scaffold_1496	17857	21084	-		chr12	49398802	49396876
III	72.142	PMZ_0013401	scaffold_1496	21830	29159	-		chr2	219694772	219692727
III	72.142	PMZ_0013400	scaffold_1496	17857	21084	-		chr7	151265930	151261128
III	72.142	PMZ_0013398	scaffold_1496	9793	10830	-		chr7	151097328	151092850
III	74.737	PMZ_0008546	scaffold_1337	10595	19990	-		chr1	205760849	205760664
III	74.737	PMZ_0008556	scaffold_1337	199321	199647	+		chr10	88123857	88123666
III	74.737	PMZ_0008552	scaffold_1337	99899	103785	-		chr10	8556473	8555885
III	74.737	PMZ_0008550	scaffold_1337	73190	82691	-		chr11	26663495	26681988
III	74.737	PMZ_0008546	scaffold_1337	10595	19990	-		chr12	105199115	105198960
III	74.737	PMZ_0008554	scaffold_1337	133520	146762	-		chr12	101477456	101490423
III	74.737	PMZ_0008550	scaffold_1337	73190	82691	-		chr12	101504193	101520845
III	74.737	PMZ_0008551	scaffold_1337	86445	92284	+		chr12	50264436	50264299
III	74.737	PMZ_0008552	scaffold_1337	99899	103785	-		chr12	53218167	53216799
III	74.737	PMZ_0010112	scaffold_493	41801	92051	+		chr12	52369015	52387891
III	74.737	PMZ_0008551	scaffold_1337	86445	92284	+		chr2	219140356	219140204
III	74.737	PMZ_0010111	scaffold_493	18397	37298	+		chr2	158637083	158617390
III	74.737	PMZ_0008552	scaffold_1337	99899	103785	-		chr3	137821131	137820563
III	74.737	PMZ_0008556	scaffold_1337	199321	199647	+		chr4	93511281	93511439
III	74.737	PMZ_0008551	scaffold_1337	86445	92284	+		chr8	145066842	145066994
III	74.737	PMZ_0008553	scaffold_1337	114084	129091	+		chr9	103111645	103108363
III	74.737	PMZ_0008552	scaffold_1337	99899	103785	-		chr9	102068066	102068653
III	74.737	PMZ_0010114	scaffold_493	134142	155625	-		chr9	111745598	111727659
III	74.737	PMZ_0010111	scaffold_493	18397	37298	+		chr9	101900200	101911581
III	74.737	PMZ_0010112	scaffold_493	41801	92051	+		chr9	101891133	101911584
III	78.315	PMZ_0016684	scaffold_3506	24422	29473	-		chr17	40689501	40696226
III	78.315	PMZ_0016685	scaffold_3506	26172	26399	+		chr17	40695269	40695045
III	80.039	PMZ_0002566	scaffold_622	296067	325898	+		chr10	127789816	127782517
III	80.039	PMZ_0002569	scaffold_622	403755	415088	-		chr10	135193553	135204926
III	80.039	PMZ_0002570	scaffold_622	441908	455168	+		chr12	50480536	50492601
III	80.039	PMZ_0002579	scaffold_622	678979	694346	-		chr12	58150763	58152515
III	80.039	PMZ_0002565	scaffold_622	157601	157904	+		chr17	59147370	59147510
III	80.039	PMZ_0002575	scaffold_622	591069	592328	+		chr17	40738917	40738783
III	80.039	PMZ_0002565	scaffold_622	157601	157904	+		chr19	15722602	15722742
III	80.039	PMZ_0002565	scaffold_622	157601	157904	+		chr2	64574735	64574595
III	80.039	PMZ_0002571	scaffold_622	455354	469577	-		chr2	220092746	220088310
III	80.039	PMZ_0002576	scaffold_622	592642	599942	-		chr2	216931212	216930033
III	80.039	PMZ_0002577	scaffold_622	603756	609674	+		chr2	216964624	216965196
III	80.039	PMZ_0002579	scaffold_622	678979	694346	-		chr2	217148401	217124038
III	80.039	PMZ_0002566	scaffold_622	296067	325898	+		chr20	3654585	3653395
III	80.039	PMZ_0002565	scaffold_622	157601	157904	+		chr3	161147247	161147107
III	80.039	PMZ_0002567	scaffold_622	335970	347364	+		chr5	156924103	156919990
III	80.039	PMZ_0002573	scaffold_622	532306	584255	+		chr5	16711354	16673788
III	80.039	PMZ_0002578	scaffold_622	615177	621915	-		chr5	15928442	15937289
III	80.039	PMZ_0002572	scaffold_622	474247	484930	+		chr7	150732578	150742367
III	94.3	PMZ_0002356	scaffold_306	253271	254710	+		chr1	228464153	228464413
III	94.3	PMZ_0002357	scaffold_306	255531	260381	+		chr1	228465187	228465564
III	94.3	PMZ_0002348	scaffold_306	25727	37302	-		chr1	111922943	111923173
III	94.3	PMZ_0002367	scaffold_306	549099	551795	+		chr1	179556173	179556418
III	94.3	PMZ_0002348	scaffold_306	25727	37302	-		chr11	64913416	64913183
III	94.3	PMZ_0002348	scaffold_306	25727	37302	-		chr12	53535867	53536097
III	94.3	PMZ_0002350	scaffold_306	61113	69882	+		chr12	51399210	51388324
III	94.3	PMZ_0002371	scaffold_306	667372	689020	+		chr12	57146079	57133071
III	94.3	PMZ_0002355	scaffold_306	240938	244487	+		chr17	42746748	42751480
III	94.3	PMZ_0002363	scaffold_306	374821	376526	+		chr17	42294073	42293022
III	94.3	PMZ_0002364	scaffold_306	376932	392371	+		chr17	42290309	42286702
III	94.3	PMZ_0002365	scaffold_306	394937	397000	+		chr17	42275101	42274967
III	94.3	PMZ_0002360	scaffold_306	326788	338292	+		chr2	219494153	219501276
III	94.3	PMZ_0002362	scaffold_306	343681	360182	+		chr2	219507740	219503359
III	94.3	PMZ_0002349	scaffold_306	44842	49545	+		chr2	220465956	220466805
III	94.3	PMZ_0002367	scaffold_306	549099	551795	+		chr2	236658997	236659134
III	94.3	PMZ_0002372	scaffold_306	702246	703397	+		chr2	237489169	237490053
III	94.3	PMZ_0002354	scaffold_306	220092	226162	+		chr3	196188246	196188695
III	94.3	PMZ_0002360	scaffold_306	326788	338292	+		chr3	17051634	17053481
III	94.3	PMZ_0002354	scaffold_306	220092	226162	+		chr4	1547978	1547547
III	94.3	PMZ_0002348	scaffold_306	25727	37302	-		chr4	110594996	110595259
III	94.3	PMZ_0002368	scaffold_306	563596	577915	+		chr7	150825664	150831570
III	94.3	PMZ_0002369	scaffold_306	620010	626689	+		chr7	150838984	150839701
III	94.3	PMZ_0002348	scaffold_306	25727	37302	-		chr8	76214522	76214791
III	99.445	PMZ_0006547	scaffold_378	6121	12026	+		chr12	57624580	57628141
III	99.445	PMZ_0006551	scaffold_378	184736	192945	-		chr17	47394355	47376123
III	99.445	PMZ_0006553	scaffold_378	279364	287657	-		chr2	138373772	138376089
III	99.445	PMZ_0006548	scaffold_378	18193	58406	+		chr7	11053373	11082442
III	99.445	PMZ_0006552	scaffold_378	246009	266121	-		chr7	11446671	11441417
III	101.17	PMZ_0015042	scaffold_2361	30954	36927	+		chr10	17271716	17277380
III	101.17	PMZ_0015042	scaffold_2361	30954	36927	+		chr11	4745147	4744222
III	101.17	PMZ_0012111	scaffold_1303	59340	65842	-		chr7	11582745	11581059
III	104.619	PMZ_0006731	scaffold_299	195457	209476	-		chr1	120263787	120283152
III	104.619	PMZ_0018441	scaffold_5220	3256	9227	+		chr10	135194962	135197696
III	104.619	PMZ_0006737	scaffold_299	268018	286332	+		chr12	58088026	58109743
III	104.619	PMZ_0006729	scaffold_299	54202	67715	-		chr12	53412581	53412799
III	104.619	PMZ_0006736	scaffold_299	252709	265450	+		chr2	170403216	170393732
III	104.619	PMZ_0014897	scaffold_4040	6617	33773	+		chr2	179414953	179402223
III	104.619	PMZ_0018442	scaffold_5220	16348	20121	+		chr2	170681107	170676068
III	104.619	PMZ_0018441	scaffold_5220	3256	9227	+		chr20	4162733	4163503
III	104.619	PMZ_0006730	scaffold_299	70993	76739	+		chr3	46023175	46014558
III	104.619	PMZ_0014896	scaffold_4040	1853	5235	+		chr3	42728011	42730547
III	104.619	PMZ_0006735	scaffold_299	230517	258146	-		chr5	154871196	154871423
III	104.619	PMZ_0006736	scaffold_299	252709	265450	+		chr5	93929655	93930490
III	104.619	PMZ_0006729	scaffold_299	54202	67715	-		chr7	104308196	104308552
III	104.619	PMZ_0006729	scaffold_299	54202	67715	-		chr9	98908328	98908645
III	104.619	PMZ_0006729	scaffold_299	54202	67715	-		chrX	110864586	110864362
III	106.344	PMZ_0011081	scaffold_643	101693	106177	-		chr2	152132190	152132005
III	106.344	PMZ_0011079	scaffold_643	36031	46400	-		chr2	151343862	151326504
III	106.994	PMZ_0019432	scaffold_6448	1698	9182	+		chr2	219266855	219269136
III	109.766	PMZ_0007811	scaffold_588	173436	192818	+		chr1	150941566	150938949
III	109.766	PMZ_0007812	scaffold_588	191723	198482	-		chr1	89570441	89570076
III	109.766	PMZ_0007807	scaffold_588	14545	16296	-		chr12	58001136	58002512
III	109.766	PMZ_0007811	scaffold_588	173436	192818	+		chr12	50536993	50528326
III	109.766	PMZ_0007812	scaffold_588	191723	198482	-		chr12	57066842	57064059
III	109.766	PMZ_0007807	scaffold_588	14545	16296	-		chr3	122288119	122289517
III	109.766	PMZ_0007808	scaffold_588	17945	32399	+		chr3	122354663	122354944
III	109.766	PMZ_0007810	scaffold_588	87602	89257	+		chr3	122353921	122354941
III	109.766	PMZ_0007812	scaffold_588	191723	198482	-		chr4	170712844	170712479
III	109.766	PMZ_0007816	scaffold_588	220270	235214	-		chr7	12400889	12393980
III	110.101	PMZ_0018656	scaffold_5444	2054	8366	-		chr1	228333214	228335245
III	120.551	PMZ_0003365	scaffold_22	127309	155481	-		chr12	52774370	52756638
III	120.551	PMZ_0003374	scaffold_22	368771	426237	+		chr12	48369301	48367193
III	120.551	PMZ_0003381	scaffold_22	546081	549977	+		chr12	56112867	56113387
III	120.551	PMZ_0003364	scaffold_22	8967	22258	+		chr12	56420744	56421736
III	120.551	PMZ_0003368	scaffold_22	218971	228752	+		chr17	38798811	38788444
III	120.551	PMZ_0003374	scaffold_22	368771	426237	+		chr17	48277297	48262866
III	120.551	PMZ_0003377	scaffold_22	450065	482297	+		chr17	48226588	48220899
III	120.551	PMZ_0003364	scaffold_22	8967	22258	+		chr17	37949022	37947670
III	120.551	PMZ_0003366	scaffold_22	159941	177980	-		chr2	219093424	219114645
III	120.551	PMZ_0003370	scaffold_22	245156	249528	-		chr2	172644169	172641835
III	120.551	PMZ_0003373	scaffold_22	288637	319952	+		chr2	189405902	189406042
III	120.551	PMZ_0003379	scaffold_22	486278	508874	-		chr2	173330268	173354383
III	120.551	PMZ_0003383	scaffold_22	577524	580231	+		chr2	173659772	173659912
III	120.551	PMZ_0003367	scaffold_22	180959	219580	-		chr3	133377967	133327343
III	120.551	PMZ_0003370	scaffold_22	245156	249528	-		chr7	95751055	95750521
III	120.551	PMZ_0003371	scaffold_22	263068	271718	-		chr7	95838290	95813587
III	120.551	PMZ_0003376	scaffold_22	430760	446610	+		chr7	94164620	94184998
III	120.551	PMZ_0003364	scaffold_22	8967	22258	+		chr7	50444245	50450404
III	124.09	PMZ_0002305	scaffold_430	13722	20043	-		chr1	150876372	150876686
III	124.09	PMZ_0002303	scaffold_430	3731	6739	+		chr2	198646517	198641783
III	124.09	PMZ_0002312	scaffold_430	382959	405805	-		chr2	177188108	177194160
III	124.09	PMZ_0002315	scaffold_430	607574	607958	-		chr2	176988706	176988855
III	124.09	PMZ_0002305	scaffold_430	13722	20043	-		chr7	25163738	25163323
III	124.09	PMZ_0002315	scaffold_430	607574	607958	-		chr7	27203416	27203225
III	124.09	PMZ_0002305	scaffold_430	13722	20043	-		chr8	33827396	33827082
III	136.726	PMZ_0002097	scaffold_3	562765	567891	+		chr17	61600748	61601729
III	136.726	PMZ_0002099	scaffold_3	722790	744662	+		chr17	61611247	61619801
III	136.726	PMZ_0002092	scaffold_3	6452	51061	-		chr18	33779743	33800188
III	136.726	PMZ_0002093	scaffold_3	144292	158776	+		chr2	70315095	70315973
III	136.726	PMZ_0002096	scaffold_3	459551	460396	-		chr2	164466916	164466065
III	136.726	PMZ_0002097	scaffold_3	562765	567891	+		chr2	163695091	163693048
III	136.726	PMZ_0002098	scaffold_3	707635	709288	+		chr2	163361108	163360950
III	136.726	PMZ_0002100	scaffold_3	749067	757289	-		chr2	203765837	203745586
III	136.726	PMZ_0002101	scaffold_3	765155	768839	+		chr20	34572486	34575455
III	136.726	PMZ_0002094	scaffold_3	227783	240027	+		chr7	51261288	51258548
III	136.726	PMZ_0002095	scaffold_3	385480	399347	+		chr7	50694672	50660652
III	136.726	PMZ_0002096	scaffold_3	459551	460396	-		chr7	50513815	50512964
III	136.726	PMZ_0002097	scaffold_3	562765	567891	+		chr7	150675001	150671800
III	136.726	PMZ_0002098	scaffold_3	707635	709288	+		chr7	150654534	150654319
III	136.726	PMZ_0002099	scaffold_3	722790	744662	+		chr7	150649947	150645938
III	136.726	PMZ_0002093	scaffold_3	144292	158776	+		chr8	75516260	75515556
III	136.726	PMZ_0002094	scaffold_3	227783	240027	+		chrX	118072311	118072856
III	161.358	PMZ_0004582	scaffold_24925	390278	435985	+		chr12	48185794	48179508
III	161.358	PMZ_0004579	scaffold_24925	192192	208272	+		chr2	240960830	240960612
III	161.358	PMZ_0004582	scaffold_24925	390278	435985	+		chr2	240033372	239975164
III	161.358	PMZ_0004583	scaffold_24925	455360	457760	-		chr2	239756899	239757336
III	161.358	PMZ_0004584	scaffold_24925	457414	457767	+		chr2	239757197	239756859
III	161.358	PMZ_0004575	scaffold_24925	36522	39848	+		chr5	353855	354025
III	161.358	PMZ_0004577	scaffold_24925	122602	132161	+		chr7	17373467	17378913
III	161.358	PMZ_0004575	scaffold_24925	36522	39848	+		chr7	17349564	17349743
III	161.358	PMZ_0004583	scaffold_24925	455360	457760	-		chr7	19156638	19156339
III	166.377	PMZ_0013556	scaffold_1554	684	26528	-		chr17	40332963	40330404
III	173.815	PMZ_0012861	scaffold_1262	32528	54331	-		chr12	53448088	53449627
III	173.815	PMZ_0003615	scaffold_616	101238	124150	+		chr12	50498400	50503299
III	173.815	PMZ_0003619	scaffold_616	167752	183689	+		chr12	57691979	57690193
III	173.815	PMZ_0003621	scaffold_616	381721	404015	+		chr3	36526457	36527696
III	173.815	PMZ_0003614	scaffold_616	85953	100583	-		chr3	31725609	31710133
III	173.815	PMZ_0003622	scaffold_616	432720	445575	-		chr7	47336824	47323294
III	173.815	PMZ_0003613	scaffold_616	44929	49563	-		chr7	7571527	7570991
III	178.224	PMZ_0003390	scaffold_246	470095	474869	-		chr1	179317979	179319565
III	178.224	PMZ_0003387	scaffold_246	54926	60049	-		chr12	53459750	53459619
III	178.224	PMZ_0003388	scaffold_246	222730	235212	+		chr2	217559426	217541495
III	178.224	PMZ_0003389	scaffold_246	438926	465189	+		chr2	136567564	136566011
III	178.224	PMZ_0003384	scaffold_246	1428	7377	-		chr6	109827999	109815176
III	178.224	PMZ_0003385	scaffold_246	9066	30225	-		chr6	109871487	109867229
III	178.224	PMZ_0003388	scaffold_246	222730	235212	+		chr7	45960634	45954473
III	182.178	PMZ_0020534	scaffold_8287	309	12139	+		chr10	24721923	24722120
III	184.161	PMZ_0002797	scaffold_147	411226	416834	-		chr12	49075415	49062904
III	184.161	PMZ_0002802	scaffold_147	659797	666527	-		chr12	51447561	51449807
III	184.161	PMZ_0002795	scaffold_147	309778	339721	+		chr17	74902100	74944917
III	184.161	PMZ_0004410	scaffold_415	229533	261200	+		chr17	45656755	45699274
III	184.161	PMZ_0004411	scaffold_415	265440	290441	+		chr17	45730063	45747235
III	184.161	PMZ_0002793	scaffold_147	188081	188389	+		chr2	135011990	135012220
III	184.161	PMZ_0002796	scaffold_147	351073	369861	-		chr2	135215745	135215602
III	184.161	PMZ_0002798	scaffold_147	418163	431250	+		chr2	135676452	135705471
III	184.161	PMZ_0019787	scaffold_7008	3084	10144	+		chr2	135616828	135625283
III	184.161	PMZ_0013235	scaffold_2340	48374	53052	-		chr3	101240789	101241247
III	184.161	PMZ_0013233	scaffold_2340	18347	27468	-		chr5	14419887	14420141
III	184.161	PMZ_0020097	scaffold_7502	990	14476	+		chr5	14472702	14485357
III	184.161	PMZ_0002799	scaffold_147	438093	483940	+		chr7	158476081	158448943
III	184.161	PMZ_0004413	scaffold_415	376860	407553	-		chr9	138993321	138993677
IV	9.659	PMZ_0001800	scaffold_288	832811	845026	-		chr1	168025579	168025142
IV	9.659	PMZ_0001786	scaffold_288	10723	30091	-		chr10	46159167	46143801
IV	9.659	PMZ_0001797	scaffold_288	797918	798874	-		chr11	105795224	105797632
IV	9.659	PMZ_0001789	scaffold_288	214807	224693	-		chr13	107145540	107145391
IV	9.659	PMZ_0001796	scaffold_288	785152	792022	-		chr14	24108377	24114444
IV	9.659	PMZ_0001799	scaffold_288	817281	829529	-		chr16	71950367	71955356
IV	9.659	PMZ_0001800	scaffold_288	832811	845026	-		chr16	81124283	81116474
IV	9.659	PMZ_0001801	scaffold_288	847916	862927	-		chr16	72048372	72057530
IV	9.659	PMZ_0008109	scaffold_586	155016	203148	-		chr16	57144712	57181558
IV	9.659	PMZ_0001799	scaffold_288	817281	829529	-		chr19	38282492	38283031
IV	9.659	PMZ_0001790	scaffold_288	390105	405553	-		chr20	30671693	30674648
IV	9.659	PMZ_0001798	scaffold_288	803095	813846	-		chr20	32883395	32873246
IV	9.659	PMZ_0001793	scaffold_288	588272	589259	+		chr3	150917026	150916301
IV	9.659	PMZ_0001797	scaffold_288	797918	798874	-		chr4	158257628	158262581
IV	9.659	PMZ_0001791	scaffold_288	500792	503511	+		chr5	60053482	60053330
IV	9.659	PMZ_0001792	scaffold_288	520789	537811	-		chr5	60200697	60183261
IV	9.659	PMZ_0008108	scaffold_586	26073	43484	+		chr5	13916630	13891082
IV	9.659	PMZ_0001790	scaffold_288	390105	405553	-		chr6	116288840	116277610
IV	9.659	PMZ_0001791	scaffold_288	500792	503511	+		chr6	80629247	80629131
IV	9.659	PMZ_0001794	scaffold_288	596678	620379	+		chr6	4133923	4116111
IV	9.659	PMZ_0001793	scaffold_288	588272	589259	+		chr7	37780131	37780844
IV	9.659	PMZ_0001789	scaffold_288	214807	224693	-		chrX	68060345	68060494
IV	9.659	PMZ_0001797	scaffold_288	797918	798874	-		chrX	122551352	122561999
IV	30.045	PMZ_0014364	scaffold_2045	19945	25629	-		chr20	34313079	34292406
IV	30.045	PMZ_0014363	scaffold_2045	6343	12707	+		chr8	94935008	94935868
IV	30.045	PMZ_0014362	scaffold_2045	976	4289	+		chr8	94934429	94935010
IV	33.491	PMZ_0005052	scaffold_1118	351231	360555	+		chr11	11374666	11373653
IV	33.491	PMZ_0005058	scaffold_1118	409480	411247	-		chr14	24706301	24706566
IV	33.491	PMZ_0005051	scaffold_1118	333212	342762	+		chr16	56485114	56468239
IV	33.491	PMZ_0005054	scaffold_1118	366006	375378	+		chr16	58163019	58162933
IV	33.491	PMZ_0005053	scaffold_1118	365531	374792	-		chr18	58039438	58038632
IV	33.491	PMZ_0005049	scaffold_1118	179177	194123	+		chr20	34218956	34214495
IV	33.491	PMZ_0005052	scaffold_1118	351231	360555	+		chr20	489195	468072
IV	33.491	PMZ_0005053	scaffold_1118	365531	374792	-		chr20	54823978	54824850
IV	33.491	PMZ_0005048	scaffold_1118	164559	180112	-		chr5	13737514	13692096
IV	35.216	PMZ_0012303	scaffold_1075	27242	35010	+		chr1	9996686	9992864
IV	35.216	PMZ_0015538	scaffold_2692	19092	38612	+		chr11	72013032	72005063
IV	35.216	PMZ_0010599	scaffold_532	66635	86013	+		chr14	20940465	20944736
IV	35.216	PMZ_0012302	scaffold_1075	20254	26525	-		chr16	29466100	29469078
IV	35.216	PMZ_0012300	scaffold_1075	218	19944	+		chr16	14932261	14983069
IV	35.216	PMZ_0010598	scaffold_532	32856	41801	-		chr16	71319760	71317595
IV	35.216	PMZ_0010601	scaffold_532	92950	103596	-		chr16	58296292	58312544
IV	35.216	PMZ_0018476	scaffold_5636	650	6568	+		chr16	87872396	87868021
IV	35.216	PMZ_0010597	scaffold_532	21849	31936	+		chr2	31758820	31751269
IV	35.216	PMZ_0010596	scaffold_532	6056	23151	-		chr20	44987076	44979410
IV	35.216	PMZ_0012304	scaffold_1075	37388	76644	-		chr3	142151705	142075727
IV	36.94	PMZ_0017585	scaffold_10134	17245	25577	+		chr16	58051236	58054146
IV	38.665	PMZ_0018692	scaffold_6413	8767	20264	+		chr3	122134267	122133455
IV	40.39	PMZ_0005107	scaffold_102	59798	62904	-		chr16	88503158	88504246
IV	69.874	PMZ_0010519	scaffold_612	111161	127761	+		chr16	77398186	77393214
IV	69.874	PMZ_0010517	scaffold_612	9894	20009	-		chr19	9130511	9130657
IV	69.874	PMZ_0016555	scaffold_3401	18940	29673	-		chr5	5318241	5319245
IV	69.874	PMZ_0010517	scaffold_612	9894	20009	-		chr5	125999169	125999026
IV	69.874	PMZ_0016554	scaffold_3401	7084	9924	+		chr8	106813709	106815763
IV	73.359	PMZ_0011118	scaffold_654	7528	9551	+		chr14	23058063	23044006
IV	73.359	PMZ_0011121	scaffold_654	57182	75521	-		chr15	73007649	73029306
IV	73.359	PMZ_0011117	scaffold_654	345	5364	-		chr16	68349880	68371474
IV	73.359	PMZ_0011119	scaffold_654	15270	38301	+		chr2	131936393	131935824
IV	73.359	PMZ_0011122	scaffold_654	85611	99929	+		chr8	145321742	145322083
IV	73.359	PMZ_0011119	scaffold_654	15270	38301	+		chr9	94487206	94486601
IV	73.359	PMZ_0011120	scaffold_654	42873	54382	+		chr9	107513243	107517001
IV	76.893	PMZ_0010818	scaffold_2224	4568	11924	-		chr16	56362540	56370775
IV	76.893	PMZ_0010819	scaffold_2224	58671	64656	-		chr16	56309844	56309987
IV	76.893	PMZ_0004807	scaffold_603	23988	25148	+		chr16	56385302	56388941
IV	76.893	PMZ_0004815	scaffold_603	292596	311609	-		chr16	74957901	74943708
IV	76.893	PMZ_0004816	scaffold_603	407922	424159	-		chr16	57562825	57562538
IV	76.893	PMZ_0004806	scaffold_603	4769	12480	+		chr16	56374740	56377859
IV	76.893	PMZ_0004808	scaffold_603	53332	89431	-		chr16	57775664	57790855
IV	76.893	PMZ_0007881	scaffold_1535	170799	189146	+		chr18	66377381	66377259
IV	76.893	PMZ_0004816	scaffold_603	407922	424159	-		chr18	66504244	66504423
IV	76.893	PMZ_0004809	scaffold_603	200835	213292	+		chr21	15753811	15745953
IV	76.893	PMZ_0004810	scaffold_603	213768	230108	-		chr7	36461469	36492185
IV	76.893	PMZ_0004814	scaffold_603	280396	288201	+		chr8	145750295	145748306
IV	88.192	PMZ_0016108	scaffold_3071	465	9877	-		chr8	145724290	145725998
IV	88.217	PMZ_0008054	scaffold_384	139695	167243	+		chr16	47621564	47630444
IV	88.217	PMZ_0008053	scaffold_384	91352	113704	+		chr16	47533663	47537013
IV	90.006	PMZ_0004668	scaffold_322	20671	27226	-		chr14	93604448	93604702
IV	90.006	PMZ_0004668	scaffold_322	20671	27226	-		chr15	47119794	47120021
IV	90.006	PMZ_0004675	scaffold_322	181456	196977	-		chr16	89357580	89354933
IV	90.006	PMZ_0004668	scaffold_322	20671	27226	-		chr16	69480996	69481181
IV	90.006	PMZ_0004676	scaffold_322	219771	233259	+		chr16	89590527	89620461
IV	90.006	PMZ_0004677	scaffold_322	235690	238311	+		chr16	89597079	89597222
IV	90.006	PMZ_0004671	scaffold_322	62025	68797	+		chr16	68012508	68009990
IV	90.006	PMZ_0004673	scaffold_322	78340	83809	-		chr16	84879383	84888470
IV	90.006	PMZ_0004675	scaffold_322	181456	196977	-		chr18	9208633	9216901
IV	90.006	PMZ_0004668	scaffold_322	20671	27226	-		chr18	71930760	71930584
IV	90.006	PMZ_0004679	scaffold_322	425281	426516	+		chr20	60791994	60791089
IV	90.006	PMZ_0004678	scaffold_322	240485	276969	+		chr5	78296913	78296042
IV	90.006	PMZ_0004673	scaffold_322	78340	83809	-		chr8	75756210	75761479
IV	91.795	PMZ_0007446	scaffold_1386	208224	230257	-		chr1	110116516	110134852
IV	91.795	PMZ_0007445	scaffold_1386	168725	181877	-		chr11	113264219	113265803
IV	91.795	PMZ_0007445	scaffold_1386	168725	181877	-		chr14	24808778	24807627
IV	91.795	PMZ_0015798	scaffold_18969	5452	10285	+		chr16	47699845	47703329
IV	91.795	PMZ_0007446	scaffold_1386	208224	230257	-		chr3	50289824	50295119
IV	100.547	PMZ_0012241	scaffold_1812	64539	73352	-		chr16	51175604	51172596
IV	100.547	PMZ_0001705	scaffold_25060	3835	20495	+		chr16	68104919	68112772
IV	100.547	PMZ_0004367	scaffold_454	184216	204216	+		chr16	699991	711862
IV	100.547	PMZ_0004371	scaffold_454	319344	326064	+		chr16	676004	677619
IV	100.547	PMZ_0015644	scaffold_5529	21434	37986	-		chr16	67266052	67264205
IV	100.547	PMZ_0004362	scaffold_454	119557	139493	+		chr17	80882862	80887376
IV	100.547	PMZ_0004364	scaffold_454	173094	173915	-		chr17	54671741	54672280
IV	100.547	PMZ_0004371	scaffold_454	319344	326064	+		chr17	80616484	80615742
IV	100.547	PMZ_0012241	scaffold_1812	64539	73352	-		chr18	76753102	76755465
IV	100.547	PMZ_0001708	scaffold_25060	447611	493699	+		chr18	74580638	74587614
IV	100.547	PMZ_0015644	scaffold_5529	21434	37986	-		chr18	34320616	34335277
IV	100.547	PMZ_0004376	scaffold_454	468777	472135	-		chr19	36142143	36142265
IV	100.547	PMZ_0004374	scaffold_454	347460	353082	-		chr7	1538997	1533493
IV	100.547	PMZ_0004375	scaffold_454	377128	390745	+		chrX	154115106	154115759
IV	104.122	PMZ_0006759	scaffold_361	23548	34486	+		chr1	95709820	95712220
IV	104.122	PMZ_0011251	scaffold_710	51334	55311	-		chr1	11087706	11086963
IV	104.122	PMZ_0011251	scaffold_710	51334	55311	-		chr12	7174937	7177931
IV	104.122	PMZ_0011249	scaffold_710	10732	33535	-		chr14	23310697	23312629
IV	104.122	PMZ_0006893	scaffold_293	118013	130468	-		chr16	69752456	69744888
IV	104.122	PMZ_0006894	scaffold_293	273276	274692	+		chr16	86600942	86601427
IV	104.122	PMZ_0006889	scaffold_293	49436	59157	+		chr16	58549740	58552939
IV	104.122	PMZ_0006892	scaffold_293	80910	113212	-		chr16	58583868	58554865
IV	104.122	PMZ_0006763	scaffold_361	103817	122385	-		chr16	56852579	56878518
IV	104.122	PMZ_0011249	scaffold_710	10732	33535	-		chr16	58071373	58074604
IV	104.122	PMZ_0011250	scaffold_710	34684	50528	-		chr16	70582189	70605713
IV	104.122	PMZ_0011252	scaffold_710	82393	99356	-		chr16	70713779	70708230
IV	104.122	PMZ_0006757	scaffold_361	5695	10502	-		chr19	53793792	53792920
IV	104.122	PMZ_0006756	scaffold_361	402	1724	+		chr20	33867924	33867368
IV	104.122	PMZ_0011251	scaffold_710	51334	55311	-		chr3	186954317	186953514
IV	104.122	PMZ_0006893	scaffold_293	118013	130468	-		chr6	3010258	3019856
IV	104.122	PMZ_0006760	scaffold_361	37199	52900	+		chr6	25689401	25691358
IV	104.122	PMZ_0006762	scaffold_361	98891	102216	+		chr6	25701432	25701554
IV	104.122	PMZ_0006890	scaffold_293	55742	67981	-		chr8	135613837	135600490
IV	105.255	PMZ_0023148	scaffold_16013	44	2594	+		chr20	48713358	48713206
IV	105.255	PMZ_0023148	scaffold_16013	44	2594	+		chr3	175436450	175436244
IV	105.255	PMZ_0023148	scaffold_16013	44	2594	+		chr8	48955592	48955762
IV	106.388	PMZ_0010511	scaffold_505	40007	68538	+		chr18	29225440	29205580
IV	106.388	PMZ_0010509	scaffold_505	1758	9985	+		chr19	34887212	34890926
IV	106.388	PMZ_0010510	scaffold_505	18930	39831	-		chr20	48466113	48504503
IV	106.388	PMZ_0010511	scaffold_505	40007	68538	+		chr20	48260191	48252852
IV	118.049	PMZ_0006224	scaffold_262	194513	197738	-		chr16	67271312	67271139
IV	118.049	PMZ_0006225	scaffold_262	198864	204467	-		chr16	67272348	67271934
IV	118.049	PMZ_0006218	scaffold_262	377	48180	+		chr16	46717503	46694387
IV	118.049	PMZ_0006222	scaffold_262	156865	177626	+		chr18	59888623	59949661
IV	118.049	PMZ_0006226	scaffold_262	275623	283646	-		chr18	33877799	33877999
IV	118.049	PMZ_0006220	scaffold_262	58315	67474	-		chr18	59828577	59813185
IV	118.049	PMZ_0006227	scaffold_262	299225	308863	-		chr19	30020723	30020950
IV	118.049	PMZ_0006223	scaffold_262	179997	187029	+		chr3	33135624	33134341
IV	118.049	PMZ_0006227	scaffold_262	299225	308863	-		chr7	54617518	54617814
IV	138.898	PMZ_0010801	scaffold_1045	88867	108949	+		chr1	158047780	158054357
IV	138.898	PMZ_0010799	scaffold_1045	21436	22499	+		chr14	24546111	24546626
IV	138.898	PMZ_0010800	scaffold_1045	33109	42458	-		chr16	57159766	57181567
IV	138.898	PMZ_0010799	scaffold_1045	21436	22499	+		chr20	34215312	34214483
IV	138.898	PMZ_0010800	scaffold_1045	33109	42458	-		chr20	34218956	34214217
IV	138.898	PMZ_0010798	scaffold_1045	8072	14914	+		chr20	34220612	34219607
IV	138.898	PMZ_0010799	scaffold_1045	21436	22499	+		chr8	87567102	87568614
IV	138.898	PMZ_0010798	scaffold_1045	8072	14914	+		chr8	87541173	87552565
IV	161.216	PMZ_0009591	scaffold_2430	163794	173869	+		chr1	157805946	157802980
IV	168.39	PMZ_0021914	scaffold_12046	1086	8185	-		chr14	94936102	94935551
IV	168.39	PMZ_0021914	scaffold_12046	1086	8185	-		chr17	1650611	1650805
IX	0	PMZ_0016143	scaffold_3230	1041	9601	+		chr6	30865184	30866817
IX	15.508	PMZ_0008891	scaffold_1670	167734	172417	-		chr1	33772906	33772391
IX	15.508	PMZ_0014577	scaffold_2126	3741	15772	-		chr1	91180236	91178094
IX	15.508	PMZ_0001148	scaffold_53	1842	17057	-		chr10	52467906	52465143
IX	15.508	PMZ_0001157	scaffold_53	816520	836767	-		chr2	10581819	10581649
IX	15.508	PMZ_0001158	scaffold_53	847221	849689	-		chr2	10584776	10584277
IX	15.508	PMZ_0008892	scaffold_1670	188351	192886	-		chr6	75875496	75875227
IX	15.508	PMZ_0008891	scaffold_1670	167734	172417	-		chr9	124209724	124209190
IX	15.508	PMZ_0014577	scaffold_2126	3741	15772	-		chr9	135462790	135464702
IX	15.508	PMZ_0001148	scaffold_53	1842	17057	-		chr9	90459766	90462233
IX	21.265	PMZ_0000341	scaffold_357	1642162	1651981	-		chr1	46775809	46776027
IX	21.265	PMZ_0000317	scaffold_357	1075512	1082427	+		chr11	7063732	7065102
IX	21.265	PMZ_0000325	scaffold_357	1258896	1275689	-		chr19	55451535	55450381
IX	21.265	PMZ_0000348	scaffold_357	1987030	1996236	+		chr2	96799279	96795591
IX	21.265	PMZ_0000352	scaffold_357	2045888	2067226	+		chr2	97024790	97035238
IX	21.265	PMZ_0000346	scaffold_357	1861269	1870074	+		chr3	52561951	52558832
IX	21.265	PMZ_0000350	scaffold_357	2030677	2036008	+		chr8	63938849	63930029
IX	30.242	PMZ_0004641	scaffold_196	276979	278163	-		chr1	193150299	193149475
IX	30.242	PMZ_0004643	scaffold_196	324425	325885	-		chr1	193150662	193149475
IX	30.242	PMZ_0004646	scaffold_196	359672	369192	-		chr1	200826433	200827121
IX	30.242	PMZ_0012748	scaffold_2970	6358	12513	-		chr1	210440368	210439408
IX	30.242	PMZ_0016830	scaffold_3915	1848	7480	+		chr1	11116817	11115016
IX	30.242	PMZ_0016831	scaffold_3915	27818	29045	+		chr1	236646465	236646647
IX	30.242	PMZ_0017551	scaffold_4267	15505	18651	+		chr1	21074146	21074039
IX	30.242	PMZ_0017550	scaffold_4267	1885	11816	+		chr1	21097566	21097435
IX	30.242	PMZ_0012748	scaffold_2970	6358	12513	-		chr11	18283772	18284209
IX	30.242	PMZ_0016831	scaffold_3915	27818	29045	+		chr12	7024997	7025678
IX	30.242	PMZ_0012748	scaffold_2970	6358	12513	-		chr13	50746456	50746893
IX	30.242	PMZ_0012749	scaffold_2970	22396	41412	-		chr16	3790542	3779501
IX	30.242	PMZ_0012750	scaffold_2970	27294	27542	+		chr16	3779598	3779849
IX	30.242	PMZ_0012747	scaffold_2970	713	4923	+		chr16	4247917	4242160
IX	30.242	PMZ_0012751	scaffold_2970	28309	64556	+		chr17	80572253	80572002
IX	30.242	PMZ_0004635	scaffold_196	1235	2707	-		chr19	49575800	49573461
IX	30.242	PMZ_0004650	scaffold_196	430178	437865	-		chr2	99861922	99860460
IX	30.242	PMZ_0012749	scaffold_2970	22396	41412	-		chr22	41564398	41573142
IX	30.242	PMZ_0012750	scaffold_2970	27294	27542	+		chr22	41573057	41572803
IX	30.242	PMZ_0016610	scaffold_3424	13375	31001	-		chr3	194150904	194146072
IX	30.242	PMZ_0004648	scaffold_196	372809	391648	-		chr4	33240133	33239912
IX	30.242	PMZ_0012748	scaffold_2970	6358	12513	-		chr7	132855030	132854603
IX	30.242	PMZ_0004646	scaffold_196	359672	369192	-		chr9	138707068	138703218
IX	31.967	PMZ_0010797	scaffold_2368	86020	109039	-		chr1	1607934	1597284
IX	31.967	PMZ_0009550	scaffold_510	36693	44764	-		chr1	162546566	162560293
IX	35.417	PMZ_0011835	scaffold_901	56	1372	+		chr12	130648652	130649089
IX	35.417	PMZ_0011836	scaffold_901	52513	81118	+		chr22	32017874	32015604
IX	35.417	PMZ_0011835	scaffold_901	56	1372	+		chr7	72849526	72850086
IX	35.417	PMZ_0022395	scaffold_13022	697	6454	+		chr9	131882821	131891401
IX	46.62	PMZ_0002171	scaffold_76	463217	468454	-		chr1	220101782	220089100
IX	46.62	PMZ_0002164	scaffold_76	254901	257695	+		chr14	93934019	93954106
IX	46.62	PMZ_0002166	scaffold_76	263197	273980	+		chr14	94038222	94046653
IX	46.62	PMZ_0002170	scaffold_76	451267	456405	-		chr14	74951288	74947402
IX	46.62	PMZ_0002173	scaffold_76	552310	598657	-		chr14	64727512	64716265
IX	46.62	PMZ_0002159	scaffold_76	31706	69796	+		chr15	41821799	41809785
IX	46.62	PMZ_0002160	scaffold_76	125118	125687	+		chr18	163307	163450
IX	46.62	PMZ_0002158	scaffold_76	29766	30128	+		chr6	44243977	44244210
IX	46.62	PMZ_0002175	scaffold_76	713955	735264	-		chr6	43745205	43745420
IX	62.336	PMZ_0012328	scaffold_1271	23466	45021	-		chr17	58156179	58121128
IX	62.336	PMZ_0016264	scaffold_3181	15963	25478	+		chr17	57043114	57057609
IX	62.336	PMZ_0012329	scaffold_1271	48998	62425	+		chr2	178417320	178416301
IX	62.336	PMZ_0012330	scaffold_1271	73300	75661	+		chr2	178416306	178416022
IX	62.336	PMZ_0010415	scaffold_3295	222	1841	-		chr5	172197892	172197587
IX	62.336	PMZ_0010415	scaffold_3295	222	1841	-		chr8	29207663	29207361
IX	70.331	PMZ_0014430	scaffold_3855	30644	43630	-		chr17	36065059	36059064
IX	76.433	PMZ_0013876	scaffold_1713	41	13172	+		chr16	30078576	30081530
IX	76.433	PMZ_0013876	scaffold_1713	41	13172	+		chr17	26902550	26900750
IX	76.433	PMZ_0013880	scaffold_1713	49761	50426	+		chr2	204180425	204180122
IX	76.433	PMZ_0013881	scaffold_1713	49971	54204	-		chr2	130910744	130910272
IX	76.433	PMZ_0013878	scaffold_1713	28576	40908	+		chr22	20939187	20940982
IX	76.433	PMZ_0013880	scaffold_1713	49761	50426	+		chr9	104153068	104152757
IX	80.138	PMZ_0013524	scaffold_2507	20206	32432	-		chr15	63637819	63631028
IX	80.138	PMZ_0014422	scaffold_1996	33	4302	+		chr17	1359411	1326822
IX	80.138	PMZ_0005627	scaffold_453	719	20138	+		chr17	35487090	35444263
IX	80.138	PMZ_0011409	scaffold_756	27766	36309	-		chr18	13825978	13826691
IX	80.138	PMZ_0014424	scaffold_1996	40455	47210	-		chr2	208977232	208972957
IX	80.138	PMZ_0014423	scaffold_1996	14994	30717	-		chr22	20819869	20796462
IX	80.138	PMZ_0014422	scaffold_1996	33	4302	+		chr22	21272229	21304127
IX	80.138	PMZ_0014724	scaffold_2190	2712	15502	+		chr22	25016300	25024307
IX	80.138	PMZ_0014727	scaffold_2190	34493	44616	-		chr22	18775409	18762629
IX	80.138	PMZ_0005628	scaffold_453	355818	362901	-		chr22	23495218	23503202
IX	80.138	PMZ_0013524	scaffold_2507	20206	32432	-		chr8	86351937	86358529
IX	83.576	PMZ_0008243	scaffold_652	180762	202424	-		chr16	31495994	31501853
IX	83.576	PMZ_0008241	scaffold_652	154365	159884	+		chr2	127315745	127315037
IX	83.576	PMZ_0008241	scaffold_652	154365	159884	+		chr20	43530184	43534749
IX	83.576	PMZ_0008237	scaffold_652	37812	48581	-		chr21	45397925	45401013
IX	83.576	PMZ_0008240	scaffold_652	100717	145580	+		chr22	32160900	32241184
IX	83.576	PMZ_0008241	scaffold_652	154365	159884	+		chr22	32352126	32352770
IX	83.576	PMZ_0008242	scaffold_652	155477	161545	-		chr22	32352752	32352528
IX	83.576	PMZ_0008243	scaffold_652	180762	202424	-		chr22	32462922	32500847
IX	83.576	PMZ_0008241	scaffold_652	154365	159884	+		chr7	75959550	75958906
IX	88.605	PMZ_0013991	scaffold_1960	18145	38100	-		chr12	122242704	122268142
IX	88.605	PMZ_0013990	scaffold_1960	6403	17662	+		chr7	75609651	75615172
IX	88.605	PMZ_0013994	scaffold_1960	45840	53396	+		chrX	54577987	54578408
IX	89.746	PMZ_0007429	scaffold_146	33568	51880	+		chr12	120173162	120139424
IX	89.746	PMZ_0007430	scaffold_146	52827	59241	+		chr12	120135860	120135448
IX	89.746	PMZ_0007437	scaffold_146	156630	158946	-		chr2	219537553	219541004
IX	89.746	PMZ_0007438	scaffold_146	164154	179597	+		chr22	23482601	23481026
IX	89.746	PMZ_0007432	scaffold_146	90071	111107	+		chrX	71427725	71426466
IX	93.607	PMZ_0004712	scaffold_197	406769	419593	+		chr17	32959720	32962109
IX	93.607	PMZ_0004713	scaffold_197	439603	440643	+		chr17	32964241	32965101
IX	95.948	PMZ_0011706	scaffold_1080	57145	82665	+		chr11	59376226	59344053
IX	100.982	PMZ_0010322	scaffold_392	28092	44173	+		chr12	123444779	123414509
IX	100.982	PMZ_0010321	scaffold_392	345	23666	+		chr16	4852457	4848072
IX	100.982	PMZ_0010323	scaffold_392	48045	80426	+		chr22	24581063	24584096
IX	111.437	PMZ_0011689	scaffold_1001	15956	19065	+		chr11	58956628	58956804
IX	111.437	PMZ_0011690	scaffold_1001	20902	26719	+		chr11	58959586	58972361
IX	111.437	PMZ_0011690	scaffold_1001	20902	26719	+		chr12	113532609	113534732
IX	111.437	PMZ_0013837	scaffold_1694	2601	9263	+		chr12	110989777	110974845
IX	111.437	PMZ_0013841	scaffold_1694	42898	54403	-		chr12	113745646	113737594
IX	111.437	PMZ_0008255	scaffold_2638	13583	20436	-		chr16	50257085	50258877
IX	111.437	PMZ_0011691	scaffold_1001	41319	44750	+		chr17	34079812	34079654
IX	111.437	PMZ_0011692	scaffold_1001	55109	60308	+		chr17	34074967	34074836
IX	111.437	PMZ_0014175	scaffold_1947	498	6646	-		chr17	1268350	1257485
IX	111.437	PMZ_0010475	scaffold_455	41047	67146	-		chr17	32957018	32965083
IX	111.437	PMZ_0010476	scaffold_455	89774	89980	-		chr17	32956023	32956220
IX	111.437	PMZ_0013839	scaffold_1694	22976	34538	+		chr22	29966502	29956691
IX	111.437	PMZ_0014177	scaffold_1947	36111	45697	+		chr22	24384231	24376489
IX	111.437	PMZ_0008256	scaffold_2638	183731	186212	+		chr22	30952148	30950943
IX	111.437	PMZ_0008258	scaffold_2638	202036	212913	+		chr22	30742513	30734880
IX	111.437	PMZ_0008255	scaffold_2638	13583	20436	-		chr5	6746318	6749823
IX	111.437	PMZ_0013838	scaffold_1694	13377	20040	-		chr7	27498492	27497824
IX	111.437	PMZ_0013839	scaffold_1694	22976	34538	+		chr7	56045793	56062680
IX	111.437	PMZ_0014176	scaffold_1947	23899	26488	-		chr9	104238966	104238190
IX	122.768	PMZ_0016943	scaffold_3797	1153	14145	+		chr10	134537214	134536945
IX	122.768	PMZ_0016944	scaffold_3797	12667	19275	-		chr12	132423718	132426498
IX	122.768	PMZ_0021017	scaffold_9231	2871	3575	+		chr12	122079133	122079471
IX	122.768	PMZ_0006596	scaffold_993	226651	251160	+		chr2	69784111	69754345
IX	122.768	PMZ_0022555	scaffold_13651	72	2237	-		chr22	24236956	24237138
IX	122.768	PMZ_0006592	scaffold_993	55425	70879	+		chr22	21341779	21351625
IX	122.768	PMZ_0006593	scaffold_993	65625	67948	-		chr22	21351255	21350255
IX	122.768	PMZ_0006594	scaffold_993	68171	72909	-		chr22	24944085	24939958
IX	122.768	PMZ_0006595	scaffold_993	217120	225157	-		chr3	155894387	155893727
IX	122.768	PMZ_0006597	scaffold_993	256030	271330	-		chr4	108935587	108955507
IX	122.768	PMZ_0016945	scaffold_3797	20507	22279	-		chr6	160212022	160218562
IX	122.768	PMZ_0023384	scaffold_17092	17	2909	-		chr7	56142276	56145878
IX	122.768	PMZ_0021017	scaffold_9231	2871	3575	+		chr7	102087146	102087466
IX	122.961	PMZ_0023648	scaffold_18434	1143	3777	+		chr11	67808739	67810207
IX	123.155	PMZ_0019724	scaffold_6911	3427	3900	+		chr17	1798282	1800454
IX	123.155	PMZ_0019722	scaffold_6911	37	3009	+		chr17	1791966	1795228
IX	123.155	PMZ_0019725	scaffold_6911	6054	15916	+		chr22	21224622	21224762
IX	123.437	PMZ_0008770	scaffold_1780	144366	186690	+		chr12	124371572	124420025
IX	123.437	PMZ_0008771	scaffold_1780	192383	194503	-		chr12	124428008	124427895
IX	123.437	PMZ_0009565	scaffold_5752	144745	147960	-		chr12	123252067	123253471
IX	123.437	PMZ_0014091	scaffold_24807	15310	40064	+		chr17	1585574	1554099
IX	123.437	PMZ_0014090	scaffold_24807	279	5879	+		chr17	19584980	19584620
IX	123.437	PMZ_0014090	scaffold_24807	279	5879	+		chr4	68942672	68942347
IX	123.437	PMZ_0009567	scaffold_5752	170153	174706	-		chr5	147784256	147793898
IX	123.437	PMZ_0008769	scaffold_1780	251	4545	+		chr7	100962316	100958421
IX	125.191	PMZ_0015264	scaffold_3143	26324	40126	-		chr12	123473342	123470622
IX	125.191	PMZ_0015264	scaffold_3143	26324	40126	-		chr17	6373651	6358697
IX	125.191	PMZ_0015261	scaffold_3143	12595	20079	-		chr2	65432285	65433031
IX	125.191	PMZ_0015261	scaffold_3143	12595	20079	-		chrX	49397946	49397196
IX	127.169	PMZ_0015361	scaffold_2736	2	15530	-		chr17	27370265	27372023
L	11.548	PMZ_0016457	scaffold_3368	7458	25375	+		chr12	50146754	50153105
L	14.088	PMZ_0011048	scaffold_3577	4219	8115	-		chr16	81279079	81295855
L	14.088	PMZ_0011049	scaffold_3577	10721	22897	-		chr8	87151690	87165203
L	18.455	PMZ_0019421	scaffold_6836	9838	16983	+		chr17	40327680	40321495
L	38.167	PMZ_0002648	scaffold_117	2278	10890	-		chr1	22333868	22336359
L	38.167	PMZ_0002657	scaffold_117	466929	477911	-		chr12	56212784	56214176
L	38.167	PMZ_0002658	scaffold_117	492870	493810	-		chr12	58163452	58163080
L	38.167	PMZ_0002657	scaffold_117	466929	477911	-		chr17	38080456	38078806
L	38.167	PMZ_0002657	scaffold_117	466929	477911	-		chr2	190647321	190636496
L	38.167	PMZ_0013944	scaffold_25009	3322	20005	+		chr2	203383539	203397454
L	38.167	PMZ_0002649	scaffold_117	187256	203912	-		chr21	46281222	46281073
L	38.167	PMZ_0002660	scaffold_117	641488	652265	+		chr3	38181890	38182765
L	38.167	PMZ_0022528	scaffold_13524	2	4520	-		chr3	132387674	132391022
L	38.167	PMZ_0002650	scaffold_117	227932	230116	-		chr6	53365122	53363641
L	41.796	PMZ_0014892	scaffold_2268	5780	19960	+		chr2	220044845	220045890
LI	17.76	PMZ_0004267	scaffold_3795	58474	70464	+		chr13	96086112	96086297
LI	17.76	PMZ_0004271	scaffold_3795	103814	126970	-		chr17	78087068	78092102
LI	17.76	PMZ_0004275	scaffold_3795	406768	425852	-		chr17	78082073	78082630
LI	17.76	PMZ_0004267	scaffold_3795	58474	70464	+		chr17	7165365	7164138
LI	17.76	PMZ_0004276	scaffold_3795	466122	475657	-		chr3	164786986	164785127
LI	17.76	PMZ_0004275	scaffold_3795	406768	425852	-		chr7	141726905	141730296
LI	17.76	PMZ_0004270	scaffold_3795	80229	99237	-		chr7	141754554	141766519
LI	28.934	PMZ_0013620	scaffold_2082	37815	53824	+		chr11	102056742	102056858
LII	3.45	PMZ_0011506	scaffold_1000	13667	45901	-		chr12	498203	432762
LII	3.45	PMZ_0011507	scaffold_1000	79521	93092	-		chr3	12962095	12950768
LII	3.45	PMZ_0011505	scaffold_1000	4419	12499	+		chr4	1701415	1697940
LII	3.45	PMZ_0011506	scaffold_1000	13667	45901	-		chrX	53254032	53228158
LII	29.853	PMZ_0008557	scaffold_1437	180834	188089	+		chr1	205138963	205130441
LII	34.183	PMZ_0015092	scaffold_2893	5030	10734	-		chr1	60381805	60366635
LII	34.183	PMZ_0015092	scaffold_2893	5030	10734	-		chr10	135341982	135352366
LII	34.183	PMZ_0015092	scaffold_2893	5030	10734	-		chr19	41622357	41633945
LII	34.183	PMZ_0015093	scaffold_2893	22968	24142	+		chr22	42548491	42546785
LII	34.183	PMZ_0015092	scaffold_2893	5030	10734	-		chr22	42539585	42536307
LII	34.183	PMZ_0015092	scaffold_2893	5030	10734	-		chr4	108866098	108871561
LII	35.982	PMZ_0000603	scaffold_1403	1698530	1702812	+		chr1	205041030	205041269
LII	35.982	PMZ_0000573	scaffold_1403	271242	276849	-		chr1	79120766	79128544
LII	35.982	PMZ_0000572	scaffold_1403	263175	270054	-		chr10	32800647	32800276
LII	35.982	PMZ_0000564	scaffold_1403	129001	150013	+		chr15	43675526	43696748
LII	35.982	PMZ_0000576	scaffold_1403	435222	451490	-		chr15	73566157	73566348
LII	35.982	PMZ_0000574	scaffold_1403	306614	311968	-		chr22	30198173	30196979
LII	35.982	PMZ_0000565	scaffold_1403	150643	151020	+		chr3	165548761	165548438
LII	35.982	PMZ_0000566	scaffold_1403	153232	157469	+		chr3	165548413	165548096
LII	35.982	PMZ_0000601	scaffold_1403	1619630	1621933	+		chr3	74418526	74413604
LII	35.982	PMZ_0000569	scaffold_1403	193049	194466	+		chr3	165547705	165547439
LII	35.982	PMZ_0000565	scaffold_1403	150643	151020	+		chr7	100491730	100491449
LII	35.982	PMZ_0000566	scaffold_1403	153232	157469	+		chr7	100491421	100491104
LII	35.982	PMZ_0000569	scaffold_1403	193049	194466	+		chrX	5821551	5821267
LII	39.441	PMZ_0009050	scaffold_3487	28	7254	-		chr3	53857864	53857523
LII	41.17	PMZ_0023356	scaffold_16969	3752	4961	-		chr3	53854624	53853559
LII	41.17	PMZ_0020136	scaffold_7580	5014	13173	-		chr3	52889470	52883806
LIII	0	PMZ_0015555	scaffold_2816	18676	23569	-		chr8	116426928	116426260
LIII	7.872	PMZ_0013204	scaffold_1405	7953	12065	-		chr1	34401547	34383694
LIII	11.446	PMZ_0006780	scaffold_940	223760	233062	+		chr10	101502954	101507147
LIII	11.446	PMZ_0006776	scaffold_940	46905	47820	-		chr10	105209683	105209144
LIII	11.446	PMZ_0006777	scaffold_940	64524	69516	-		chr10	105207319	105206927
LIII	11.446	PMZ_0006774	scaffold_940	1054	24349	-		chr6	131222319	131203786
LIII	11.446	PMZ_0006779	scaffold_940	215499	262876	-		chr9	136213568	136213395
LIII	11.446	PMZ_0006781	scaffold_940	238581	246768	+		chr9	106857666	106877116
LIII	11.446	PMZ_0006782	scaffold_940	272151	281320	+		chr9	106891926	106896854
LIII	33.339	PMZ_0010785	scaffold_555	72553	83575	+		chr1	32201260	32198573
LIII	33.339	PMZ_0010784	scaffold_555	55199	56029	+		chr6	70034761	70034916
LIII	33.339	PMZ_0010781	scaffold_555	21153	26044	+		chr8	143561050	143563072
LIII	36.789	PMZ_0011666	scaffold_24856	67190	77124	-		chr11	56099282	56098877
LIII	36.789	PMZ_0006616	scaffold_3379	25831	28157	-		chr12	18845796	18846595
LIII	36.789	PMZ_0006616	scaffold_3379	25831	28157	-		chr14	90729661	90734773
LIII	36.789	PMZ_0006617	scaffold_3379	31554	40521	-		chr14	90429528	90459825
LIII	36.789	PMZ_0011666	scaffold_24856	67190	77124	-		chr2	150177425	150177898
LIII	36.789	PMZ_0015213	scaffold_2548	6274	33132	-		chr2	9098774	9098625
LIII	36.789	PMZ_0006616	scaffold_3379	25831	28157	-		chr2	17566442	17567247
LIII	36.789	PMZ_0006618	scaffold_3379	43230	56055	-		chr2	48063100	48050281
LIII	36.789	PMZ_0006616	scaffold_3379	25831	28157	-		chr3	68684940	68685737
LIII	36.789	PMZ_0006616	scaffold_3379	25831	28157	-		chr5	55572371	55571570
LIII	36.789	PMZ_0011665	scaffold_24856	43928	47611	-		chr6	41433517	41433846
LIII	36.789	PMZ_0011666	scaffold_24856	67190	77124	-		chr6	17605135	17608513
LIII	36.789	PMZ_0011668	scaffold_24856	82005	86374	+		chr6	131946132	131941765
LIII	36.789	PMZ_0015213	scaffold_2548	6274	33132	-		chr6	20153012	20152854
LIV	0	PMZ_0008837	scaffold_4338	185237	195697	+		chr11	57235180	57235401
LIV	0	PMZ_0008837	scaffold_4338	185237	195697	+		chr17	38100352	38100591
LIV	3.664	PMZ_0008723	scaffold_3381	18602	22922	-		chr1	156824096	156823548
LIV	3.664	PMZ_0008723	scaffold_3381	18602	22922	-		chr15	99250787	99251332
LIV	3.664	PMZ_0008724	scaffold_3381	158686	166767	+		chr18	47091737	47101953
LIV	3.664	PMZ_0008723	scaffold_3381	18602	22922	-		chr19	7267920	7267360
LIV	3.664	PMZ_0013848	scaffold_1679	21357	35577	-		chr3	44816819	44844476
LIV	3.664	PMZ_0013849	scaffold_1679	41123	51895	+		chr5	10377909	10390570
LIV	3.664	PMZ_0015330	scaffold_2639	2263	13797	+		chr5	10405631	10433754
LIV	3.664	PMZ_0013565	scaffold_1574	8519	58121	+		chr7	35903155	35922186
LIV	12.134	PMZ_0016871	scaffold_3661	4281	19225	-		chr5	894900	912108
LIV	24.687	PMZ_0005673	scaffold_309	176807	193152	-		chr11	11374351	11373938
LIV	24.687	PMZ_0020742	scaffold_8654	2109	10705	+		chr18	77455975	77475527
LIV	24.687	PMZ_0005673	scaffold_309	176807	193152	-		chr20	479949	470418
LIV	37.24	PMZ_0014171	scaffold_2935	9306	14839	+		chr1	45271932	45271684
LIV	37.24	PMZ_0022370	scaffold_12947	1942	6608	+		chr20	33575823	33578627
LIV	37.24	PMZ_0022370	scaffold_12947	1942	6608	+		chr3	108189068	108178210
LIV	37.24	PMZ_0014172	scaffold_2935	19328	34450	+		chr8	145634542	145624181
LIV	38.965	PMZ_0004041	scaffold_995	212760	221903	-		chr11	61734882	61732220
LIV	38.965	PMZ_0004043	scaffold_995	232492	266799	-		chr16	74537653	74499511
LIV	38.965	PMZ_0004045	scaffold_995	359518	365561	+		chr16	67188860	67188585
LIV	38.965	PMZ_0004046	scaffold_995	368328	369512	-		chr16	58438430	58438642
LIV	38.965	PMZ_0004047	scaffold_995	370949	377984	+		chr16	56423298	56403105
LIV	38.965	PMZ_0004036	scaffold_995	43097	54899	+		chr16	58540804	58543255
LIV	38.965	PMZ_0005918	scaffold_3524	66381	68160	+		chr18	76756955	76755357
LIV	38.965	PMZ_0005921	scaffold_3524	178803	182582	-		chr19	31038849	31038959
LIV	38.965	PMZ_0005923	scaffold_3524	192305	192775	-		chr19	30934842	30935012
LIV	38.965	PMZ_0004041	scaffold_995	212760	221903	-		chr19	49468765	49469980
LIV	38.965	PMZ_0009530	scaffold_2900	156989	171854	+		chr20	37617483	37662963
LIV	38.965	PMZ_0015259	scaffold_4541	503	16025	-		chr20	60584245	60575606
LIV	38.965	PMZ_0004040	scaffold_995	190092	212239	+		chr3	43621962	43596767
LIV	38.965	PMZ_0005919	scaffold_3524	66924	71350	-		chrX	49432060	49429827
LIX	0	PMZ_0007793	scaffold_422	146132	155572	-		chr6	56535605	56535459
LIX	0	PMZ_0007791	scaffold_422	2088	29503	-		chr6	56362284	56328486
LIX	0	PMZ_0007792	scaffold_422	30811	65469	-		chr6	56422320	56365923
LIX	0	PMZ_0007793	scaffold_422	146132	155572	-		chr8	145010185	145010036
LIX	0	PMZ_0007794	scaffold_422	204773	206624	-		chr8	145024874	145024512
LIX	3.45	PMZ_0007341	scaffold_313	177846	194300	-		chr6	56485330	56473432
LIX	3.45	PMZ_0007342	scaffold_313	200446	220724	-		chr6	56504858	56489328
LIX	3.45	PMZ_0007336	scaffold_313	1848	20301	+		chr8	67364147	67372706
LIX	3.45	PMZ_0007344	scaffold_313	234176	235372	-		chr8	145009465	145008975
LIX	7.437	PMZ_0018864	scaffold_5828	8621	19214	+		chr20	60897812	60895795
LIX	10.675	PMZ_0020366	scaffold_8146	643	7188	+		chr20	60910323	60909242
LIX	10.675	PMZ_0020367	scaffold_8146	8747	12745	+		chr20	60904973	60904196
LIX	11.435	PMZ_0022773	scaffold_14446	48	5225	+		chr6	52147661	52138538
LIX	11.939	PMZ_0011713	scaffold_24840	58931	66286	-		chr2	19553509	19552072
LIX	11.939	PMZ_0007359	scaffold_468	192550	202864	+		chr2	1665966	1648389
LIX	11.939	PMZ_0007360	scaffold_468	200002	201564	-		chr2	1652066	1653343
LIX	11.939	PMZ_0007362	scaffold_468	222093	233406	-		chr2	1271188	1271343
LIX	11.939	PMZ_0007354	scaffold_468	23667	37254	+		chr2	9514885	9519187
LIX	11.939	PMZ_0007356	scaffold_468	47665	57344	-		chr2	9548361	9547578
LIX	11.939	PMZ_0011712	scaffold_24840	11130	14512	-		chr8	100026014	100026133
LIX	11.939	PMZ_0011713	scaffold_24840	58931	66286	-		chr8	99961238	99962983
LIX	11.939	PMZ_0007354	scaffold_468	23667	37254	+		chr8	131130914	131129103
LIX	13.856	PMZ_0019325	scaffold_6318	4	10981	-		chr20	47991529	47990288
LIX	13.856	PMZ_0019325	scaffold_6318	4	10981	-		chr8	73848170	73849444
LIX	17.305	PMZ_0017931	scaffold_4642	5443	19009	+		chr18	19383871	19399608
LIX	17.305	PMZ_0019051	scaffold_6521	135	15058	-		chr6	17856363	17837106
LIX	20.773	PMZ_0013239	scaffold_1439	7952	41228	-		chr20	58416450	58416587
LIX	20.773	PMZ_0013239	scaffold_1439	7952	41228	-		chr6	13283654	13283791
LIX	22.515	PMZ_0004895	scaffold_120	136407	137408	+		chr1	5876855	5877481
LIX	22.515	PMZ_0004900	scaffold_120	246998	255114	+		chr1	41949854	41949693
LIX	22.515	PMZ_0004887	scaffold_120	9486	15187	-		chr1	32384672	32374456
LIX	22.515	PMZ_0004895	scaffold_120	136407	137408	+		chr11	119361393	119360914
LIX	22.515	PMZ_0004900	scaffold_120	246998	255114	+		chr20	57876659	57876778
LIX	22.515	PMZ_0004903	scaffold_120	417522	424163	-		chr20	55750064	55746018
LIX	22.515	PMZ_0013601	scaffold_3213	6834	7531	+		chr20	55841076	55840762
LIX	22.515	PMZ_0004896	scaffold_120	175842	196055	+		chr6	12121244	12124210
LIX	22.515	PMZ_0004901	scaffold_120	388064	407625	+		chr6	53381064	53372207
LIX	22.515	PMZ_0004903	scaffold_120	417522	424163	-		chr6	55625335	55620334
LIX	22.515	PMZ_0004892	scaffold_120	73730	96506	+		chr6	134494519	134491409
LIX	22.515	PMZ_0004887	scaffold_120	9486	15187	-		chr6	64286786	64290076
LIX	22.515	PMZ_0004890	scaffold_120	29059	37794	-		chr8	145651157	145649191
LIX	22.515	PMZ_0004891	scaffold_120	43380	55299	-		chr8	110590218	110588029
LIX	22.515	PMZ_0011065	scaffold_864	25088	25873	+		chr8	127569634	127568816
LV	3.539	PMZ_0004854	scaffold_9091	28685	28912	+		chr17	1959997	1960221
LV	3.539	PMZ_0004858	scaffold_9091	385973	396691	-		chr17	27209480	27207731
LV	10.694	PMZ_0013576	scaffold_7483	166	14135	+		chr2	96956544	96952032
LV	17.849	PMZ_0013407	scaffold_1591	41802	46420	-		chr11	57426949	57428905
LV	17.849	PMZ_0010682	scaffold_542	79856	83979	-		chr11	59575323	59573832
LV	17.849	PMZ_0010684	scaffold_542	97146	102389	+		chr12	120741407	120750833
LV	17.849	PMZ_0018146	scaffold_5432	8351	18221	+		chr16	30078576	30081530
LV	17.849	PMZ_0010680	scaffold_542	52000	62077	+		chr17	57043060	57057618
LV	17.849	PMZ_0010681	scaffold_542	70574	77811	-		chr17	686324	695264
LV	17.849	PMZ_0018146	scaffold_5432	8351	18221	+		chr17	26902547	26900678
LV	17.849	PMZ_0013405	scaffold_1591	16365	24047	+		chr18	25570311	25565487
LV	17.849	PMZ_0010683	scaffold_542	86521	95828	-		chr2	201756748	201768398
LV	17.849	PMZ_0013405	scaffold_1591	16365	24047	+		chr20	60498512	60503486
LV	17.849	PMZ_0018146	scaffold_5432	8351	18221	+		chr9	104193169	104187122
LV	38.929	PMZ_0013070	scaffold_1371	920	62679	-		chr17	58313603	58262818
LVI	3.45	PMZ_0008062	scaffold_955	31270	37472	+		chr1	203668641	203669464
LVI	3.45	PMZ_0022165	scaffold_12237	787	7321	+		chr12	64818816	64828689
LVI	3.45	PMZ_0016820	scaffold_3650	1496	11014	-		chr12	40265762	40265598
LVI	3.45	PMZ_0008063	scaffold_955	165412	168126	-		chr12	266695	271240
LVI	3.45	PMZ_0008064	scaffold_955	171555	185034	-		chr12	250189	266314
LVI	3.45	PMZ_0008061	scaffold_955	2276	16575	+		chr12	90049663	90035936
LVI	3.45	PMZ_0022779	scaffold_14471	741	6250	+		chr3	128864717	128853679
LVI	3.45	PMZ_0008063	scaffold_955	165412	168126	-		chr3	12962095	12957094
LVI	3.45	PMZ_0008064	scaffold_955	171555	185034	-		chr3	12966265	12963619
LVI	3.45	PMZ_0008062	scaffold_955	31270	37472	+		chr3	10443979	10442635
LVI	3.45	PMZ_0008063	scaffold_955	165412	168126	-		chrX	53276316	53272526
LVI	3.45	PMZ_0008064	scaffold_955	171555	185034	-		chrX	53278081	53277295
LVI	3.45	PMZ_0008061	scaffold_955	2276	16575	+		chrX	152801706	152807013
LVI	3.45	PMZ_0008062	scaffold_955	31270	37472	+		chrX	152807180	152807908
LVI	8.752	PMZ_0008269	scaffold_231	74124	76644	+		chr3	3886827	3888170
LVI	8.752	PMZ_0007264	scaffold_1131	30235	32290	+		chr9	131295788	131300366
LVI	8.752	PMZ_0007267	scaffold_1131	215230	253148	+		chrX	54495300	54472659
LVI	15.417	PMZ_0017623	scaffold_5695	1913	9936	-		chr1	113057506	113063095
LVI	15.417	PMZ_0017623	scaffold_5695	1913	9936	-		chr22	46319218	46318739
LVI	15.417	PMZ_0017623	scaffold_5695	1913	9936	-		chr3	13860923	13860444
LVI	19.544	PMZ_0014784	scaffold_2215	757	12611	-		chr1	204921138	204926947
LVI	19.544	PMZ_0014784	scaffold_2215	757	12611	-		chrX	153138153	153136240
LVI	20.406	PMZ_0017421	scaffold_4627	5430	26257	-		chr3	71026871	71021690
LVI	21.269	PMZ_0004002	scaffold_543	314856	326657	+		chr1	205035628	205039185
LVI	21.269	PMZ_0004003	scaffold_543	356445	368303	+		chr1	205041072	205041221
LVI	21.269	PMZ_0003996	scaffold_543	35903	36601	+		chr2	239326371	239326859
LVI	21.269	PMZ_0004002	scaffold_543	314856	326657	+		chr3	1415287	1424859
LVI	21.269	PMZ_0004001	scaffold_543	292255	299120	-		chr6	127476385	127476579
LVI	21.269	PMZ_0004001	scaffold_543	292255	299120	-		chr8	108970491	108970315
LVI	38.304	PMZ_0009918	scaffold_3133	3826	14536	-		chr1	206224501	206225382
LVI	38.304	PMZ_0009918	scaffold_3133	3826	14536	-		chr12	63544481	63541298
LVI	38.304	PMZ_0009918	scaffold_3133	3826	14536	-		chr3	8809774	8794753
LVII	3.45	PMZ_0009419	scaffold_1402	21439	56692	+		chr12	49447998	49440033
LVII	3.45	PMZ_0003498	scaffold_326	390864	402939	+		chr12	49171998	49170886
LVII	3.45	PMZ_0003500	scaffold_326	525418	546350	+		chr2	170798992	170806549
LVII	3.45	PMZ_0003496	scaffold_326	229726	235212	+		chr3	123166591	123166250
LVII	3.45	PMZ_0003493	scaffold_326	34497	43711	+		chr3	122647462	122642464
LVII	3.45	PMZ_0003497	scaffold_326	380760	383455	+		chr3	123023015	123018966
LVII	3.45	PMZ_0003499	scaffold_326	415030	418044	+		chr3	123038655	123038518
LVII	3.45	PMZ_0009421	scaffold_1402	57336	62849	+		chr7	151878671	151878216
LVII	10.603	PMZ_0017980	scaffold_4671	339	10913	+		chr2	151331502	151326642
LVII	15.906	PMZ_0002740	scaffold_194	330071	337074	-		chr1	228333208	228336157
LVII	15.906	PMZ_0002736	scaffold_194	51667	84003	-		chr11	17793850	17793524
LVII	15.906	PMZ_0012737	scaffold_1246	119	27270	-		chr12	50829257	50835420
LVII	15.906	PMZ_0012737	scaffold_1246	119	27270	-		chr15	36909290	36910085
LVII	15.906	PMZ_0002738	scaffold_194	292729	293588	+		chr17	42750731	42750913
LVII	15.906	PMZ_0002739	scaffold_194	300051	313849	+		chr17	40970701	40966541
LVII	15.906	PMZ_0002736	scaffold_194	51667	84003	-		chr19	50826692	50826988
LVII	21.08	PMZ_0012634	scaffold_1682	708	39111	+		chr10	1130340	1175281
LVII	21.08	PMZ_0012636	scaffold_1682	45289	65838	-		chr21	46603266	46642103
LVII	22.805	PMZ_0007209	scaffold_628	233657	236069	+		chr1	146522655	146522786
LVII	22.805	PMZ_0007204	scaffold_628	40446	62071	-		chr10	35349896	35299242
LVII	22.805	PMZ_0007209	scaffold_628	233657	236069	+		chr12	42680989	42681114
LVII	22.805	PMZ_0007210	scaffold_628	237911	252348	+		chr12	48457609	48439108
LVII	22.805	PMZ_0007205	scaffold_628	71300	78380	+		chr17	40091470	40095030
LVII	22.805	PMZ_0007206	scaffold_628	135252	147123	+		chr3	185641772	185639801
LVII	22.805	PMZ_0007209	scaffold_628	233657	236069	+		chr6	167116054	167115935
LVII	22.805	PMZ_0007206	scaffold_628	135252	147123	+		chr7	23552701	23547041
LVII	23.653	PMZ_0005961	scaffold_595	1912	14905	-		chr2	170753014	170782251
LVII	23.653	PMZ_0005962	scaffold_595	21231	33451	-		chr2	170684288	170684587
LVII	24.501	PMZ_0007612	scaffold_24947	139447	148742	-		chr10	32197747	32197559
LVII	24.501	PMZ_0009853	scaffold_5237	166395	166868	+		chr12	54577685	54577434
LVII	24.501	PMZ_0007614	scaffold_24947	179338	185817	-		chr2	169791938	169780135
LVII	24.501	PMZ_0007613	scaffold_24947	166109	177207	+		chr5	10250453	10264886
LVII	26.226	PMZ_0002962	scaffold_282	51262	64955	-		chr1	182929266	182928224
LVII	26.226	PMZ_0002966	scaffold_282	427257	427544	-		chr10	5567202	5567441
LVII	26.226	PMZ_0013179	scaffold_1492	47394	59798	-		chr12	42681855	42682296
LVII	26.226	PMZ_0002959	scaffold_282	18026	35265	+		chr12	52369057	52387867
LVII	26.226	PMZ_0002963	scaffold_282	67546	74782	+		chr12	53295856	53292462
LVII	26.226	PMZ_0002966	scaffold_282	427257	427544	-		chr13	41745132	41744899
LVII	26.226	PMZ_0002966	scaffold_282	427257	427544	-		chr14	90870205	90870812
LVII	26.226	PMZ_0013178	scaffold_1492	345	21499	-		chr17	43307977	43313629
LVII	26.226	PMZ_0013179	scaffold_1492	47394	59798	-		chr17	47121338	47123744
LVII	26.226	PMZ_0002964	scaffold_282	350805	379249	-		chr17	47699317	47700173
LVII	26.226	PMZ_0002962	scaffold_282	51262	64955	-		chr17	39645852	39643210
LVII	26.226	PMZ_0017680	scaffold_4513	8583	25261	-		chr17	43322625	43323100
LVII	26.226	PMZ_0002966	scaffold_282	427257	427544	-		chr19	47111738	47112192
LVII	26.226	PMZ_0002965	scaffold_282	354439	386048	+		chr2	139308053	139326647
LVII	26.226	PMZ_0002960	scaffold_282	37289	43855	+		chr2	219132337	219130554
LVII	26.226	PMZ_0002966	scaffold_282	427257	427544	-		chr2	47389532	47388908
LVII	26.226	PMZ_0002961	scaffold_282	44334	49524	+		chr2	219130002	219129745
LVII	26.226	PMZ_0002968	scaffold_282	475654	476511	-		chr2	139428851	139428507
LVII	26.226	PMZ_0013179	scaffold_1492	47394	59798	-		chr3	185375184	185364810
LVII	26.226	PMZ_0013179	scaffold_1492	47394	59798	-		chr7	23358870	23352348
LVII	26.226	PMZ_0002968	scaffold_282	475654	476511	-		chr7	8791040	8791396
LVII	26.226	PMZ_0002959	scaffold_282	18026	35265	+		chr9	101900155	101911560
LVII	26.226	PMZ_0002962	scaffold_282	51262	64955	-		chrX	91714903	91715936
LVII	29.676	PMZ_0014596	scaffold_2161	41190	45085	+		chr10	3167283	3176764
LVII	29.676	PMZ_0014596	scaffold_2161	41190	45085	+		chr12	48535697	48538915
LVII	29.676	PMZ_0014594	scaffold_2161	7158	24808	+		chr12	48525111	48527276
LVII	29.676	PMZ_0007052	scaffold_342	200241	206140	+		chr17	45917741	45915660
LVII	29.676	PMZ_0003283	scaffold_4265	174763	177576	-		chr17	42266628	42268157
LVII	29.676	PMZ_0002559	scaffold_539	605878	607606	+		chr17	61611313	61611672
LVII	29.676	PMZ_0002560	scaffold_539	621965	623005	+		chr17	61619595	61619747
LVII	29.676	PMZ_0002562	scaffold_539	700054	703725	-		chr17	61655825	61666531
LVII	29.676	PMZ_0007051	scaffold_342	199839	200072	+		chr2	175263018	175263146
LVII	29.676	PMZ_0007054	scaffold_342	214057	225266	-		chr2	175338132	175330511
LVII	29.676	PMZ_0007047	scaffold_342	39221	55936	-		chr2	174946794	174940166
LVII	29.676	PMZ_0003287	scaffold_4265	366097	374102	-		chr2	182339683	182340014
LVII	29.676	PMZ_0002559	scaffold_539	605878	607606	+		chr2	163302887	163302528
LVII	29.676	PMZ_0002560	scaffold_539	621965	623005	+		chr2	163253456	163253310
LVII	29.676	PMZ_0002557	scaffold_539	99630	103046	+		chr2	165383667	165383524
LVII	29.676	PMZ_0014595	scaffold_2161	29056	32422	+		chr21	45738362	45738475
LVII	29.676	PMZ_0014596	scaffold_2161	41190	45085	+		chr21	45743643	45745945
LVII	29.676	PMZ_0007056	scaffold_342	240084	264537	-		chr3	124692754	124689499
LVII	29.676	PMZ_0003286	scaffold_4265	361948	363871	-		chr3	37555254	37559102
LVII	29.676	PMZ_0003282	scaffold_4265	37738	50516	-		chr3	46940796	46944301
LVII	29.676	PMZ_0007046	scaffold_342	1144	14198	+		chr6	27236576	27236999
LVII	29.676	PMZ_0007046	scaffold_342	1144	14198	+		chr7	21943877	21942598
LVII	29.676	PMZ_0002559	scaffold_539	605878	607606	+		chr7	150649875	150649513
LVII	29.676	PMZ_0002560	scaffold_539	621965	623005	+		chr7	150646141	150645992
LVII	30.538	PMZ_0014204	scaffold_1918	10729	29068	-		chr17	42294073	42287674
LVII	30.538	PMZ_0014205	scaffold_1918	31779	43748	-		chr3	42740613	42734267
LVII	31.4	PMZ_0005586	scaffold_674	325356	332272	+		chr1	5935106	5934552
LVII	31.4	PMZ_0008127	scaffold_8259	28038	39757	+		chr1	200378089	200376794
LVII	31.4	PMZ_0015775	scaffold_2961	10122	22123	-		chr10	1038426	1058602
LVII	31.4	PMZ_0005582	scaffold_674	156822	157799	-		chr12	55420476	55420754
LVII	31.4	PMZ_0005582	scaffold_674	156822	157799	-		chr17	37762495	37762100
LVII	31.4	PMZ_0005582	scaffold_674	156822	157799	-		chr2	182543293	182543018
LVII	31.4	PMZ_0005583	scaffold_674	162815	178715	+		chr2	183867081	183843560
LVII	31.4	PMZ_0005584	scaffold_674	190931	205945	+		chr2	183832089	183790433
LVII	31.4	PMZ_0008126	scaffold_8259	8576	19960	-		chr2	237994608	238002842
LVII	31.4	PMZ_0008128	scaffold_8259	197918	203028	+		chr22	42504957	42504718
LVII	31.4	PMZ_0005582	scaffold_674	156822	157799	-		chr7	31378606	31378334
LVII	34.85	PMZ_0007774	scaffold_631	182325	192226	-		chr12	56421545	56429103
LVII	34.85	PMZ_0007769	scaffold_631	30885	53355	-		chr2	216189962	216213993
LVII	34.85	PMZ_0007768	scaffold_631	15357	25712	-		chr5	224475	231117
LVII	34.85	PMZ_0007774	scaffold_631	182325	192226	-		chr7	50450237	50468307
LVII	34.85	PMZ_0007773	scaffold_631	63698	69237	-		chr7	55259409	55268985
LVIII	0	PMZ_0002873	scaffold_514	128016	143497	+		chr16	90102791	90109750
LVIII	0	PMZ_0002880	scaffold_514	610665	620632	+		chr16	57490446	57494019
LVIII	0	PMZ_0002874	scaffold_514	149565	151621	+		chr6	16129554	16130979
LVIII	0	PMZ_0002882	scaffold_514	637235	647905	+		chr7	36194342	36194740
LVIII	27.19	PMZ_0021228	scaffold_9727	344	5440	-		chr15	25220505	25221563
LVIII	27.19	PMZ_0021228	scaffold_9727	344	5440	-		chr20	2448452	2446354
LVIII	28.914	PMZ_0020170	scaffold_7626	2308	14211	+		chr16	67645195	67650787
LVIII	30.639	PMZ_0009771	scaffold_1521	126021	142823	+		chr15	41763413	41772882
LVIII	30.639	PMZ_0009770	scaffold_1521	730	10460	+		chr5	133747452	133745606
LVIII	30.639	PMZ_0009770	scaffold_1521	730	10460	+		chrX	118724904	118724545
LVIII	34.322	PMZ_0012878	scaffold_2433	3334	11327	+		chr14	23894072	23896530
LVIII	34.322	PMZ_0012877	scaffold_2433	132	30186	-		chr17	10416099	10402288
LVIII	34.322	PMZ_0012879	scaffold_2433	16542	21648	+		chr17	10248516	10248913
LVIII	34.322	PMZ_0012880	scaffold_2433	36184	59910	+		chr17	39987141	39981811
LVIII	34.322	PMZ_0012881	scaffold_2433	55499	66290	-		chr17	39976526	39978657
LVIII	34.322	PMZ_0012880	scaffold_2433	36184	59910	+		chr4	118496844	118496256
LVIII	34.322	PMZ_0012880	scaffold_2433	36184	59910	+		chr7	33059335	33054345
LX	0	PMZ_0007927	scaffold_782	178267	181569	+		chr1	160053887	160054678
LX	0	PMZ_0018880	scaffold_5770	7226	13181	+		chr11	118889506	118891019
LX	0	PMZ_0007927	scaffold_782	178267	181569	+		chr11	128781304	128782113
LX	0	PMZ_0007929	scaffold_782	208044	216948	+		chr11	111782448	111779482
LX	0	PMZ_0007928	scaffold_782	188592	199986	+		chr19	36237292	36237745
LX	0	PMZ_0007927	scaffold_782	178267	181569	+		chr21	39087312	39086512
LX	0	PMZ_0007929	scaffold_782	208044	216948	+		chr21	44589210	44592303
LX	3.45	PMZ_0010903	scaffold_1597	4286	87881	+		chr11	121490456	121498478
LX	3.45	PMZ_0010903	scaffold_1597	4286	87881	+		chr9	2639867	2643752
LX	6.899	PMZ_0006839	scaffold_10067	224695	250633	+		chr11	118235796	118263608
LX	6.899	PMZ_0007083	scaffold_173	144741	149855	+		chr11	117308800	117307836
LX	6.899	PMZ_0007085	scaffold_173	163466	168620	+		chr11	117301732	117299047
LX	6.899	PMZ_0006837	scaffold_10067	211190	221928	-		chr19	40478303	40486372
LX	6.899	PMZ_0006840	scaffold_10067	253203	277860	-		chr19	42219613	42221657
LX	6.899	PMZ_0006836	scaffold_10067	31776	59323	-		chr19	35500789	35512508
LX	6.899	PMZ_0001637	scaffold_113	671572	671970	-		chr21	45876933	45877280
LX	6.899	PMZ_0007083	scaffold_173	144741	149855	+		chr21	41452268	41450606
LX	6.899	PMZ_0001637	scaffold_113	671572	671970	-		chr3	26751569	26751934
LX	15.541	PMZ_0003905	scaffold_233	513917	529688	-		chr1	26316146	26300970
LX	15.541	PMZ_0003879	scaffold_233	150793	156678	+		chr11	121039396	121058697
LX	15.541	PMZ_0003887	scaffold_233	231247	235707	-		chr11	117214866	117222638
LX	15.541	PMZ_0003899	scaffold_233	353210	370994	-		chr11	126110721	126124334
LX	15.541	PMZ_0003902	scaffold_233	420157	428437	-		chr11	62559373	62558104
LX	15.541	PMZ_0003873	scaffold_233	69152	69520	-		chr11	114401360	114401019
LX	15.541	PMZ_0003874	scaffold_233	90453	101012	+		chr11	120979920	120983858
LX	15.541	PMZ_0003891	scaffold_233	262210	271911	-		chr12	48110293	48105430
LX	15.541	PMZ_0003881	scaffold_233	172776	189227	-		chr13	38159063	38153987
LX	15.541	PMZ_0003883	scaffold_233	190922	192324	-		chr13	38164658	38161992
LX	15.541	PMZ_0003897	scaffold_233	345955	348602	+		chr14	24610531	24610103
LX	15.541	PMZ_0003879	scaffold_233	150793	156678	+		chr16	20329724	20328541
LX	15.541	PMZ_0003897	scaffold_233	345955	348602	+		chr16	85832892	85832677
LX	15.541	PMZ_0003875	scaffold_233	102746	113060	+		chr19	35579107	35585270
LX	15.541	PMZ_0003892	scaffold_233	274932	280125	-		chr3	113442938	113442258
LX	15.541	PMZ_0003890	scaffold_233	254288	260476	+		chr4	106613309	106613133
LX	15.541	PMZ_0003883	scaffold_233	190922	192324	-		chr5	135382032	135382671
LX	15.541	PMZ_0003884	scaffold_233	199531	221608	-		chr5	135369453	135369551
LX	15.541	PMZ_0003903	scaffold_233	479692	487531	-		chrX	64141852	64137666
LX	18.613	PMZ_0016408	scaffold_3353	8426	11922	+		chr7	100817938	100815363
LX	22.539	PMZ_0019654	scaffold_6857	582	7657	+		chr11	118960391	118963248
LX	22.539	PMZ_0013320	scaffold_1505	5517	10223	+		chr20	43108952	43118056
LX	22.539	PMZ_0003352	scaffold_630	3535	17651	+		chr6	30709483	30697796
LXI	17.577	PMZ_0004323	scaffold_171	191364	202672	+		chr6	145069381	145073094
LXI	17.577	PMZ_0004325	scaffold_171	238071	258654	+		chr6	145103072	145124277
LXI	17.577	PMZ_0004328	scaffold_171	453108	456043	-		chr6	159688805	159692471
LXI	17.577	PMZ_0004322	scaffold_171	122154	156910	+		chrX	31645990	31645775
LXI	17.577	PMZ_0004326	scaffold_171	259554	288281	+		chrX	31165637	31165380
LXI	22.055	PMZ_0002614	scaffold_25041	682542	709121	-		chr1	23376879	23406183
LXI	22.055	PMZ_0007683	scaffold_25050	74975	111385	+		chr11	110135593	110102597
LXI	22.055	PMZ_0002607	scaffold_25041	385381	390241	-		chr3	99568998	99567262
LXI	22.055	PMZ_0002611	scaffold_25041	505010	527064	+		chr3	99886581	99895259
LXI	22.055	PMZ_0012922	scaffold_1279	31910	64450	+		chr6	144744688	144750835
LXI	22.055	PMZ_0015189	scaffold_2459	31876	38753	-		chr6	75994318	75965833
LXI	22.055	PMZ_0002608	scaffold_25041	429180	444449	-		chr6	76063433	76063257
LXI	22.055	PMZ_0002612	scaffold_25041	663302	673549	+		chr6	149340269	149342625
LXI	22.055	PMZ_0002604	scaffold_25041	6851	105325	-		chr6	144757074	144768911
LXI	22.055	PMZ_0007685	scaffold_25050	212413	230293	+		chr9	21334789	21333227
LXI	22.055	PMZ_0015187	scaffold_2459	145	13667	+		chrX	17739612	17742552
LXI	22.055	PMZ_0007685	scaffold_25050	212413	230293	+		chrX	117054342	117033081
LXI	22.055	PMZ_0007683	scaffold_25050	74975	111385	+		chrX	64947676	64959752
LXI	24.158	PMZ_0015284	scaffold_2495	27256	35441	+		chr21	34958433	34951689
LXI	24.158	PMZ_0013713	scaffold_1634	36428	56067	-		chr4	80329018	80327768
LXI	24.158	PMZ_0013712	scaffold_1634	27025	31287	-		chr6	160113843	160103528
LXI	24.158	PMZ_0015283	scaffold_2495	6455	27062	-		chr6	44355561	44414442
LXI	24.158	PMZ_0013713	scaffold_1634	36428	56067	-		chrX	101035177	101033936
LXI	25.467	PMZ_0010912	scaffold_1108	29413	35995	+		chr21	40762702	40768862
LXI	27.192	PMZ_0001913	scaffold_219	257504	279085	-		chr1	40319755	40310203
LXI	27.192	PMZ_0001933	scaffold_219	581093	583240	-		chr1	147380140	147380808
LXI	27.192	PMZ_0001944	scaffold_219	738291	746143	-		chr1	118609525	118609367
LXI	27.192	PMZ_0001929	scaffold_219	543136	543781	+		chr13	25021312	25020822
LXI	27.192	PMZ_0001933	scaffold_219	581093	583240	-		chr13	20717370	20716717
LXI	27.192	PMZ_0001934	scaffold_219	581601	589401	+		chr13	20717125	20717361
LXI	27.192	PMZ_0001935	scaffold_219	608997	611070	-		chr13	20797619	20797014
LXI	27.192	PMZ_0001937	scaffold_219	677560	698401	-		chr13	21013896	20987419
LXI	27.192	PMZ_0001939	scaffold_219	713001	713807	-		chr13	20797619	20796963
LXI	27.192	PMZ_0001948	scaffold_219	770267	784262	-		chr3	121973112	122003468
LXI	27.192	PMZ_0001918	scaffold_219	401280	406308	+		chr6	74502357	74519897
LXI	27.192	PMZ_0001922	scaffold_219	448901	454279	+		chr6	74512942	74516777
LXI	27.192	PMZ_0001923	scaffold_219	461545	466387	+		chr6	74519754	74530292
LXI	27.192	PMZ_0001921	scaffold_219	432661	448680	+		chr7	9766125	9766931
LXI	27.192	PMZ_0001935	scaffold_219	608997	611070	-		chrX	70443558	70444160
LXI	27.192	PMZ_0001939	scaffold_219	713001	713807	-		chrX	70443558	70444196
LXI	28.916	PMZ_0004196	scaffold_131	171006	212482	-		chr11	108160329	108236232
LXI	28.916	PMZ_0004199	scaffold_131	330729	347131	-		chr11	108151749	108155200
LXI	28.916	PMZ_0004195	scaffold_131	136727	155180	-		chr21	45457695	45506852
LXI	28.916	PMZ_0004197	scaffold_131	297167	313255	+		chr21	45168861	45175941
LXI	28.916	PMZ_0004193	scaffold_131	68092	128630	+		chr21	45387754	45402255
LXI	28.916	PMZ_0004200	scaffold_131	493777	495672	-		chr3	119373459	119367315
LXI	28.916	PMZ_0004198	scaffold_131	317045	323456	-		chr6	105581353	105563574
LXI	28.916	PMZ_0004200	scaffold_131	493777	495672	-		chr6	105607693	105606432
LXII	0	PMZ_0013341	scaffold_1471	3842	47874	-		chr15	91434784	91436410
LXII	7.155	PMZ_0002947	scaffold_831	285564	294814	+		chr1	120539836	120529569
LXII	7.155	PMZ_0002938	scaffold_831	29425	51505	-		chr1	173802505	173826834
LXII	7.155	PMZ_0002952	scaffold_831	471463	491663	+		chr1	64011578	64036817
LXII	7.155	PMZ_0002954	scaffold_831	529965	554552	-		chr10	17730020	17747692
LXII	7.155	PMZ_0002942	scaffold_831	146750	153408	+		chr11	63884529	63884780
LXII	7.155	PMZ_0002942	scaffold_831	146750	153408	+		chr14	86088573	86088833
LXII	7.155	PMZ_0002950	scaffold_831	355138	362519	+		chr15	28508316	28491892
LXII	7.155	PMZ_0002942	scaffold_831	146750	153408	+		chr17	29622899	29622624
LXII	7.155	PMZ_0002946	scaffold_831	273351	280652	+		chr19	1041349	1041981
LXII	7.155	PMZ_0002947	scaffold_831	285564	294814	+		chr19	15302987	15302554
LXII	7.155	PMZ_0002941	scaffold_831	124453	144669	+		chr6	44922345	44922229
LXII	7.155	PMZ_0002944	scaffold_831	247800	259543	+		chr9	139418430	139418170
LXII	7.155	PMZ_0002951	scaffold_831	418464	419456	+		chrX	77529189	77528281
LXII	10.605	PMZ_0017240	scaffold_4010	1158	16858	+		chr11	114401387	114400896
LXII	17.76	PMZ_0014871	scaffold_3777	34219	43471	+		chr17	48183250	48185596
LXII	17.76	PMZ_0014871	scaffold_3777	34219	43471	+		chr2	173429232	173433545
LXII	28.917	PMZ_0014194	scaffold_2338	37545	46859	-		chr2	196866581	196851801
LXII	28.917	PMZ_0013931	scaffold_1831	2837	15819	-		chr3	186295497	186303194
LXII	30.642	PMZ_0009766	scaffold_329	122195	137815	+		chr12	48272905	48238541
LXII	30.642	PMZ_0008492	scaffold_407	31145	38931	-		chr12	48393897	48393676
LXII	30.642	PMZ_0014960	scaffold_2446	1180	8820	-		chr17	38416784	38416912
LXII	30.642	PMZ_0008492	scaffold_407	31145	38931	-		chr17	48277300	48277124
LXII	30.642	PMZ_0008493	scaffold_407	164188	186823	+		chr2	188245515	188223790
LXII	30.642	PMZ_0008494	scaffold_407	188976	189392	+		chr2	188217059	188216841
LXII	30.642	PMZ_0008494	scaffold_407	188976	189392	+		chr7	93065485	93065264
LXIII	0	PMZ_0009026	scaffold_10368	169777	187290	-		chr1	100573124	100572472
LXIII	0	PMZ_0014398	scaffold_2630	23460	28208	-		chr5	39393529	39390549
LXIII	0	PMZ_0009025	scaffold_10368	158804	168089	-		chr7	48964437	48964676
LXIII	0	PMZ_0014396	scaffold_2630	54	15298	+		chr7	48886462	48886127
LXIII	11.331	PMZ_0014268	scaffold_2391	11542	34130	-		chr12	65632300	65640027
LXIII	11.331	PMZ_0014267	scaffold_2391	2502	10558	+		chr12	122968116	122967185
LXIII	11.331	PMZ_0014269	scaffold_2391	43027	49908	+		chr12	65514337	65514194
LXIII	11.331	PMZ_0014614	scaffold_2099	130	27275	-		chr18	54339747	54363693
LXIII	11.331	PMZ_0004949	scaffold_2524	175848	252887	+		chr19	17759459	17740058
LXIII	11.331	PMZ_0004948	scaffold_2524	76981	83548	+		chr19	17780494	17780366
LXIII	11.331	PMZ_0019302	scaffold_6474	6335	15639	-		chr19	13049947	13054440
LXIII	11.331	PMZ_0004946	scaffold_2524	14354	19645	-		chr22	44258220	44237685
LXIII	11.331	PMZ_0015761	scaffold_3276	28171	34863	-		chr5	113829116	113831735
LXIII	11.331	PMZ_0014661	scaffold_6660	9256	13335	+		chr5	54168371	54165779
LXIII	11.331	PMZ_0004950	scaffold_2524	381983	403856	+		chr9	35399634	35404027
LXIII	11.331	PMZ_0004948	scaffold_2524	76981	83548	+		chr9	35237700	35237819
LXIII	14.781	PMZ_0001497	scaffold_86	973329	978011	-		chr1	160012001	160011324
LXIII	14.781	PMZ_0012827	scaffold_1978	2902	21466	+		chr11	67208700	67206232
LXIII	14.781	PMZ_0001490	scaffold_86	569774	575096	+		chr11	66101603	66100999
LXIII	14.781	PMZ_0001496	scaffold_86	945898	977943	+		chr11	59376205	59376005
LXIII	14.781	PMZ_0012827	scaffold_1978	2902	21466	+		chr12	109051184	109042444
LXIII	14.781	PMZ_0012828	scaffold_1978	29044	31467	-		chr12	113831808	113830827
LXIII	14.781	PMZ_0001494	scaffold_86	863519	863792	+		chr14	30135418	30135278
LXIII	14.781	PMZ_0012827	scaffold_1978	2902	21466	+		chr17	27944622	27942753
LXIII	14.781	PMZ_0001473	scaffold_86	188192	196874	-		chr19	47768030	47770050
LXIII	14.781	PMZ_0001482	scaffold_86	438442	460305	-		chr19	39412304	39406273
LXIII	14.781	PMZ_0001483	scaffold_86	463842	471655	+		chr19	48006749	47991548
LXIII	14.781	PMZ_0001493	scaffold_86	843003	861156	+		chr19	47219549	47217139
LXIII	14.781	PMZ_0001494	scaffold_86	863519	863792	+		chr19	47214299	47214162
LXIII	14.781	PMZ_0001494	scaffold_86	863519	863792	+		chr2	37518137	37518009
LXIII	14.781	PMZ_0001491	scaffold_86	575664	591156	-		chr20	20030078	20016899
LXIII	14.781	PMZ_0001492	scaffold_86	708949	710563	+		chr20	14308041	14306206
LXIII	14.781	PMZ_0001497	scaffold_86	973329	978011	-		chr21	39671502	39672182
LXIII	14.781	PMZ_0001475	scaffold_86	214134	217289	+		chr22	35796432	35802647
LXIII	14.781	PMZ_0001476	scaffold_86	329794	340112	+		chr22	35804399	35820245
LXIII	14.781	PMZ_0001487	scaffold_86	518265	519371	-		chr5	75914288	75913443
LXIII	14.781	PMZ_0001486	scaffold_86	499549	500568	-		chrX	1585424	1584522
LXIII	14.781	PMZ_0001487	scaffold_86	518265	519371	-		chrX	1585424	1584522
LXIII	25.386	PMZ_0009482	scaffold_6128	8273	12533	-		chr14	55609324	55611980
LXIII	25.386	PMZ_0007528	scaffold_974	88736	92327	+		chr16	81478985	81479149
LXIII	25.386	PMZ_0009482	scaffold_6128	8273	12533	-		chr17	20354958	20353295
LXIII	25.386	PMZ_0010559	scaffold_656	77721	95377	-		chrX	107169338	107170204
LXIII	25.386	PMZ_0007526	scaffold_974	59910	62889	-		chrX	107169338	107170195
LXIV	0	PMZ_0008252	scaffold_882	53663	55603	-		chr20	23066586	23066140
LXIV	3.736	PMZ_0005098	scaffold_216	64731	98955	-		chr11	68582942	68530023
LXIV	3.736	PMZ_0014776	scaffold_2197	6109	15406	-		chr12	1741888	1755415
LXIV	3.736	PMZ_0005106	scaffold_216	386538	403728	+		chr19	49488835	49472800
LXIV	3.736	PMZ_0005103	scaffold_216	216317	221380	+		chr22	18354711	18354589
LXIV	3.736	PMZ_0005098	scaffold_216	64731	98955	-		chr22	51016344	51007999
LXIV	3.736	PMZ_0011633	scaffold_871	37295	39604	-		chr22	17589220	17589990
LXIV	3.736	PMZ_0011631	scaffold_871	7062	11590	-		chr22	17589226	17589873
LXIV	3.736	PMZ_0014776	scaffold_2197	6109	15406	-		chr3	55513525	55504123
LXIV	3.736	PMZ_0011630	scaffold_871	1030	9501	+		chr3	53910102	53902749
LXIV	3.736	PMZ_0010229	scaffold_1164	119680	128029	-		chr9	95483043	95481271
LXIV	14.893	PMZ_0009003	scaffold_2111	19993	20752	+		chr1	60377414	60375483
LXIV	14.893	PMZ_0001089	scaffold_926	323549	333468	+		chr1	178410681	178412364
LXIV	14.893	PMZ_0001091	scaffold_926	362491	389291	+		chr1	178421549	178442371
LXIV	14.893	PMZ_0009003	scaffold_2111	19993	20752	+		chr10	96707559	96709014
LXIV	14.893	PMZ_0009003	scaffold_2111	19993	20752	+		chr19	41512851	41515273
LXIV	14.893	PMZ_0001101	scaffold_926	967301	976103	+		chr19	17628516	17631857
LXIV	14.893	PMZ_0020496	scaffold_8209	5195	12650	-		chr3	14518710	14523337
LXIV	14.893	PMZ_0001102	scaffold_926	1105715	1112178	+		chr3	48646768	48637913
LXIV	14.893	PMZ_0009000	scaffold_2111	2340	11567	+		chr7	117250621	117251861
LXIV	14.893	PMZ_0008999	scaffold_2111	247	2322	+		chr7	117243596	117243814
LXIV	14.893	PMZ_0001102	scaffold_926	1105715	1112178	+		chr7	102940559	102952177
LXIV	14.893	PMZ_0001089	scaffold_926	323549	333468	+		chr9	124521174	124522718
LXIV	14.893	PMZ_0020496	scaffold_8209	5195	12650	-		chrX	152959582	152960341
LXIV	21.895	PMZ_0010990	scaffold_15527	101852	109150	+		chr3	49851193	49850682
LXIV	21.895	PMZ_0010988	scaffold_15527	25703	55479	-		chr4	90034138	90035046
LXIV	21.895	PMZ_0010990	scaffold_15527	101852	109150	+		chrX	47058609	47059022
LXIV	29.05	PMZ_0019439	scaffold_6530	1838	12527	+		chr3	52977615	52960050
LXIX	0	PMZ_0013135	scaffold_1457	32139	38380	+		chr17	901991	904325
LXIX	0	PMZ_0013136	scaffold_1457	43873	62208	-		chr17	916019	910402
LXIX	0	PMZ_0013134	scaffold_1457	3763	20721	-		chr22	24717477	24730540
LXIX	0	PMZ_0013136	scaffold_1457	43873	62208	-		chr22	23652529	23657694
LXIX	0	PMZ_0013790	scaffold_1697	37589	55638	+		chr22	23603155	23603736
LXIX	0	PMZ_0015905	scaffold_2958	19013	28541	+		chr22	19165721	19163646
LXIX	8.752	PMZ_0020179	scaffold_7781	1312	14161	+		chr12	122243705	122246205
LXIX	8.769	PMZ_0015138	scaffold_3757	2942	21533	+		chr1	115222328	115215741
LXIX	8.769	PMZ_0015138	scaffold_3757	2942	21533	+		chr11	10514887	10527404
LXIX	8.769	PMZ_0015139	scaffold_3757	29886	40129	-		chr17	5264605	5286515
LXIX	14.049	PMZ_0009922	scaffold_4486	153079	160991	+		chr7	72988814	72988267
LXIX	14.912	PMZ_0005927	scaffold_1253	34263	41794	-		chr12	123343970	123345364
LXIX	14.912	PMZ_0005926	scaffold_1253	4468	22026	+		chr12	121891024	121877658
LXIX	14.912	PMZ_0005926	scaffold_1253	4468	22026	+		chr16	30937157	30958536
LXIX	14.912	PMZ_0005928	scaffold_1253	179668	185945	+		chr22	19435071	19434889
LXIX	14.912	PMZ_0005930	scaffold_1253	322201	334544	-		chr8	37964560	37996583
LXIX	15.774	PMZ_0009302	scaffold_4679	9018	21357	+		chr17	56393495	56384153
LXIX	22.707	PMZ_0008198	scaffold_2167	190949	196213	-		chr16	30718627	30720986
LXIX	22.707	PMZ_0008192	scaffold_2167	17578	24164	-		chr17	15973689	15971200
LXIX	22.707	PMZ_0008191	scaffold_2167	18	8053	-		chr17	15968985	15968182
LXIX	22.707	PMZ_0008196	scaffold_2167	44549	49546	-		chr17	16022797	16021196
LXIX	22.799	PMZ_0008805	scaffold_778	176579	179911	+		chr12	131593275	131593406
LXIX	22.799	PMZ_0008797	scaffold_778	5818	13112	-		chr12	123679139	123678921
LXIX	22.799	PMZ_0008796	scaffold_778	1721	5364	+		chr17	6544403	6546336
LXIX	22.799	PMZ_0008802	scaffold_778	51706	57451	+		chr17	16253342	16246134
LXIX	22.799	PMZ_0008808	scaffold_778	191134	195973	-		chr3	157293819	157296250
LXIX	22.799	PMZ_0008805	scaffold_778	176579	179911	+		chr9	127230798	127231640
LXIX	26.249	PMZ_0003262	scaffold_3364	2692	54556	-		chr12	124311198	124356161
LXIX	26.249	PMZ_0003265	scaffold_3364	541032	544532	+		chr16	3019706	3019843
LXIX	26.249	PMZ_0003268	scaffold_3364	576742	588677	-		chr16	3025819	3024336
LXIX	26.249	PMZ_0003263	scaffold_3364	87322	91714	+		chr17	34851069	34851239
LXIX	26.294	PMZ_0006699	scaffold_221	195235	205949	-		chr12	133394088	133393705
LXV	11.05	PMZ_0000793	scaffold_87	1116394	1167331	+		chr1	89528917	89525002
LXV	11.05	PMZ_0000799	scaffold_87	1464305	1467649	-		chr1	222849561	222846653
LXV	11.05	PMZ_0000800	scaffold_87	1470949	1484337	-		chr1	78277493	78277236
LXV	11.05	PMZ_0000763	scaffold_87	525980	532372	+		chr1	171755018	171755251
LXV	11.05	PMZ_0000745	scaffold_87	152026	163149	+		chr11	36297803	36296191
LXV	11.05	PMZ_0000749	scaffold_87	274397	283345	+		chr11	4411606	4411229
LXV	11.05	PMZ_0000801	scaffold_87	1482515	1490061	+		chr14	39901165	39901046
LXV	11.05	PMZ_0000774	scaffold_87	651905	653443	+		chr14	57072291	57076009
LXV	11.05	PMZ_0000784	scaffold_87	927758	939408	-		chr14	57271049	57268456
LXV	11.05	PMZ_0000777	scaffold_87	721351	727105	-		chr17	39921063	39920965
LXV	11.05	PMZ_0000744	scaffold_87	81538	109529	-		chr17	78309963	78322122
LXV	11.05	PMZ_0000740	scaffold_87	2915	14143	+		chr19	45923685	45916923
LXV	11.05	PMZ_0000799	scaffold_87	1464305	1467649	-		chr2	11448588	11448860
LXV	11.05	PMZ_0000757	scaffold_87	393351	414429	-		chr2	162364189	162361386
LXV	11.05	PMZ_0000760	scaffold_87	460779	487975	-		chr21	33706645	33706415
LXV	11.05	PMZ_0000767	scaffold_87	548446	556330	-		chr21	33750841	33740709
LXV	11.05	PMZ_0000748	scaffold_87	239150	246377	+		chr3	52233252	52238932
LXV	11.05	PMZ_0000777	scaffold_87	721351	727105	-		chr3	41274837	41274944
LXV	11.05	PMZ_0000778	scaffold_87	729737	752968	-		chr3	41266025	41268758
LXV	11.05	PMZ_0000800	scaffold_87	1470949	1484337	-		chr4	159198883	159199140
LXV	11.05	PMZ_0000773	scaffold_87	637078	638454	-		chr4	154600932	154601240
LXV	11.05	PMZ_0000762	scaffold_87	502507	525593	-		chr6	152477235	152461148
LXV	11.05	PMZ_0000752	scaffold_87	323478	324231	+		chr8	37756917	37756594
LXV	21.783	PMZ_0007227	scaffold_5038	126627	136812	+		chr11	119549425	119545873
LXV	21.783	PMZ_0007224	scaffold_5038	64057	81080	+		chr11	119549419	119547817
LXVI	7.774	PMZ_0019309	scaffold_8784	373	15991	-		chr15	79327551	79307668
LXVI	7.774	PMZ_0019309	scaffold_8784	373	15991	-		chr5	80369018	80382783
LXVI	8.83	PMZ_0017003	scaffold_3764	4087	28917	+		chr7	132959717	132990774
LXVI	9.515	PMZ_0006435	scaffold_273	252188	269244	-		chr1	150528632	150529272
LXVI	9.515	PMZ_0006434	scaffold_273	127912	139101	-		chr15	72040757	72069686
LXVI	9.515	PMZ_0006435	scaffold_273	252188	269244	-		chr15	72020887	72023546
LXVI	9.515	PMZ_0006430	scaffold_273	32069	39115	+		chr15	30655020	30654502
LXVI	9.515	PMZ_0006429	scaffold_273	7294	19181	+		chr15	30665379	30663290
LXVI	9.515	PMZ_0006431	scaffold_273	40689	59501	-		chr2	85023429	85046529
LXVI	12.118	PMZ_0014152	scaffold_2346	18424	26556	+		chr15	81614904	81605615
LXVI	12.981	PMZ_0004864	scaffold_204	183047	190287	+		chr1	150390083	150390196
LXVI	12.981	PMZ_0004866	scaffold_204	218185	223364	+		chr1	52498944	52498378
LXVI	12.981	PMZ_0004862	scaffold_204	155128	168716	-		chr15	72554050	72534241
LXVI	12.981	PMZ_0004863	scaffold_204	173513	174906	-		chr15	72557816	72557420
LXVI	12.981	PMZ_0004870	scaffold_204	291842	294270	-		chr15	49611809	49620353
LXVI	12.981	PMZ_0004873	scaffold_204	370214	377572	+		chr17	60216583	60215384
LXVI	12.981	PMZ_0004869	scaffold_204	259883	271060	-		chr19	640007	643598
LXVI	12.981	PMZ_0004873	scaffold_204	370214	377572	+		chr19	622358	621058
LXVI	12.981	PMZ_0017128	scaffold_3887	3503	4702	-		chr2	128408454	128409245
LXVI	12.981	PMZ_0004861	scaffold_204	145144	153640	+		chr5	76249856	76254672
LXVI	12.981	PMZ_0004865	scaffold_204	200651	216036	+		chr5	33448644	33467810
LXVI	12.981	PMZ_0017128	scaffold_3887	3503	4702	-		chrX	77529216	77528326
LXVI	18.283	PMZ_0010292	scaffold_3985	16531	23476	-		chr15	66643943	66641635
LXVI	18.283	PMZ_0010290	scaffold_3985	42	6149	+		chr15	66585944	66604238
LXVI	18.283	PMZ_0010291	scaffold_3985	6929	16651	+		chr15	66606377	66625632
LXVI	18.283	PMZ_0010292	scaffold_3985	16531	23476	-		chr16	58126657	58126424
LXVI	18.283	PMZ_0021749	scaffold_11010	107	8910	+		chr19	2435142	2431781
LXVI	18.283	PMZ_0010294	scaffold_3985	145322	150603	+		chr19	1978651	1979250
LXVI	18.283	PMZ_0021749	scaffold_11010	107	8910	+		chr5	126145872	126161799
LXVI	18.283	PMZ_0010294	scaffold_3985	145322	150603	+		chr5	122909137	122923850
LXVI	18.283	PMZ_0010292	scaffold_3985	16531	23476	-		chrX	53483778	53483320
LXVI	20.008	PMZ_0008869	scaffold_2057	162705	188039	-		chr10	79492022	79494529
LXVI	20.008	PMZ_0008868	scaffold_2057	151397	161511	+		chr18	57022652	57022542
LXVI	20.008	PMZ_0008869	scaffold_2057	162705	188039	-		chr22	17340990	17338507
LXVI	21.733	PMZ_0019526	scaffold_6759	117	8778	-		chr15	89872407	89868758
LXVI	28.632	PMZ_0018777	scaffold_5633	9101	16549	+		chr5	159476520	159476678
LXVII	3.45	PMZ_0004506	scaffold_3684	12684	27113	-		chr11	101353869	101342007
LXVII	3.45	PMZ_0004507	scaffold_3684	33425	41355	-		chr11	101375489	101362284
LXVII	3.45	PMZ_0020313	scaffold_7936	335	11433	-		chr11	6244480	6239067
LXVII	3.45	PMZ_0004513	scaffold_3684	403852	419745	+		chr22	46655241	46654312
LXVII	3.45	PMZ_0004506	scaffold_3684	12684	27113	-		chr4	122833221	122824100
LXVII	3.45	PMZ_0004507	scaffold_3684	33425	41355	-		chr4	122854160	122846170
LXVII	3.45	PMZ_0004506	scaffold_3684	12684	27113	-		chr5	135602097	135561722
LXVII	6.899	PMZ_0018002	scaffold_6926	8104	23454	+		chr13	25895058	25905584
LXVII	28.363	PMZ_0011871	scaffold_24814	904	21284	+		chr13	30107120	30097408
LXVII	28.363	PMZ_0011872	scaffold_24814	31779	83035	+		chrX	18972530	18923871
LXVIII	3.394	PMZ_0016763	scaffold_3576	885	13469	-		chr1	166927354	166925965
LXVIII	3.394	PMZ_0010120	scaffold_5829	122	6064	+		chr1	116939226	116946599
LXVIII	3.394	PMZ_0016764	scaffold_3576	23893	25128	-		chr12	123201095	123200394
LXVIII	3.394	PMZ_0019569	scaffold_6715	2062	15996	+		chr14	19720399	19719546
LXVIII	3.394	PMZ_0016764	scaffold_3576	23893	25128	-		chr19	10224485	10224838
LXVIII	3.394	PMZ_0016763	scaffold_3576	885	13469	-		chr19	35741223	35749990
LXVIII	3.394	PMZ_0010120	scaffold_5829	122	6064	+		chr19	42482218	42471384
LXVIII	3.394	PMZ_0019569	scaffold_6715	2062	15996	+		chr19	45394901	45406423
LXVIII	3.394	PMZ_0019569	scaffold_6715	2062	15996	+		chr22	16122912	16123765
LXVIII	3.394	PMZ_0020953	scaffold_9187	3226	10383	-		chr3	185237080	185236913
LXVIII	3.394	PMZ_0019568	scaffold_6715	262	1373	-		chr6	109108172	109107930
LXVIII	17.772	PMZ_0009297	scaffold_2597	144205	152510	+		chr11	111835270	111839361
LXVIII	17.772	PMZ_0009299	scaffold_2597	163310	167700	-		chr14	35038110	35037919
LXVIII	17.772	PMZ_0009299	scaffold_2597	163310	167700	-		chr19	42373151	42373829
LXVIII	19.767	PMZ_0013015	scaffold_2439	50765	58156	-		chr11	132016177	132016410
LXVIII	19.767	PMZ_0013013	scaffold_2439	24466	36591	+		chr3	101573906	101574719
LXVIII	20.071	PMZ_0011104	scaffold_812	60355	84656	+		chr10	46224319	46238912
LXVIII	20.071	PMZ_0011106	scaffold_812	99583	105061	-		chr11	121174085	121178131
LXVIII	20.071	PMZ_0011103	scaffold_812	48786	55762	-		chr19	36036642	36037949
LXX	4.295	PMZ_0012009	scaffold_1546	38748	79854	+		chr1	17086078	17084436
LXX	4.295	PMZ_0012006	scaffold_1546	5514	15468	-		chr1	183072465	183079782
LXX	4.295	PMZ_0012009	scaffold_1546	38748	79854	+		chr3	49724912	49724127
LXX	4.295	PMZ_0012006	scaffold_1546	5514	15468	-		chr9	133901674	133911712
LXX	12.606	PMZ_0016575	scaffold_3515	5284	11437	-		chr1	203452544	203453140
LXX	12.606	PMZ_0016575	scaffold_3515	5284	11437	-		chr12	91449920	91449318
LXX	12.606	PMZ_0007284	scaffold_367	213368	229258	+		chr12	96912712	96912828
LXX	12.606	PMZ_0007285	scaffold_367	231473	241592	+		chr12	96974719	96974886
LXX	12.606	PMZ_0017033	scaffold_3862	17263	27958	+		chr2	95537625	95537822
LXX	12.606	PMZ_0007283	scaffold_367	187764	188141	-		chr3	57994292	57994582
LXX	12.606	PMZ_0007280	scaffold_367	34728	40389	-		chr3	49059771	49060409
LXX	12.606	PMZ_0007282	scaffold_367	65456	68102	+		chr3	3886563	3887879
LXX	12.606	PMZ_0011897	scaffold_919	8818	27075	-		chr3	13522744	13546117
LXX	12.606	PMZ_0007283	scaffold_367	187764	188141	-		chr7	128470749	128471042
LXX	12.606	PMZ_0007277	scaffold_367	383	6540	-		chr7	130135216	130138117
LXX	12.606	PMZ_0007278	scaffold_367	8901	23182	+		chr7	130042642	130040573
LXX	12.606	PMZ_0011898	scaffold_919	30414	47758	-		chr7	108143098	108112878
LXX	12.606	PMZ_0011899	scaffold_919	57497	67167	+		chr7	140058654	140048439
LXX	12.606	PMZ_0011900	scaffold_919	80822	81133	+		chr9	96214417	96214656
LXX	12.606	PMZ_0007283	scaffold_367	187764	188141	-		chrX	153599538	153599242
LXX	12.606	PMZ_0011896	scaffold_919	631	6382	-		chrX	53449549	53440179
LXX	21.634	PMZ_0013360	scaffold_4562	22785	30508	-		chr12	6833847	6839682
LXX	21.634	PMZ_0013360	scaffold_4562	22785	30508	-		chr2	232653290	232663677
LXX	25.084	PMZ_0018904	scaffold_5811	14312	15353	+		chr1	110125060	110125188
LXX	25.084	PMZ_0018904	scaffold_5811	14312	15353	+		chr3	50293625	50293753
LXX	25.084	PMZ_0018904	scaffold_5811	14312	15353	+		chr7	79833021	79833170
LXX	25.084	PMZ_0018903	scaffold_5811	9450	13435	+		chr7	79818248	79818553
LXXI	0	PMZ_0017877	scaffold_4854	21226	23627	-		chr12	4854596	4872565
LXXI	0.147	PMZ_0016054	scaffold_3676	81	9062	+		chr12	88454771	88453693
LXXI	11.744	PMZ_0020203	scaffold_7686	1178	7475	-		chr12	25302723	25297503
LXXI	11.744	PMZ_0020942	scaffold_9095	811	8598	-		chr12	4853685	4873213
LXXII	3.394	PMZ_0004554	scaffold_45	298982	333875	-		chr1	206646571	206651671
LXXII	3.394	PMZ_0020077	scaffold_7457	124	1962	-		chr1	109742474	109742605
LXXII	3.394	PMZ_0020078	scaffold_7457	3010	14189	-		chr1	109716096	109740275
LXXII	3.394	PMZ_0004549	scaffold_45	188133	209081	+		chr12	65141653	65113801
LXXII	3.394	PMZ_0004555	scaffold_45	351945	364687	+		chr12	104659105	104659614
LXXII	3.394	PMZ_0004555	scaffold_45	351945	364687	+		chr19	17972099	17974069
LXXII	3.394	PMZ_0004555	scaffold_45	351945	364687	+		chr2	47918367	47917858
LXXII	3.394	PMZ_0014652	scaffold_3406	25115	33104	+		chr3	50396386	50392906
LXXII	3.394	PMZ_0004550	scaffold_45	222699	229223	-		chr3	50369281	50368033
LXXII	3.394	PMZ_0004552	scaffold_45	274743	290875	-		chr3	50380655	50379004
LXXII	3.394	PMZ_0004557	scaffold_45	445913	454662	+		chr3	50357896	50355623
LXXII	3.394	PMZ_0004556	scaffold_45	374233	405492	-		chr7	123349277	123329103
LXXII	3.394	PMZ_0004557	scaffold_45	445913	454662	+		chr7	123508430	123517152
LXXII	3.394	PMZ_0020077	scaffold_7457	124	1962	-		chr7	86526947	86526819
LXXII	3.394	PMZ_0020078	scaffold_7457	3010	14189	-		chr7	86568286	86539129
LXXII	23.667	PMZ_0015505	scaffold_5701	21164	33968	+		chr7	106508100	106545796
LXXIII	0	PMZ_0013630	scaffold_3107	55520	56347	+		chr1	222721263	222721066
LXXIII	0	PMZ_0013629	scaffold_3107	17714	32979	-		chr11	65638130	65637590
LXXIII	0	PMZ_0014134	scaffold_3047	31541	41967	+		chr14	68191812	68196095
LXXIII	0	PMZ_0014133	scaffold_3047	5473	31812	-		chr14	99880274	99865298
LXXIII	0	PMZ_0013630	scaffold_3107	55520	56347	+		chr14	100111602	100111799
LXXIII	0	PMZ_0013629	scaffold_3107	17714	32979	-		chr2	56108870	56104879
LXXIII	0	PMZ_0013629	scaffold_3107	17714	32979	-		chr3	13670591	13671447
LXXIII	0	PMZ_0013628	scaffold_3107	6406	8466	-		chr3	13671316	13672977
LXXIII	0	PMZ_0013629	scaffold_3107	17714	32979	-		chr9	133303744	133306875
LXXIII	4.312	PMZ_0017414	scaffold_4104	1	26915	-		chr14	31642796	31602776
LXXIII	5.174	PMZ_0023465	scaffold_17454	406	3896	-		chr16	23598622	23593608
LXXIII	8.424	PMZ_0014381	scaffold_2443	7660	16770	+		chr2	217001862	217012997
LXXIII	11.691	PMZ_0021293	scaffold_9968	2	343	+		chr14	99640748	99640539
LXXIII	11.691	PMZ_0021293	scaffold_9968	2	343	+		chr2	60687784	60687569
LXXIII	14.958	PMZ_0006675	scaffold_6835	205268	227184	+		chr1	24105045	24113863
LXXIII	14.958	PMZ_0006671	scaffold_6835	42884	44566	-		chr1	240070878	240072437
LXXIII	14.958	PMZ_0006674	scaffold_6835	86875	93198	-		chr1	236881155	236882318
LXXIII	14.958	PMZ_0006676	scaffold_6835	264841	265716	-		chr10	90966995	90966261
LXXIII	14.958	PMZ_0006671	scaffold_6835	42884	44566	-		chr11	62678473	62677259
LXXIII	14.958	PMZ_0006672	scaffold_6835	47298	61818	-		chr11	66321539	66328844
LXXIII	14.958	PMZ_0006672	scaffold_6835	47298	61818	-		chr14	69378936	69349172
LXXIII	14.958	PMZ_0006673	scaffold_6835	81439	85059	-		chr14	93299464	93305776
LXXIII	14.958	PMZ_0006674	scaffold_6835	86875	93198	-		chr14	69392413	69387700
LXXIII	14.958	PMZ_0006668	scaffold_6835	2186	19993	+		chr15	33194243	33192183
LXXIII	14.958	PMZ_0006670	scaffold_6835	29773	33666	+		chr15	33091123	33091007
LXXIII	14.958	PMZ_0006671	scaffold_6835	42884	44566	-		chr15	34355039	34356460
LXXIII	14.958	PMZ_0006674	scaffold_6835	86875	93198	-		chr19	39191207	39191781
LXXIII	21.698	PMZ_0009760	scaffold_804	147328	169822	+		chr11	65381134	65380679
LXXIII	21.698	PMZ_0009760	scaffold_804	147328	169822	+		chr14	71275720	71267574
LXXIII	21.698	PMZ_0009759	scaffold_804	131123	141472	+		chr15	43010632	43011766
LXXIII	21.698	PMZ_0009754	scaffold_804	195	11100	+		chr4	6611598	6621746
LXXIII	21.698	PMZ_0009755	scaffold_804	61178	73769	+		chr5	63986478	63986633
LXXIV	3.45	PMZ_0005284	scaffold_182	376592	379836	+		chr1	233091353	233105870
LXXIV	3.45	PMZ_0005278	scaffold_182	299431	321031	+		chr11	65638130	65634392
LXXIV	3.45	PMZ_0005279	scaffold_182	324095	341859	-		chr11	65628273	65633520
LXXIV	3.45	PMZ_0005278	scaffold_182	299431	321031	+		chr14	92361417	92336571
LXXIV	3.45	PMZ_0005273	scaffold_182	10170	34197	-		chr19	38800245	38796031
LXXIV	3.45	PMZ_0011652	scaffold_5696	81456	87886	-		chr22	50946767	50954980
LXXIV	3.45	PMZ_0005280	scaffold_182	348010	356637	-		chr7	140058534	140043212
LXXIV	3.45	PMZ_0007754	scaffold_1372	286	21082	-		chrX	117528017	117543592
LXXIX	0	PMZ_0021943	scaffold_11556	2538	7841	+		chr2	74300672	74326564
LXXIX	0	PMZ_0021943	scaffold_11556	2538	7841	+		chr4	106162492	106193876
LXXIX	7.155	PMZ_0018870	scaffold_5763	6472	16201	-		chr4	89199525	89186144
LXXV	0	PMZ_0015606	scaffold_2762	1643	6431	-		chr12	48369238	48367193
LXXV	0	PMZ_0015606	scaffold_2762	1643	6431	-		chr2	189873779	189876497
LXXV	5.174	PMZ_0007967	scaffold_1015	200270	215510	+		chr1	3591908	3591528
LXXV	5.174	PMZ_0007966	scaffold_1015	46034	51341	-		chr1	182929087	182928341
LXXV	5.174	PMZ_0020116	scaffold_7644	440	1879	-		chr12	56487130	56487333
LXXV	5.174	PMZ_0020117	scaffold_7644	7195	12784	-		chr12	56482326	56482662
LXXV	5.174	PMZ_0020116	scaffold_7644	440	1879	-		chr2	212566857	212566687
LXXV	5.174	PMZ_0020117	scaffold_7644	7195	12784	-		chr2	212578377	212576738
LXXV	5.174	PMZ_0007967	scaffold_1015	200270	215510	+		chr3	195977154	195976843
LXXV	5.174	PMZ_0007966	scaffold_1015	46034	51341	-		chr3	32300844	32301590
LXXV	5.174	PMZ_0007966	scaffold_1015	46034	51341	-		chr5	36885719	36886467
LXXV	5.174	PMZ_0007965	scaffold_1015	20112	43684	+		chr7	33185865	33195316
LXXV	5.204	PMZ_0020186	scaffold_7806	656	11336	+		chr12	124116991	124106306
LXXV	5.233	PMZ_0008397	scaffold_1248	198578	204485	-		chr1	156264765	156263110
LXXV	5.233	PMZ_0008393	scaffold_1248	135553	143351	+		chr10	105005874	105006437
LXXV	5.233	PMZ_0008396	scaffold_1248	179508	197011	+		chr10	75532218	75535410
LXXV	5.233	PMZ_0008395	scaffold_1248	153410	167573	-		chr15	91419482	91420254
LXXV	5.233	PMZ_0008393	scaffold_1248	135553	143351	+		chr2	210880690	210884512
LXXV	12.321	PMZ_0013824	scaffold_1672	14936	49407	+		chr1	146649834	146650262
LXXV	12.321	PMZ_0012429	scaffold_1165	35421	53273	-		chr3	41266043	41278206
LXXV	13.281	PMZ_0018430	scaffold_5203	874	8870	+		chr3	122942407	122944104
LXXV	14.075	PMZ_0002182	scaffold_24883	154190	162850	-		chr1	203775383	203774749
LXXV	14.075	PMZ_0002186	scaffold_24883	373501	390474	-		chr10	28970177	28971147
LXXV	14.075	PMZ_0002187	scaffold_24883	405841	420760	-		chr10	28905076	28908532
LXXV	14.075	PMZ_0002189	scaffold_24883	685903	694754	+		chr17	41960426	41959676
LXXV	14.075	PMZ_0002190	scaffold_24883	751960	776964	+		chr17	41958221	41955178
LXXV	14.075	PMZ_0002178	scaffold_24883	39645	51138	+		chr3	122646868	122642344
LXXV	14.075	PMZ_0002181	scaffold_24883	123835	139254	-		chr5	7875373	7900168
LXXV	14.075	PMZ_0002179	scaffold_24883	70523	79446	+		chr5	9066758	9051989
LXXV	14.075	PMZ_0002189	scaffold_24883	685903	694754	+		chr7	24689231	24690307
LXXV	14.075	PMZ_0002190	scaffold_24883	751960	776964	+		chr7	24708117	24727230
LXXV	14.075	PMZ_0002182	scaffold_24883	154190	162850	-		chrX	46585253	46584597
LXXV	19.31	PMZ_0005780	scaffold_107	53352	73334	+		chr2	137814034	137814564
LXXV	19.31	PMZ_0005782	scaffold_107	94267	130357	+		chr2	137988613	137990719
LXXV	19.31	PMZ_0004264	scaffold_44	204512	361824	-		chr2	141259432	141202133
LXXV	19.31	PMZ_0005780	scaffold_107	53352	73334	+		chr7	11676541	11675762
LXXV	19.31	PMZ_0005782	scaffold_107	94267	130357	+		chr7	11521610	11513963
LXXVI	1.725	PMZ_0005342	scaffold_1728	169714	181090	-		chr10	71000402	71007350
LXXVI	1.725	PMZ_0005340	scaffold_1728	853	2688	-		chr10	101658044	101657868
LXXVI	1.725	PMZ_0007777	scaffold_3304	1197	19836	+		chr10	62671300	62652591
LXXVI	1.725	PMZ_0007782	scaffold_3304	219886	233771	+		chr10	101166600	101157310
LXXVI	1.725	PMZ_0002040	scaffold_332	38467	47921	+		chr13	96205026	96205412
LXXVI	1.725	PMZ_0002044	scaffold_332	443724	444996	+		chr13	88329198	88329353
LXXVI	1.725	PMZ_0007421	scaffold_672	32780	50790	-		chr15	40764025	40764516
LXXVI	1.725	PMZ_0012332	scaffold_1070	28195	36254	+		chr2	86756518	86732930
LXXVI	1.725	PMZ_0005342	scaffold_1728	169714	181090	-		chr2	75100971	75106058
LXXVI	1.725	PMZ_0002039	scaffold_332	580	8703	+		chr2	233394645	233400019
LXXVI	1.725	PMZ_0007420	scaffold_672	29	9457	-		chr2	91936613	91935972
LXXVI	1.725	PMZ_0005677	scaffold_2658	321037	322104	-		chr3	88040020	88040988
LXXVI	1.725	PMZ_0005340	scaffold_1728	853	2688	-		chr4	106566340	106566519
LXXVI	1.725	PMZ_0007778	scaffold_3304	162038	168046	-		chr4	57777273	57777716
LXXVI	1.725	PMZ_0007779	scaffold_3304	172698	187036	-		chr4	25253966	25260826
LXXVI	1.725	PMZ_0002047	scaffold_332	665076	665976	+		chr4	25161991	25160574
LXXVI	1.725	PMZ_0005677	scaffold_2658	321037	322104	-		chr6	78172928	78171963
LXXVI	1.725	PMZ_0012331	scaffold_1070	1095	9678	+		chr8	22865145	22874910
LXXVI	1.725	PMZ_0007777	scaffold_3304	1197	19836	+		chr8	22861948	22863659
LXXVI	11.174	PMZ_0019632	scaffold_6757	4909	10997	-		chr1	10032156	10042699
LXXVI	11.174	PMZ_0003084	scaffold_256	166281	174448	-		chr20	14307837	14307238
LXXVI	11.174	PMZ_0003089	scaffold_256	302251	302808	-		chr3	194118780	194118415
LXXVI	11.174	PMZ_0003091	scaffold_256	330668	339924	+		chr3	194118396	194117782
LXXVIII	0	PMZ_0015895	scaffold_3961	21193	25566	+		chr10	45956861	45953801
LXXVIII	0	PMZ_0015894	scaffold_3961	5129	11159	-		chr4	79860378	79841717
LXXVIII	3.45	PMZ_0011208	scaffold_685	80637	102492	+		chr10	70506916	70525839
LXXVIII	3.45	PMZ_0011207	scaffold_685	47648	78633	-		chr4	186353132	186357338
LXXX	17.177	PMZ_0006850	scaffold_1010	226102	228406	-		chr11	68170951	68177609
LXXX	17.177	PMZ_0006847	scaffold_1010	26903	38784	-		chr11	57115643	57118373
LXXX	17.177	PMZ_0000897	scaffold_34	1220305	1220649	+		chr11	119103155	119103346
LXXX	17.177	PMZ_0000898	scaffold_34	1267929	1277319	+		chr11	119142482	119145670
LXXX	17.177	PMZ_0001007	scaffold_94	14225	14575	+		chr11	114393034	114392705
LXXX	17.177	PMZ_0001028	scaffold_94	949597	959750	+		chr11	134359692	134359123
LXXX	17.177	PMZ_0006850	scaffold_1010	226102	228406	-		chr12	12318229	12315126
LXXX	17.177	PMZ_0000877	scaffold_34	108849	110073	+		chr12	4702167	4705440
LXXX	17.177	PMZ_0000887	scaffold_34	850384	853953	+		chr12	56436254	56437271
LXXX	17.177	PMZ_0000890	scaffold_34	981676	983658	-		chr12	56420726	56421733
LXXX	17.177	PMZ_0000887	scaffold_34	850384	853953	+		chr13	101192454	101192200
LXXX	17.177	PMZ_0000887	scaffold_34	850384	853953	+		chr15	64885226	64885483
LXXX	17.177	PMZ_0001032	scaffold_94	1050150	1065980	+		chr15	75819608	75801255
LXXX	17.177	PMZ_0001009	scaffold_94	234286	239152	+		chr15	27222156	27222320
LXXX	17.177	PMZ_0001010	scaffold_94	306157	309353	+		chr15	27572022	27574034
LXXX	17.177	PMZ_0000881	scaffold_34	331763	338661	-		chr17	37863242	37864786
LXXX	17.177	PMZ_0001030	scaffold_94	1022377	1031048	+		chr18	56390264	56411730
LXXX	17.177	PMZ_0000896	scaffold_34	1196772	1216165	+		chr19	45259493	45261655
LXXX	17.177	PMZ_0008432	scaffold_2705	12004	23319	+		chr2	173825850	173832173
LXXX	17.177	PMZ_0000888	scaffold_34	938174	946510	-		chr2	213886852	213872093
LXXX	17.177	PMZ_0000890	scaffold_34	981676	983658	-		chr2	213921716	213914435
LXXX	17.177	PMZ_0006366	scaffold_2014	7434	31942	-		chr20	42196306	42208701
LXXX	17.177	PMZ_0006847	scaffold_1010	26903	38784	-		chr22	21377230	21380187
LXXX	17.177	PMZ_0006851	scaffold_1010	247382	280761	-		chr4	69681738	69693267
LXXX	17.177	PMZ_0001009	scaffold_94	234286	239152	+		chr4	46099332	46099204
LXXX	17.177	PMZ_0001021	scaffold_94	639662	640205	+		chr4	46043259	46043008
LXXX	17.177	PMZ_0001009	scaffold_94	234286	239152	+		chr5	161520853	161521002
LXXX	17.177	PMZ_0001021	scaffold_94	639662	640205	+		chr5	161580081	161580371
LXXX	17.177	PMZ_0006366	scaffold_2014	7434	31942	-		chr6	134494695	134491427
LXXX	17.177	PMZ_0000888	scaffold_34	938174	946510	-		chr7	50455045	50468307
LXXX	17.177	PMZ_0000890	scaffold_34	981676	983658	-		chr7	50444341	50450407
LXXXI	0	PMZ_0020877	scaffold_9006	143	3296	+		chr1	989164	990349
LXXXI	5.361	PMZ_0008499	scaffold_2421	187965	195763	+		chr1	6155383	6158628
LXXXI	5.361	PMZ_0008498	scaffold_2421	19950	38046	+		chr1	8022846	8045111
LXXXI	5.361	PMZ_0008497	scaffold_2421	6213	13618	+		chr1	1119250	1132909
LXXXI	11.38	PMZ_0024028	scaffold_21505	55	1937	+		chr3	195615459	195613854
LXXXII	0	PMZ_0002547	scaffold_338	195677	199469	-		chr12	111801231	111800854
LXXXII	0	PMZ_0002546	scaffold_338	64388	86686	-		chr15	43552739	43531016
LXXXII	0	PMZ_0002549	scaffold_338	306131	330443	-		chr16	28837561	28841380
LXXXII	0	PMZ_0020132	scaffold_7617	1635	12634	-		chr19	50367663	50365052
LXXXII	0	PMZ_0022945	scaffold_15060	32	4122	-		chr20	36952269	36952451
LXXXII	0.177	PMZ_0019740	scaffold_24981	14396	14608	+		chr19	33355215	33355003
LXXXII	5.16	PMZ_0023026	scaffold_15392	353	5468	-		chr20	57269475	57287636
LXXXIII	0	PMZ_0013103	scaffold_3449	16852	31945	-		chr1	3410707	3409204
LXXXIII	0	PMZ_0013102	scaffold_3449	2	2958	+		chr3	168806949	168802700
LXXXIII	0	PMZ_0013103	scaffold_3449	16852	31945	-		chr5	126758365	126778814
LXXXIII	7.155	PMZ_0012740	scaffold_3026	41230	48705	+		chr1	3541982	3545164
LXXXIII	7.155	PMZ_0012739	scaffold_3026	6771	12063	-		chr1	11073785	11082285
LXXXIII	7.155	PMZ_0013443	scaffold_6697	140	10123	+		chr12	6672861	6669265
LXXXIV	0	PMZ_0019169	scaffold_6099	1216	9671	-		chr1	99753521	99764787
LXXXIV	3.45	PMZ_0007032	scaffold_1039	12389	16884	+		chr1	100154330	100154596
LXXXIV	3.45	PMZ_0014043	scaffold_1958	120	3111	-		chr1	85036409	85031591
LXXXIV	3.45	PMZ_0007035	scaffold_1039	180183	187812	+		chr11	124794951	124793626
LXXXIV	3.45	PMZ_0007036	scaffold_1039	189007	198110	+		chr12	54858946	54856956
LXXXIV	3.45	PMZ_0007040	scaffold_1039	223902	234010	-		chr2	232123711	232146846
LXXXIV	3.45	PMZ_0007043	scaffold_1039	253999	259364	-		chr2	232079541	232104757
LXXXIV	3.45	PMZ_0007044	scaffold_1039	263131	268894	-		chr5	54624527	54639286
LXXXIV	3.45	PMZ_0007032	scaffold_1039	12389	16884	+		chr9	112704965	112705177
LXXXIV	3.45	PMZ_0014044	scaffold_1958	24142	37248	-		chr9	140772515	140777336
LXXXIV	3.45	PMZ_0007039	scaffold_1039	216298	220045	+		chrX	48762561	48762172
LXXXIV	13.996	PMZ_0001901	scaffold_25	284034	288167	+		chr1	101704595	101705494
LXXXIV	13.996	PMZ_0001903	scaffold_25	328562	336610	+		chr1	54610481	54610125
LXXXIV	13.996	PMZ_0001898	scaffold_25	99884	104143	-		chr1	101490999	101479248
LXXXIV	13.996	PMZ_0002430	scaffold_48	106548	111976	+		chr1	63063337	63063678
LXXXIV	13.996	PMZ_0002431	scaffold_48	117244	128030	-		chr1	63119833	63084379
LXXXIV	13.996	PMZ_0002441	scaffold_48	336807	351856	-		chr1	44424415	44433351
LXXXIV	13.996	PMZ_0002442	scaffold_48	360981	450249	-		chr1	44415089	44423830
LXXXIV	13.996	PMZ_0002443	scaffold_48	465844	474004	+		chr1	45120884	45120240
LXXXIV	13.996	PMZ_0002428	scaffold_48	52543	57640	+		chr1	46810473	46827515
LXXXIV	13.996	PMZ_0002429	scaffold_48	58938	100116	-		chr1	63052300	62923223
LXXXIV	13.996	PMZ_0001902	scaffold_25	300501	300881	+		chr10	16911827	16911648
LXXXIV	13.996	PMZ_0002446	scaffold_48	662146	665990	-		chr10	18827106	18827258
LXXXIV	13.996	PMZ_0002449	scaffold_48	694910	715151	-		chr10	18787284	18789875
LXXXIV	13.996	PMZ_0001904	scaffold_25	346140	359038	+		chr11	803306	800762
LXXXIV	13.996	PMZ_0001905	scaffold_25	361759	371838	+		chr11	800452	799433
LXXXIV	13.996	PMZ_0002446	scaffold_48	662146	665990	-		chr17	37333791	37333651
LXXXIV	13.996	PMZ_0002448	scaffold_48	670257	678681	-		chr17	37340627	37339963
LXXXIV	13.996	PMZ_0001902	scaffold_25	300501	300881	+		chr18	70526271	70526074
LXXXIV	13.996	PMZ_0002431	scaffold_48	117244	128030	-		chr19	11363637	11352723
LXXXIV	13.996	PMZ_0002432	scaffold_48	150140	151534	+		chr19	13041515	13041237
LXXXIV	13.996	PMZ_0002433	scaffold_48	152652	157628	+		chr19	13039657	13039160
LXXXIV	13.996	PMZ_0002435	scaffold_48	239998	248770	+		chr19	13035615	13033598
LXXXIV	13.996	PMZ_0002437	scaffold_48	291819	296181	-		chr19	3496812	3491499
LXXXIV	13.996	PMZ_0001911	scaffold_25	708655	709902	+		chr2	5832968	5834176
LXXXIV	13.996	PMZ_0002444	scaffold_48	638866	640129	+		chr2	217559429	217559199
LXXXIV	13.996	PMZ_0002445	scaffold_48	646640	656000	+		chr2	217542954	217541504
LXXXIV	13.996	PMZ_0002446	scaffold_48	662146	665990	-		chr2	152698605	152698453
LXXXIV	13.996	PMZ_0002449	scaffold_48	694910	715151	-		chr2	152737436	152732939
LXXXIV	13.996	PMZ_0002426	scaffold_48	5799	36805	+		chr5	61642938	61677079
LXXXIV	13.996	PMZ_0001911	scaffold_25	708655	709902	+		chr6	21594910	21596187
LXXXIV	13.996	PMZ_0002444	scaffold_48	638866	640129	+		chr7	45960631	45960398
LXXXIV	13.996	PMZ_0001902	scaffold_25	300501	300881	+		chr8	22064819	22065025
LXXXIV	13.996	PMZ_0001901	scaffold_25	284034	288167	+		chr9	91616176	91617030
LXXXIV	13.996	PMZ_0002438	scaffold_48	297697	309967	+		chr9	27567109	27548237
LXXXIX	0	PMZ_0012603	scaffold_2260	826	6167	+		chr11	67288577	67287528
LXXXIX	0	PMZ_0014512	scaffold_3331	28632	32067	+		chr11	128710120	128709023
LXXXIX	0	PMZ_0012604	scaffold_2260	32751	57015	-		chr12	14664604	14659015
LXXXIX	0	PMZ_0012603	scaffold_2260	826	6167	+		chr12	121098046	121098637
LXXXIX	0	PMZ_0008266	scaffold_3877	14527	22201	+		chr17	72758166	72759595
LXXXIX	0	PMZ_0012734	scaffold_1724	19621	47820	+		chr19	6016282	5997062
LXXXIX	0	PMZ_0012603	scaffold_2260	826	6167	+		chr19	48543958	48542471
LXXXIX	0	PMZ_0012734	scaffold_1724	19621	47820	+		chr9	3293258	3248014
LXXXIX	4.587	PMZ_0015273	scaffold_2573	289	1454	+		chr16	683416	684054
LXXXIX	4.587	PMZ_0015272	scaffold_2573	6	10343	-		chr16	133048	135761
LXXXIX	4.587	PMZ_0015275	scaffold_2573	35213	37309	+		chr17	66518966	66519958
LXXXIX	4.587	PMZ_0015275	scaffold_2573	35213	37309	+		chr7	720294	716865
LXXXV	0	PMZ_0011403	scaffold_751	43703	81859	+		chr11	93399874	93400979
LXXXV	0	PMZ_0007570	scaffold_526	163138	169244	+		chr13	47469825	47469625
LXXXV	0	PMZ_0007571	scaffold_526	204148	207684	+		chr2	231978635	231973468
LXXXV	0	PMZ_0007570	scaffold_526	163138	169244	+		chrX	113965827	113966021
LXXXV	0	PMZ_0007574	scaffold_526	244936	246720	-		chrX	3236048	3235146
LXXXV	1.725	PMZ_0004924	scaffold_2051	186988	194669	-		chr13	45914918	45912795
LXXXV	1.725	PMZ_0004927	scaffold_2051	233718	259303	+		chr13	50306802	50276519
LXXXV	1.725	PMZ_0004927	scaffold_2051	233718	259303	+		chr3	160249347	160222743
LXXXV	6.872	PMZ_0014533	scaffold_2074	2957	4078	-		chr11	76506697	76507452
LXXXV	6.872	PMZ_0014536	scaffold_2074	38913	46276	-		chr11	74414542	74414321
LXXXV	6.872	PMZ_0016271	scaffold_3982	23337	23684	-		chr11	3220524	3220850
LXXXV	6.872	PMZ_0011011	scaffold_1193	68233	78860	+		chr13	50505274	50489202
LXXXV	6.872	PMZ_0011008	scaffold_1193	1973	8434	+		chr2	241404494	241405061
LXXXV	6.872	PMZ_0016271	scaffold_3982	23337	23684	-		chr8	143885806	143885477
LXXXV	6.872	PMZ_0011010	scaffold_1193	39380	67251	+		chrX	123184971	123229296
LXXXV	6.872	PMZ_0014536	scaffold_2074	38913	46276	-		chrX	109932029	109931838
LXXXV	12.136	PMZ_0012783	scaffold_1235	44902	51421	-		chr13	113793673	113803765
LXXXV	12.136	PMZ_0012780	scaffold_1235	5108	5869	+		chr13	52026661	52026551
LXXXV	12.136	PMZ_0012781	scaffold_1235	15928	35097	+		chr5	39719361	39719173
LXXXV	12.136	PMZ_0012780	scaffold_1235	5108	5869	+		chrX	134654918	134655028
LXXXVII	0	PMZ_0000866	scaffold_492	1014588	1026898	-		chr1	149398797	149400530
LXXXVII	0	PMZ_0000846	scaffold_492	400951	411787	+		chr1	40131899	40131738
LXXXVII	0	PMZ_0000853	scaffold_492	522264	522665	-		chr1	149814615	149814982
LXXXVII	0	PMZ_0000873	scaffold_492	1256639	1258079	-		chr19	2733147	2732752
LXXXVII	0	PMZ_0000848	scaffold_492	427682	435480	-		chr2	234775862	234775497
LXXXVII	0	PMZ_0000842	scaffold_492	187612	196572	-		chr20	10030085	10030906
LXXXVII	0	PMZ_0000862	scaffold_492	717866	718336	-		chr5	1264691	1264521
LXXXVII	0	PMZ_0000863	scaffold_492	726954	733052	-		chr5	1279594	1278681
LXXXVII	0	PMZ_0000866	scaffold_492	1014588	1026898	-		chr6	27783201	27777864
LXXXVII	0	PMZ_0000843	scaffold_492	290276	316100	+		chr6	37623670	37616915
LXXXVII	0	PMZ_0000853	scaffold_492	522264	522665	-		chr6	26251879	26252256
LXXXVII	0	PMZ_0000855	scaffold_492	540605	541147	-		chr6	26017840	26017628
LXXXVII	0	PMZ_0000874	scaffold_492	1410092	1427064	+		chr7	116339229	116340329
LXXXVII	3.45	PMZ_0024070	scaffold_22126	1108	2779	+		chr14	102552464	102550785
LXXXVII	3.45	PMZ_0024070	scaffold_22126	1108	2779	+		chr4	88813136	88814067
LXXXVIII	0	PMZ_0014196	scaffold_3568	21532	40571	+		chr9	115593005	115598697
LXXXVIII	3.45	PMZ_0006442	scaffold_298	205703	219701	-		chr1	11740538	11736071
LXXXVIII	3.45	PMZ_0006441	scaffold_298	179224	188853	-		chr19	13049947	13054443
LXXXVIII	3.45	PMZ_0006439	scaffold_298	54460	65081	-		chr19	16515560	16514541
LXXXVIII	3.45	PMZ_0006445	scaffold_298	283691	299507	-		chr5	161178780	161178463
LXXXVIII	5.174	PMZ_0021349	scaffold_10089	944	5363	+		chr1	66833626	66838109
LXXXVIII	5.174	PMZ_0006986	scaffold_1180	164744	194944	-		chr1	53236703	53267652
LXXXVIII	5.174	PMZ_0004381	scaffold_638	215879	219089	+		chr1	66833381	66833536
LXXXVIII	5.174	PMZ_0021349	scaffold_10089	944	5363	+		chr19	10572544	10577673
LXXXVIII	5.174	PMZ_0006983	scaffold_1180	18263	40826	-		chr19	2763754	2762480
LXXXVIII	5.174	PMZ_0006988	scaffold_1180	212389	212655	+		chr19	1206979	1207203
LXXXVIII	5.174	PMZ_0004381	scaffold_638	215879	219089	+		chr19	10572204	10572368
LXXXVIII	5.174	PMZ_0006985	scaffold_1180	161290	167744	+		chr2	27322037	27322612
LXXXVIII	5.174	PMZ_0006987	scaffold_1180	196266	204898	+		chr4	17621521	17625403
LXXXVIII	5.174	PMZ_0021349	scaffold_10089	944	5363	+		chr5	58272305	58270794
LXXXVIII	5.174	PMZ_0004381	scaffold_638	215879	219089	+		chr5	58273170	58273012
LXXXVIII	5.174	PMZ_0006984	scaffold_1180	59762	93033	-		chrX	136742831	136744353
V	5.192	PMZ_0006520	scaffold_249	270733	291070	+		chr10	50701309	50666867
V	5.192	PMZ_0006519	scaffold_249	164545	250514	-		chr20	4883150	4864287
V	5.192	PMZ_0006515	scaffold_249	97477	99710	+		chr4	110754294	110756665
V	5.192	PMZ_0006519	scaffold_249	164545	250514	-		chr5	138718255	138715899
V	5.192	PMZ_0006514	scaffold_249	65728	96109	+		chr5	134117611	134154696
V	6.935	PMZ_0009598	scaffold_1540	39501	49074	-		chr10	51384297	51387762
V	6.935	PMZ_0002871	scaffold_55	471061	486140	-		chr10	74666353	74692261
V	6.935	PMZ_0002872	scaffold_55	492746	496867	-		chr10	74658415	74658813
V	6.935	PMZ_0009597	scaffold_1540	27397	40655	+		chr5	138874194	138875222
V	8.66	PMZ_0005760	scaffold_443	251537	260735	+		chr10	45477966	45480439
V	8.66	PMZ_0005762	scaffold_443	276007	282378	+		chr10	45486395	45487400
V	8.66	PMZ_0005758	scaffold_443	71333	76452	-		chr10	48428832	48428641
V	8.66	PMZ_0005756	scaffold_443	24172	27169	-		chr2	69098334	69092766
V	8.66	PMZ_0005763	scaffold_443	291980	311032	-		chr2	69784111	69747997
V	8.66	PMZ_0005762	scaffold_443	276007	282378	+		chr20	4768401	4766879
V	8.66	PMZ_0005765	scaffold_443	339787	347327	-		chr3	52324455	52327139
V	8.66	PMZ_0005757	scaffold_443	52702	63612	+		chr4	81121250	81124683
V	8.66	PMZ_0005754	scaffold_443	6801	12241	+		chr4	81207479	81207682
V	8.66	PMZ_0005758	scaffold_443	71333	76452	-		chr4	81967611	81967802
V	9.522	PMZ_0015713	scaffold_5003	2907	5529	-		chr10	50122164	50121436
V	9.522	PMZ_0002021	scaffold_779	156659	174744	+		chr10	104103786	104103926
V	9.522	PMZ_0002023	scaffold_779	283464	291171	-		chr10	71835415	71871433
V	9.522	PMZ_0002020	scaffold_779	98836	109327	+		chr10	104018696	104019872
V	9.522	PMZ_0002032	scaffold_779	583040	599455	+		chr19	49459456	49459590
V	9.522	PMZ_0002029	scaffold_779	447945	452781	-		chr20	5100444	5095932
V	9.522	PMZ_0002030	scaffold_779	453029	474235	+		chr20	5154214	5170856
V	9.522	PMZ_0015714	scaffold_5003	7190	21357	+		chr4	85630166	85611653
V	9.522	PMZ_0002024	scaffold_779	350510	358112	+		chr4	110980933	110972497
V	9.522	PMZ_0002031	scaffold_779	526395	570613	-		chr4	85724520	85654586
V	9.522	PMZ_0002035	scaffold_779	618981	632736	-		chr4	85758246	85752567
V	9.522	PMZ_0002027	scaffold_779	399477	407334	-		chr5	150138555	150095126
V	10.385	PMZ_0017694	scaffold_4390	7943	24412	-		chr10	76414817	76415887
V	10.385	PMZ_0011151	scaffold_805	49238	59431	+		chr2	69577319	69554049
V	10.385	PMZ_0017693	scaffold_4390	648	8156	+		chr4	76434506	76415794
V	10.385	PMZ_0011150	scaffold_805	40936	47639	+		chr5	179765601	179755276
V	10.385	PMZ_0011151	scaffold_805	49238	59431	+		chr5	179745958	179729426
V	29.812	PMZ_0019221	scaffold_10276	9277	18040	-		chr2	152497177	152490165
V	31.537	PMZ_0008931	scaffold_252	72809	85025	-		chr10	71255350	71258140
V	31.537	PMZ_0008928	scaffold_252	3852	11235	-		chr2	74513069	74482904
V	34.762	PMZ_0018079	scaffold_4786	1478	2592	+		chr2	74477646	74477449
V	34.762	PMZ_0018079	scaffold_4786	1478	2592	+		chr4	72319210	72319386
V	40.525	PMZ_0000808	scaffold_529	326992	339166	+		chr1	26393928	26393827
V	40.525	PMZ_0000814	scaffold_529	460442	473342	-		chr1	26393928	26393794
V	40.525	PMZ_0000838	scaffold_529	1324337	1331753	-		chr10	72645686	72643713
V	40.525	PMZ_0000830	scaffold_529	839520	841386	-		chr17	76810634	76809854
V	40.525	PMZ_0000839	scaffold_529	1336797	1353306	-		chr4	187534473	187531024
V	40.525	PMZ_0000839	scaffold_529	1336797	1353306	-		chr5	176005370	176008583
V	57.377	PMZ_0008050	scaffold_1115	32727	37749	+		chr10	115485171	115485296
V	57.377	PMZ_0006957	scaffold_126	114237	121017	-		chr10	114087110	114072082
V	57.377	PMZ_0006958	scaffold_126	122779	124110	-		chr10	114095491	114094796
V	57.377	PMZ_0006962	scaffold_126	160553	188970	+		chr10	114164466	114187107
V	57.377	PMZ_0006963	scaffold_126	203050	218967	+		chr10	114205149	114200175
V	57.377	PMZ_0006952	scaffold_126	33533	44689	+		chr10	70641710	70644749
V	57.377	PMZ_0006962	scaffold_126	160553	188970	+		chr4	185701584	185678282
V	57.377	PMZ_0006952	scaffold_126	33533	44689	+		chr4	184922477	184931032
V	57.377	PMZ_0015067	scaffold_2357	2484	40172	+		chr4	184585030	184618999
V	57.377	PMZ_0006962	scaffold_126	160553	188970	+		chr5	131325240	131289939
V	60.344	PMZ_0006718	scaffold_244	16669	53675	-		chr10	75239240	75230647
V	60.344	PMZ_0006719	scaffold_244	231895	259256	+		chr10	98380282	98380109
[truncated: 4,472 more rows]
