# Supplementary material for: The sea lamprey meiotic map improves resolution of ancient vertebrate genome duplications
Source: HighWire-hosted journal article supplement (doi:10.1101/gr.184135.114), 2015-06-05
Supplement: Supplemental_Table_S4.xlsx [file Supplemental_Table_S4.xlsx]

## Sheet: Sheet1
Table S4 - Location of lamprey linkage groups on the y-axes of
Figure 1 and Figure 1 Supplements
Location on Y-axis	Linkage Group
93	XCII
92	XCI
91	LXXXVII
90	LXXIX
89	LXXVIII
88	LXXI
87	LXV
86	LXII
85	LVIII
84	LIII
83	LI
82	LXXX
81	LXXIV
80	L
79	XLIX
78	XXXIX
77	LV
76	LXIX
75	IX
74	XLII
73	LXVI
72	XXVI
71	XVIII
70	XIV
69	LXXXVIII
68	LXIV
67	XCIV
66	LXXXIV
65	XXXV
64	XXXIV
63	XXVIII
62	XXIII
61	LXXVI
60	LXVII
59	XXIV
58	XIII
57	XXII
56	V
55	LXI
54	XXXVIII
53	LXXXV
52	VII
51	XV
50	VIII
49	LXXXI
48	LXXXIII
47	XCIII
46	XLIII
45	XLI
44	XC
43	LXVIII
42	LX
41	LII
40	LXXII
39	LXX
38	LXIII
37	LVI
36	XXI
35	XX
34	XIX
33	XLIV
32	XXV
31	II
30	XL
29	XCV
28	LXXIII
27	XLVIII
26	XLVII
25	XXXI
24	XVI
23	X
22	XXXIII
21	LXXXII
20	LIX
19	XLVI
18	XXXVI
17	XII
16	XVII
15	LIV
14	XXXII
13	IV
12	LXXV
11	LVII
10	XXVII
9	XI
8	VI
7	III
6	LXXXIX
5	XLV
4	XXXVII
3	XXX
2	XXIX
1	I
